# Supplementary material for: The Expression Profiles and Deregulation of UDP-Glycosyltransferase (UGT) Genes in Human Cancers and Their Association with Clinical Outcomes
Source: MDPI journal article supplement (doi:10.3390/cancers13174491), 2021-09-06
Supplement: s1 [file s1]

Article

# The Expression Profiles and Deregulation of UDP-Glycosyl-transferase (*UGT*) Genes in Human Cancers and Their Association with Clinical Outcomes

Dong Gui Hu <sup>1,\*</sup>, Shashikanth Marri <sup>2</sup>, Peter I. Mackenzie <sup>1</sup>, Julie-Ann Hulin <sup>1</sup>, Ross A McKinnon <sup>1</sup> and Robyn Meech <sup>1</sup>

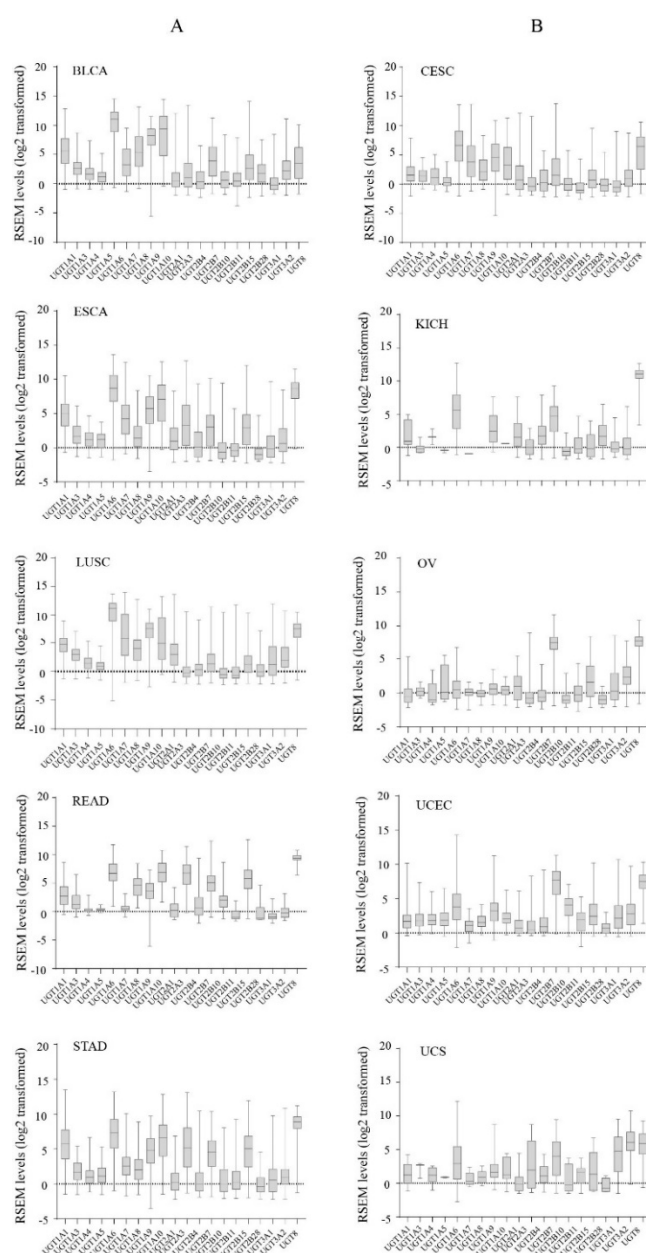

**Figure S1.** The expression profiles of *UGT* genes in ten different types of TCGA cancers. The log<sub>2</sub>-transformed expression levels (RSEM values) of *UGT* genes in ten TCGA cancer types as indicated are presented using the box-and-whisker plots that show the distribution of the expression levels (minimum, first quartile, median, third quartile, and maximum) in each of these cancers. Shown are cancers with high expression (log<sub>2</sub>-transformed value > 5) of 3-5 *UGT* genes (A) or 2 *UGT* genes (B).

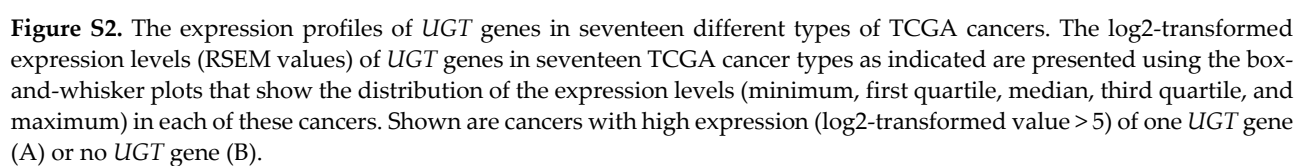

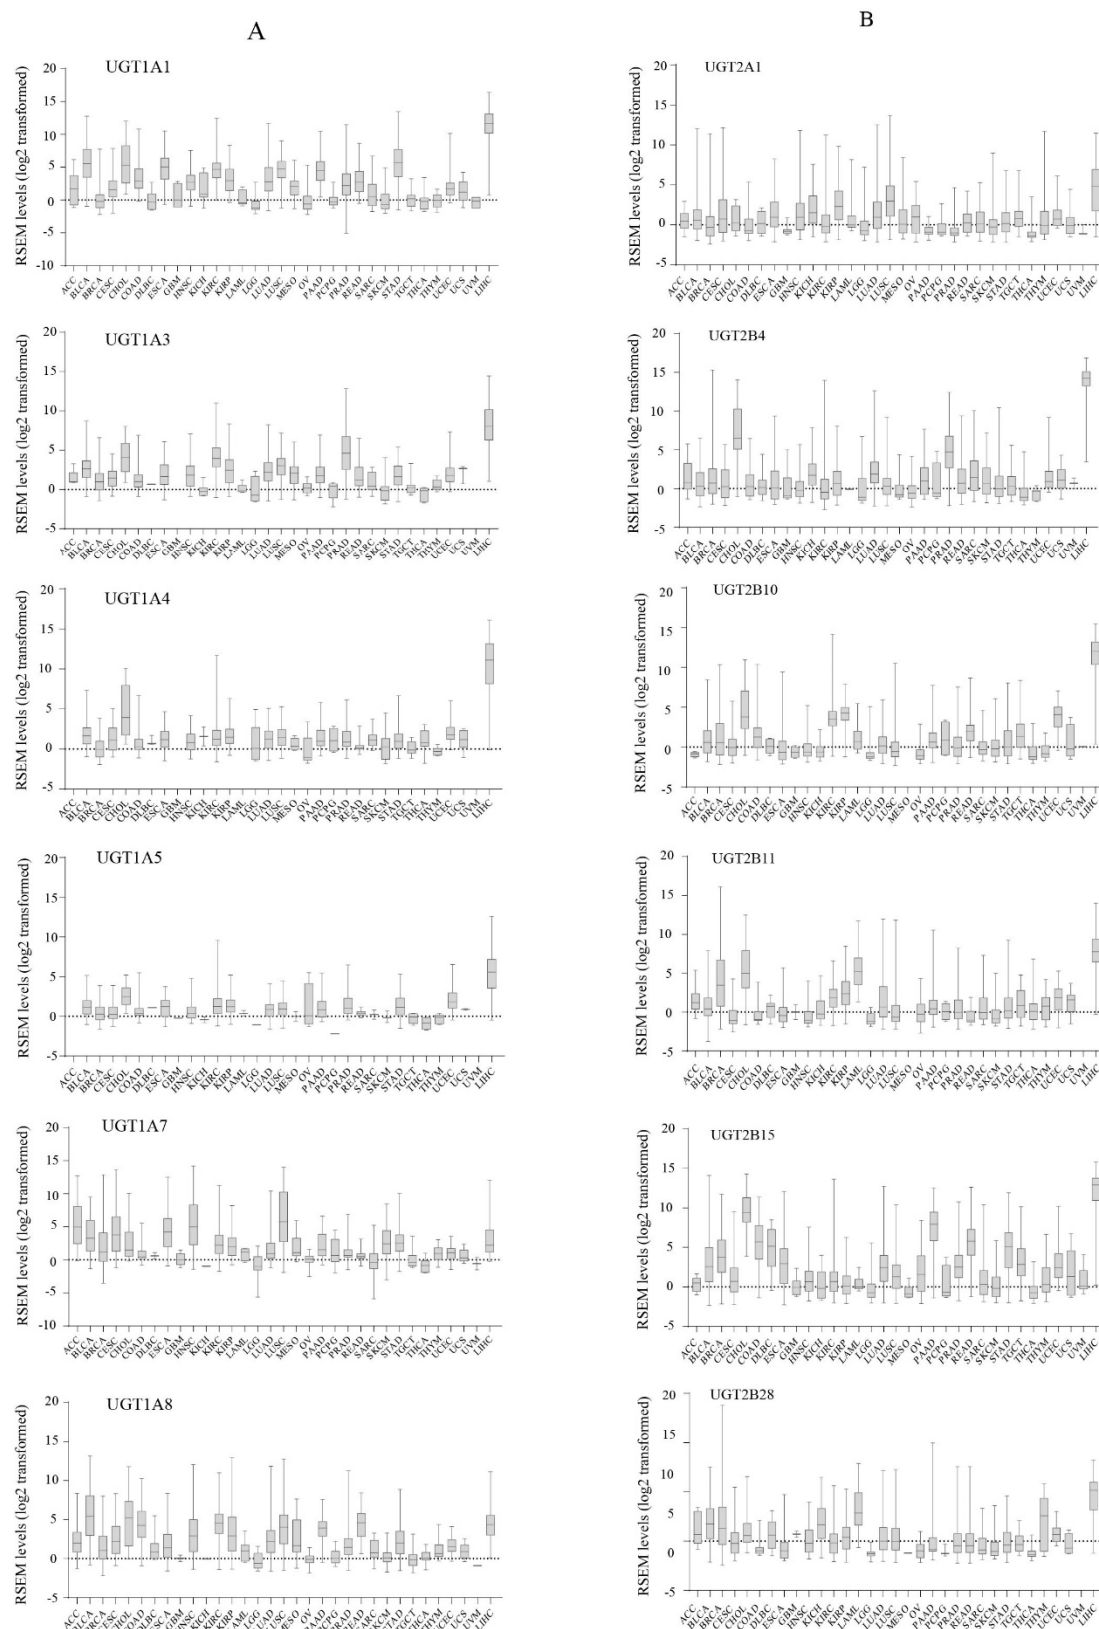

**Figure S3.** The expression profiles of 12 *UGT* genes in 33 different types of TCGA cancers. The log<sub>2</sub>-transformed expression levels (RSEM values) of six *UGT1A* (A) and six *UGT2B* (B) genes in 33 TCGA cancer types as indicated are presented using the box-and-whisker plots that show the distribution of the expression levels (minimum, first quartile, median, third quartile, and maximum) in each of these cancers.

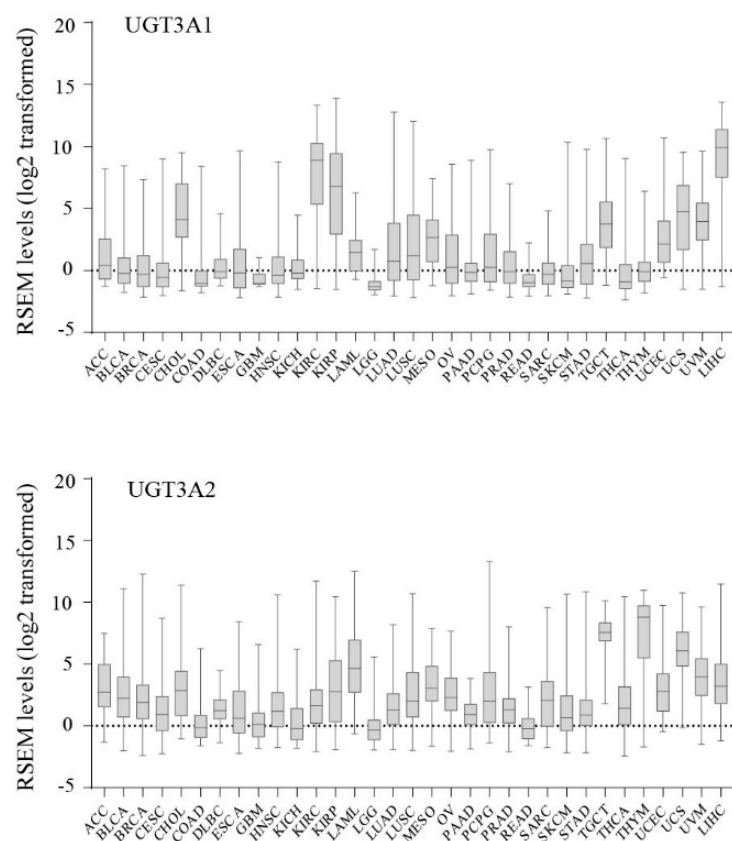

**Figure S4.** The expression profiles of *UGT3A* genes in 33 different types of TCGA cancers. The log2-transformed expression levels (RSEM values) of *UGT3A1* and *UGT3A2* genes in 33 TCGA cancer types as indicated are presented using the box-and-whisker plots that show the distribution of the expression levels (minimum, first quartile, median, third quartile, and maximum) in each of these cancers.

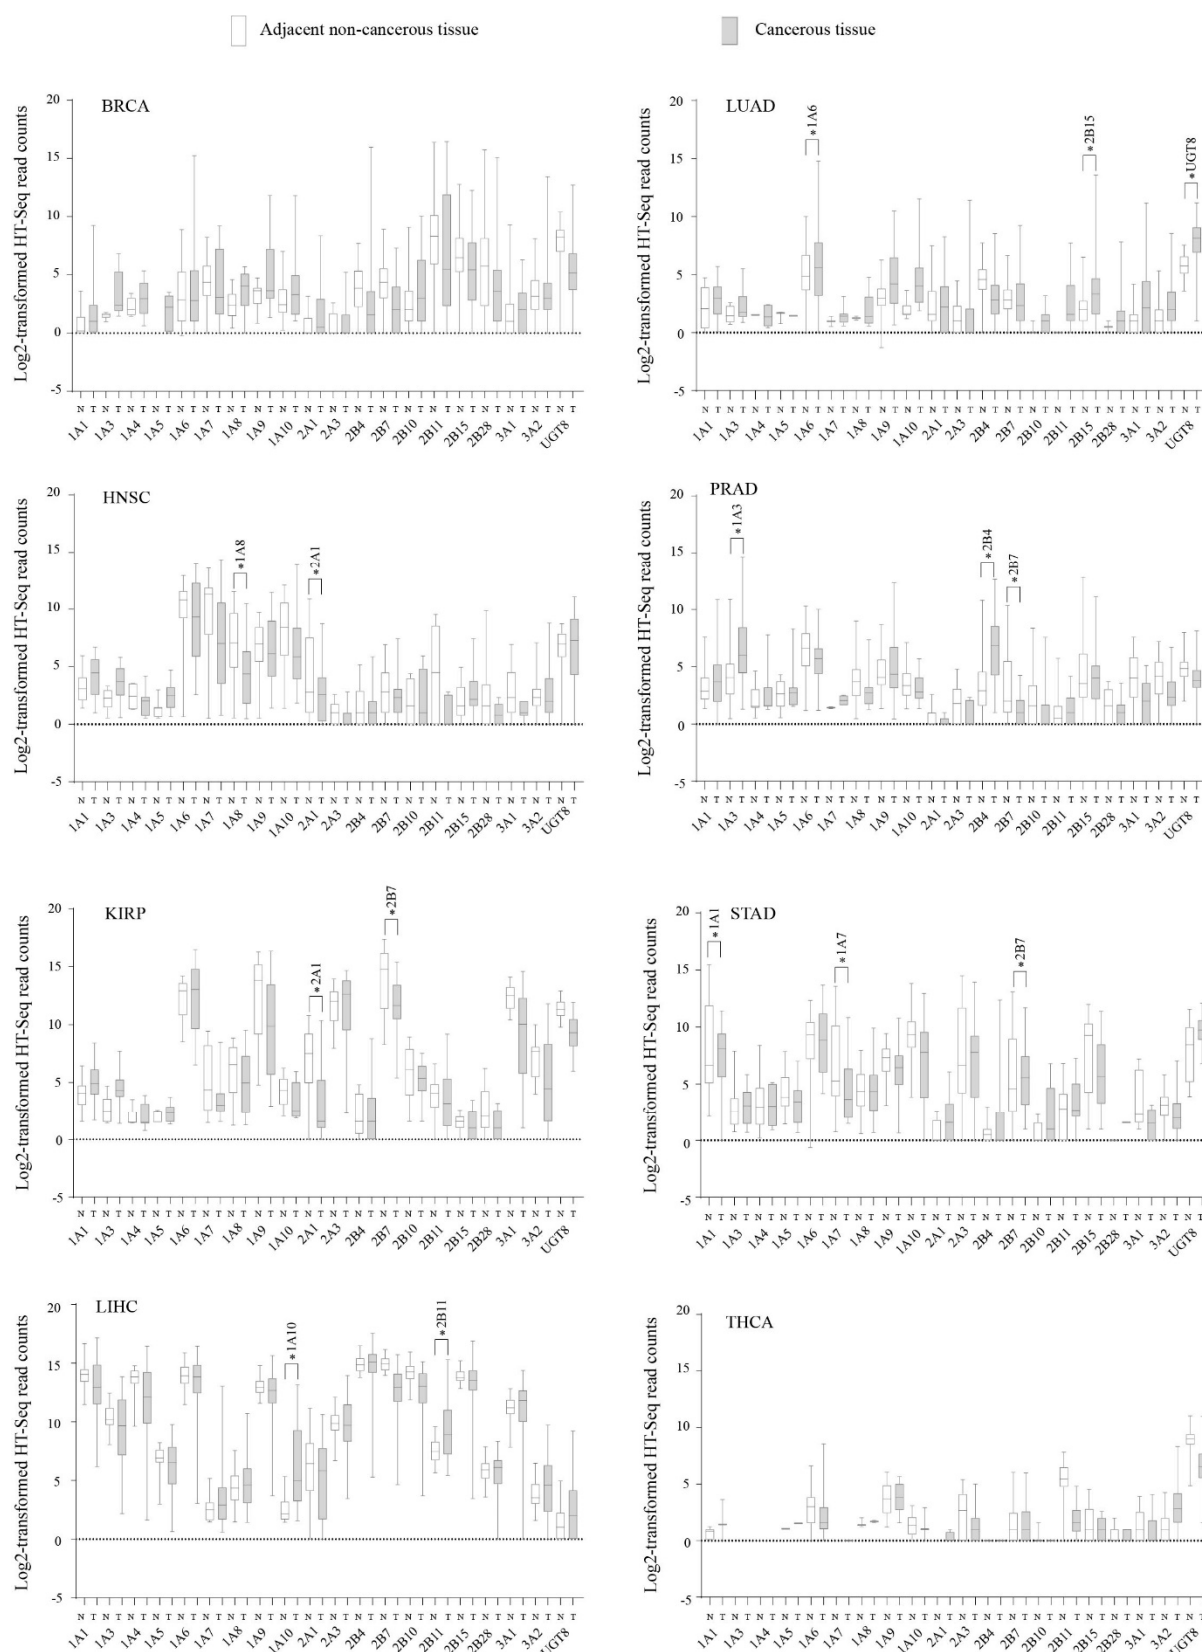

**Figure S5.** Expression of *UGT* genes in matched cancerous (T) and adjacent non-cancerous (N) tissues in eight different TCGA cancers types. The log2-transformed expression levels (HT-Seq values) of *UGT* genes in matched cancerous (T) and adjacent non-cancerous (N) tissues from eight TCGA cancer types (BRCA, HNSC, KIRP, LIHC, LUAD, PRAD, STAD, THCA) as indicated are presented using the box-and-whisker plots that show the distribution of the expression levels (minimum, first quartile, median, third quartile, and maximum) in each of these cancers. Up/downregulated *UGT* genes are highlighted with \* indicating a Benjamini-Hochberg-adjusted p value of < 0.01. .
