# Supplementary material for: The Expression Profiles and Deregulation of UDP-Glycosyltransferase (UGT) Genes in Human Cancers and Their Association with Clinical Outcomes
Source: Cancers (Basel). 2021 Sep 6;13(17):4491. doi: 10.3390/cancers13174491 (PMC8430925; doi:10.3390/cancers13174491)
Supplement: Supplementary file 1 [file cancers-13-04491-s001.zip]

Archive with 6 entries (6 files):
- Supplemental Figures (Figures S1¿CS5).pdf
- Table S1.xlsx
- Table S2.xlsx
- Table S3.xlsx
- Table S4.xlsx
- Table S5.xlsx
