# Supplementary material for: The Expression Profiles and Deregulation of UDP-Glycosyltransferase (UGT) Genes in Human Cancers and Their Association with Clinical Outcomes
Source: Cancers (Basel). 2021 Sep 6;13(17):4491. doi: 10.3390/cancers13174491 (PMC8430925; doi:10.3390/cancers13174491)
Supplement: Supplementary file 1 [file cancers-13-04491-s001.zip › Table S1.xlsx]

## Sheet: ACC
gene_id	UGT1A10|54575	UGT1A1|54658	UGT1A3|54659	UGT1A4|54657	UGT1A5|54579	UGT1A6|54578	UGT1A7|54577	UGT1A8|54576	UGT1A9|54600	UGT2A1|10941	UGT2A3|79799	UGT2B10|7365	UGT2B11|10720	UGT2B15|7366	UGT2B28|54490	UGT2B4|7363	UGT2B7|7364	UGT3A1|133688	UGT3A2|167127	UGT8|7368	bcr_patient_barcode	type	age_at_initial_pathologic_diagnosis	gender	race	ajcc_pathologic_tumor_stage	clinical_stage	histological_type	histological_grade	initial_pathologic_dx_year	menopause_status	birth_days_to	vital_status	tumor_status	last_contact_days_to	death_days_to	cause_of_death	new_tumor_event_type	new_tumor_event_site	new_tumor_event_site_other	new_tumor_event_dx_days_to	treatment_outcome_first_course	margin_status	residual_tumor	OS	OS.time	DSS	DSS.time	DFI
TCGA-OR-A5J1-01A-11R-A29S-07	0	0	0	0	0	0	0	0	0	0	0	0	0	0	0	0	0	0	2.8818	8.6455	TCGA-OR-A5J1	ACC	58	MALE	WHITE	Stage II	[Not Applicable]	Adrenocortical carcinoma- Usual Type	[Not Available]	2000	[Not Available]	-21496	Dead	WITH TUMOR	#N/A	1355	[Not Available]	Distant Metastasis	Peritoneal Surfaces	#N/A	754	Complete Remission/Response	#N/A	#N/A	1	1355	1	1355	1
TCGA-OR-A5J2-01A-11R-A29S-07	0	0	0	0	0	0	0	0.4026	0	0	0	0	2.8184	0	1.6105	0	0	0	2.8184	0.8053	TCGA-OR-A5J2	ACC	44	FEMALE	WHITE	Stage IV	[Not Applicable]	Adrenocortical carcinoma- Usual Type	[Not Available]	2004	[Not Available]	-16090	Dead	WITH TUMOR	#N/A	1677	[Not Available]	Distant Metastasis	Soft Tissue	#N/A	289	Progressive Disease	#N/A	#N/A	1	1677	1	1677	#N/A
TCGA-OR-A5J3-01A-11R-A29S-07	0	0	0	0	0	73.8379	185.087	0	0	1.7775	0	0	0	2.37	0	0	0	0	4.74	1.185	TCGA-OR-A5J3	ACC	23	FEMALE	WHITE	Stage III	[Not Applicable]	Adrenocortical carcinoma- Usual Type	[Not Available]	2008	[Not Available]	-8624	Alive	WITH TUMOR	2091	#N/A	[Not Available]	Distant Metastasis	Lung	#N/A	53	Complete Remission/Response	#N/A	#N/A	0	2091	0	2091	1
TCGA-OR-A5J5-01A-11R-A29S-07	0	0	0	0	0	0	1.5492	0	0	0	0	0	0	0	0	0	0	1.5492	10.8443	24.787	TCGA-OR-A5J5	ACC	30	MALE	WHITE	Stage III	[Not Applicable]	Adrenocortical carcinoma- Usual Type	[Not Available]	2000	[Not Available]	-11171	Dead	WITH TUMOR	#N/A	365	[Not Available]	Locoregional Recurrence	Other, specify	vena cava thrombus	50	Progressive Disease	#N/A	#N/A	1	365	1	365	#N/A
TCGA-OR-A5J6-01A-31R-A29S-07	0	39.7179	0	0	0	672.02	874.583	9.9085	133.992	0.5589	0	0	0	0	0	0	0.5589	0	1.1177	0	TCGA-OR-A5J6	ACC	29	FEMALE	BLACK OR AFRICAN AMERICAN	Stage II	[Not Applicable]	Adrenocortical carcinoma- Usual Type	[Not Available]	2006	[Not Available]	-10839	Alive	TUMOR FREE	2703	#N/A	[Not Available]	#N/A	#N/A	#N/A	#N/A	Complete Remission/Response	#N/A	#N/A	0	2703	0	2703	0
TCGA-OR-A5J7-01A-11R-A29S-07	0	0	0	0	0	0	0	0	0	0	1.2034	0	0	0	0	0	0	0	11.6326	0	TCGA-OR-A5J7	ACC	30	FEMALE	WHITE	Stage III	[Not Applicable]	Adrenocortical carcinoma- Usual Type	[Not Available]	2009	[Not Available]	-11279	Dead	WITH TUMOR	#N/A	490	[Not Available]	Locoregional Recurrence	Retroperitoneal lymph nodes	#N/A	162	Progressive Disease	#N/A	#N/A	1	490	1	490	#N/A
TCGA-OR-A5J8-01A-11R-A29S-07	2.9341	0	0	0	0	0	2.4368	2.9175	0	0	0	0	0	0	0	9.5317	4.5586	0.4144	44.3431	0.8288	TCGA-OR-A5J8	ACC	66	MALE	WHITE	Stage III	[Not Applicable]	Adrenocortical carcinoma- Usual Type	[Not Available]	2011	[Not Available]	-24266	Dead	WITH TUMOR	#N/A	579	[Not Available]	Locoregional Recurrence	Peritoneal Surfaces	#N/A	530	Complete Remission/Response	#N/A	#N/A	1	579	1	579	1
TCGA-OR-A5J9-01A-11R-A29S-07	0	0	0	0	0	0	0	0	0	0	0	0	0	0	0	0	0	0	4.0798	15.9791	TCGA-OR-A5J9	ACC	22	FEMALE	WHITE	Stage II	[Not Applicable]	Adrenocortical carcinoma- Usual Type	[Not Available]	2010	[Not Available]	-8175	Alive	WITH TUMOR	1352	#N/A	[Not Available]	Distant Metastasis	Lung	#N/A	414	Complete Remission/Response	#N/A	#N/A	0	1352	0	1352	1
TCGA-OR-A5JA-01A-11R-A29S-07	1.6332	0.5761	0	0	0	99.0909	71.4112	1.7019	0	1.5856	8.9852	0	1.5856	0	0	1.5856	0	0	4.7569	11.0994	TCGA-OR-A5JA	ACC	53	FEMALE	WHITE	Stage IV	[Not Applicable]	Adrenocortical carcinoma- Usual Type	[Not Available]	2004	[Not Available]	-19436	Dead	WITH TUMOR	#N/A	922	[Not Available]	#N/A	#N/A	#N/A	#N/A	[Not Available]	#N/A	#N/A	1	922	1	922	#N/A
TCGA-OR-A5JB-01A-11R-A29S-07	0	0	0	0	0	0	6.6837	0	0	0	0	0	0	0	0	0	0	0	3.1191	0.8912	TCGA-OR-A5JB	ACC	52	MALE	WHITE	Stage IV	[Not Applicable]	Adrenocortical carcinoma- Usual Type	[Not Available]	2000	[Not Available]	-19172	Dead	#N/A	#N/A	551	[Not Available]	#N/A	#N/A	#N/A	#N/A	[Unknown]	#N/A	#N/A	1	551	#N/A	551	#N/A
TCGA-OR-A5JC-01A-11R-A29S-07	0	0	0	0	0	3.8168	0	0	0	0	0.6361	0	0	0	0	0	0	6.9975	47.7099	4.4529	TCGA-OR-A5JC	ACC	37	MALE	WHITE	[Not Available]	[Not Applicable]	Adrenocortical carcinoma- Usual Type	[Not Available]	2001	[Not Available]	-13862	Dead	#N/A	#N/A	1750	[Not Available]	#N/A	#N/A	#N/A	#N/A	[Not Available]	#N/A	#N/A	1	1750	#N/A	1750	#N/A
TCGA-OR-A5JD-01A-11R-A29S-07	0	24.8362	1.8447	0	0	964.09	1597.85	1.7354	77.1177	0.6068	5.4612	0	0	0	1.2136	2.4272	0.6068	0	4.2476	4.2476	TCGA-OR-A5JD	ACC	57	FEMALE	WHITE	Stage II	[Not Applicable]	Adrenocortical Carcinoma- Oncocytic Type	[Not Available]	2005	[Not Available]	-20989	Alive	TUMOR FREE	3038	#N/A	[Not Available]	#N/A	#N/A	#N/A	#N/A	Complete Remission/Response	#N/A	#N/A	0	3038	0	3038	0
TCGA-OR-A5JE-01A-11R-A29S-07	0	0	0	0	0	3.3937	0	0	0	0	0	0	0.5656	0	0	0	0	0	3.9593	0	TCGA-OR-A5JE	ACC	17	FEMALE	WHITE	Stage I	[Not Applicable]	Adrenocortical carcinoma- Usual Type	[Not Available]	2005	[Not Available]	-6455	Dead	WITH TUMOR	#N/A	2105	[Not Available]	Locoregional Recurrence	#N/A	#N/A	477	[Unknown]	#N/A	#N/A	1	2105	1	2105	#N/A
TCGA-OR-A5JF-01A-11R-A29S-07	0	0	0	0	0	7.1629	4.0351	0	0	0	0	0.3861	0	0	0	0	0	0	36.2969	0	TCGA-OR-A5JF	ACC	69	FEMALE	WHITE	Stage II	[Not Applicable]	Adrenocortical carcinoma- Usual Type	[Not Available]	2007	[Not Available]	-25502	Alive	TUMOR FREE	2015	#N/A	[Not Available]	#N/A	#N/A	#N/A	#N/A	Complete Remission/Response	#N/A	#N/A	0	2015	0	2015	0
TCGA-OR-A5JG-01A-11R-A29S-07	0	0	0	0	0	1.5155	14.0696	0	0	0	1.0748	0	0	0	0	0	0.5374	0	24.1838	0.5374	TCGA-OR-A5JG	ACC	61	MALE	WHITE	Stage IV	[Not Applicable]	Adrenocortical carcinoma- Usual Type	[Not Available]	2008	[Not Available]	-22390	Dead	WITH TUMOR	#N/A	541	[Not Available]	#N/A	#N/A	#N/A	#N/A	[Not Available]	#N/A	#N/A	1	541	1	541	#N/A
TCGA-OR-A5JI-01A-11R-A29S-07	3.8205	5.8742	0	0	0	1547.71	258.945	5.5319	33.8113	0	1.8501	0	0	0	0	0	0	0	0	2.7752	TCGA-OR-A5JI	ACC	22	MALE	WHITE	Stage I	[Not Applicable]	Adrenocortical carcinoma- Usual Type	[Not Available]	2008	[Not Available]	-8177	Alive	TUMOR FREE	2331	#N/A	[Not Available]	#N/A	#N/A	#N/A	#N/A	Complete Remission/Response	#N/A	#N/A	0	2331	0	2331	0
TCGA-OR-A5JJ-01A-11R-A29S-07	0.8925	0	0	0	0	0	0	0	0	2.2311	0.4462	0	0	0	0	0	0	0	10.7095	1.3387	TCGA-OR-A5JJ	ACC	65	MALE	WHITE	Stage IV	[Not Applicable]	Adrenocortical carcinoma- Usual Type	[Not Available]	2009	[Not Available]	-24082	Dead	WITH TUMOR	#N/A	490	[Not Available]	#N/A	#N/A	#N/A	#N/A	Progressive Disease	#N/A	#N/A	1	490	1	490	#N/A
TCGA-OR-A5JK-01A-11R-A29S-07	0	0	0	0	0	1.5256	0	0	0	0	0	0	41.9527	0	10.6789	9.9161	2.2883	0	180.015	3.8139	TCGA-OR-A5JK	ACC	49	MALE	WHITE	Stage IV	[Not Applicable]	Adrenocortical carcinoma- Usual Type	[Not Available]	2009	[Not Available]	-18214	Alive	TUMOR FREE	1497	#N/A	[Not Available]	#N/A	#N/A	#N/A	#N/A	Partial Remission/Response	#N/A	#N/A	0	1497	0	1497	#N/A
TCGA-OR-A5JL-01A-11R-A29S-07	0	0.5403	0	0	0	17.4066	10.9514	3.1196	7.4513	0.9396	40.8739	0	15.1703	0	0	12.685	0	19.7322	15.5039	0	TCGA-OR-A5JL	ACC	36	FEMALE	WHITE	Stage I	[Not Applicable]	Adrenocortical carcinoma- Usual Type	[Not Available]	2009	[Not Available]	-13155	Alive	TUMOR FREE	2056	#N/A	[Not Available]	#N/A	#N/A	#N/A	#N/A	Complete Remission/Response	#N/A	#N/A	0	2056	0	2056	0
TCGA-OR-A5JM-01A-11R-A29S-07	0	0	0	0	0	0.431	0	0	0	0	0.431	0	0	0	0	0	0	0	1.2931	0	TCGA-OR-A5JM	ACC	25	FEMALE	WHITE	Stage IV	[Not Applicable]	Adrenocortical carcinoma- Usual Type	[Not Available]	2011	[Not Available]	-9359	Dead	WITH TUMOR	#N/A	562	[Not Available]	Distant Metastasis	Liver	#N/A	72	Progressive Disease	#N/A	#N/A	1	562	1	562	#N/A
TCGA-OR-A5JO-01A-11R-A29S-07	0	0.5615	0	0	0	22.0069	6.0471	0	0	1.6197	22.6764	0	0	0	0	2.6996	0	0	0.5399	141.998	TCGA-OR-A5JO	ACC	26	FEMALE	WHITE	Stage I	[Not Applicable]	Adrenocortical carcinoma- Usual Type	[Not Available]	2005	[Not Available]	-9547	Alive	TUMOR FREE	1194	#N/A	[Not Available]	#N/A	#N/A	#N/A	#N/A	Complete Remission/Response	#N/A	#N/A	0	1194	0	1194	0
TCGA-OR-A5JP-01A-11R-A29S-07	5.1427	0	0	0	0	6.6579	12.5165	0	2.0334	0.8783	0	0	0	0	0	0	0	0	1.3175	0	TCGA-OR-A5JP	ACC	40	MALE	WHITE	Stage II	[Not Applicable]	Adrenocortical carcinoma- Usual Type	[Not Available]	2012	[Not Available]	-14667	Alive	TUMOR FREE	464	#N/A	[Not Available]	#N/A	#N/A	#N/A	#N/A	Complete Remission/Response	#N/A	#N/A	0	464	0	464	0
TCGA-OR-A5JQ-01A-11R-A29S-07	0	2.771	0	0	0	160.752	134.516	3.9654	0.9675	0.3981	5.1757	0	1.1944	0	0	0	0.3981	0	1.1944	0.3981	TCGA-OR-A5JQ	ACC	26	FEMALE	WHITE	Stage II	[Not Applicable]	Adrenocortical Carcinoma- Myxoid Type	[Not Available]	2006	[Not Available]	-9667	Alive	TUMOR FREE	1103	#N/A	[Not Available]	#N/A	#N/A	#N/A	#N/A	Complete Remission/Response	#N/A	#N/A	0	1103	0	1103	0
TCGA-OR-A5JR-01A-11R-A29S-07	0	51.7089	0	0	0	484.183	1393.47	29.0469	43.9296	1.8779	6.1033	0	0	0	0	0.4695	0	0	6.5728	0.4695	TCGA-OR-A5JR	ACC	45	MALE	WHITE	Stage I	[Not Applicable]	Adrenocortical carcinoma- Usual Type	[Not Available]	2002	[Not Available]	-16604	Alive	TUMOR FREE	3688	#N/A	[Not Available]	#N/A	#N/A	#N/A	#N/A	Complete Remission/Response	#N/A	#N/A	0	3688	0	3688	0
TCGA-OR-A5JS-01A-11R-A29S-07	0	0	0	0	0	3.9845	2.3048	0	0	0	0	0	0	0	0	0	0	0	8.1391	0	TCGA-OR-A5JS	ACC	65	FEMALE	WHITE	Stage II	[Not Applicable]	Adrenocortical carcinoma- Usual Type	[Not Available]	2011	[Not Available]	-24017	Alive	WITH TUMOR	383	#N/A	[Not Available]	Distant Metastasis	Lung	#N/A	166	[Not Available]	#N/A	#N/A	0	383	0	383	#N/A
TCGA-OR-A5JT-01A-11R-A29S-07	0	3.3874	0	0	0	39.332	135.35	5.652	0.5733	6.6327	6.6327	0	1.8951	1.4213	0	1.4213	0.4738	0	30.7947	0	TCGA-OR-A5JT	ACC	65	FEMALE	WHITE	Stage II	[Not Applicable]	Adrenocortical carcinoma- Usual Type	[Not Available]	2011	[Not Available]	-23794	Alive	WITH TUMOR	907	#N/A	[Not Available]	#N/A	#N/A	#N/A	#N/A	Stable Disease	#N/A	#N/A	0	907	0	907	#N/A
TCGA-OR-A5JV-01A-11R-A29S-07	0	2.3676	0	0	0	16.2617	18.9408	8.6397	0	0	1.0384	0	0	0	0	0	0	1.0384	2.5961	39.46	TCGA-OR-A5JV	ACC	55	MALE	WHITE	Stage II	[Not Applicable]	Adrenocortical carcinoma- Usual Type	[Not Available]	2008	[Not Available]	-20319	Alive	TUMOR FREE	2023	#N/A	[Not Available]	New Primary Tumor	Lymph Node(s)	#N/A	953	Complete Remission/Response	#N/A	#N/A	0	2023	0	2023	0
TCGA-OR-A5JW-01A-11R-A29S-07	0	9.3287	0	0	0	49.4032	118.153	0	2.5845	0.4388	0	0	0	0	0	0	0	0	10.0921	0.8776	TCGA-OR-A5JW	ACC	47	MALE	WHITE	Stage II	[Not Applicable]	Adrenocortical carcinoma- Usual Type	[Not Available]	2008	[Not Available]	-17513	Alive	TUMOR FREE	2202	#N/A	[Not Available]	#N/A	#N/A	#N/A	#N/A	Complete Remission/Response	#N/A	#N/A	0	2202	0	2202	0
TCGA-OR-A5JX-01A-11R-A29S-07	0	0	0	0	0	0	0	0	0	0	0	0	0	0	0	0	0	0	73.2933	0	TCGA-OR-A5JX	ACC	50	MALE	WHITE	Stage III	[Not Applicable]	Adrenocortical carcinoma- Usual Type	[Not Available]	2009	[Not Available]	-18402	Alive	TUMOR FREE	950	#N/A	[Not Available]	#N/A	#N/A	#N/A	#N/A	[Not Available]	#N/A	#N/A	0	950	0	950	#N/A
TCGA-OR-A5JY-01A-31R-A29S-07	0	0.4568	0	0	0	10.2911	0	0	0	3.1348	14.3305	0	25.8352	0	7.6131	16.5696	0	3.1348	46.1263	317.062	TCGA-OR-A5JY	ACC	68	FEMALE	WHITE	Stage IV	[Not Applicable]	Adrenocortical carcinoma- Usual Type	[Not Available]	2011	[Not Available]	-25190	Dead	WITH TUMOR	#N/A	552	[Not Available]	Distant Metastasis	Liver	#N/A	75	Progressive Disease	#N/A	#N/A	1	552	1	552	#N/A
TCGA-OR-A5JZ-01A-11R-A29S-07	0	6.361	2.0554	0	0	167.315	283.211	328.202	13.5281	2.6868	8.7322	0.6717	1.3434	0	0	1.3434	1.3434	0	180.017	0	TCGA-OR-A5JZ	ACC	60	MALE	WHITE	Stage II	[Not Applicable]	Adrenocortical carcinoma- Usual Type	[Not Available]	2011	[Not Available]	-22218	Alive	WITH TUMOR	822	#N/A	[Not Available]	Distant Metastasis	Liver	#N/A	247	Progressive Disease	#N/A	#N/A	0	822	0	822	#N/A
TCGA-OR-A5K0-01A-11R-A29S-07	1.0571	0	0	0	0	0	0	0	0	0	0.5285	0	0	3.1712	0	0	2.1142	0	14.7992	2.6427	TCGA-OR-A5K0	ACC	69	FEMALE	WHITE	Stage II	[Not Applicable]	Adrenocortical carcinoma- Usual Type	[Not Available]	2009	[Not Available]	-25400	Alive	WITH TUMOR	1029	#N/A	[Not Available]	Distant Metastasis	Lung	#N/A	659	Progressive Disease	#N/A	#N/A	0	1029	0	1029	#N/A
TCGA-OR-A5K1-01A-11R-A29S-07	0	0	0	0	0	13.0757	24.9423	2.5588	0	0.8281	0.8281	0	0	0	0	0	0	0	33.1239	0	TCGA-OR-A5K1	ACC	48	MALE	WHITE	Stage II	[Not Applicable]	Adrenocortical carcinoma- Usual Type	[Not Available]	2006	[Not Available]	-17596	Alive	TUMOR FREE	3289	#N/A	[Not Available]	Locoregional Recurrence	Peritoneal Surfaces	#N/A	826	Complete Remission/Response	#N/A	#N/A	0	3289	0	3289	1
TCGA-OR-A5K2-01A-11R-A29S-07	0	0	0	0	0	0	0	0	0	0	0	0	0	0	0	0	0	0	12.9562	1.7275	TCGA-OR-A5K2	ACC	32	FEMALE	WHITE	Stage III	[Not Applicable]	Adrenocortical carcinoma- Usual Type	[Not Available]	2010	[Not Available]	-11970	Dead	WITH TUMOR	#N/A	994	[Not Available]	Distant Metastasis	Lung	#N/A	97	Progressive Disease	#N/A	#N/A	1	994	1	994	#N/A
TCGA-OR-A5K3-01A-11R-A29S-07	0	0	0	0	0	147.05	22.652	0	20.4657	1.2937	0	0	0	0	0	0	1.2937	7.762	5.1746	0	TCGA-OR-A5K3	ACC	53	MALE	WHITE	Stage II	[Not Applicable]	Adrenocortical Carcinoma- Oncocytic Type	[Not Available]	2005	[Not Available]	-19375	Alive	TUMOR FREE	3465	#N/A	[Not Available]	#N/A	#N/A	#N/A	#N/A	Complete Remission/Response	#N/A	#N/A	0	3465	0	3465	0
TCGA-OR-A5K4-01A-11R-A29S-07	0	0	0	0	0	2.2411	0	0	0	4.4821	107.572	0.5603	3.3616	0	0.5603	1.6808	0	1.1205	53.2255	3.9219	TCGA-OR-A5K4	ACC	64	FEMALE	WHITE	Stage III	[Not Applicable]	Adrenocortical carcinoma- Usual Type	[Not Available]	2011	[Not Available]	-23481	Alive	TUMOR FREE	1082	#N/A	[Not Available]	#N/A	#N/A	#N/A	#N/A	Complete Remission/Response	#N/A	#N/A	0	1082	0	1082	0
TCGA-OR-A5K5-01A-11R-A29S-07	2.9904	0	0	0	0	0.5512	0	0	1.5113	0	0	0	0	0	0	0	0	0	4.1341	0	TCGA-OR-A5K5	ACC	59	FEMALE	WHITE	Stage III	[Not Applicable]	Adrenocortical carcinoma- Usual Type	[Not Available]	2012	[Not Available]	-21907	Dead	WITH TUMOR	#N/A	498	[Not Available]	Distant Metastasis	Lung	#N/A	108	Progressive Disease	#N/A	#N/A	1	498	1	498	#N/A
TCGA-OR-A5K6-01A-11R-A29S-07	0	0	0	0	0	2.0192	0	0	0	0	0	0	0	0	0	0	0	0	14.6391	0.5048	TCGA-OR-A5K6	ACC	56	FEMALE	WHITE	Stage II	[Not Applicable]	Adrenocortical carcinoma- Usual Type	[Not Available]	2010	[Not Available]	-20657	Alive	WITH TUMOR	1493	#N/A	[Not Available]	Distant Metastasis	Liver	#N/A	391	Complete Remission/Response	#N/A	#N/A	0	1493	0	1493	1
TCGA-OR-A5K8-01A-11R-A29S-07	0	3.0189	0	0	0	143.106	39.6517	0	0	2.9028	0	0	0	0	0	0	1.4514	0	0	0	TCGA-OR-A5K8	ACC	39	MALE	WHITE	Stage II	[Not Applicable]	Adrenocortical carcinoma- Usual Type	[Not Available]	2012	[Not Available]	-14435	Alive	TUMOR FREE	749	#N/A	[Not Available]	#N/A	#N/A	#N/A	#N/A	Complete Remission/Response	#N/A	#N/A	0	749	0	749	0
TCGA-OR-A5K9-01A-11R-A29S-07	0	0	0	0	0	0	0	0	0	0	0.4398	0	0	0	0	0	0	0	27.7045	0	TCGA-OR-A5K9	ACC	61	FEMALE	WHITE	Stage II	[Not Applicable]	Adrenocortical carcinoma- Usual Type	[Not Available]	2002	[Not Available]	-22596	Dead	WITH TUMOR	#N/A	344	[Not Available]	Locoregional Recurrence	Peritoneal Surfaces	#N/A	236	[Not Available]	#N/A	#N/A	1	344	1	344	#N/A
TCGA-OR-A5KO-01A-11R-A29S-07	0	0.4873	0	0	0	0	15.9138	0	0	0.9372	0	0	0	0	0	0	0	0	0	0.9372	TCGA-OR-A5KO	ACC	39	FEMALE	WHITE	Stage IV	[Not Applicable]	Adrenocortical carcinoma- Usual Type	[Not Available]	2009	[Not Available]	-14606	Alive	WITH TUMOR	1414	#N/A	[Not Available]	Distant Metastasis	Lung	#N/A	541	Progressive Disease	#N/A	#N/A	0	1414	0	1414	#N/A
TCGA-OR-A5KT-01A-11R-A29S-07	0	0	0	0	0	0	0	0	0	0	0.9634	0	0	0	0	0	0	0	0	0	TCGA-OR-A5KT	ACC	44	FEMALE	WHITE	Stage I	[Not Applicable]	Adrenocortical carcinoma- Usual Type	[Not Available]	2006	[Not Available]	-16217	Alive	TUMOR FREE	2895	#N/A	[Not Available]	Distant Metastasis	Other, specify	Pancreas	2099	Complete Remission/Response	#N/A	#N/A	0	2895	0	2895	1
TCGA-OR-A5KU-01A-11R-A29S-07	0	0	0	0	0	6.7277	0	0	0	0.7475	0.7475	0	5.4195	0	0	0	0	4.4851	72.5098	0	TCGA-OR-A5KU	ACC	37	FEMALE	WHITE	Stage II	[Not Applicable]	Adrenocortical carcinoma- Usual Type	[Not Available]	2000	[Not Available]	-13559	Alive	TUMOR FREE	4673	#N/A	[Not Available]	#N/A	#N/A	#N/A	#N/A	Complete Remission/Response	#N/A	#N/A	0	4673	0	4673	0
TCGA-OR-A5KV-01A-11R-A29S-07	0	0	0	0	0	0	0	0	0	0	0	0	0	0	0	11.9553	0	0	11.184	4.2422	TCGA-OR-A5KV	ACC	17	FEMALE	WHITE	Stage III	[Not Applicable]	Adrenocortical carcinoma- Usual Type	[Not Available]	2003	[Not Available]	-6250	Alive	TUMOR FREE	3878	#N/A	[Not Available]	Distant Metastasis	Lung	#N/A	1116	Complete Remission/Response	#N/A	#N/A	0	3878	0	3878	1
TCGA-OR-A5KW-01A-11R-A29S-07	0	0.5562	0	0	0	10.401	11.0652	1.7443	0	0	2.7001	0	0	0	0	0	0	0	5.9403	1.6201	TCGA-OR-A5KW	ACC	55	FEMALE	WHITE	Stage III	[Not Applicable]	Adrenocortical carcinoma- Usual Type	[Not Available]	2009	[Not Available]	-20328	Alive	TUMOR FREE	2076	#N/A	[Not Available]	#N/A	#N/A	#N/A	#N/A	Complete Remission/Response	#N/A	#N/A	0	2076	0	2076	0
TCGA-OR-A5KX-01A-11R-A29S-07	0	0	0	0	0	1.912	0	0	0	0	0	0	0	0	0	0	0	0	5.2581	0	TCGA-OR-A5KX	ACC	25	FEMALE	WHITE	Stage III	[Not Applicable]	Adrenocortical carcinoma- Usual Type	[Not Available]	2010	[Not Available]	-9298	Alive	WITH TUMOR	1364	#N/A	[Not Available]	Distant Metastasis	Bone	#N/A	62	Progressive Disease	#N/A	#N/A	0	1364	0	1364	#N/A
TCGA-OR-A5KY-01A-11R-A29S-07	0	0	0	0	0	0	0	0	0	0	0.8854	0	0.8854	0	0	0	0	0.4427	26.5634	1.3282	TCGA-OR-A5KY	ACC	23	FEMALE	WHITE	Stage IV	[Not Applicable]	Adrenocortical carcinoma- Usual Type	[Not Available]	2010	[Not Available]	-8745	Dead	WITH TUMOR	#N/A	391	[Not Available]	Locoregional Recurrence	Peritoneal Surfaces	#N/A	178	Progressive Disease	#N/A	#N/A	1	391	1	391	#N/A
TCGA-OR-A5KZ-01A-11R-A29S-07	0.6061	0	0	0	0	0	1.2121	0	0	0.6061	2.4242	0	0	0	0	0.6061	0	0	98.7879	0.6061	TCGA-OR-A5KZ	ACC	42	MALE	WHITE	Stage II	[Not Applicable]	Adrenocortical carcinoma- Usual Type	[Not Available]	2012	[Not Available]	-15594	Dead	WITH TUMOR	#N/A	125	[Not Available]	Locoregional Recurrence	Other, specify	abdomen	36	Progressive Disease	#N/A	#N/A	1	125	1	125	#N/A
TCGA-OR-A5L3-01A-11R-A29S-07	0	0	0	0	0	7.8125	2.2321	0	0	0	0	0	0	0	0	0	0	0	0	2.2321	TCGA-OR-A5L3	ACC	67	FEMALE	WHITE	Stage I	[Not Applicable]	Adrenocortical carcinoma- Usual Type	[Not Available]	2000	[Not Available]	-24763	Alive	TUMOR FREE	4628	#N/A	[Not Available]	#N/A	#N/A	#N/A	#N/A	Complete Remission/Response	#N/A	#N/A	0	4628	0	4628	0
TCGA-OR-A5L4-01A-11R-A29S-07	6.9232	0	0	0	0	35.368	90.2784	2.2061	0	0.7093	5.6748	0	0	0	0	0	0	0	0	0	TCGA-OR-A5L4	ACC	48	FEMALE	WHITE	Stage III	[Not Applicable]	Adrenocortical carcinoma- Usual Type	[Not Available]	2011	[Not Available]	-17819	Alive	TUMOR FREE	967	#N/A	[Not Available]	#N/A	#N/A	#N/A	#N/A	Complete Remission/Response	#N/A	#N/A	0	967	0	967	0
TCGA-OR-A5L5-01A-11R-A29S-07	19.6668	0	1.9224	0	0	1817.99	1474.28	0.9011	68.0885	1.0923	0	0.5461	0	0.5461	0	0	1.0923	0	48.6073	0.5461	TCGA-OR-A5L5	ACC	77	FEMALE	WHITE	Stage I	[Not Applicable]	Adrenocortical carcinoma- Usual Type	[Not Available]	2010	[Not Available]	-28270	Alive	TUMOR FREE	1317	#N/A	[Not Available]	#N/A	#N/A	#N/A	#N/A	Complete Remission/Response	#N/A	#N/A	0	1317	0	1317	0
TCGA-OR-A5L6-01A-11R-A29S-07	0	0	0	0	0	101.121	0	0	37.1963	1.8692	1.8692	0	0	0	0	0	0	0	52.3364	7.4766	TCGA-OR-A5L6	ACC	60	MALE	WHITE	Stage II	[Not Applicable]	Adrenocortical carcinoma- Usual Type	[Not Available]	2011	[Not Available]	-22057	Alive	TUMOR FREE	861	#N/A	[Not Available]	#N/A	#N/A	#N/A	#N/A	Complete Remission/Response	#N/A	#N/A	0	861	0	861	0
TCGA-OR-A5L8-01A-11R-A29S-07	0	0	0	0	0	1.5962	0	0	0	0	0	0	0	0	0	0	0	0	0.399	0	TCGA-OR-A5L8	ACC	36	FEMALE	WHITE	Stage II	[Not Applicable]	Adrenocortical carcinoma- Usual Type	[Not Available]	2011	[Not Available]	-13472	Alive	TUMOR FREE	885	#N/A	[Not Available]	#N/A	#N/A	#N/A	#N/A	Complete Remission/Response	#N/A	#N/A	0	885	0	885	0
TCGA-OR-A5L9-01A-11R-A29S-07	0	0	0	0	0	198.925	0	0	0	0	0	0	0	0	0	0	0	0	5.3763	0	TCGA-OR-A5L9	ACC	53	FEMALE	WHITE	Stage II	[Not Applicable]	Adrenocortical carcinoma- Usual Type	[Not Available]	2011	[Not Available]	-19526	Alive	TUMOR FREE	871	#N/A	[Not Available]	#N/A	#N/A	#N/A	#N/A	Complete Remission/Response	#N/A	#N/A	0	871	0	871	0
TCGA-OR-A5LA-01A-11R-A29S-07	0	0	0	0	0	5.3239	0	0	0	0	0	0	0.8873	0	0	2.6619	0	0.8873	14.197	0	TCGA-OR-A5LA	ACC	52	FEMALE	WHITE	Stage II	[Not Applicable]	Adrenocortical carcinoma- Usual Type	[Not Available]	2012	[Not Available]	-19242	Alive	TUMOR FREE	719	#N/A	[Not Available]	#N/A	#N/A	#N/A	#N/A	Complete Remission/Response	#N/A	#N/A	0	719	0	719	0
TCGA-OR-A5LB-01A-11R-A29S-07	0	0	0	0	0	0	0.9325	0	0	0	0	0	0	0	0	0	0	0	0.4663	0.9325	TCGA-OR-A5LB	ACC	59	MALE	WHITE	Stage IV	[Not Applicable]	Adrenocortical carcinoma- Usual Type	[Not Available]	2006	[Not Available]	-21565	Dead	WITH TUMOR	#N/A	1204	[Not Available]	Distant Metastasis	Liver	#N/A	611	Progressive Disease	#N/A	#N/A	1	1204	1	1204	#N/A
TCGA-OR-A5LC-01A-11R-A29S-07	0	0	0	0	0	0.6784	0	0	0	0	0	0	0.6784	0	0	0	0	0	0.6784	0	TCGA-OR-A5LC	ACC	71	FEMALE	WHITE	Stage IV	[Not Applicable]	Adrenocortical carcinoma- Usual Type	[Not Available]	2011	[Not Available]	-26084	Dead	WITH TUMOR	#N/A	159	[Not Available]	Distant Metastasis	Lung	#N/A	50	Progressive Disease	#N/A	#N/A	1	159	1	159	#N/A
TCGA-OR-A5LD-01A-11R-A29S-07	0	0	0	0	0	0	0	0	0	0	0	0	0	0	0	0	0	0	5.4274	0	TCGA-OR-A5LD	ACC	52	MALE	WHITE	Stage III	[Not Applicable]	Adrenocortical carcinoma- Usual Type	[Not Available]	1998	[Not Available]	-19111	Dead	WITH TUMOR	#N/A	1197	[Not Available]	Distant Metastasis	Lung	#N/A	444	[Unknown]	#N/A	#N/A	1	1197	1	1197	#N/A
TCGA-OR-A5LE-01A-11R-A29S-07	0	0.695	0	0	0	9.6868	0	1.0886	2.0542	0	0	0	0	0	0	1.8451	0.615	0.615	1.8451	0	TCGA-OR-A5LE	ACC	14	MALE	WHITE	Stage II	[Not Applicable]	Adrenocortical carcinoma- Usual Type	[Not Available]	1997	[Not Available]	-5383	Dead	WITH TUMOR	#N/A	662	[Not Available]	Locoregional Recurrence	Peritoneal Surfaces	#N/A	265	[Unknown]	#N/A	#N/A	1	662	1	662	#N/A
TCGA-OR-A5LH-01A-11R-A29S-07	0	3.0148	0	0	0	81.218	86.9234	0	8.9887	2.7786	1.3893	0	2.3155	0	0	31.0275	0	0	21.7656	0.9262	TCGA-OR-A5LH	ACC	36	FEMALE	WHITE	Stage II	[Not Applicable]	Adrenocortical carcinoma- Usual Type	[Not Available]	2005	[Not Available]	-13182	Dead	WITH TUMOR	#N/A	2385	[Not Available]	#N/A	#N/A	#N/A	#N/A	Progressive Disease	#N/A	#N/A	1	2385	1	2385	#N/A
TCGA-OR-A5LJ-01A-11R-A29S-07	0	0	0	0	0	1.0068	0	0	0	0.5034	0	0	0	0.5034	0	0	0	0	0	0.5034	TCGA-OR-A5LJ	ACC	54	FEMALE	WHITE	Stage IV	[Not Applicable]	Adrenocortical carcinoma- Usual Type	[Not Available]	2005	[Not Available]	-20069	Dead	WITH TUMOR	#N/A	1105	[Not Available]	Distant Metastasis	Lung	#N/A	98	Progressive Disease	#N/A	#N/A	1	1105	1	1105	#N/A
TCGA-OR-A5LK-01A-11R-A29S-07	0	34.7119	0	0	0	1449.61	370.288	15.661	90.7458	3.3898	206.78	0	5.0847	0	0	5.0847	3.3898	0	1.6949	0	TCGA-OR-A5LK	ACC	62	MALE	[Not Evaluated]	Stage II	[Not Applicable]	Adrenocortical Carcinoma- Oncocytic Type	[Not Available]	2007	[Not Available]	-22919	Alive	TUMOR FREE	2740	#N/A	[Not Available]	#N/A	#N/A	#N/A	#N/A	Complete Remission/Response	#N/A	#N/A	0	2740	0	2740	0
TCGA-OR-A5LL-01A-11R-A29S-07	37.2843	0	1.962	0	0	130.115	388.587	5.5929	33.432	0	0	0	0	0	0	0	0	0	5.9818	0	TCGA-OR-A5LL	ACC	75	FEMALE	[Not Evaluated]	Stage II	[Not Applicable]	Adrenocortical carcinoma- Usual Type	[Not Available]	2007	[Not Available]	-27607	Dead	WITH TUMOR	#N/A	1613	[Not Available]	Distant Metastasis	Liver	#N/A	213	Complete Remission/Response	#N/A	#N/A	1	1613	1	1613	1
TCGA-OR-A5LM-01A-11R-A29S-07	0	0	0	0	0	8.3806	4.8267	0	0	0	1.801	0	0	0	0	0	0	292.961	118.265	0	TCGA-OR-A5LM	ACC	23	MALE	[Not Evaluated]	Stage II	[Not Applicable]	Adrenocortical carcinoma- Usual Type	[Not Available]	2008	[Not Available]	-8735	Alive	TUMOR FREE	1858	#N/A	[Not Available]	#N/A	#N/A	#N/A	#N/A	Complete Remission/Response	#N/A	#N/A	0	1858	0	1858	0
TCGA-OR-A5LN-01A-11R-A29S-07	51.422	7.6185	0	0	0	2840.2	547.711	34.1272	120.093	0	11.5607	0	3.6532	0	0	1.1561	0	1.1561	0	0	TCGA-OR-A5LN	ACC	31	FEMALE	[Not Evaluated]	Stage II	[Not Applicable]	Adrenocortical carcinoma- Usual Type	[Not Available]	2008	[Not Available]	-11414	Alive	TUMOR FREE	2342	#N/A	[Not Available]	#N/A	#N/A	#N/A	#N/A	Complete Remission/Response	#N/A	#N/A	0	2342	0	2342	0
TCGA-OR-A5LO-01A-11R-A29S-07	0	0	0	0	0	0.0817	4.7237	0	0	0	0	0	1.9222	0	0	0	0	0.4805	38.9236	0.9611	TCGA-OR-A5LO	ACC	61	FEMALE	[Not Evaluated]	Stage II	[Not Applicable]	Adrenocortical carcinoma- Usual Type	[Not Available]	2008	[Not Available]	-22370	Dead	WITH TUMOR	#N/A	2405	[Not Available]	Distant Metastasis	Lung	#N/A	153	Complete Remission/Response	#N/A	#N/A	1	2405	1	2405	1
TCGA-OR-A5LP-01A-11R-A29S-07	21.011	71.3324	0	0	0	946.547	6729.16	11.0851	116.171	1.763	4.4076	0	0	0	0	0.4408	0	0	0.8815	0.8815	TCGA-OR-A5LP	ACC	37	FEMALE	[Not Evaluated]	Stage II	[Not Applicable]	Adrenocortical carcinoma- Usual Type	[Not Available]	2009	[Not Available]	-13574	Alive	TUMOR FREE	1857	#N/A	[Not Available]	#N/A	#N/A	#N/A	#N/A	Complete Remission/Response	#N/A	#N/A	0	1857	0	1857	0
TCGA-OR-A5LR-01A-11R-A29S-07	0	0	0	0	0	9.4895	5.4393	0	2.6444	0	1.6736	0	0	0	0.8368	0.8368	0	0	123.849	0	TCGA-OR-A5LR	ACC	30	FEMALE	[Not Evaluated]	Stage II	[Not Applicable]	Adrenocortical carcinoma- Usual Type	[Not Available]	2011	[Not Available]	-11261	Alive	TUMOR FREE	853	#N/A	[Not Available]	#N/A	#N/A	#N/A	#N/A	Complete Remission/Response	#N/A	#N/A	0	853	0	853	0
TCGA-OR-A5LS-01A-11R-A29S-07	0	0	0	0	0	0.6776	0	0	0	0	0.6776	0	0	0	0	0	0	0	2.0329	4.0657	TCGA-OR-A5LS	ACC	34	FEMALE	[Not Evaluated]	Stage II	[Not Applicable]	Adrenocortical carcinoma- Usual Type	[Not Available]	2011	[Not Available]	-12663	Alive	TUMOR FREE	1096	#N/A	[Not Available]	#N/A	#N/A	#N/A	#N/A	Complete Remission/Response	#N/A	#N/A	0	1096	0	1096	0
TCGA-OR-A5LT-01A-11R-A29S-07	0.0255	11.131	0	0	0	600.672	520.068	0	18.6139	7.6531	293.367	0	1.7007	1.7007	0	0.8503	0.8503	1.7007	19.5578	17.8571	TCGA-OR-A5LT	ACC	57	MALE	[Not Evaluated]	Stage III	[Not Applicable]	Adrenocortical carcinoma- Usual Type	[Not Available]	2012	[Not Available]	-21032	Alive	TUMOR FREE	549	#N/A	[Not Available]	#N/A	#N/A	#N/A	#N/A	Complete Remission/Response	#N/A	#N/A	0	549	0	549	0
TCGA-OU-A5PI-01A-12R-A29S-07	0	0	0	0	0	2.2805	0	0	0	0	0.5701	0	0	0	0	0	0	0.5701	82.6682	12.5428	TCGA-OU-A5PI	ACC	53	FEMALE	WHITE	Stage IV	[Not Applicable]	Adrenocortical carcinoma- Usual Type	[Not Available]	2011	[Not Available]	-19492	Alive	WITH TUMOR	1171	#N/A	[Not Available]	Distant Metastasis	Lung	#N/A	351	Stable Disease	#N/A	#N/A	0	1171	0	1171	#N/A
TCGA-P6-A5OF-01A-11R-A29S-07	0	0	0	0	0	0.5749	5.2914	0	0	0	0.3911	0	0	0	0	0	0.3911	0	4.693	2.3465	TCGA-P6-A5OF	ACC	55	FEMALE	WHITE	Stage III	[Not Applicable]	Adrenocortical carcinoma- Usual Type	[Not Available]	2010	[Not Available]	-20106	Dead	WITH TUMOR	#N/A	207	[Not Available]	Distant Metastasis	Lung	#N/A	143	[Unknown]	#N/A	#N/A	1	207	1	207	#N/A
TCGA-P6-A5OG-01A-22R-A29S-07	0.4335	0	0	0	0	0	0	0	0	0	0	0	0	0	0	0	0	0	2.1673	104.898	TCGA-P6-A5OG	ACC	45	FEMALE	WHITE	Stage IV	[Not Applicable]	Adrenocortical carcinoma- Usual Type	[Not Available]	2011	[Not Available]	-16659	Dead	WITH TUMOR	#N/A	383	[Not Available]	Distant Metastasis	Lung	#N/A	11	Complete Remission/Response	#N/A	#N/A	1	383	1	383	#N/A
TCGA-PA-A5YG-01A-11R-A29S-07	5.8669	0	0	0	0	183.245	756.713	10.7397	41.5858	1.387	0.4623	0	0	1.387	0	0	0	0	0.4623	5.0855	TCGA-PA-A5YG	ACC	51	MALE	WHITE	Stage II	[Not Applicable]	Adrenocortical carcinoma- Usual Type	[Not Available]	2012	[Not Available]	-18926	Alive	TUMOR FREE	756	#N/A	[Not Available]	#N/A	#N/A	#N/A	#N/A	Complete Remission/Response	#N/A	#N/A	0	756	0	756	0
TCGA-PK-A5H8-01A-11R-A29S-07	0	0	0	0	0	7.8826	4.6096	0	0	0	1.8738	0	0	0	0	0	0	0	4.3723	0	TCGA-PK-A5H8	ACC	42	MALE	WHITE	Stage II	[Not Applicable]	Adrenocortical carcinoma- Usual Type	[Not Available]	2004	[Not Available]	-15373	Alive	TUMOR FREE	3623	#N/A	[Not Available]	#N/A	#N/A	#N/A	#N/A	Complete Remission/Response	#N/A	#N/A	0	3623	0	3623	0
TCGA-PK-A5H9-01A-11R-A29S-07	1.4307	0	9.6694	0	0	12.3144	83.3953	0.9282	19.6284	0.3489	6794.03	0	0	0	0	54.0871	51.6444	5.5832	4.5363	56.1808	TCGA-PK-A5H9	ACC	27	FEMALE	ASIAN	Stage II	[Not Applicable]	Adrenocortical carcinoma- Usual Type	[Not Available]	2012	[Not Available]	-10173	Alive	TUMOR FREE	616	#N/A	[Not Available]	#N/A	#N/A	#N/A	#N/A	Complete Remission/Response	#N/A	#N/A	0	616	0	616	0
TCGA-PK-A5HA-01A-11R-A29S-07	6.3341	0	0	0	0	70.3032	179.151	0	1.6483	3.8589	332.966	0	22.8115	1.1025	8.269	1.6538	3.3076	0	0	2.2051	TCGA-PK-A5HA	ACC	63	MALE	[Unknown]	Stage I	[Not Applicable]	Adrenocortical carcinoma- Usual Type	[Not Available]	2011	[Not Available]	-23345	Alive	TUMOR FREE	1201	#N/A	[Not Available]	#N/A	#N/A	#N/A	#N/A	Complete Remission/Response	#N/A	#N/A	0	1201	0	1201	0
TCGA-PK-A5HB-01A-11R-A29S-07	0	0	0	0	0	0	0	0	0	0.8019	142.342	0	2.8067	0	0	0.401	0	0	0.401	6.4154	TCGA-PK-A5HB	ACC	63	MALE	[Unknown]	[Not Available]	[Not Applicable]	Adrenocortical carcinoma- Usual Type	[Not Available]	2003	[Not Available]	-23293	Alive	WITH TUMOR	1293	#N/A	[Not Available]	Distant Metastasis	Lung	#N/A	213	[Not Available]	#N/A	#N/A	0	1293	0	1293	#N/A
[truncated: 6 more columns]

## Sheet: BLCA
gene_id	UGT1A10|54575	UGT1A1|54658	UGT1A3|54659	UGT1A4|54657	UGT1A5|54579	UGT1A6|54578	UGT1A7|54577	UGT1A8|54576	UGT1A9|54600	UGT2A1|10941	UGT2A3|79799	UGT2B10|7365	UGT2B11|10720	UGT2B15|7366	UGT2B28|54490	UGT2B4|7363	UGT2B7|7364	UGT3A1|133688	UGT3A2|167127	UGT8|7368	bcr_patient_barcode	type	age_at_initial_pathologic_diagnosis	gender	race	ajcc_pathologic_tumor_stage	clinical_stage	histological_type	histological_grade	initial_pathologic_dx_year	menopause_status	birth_days_to	vital_status	tumor_status	last_contact_days_to	death_days_to	cause_of_death	new_tumor_event_type	new_tumor_event_site	new_tumor_event_site_other	new_tumor_event_dx_days_to	treatment_outcome_first_course	margin_status	residual_tumor	OS	OS.time	DSS	DSS.time	DFI
TCGA-DK-A6B1-01A-12R-A30C-07	12.3654	87.638	2.0411	0	0	205.555	0	0	12.1045	0	1855.48	11.2293	2.3119	17731.1	0.9908	0.3303	941.94	0	32.3668	15.5228	TCGA-DK-A6B1	BLCA	67	MALE	WHITE	Stage II	[Not Applicable]	Muscle invasive urothelial carcinoma (pT2 or above)	High Grade	2007	[Not Available]	-24607	Alive	TUMOR FREE	2049	#N/A	[Not Available]	#N/A	#N/A	#N/A	#N/A	Complete Remission/Response	#N/A	#N/A	0	2049	0	2049	0
TCGA-XF-A8HC-01A-11R-A36F-07	2292.41	807.057	2.1264	2.0553	2.1264	2454.39	4.3062	614.334	412.514	0	2.3693	1.1846	4.8925	6694.38	1.1846	1.1846	289.644	0	0	0.5923	TCGA-XF-A8HC	BLCA	79	MALE	ASIAN	Stage IV	[Not Applicable]	Muscle invasive urothelial carcinoma (pT2 or above)	High Grade	2005	[Not Available]	-28996	Dead	#N/A	#N/A	200	[Not Available]	#N/A	#N/A	#N/A	#N/A	[Unknown]	#N/A	#N/A	1	200	#N/A	200	#N/A
TCGA-GU-A42P-01A-11R-A23W-07	1013.25	105.557	7.8341	1.9063	1.9569	388.885	0	42.9639	62.7264	1.2666	30.7156	5.0665	99.4744	4196.96	0	0.95	23.1159	0.95	627.612	89.9303	TCGA-GU-A42P	BLCA	72	MALE	WHITE	Stage IV	[Not Applicable]	Muscle invasive urothelial carcinoma (pT2 or above)	High Grade	2012	[Not Available]	-26546	Dead	TUMOR FREE	#N/A	332	[Not Available]	#N/A	#N/A	#N/A	#N/A	Stable Disease	#N/A	#N/A	1	332	0	332	#N/A
TCGA-GV-A3QI-01A-11R-A220-07	2882.79	2506.04	13.9506	2.0802	2.1148	5965.1	25.542	15.2152	687.314	34.8034	34.8034	4.7821	91.1743	2434.11	1.3284	0	990.967	0	3.1881	760.627	TCGA-GV-A3QI	BLCA	47	MALE	WHITE	Stage III	[Not Applicable]	Muscle invasive urothelial carcinoma (pT2 or above)	High Grade	2011	[Not Available]	-17383	Alive	WITH TUMOR	1110	#N/A	[Not Available]	Distant Metastasis	Other, specify	Abdominal wall	768	Complete Remission/Response	#N/A	#N/A	0	1110	0	1110	1
TCGA-DK-A1AD-01A-11R-A13Y-07	3724.12	2.3865	4.8446	5.8566	1.2112	2521.35	2.4542	50.4303	347.904	3.5857	11262.9	6.7729	2.3904	2359.76	7.1713	42.2311	892.43	0	70.5179	54.1833	TCGA-DK-A1AD	BLCA	69	MALE	WHITE	Stage IV	[Not Applicable]	Muscle invasive urothelial carcinoma (pT2 or above)	High Grade	2002	[Not Available]	-25317	Alive	TUMOR FREE	3420	#N/A	[Not Available]	#N/A	#N/A	#N/A	#N/A	[Not Available]	#N/A	#N/A	0	3420	0	3420	#N/A
TCGA-E7-A4IJ-01A-31R-A26T-07	3005.36	185.905	4.9452	0	1.9463	4824.41	2.9825	44.216	447.785	0	8.2237	4.9342	0	2103.07	3.2895	0	364.583	0	268.64	119.517	TCGA-E7-A4IJ	BLCA	56	MALE	ASIAN	Stage II	[Not Applicable]	Muscle invasive urothelial carcinoma (pT2 or above)	High Grade	2012	[Not Available]	-20723	Dead	WITH TUMOR	#N/A	674	[Not Available]	Distant Metastasis	Bone	#N/A	620	Complete Remission/Response	#N/A	#N/A	1	674	1	674	1
TCGA-GV-A3QF-01A-31R-A22U-07	9387.94	793.688	29.422	11.4408	7.3555	9348.34	108.678	117.822	1303.64	0	5.2437	6.1971	30.2324	1594.09	24.3118	0.4767	356.572	0	0.9534	0	TCGA-GV-A3QF	BLCA	79	MALE	WHITE	Stage IV	[Not Applicable]	Muscle invasive urothelial carcinoma (pT2 or above)	High Grade	2011	[Not Available]	-28890	Dead	TUMOR FREE	#N/A	617	[Not Available]	#N/A	#N/A	#N/A	#N/A	Stable Disease	#N/A	#N/A	1	617	0	617	#N/A
TCGA-ZF-AA4X-01A-11R-A38B-07	70.051	214.247	7.1596	3.4817	1.1926	2116.08	0	263.704	158.703	0.8004	99.6498	4.4022	0.8004	1531.97	6.003	3.2016	259.73	2.8014	4.8024	7.2036	TCGA-ZF-AA4X	BLCA	56	MALE	WHITE	Stage II	[Not Applicable]	Muscle invasive urothelial carcinoma (pT2 or above)	High Grade	2009	[Not Available]	-20579	Alive	WITH TUMOR	2044	#N/A	[Not Available]	Locoregional (Urothelial tumor event)	Bladder	#N/A	1665	Complete Remission/Response	#N/A	#N/A	0	2044	0	2044	1
TCGA-MV-A51V-01A-11R-A26T-07	2322.24	1688.85	2.091	0	0	2886.4	0	41.6113	385.984	0	2.46	0.615	0.615	1416.36	0	0	88.5609	0	16.6052	34.4403	TCGA-MV-A51V	BLCA	75	MALE	WHITE	Stage III	[Not Applicable]	Muscle invasive urothelial carcinoma (pT2 or above)	High Grade	2012	[Not Available]	-27430	Alive	TUMOR FREE	410	#N/A	[Not Available]	#N/A	#N/A	#N/A	#N/A	Complete Remission/Response	#N/A	#N/A	0	410	0	410	0
TCGA-4Z-AA7R-01A-11R-A39I-07	4617.41	500.774	20.7076	9.3814	3.9831	10031.9	0	23.1598	852.799	2.2252	1.3351	0	0.445	1406.76	0.445	2.6702	1.7802	0	0.8901	22.6969	TCGA-4Z-AA7R	BLCA	73	MALE	BLACK OR AFRICAN AMERICAN	Stage IV	[Not Applicable]	Muscle invasive urothelial carcinoma (pT2 or above)	High Grade	2010	[Not Available]	-26781	Dead	WITH TUMOR	#N/A	522	[Not Available]	Locoregional (Urothelial tumor event)	Lymph Node Only	#N/A	353	Partial Remission/Response	#N/A	#N/A	1	522	1	522	#N/A
TCGA-GV-A3JX-01A-11R-A20F-07	148.546	198.543	2.9253	0	0.4885	1138.9	4.8968	15.6557	66.0832	0	7.8511	24.7165	0.4071	1356.21	1.4539	19.1916	224.484	0.2908	16.5746	626.926	TCGA-GV-A3JX	BLCA	59	MALE	WHITE	Stage III	[Not Applicable]	Muscle invasive urothelial carcinoma (pT2 or above)	High Grade	2011	[Not Available]	-21888	Alive	TUMOR FREE	581	#N/A	[Not Available]	#N/A	#N/A	#N/A	#N/A	Complete Remission/Response	#N/A	#N/A	0	581	0	581	0
TCGA-DK-A3IV-01A-22R-A21D-07	1842.75	37.0241	5.6263	3.6392	3.7499	401.038	4.7522	934.221	210.292	1.1655	12.5288	0.5827	1.7482	1236.56	7.5756	7.5756	23.018	0.8741	56.234	18.0648	TCGA-DK-A3IV	BLCA	60	MALE	WHITE	Stage II	[Not Applicable]	Muscle invasive urothelial carcinoma (pT2 or above)	High Grade	2011	[Not Available]	-22237	Dead	WITH TUMOR	#N/A	294	[Not Available]	Locoregional (Urothelial tumor event)	Lymph Node Only	#N/A	212	Stable Disease	#N/A	#N/A	1	294	1	294	#N/A
TCGA-DK-AA6P-01A-11R-A39I-07	6245.8	1562.57	12.1988	1.696	0	1760.38	0	48.1753	471.34	0.5635	0	0	10.0295	1030.56	118.889	0	12.9594	0	2.2538	6.7614	TCGA-DK-AA6P	BLCA	72	FEMALE	WHITE	Stage II	[Not Applicable]	Muscle invasive urothelial carcinoma (pT2 or above)	High Grade	2013	[Not Available]	-26560	Alive	TUMOR FREE	457	#N/A	[Not Available]	Distant Metastasis	Bone	#N/A	16	Partial Remission/Response	#N/A	#N/A	0	457	0	457	#N/A
TCGA-DK-AA6X-01A-12R-A42T-07	1307.31	4.1287	5.3846	2.606	0	744.725	0	46.0675	128.407	2.3548	1.5699	1.5699	0	741.758	0.7849	0	323.391	0	92.6217	17.2684	TCGA-DK-AA6X	BLCA	63	MALE	WHITE	Stage II	[Not Applicable]	Muscle invasive urothelial carcinoma (pT2 or above)	High Grade	2013	[Not Available]	-23208	Alive	TUMOR FREE	467	#N/A	[Not Available]	#N/A	#N/A	#N/A	#N/A	Progressive Disease	#N/A	#N/A	0	467	0	467	#N/A
TCGA-FD-A3SJ-01A-12R-A22U-07	1927.83	132.608	0.9505	0	0	784.631	2.8903	17.2071	207.721	0	0	0.8995	1.1993	741.174	15.591	0	4.7972	1.1993	15.2912	8.3952	TCGA-FD-A3SJ	BLCA	59	MALE	WHITE	Stage IV	[Not Applicable]	Muscle invasive urothelial carcinoma (pT2 or above)	High Grade	2010	[Not Available]	-21615	Dead	WITH TUMOR	#N/A	739	[Not Available]	Distant Metastasis	Lymph Node Only	#N/A	281	[Not Applicable]	#N/A	#N/A	1	739	1	739	#N/A
TCGA-DK-AA6U-01A-11R-A39I-07	89.9187	242.652	6.1655	1.2121	1.2331	3276.36	2.4802	10.1801	139.537	0.7006	2.8025	0	5.2547	730.756	0	0.3503	88.9799	0	50.095	158.692	TCGA-DK-AA6U	BLCA	64	MALE	WHITE	Stage II	[Not Applicable]	Muscle invasive urothelial carcinoma (pT2 or above)	[Unknown]	2013	[Not Available]	-23611	Alive	TUMOR FREE	578	#N/A	[Not Available]	#N/A	#N/A	#N/A	#N/A	Complete Remission/Response	#N/A	#N/A	0	578	0	578	0
TCGA-DK-A6B6-01A-11R-A30C-07	7181.06	696.644	3.8535	5.611	7.7128	3193.42	136.783	104.471	700.462	2.375	0	0.5938	9.2447	654.909	27.9064	5.9375	7.125	0	30.2814	8.9063	TCGA-DK-A6B6	BLCA	57	MALE	WHITE	Stage II	[Not Applicable]	Muscle invasive urothelial carcinoma (pT2 or above)	High Grade	2011	[Not Available]	-21007	Alive	TUMOR FREE	1115	#N/A	[Not Available]	#N/A	#N/A	#N/A	#N/A	Complete Remission/Response	#N/A	#N/A	0	1115	0	1115	0
TCGA-DK-A1A7-01A-11R-A13Y-07	2797.66	419.939	16.1419	1.9444	0	8464.49	2.0422	96.6188	400.495	3.0572	0	0.6114	103.76	563.742	3.0572	0	10.3944	0	0.6114	11.0058	TCGA-DK-A1A7	BLCA	67	FEMALE	WHITE	Stage IV	[Not Applicable]	Muscle invasive urothelial carcinoma (pT2 or above)	High Grade	2010	[Not Available]	-24499	Alive	WITH TUMOR	560	#N/A	[Not Available]	Metastatic	Lung	#N/A	112	[Not Available]	#N/A	#N/A	0	560	0	560	#N/A
TCGA-E7-A7PW-01A-11R-A352-07	1423.22	364.232	17.4565	11.2491	20.3634	9994.16	17.6987	71.4232	764.519	4.542	1.514	5.299	1.0295	511.733	4.542	1.514	90.8403	6.056	34.0651	12.869	TCGA-E7-A7PW	BLCA	63	MALE	ASIAN	Stage III	[Not Applicable]	Muscle invasive urothelial carcinoma (pT2 or above)	High Grade	2013	[Not Available]	-23057	Alive	TUMOR FREE	416	#N/A	[Not Available]	Distant Metastasis	Bone	#N/A	174	Complete Remission/Response	#N/A	#N/A	0	416	0	416	1
TCGA-G2-AA3B-01A-11R-A39I-07	2752.41	498.11	9.2213	0	0	5782.99	3.1167	26.0833	1054.51	2.2104	195.625	8.105	13.0306	487.036	1.1052	25.4202	327.883	0.3684	41.6301	0.3684	TCGA-G2-AA3B	BLCA	75	FEMALE	WHITE	Stage II	[Not Applicable]	Muscle invasive urothelial carcinoma (pT2 or above)	High Grade	2009	[Not Available]	-27646	Alive	TUMOR FREE	2008	#N/A	[Not Available]	#N/A	#N/A	#N/A	#N/A	Complete Remission/Response	#N/A	#N/A	0	2008	0	2008	0
TCGA-K4-A3WS-01A-11R-A22U-07	1104.71	6.4457	1.633	1.585	0	1787.88	3.3093	6.2008	248.189	0	0.4803	0.4803	2.4015	454.851	3.8425	0	55.7157	0	0.4803	45.6292	TCGA-K4-A3WS	BLCA	66	MALE	WHITE	Stage III	[Not Applicable]	Muscle invasive urothelial carcinoma (pT2 or above)	High Grade	2011	[Not Available]	-24124	Alive	TUMOR FREE	761	#N/A	[Not Available]	#N/A	#N/A	#N/A	#N/A	Complete Remission/Response	#N/A	#N/A	0	761	0	761	0
TCGA-ZF-A9R4-01A-11R-A38B-07	5308.82	133.603	5.0861	3.7127	1.2726	459	3.8597	140.63	431.621	0	5.8799	0	4.4141	443.511	31.4994	2.5199	21.4196	0.42	11.7598	0.42	TCGA-ZF-A9R4	BLCA	83	MALE	WHITE	Stage II	[Not Applicable]	Muscle invasive urothelial carcinoma (pT2 or above)	High Grade	2012	[Not Available]	-30398	Alive	TUMOR FREE	921	#N/A	[Not Available]	#N/A	#N/A	#N/A	#N/A	Complete Remission/Response	#N/A	#N/A	0	921	0	921	0
TCGA-BT-A42C-01A-11R-A23N-07	231.065	472.26	1.1918	0.5829	1.1918	6226.09	28.1597	9.7773	456.449	0.3239	0.3239	0.3239	0.3239	405.797	10.0397	1.6193	72.8686	0	6.4772	29.7952	TCGA-BT-A42C	BLCA	64	MALE	WHITE	Stage II	[Not Applicable]	Muscle invasive urothelial carcinoma (pT2 or above)	High Grade	2011	[Not Available]	-23584	Alive	TUMOR FREE	873	#N/A	[Not Available]	#N/A	#N/A	#N/A	#N/A	Complete Remission/Response	#N/A	#N/A	0	873	0	873	0
TCGA-FD-A43U-01A-11R-A23W-07	2980.08	52.7024	4.5114	2.1707	0	10724.2	37.3491	10.621	1082.69	1.1335	1282.56	6.801	1.1335	370.657	13.6021	0	2155.36	1.7003	1.1335	15.3023	TCGA-FD-A43U	BLCA	70	MALE	WHITE	Stage IV	[Not Applicable]	Muscle invasive urothelial carcinoma (pT2 or above)	High Grade	2012	[Not Available]	-25841	Alive	WITH TUMOR	636	#N/A	[Not Available]	Distant Metastasis	Bone	#N/A	497	Complete Remission/Response	#N/A	#N/A	0	636	0	636	#N/A
TCGA-H4-A2HO-01A-11R-A180-07	173.427	34.7706	2.0041	0	2.0792	675.316	0	11.8052	33.7435	0	2023.49	22.5458	16.2831	337.561	0	0	109.598	0	1.8788	7.5153	TCGA-H4-A2HO	BLCA	53	MALE	WHITE	Stage III	[Not Applicable]	Muscle invasive urothelial carcinoma (pT2 or above)	High Grade	2010	[Not Available]	-19630	Alive	TUMOR FREE	46	#N/A	[Not Available]	#N/A	#N/A	#N/A	#N/A	Complete Remission/Response	#N/A	#N/A	0	46	0	46	0
TCGA-FD-A3SL-01A-21R-A22U-07	2998.21	1.5312	0	0	0	2059.26	0	19.1609	238.739	0	0.474	0	0	328.514	0	0	0.474	0	1.4221	1.8962	TCGA-FD-A3SL	BLCA	60	MALE	WHITE	Stage IV	[Not Applicable]	Muscle invasive urothelial carcinoma (pT2 or above)	High Grade	2011	[Not Available]	-22020	Dead	WITH TUMOR	#N/A	712	[Not Available]	Distant Metastasis	Lung	#N/A	260	Progressive Disease	#N/A	#N/A	1	712	1	712	#N/A
TCGA-UY-A78N-01A-12R-A33J-07	720.629	32.9189	5.1263	3.735	0	1349.36	1.2981	9.7474	273.62	23.3192	1.5546	1.9433	1.166	317.918	0	10.4936	7.7731	1.166	0	0.3887	TCGA-UY-A78N	BLCA	80	MALE	WHITE	Stage IV	[Not Applicable]	Muscle invasive urothelial carcinoma (pT2 or above)	High Grade	#N/A	[Not Available]	-29132	Dead	WITH TUMOR	#N/A	2641	[Not Available]	Distant Metastasis	Renal Pelvis	#N/A	2472	Complete Remission/Response	#N/A	#N/A	1	2641	1	2641	#N/A
TCGA-GV-A3JW-01A-11R-A20F-07	222.774	101.882	4.0479	0	0.5788	1477.46	0	3.3561	84.396	12.3286	2.3972	2.0548	15.1744	315.406	183.216	17.8079	37.3282	0	5.4794	1.0274	TCGA-GV-A3JW	BLCA	74	MALE	WHITE	Stage II	[Not Applicable]	Muscle invasive urothelial carcinoma (pT2 or above)	High Grade	2011	[Not Available]	-27091	Alive	WITH TUMOR	649	#N/A	[Not Available]	Distant Metastasis	Bone	#N/A	271	Stable Disease	#N/A	#N/A	0	649	0	649	#N/A
TCGA-CU-A5W6-01A-11R-A28M-07	2511.85	46.2538	4.1368	1.5679	2.4801	6190.53	57.3427	192.638	447.603	3.4514	0	6.9028	54.5323	294.849	14.7918	11.8334	71.9865	1.9722	8.8751	15.2848	TCGA-CU-A5W6	BLCA	70	MALE	WHITE	Stage III	[Not Applicable]	Muscle invasive urothelial carcinoma (pT2 or above)	High Grade	2012	[Not Available]	-25706	Dead	TUMOR FREE	#N/A	56	[Not Available]	#N/A	#N/A	#N/A	#N/A	Complete Remission/Response	#N/A	#N/A	1	56	0	56	0
TCGA-ZF-A9R5-01A-12R-A42T-07	0	343.06	16.1106	18.5346	20.5069	6881.73	0	1.4009	471.189	0	0.9217	0	0	276.037	2.3041	0	42.8571	0	2.3041	0	TCGA-ZF-A9R5	BLCA	59	MALE	WHITE	Stage III	[Not Applicable]	Muscle invasive urothelial carcinoma (pT2 or above)	High Grade	2011	[Not Available]	-21811	Alive	TUMOR FREE	1090	#N/A	[Not Available]	#N/A	#N/A	#N/A	#N/A	Complete Remission/Response	#N/A	#N/A	0	1090	0	1090	0
TCGA-ZF-AA51-01A-21R-A39I-07	7233.82	35.0716	10.9495	2.6526	0	5798.03	177.377	59.7212	1755.47	0	105.501	4.5215	5.8628	275.81	26.3753	9.7965	519.97	0	2.2607	0.7536	TCGA-ZF-AA51	BLCA	69	FEMALE	WHITE	Stage II	[Not Applicable]	Muscle invasive urothelial carcinoma (pT2 or above)	High Grade	2009	[Not Available]	-25484	Alive	TUMOR FREE	1714	#N/A	[Not Available]	#N/A	#N/A	#N/A	#N/A	Complete Remission/Response	#N/A	#N/A	0	1714	0	1714	0
TCGA-GV-A3QH-01A-11R-A220-07	8192.22	165.624	7.9175	1.9216	0.9905	983.093	86.1428	89.4891	371.364	0	1361.35	0	0.9374	265.271	0	0	0.3125	0	33.7447	42.1809	TCGA-GV-A3QH	BLCA	67	MALE	WHITE	Stage II	[Not Applicable]	Muscle invasive urothelial carcinoma (pT2 or above)	High Grade	2011	[Not Available]	-24681	Dead	TUMOR FREE	#N/A	258	[Not Available]	Locoregional (Urothelial tumor event)	Bladder	#N/A	125	Stable Disease	#N/A	#N/A	1	258	0	258	#N/A
TCGA-GD-A3OP-01A-21R-A220-07	126.296	411.64	15.8736	2.2768	0	1227.68	1.3917	1079.31	303.232	0.6104	0.6104	1.526	3.1192	250.877	16.7862	0.6104	40.5921	0	6.7145	0.9156	TCGA-GD-A3OP	BLCA	84	FEMALE	WHITE	Stage IV	[Not Applicable]	Muscle invasive urothelial carcinoma (pT2 or above)	High Grade	2011	[Not Available]	-30956	Alive	#N/A	64	#N/A	[Not Available]	#N/A	#N/A	#N/A	#N/A	[Unknown]	#N/A	#N/A	0	64	0	64	#N/A
TCGA-GD-A2C5-01A-12R-A180-07	5275.75	9.7771	2.8351	0	0	1615.39	64.6726	393.018	522.583	0	1.5995	0	0	231.53	0	0	32.3903	0.3999	0.3999	1.5995	TCGA-GD-A2C5	BLCA	53	FEMALE	WHITE	Stage IV	[Not Applicable]	Muscle invasive urothelial carcinoma (pT2 or above)	High Grade	2011	[Not Available]	-19498	Alive	WITH TUMOR	812	#N/A	[Not Available]	Metastatic	Lung	#N/A	214	Progressive Disease	#N/A	#N/A	0	812	0	812	#N/A
TCGA-XF-AAMJ-01A-11R-A42T-07	44.2723	424.678	20.5793	6.6618	0	9035.83	2.3099	1529.91	431.774	0	53.5844	1.4482	0	198.407	11.5858	0	99.9276	0	0.7241	0	TCGA-XF-AAMJ	BLCA	70	MALE	ASIAN	Stage III	[Not Applicable]	Muscle invasive urothelial carcinoma (pT2 or above)	High Grade	2006	[Not Available]	-25838	Dead	TUMOR FREE	#N/A	1670	[Not Available]	#N/A	#N/A	#N/A	#N/A	Complete Remission/Response	#N/A	#N/A	1	1670	0	1670	0
TCGA-XF-AAMX-01A-11R-A42T-07	6.6825	2.1746	2.4497	0	0	265.349	0	1.4339	12.381	0	2.1164	0.5291	0	186.773	0.5291	1.0582	55.5556	0	0	0	TCGA-XF-AAMX	BLCA	87	FEMALE	BLACK OR AFRICAN AMERICAN	Stage III	[Not Applicable]	Muscle invasive urothelial carcinoma (pT2 or above)	High Grade	2006	[Not Available]	-31884	Dead	TUMOR FREE	#N/A	206	[Not Available]	#N/A	#N/A	#N/A	#N/A	Complete Remission/Response	#N/A	#N/A	1	206	0	206	0
TCGA-FD-A43P-01A-31R-A23W-07	3.254	339.803	34.717	1.0559	1.0835	4164.83	0	1.0352	384.869	0.6901	1.3803	2.0704	0.3451	181.85	2.4155	0	244.996	0.6901	63.4921	112.491	TCGA-FD-A43P	BLCA	74	MALE	BLACK OR AFRICAN AMERICAN	Stage II	[Not Applicable]	Muscle invasive urothelial carcinoma (pT2 or above)	High Grade	2012	[Not Available]	-27201	Alive	TUMOR FREE	832	#N/A	[Not Available]	#N/A	#N/A	#N/A	#N/A	Complete Remission/Response	#N/A	#N/A	0	832	0	832	0
TCGA-E7-A5KF-01A-11R-A28M-07	75.8863	7047.21	10.7647	3.1451	1.1843	15496.8	0	12.349	1023.65	0.3922	4.3137	0	5.8549	178.431	67.0588	0.3922	75.6863	0	22.7451	29.4118	TCGA-E7-A5KF	BLCA	67	MALE	ASIAN	Stage II	[Not Applicable]	Muscle invasive urothelial carcinoma (pT2 or above)	Low Grade	2012	[Not Available]	-24528	Alive	TUMOR FREE	20	#N/A	[Not Available]	#N/A	#N/A	#N/A	#N/A	[Not Available]	#N/A	#N/A	0	20	0	20	#N/A
TCGA-G2-A2EO-01A-11R-A180-07	2941.99	8.819	8.9659	0	0	6131.51	0.8418	309.205	814.454	1.9576	0.4894	1.4682	0	172.27	2.447	0.4894	258.405	0	0	0	TCGA-G2-A2EO	BLCA	69	MALE	WHITE	Stage III	[Not Applicable]	Muscle invasive urothelial carcinoma (pT2 or above)	High Grade	2009	[Not Available]	-25440	Dead	TUMOR FREE	#N/A	1804	[Not Available]	#N/A	#N/A	#N/A	#N/A	Complete Remission/Response	#N/A	#N/A	1	1804	0	1804	0
TCGA-UY-A9PE-01A-11R-A38B-07	0	27.57	12.4119	9.0334	0	4140.81	0	94.1192	221.021	0.9033	411.021	44.2638	0	168.022	0.9033	91.2376	481.481	11.7435	9.9368	0	TCGA-UY-A9PE	BLCA	86	MALE	WHITE	Stage IV	[Not Applicable]	Muscle invasive urothelial carcinoma (pT2 or above)	High Grade	#N/A	[Not Available]	-31755	Alive	WITH TUMOR	189	#N/A	[Not Available]	Distant Metastasis	Lung	#N/A	473	Complete Remission/Response	#N/A	#N/A	0	189	0	189	#N/A
TCGA-DK-AA6T-01A-11R-A39I-07	0	6.2731	5.9896	0	0	284.236	0	7.61	41.9618	0	0.5787	0	4.6296	149.306	4.0509	0	6.3657	0	0.5787	224.537	TCGA-DK-AA6T	BLCA	63	MALE	WHITE	Stage II	[Not Applicable]	Muscle invasive urothelial carcinoma (pT2 or above)	High Grade	2013	[Not Available]	-23198	Alive	TUMOR FREE	572	#N/A	[Not Available]	#N/A	#N/A	#N/A	#N/A	Complete Remission/Response	#N/A	#N/A	0	572	0	572	0
TCGA-G2-A3VY-01A-11R-A22U-07	0	119.179	6.0888	0.5396	0.5524	1108.16	0.5587	0	19.7031	0.9579	0.6386	0	1.5964	127.714	14.0485	0	1.9157	0.9579	8.94	32.567	TCGA-G2-A3VY	BLCA	66	MALE	ASIAN	Stage II	[Not Applicable]	Muscle invasive urothelial carcinoma (pT2 or above)	High Grade	2012	[Not Available]	-24112	Alive	WITH TUMOR	536	#N/A	[Not Available]	#N/A	#N/A	#N/A	#N/A	Stable Disease	#N/A	#N/A	0	536	0	536	#N/A
TCGA-K4-A4AB-01B-12R-A28M-07	14379	26.9332	11.1994	1.5466	0	2749.46	128.015	194	851.199	67.0338	0	0.9576	0	126.885	3.8305	7.661	16.7584	0	0.4788	6.7034	TCGA-K4-A4AB	BLCA	76	MALE	WHITE	Stage III	[Not Applicable]	Muscle invasive urothelial carcinoma (pT2 or above)	High Grade	2012	[Not Available]	-27922	Alive	#N/A	84	#N/A	[Not Available]	#N/A	#N/A	#N/A	#N/A	Partial Remission/Response	#N/A	#N/A	0	84	0	84	#N/A
TCGA-FD-A5BV-01A-11R-A26T-07	2159.07	2.679	0	0	0	2727.45	8.1999	676.173	401.623	0	3.5436	0	0.7087	124.734	0	0	18.4266	0	1.4174	1.4174	TCGA-FD-A5BV	BLCA	47	FEMALE	WHITE	Stage III	[Not Applicable]	Muscle invasive urothelial carcinoma (pT2 or above)	High Grade	2012	[Not Available]	-17501	Dead	WITH TUMOR	#N/A	163	[Not Available]	Locoregional (Urothelial tumor event)	Other, specify	Peritoneal carcinomatosis	134	Progressive Disease	#N/A	#N/A	1	163	1	163	#N/A
TCGA-4Z-AA80-01A-11R-A39I-07	787.157	1200.91	15.8499	0	2.5036	4282.97	0.8378	7.2785	355.758	27.6029	108.959	14.0436	6.0678	115.739	0.9685	4.3584	168.039	0	3.3898	24.2131	TCGA-4Z-AA80	BLCA	73	MALE	WHITE	Stage II	[Not Applicable]	Muscle invasive urothelial carcinoma (pT2 or above)	High Grade	2012	[Not Available]	-26873	Dead	TUMOR FREE	#N/A	19	[Not Available]	#N/A	#N/A	#N/A	#N/A	[Not Applicable]	#N/A	#N/A	1	19	0	19	#N/A
TCGA-GV-A6ZA-01A-12R-A33J-07	5009.65	1084.22	8.9289	1.7186	3.5686	6825.49	63.3982	48.6271	1066.37	0	2.4343	0	0	106.621	6.816	0	12.6582	0	12.1714	15.0925	TCGA-GV-A6ZA	BLCA	54	MALE	WHITE	Stage II	[Not Applicable]	Muscle invasive urothelial carcinoma (pT2 or above)	High Grade	2012	[Not Available]	-19871	Alive	TUMOR FREE	691	#N/A	[Not Available]	#N/A	#N/A	#N/A	#N/A	Complete Remission/Response	#N/A	#N/A	0	691	0	691	0
TCGA-CU-A3QU-01A-11R-A22U-07	17.8007	1062.26	12.9445	0	0	2895.18	0	0	179.936	2.2247	0.3178	0	0.3178	106.15	0	0	0	0	6.6741	0	TCGA-CU-A3QU	BLCA	58	MALE	WHITE	Stage IV	[Not Applicable]	Muscle invasive urothelial carcinoma (pT2 or above)	High Grade	2011	[Not Available]	-21233	Alive	TUMOR FREE	158	#N/A	[Not Available]	#N/A	#N/A	#N/A	#N/A	Complete Remission/Response	#N/A	#N/A	0	158	0	158	#N/A
TCGA-UY-A9PD-01A-11R-A38B-07	2249.77	17.7234	12.8174	4.9737	0	8592.82	0	26.8068	648.734	0.7513	1564.98	2.2539	0.7513	105.935	0.7513	6.7618	197.595	0	19.5341	0	TCGA-UY-A9PD	BLCA	80	MALE	WHITE	Stage III	[Not Applicable]	Muscle invasive urothelial carcinoma (pT2 or above)	High Grade	#N/A	[Not Available]	-29565	Alive	TUMOR FREE	542	#N/A	[Not Available]	#N/A	#N/A	#N/A	#N/A	Complete Remission/Response	#N/A	#N/A	0	542	0	542	0
TCGA-GU-A763-01A-11R-A32O-07	4341.44	687.247	10.0506	0	0	10027.6	44.6008	160.672	1657.83	1.623	0	0.4058	3.6518	103.062	63.7038	0.4058	84.8032	0	20.6936	0.4058	TCGA-GU-A763	BLCA	72	MALE	WHITE	Stage III	[Not Applicable]	Muscle invasive urothelial carcinoma (pT2 or above)	High Grade	2012	[Not Available]	-26527	Alive	WITH TUMOR	997	#N/A	[Not Available]	Distant Metastasis	Lung	#N/A	303	Stable Disease	#N/A	#N/A	0	997	0	997	#N/A
TCGA-DK-A3IK-01A-32R-A21D-07	1084.06	100.178	20.4866	2.2806	3.1508	6743.11	1.5947	4.4497	554.672	0.4287	13.289	0	0.4287	102.025	3.8581	2.5721	99.4534	0	1.286	1.286	TCGA-DK-A3IK	BLCA	87	MALE	WHITE	Stage IV	[Not Applicable]	Muscle invasive urothelial carcinoma (pT2 or above)	High Grade	2011	[Not Available]	-32076	Dead	TUMOR FREE	#N/A	146	[Not Available]	#N/A	#N/A	#N/A	#N/A	Complete Remission/Response	#N/A	#N/A	1	146	0	146	#N/A
TCGA-E7-A5KE-01A-11R-A28M-07	1.3122	15.1857	2.7215	0	0.7131	216.92	2.7511	96.0042	44.1435	0.4219	0	1.2658	3.2489	100.844	3.3755	31.6456	5.9072	0	1.2658	1.2658	TCGA-E7-A5KE	BLCA	78	FEMALE	ASIAN	Stage II	[Not Applicable]	Muscle invasive urothelial carcinoma (pT2 or above)	High Grade	2012	[Not Available]	-28714	Alive	TUMOR FREE	17	#N/A	[Not Available]	#N/A	#N/A	#N/A	#N/A	[Not Available]	#N/A	#N/A	0	17	0	17	#N/A
TCGA-E7-A6MF-01A-12R-A32O-07	26.2511	1.5959	0	0	0	269.765	0	13.1725	3.6996	0	0.4267	1.2801	53.0867	92.5956	10.6677	0.4267	41.3906	0	10.6677	223.168	TCGA-E7-A6MF	BLCA	37	MALE	ASIAN	Stage II	[Not Applicable]	Muscle invasive urothelial carcinoma (pT2 or above)	Low Grade	2013	[Not Available]	-13867	Alive	TUMOR FREE	750	#N/A	[Not Available]	#N/A	#N/A	#N/A	#N/A	Complete Remission/Response	#N/A	#N/A	0	750	0	750	0
TCGA-5N-A9KI-01A-31R-A42T-07	111.21	25.3203	5.646	0.7904	0	1679.88	0	11.7134	168.912	0.4343	38.2193	0	0	86.4278	0	0.4343	12.1607	0	0.8686	71.6612	TCGA-5N-A9KI	BLCA	76	FEMALE	WHITE	Stage III	[Not Applicable]	Muscle invasive urothelial carcinoma (pT2 or above)	High Grade	2011	[Not Available]	-27777	Dead	TUMOR FREE	#N/A	76	[Not Available]	#N/A	#N/A	#N/A	#N/A	Complete Remission/Response	#N/A	#N/A	1	76	0	76	0
TCGA-GV-A40G-01A-11R-A23N-07	762.527	9.5848	1.1997	0	1.1997	979.362	2.4322	7.9078	134.773	0	6.865	3.269	0	86.3027	0.6538	0	786.532	0	2.2883	0.9807	TCGA-GV-A40G	BLCA	77	MALE	WHITE	Stage II	[Not Applicable]	Muscle invasive urothelial carcinoma (pT2 or above)	High Grade	2012	[Not Available]	-28204	Alive	TUMOR FREE	580	#N/A	[Not Available]	#N/A	#N/A	#N/A	#N/A	Complete Remission/Response	#N/A	#N/A	0	580	0	580	0
TCGA-YF-AA3L-01A-11R-A38B-07	24.4502	102.448	2.1214	0	0	7169.4	0	3.9782	693.449	1.556	2.0747	2.0747	1.556	85.5809	43.0498	11.9295	4.668	0	4.668	4.668	TCGA-YF-AA3L	BLCA	47	FEMALE	[Unknown]	Stage II	[Not Applicable]	Muscle invasive urothelial carcinoma (pT2 or above)	High Grade	2013	[Not Available]	-17268	Alive	TUMOR FREE	364	#N/A	[Not Available]	#N/A	#N/A	#N/A	#N/A	Complete Remission/Response	#N/A	#N/A	0	364	0	364	0
TCGA-FD-A3SQ-01A-21R-A22U-07	8246.33	125.173	6.7432	3.9262	2.699	3177.08	193.436	4950.66	1192.33	5.0606	208.748	6.3257	1.2651	78.4387	3.7954	0	745.168	0	29.9417	1.6869	TCGA-FD-A3SQ	BLCA	62	MALE	WHITE	Stage IV	[Not Applicable]	Muscle invasive urothelial carcinoma (pT2 or above)	High Grade	2008	[Not Available]	-22687	Dead	WITH TUMOR	#N/A	1423	[Not Available]	Locoregional (Urothelial tumor event)	Other, specify	sigmoid colon	991	Stable Disease	#N/A	#N/A	1	1423	1	1423	#N/A
TCGA-4Z-AA89-01A-11R-A39I-07	10282.7	1678.82	4.0315	5.8667	0	5140.54	2.0416	139.682	863.587	1.7204	0	0.5735	15.2774	75.1254	38.4229	0	75.6989	0	2.8674	44.7312	TCGA-4Z-AA89	BLCA	60	MALE	WHITE	Stage IV	[Not Applicable]	Muscle invasive urothelial carcinoma (pT2 or above)	High Grade	2011	[Not Available]	-22271	Alive	WITH TUMOR	1029	#N/A	[Not Available]	New Primary Tumor	Lung	#N/A	648	Complete Remission/Response	#N/A	#N/A	0	1029	0	1029	#N/A
TCGA-YC-A8S6-01A-31R-A38B-07	442.105	903.244	2.452	0	0	2133.84	1.2026	160.267	146.437	2.6725	38.0825	2.6725	181.46	74.8288	8.6855	10.6898	190.413	0	0	11.3579	TCGA-YC-A8S6	BLCA	71	MALE	WHITE	Stage II	[Not Applicable]	Muscle invasive urothelial carcinoma (pT2 or above)	High Grade	2013	[Not Available]	-26130	Alive	TUMOR FREE	293	#N/A	[Not Available]	#N/A	#N/A	#N/A	#N/A	Complete Remission/Response	#N/A	#N/A	0	293	0	293	0
TCGA-FJ-A3ZF-01A-11R-A23N-07	8.0242	48.5559	3.0604	0	0	471.628	0	1.7704	24.0604	0.6042	94.2598	3.9275	1	74.0181	2.1148	1.2085	50.1511	0	11.1782	3.6254	TCGA-FJ-A3ZF	BLCA	73	MALE	WHITE	Stage III	[Not Applicable]	Muscle invasive urothelial carcinoma (pT2 or above)	High Grade	2012	[Not Available]	-26825	Alive	TUMOR FREE	524	#N/A	[Not Available]	#N/A	#N/A	#N/A	#N/A	Complete Remission/Response	#N/A	#N/A	0	524	0	524	0
TCGA-XF-A9SP-01A-11R-A39I-07	1196.4	0	3.8356	0	1.9178	2125.46	5.819	18.2384	459.381	0.5464	1.0928	0	4.9175	72.1232	4.3711	1.6392	32.2369	0	4.9175	4.3711	TCGA-XF-A9SP	BLCA	59	MALE	WHITE	Stage III	[Not Applicable]	Muscle invasive urothelial carcinoma (pT2 or above)	High Grade	2004	[Not Available]	-21776	Dead	WITH TUMOR	#N/A	454	[Not Available]	Locoregional (Urothelial tumor event)	Renal Pelvis	#N/A	310	Stable Disease	#N/A	#N/A	1	454	1	454	#N/A
TCGA-BT-A20W-01A-21R-A14Y-07	1610.15	82.5767	10.8951	4.8913	2.9731	2275.37	3.977	34.6036	406.151	0	1.2788	19.1816	0.6394	70.3325	3.1969	0	310.742	0	5.1151	1.2788	TCGA-BT-A20W	BLCA	71	MALE	WHITE	Stage II	[Not Applicable]	Muscle invasive urothelial carcinoma (pT2 or above)	High Grade	2009	[Not Available]	-26078	Dead	TUMOR FREE	#N/A	254	[Not Available]	#N/A	#N/A	#N/A	#N/A	Complete Remission/Response	#N/A	#N/A	1	254	0	254	0
TCGA-ZF-A9R3-01A-11R-A38B-07	3606.73	106.964	7.8064	7.6001	1.1141	3363.2	140.955	4581.69	1051.61	0	0.3751	1.1254	1.5005	64.1471	19.1316	3.001	7.8777	0	9.7534	0.3751	TCGA-ZF-A9R3	BLCA	53	FEMALE	WHITE	Stage II	[Not Applicable]	Muscle invasive urothelial carcinoma (pT2 or above)	High Grade	2012	[Not Available]	-19384	Dead	WITH TUMOR	#N/A	949	[Not Available]	Distant Metastasis	Bone	#N/A	917	Complete Remission/Response	#N/A	#N/A	1	949	1	949	1
TCGA-FD-A5BS-01A-21R-A26T-07	651.154	0	0	0	0	1066.78	1.6343	68.2087	233.472	0	32.3176	3.6934	0	60.9418	0	0	314.866	1.8467	22.1607	101.57	TCGA-FD-A5BS	BLCA	68	MALE	WHITE	Stage III	[Not Applicable]	Muscle invasive urothelial carcinoma (pT2 or above)	High Grade	2009	[Not Available]	-24963	Alive	TUMOR FREE	1639	#N/A	[Not Available]	#N/A	#N/A	#N/A	#N/A	Complete Remission/Response	#N/A	#N/A	0	1639	0	1639	0
TCGA-ZF-A9R9-01A-11R-A38B-07	1271.94	679.492	9.6933	12.5241	3.234	7200.17	22.9185	1138.97	949.43	0.8764	1824.72	5.2585	1.8405	58.7204	2.6293	12.2699	375.11	0	0.8764	0	TCGA-ZF-A9R9	BLCA	58	MALE	WHITE	Stage IV	[Not Applicable]	Muscle invasive urothelial carcinoma (pT2 or above)	High Grade	2010	[Not Available]	-21491	Dead	WITH TUMOR	#N/A	864	[Not Available]	Distant Metastasis	Other, specify	penis	629	Complete Remission/Response	#N/A	#N/A	1	864	1	864	#N/A
TCGA-DK-A3IN-01A-11R-A20F-07	4.6991	48.5682	8.071	0.7178	0.7327	2554.08	0	0.7103	168.953	1.1215	9.3458	1.1215	0.7477	57.5701	0.3738	0	112.15	3.3645	1.4953	10.0935	TCGA-DK-A3IN	BLCA	72	MALE	WHITE	Stage III	[Not Applicable]	Muscle invasive urothelial carcinoma (pT2 or above)	High Grade	2011	[Not Available]	-26562	Dead	TUMOR FREE	#N/A	250	[Not Available]	#N/A	#N/A	#N/A	#N/A	Complete Remission/Response	#N/A	#N/A	1	250	0	250	0
TCGA-UY-A78P-01A-12R-A36F-07	675.13	14.0258	0	0	0	1260.22	11.4159	385.264	253.452	16.1817	0	2.088	3.1319	57.4188	5.2199	20.8796	18.7916	1.044	3.1319	54.2868	TCGA-UY-A78P	BLCA	78	FEMALE	WHITE	Stage II	[Not Applicable]	Muscle invasive urothelial carcinoma (pT2 or above)	High Grade	#N/A	[Not Available]	-28719	Alive	TUMOR FREE	2380	#N/A	[Not Available]	#N/A	#N/A	#N/A	#N/A	Complete Remission/Response	#N/A	#N/A	0	2380	0	2380	0
TCGA-CF-A1HR-01A-11R-A13Y-07	1.6377	136.287	6.1918	0	0	3945.49	1.705	84.5373	120.275	1.1217	200.785	1.6826	0.6562	56.6461	1.1217	0	5.6085	0	16.2647	5.6085	TCGA-CF-A1HR	BLCA	62	MALE	ASIAN	Stage III	[Not Applicable]	Muscle invasive urothelial carcinoma (pT2 or above)	High Grade	2010	[Not Available]	-22777	Alive	WITH TUMOR	389	#N/A	[Not Available]	Distant Metastasis	Liver	#N/A	294	Complete Remission/Response	#N/A	#N/A	0	389	0	389	1
TCGA-S5-A6DX-01A-11R-A31N-07	762.887	145.051	0	0	0	3855.96	9.3541	0	1215.07	0.7782	389.883	7.0039	2.3346	52.9183	1.5564	0	1343.19	3.8911	0.7782	22.5681	TCGA-S5-A6DX	BLCA	83	MALE	WHITE	Stage IV	[Not Applicable]	Muscle invasive urothelial carcinoma (pT2 or above)	High Grade	2013	[Not Available]	-30594	Dead	WITH TUMOR	#N/A	56	[Not Available]	#N/A	#N/A	#N/A	#N/A	[Unknown]	#N/A	#N/A	1	56	1	56	#N/A
TCGA-4Z-AA7M-01A-11R-A39I-07	2117.99	10.1198	4.1939	3.0828	1.0512	1294.48	3.1645	10.1307	292.168	0	3.268	6.5359	2.1786	48.4749	10.3486	1.0893	1153.05	0	6.5359	4.3573	TCGA-4Z-AA7M	BLCA	65	MALE	WHITE	Stage III	[Not Applicable]	Muscle invasive urothelial carcinoma (pT2 or above)	High Grade	2013	[Not Available]	-23817	Alive	TUMOR FREE	495	#N/A	[Not Available]	#N/A	#N/A	#N/A	#N/A	Complete Remission/Response	#N/A	#N/A	0	495	0	495	0
TCGA-ZF-AA4R-01A-11R-A38B-07	9.4532	24.3106	2.2746	3.345	1.1402	2762.36	0	0	191.885	1.7452	0	1.1635	1.1635	44.2118	0	3.4904	34.904	0	9.3077	263.525	TCGA-ZF-AA4R	BLCA	67	MALE	WHITE	Stage IV	[Not Applicable]	Muscle invasive urothelial carcinoma (pT2 or above)	High Grade	2008	[Not Available]	-24537	Dead	WITH TUMOR	#N/A	1036	[Not Available]	Locoregional (Urothelial tumor event)	Lymph Node Only	#N/A	750	[Unknown]	#N/A	#N/A	1	1036	1	1036	#N/A
TCGA-ZF-A9RM-01A-11R-A38B-07	0	903.51	33.3902	9.1815	0	2734.4	1.346	0.6478	244.988	0	4.6548	22.1102	3.0023	41.1171	17.4554	32.9713	129.17	6.9822	11.249	0	TCGA-ZF-A9RM	BLCA	70	MALE	WHITE	Stage II	[Not Applicable]	Muscle invasive urothelial carcinoma (pT2 or above)	High Grade	2010	[Not Available]	-25642	Alive	TUMOR FREE	1455	#N/A	[Not Available]	#N/A	#N/A	#N/A	#N/A	Complete Remission/Response	#N/A	#N/A	0	1455	0	1455	0
TCGA-CF-A47V-01A-11R-A23W-07	219.192	430.649	12.3413	13.6182	1.7623	10086.3	1.7866	634.621	1131.85	0	404.904	15.5359	1.0341	40.7816	12.6229	0	418.012	0	21.8473	39.8107	TCGA-CF-A47V	BLCA	52	MALE	ASIAN	Stage II	[Not Applicable]	Muscle invasive urothelial carcinoma (pT2 or above)	High Grade	2012	[Not Available]	-19265	Alive	TUMOR FREE	379	#N/A	[Not Available]	#N/A	#N/A	#N/A	#N/A	Complete Remission/Response	#N/A	#N/A	0	379	0	379	0
TCGA-GD-A6C6-01A-21R-A31N-07	875.674	65.3435	5.3388	0	0	6734.71	0	0	2606.83	0	0	6.1522	0	36.9134	0	0	2380.91	0.6836	2.7343	4.1015	TCGA-GD-A6C6	BLCA	64	MALE	WHITE	Stage III	[Not Applicable]	Muscle invasive urothelial carcinoma (pT2 or above)	High Grade	2012	[Not Available]	-23631	Alive	TUMOR FREE	67	#N/A	[Not Available]	#N/A	#N/A	#N/A	#N/A	Complete Remission/Response	#N/A	#N/A	0	67	0	67	0
TCGA-R3-A69X-01A-22R-A30C-07	5935.02	131.707	26.5157	1.0317	3.1826	10389.7	49.3423	93.195	558.1	0.3807	0	0	0.7614	35.7857	0	0	3.4263	0	1.5228	2.2842	TCGA-R3-A69X	BLCA	70	MALE	WHITE	Stage III	[Not Applicable]	Muscle invasive urothelial carcinoma (pT2 or above)	High Grade	2012	[Not Available]	-25576	Alive	TUMOR FREE	433	#N/A	[Not Available]	#N/A	#N/A	#N/A	#N/A	Complete Remission/Response	#N/A	#N/A	0	433	0	433	0
TCGA-CF-A9FM-01A-11R-A38B-07	4.1668	1472.1	10.0225	4.1853	2.2876	10771.2	0	2.9743	898.743	0	3.7121	2.784	0.928	35.7285	1.856	38.5125	103.009	0.464	12.9922	15.7762	TCGA-CF-A9FM	BLCA	50	MALE	ASIAN	Stage I	[Not Applicable]	[Not Available]	High Grade	2013	[Not Available]	-18445	Alive	TUMOR FREE	398	#N/A	[Not Available]	#N/A	#N/A	#N/A	#N/A	Complete Remission/Response	#N/A	#N/A	0	398	0	398	0
TCGA-ZF-A9RE-01A-11R-A38B-07	1629.13	32.5519	2.4347	0	0	1395.81	2.829	12.0938	62.0671	6.3932	1.0655	2.1311	1.5983	35.6953	12.7864	3.1966	43.6867	1.0655	0	212.573	TCGA-ZF-A9RE	BLCA	78	FEMALE	WHITE	Stage II	[Not Applicable]	Muscle invasive urothelial carcinoma (pT2 or above)	High Grade	2010	[Not Available]	-28622	Dead	WITH TUMOR	#N/A	106	[Not Available]	#N/A	#N/A	#N/A	#N/A	Progressive Disease	#N/A	#N/A	1	106	1	106	#N/A
TCGA-LT-A5Z6-01A-11R-A28M-07	27.839	86.2909	1.6364	3.226	0	2158.43	10.6338	421.034	434.805	0	0	0	0	34.8052	7.7922	0	0	0	0.5195	1.5584	TCGA-LT-A5Z6	BLCA	56	MALE	WHITE	Stage II	[Not Applicable]	Muscle invasive urothelial carcinoma (pT2 or above)	High Grade	2013	[Not Available]	-20746	Alive	TUMOR FREE	474	#N/A	[Not Available]	#N/A	#N/A	#N/A	#N/A	Complete Remission/Response	#N/A	#N/A	0	474	0	474	0
TCGA-KQ-A41R-01A-21R-A352-07	498.561	31.5534	0	19.2851	0	1408.67	0	6.2842	298.667	2.6478	0.8826	22.9479	11.3416	32.6567	10.5914	90.0265	30.0088	1.7652	6.1783	0	TCGA-KQ-A41R	BLCA	80	FEMALE	WHITE	Stage II	[Not Applicable]	Muscle invasive urothelial carcinoma (pT2 or above)	High Grade	2011	[Not Available]	-29351	Alive	TUMOR FREE	1350	#N/A	[Not Available]	#N/A	#N/A	#N/A	#N/A	Complete Remission/Response	#N/A	#N/A	0	1350	0	1350	0
TCGA-FD-A5BR-01A-11R-A26T-07	1468.01	23.4277	1.6925	3.2888	0	602.68	36.0224	1003.83	317.533	1.6017	0	0	0	32.0342	1.0678	0.5339	8.0085	0	11.7459	2.6695	TCGA-FD-A5BR	BLCA	57	MALE	WHITE	Stage II	[Not Applicable]	Muscle invasive urothelial carcinoma (pT2 or above)	High Grade	2012	[Not Available]	-20964	Alive	TUMOR FREE	813	#N/A	[Not Available]	#N/A	#N/A	#N/A	#N/A	Complete Remission/Response	#N/A	#N/A	0	813	0	813	0
TCGA-DK-AA6R-01A-11R-A42T-07	0	11.4558	2.585	1.6883	0	1159.81	0	0	115.98	37.6774	0	0	0	31.9542	0	0.4769	0.4769	0	4.7693	117.801	TCGA-DK-AA6R	BLCA	68	MALE	WHITE	Stage IV	[Not Applicable]	Muscle invasive urothelial carcinoma (pT2 or above)	High Grade	2001	[Not Available]	-25196	Alive	WITH TUMOR	5041	#N/A	[Not Available]	New Primary Tumor	Other, specify	Colon	4907	Stable Disease	#N/A	#N/A	0	5041	0	5041	#N/A
TCGA-CF-A5U8-01A-11R-A28M-07	26.6332	943.303	27.4894	15.9672	3.6628	10448.3	0	12.1723	1505.05	0	2.6427	1.5856	3.2928	31.1839	12.685	0	440.803	0.5285	1.5856	0	TCGA-CF-A5U8	BLCA	59	MALE	ASIAN	Stage II	[Not Applicable]	Muscle invasive urothelial carcinoma (pT2 or above)	Low Grade	2012	[Not Available]	-21734	Alive	TUMOR FREE	399	#N/A	[Not Available]	#N/A	#N/A	#N/A	#N/A	Complete Remission/Response	#N/A	#N/A	0	399	0	399	0
TCGA-FD-A5BY-01A-31R-A28M-07	0	8.6319	4.0204	0	0.695	2117.88	9.4892	0	201.209	0.8324	0	0	0	30.7984	1.6648	0.4162	8.3239	0	2.4972	0.4162	TCGA-FD-A5BY	BLCA	63	FEMALE	WHITE	Stage III	[Not Applicable]	Muscle invasive urothelial carcinoma (pT2 or above)	High Grade	2012	[Not Available]	-23080	Alive	TUMOR FREE	251	#N/A	[Not Available]	#N/A	#N/A	#N/A	#N/A	Complete Remission/Response	#N/A	#N/A	0	251	0	251	0
TCGA-FJ-A3Z7-01A-12R-A23N-07	0	0	0	0	0	3.6765	0	0	0	4.902	0.6127	0	0	28.799	0	0	12.8676	0	2.451	37.9902	TCGA-FJ-A3Z7	BLCA	76	MALE	WHITE	Stage IV	[Not Applicable]	Muscle invasive urothelial carcinoma (pT2 or above)	High Grade	2010	[Not Available]	-28052	Alive	TUMOR FREE	945	#N/A	[Not Available]	#N/A	#N/A	#N/A	#N/A	Complete Remission/Response	#N/A	#N/A	0	945	0	945	#N/A
TCGA-DK-A1AB-01A-11R-A13Y-07	4324.51	52.7037	4.1413	1.0168	2.5871	1902.73	78.655	31.6435	182.647	0.3218	0	0	0	27.9945	3.5395	0.6436	0	0.3218	17.6977	107.473	TCGA-DK-A1AB	BLCA	74	FEMALE	WHITE	Stage IV	[Not Applicable]	Muscle invasive urothelial carcinoma (pT2 or above)	High Grade	2010	[Not Available]	-27126	Dead	#N/A	#N/A	508	[Not Available]	Metastatic	Lung	#N/A	364	Progressive Disease	#N/A	#N/A	1	508	#N/A	508	#N/A
TCGA-BL-A0C8-01A-11R-A10U-07	0	4.9417	1.6686	0	0	297.707	0	1.8086	34.5916	3.5006	54.8425	0	2.3337	27.4212	0	1.1669	14.5858	0	1.1669	1.7503	TCGA-BL-A0C8	BLCA	73	MALE	WHITE	Stage I	[Not Applicable]	[Not Available]	High Grade	2009	[Not Available]	-26819	Alive	#N/A	1219	#N/A	[Not Available]	Locoregional (Urothelial tumor event)	Bladder	#N/A	630	Complete Remission/Response	#N/A	#N/A	0	1219	0	1219	1
TCGA-FT-A3EE-01A-11R-A206-07	4165.15	45.5377	10.5966	2.0607	0	4555.6	30.0125	644.846	300.02	0	1.0028	0.5014	0	26.8238	1.2534	0	235.648	0	0.2507	10.529	TCGA-FT-A3EE	BLCA	80	FEMALE	WHITE	Stage III	[Not Applicable]	Muscle invasive urothelial carcinoma (pT2 or above)	High Grade	2011	[Not Available]	-29293	Dead	TUMOR FREE	#N/A	99	[Not Available]	#N/A	#N/A	#N/A	#N/A	[Not Available]	#N/A	#N/A	1	99	0	99	#N/A
TCGA-KQ-A41Q-01A-11R-A33J-07	3030.71	93.2623	9.6632	0.9726	1.9347	2322.04	29.385	655.493	765.913	0	0.5201	1.0402	0.5201	26.0044	0	7.2812	18.2031	0	2.0804	0	TCGA-KQ-A41Q	BLCA	89	MALE	WHITE	Stage III	[Not Applicable]	Muscle invasive urothelial carcinoma (pT2 or above)	High Grade	2009	[Not Available]	-32511	Alive	#N/A	1429	#N/A	[Not Available]	Locoregional (Urothelial tumor event)	Lymph Node Only	#N/A	1314	[Unknown]	#N/A	#N/A	0	1429	0	1429	#N/A
TCGA-DK-A3WY-01A-11R-A22U-07	44.6638	2.334	1.4518	0	0	305.794	0	0	50.4625	0	0	0	0	25.2677	0	0	0	0	1.7131	113.062	TCGA-DK-A3WY	BLCA	67	FEMALE	WHITE	Stage III	[Not Applicable]	Muscle invasive urothelial carcinoma (pT2 or above)	High Grade	2001	[Not Available]	-24536	Alive	TUMOR FREE	4967	#N/A	[Not Available]	#N/A	#N/A	#N/A	#N/A	Complete Remission/Response	#N/A	#N/A	0	4967	0	4967	0
TCGA-G2-A2EK-01A-22R-A18C-07	105.208	155.894	1.154	0	0	773.499	2.338	1507.81	109.771	2.9974	4.1214	2.9974	0.3747	24.7284	1.4987	1.8734	301.986	0	4.4961	2.248	TCGA-G2-A2EK	BLCA	57	MALE	WHITE	Stage II	[Not Applicable]	Muscle invasive urothelial carcinoma (pT2 or above)	High Grade	2010	[Not Available]	-20995	Alive	WITH TUMOR	485	#N/A	[Not Available]	Distant Metastasis	Renal Pelvis	#N/A	485	Stable Disease	#N/A	#N/A	0	485	0	485	#N/A
TCGA-BT-A20Q-01A-11R-A14Y-07	5048.87	91.1759	0	1.3641	0	2783.68	4.2662	48.1091	292.046	0	0.9407	0	0	23.048	0.4704	0	0.4704	0	19.285	0	TCGA-BT-A20Q	BLCA	73	MALE	WHITE	Stage IV	[Not Applicable]	Muscle invasive urothelial carcinoma (pT2 or above)	High Grade	2006	[Not Available]	-26778	Dead	WITH TUMOR	#N/A	593	[Not Available]	#N/A	#N/A	#N/A	#N/A	Progressive Disease	#N/A	#N/A	1	593	1	593	#N/A
TCGA-HQ-A2OF-01A-11R-A26T-07	951.785	703.742	15.6536	5.0899	13.5662	560.404	9.4853	187.921	101.368	0.4085	7386.85	343.954	2.451	22.8758	0.817	0	540.441	0.817	4.4935	531.046	TCGA-HQ-A2OF	BLCA	52	FEMALE	[Not Evaluated]	Stage III	[Not Applicable]	Muscle invasive urothelial carcinoma (pT2 or above)	High Grade	#N/A	[Not Available]	-19016	Alive	TUMOR FREE	1947	#N/A	[Not Available]	Locoregional (Urothelial tumor event)	Lymph Node Only	#N/A	907	Complete Remission/Response	#N/A	#N/A	0	1947	0	1947	1
TCGA-FJ-A3ZE-01A-11R-A23N-07	1.2807	2.6963	2.7676	0	0	526.281	0	0	70.8565	1.586	0.3965	2.3791	0	21.0151	2.3791	0	195.876	0	1.9826	1.586	TCGA-FJ-A3ZE	BLCA	65	MALE	WHITE	Stage IV	[Not Applicable]	Muscle invasive urothelial carcinoma (pT2 or above)	High Grade	2012	[Not Available]	-23866	Dead	WITH TUMOR	#N/A	324	[Not Available]	Distant Metastasis	Bone	#N/A	152	Progressive Disease	#N/A	#N/A	1	324	1	324	#N/A
TCGA-E7-A6MD-01A-41R-A352-07	10688.5	103.422	14.2362	16.8844	4.7437	3410.61	9.603	138.452	771.849	6.5327	0	0	0.7839	20.1005	10.0503	1.005	0	0.5025	1.5075	5.5276	TCGA-E7-A6MD	BLCA	66	MALE	WHITE	Stage IV	[Not Applicable]	Muscle invasive urothelial carcinoma (pT2 or above)	High Grade	2012	[Not Available]	-24180	Alive	#N/A	129	#N/A	[Not Available]	#N/A	#N/A	#N/A	#N/A	[Unknown]	#N/A	#N/A	0	129	0	129	#N/A
TCGA-FD-A6TD-01A-51R-A33J-07	1.6894	29.044	5.1947	0	0	1817.87	0	408.771	130.966	0	0	8.0931	1.0116	19.7269	0.5058	4.0465	231.664	0.5058	6.0698	54.6282	TCGA-FD-A6TD	BLCA	77	MALE	WHITE	Stage III	[Not Applicable]	Muscle invasive urothelial carcinoma (pT2 or above)	High Grade	2012	[Not Available]	-28328	Dead	TUMOR FREE	#N/A	386	[Not Available]	#N/A	#N/A	#N/A	#N/A	Complete Remission/Response	#N/A	#N/A	1	386	0	386	0
TCGA-4Z-AA87-01A-11R-A39I-07	35.5588	46.823	6.6757	1.3013	0	2808.98	0.7183	2.552	147.947	0.845	41.4064	1.2675	0.845	19.4356	0.4225	0.4225	227.313	0	0.845	0	TCGA-4Z-AA87	BLCA	72	MALE	BLACK OR AFRICAN AMERICAN	Stage III	[Not Applicable]	Muscle invasive urothelial carcinoma (pT2 or above)	High Grade	2010	[Not Available]	-26430	Alive	WITH TUMOR	1454	#N/A	[Not Available]	Distant Metastasis	Bone	#N/A	221	[Unknown]	#N/A	#N/A	0	1454	0	1454	#N/A
TCGA-DK-AA75-01A-11R-A39I-07	7.2146	3.6164	0	0	0	1941.44	11.1872	17.3425	350.694	0	0	1.8265	0	19.1781	0	0.9132	2.7397	0	5.4795	26.484	TCGA-DK-AA75	BLCA	82	MALE	WHITE	Stage III	[Not Applicable]	Muscle invasive urothelial carcinoma (pT2 or above)	High Grade	2013	[Not Available]	-30090	Dead	WITH TUMOR	#N/A	340	[Not Available]	Distant Metastasis	Bone	#N/A	328	Stable Disease	#N/A	#N/A	1	340	1	340	#N/A
TCGA-G2-AA3F-01A-12R-A42T-07	1533.77	125.352	8.0764	2.043	0	5300	15.8905	21.1609	257.714	0	3.1797	0	1.1924	19.0782	11.5264	1.5898	44.5157	0	0.3975	0	TCGA-G2-AA3F	BLCA	77	MALE	WHITE	Stage IV	[Not Applicable]	Muscle invasive urothelial carcinoma (pT2 or above)	High Grade	2012	[Not Available]	-28457	Alive	TUMOR FREE	893	#N/A	[Not Available]	#N/A	#N/A	#N/A	#N/A	Partial Remission/Response	#N/A	#N/A	0	893	0	893	#N/A
TCGA-CU-A3YL-01A-11R-A22U-07	1267.25	226.535	0	0	0	3132.6	1.8558	3.4465	290.642	0	0	0	2.6884	19.0698	21.8605	0.9302	0.9302	0.9302	1.3953	18.6047	TCGA-CU-A3YL	BLCA	67	MALE	WHITE	Stage III	[Not Applicable]	Muscle invasive urothelial carcinoma (pT2 or above)	High Grade	2011	[Not Available]	-24524	Alive	TUMOR FREE	906	#N/A	[Not Available]	Distant Metastasis	Lung	#N/A	370	Complete Remission/Response	#N/A	#N/A	0	906	0	906	1
TCGA-2F-A9KR-01A-11R-A38B-07	8840.66	92.5224	4.9291	1.5955	0	3977.99	204.557	87.3607	1238.11	27.0672	1.4246	0.4749	3.324	18.9945	33.7153	0.4749	4.7486	0	22.7935	25.1678	TCGA-2F-A9KR	BLCA	59	FEMALE	[Not Evaluated]	Stage III	[Not Applicable]	Muscle invasive urothelial carcinoma (pT2 or above)	High Grade	2000	[Not Available]	-21848	Dead	WITH TUMOR	#N/A	3183	[Not Available]	Distant Metastasis	Lung	#N/A	3086	Complete Remission/Response	#N/A	#N/A	1	3183	1	3183	1
TCGA-G2-A3IE-01A-11R-A20F-07	780.538	150.159	5.0022	16.32	1.6659	7237.94	20.5553	2275.29	684.857	0	0	0	3.5654	18.9511	26.4434	0.4407	18.0696	0	0	1.7629	TCGA-G2-A3IE	BLCA	51	MALE	WHITE	Stage II	[Not Applicable]	Muscle invasive urothelial carcinoma (pT2 or above)	High Grade	2007	[Not Available]	-18983	Dead	WITH TUMOR	#N/A	612	[Not Available]	#N/A	#N/A	#N/A	#N/A	Progressive Disease	#N/A	#N/A	1	612	1	612	#N/A
TCGA-ZF-A9R0-01A-11R-A38B-07	5339.13	20.6045	5.2221	12.6438	2.6074	4377.28	5.2877	140.867	742.389	0	1.4567	4.37	0.7283	18.9366	9.4683	32.7749	88.1282	0.7283	16.7516	1.4567	TCGA-ZF-A9R0	BLCA	82	MALE	WHITE	Stage III	[Not Applicable]	Muscle invasive urothelial carcinoma (pT2 or above)	High Grade	2013	[Not Available]	-30222	Dead	WITH TUMOR	#N/A	680	[Not Available]	Locoregional (Urothelial tumor event)	Other, specify	right hemipelvis	559	Progressive Disease	#N/A	#N/A	1	680	1	680	#N/A
TCGA-GD-A3OQ-01A-32R-A220-07	9239.31	94.3061	4.4137	0	0	1755.74	0.9267	385.104	416.4	0	0	0	0	18.6536	6.0173	0	4.513	0	1.2035	54.4566	TCGA-GD-A3OQ	BLCA	48	MALE	WHITE	Stage IV	[Not Applicable]	Muscle invasive urothelial carcinoma (pT2 or above)	High Grade	2011	[Not Available]	-17682	Alive	#N/A	95	#N/A	[Not Available]	#N/A	#N/A	#N/A	#N/A	[Unknown]	#N/A	#N/A	0	95	0	95	#N/A
TCGA-ZF-A9R2-01A-11R-A39I-07	864.069	279.195	2.5752	1.6927	0	2732.67	4.3194	5.0161	81.0476	5.1606	1.0321	0	6.1927	18.5782	10.8373	0	13.9337	0	0	35.0922	TCGA-ZF-A9R2	BLCA	75	MALE	WHITE	Stage II	[Not Applicable]	Muscle invasive urothelial carcinoma (pT2 or above)	High Grade	2013	[Not Available]	-27537	Alive	TUMOR FREE	642	#N/A	[Not Available]	#N/A	#N/A	#N/A	#N/A	Complete Remission/Response	#N/A	#N/A	0	642	0	642	0
TCGA-BL-A13J-01A-11R-A10U-07	7548.83	55.1657	5.9899	1.0689	0	4358.01	302.891	1624.77	1076.72	0.6941	1.3882	4.1645	1.3882	17.3521	0	0	301.232	0	0	6.2467	TCGA-BL-A13J	BLCA	65	MALE	WHITE	Stage IV	[Not Applicable]	Muscle invasive urothelial carcinoma (pT2 or above)	High Grade	2010	[Not Available]	-23927	Dead	WITH TUMOR	#N/A	81	[Not Available]	#N/A	#N/A	#N/A	#N/A	Stable Disease	#N/A	#N/A	1	81	1	81	#N/A
TCGA-GD-A76B-01A-11R-A32O-07	1.9094	5.2387	0	0	0	519.705	0	3.7923	17.4711	0.441	0	0	0.8819	17.1977	11.0241	0.441	2.2048	0	20.2844	0.441	TCGA-GD-A76B	BLCA	86	FEMALE	WHITE	Stage II	[Not Applicable]	Muscle invasive urothelial carcinoma (pT2 or above)	High Grade	2013	[Not Available]	-31571	Alive	TUMOR FREE	224	#N/A	[Not Available]	#N/A	#N/A	#N/A	#N/A	Complete Remission/Response	#N/A	#N/A	0	224	0	224	0
TCGA-BT-A2LB-01A-11R-A18C-07	15675.4	46.4258	8.398	0.6337	0.6444	2757.13	91.6696	150.313	2206.69	0.712	26.6999	0	0	16.7319	0.712	0	34.1759	0.356	1.068	2.848	TCGA-BT-A2LB	BLCA	73	FEMALE	WHITE	Stage III	[Not Applicable]	Muscle invasive urothelial carcinoma (pT2 or above)	High Grade	2010	[Not Available]	-26846	Dead	TUMOR FREE	#N/A	492	[Not Available]	#N/A	#N/A	#N/A	#N/A	Complete Remission/Response	#N/A	#N/A	1	492	0	492	0
TCGA-E5-A4U1-01A-11R-A31N-07	80.1421	49.4774	0	3.236	0	2964.19	0	0	323.488	8.047	0	0	13.7948	16.6687	2.2991	0	1.1496	0	54.6044	2.2991	TCGA-E5-A4U1	BLCA	72	MALE	[Unknown]	Stage II	[Not Applicable]	Muscle invasive urothelial carcinoma (pT2 or above)	High Grade	2011	[Not Available]	-26305	Alive	WITH TUMOR	1181	#N/A	[Not Available]	Distant Metastasis	Bone	#N/A	705	Complete Remission/Response	#N/A	#N/A	0	1181	0	1181	1
TCGA-FD-A6TI-01A-11R-A32O-07	68.3381	99.7718	3.2061	3.7197	1.908	2381.36	10.5956	352.792	96.4943	1.0699	0	0	0	15.6919	1.4265	1.7832	8.2026	0	2.4964	0	TCGA-FD-A6TI	BLCA	73	MALE	WHITE	Stage IV	[Not Applicable]	Muscle invasive urothelial carcinoma (pT2 or above)	High Grade	2013	[Not Available]	-26874	Dead	TUMOR FREE	#N/A	294	[Not Available]	#N/A	#N/A	#N/A	#N/A	[Unknown]	#N/A	#N/A	1	294	0	294	#N/A
TCGA-XF-AAMG-01A-11R-A42T-07	107.184	409.801	7.2807	1.7871	3.6379	3927.38	1.6011	4.529	489.356	1.4689	535.16	1.9585	35.1551	15.668	14.1991	1.9585	81.7673	0.4896	219.352	294.264	TCGA-XF-AAMG	BLCA	49	MALE	WHITE	Stage III	[Not Applicable]	Muscle invasive urothelial carcinoma (pT2 or above)	High Grade	2004	[Not Available]	-18021	Alive	TUMOR FREE	3364	#N/A	[Not Available]	#N/A	#N/A	#N/A	#N/A	Complete Remission/Response	#N/A	#N/A	0	3364	0	3364	0
TCGA-KQ-A41N-01A-11R-A33J-07	6690.06	149.723	0	0	2.674	11800.2	10.8505	177.371	719.42	54.768	0.6443	0	1.5271	15.4639	2.5773	32.8608	5.799	1.933	0.6443	0	TCGA-KQ-A41N	BLCA	73	MALE	BLACK OR AFRICAN AMERICAN	Stage III	[Not Applicable]	Muscle invasive urothelial carcinoma (pT2 or above)	High Grade	2011	[Not Available]	-26837	Alive	TUMOR FREE	1604	#N/A	[Not Available]	#N/A	#N/A	#N/A	#N/A	Complete Remission/Response	#N/A	#N/A	0	1604	0	1604	0
TCGA-DK-A1AG-01A-11R-A13Y-07	350.113	164.679	5.1789	2.5048	2.5894	4982.79	0	4.892	321.916	0	0	0	0	15.0805	6.6207	0.3678	0.3678	0	1.8391	5.1494	TCGA-DK-A1AG	BLCA	65	MALE	WHITE	Stage III	[Not Applicable]	Muscle invasive urothelial carcinoma (pT2 or above)	High Grade	2010	[Not Available]	-24095	Alive	TUMOR FREE	475	#N/A	[Not Available]	#N/A	#N/A	#N/A	#N/A	Complete Remission/Response	#N/A	#N/A	0	475	0	475	0
TCGA-XF-A8HF-01A-11R-A36F-07	1159.57	54.8554	8.5479	2.0533	1.0437	7752.92	0	10.0908	1186.18	1.1344	5.6721	0.5672	0	14.7476	1.1344	0.5672	24.9575	3.4033	2.8361	2.2689	TCGA-XF-A8HF	BLCA	80	MALE	WHITE	Stage III	[Not Applicable]	Muscle invasive urothelial carcinoma (pT2 or above)	High Grade	2004	[Not Available]	-29288	Dead	TUMOR FREE	#N/A	2954	[Not Available]	#N/A	#N/A	#N/A	#N/A	Complete Remission/Response	#N/A	#N/A	1	2954	0	2954	0
TCGA-CF-A9FF-01A-11R-A38B-07	1497.31	326.453	2.8315	0	2.8315	7463.26	2.8642	16.0641	654.977	0.8183	34.3704	0	5.3601	13.9118	34.3704	0.8183	77.7425	0	0	4.0917	TCGA-CF-A9FF	BLCA	52	MALE	ASIAN	Stage II	[Not Applicable]	Muscle invasive urothelial carcinoma (pT2 or above)	High Grade	2013	[Not Available]	-19195	Alive	TUMOR FREE	361	#N/A	[Not Available]	#N/A	#N/A	#N/A	#N/A	Complete Remission/Response	#N/A	#N/A	0	361	0	361	0
TCGA-DK-AA77-01A-11R-A39I-07	6284.86	124.978	3.0235	0	0	1485.23	1.5285	64.7724	316.876	0	0	0	4.3124	13.8955	19.1663	0	4.3124	0	0.9583	1.9166	TCGA-DK-AA77	BLCA	61	MALE	WHITE	Stage II	[Not Applicable]	Muscle invasive urothelial carcinoma (pT2 or above)	High Grade	2013	[Not Available]	-22365	Alive	TUMOR FREE	618	#N/A	[Not Available]	Distant Metastasis	Other, specify	Pelvis	467	Stable Disease	#N/A	#N/A	0	618	0	618	#N/A
TCGA-GC-A3WC-01A-31R-A22U-07	1403.8	32.5141	4.1234	3.2494	0.8226	2564.45	0.8278	11.2442	395.933	53.4704	0.5141	0	2.0566	13.8817	12.3393	0	0.5141	0	2.0566	4.1131	TCGA-GC-A3WC	BLCA	80	FEMALE	WHITE	Stage III	[Not Applicable]	Muscle invasive urothelial carcinoma (pT2 or above)	High Grade	2011	[Not Available]	-29295	Alive	TUMOR FREE	540	#N/A	[Not Available]	#N/A	#N/A	#N/A	#N/A	Complete Remission/Response	#N/A	#N/A	0	540	0	540	0
TCGA-HQ-A2OE-01A-11R-A206-07	3115.15	116.75	16.3617	2.4486	1.259	2745.16	43.9131	43.83	154.438	1.155	7789.79	28.413	3.8508	13.86	0.231	0.924	1119.2	0.462	1.386	3.465	TCGA-HQ-A2OE	BLCA	69	MALE	[Not Evaluated]	[Not Available]	[Not Applicable]	Muscle invasive urothelial carcinoma (pT2 or above)	[Unknown]	2007	[Not Available]	#N/A	Alive	#N/A	1174	#N/A	[Not Available]	#N/A	#N/A	#N/A	#N/A	[Unknown]	#N/A	#N/A	0	1174	0	1174	#N/A
TCGA-E7-A6ME-01A-22R-A32O-07	2.9047	35.144	1.6931	2.5124	1.6931	1234.08	0	26.3059	127.647	3.4757	0	0	0	13.4062	0.4965	1.4896	2.9791	0.4965	87.3883	375.869	TCGA-E7-A6ME	BLCA	75	MALE	ASIAN	Stage II	[Not Applicable]	Muscle invasive urothelial carcinoma (pT2 or above)	High Grade	2013	[Not Available]	-27670	Alive	TUMOR FREE	731	#N/A	[Not Available]	#N/A	#N/A	#N/A	#N/A	Complete Remission/Response	#N/A	#N/A	0	731	0	731	0
TCGA-XF-AAMR-01A-31R-A42T-07	4430.14	35.6585	0.6989	0	0	5436.58	1.3086	1039.46	360.743	14.3099	12.236	3.5256	0	13.0655	1.4517	0	354.221	0	10.5769	17.4207	TCGA-XF-AAMR	BLCA	48	MALE	WHITE	Stage III	[Not Applicable]	Muscle invasive urothelial carcinoma (pT2 or above)	High Grade	2006	[Not Available]	-17670	Alive	TUMOR FREE	2790	#N/A	[Not Available]	#N/A	#N/A	#N/A	#N/A	Complete Remission/Response	#N/A	#N/A	0	2790	0	2790	0
TCGA-2F-A9KO-01A-11R-A38B-07	8420.75	101.808	4.6764	6.7988	5.2362	4388.09	620.828	161.831	898.723	1.1662	0	0	0	12.828	1.1662	0	0	0	59.4752	34.4023	TCGA-2F-A9KO	BLCA	63	MALE	WHITE	Stage IV	[Not Applicable]	Muscle invasive urothelial carcinoma (pT2 or above)	High Grade	2008	[Not Available]	-23323	Dead	WITH TUMOR	#N/A	734	[Not Available]	Distant Metastasis	Liver	#N/A	651	Progressive Disease	#N/A	#N/A	1	734	1	734	#N/A
TCGA-GC-A4ZW-01A-11R-A26T-07	2.6797	4.2626	0.8026	0	0	416.805	0	1.5517	7.7405	0	2.2294	0.4459	0.8918	12.4847	0	0	1.7835	0	3.1212	16.4976	TCGA-GC-A4ZW	BLCA	71	MALE	WHITE	Stage III	[Not Applicable]	Muscle invasive urothelial carcinoma (pT2 or above)	High Grade	2012	[Not Available]	-25964	Alive	TUMOR FREE	15	#N/A	[Not Available]	#N/A	#N/A	#N/A	#N/A	[Unknown]	#N/A	#N/A	0	15	0	15	#N/A
TCGA-FD-A6TB-01A-12R-A33J-07	0	2.1647	0	0	0	40.0978	0	0	0.4089	0	4.4449	0.889	0	12.0013	0.4445	0	3.1115	0	64.8961	52.0058	TCGA-FD-A6TB	BLCA	82	MALE	WHITE	Stage III	[Not Applicable]	Muscle invasive urothelial carcinoma (pT2 or above)	High Grade	2012	[Not Available]	-30185	Alive	TUMOR FREE	572	#N/A	[Not Available]	#N/A	#N/A	#N/A	#N/A	Complete Remission/Response	#N/A	#N/A	0	572	0	572	0
TCGA-ZF-AA4T-01A-11R-A38B-07	2.3712	381.365	9.3392	1.8319	0.9329	5992.31	0	0	720.209	0	3.8873	6.3168	2.1623	11.6618	13.1195	16.5209	1138	0.4859	91.8367	185.617	TCGA-ZF-AA4T	BLCA	65	MALE	WHITE	Stage IV	[Not Applicable]	Muscle invasive urothelial carcinoma (pT2 or above)	High Grade	2008	[Not Available]	-23974	Dead	WITH TUMOR	#N/A	599	[Not Available]	Distant Metastasis	Lung	#N/A	511	[Unknown]	#N/A	#N/A	1	599	1	599	#N/A
TCGA-CF-A9FL-01A-11R-A38B-07	9631.46	34.0075	2.1511	0	0	2277.93	2.1854	107.848	581.403	70.7538	0.5706	0	0	11.4119	9.1295	0.5706	6.2766	0	2.2824	0.5706	TCGA-CF-A9FL	BLCA	85	MALE	ASIAN	Stage III	[Not Applicable]	Muscle invasive urothelial carcinoma (pT2 or above)	High Grade	2013	[Not Available]	-31099	Dead	WITH TUMOR	#N/A	565	[Not Available]	Locoregional (Urothelial tumor event)	#N/A	#N/A	322	Complete Remission/Response	#N/A	#N/A	1	565	1	565	1
TCGA-HQ-A5ND-01A-11R-A26T-07	2327.55	59.618	15.9506	3.8742	1.3303	1642.39	22.7551	1264.14	197.227	6.2921	1.3483	0	0	11.236	0	0	2.2472	0	63.3708	1100.22	TCGA-HQ-A5ND	BLCA	78	MALE	[Not Evaluated]	Stage IV	[Not Applicable]	Muscle invasive urothelial carcinoma (pT2 or above)	High Grade	#N/A	[Not Available]	-28555	Dead	WITH TUMOR	#N/A	274	[Not Available]	Distant Metastasis	Lymph Node Only	#N/A	84	Progressive Disease	#N/A	#N/A	1	274	1	274	#N/A
TCGA-G2-A2EF-01A-12R-A18C-07	338.749	0	0	0	0	121.117	1.7051	1.5979	24.3112	2.0922	0.2615	0.7846	0	10.984	0	0	161.098	0	38.7055	162.667	TCGA-G2-A2EF	BLCA	50	MALE	WHITE	Stage II	[Not Applicable]	Muscle invasive urothelial carcinoma (pT2 or above)	High Grade	2007	[Not Available]	-18467	Alive	TUMOR FREE	1884	#N/A	[Not Available]	#N/A	#N/A	#N/A	#N/A	Partial Remission/Response	#N/A	#N/A	0	1884	0	1884	#N/A
TCGA-DK-A6B0-01A-11R-A31N-07	142.149	1565.96	5.2587	1.6934	0	8429.39	0	36.4009	875.46	0.9649	0	0	0.8009	10.6139	14.4735	0	7.7192	0	2.4123	34.7365	TCGA-DK-A6B0	BLCA	61	MALE	WHITE	Stage II	[Not Applicable]	Muscle invasive urothelial carcinoma (pT2 or above)	High Grade	2007	[Not Available]	-22439	Alive	TUMOR FREE	2330	#N/A	[Not Available]	#N/A	#N/A	#N/A	#N/A	Complete Remission/Response	#N/A	#N/A	0	2330	0	2330	0
TCGA-DK-AA6S-01A-21R-A39I-07	64.8958	27.1115	6.0642	1.9654	0	1954.67	0	0	154.508	0	0	0	0	10.5734	0	0	0	0	0	425.424	TCGA-DK-AA6S	BLCA	60	MALE	WHITE	Stage III	[Not Applicable]	Muscle invasive urothelial carcinoma (pT2 or above)	High Grade	2000	[Not Available]	-22027	Alive	TUMOR FREE	5050	#N/A	[Not Available]	Distant Metastasis	Other, specify	soft tissue pelvic mass	539	Complete Remission/Response	#N/A	#N/A	0	5050	0	5050	1
TCGA-GV-A3QK-01B-11R-A23N-07	34.5328	255.591	5.8124	2.2552	3.4859	4896.6	1.1782	12.1426	360.259	0	1.1257	0.3752	3.0356	10.1313	3.7523	1.1257	12.3827	0	5.6285	1.1257	TCGA-GV-A3QK	BLCA	56	FEMALE	WHITE	Stage IV	[Not Applicable]	Muscle invasive urothelial carcinoma (pT2 or above)	High Grade	2012	[Not Available]	-20802	Alive	WITH TUMOR	832	#N/A	[Not Available]	#N/A	#N/A	#N/A	#N/A	Stable Disease	#N/A	#N/A	0	832	0	832	#N/A
TCGA-XF-A9SH-01A-11R-A39I-07	83.9098	350.727	20.644	17.2033	0	8027.07	23.873	6013.28	1287.58	0.92	1.8399	0	0	10.1196	13.7994	0	33.1187	0	1.8399	1.8399	TCGA-XF-A9SH	BLCA	65	FEMALE	ASIAN	Stage II	[Not Applicable]	Muscle invasive urothelial carcinoma (pT2 or above)	High Grade	2005	[Not Available]	-24060	Dead	WITH TUMOR	#N/A	1971	[Not Available]	Locoregional (Urothelial tumor event)	Lymph Node Only	#N/A	547	Stable Disease	#N/A	#N/A	1	1971	1	1971	#N/A
TCGA-GV-A3JV-01A-11R-A220-07	0	2164.91	8.0728	0	4.613	2738.93	0	0	129.768	0	202.274	0.7276	0.7276	9.8226	0.3638	0.3638	130.969	0.3638	8.3674	1.4552	TCGA-GV-A3JV	BLCA	66	MALE	WHITE	Stage IV	[Not Applicable]	Muscle invasive urothelial carcinoma (pT2 or above)	High Grade	2011	[Not Available]	-24243	Dead	WITH TUMOR	#N/A	434	[Not Available]	Locoregional (Urothelial tumor event)	Bladder	#N/A	134	Partial Remission/Response	#N/A	#N/A	1	434	1	434	#N/A
TCGA-KQ-A41P-01A-12R-A33J-07	3.9363	45.9771	10.8023	11.7529	4.0593	9195.45	0	0.9561	947.369	0	1.1183	0	1.1183	9.5052	7.2687	0	14.5373	0.5591	0	0	TCGA-KQ-A41P	BLCA	76	MALE	WHITE	Stage IV	[Not Applicable]	Muscle invasive urothelial carcinoma (pT2 or above)	High Grade	2011	[Not Available]	-27816	Alive	WITH TUMOR	1094	#N/A	[Not Available]	Locoregional (Urothelial tumor event)	Lymph Node Only	#N/A	178	Stable Disease	#N/A	#N/A	0	1094	0	1094	#N/A
TCGA-CF-A47S-01A-11R-A23W-07	175.696	1181.29	20.4766	6.0321	6.2309	11542.9	0	964.771	1243.76	0	1.2742	0.7645	0.2548	8.6646	8.4098	0.2548	224.516	0	5.8614	7.1356	TCGA-CF-A47S	BLCA	41	MALE	ASIAN	Stage II	[Not Applicable]	Muscle invasive urothelial carcinoma (pT2 or above)	Low Grade	2011	[Not Available]	-15225	Alive	TUMOR FREE	333	#N/A	[Not Available]	#N/A	#N/A	#N/A	#N/A	Complete Remission/Response	#N/A	#N/A	0	333	0	333	0
TCGA-XF-AAMW-01A-11R-A42T-07	1219.49	10.2216	0	0	4.4793	464.797	0	263.73	58.8586	0	0	0	0	8.6291	0	0	0	0	0	145.126	TCGA-XF-AAMW	BLCA	79	FEMALE	WHITE	Stage IV	[Not Applicable]	Muscle invasive urothelial carcinoma (pT2 or above)	High Grade	2006	[Not Available]	-28903	Dead	WITH TUMOR	#N/A	253	[Not Available]	#N/A	#N/A	#N/A	#N/A	Partial Remission/Response	#N/A	#N/A	1	253	1	253	#N/A
TCGA-GU-A764-01A-11R-A352-07	110.059	5.61	0	15.3922	0	1408.92	0	0	130.151	0.4292	0	1.7169	0	8.5846	0	3.0046	66.5307	0.4292	7.2969	95.7184	TCGA-GU-A764	BLCA	66	MALE	WHITE	Stage II	[Not Applicable]	Muscle invasive urothelial carcinoma (pT2 or above)	High Grade	2012	[Not Available]	-24343	Alive	TUMOR FREE	610	#N/A	[Not Available]	#N/A	#N/A	#N/A	#N/A	Complete Remission/Response	#N/A	#N/A	0	610	0	610	0
TCGA-ZF-A9R7-01A-11R-A38B-07	1490.39	40.0143	8.5903	19.3548	5.7316	1175.83	2.9014	26.9898	802.467	1.4258	0	0	1.4971	8.5546	4.2773	0	8.5546	0	74.1401	1.4258	TCGA-ZF-A9R7	BLCA	76	FEMALE	WHITE	Stage II	[Not Applicable]	Muscle invasive urothelial carcinoma (pT2 or above)	High Grade	2011	[Not Available]	-28063	Alive	TUMOR FREE	665	#N/A	[Not Available]	#N/A	#N/A	#N/A	#N/A	Complete Remission/Response	#N/A	#N/A	0	665	0	665	0
TCGA-E7-A7XN-01A-11R-A352-07	6.2805	1.612	0	0	0	14.2913	0	0	0	0	0.493	0.986	0	8.3806	0.493	0	45.8467	0	12.3244	277.545	TCGA-E7-A7XN	BLCA	66	MALE	ASIAN	Stage III	[Not Applicable]	Muscle invasive urothelial carcinoma (pT2 or above)	High Grade	2013	[Not Available]	-24466	Alive	WITH TUMOR	428	#N/A	[Not Available]	Locoregional (Urothelial tumor event)	Bladder	#N/A	190	Progressive Disease	#N/A	#N/A	0	428	0	428	#N/A
TCGA-DK-A6B2-01A-11R-A30C-07	5.603	19.129	6.6876	0	0	2595.85	0.6742	1.9556	244.054	2.5126	0.8375	0	0	8.3752	0	2.5126	20.938	0	2.5126	3.3501	TCGA-DK-A6B2	BLCA	70	MALE	WHITE	Stage IV	[Not Applicable]	Muscle invasive urothelial carcinoma (pT2 or above)	High Grade	2012	[Not Available]	-25625	Alive	WITH TUMOR	477	#N/A	[Not Available]	Distant Metastasis	Liver	#N/A	268	Complete Remission/Response	#N/A	#N/A	0	477	0	477	#N/A
TCGA-CF-A47W-01A-11R-A23W-07	6.8255	101.891	12.2642	1.6934	1.7547	7809.03	0	3.3113	1781.63	0.4717	0	1.8868	35.8491	8.0189	10.3774	0	24.5283	0	0.9434	0.9434	TCGA-CF-A47W	BLCA	42	MALE	ASIAN	Stage II	[Not Applicable]	Muscle invasive urothelial carcinoma (pT2 or above)	Low Grade	2012	[Not Available]	-15497	Alive	TUMOR FREE	368	#N/A	[Not Available]	#N/A	#N/A	#N/A	#N/A	Complete Remission/Response	#N/A	#N/A	0	368	0	368	0
TCGA-FD-A3NA-01A-11R-A21D-07	12538.4	467.999	24.4791	1.2309	2.5116	10354.4	118.782	322.837	2251.99	0.6636	0.3318	1.6589	0	7.9628	0	0.6636	166.556	0	12.6078	4.3132	TCGA-FD-A3NA	BLCA	60	MALE	WHITE	Stage II	[Not Applicable]	Muscle invasive urothelial carcinoma (pT2 or above)	High Grade	2009	[Not Available]	-21936	Alive	TUMOR FREE	1845	#N/A	[Not Available]	New Primary Tumor	Lung	#N/A	1338	Complete Remission/Response	#N/A	#N/A	0	1845	0	1845	0
TCGA-CF-A8HX-01A-11R-A36F-07	234.658	11.3675	2.3321	2.2466	0	1895.89	2.3626	8.7607	197.704	2.442	0	9.1575	0.6105	7.9365	17.094	15.873	77.5336	3.663	0	0	TCGA-CF-A8HX	BLCA	55	FEMALE	ASIAN	Stage II	[Not Applicable]	Muscle invasive urothelial carcinoma (pT2 or above)	High Grade	2013	[Not Available]	-20259	Alive	TUMOR FREE	345	#N/A	[Not Available]	#N/A	#N/A	#N/A	#N/A	Complete Remission/Response	#N/A	#N/A	0	345	0	345	0
TCGA-GC-A3OO-01A-11R-A22U-07	1574.36	552.54	0	0	0	528.308	1.6381	1570.84	247.043	0	0	0	0	7.847	0	0	30.4071	0	0	0.9809	TCGA-GC-A3OO	BLCA	79	MALE	WHITE	Stage II	[Not Applicable]	Muscle invasive urothelial carcinoma (pT2 or above)	High Grade	2011	[Not Available]	-29065	Alive	TUMOR FREE	481	#N/A	[Not Available]	#N/A	#N/A	#N/A	#N/A	Complete Remission/Response	#N/A	#N/A	0	481	0	481	0
TCGA-UY-A9PA-01A-11R-A38B-07	365.16	1044.56	24.8768	6.9273	3.9039	6990.34	5.8867	6644.88	898.688	0	0	1.2315	0.6158	7.3892	7.3892	0	20.3202	0	20.936	4.9261	TCGA-UY-A9PA	BLCA	48	MALE	WHITE	Stage III	[Not Applicable]	Muscle invasive urothelial carcinoma (pT2 or above)	High Grade	#N/A	[Not Available]	-17520	Alive	TUMOR FREE	1072	#N/A	[Not Available]	#N/A	#N/A	#N/A	#N/A	Complete Remission/Response	#N/A	#N/A	0	1072	0	1072	0
TCGA-E7-A97Q-01A-11R-A38B-07	22.5585	131.96	14.6224	1.777	9.1383	4543.02	0	128.907	386.347	0.5273	0	0.5273	0	7.3824	2.1093	0	0.5273	0	0.5273	0	TCGA-E7-A97Q	BLCA	60	FEMALE	WHITE	Stage IV	[Not Applicable]	Muscle invasive urothelial carcinoma (pT2 or above)	High Grade	2013	[Not Available]	-22249	Dead	WITH TUMOR	#N/A	246	[Not Available]	#N/A	#N/A	#N/A	#N/A	Stable Disease	#N/A	#N/A	1	246	1	246	#N/A
TCGA-4Z-AA7S-01A-11R-A39I-07	3518.43	1051.13	4.3152	0	1.4369	941.275	0	31.5702	215.834	0	0	0	2.288	7.3217	4.1184	0	20.1346	0	0.9152	0.9152	TCGA-4Z-AA7S	BLCA	66	MALE	BLACK OR AFRICAN AMERICAN	Stage III	[Not Applicable]	Muscle invasive urothelial carcinoma (pT2 or above)	High Grade	2010	[Not Available]	-24111	Dead	TUMOR FREE	#N/A	1064	[Not Available]	#N/A	#N/A	#N/A	#N/A	[Not Applicable]	#N/A	#N/A	1	1064	0	1064	#N/A
TCGA-GU-AATP-01A-11R-A39I-07	1536.08	29.1508	6.0469	0	0	5165.09	64.4363	689.641	759.919	0.7321	43.1918	0.7321	0.9151	7.3206	0.7321	3.6603	124.451	0.7321	15.3734	3.6603	TCGA-GU-AATP	BLCA	74	MALE	WHITE	Stage IV	[Not Applicable]	Muscle invasive urothelial carcinoma (pT2 or above)	High Grade	2012	[Not Available]	-27049	Alive	WITH TUMOR	1003	#N/A	[Not Available]	New Primary Tumor	Urethra	#N/A	596	Progressive Disease	#N/A	#N/A	0	1003	0	1003	#N/A
TCGA-UY-A9PF-01A-11R-A38B-07	21011.8	220.727	8.8182	5.7091	2.9364	3108.66	297.764	391.209	2335.13	4.5455	1.8182	0	0.0727	7.2727	1.8182	0.9091	8.1818	0	0	1.8182	TCGA-UY-A9PF	BLCA	77	MALE	WHITE	Stage IV	[Not Applicable]	Muscle invasive urothelial carcinoma (pT2 or above)	High Grade	#N/A	[Not Available]	-28470	Alive	TUMOR FREE	117	#N/A	[Not Available]	#N/A	#N/A	#N/A	#N/A	Complete Remission/Response	#N/A	#N/A	0	117	0	117	#N/A
TCGA-GU-A762-01A-11R-A33J-07	495.369	0	0	0	0	364.924	0	41.4008	78.5485	0.4784	0.9568	4.3056	0	7.176	0	0.9568	2.392	0.9568	15.7872	1.9136	TCGA-GU-A762	BLCA	87	MALE	WHITE	Stage IV	[Not Applicable]	Muscle invasive urothelial carcinoma (pT2 or above)	High Grade	2012	[Not Available]	-31812	Dead	WITH TUMOR	#N/A	232	[Not Available]	#N/A	#N/A	#N/A	#N/A	Progressive Disease	#N/A	#N/A	1	232	1	232	#N/A
TCGA-DK-A1AC-01A-11R-A13Y-07	0	0	0	0	0	0.931	0	1.1691	0	0	0	0	0	7.0004	0	0.35	1.4001	0	4.2002	24.8512	TCGA-DK-A1AC	BLCA	72	MALE	WHITE	Stage III	[Not Applicable]	Muscle invasive urothelial carcinoma (pT2 or above)	High Grade	2000	[Not Available]	-26307	Alive	TUMOR FREE	3981	#N/A	[Not Available]	#N/A	#N/A	#N/A	#N/A	Complete Remission/Response	#N/A	#N/A	0	3981	0	3981	0
TCGA-K4-A6FZ-01A-11R-A31N-07	325.006	382.461	3.9829	0.9673	0	3408.16	3.0225	2769.15	249.256	0.3442	0	0	0	6.8849	3.0982	0	9.983	0	2.7539	95.3552	TCGA-K4-A6FZ	BLCA	75	FEMALE	WHITE	Stage III	[Not Applicable]	Muscle invasive urothelial carcinoma (pT2 or above)	High Grade	2012	[Not Available]	-27686	Alive	TUMOR FREE	55	#N/A	[Not Available]	#N/A	#N/A	#N/A	#N/A	Complete Remission/Response	#N/A	#N/A	0	55	0	55	0
TCGA-K4-AAQO-01A-11R-A38B-07	2218.14	44.686	3.6176	0	0	860.254	36.5992	239.37	274.5	0	1.1131	0.5566	1.1131	6.6787	1.6697	1.1131	21.1492	0	0.5566	3.8959	TCGA-K4-AAQO	BLCA	56	MALE	WHITE	Stage III	[Not Applicable]	Muscle invasive urothelial carcinoma (pT2 or above)	High Grade	2013	[Not Available]	-20683	Alive	#N/A	359	#N/A	[Not Available]	#N/A	#N/A	#N/A	#N/A	[Unknown]	#N/A	#N/A	0	359	0	359	#N/A
TCGA-FD-A3B4-01A-12R-A206-07	2.6628	9.094	0	0	0	90.4653	0	0	2.4567	0	0	0	0	6.5424	0.6542	0	0	0	14.0662	6.2153	TCGA-FD-A3B4	BLCA	55	FEMALE	BLACK OR AFRICAN AMERICAN	Stage III	[Not Applicable]	Muscle invasive urothelial carcinoma (pT2 or above)	High Grade	2011	[Not Available]	-20379	Dead	WITH TUMOR	#N/A	510	[Not Available]	Locoregional (Urothelial tumor event)	Other, specify	Left posterior pelvic wall	359	Complete Remission/Response	#N/A	#N/A	1	510	1	510	1
TCGA-BT-A20U-01A-11R-A14Y-07	9143	30.5392	2.0107	3.571	1.8344	2766.06	202.324	745.423	412.442	0.6528	0	0	0	6.5283	0	1.9585	1.3057	0	1.9585	186.055	TCGA-BT-A20U	BLCA	70	FEMALE	WHITE	Stage III	[Not Applicable]	Muscle invasive urothelial carcinoma (pT2 or above)	High Grade	2008	[Not Available]	-25761	Dead	TUMOR FREE	#N/A	455	[Not Available]	#N/A	#N/A	#N/A	#N/A	Complete Remission/Response	#N/A	#N/A	1	455	0	455	0
TCGA-CU-A0YO-01A-11R-A10U-07	2892.64	110.011	10.8435	2.6844	3.0981	2532.29	29.7666	3169.81	758.127	0	0	0	1.5915	6.366	4.7745	0	5.8355	0	0.5305	0.5305	TCGA-CU-A0YO	BLCA	84	MALE	WHITE	Stage IV	[Not Applicable]	Muscle invasive urothelial carcinoma (pT2 or above)	High Grade	2009	[Not Available]	-30817	Dead	WITH TUMOR	#N/A	149	[Not Available]	Metastatic	Other, specify	peritoneum	118	Complete Remission/Response	#N/A	#N/A	1	149	1	149	#N/A
TCGA-CF-A47Y-01A-11R-A23W-07	32.2547	255.003	7.9059	13.3735	9.8795	13030.7	0	27.9977	1361.8	0.5737	0	0	0.5737	6.311	1.1474	0	109.581	0	5.1635	0	TCGA-CF-A47Y	BLCA	55	MALE	ASIAN	Stage II	[Not Applicable]	Muscle invasive urothelial carcinoma (pT2 or above)	Low Grade	2012	[Not Available]	-20432	Alive	TUMOR FREE	373	#N/A	[Not Available]	#N/A	#N/A	#N/A	#N/A	Complete Remission/Response	#N/A	#N/A	0	373	0	373	0
TCGA-UY-A78O-01A-12R-A33J-07	389.627	29.9656	20.2811	1.9564	0	1545.32	0	5.7487	207.894	12.0482	0.5737	3.4423	2.0998	6.311	0.5737	26.3913	2.2949	1.7212	0	0	TCGA-UY-A78O	BLCA	75	FEMALE	WHITE	Stage II	[Not Applicable]	Muscle invasive urothelial carcinoma (pT2 or above)	High Grade	#N/A	[Not Available]	-27234	Alive	TUMOR FREE	2312	#N/A	[Not Available]	#N/A	#N/A	#N/A	#N/A	Complete Remission/Response	#N/A	#N/A	0	2312	0	2312	0
TCGA-GC-A6I1-01A-12R-A31N-07	8.0745	0	0	0	0	39.7796	7.3977	1.7261	2.3085	0	0	0	0	6.2959	0	0	1.0493	0	15.2151	1.574	TCGA-GC-A6I1	BLCA	90	FEMALE	WHITE	Stage II	[Not Applicable]	Muscle invasive urothelial carcinoma (pT2 or above)	High Grade	2012	[Not Available]	-32873	Dead	TUMOR FREE	#N/A	272	[Not Available]	#N/A	#N/A	#N/A	#N/A	Complete Remission/Response	#N/A	#N/A	1	272	0	272	0
TCGA-GC-A6I3-01A-11R-A31N-07	2105.13	19.5672	0	0	0	9082.41	0	5.3971	1270.99	1.3476	0	0.6738	0	6.0642	0	0	45.1446	0	27.6258	0	TCGA-GC-A6I3	BLCA	90	FEMALE	BLACK OR AFRICAN AMERICAN	Stage IV	[Not Applicable]	Muscle invasive urothelial carcinoma (pT2 or above)	High Grade	2013	[Not Available]	-32873	Alive	TUMOR FREE	423	#N/A	[Not Available]	#N/A	#N/A	#N/A	#N/A	Complete Remission/Response	#N/A	#N/A	0	423	0	423	#N/A
TCGA-XF-AAME-01A-12R-A42T-07	2.4992	15.293	2.797	0	1.2863	799.482	7.7954	78.2346	51.2787	34.0995	7.3379	0	0.9064	6.0429	2.5898	0.4316	6.0429	0	15.9706	77.695	TCGA-XF-AAME	BLCA	64	FEMALE	WHITE	Stage II	[Not Applicable]	Muscle invasive urothelial carcinoma (pT2 or above)	High Grade	2006	[Not Available]	-23448	Dead	WITH TUMOR	#N/A	2828	[Not Available]	Locoregional (Urothelial tumor event)	Other, specify	Vagina	1651	Progressive Disease	#N/A	#N/A	1	2828	1	2828	#N/A
TCGA-GV-A3JZ-01A-11R-A21D-07	1040.4	47.5639	1.001	1.0198	0	6727.69	0	5.7089	316.137	0.6256	1.5641	5.9435	0	5.9435	0	0	254.321	0	0	275.28	TCGA-GV-A3JZ	BLCA	55	MALE	WHITE	Stage IV	[Not Applicable]	Muscle invasive urothelial carcinoma (pT2 or above)	High Grade	2011	[Not Available]	-20420	Alive	WITH TUMOR	603	#N/A	[Not Available]	#N/A	#N/A	#N/A	#N/A	Stable Disease	#N/A	#N/A	0	603	0	603	#N/A
TCGA-GC-A3I6-01A-11R-A20F-07	46.066	21.5629	8.0355	1.1188	1.1463	3098.45	1.162	817.474	217.466	4.3181	0	0	0	5.8883	9.0287	0	11.7766	0	20.8053	0.7851	TCGA-GC-A3I6	BLCA	45	MALE	WHITE	Stage III	[Not Applicable]	Muscle invasive urothelial carcinoma (pT2 or above)	High Grade	2011	[Not Available]	-16504	Dead	WITH TUMOR	#N/A	630	[Not Available]	Locoregional (Urothelial tumor event)	Bladder	#N/A	546	Progressive Disease	#N/A	#N/A	1	630	1	630	#N/A
TCGA-DK-A2I1-01A-11R-A180-07	2203.64	152.9	14.7582	0	6.5602	2921.03	0	26.3352	306.272	0	0	0.4499	2.6997	5.8493	2.2497	1.3498	27.4466	0	0	1.7998	TCGA-DK-A2I1	BLCA	73	FEMALE	WHITE	Stage II	[Not Applicable]	Muscle invasive urothelial carcinoma (pT2 or above)	High Grade	2010	[Not Available]	-26726	Alive	TUMOR FREE	546	#N/A	[Not Available]	#N/A	#N/A	#N/A	#N/A	Complete Remission/Response	#N/A	#N/A	0	546	0	546	0
TCGA-FD-A62O-01A-11R-A30C-07	8.6717	3303.58	180.076	160.757	35.7167	17692.1	28.6112	15.63	1299.36	0.5256	643.279	0.5256	0	5.7811	0	0	101.432	0	19.9711	0	TCGA-FD-A62O	BLCA	74	MALE	WHITE	Stage IV	[Not Applicable]	Muscle invasive urothelial carcinoma (pT2 or above)	High Grade	2012	[Not Available]	-27310	Dead	TUMOR FREE	#N/A	216	[Not Available]	#N/A	#N/A	#N/A	#N/A	[Unknown]	#N/A	#N/A	1	216	0	216	#N/A
TCGA-S5-AA26-01A-11R-A38B-07	3494.33	270.367	13.1674	28.0625	7.8975	5614.75	26.6803	37.3927	1260.83	0	0	4.3195	6.0329	5.7594	77.0316	15.1184	4.3195	0	2.8797	0	TCGA-S5-AA26	BLCA	46	MALE	BLACK OR AFRICAN AMERICAN	Stage III	[Not Applicable]	Muscle invasive urothelial carcinoma (pT2 or above)	High Grade	2013	[Not Available]	-16972	Alive	TUMOR FREE	503	#N/A	[Not Available]	#N/A	#N/A	#N/A	#N/A	Complete Remission/Response	#N/A	#N/A	0	503	0	503	0
TCGA-CF-A7I0-01A-22R-A352-07	138.307	365.078	11.7501	3.7881	7.8353	4324.99	0	70.5124	208.417	0	1.1514	0	0	5.7571	2.8785	0	14.9683	0	1.7271	3.4542	TCGA-CF-A7I0	BLCA	54	MALE	ASIAN	Stage II	[Not Applicable]	Muscle invasive urothelial carcinoma (pT2 or above)	Low Grade	2013	[Not Available]	-20059	Alive	TUMOR FREE	368	#N/A	[Not Available]	#N/A	#N/A	#N/A	#N/A	Complete Remission/Response	#N/A	#N/A	0	368	0	368	0
TCGA-HQ-A5NE-01A-12R-A28M-07	43.8889	130.887	9.41	0	1.1757	2314.42	79.6899	815.28	286.12	11.6279	0	0.8613	0.59	5.5986	0.4307	0	50.8183	0	12.9199	9.4746	TCGA-HQ-A5NE	BLCA	57	MALE	[Not Evaluated]	Stage III	[Not Applicable]	Muscle invasive urothelial carcinoma (pT2 or above)	High Grade	#N/A	[Not Available]	-20647	Dead	WITH TUMOR	#N/A	370	[Not Available]	Distant Metastasis	Renal Pelvis	#N/A	211	Complete Remission/Response	#N/A	#N/A	1	370	1	370	1
TCGA-2F-A9KQ-01A-11R-A38B-07	11060.3	1092.37	10.1066	1.4047	0	2360.15	4.3857	252.805	627.881	0	2.318	6.0269	4.6361	5.5633	5.0997	15.7626	230.413	0.4636	1.3908	0	TCGA-2F-A9KQ	BLCA	69	MALE	WHITE	Stage III	[Not Applicable]	Muscle invasive urothelial carcinoma (pT2 or above)	High Grade	2007	[Not Available]	-25259	Alive	TUMOR FREE	2886	#N/A	[Not Available]	#N/A	#N/A	#N/A	#N/A	Complete Remission/Response	#N/A	#N/A	0	2886	0	2886	0
TCGA-XF-A8HE-01A-11R-A36F-07	91.9193	1.4398	0	0	0	157.232	69.3514	1.3915	7.6869	0.9663	4.8315	0	25.1045	5.3147	4.3484	0	3.8652	1.4495	1.4495	34.7868	TCGA-XF-A8HE	BLCA	47	MALE	WHITE	Stage III	[Not Applicable]	Muscle invasive urothelial carcinoma (pT2 or above)	High Grade	2004	[Not Available]	-17212	Alive	TUMOR FREE	3817	#N/A	[Not Available]	#N/A	#N/A	#N/A	#N/A	Complete Remission/Response	#N/A	#N/A	0	3817	0	3817	0
TCGA-E7-A7DU-01A-11R-A32O-07	10782.4	1110.42	6.6637	6.4166	3.3274	15397.6	155.366	356.884	1663.64	0	0	0	2.4095	5.2957	30.8914	16.7696	4.4131	0	2.6478	5.2957	TCGA-E7-A7DU	BLCA	73	MALE	WHITE	Stage III	[Not Applicable]	Muscle invasive urothelial carcinoma (pT2 or above)	Low Grade	2013	[Not Available]	-27000	Alive	TUMOR FREE	28	#N/A	[Not Available]	#N/A	#N/A	#N/A	#N/A	Complete Remission/Response	#N/A	#N/A	0	28	0	28	0
TCGA-FD-A43S-01A-21R-A23W-07	430.531	209.796	1.9724	1.9009	1.9724	5500.13	4.001	756.52	1106.45	1.022	0	1.022	0	5.1099	8.6868	0	29.6372	0	8.1758	5.1099	TCGA-FD-A43S	BLCA	71	FEMALE	WHITE	Stage III	[Not Applicable]	Muscle invasive urothelial carcinoma (pT2 or above)	High Grade	2012	[Not Available]	-25993	Alive	TUMOR FREE	455	#N/A	[Not Available]	#N/A	#N/A	#N/A	#N/A	Complete Remission/Response	#N/A	#N/A	0	455	0	455	0
TCGA-E7-A8O7-01A-11R-A36F-07	372.519	1909.36	74.5709	8.4991	3.8751	18717.6	0.5171	1223.41	901.133	0	0.3358	0.6716	0.3358	5.037	51.0414	0.3358	61.787	0	8.7308	5.3728	TCGA-E7-A8O7	BLCA	52	MALE	ASIAN	Stage II	[Not Applicable]	Muscle invasive urothelial carcinoma (pT2 or above)	Low Grade	2013	[Not Available]	-19063	Alive	TUMOR FREE	466	#N/A	[Not Available]	#N/A	#N/A	#N/A	#N/A	Complete Remission/Response	#N/A	#N/A	0	466	0	466	0
TCGA-DK-A3IU-01A-11R-A20F-07	0	0	0	0	0	8.1608	4.5364	0	0	0	0	0	0	5.0019	0	0	0	0	1.9238	31.1658	TCGA-DK-A3IU	BLCA	58	MALE	WHITE	Stage II	[Not Applicable]	Muscle invasive urothelial carcinoma (pT2 or above)	High Grade	2011	[Not Available]	-21369	Dead	WITH TUMOR	#N/A	706	[Not Available]	Distant Metastasis	Lung	#N/A	462	Complete Remission/Response	#N/A	#N/A	1	706	1	706	1
TCGA-CU-A0YR-01A-12R-A10U-07	0	97.4697	418.966	31.7877	31.1496	17209.3	11.0286	0	659.026	0.5501	9.901	0.5501	1.1001	4.9505	0	0	8.2508	0	0	0	TCGA-CU-A0YR	BLCA	83	MALE	WHITE	Stage IV	[Not Applicable]	Muscle invasive urothelial carcinoma (pT2 or above)	High Grade	2010	[Not Available]	-30674	Dead	WITH TUMOR	#N/A	460	[Not Available]	Metastatic	Lymph Node Only	#N/A	219	Complete Remission/Response	#N/A	#N/A	1	460	1	460	#N/A
TCGA-ZF-A9RC-01A-11R-A38B-07	1615.1	1249.2	37.8792	7.8127	2.7069	6857.35	5.4924	1074.13	946.707	3.0211	0.6042	4.8338	0	4.8338	0	10.2719	6.0423	1.2085	4.2296	6.0423	TCGA-ZF-A9RC	BLCA	77	MALE	WHITE	Stage III	[Not Applicable]	Muscle invasive urothelial carcinoma (pT2 or above)	High Grade	2007	[Not Available]	-28275	Alive	TUMOR FREE	2868	#N/A	[Not Available]	#N/A	#N/A	#N/A	#N/A	Complete Remission/Response	#N/A	#N/A	0	2868	0	2868	0
TCGA-FD-A6TE-01A-12R-A33J-07	102.423	35.6877	1.0536	4.6656	1.0536	2580.32	9.5142	1.0252	180.981	0	0	0.6309	0	4.7319	0.6309	1.2618	0.6309	0.3155	23.3438	27.4448	TCGA-FD-A6TE	BLCA	54	MALE	WHITE	Stage IV	[Not Applicable]	Muscle invasive urothelial carcinoma (pT2 or above)	High Grade	2013	[Not Available]	-19874	Alive	TUMOR FREE	376	#N/A	[Not Available]	Distant Metastasis	Other, specify	sacrum	321	[Unknown]	#N/A	#N/A	0	376	0	376	#N/A
TCGA-FD-A43N-01A-11R-A23W-07	1221.6	1438.1	48.5925	4.8405	4.9841	10919.8	27.7432	135.148	939.203	0	0	0	0	4.386	1.5949	0	70.1754	0	3.1898	0.3987	TCGA-FD-A43N	BLCA	76	MALE	WHITE	Stage III	[Not Applicable]	Muscle invasive urothelial carcinoma (pT2 or above)	High Grade	2011	[Not Available]	-27833	Alive	TUMOR FREE	699	#N/A	[Not Available]	#N/A	#N/A	#N/A	#N/A	[Not Applicable]	#N/A	#N/A	0	699	0	699	#N/A
TCGA-BT-A20N-01A-11R-A14Y-07	4943.86	162.319	0	0.8722	0.8884	2629.61	39.8158	44.0087	703.001	4.8754	0	0	0	4.3337	0.5417	0	1.0834	0	2.7086	122.969	TCGA-BT-A20N	BLCA	72	MALE	[Not Available]	Stage III	[Not Applicable]	Muscle invasive urothelial carcinoma (pT2 or above)	High Grade	2003	[Not Available]	-26456	Dead	WITH TUMOR	#N/A	795	[Not Available]	#N/A	#N/A	#N/A	#N/A	Progressive Disease	#N/A	#N/A	1	795	1	795	#N/A
TCGA-XF-A9SL-01A-11R-A39I-07	12.823	1782.21	5.6778	0	0	1974.16	0	339.373	202.084	0	1.5949	0	0	4.2531	0	0	5.3163	0	0	6.3796	TCGA-XF-A9SL	BLCA	69	MALE	WHITE	Stage IV	[Not Applicable]	Muscle invasive urothelial carcinoma (pT2 or above)	High Grade	2004	[Not Available]	-25460	Dead	TUMOR FREE	#N/A	2020	[Not Available]	#N/A	#N/A	#N/A	#N/A	Complete Remission/Response	#N/A	#N/A	1	2020	0	2020	#N/A
TCGA-K4-A3WV-01A-11R-A22U-07	1530.52	1.3026	3.089	2.2701	1.5445	3043.43	2.3337	8.2062	410.803	69.5874	0	2.5459	0.8486	4.2431	3.3945	42.8556	150.207	0	52.6148	76.8007	TCGA-K4-A3WV	BLCA	77	FEMALE	WHITE	Stage II	[Not Applicable]	Muscle invasive urothelial carcinoma (pT2 or above)	High Grade	2011	[Not Available]	-28444	Alive	TUMOR FREE	646	#N/A	[Not Available]	#N/A	#N/A	#N/A	#N/A	[Not Applicable]	#N/A	#N/A	0	646	0	646	#N/A
TCGA-DK-A6AW-01A-11R-A30C-07	0	2.0167	0	5.2566	0	207.13	0	1.9272	10.3998	1.1933	0.5967	1.1933	0	4.1766	0	11.3365	2.3866	2.3866	0	0.5967	TCGA-DK-A6AW	BLCA	70	MALE	WHITE	Stage II	[Not Applicable]	Muscle invasive urothelial carcinoma (pT2 or above)	High Grade	2010	[Not Available]	-25644	Alive	TUMOR FREE	1621	#N/A	[Not Available]	#N/A	#N/A	#N/A	#N/A	Complete Remission/Response	#N/A	#N/A	0	1621	0	1621	0
TCGA-DK-A3X2-01A-11R-A22U-07	50.0758	1.1079	0	1.0892	0	5.0117	0	1.2239	2.1259	0	0	0	0	4.1172	0.7486	0	0	0	0.3743	124.263	TCGA-DK-A3X2	BLCA	85	MALE	WHITE	Stage IV	[Not Applicable]	Muscle invasive urothelial carcinoma (pT2 or above)	High Grade	2010	[Not Available]	-31160	Dead	WITH TUMOR	#N/A	547	[Not Available]	Distant Metastasis	Liver	#N/A	533	Complete Remission/Response	#N/A	#N/A	1	547	1	547	#N/A
TCGA-UY-A9PH-01A-11R-A38B-07	3950.63	298.504	9.0736	1.519	0	3947.9	9.1874	37.2288	559.658	0.8123	1.6246	1.6246	0.8123	4.0616	4.0616	4.0616	15.4341	0	2.437	0	TCGA-UY-A9PH	BLCA	73	MALE	WHITE	Stage II	[Not Applicable]	Muscle invasive urothelial carcinoma (pT2 or above)	High Grade	#N/A	[Not Available]	-26654	Alive	TUMOR FREE	1561	#N/A	[Not Available]	#N/A	#N/A	#N/A	#N/A	Complete Remission/Response	#N/A	#N/A	0	1561	0	1561	0
TCGA-E7-A519-01A-11R-A26T-07	0	17.3742	1.5191	0	0	11634.1	0	0	1582.41	0	0	1.006	0	4.0241	0	0	338.028	0	40.2414	2.0121	TCGA-E7-A519	BLCA	72	MALE	WHITE	Stage II	[Not Applicable]	Muscle invasive urothelial carcinoma (pT2 or above)	High Grade	2012	[Not Available]	-26427	Alive	TUMOR FREE	508	#N/A	[Not Available]	#N/A	#N/A	#N/A	#N/A	Complete Remission/Response	#N/A	#N/A	0	508	0	508	0
TCGA-4Z-AA83-01A-11R-A39I-07	3.4521	822.554	15.9736	6.6403	9.1287	16204.2	0	6.5083	256.918	0.6601	1.3201	2.6403	0	3.9604	0	36.9637	192.739	2.6403	0	0	TCGA-4Z-AA83	BLCA	52	MALE	WHITE	Stage II	[Not Applicable]	Muscle invasive urothelial carcinoma (pT2 or above)	High Grade	2009	[Not Available]	-19280	Alive	TUMOR FREE	2024	#N/A	[Not Available]	#N/A	#N/A	#N/A	#N/A	Complete Remission/Response	#N/A	#N/A	0	2024	0	2024	0
TCGA-E7-A677-01A-11R-A30C-07	1280.18	236.723	37.2308	5.8797	5.1942	10883.6	74.5436	4608.14	954.131	1.3655	944.357	16.3856	234.112	3.8233	6.0081	0	618.284	346.556	23.486	10.6506	TCGA-E7-A677	BLCA	81	MALE	ASIAN	Stage II	[Not Applicable]	Muscle invasive urothelial carcinoma (pT2 or above)	Low Grade	2012	[Not Available]	-29613	Alive	TUMOR FREE	820	#N/A	[Not Available]	#N/A	#N/A	#N/A	#N/A	Complete Remission/Response	#N/A	#N/A	0	820	0	820	0
TCGA-DK-A1AA-01A-11R-A13Y-07	12460.7	911.695	14.3859	0.9299	0.9584	4704.28	147.556	134.678	555.928	1.9042	0	0.3174	3.8083	3.8083	1.9042	0	12.0597	0	1.2694	0	TCGA-DK-A1AA	BLCA	57	MALE	WHITE	Stage III	[Not Applicable]	Muscle invasive urothelial carcinoma (pT2 or above)	High Grade	2010	[Not Available]	-21093	Alive	TUMOR FREE	578	#N/A	[Not Available]	#N/A	#N/A	#N/A	#N/A	Complete Remission/Response	#N/A	#N/A	0	578	0	578	0
TCGA-XF-A8HB-01A-11R-A36F-07	0	5.6736	2.6754	0	0	3925.26	0	0	137.137	0.3434	0.6869	0	0	3.7778	0	3.4344	1.7172	0	0	166.566	TCGA-XF-A8HB	BLCA	50	FEMALE	[Unknown]	Stage II	[Not Applicable]	Muscle invasive urothelial carcinoma (pT2 or above)	High Grade	2006	[Not Available]	-18544	Alive	TUMOR FREE	1370	#N/A	[Not Available]	#N/A	#N/A	#N/A	#N/A	Complete Remission/Response	#N/A	#N/A	0	1370	0	1370	0
TCGA-FJ-A3Z9-01A-11R-A26T-07	0	3232.36	41.7973	14.1667	18.806	10939.8	0	1.9776	1502.29	0	6.2189	0.6219	4.26	3.7313	23.01	0	82.0896	0	0	0	TCGA-FJ-A3Z9	BLCA	72	MALE	WHITE	[Not Available]	[Not Applicable]	Muscle invasive urothelial carcinoma (pT2 or above)	High Grade	2012	[Not Available]	-26515	Dead	TUMOR FREE	#N/A	385	[Not Available]	#N/A	#N/A	#N/A	#N/A	Complete Remission/Response	#N/A	#N/A	1	385	0	385	0
TCGA-K4-A6MB-01A-11R-A31N-07	5134.05	61.6055	7.185	0	0	961.253	114.071	63.5637	306.937	0.36	0	0	0.36	3.5997	0.36	0	4.6796	0	0	0.7199	TCGA-K4-A6MB	BLCA	64	MALE	WHITE	Stage IV	[Not Applicable]	Muscle invasive urothelial carcinoma (pT2 or above)	High Grade	2013	[Not Available]	-23664	Alive	TUMOR FREE	469	#N/A	[Not Available]	#N/A	#N/A	#N/A	#N/A	Complete Remission/Response	#N/A	#N/A	0	469	0	469	#N/A
TCGA-GU-AATQ-01A-11R-A39I-07	8458.51	97.5651	14.0341	4.6002	0	11989.6	0	43.9263	1684.72	4.4924	0	0	0	3.5939	0.8985	0	1.7969	0	5.3908	268.643	TCGA-GU-AATQ	BLCA	68	MALE	WHITE	Stage III	[Not Applicable]	Muscle invasive urothelial carcinoma (pT2 or above)	High Grade	2013	[Not Available]	-25185	Dead	WITH TUMOR	#N/A	213	[Not Available]	#N/A	#N/A	#N/A	#N/A	Stable Disease	#N/A	#N/A	1	213	1	213	#N/A
TCGA-FD-A6TA-01A-12R-A33J-07	18286.7	2682.38	17.032	0.9893	5.6754	6638.65	226.925	321.967	1385.45	0	0.5924	0.5924	0.5924	3.5545	6.5166	0	82.346	0.5924	4.1469	2.9621	TCGA-FD-A6TA	BLCA	58	MALE	WHITE	Stage IV	[Not Applicable]	Muscle invasive urothelial carcinoma (pT2 or above)	High Grade	2009	[Not Available]	-21196	Alive	TUMOR FREE	1912	#N/A	[Not Available]	#N/A	#N/A	#N/A	#N/A	Complete Remission/Response	#N/A	#N/A	0	1912	0	1912	#N/A
TCGA-C4-A0F7-01A-11R-A084-07	481.152	2.6017	0.531	0	0.531	705.008	4.282	2.0551	146.229	1.5616	0	0	1.2493	3.4356	0	0	0	0	0	0.3123	TCGA-C4-A0F7	BLCA	77	MALE	[Not Available]	Stage IV	[Not Applicable]	Muscle invasive urothelial carcinoma (pT2 or above)	High Grade	2008	[Not Available]	-28428	Dead	WITH TUMOR	#N/A	62	[Not Available]	#N/A	#N/A	#N/A	#N/A	[Not Available]	#N/A	#N/A	1	62	1	62	#N/A
TCGA-XF-A8HI-01A-11R-A38B-07	820.623	3563.68	15.9834	12.7459	4.3574	9154.86	5.8715	94.5472	392.079	0	0.4869	0	0	3.408	21.4216	0	4.3817	0	0.9737	165.044	TCGA-XF-A8HI	BLCA	57	FEMALE	WHITE	Stage IV	[Not Applicable]	Muscle invasive urothelial carcinoma (pT2 or above)	High Grade	2005	[Not Available]	-21059	Dead	WITH TUMOR	#N/A	544	[Not Available]	Distant Metastasis	Lung	#N/A	468	Progressive Disease	#N/A	#N/A	1	544	1	544	#N/A
TCGA-XF-A9SU-01A-31R-A39I-07	3306.19	15.7705	7.9973	2.5798	0	8153.99	0	15.1392	2078.78	0	0	0	5.4311	3.3944	2.7155	0	27.8344	0	0	2.0367	TCGA-XF-A9SU	BLCA	74	FEMALE	WHITE	Stage IV	[Not Applicable]	Muscle invasive urothelial carcinoma (pT2 or above)	High Grade	2006	[Not Available]	-27068	Dead	WITH TUMOR	#N/A	182	[Not Available]	Distant Metastasis	Liver	#N/A	103	Progressive Disease	#N/A	#N/A	1	182	1	182	#N/A
TCGA-DK-A3X1-01A-12R-A22U-07	3155.77	225.077	13.4362	0	1.9195	12223	0	25.4413	735.833	11.2249	0	0	0	3.3675	0	0	0	0	1.6837	94.8506	TCGA-DK-A3X1	BLCA	78	FEMALE	WHITE	Stage III	[Not Applicable]	Muscle invasive urothelial carcinoma (pT2 or above)	High Grade	2009	[Not Available]	-28757	Alive	TUMOR FREE	2009	#N/A	[Not Available]	#N/A	#N/A	#N/A	#N/A	Complete Remission/Response	#N/A	#N/A	0	2009	0	2009	0
TCGA-XF-A9SK-01A-11R-A42T-07	1653	3.6155	0	0	0	2969.28	9.2354	1678.45	800.552	0	0	3.2769	0	3.2769	0	2.1846	921.355	1.6384	150.191	0	TCGA-XF-A9SK	BLCA	65	MALE	WHITE	Stage IV	[Not Applicable]	Muscle invasive urothelial carcinoma (pT2 or above)	High Grade	2004	[Not Available]	-24019	Dead	WITH TUMOR	#N/A	486	[Not Available]	Distant Metastasis	Bone	#N/A	382	Stable Disease	#N/A	#N/A	1	486	1	486	#N/A
TCGA-LT-A8JT-01A-11R-A36F-07	11754.2	1687.43	31.938	13.6545	0	3246.23	90.4827	2225.91	1031.39	0	4.082	0.4082	3.5514	3.2656	34.6974	0	24.9005	2.041	6.5313	0.4082	TCGA-LT-A8JT	BLCA	69	FEMALE	WHITE	Stage II	[Not Applicable]	Muscle invasive urothelial carcinoma (pT2 or above)	High Grade	2013	[Not Available]	-25498	Alive	TUMOR FREE	641	#N/A	[Not Available]	#N/A	#N/A	#N/A	#N/A	Complete Remission/Response	#N/A	#N/A	0	641	0	641	0
TCGA-BT-A0YX-01A-11R-A10U-07	5133.35	70.7193	45.7058	1.4819	6.0952	10000.7	104.749	2472.86	419.616	10.8167	1.0817	0	0	3.245	0.5408	0	2.1633	0	0	194.7	TCGA-BT-A0YX	BLCA	70	FEMALE	WHITE	Stage III	[Not Applicable]	Muscle invasive urothelial carcinoma (pT2 or above)	High Grade	2009	[Not Available]	-25570	Dead	WITH TUMOR	#N/A	400	[Not Available]	Metastatic	Other, specify	lower abdominal wall and right pelvis	326	Progressive Disease	#N/A	#N/A	1	400	1	400	#N/A
TCGA-ZF-A9RL-01A-11R-A38B-07	5853.27	916.798	13.2693	5.509	3.789	10014.9	3.8396	1230.3	589.913	5.0588	2.0235	0.5059	0.5059	3.0353	9.6117	0.5059	66.7763	0	21.247	0	TCGA-ZF-A9RL	BLCA	61	MALE	WHITE	Stage II	[Not Applicable]	Muscle invasive urothelial carcinoma (pT2 or above)	High Grade	2007	[Not Available]	-22480	Alive	TUMOR FREE	2703	#N/A	[Not Available]	Locoregional (Urothelial tumor event)	Bladder	#N/A	1064	Complete Remission/Response	#N/A	#N/A	0	2703	0	2703	1
TCGA-G2-A2ES-01A-11R-A180-07	6.4597	0	0	0	0	47.6245	0	0	0.5576	0	0	0.3743	0.3743	2.9941	0.3743	0	49.028	0	0.3743	433.018	TCGA-G2-A2ES	BLCA	85	MALE	WHITE	Stage II	[Not Applicable]	Muscle invasive urothelial carcinoma (pT2 or above)	High Grade	2009	[Not Available]	-31293	Dead	WITH TUMOR	#N/A	1004	[Not Available]	New Primary Tumor	Other, specify	#N/A	897	Progressive Disease	#N/A	#N/A	1	1004	1	1004	#N/A
TCGA-DK-A2I6-01A-12R-A18C-07	4051.49	0	1.5465	1.5171	0	5642.37	37.3123	41.5409	247.614	0	0	0	0	2.9345	0	0	0	0	9.3904	0.2935	TCGA-DK-A2I6	BLCA	81	MALE	WHITE	Stage IV	[Not Applicable]	Muscle invasive urothelial carcinoma (pT2 or above)	High Grade	2005	[Not Available]	-29789	Alive	TUMOR FREE	2656	#N/A	[Not Available]	#N/A	#N/A	#N/A	#N/A	Complete Remission/Response	#N/A	#N/A	0	2656	0	2656	#N/A
TCGA-FD-A5BZ-01A-11R-A28M-07	239.11	59.76	20.1698	0	1.8326	4189.71	11.13	1665.31	303.027	4.6838	0	0.5855	0	2.9274	0.5855	2.3419	62.6464	0	2.3419	3.5129	TCGA-FD-A5BZ	BLCA	77	FEMALE	WHITE	Stage IV	[Not Applicable]	Muscle invasive urothelial carcinoma (pT2 or above)	High Grade	2009	[Not Available]	-28451	Dead	WITH TUMOR	#N/A	835	[Not Available]	Locoregional (Urothelial tumor event)	Lymph Node Only	#N/A	533	[Not Applicable]	#N/A	#N/A	1	835	1	835	#N/A
TCGA-G2-A2EC-01A-11R-A180-07	21907.1	488.465	6.625	11.5661	11.9267	8218.93	351.593	4464.34	947.942	0.4097	1.2291	0	0	2.868	0	0	13.5204	0	7.7845	4.0971	TCGA-G2-A2EC	BLCA	58	FEMALE	BLACK OR AFRICAN AMERICAN	Stage II	[Not Applicable]	Muscle invasive urothelial carcinoma (pT2 or above)	High Grade	2010	[Not Available]	-21215	Dead	WITH TUMOR	#N/A	696	[Not Available]	Distant Metastasis	Other, specify	small bowel	679	Partial Remission/Response	#N/A	#N/A	1	696	1	696	#N/A
TCGA-DK-A1AF-01A-11R-A13Y-07	22.2776	404.047	27.72	0.5236	0.533	4165.12	0.5361	87.5649	182.03	0.3135	0	0	0.627	2.8215	0	0.9405	4.3891	0.3135	3.4485	41.3826	TCGA-DK-A1AF	BLCA	84	FEMALE	WHITE	Stage IV	[Not Applicable]	Muscle invasive urothelial carcinoma (pT2 or above)	High Grade	2010	[Not Available]	-30914	Alive	TUMOR FREE	536	#N/A	[Not Available]	Metastatic	Lymph Node Only	#N/A	283	Progressive Disease	#N/A	#N/A	0	536	0	536	#N/A
TCGA-GC-A3YS-01A-11R-A23N-07	844.593	4.5646	3.3989	0.8333	1.4888	2119.49	12.8371	4.9438	125.833	0.4682	0	0	0	2.809	0.4682	0	1.4045	0	2.3408	220.506	TCGA-GC-A3YS	BLCA	61	MALE	WHITE	Stage IV	[Not Applicable]	Muscle invasive urothelial carcinoma (pT2 or above)	High Grade	2012	[Not Available]	-22515	Alive	TUMOR FREE	758	#N/A	[Not Available]	#N/A	#N/A	#N/A	#N/A	Complete Remission/Response	#N/A	#N/A	0	758	0	758	#N/A
TCGA-GC-A3RB-01A-12R-A220-07	8655.67	36.3717	2.6723	0	0	1561.83	128.899	81.6431	575.912	0.9131	0	0.3044	0	2.7393	3.9568	0	0.3044	0	0	0.3044	TCGA-GC-A3RB	BLCA	54	MALE	WHITE	Stage III	[Not Applicable]	Muscle invasive urothelial carcinoma (pT2 or above)	High Grade	2011	[Not Available]	-20021	Alive	TUMOR FREE	582	#N/A	[Not Available]	#N/A	#N/A	#N/A	#N/A	Complete Remission/Response	#N/A	#N/A	0	582	0	582	0
TCGA-DK-AA76-01A-11R-A39I-07	7207.85	68.5634	6.1674	0	0	987.117	101.355	75.2681	520.957	1.0534	0.5267	0	0	2.6334	7.9002	0	0.5267	0	0	40.0278	TCGA-DK-AA76	BLCA	64	FEMALE	WHITE	Stage II	[Not Applicable]	Muscle invasive urothelial carcinoma (pT2 or above)	High Grade	2013	[Not Available]	-23542	Alive	WITH TUMOR	366	#N/A	[Not Available]	#N/A	#N/A	#N/A	#N/A	Complete Remission/Response	#N/A	#N/A	0	366	0	366	0
TCGA-4Z-AA7W-01A-11R-A39I-07	455.245	4.8697	2.5627	0	2.4644	2094.5	0	0	596.834	0	0	0	1.3108	2.6217	0	0	11.1421	0	11.7975	1.9662	TCGA-4Z-AA7W	BLCA	55	MALE	WHITE	Stage II	[Not Applicable]	Muscle invasive urothelial carcinoma (pT2 or above)	High Grade	2012	[Not Available]	-20424	Alive	WITH TUMOR	840	#N/A	[Not Available]	Locoregional (Urothelial tumor event)	Other, specify	Rectum	760	Complete Remission/Response	#N/A	#N/A	0	840	0	840	1
TCGA-XF-AAML-01A-11R-A42T-07	7.1168	807.305	5.3643	1.0553	2.1482	4420.22	0	0	528.775	0	0	0	0.6281	2.5126	2.5126	0	100.502	0	3.7688	20.1005	TCGA-XF-AAML	BLCA	75	MALE	WHITE	Stage II	[Not Applicable]	Muscle invasive urothelial carcinoma (pT2 or above)	High Grade	2007	[Not Available]	-27422	Dead	TUMOR FREE	#N/A	232	[Not Available]	#N/A	#N/A	#N/A	#N/A	Complete Remission/Response	#N/A	#N/A	1	232	0	232	0
TCGA-E7-A541-01A-11R-A26T-07	2110.85	41.4518	19.2569	0	3.5039	6855.84	5.3199	941.004	671.398	0	0.4921	0	0	2.4606	0	0	0	0	18.2087	16.2402	TCGA-E7-A541	BLCA	66	MALE	WHITE	Stage II	[Not Applicable]	Muscle invasive urothelial carcinoma (pT2 or above)	High Grade	2012	[Not Available]	-24206	Dead	TUMOR FREE	#N/A	778	[Not Available]	#N/A	#N/A	#N/A	#N/A	Complete Remission/Response	#N/A	#N/A	1	778	0	778	0
TCGA-XF-A8HG-01A-11R-A36F-07	0	1091.29	5.1601	6.7167	5.1601	1816.8	0	0	289.824	0	2.4514	0	0	2.4514	1.2257	0	8.5797	0.6128	0	321.74	TCGA-XF-A8HG	BLCA	69	MALE	WHITE	Stage III	[Not Applicable]	Muscle invasive urothelial carcinoma (pT2 or above)	High Grade	2005	[Not Available]	-25421	Dead	WITH TUMOR	#N/A	467	[Not Available]	Distant Metastasis	Liver	#N/A	398	Complete Remission/Response	#N/A	#N/A	1	467	1	467	1
TCGA-E7-A85H-01A-11R-A352-07	3.4829	240.933	16.3636	6.9658	1.9638	17030.6	0.6572	4.5612	683.026	1.9677	0	2.3613	1.8536	2.3613	7.4774	0	104.683	0	0.3935	5.5096	TCGA-E7-A85H	BLCA	64	MALE	ASIAN	Stage III	[Not Applicable]	Muscle invasive urothelial carcinoma (pT2 or above)	High Grade	2013	[Not Available]	-23497	Alive	TUMOR FREE	394	#N/A	[Not Available]	#N/A	#N/A	#N/A	#N/A	Complete Remission/Response	#N/A	#N/A	0	394	0	394	0
TCGA-ZF-AA52-01A-12R-A39I-07	7.1908	0	0	0	0	674.717	0	3.7338	45.2238	0	2.3557	0.5889	0	2.3557	0	0	67.7267	0	2.9446	1.7668	TCGA-ZF-AA52	BLCA	70	MALE	WHITE	Stage III	[Not Applicable]	Muscle invasive urothelial carcinoma (pT2 or above)	High Grade	2009	[Not Available]	-25579	Dead	#N/A	#N/A	1077	[Not Available]	#N/A	#N/A	#N/A	#N/A	Partial Remission/Response	#N/A	#N/A	1	1077	#N/A	1077	#N/A
TCGA-K4-A3WU-01B-11R-A23N-07	278.459	11.0993	16.644	0	1.0563	1368.4	0	17.8469	135.508	1.9993	0.3332	0.3332	0.6664	2.3325	0.3332	3.6653	16.6607	0	5.3314	16.3274	TCGA-K4-A3WU	BLCA	87	MALE	WHITE	Stage III	[Not Applicable]	Muscle invasive urothelial carcinoma (pT2 or above)	High Grade	2012	[Not Available]	-32134	Alive	TUMOR FREE	105	#N/A	[Not Available]	#N/A	#N/A	#N/A	#N/A	[Not Applicable]	#N/A	#N/A	0	105	0	105	#N/A
TCGA-CF-A27C-01A-11R-A16R-07	1576.15	1079.72	7.2135	10.5061	12.0186	5928.18	4.8633	1218.46	802.024	0.7756	0	0	0	2.3269	5.0417	0	0.7756	0	31.0258	0	TCGA-CF-A27C	BLCA	52	MALE	ASIAN	Stage III	[Not Applicable]	Muscle invasive urothelial carcinoma (pT2 or above)	High Grade	2011	[Not Available]	-19270	Alive	TUMOR FREE	425	#N/A	[Not Available]	#N/A	#N/A	#N/A	#N/A	Complete Remission/Response	#N/A	#N/A	0	425	0	425	0
TCGA-BL-A5ZZ-01A-31R-A30C-07	6.6095	2.6676	0	0	0	352.347	0	3.2864	19.1913	1.3751	0	0.9167	0	2.2918	0	3.2085	4.1252	2.2918	463.397	0.4584	TCGA-BL-A5ZZ	BLCA	80	FEMALE	WHITE	Stage III	[Not Applicable]	Muscle invasive urothelial carcinoma (pT2 or above)	High Grade	2012	[Not Available]	-29247	Alive	WITH TUMOR	377	#N/A	[Not Available]	Distant Metastasis	Lung	#N/A	242	Complete Remission/Response	#N/A	#N/A	0	377	0	377	1
TCGA-E7-A4XJ-01A-11R-A26T-07	4.2101	51.62	8.1054	5.1986	0	7938.43	0	15.2956	406.934	0	21.2338	0.7322	0	2.1966	0	0	250.412	0	0	0	TCGA-E7-A4XJ	BLCA	66	MALE	ASIAN	Stage II	[Not Applicable]	Muscle invasive urothelial carcinoma (pT2 or above)	High Grade	2012	[Not Available]	-24279	Dead	TUMOR FREE	#N/A	68	[Not Available]	#N/A	#N/A	#N/A	#N/A	Complete Remission/Response	#N/A	#N/A	1	68	0	68	0
TCGA-XF-A8HD-01A-11R-A36F-07	0	21.6193	0.6163	1.1196	0	397.768	0	0	36.2071	0.7294	0	0	0.3647	2.1882	0	0	25.1641	0	26.6229	62.3632	TCGA-XF-A8HD	BLCA	77	MALE	WHITE	Stage III	[Not Applicable]	Muscle invasive urothelial carcinoma (pT2 or above)	High Grade	2006	[Not Available]	-28305	Alive	TUMOR FREE	2964	#N/A	[Not Available]	#N/A	#N/A	#N/A	#N/A	Complete Remission/Response	#N/A	#N/A	0	2964	0	2964	0
TCGA-LC-A66R-01A-41R-A30C-07	0	8.7083	0	0	0	1320.86	0	0	171.887	0	0	0	0	2.1771	0	0	0	0	7.2569	1.4514	TCGA-LC-A66R	BLCA	78	MALE	WHITE	Stage IV	[Not Applicable]	Muscle invasive urothelial carcinoma (pT2 or above)	High Grade	2012	[Not Available]	-28793	Alive	TUMOR FREE	466	#N/A	[Not Available]	#N/A	#N/A	#N/A	#N/A	Complete Remission/Response	#N/A	#N/A	0	466	0	466	#N/A
TCGA-CF-A3MF-01A-12R-A21D-07	100.673	16.3285	13.2768	6.4106	9.9603	2656.91	0	34.4265	453.139	0	24.3709	4.2384	3.1788	2.1192	1.0596	1.0596	147.285	0	0	1.0596	TCGA-CF-A3MF	BLCA	34	MALE	ASIAN	Stage III	[Not Applicable]	Muscle invasive urothelial carcinoma (pT2 or above)	Low Grade	2011	[Not Available]	-12557	Alive	TUMOR FREE	383	#N/A	[Not Available]	#N/A	#N/A	#N/A	#N/A	Complete Remission/Response	#N/A	#N/A	0	383	0	383	0
TCGA-XF-AAN1-01A-31R-A42T-07	168.705	112.777	2.4307	1.1773	0	3946.28	1.1981	2848.64	663.255	0	0	0	0	2.0776	0	0	43.6288	0	17.313	4.1551	TCGA-XF-AAN1	BLCA	75	FEMALE	[Unknown]	Stage III	[Not Applicable]	Muscle invasive urothelial carcinoma (pT2 or above)	High Grade	2006	[Not Available]	-27687	Dead	WITH TUMOR	#N/A	941	[Not Available]	Locoregional (Urothelial tumor event)	Other, specify	Pelvis and vagina	650	Partial Remission/Response	#N/A	#N/A	1	941	1	941	#N/A
TCGA-BT-A20O-01A-21R-A14Y-07	87.9484	17.9901	0.7888	0	0	400.647	3.0085	1967.85	225.347	0	0	0	0	2.0225	0	0.5056	0	0	13.6519	155.732	TCGA-BT-A20O	BLCA	75	MALE	WHITE	Stage III	[Not Applicable]	Muscle invasive urothelial carcinoma (pT2 or above)	High Grade	2003	[Not Available]	-27534	Dead	WITH TUMOR	#N/A	370	[Not Available]	Locoregional (Urothelial tumor event)	Lymph Node Only	#N/A	315	Progressive Disease	#N/A	#N/A	1	370	1	370	#N/A
TCGA-G2-AA3D-01A-11R-A39I-07	2.8805	205.046	11.784	2.669	0.9065	6587.55	0	3.51	889.044	0	0.5036	0	1.0072	2.0144	7.0502	0.5036	15.1076	0	15.6112	5.5395	TCGA-G2-AA3D	BLCA	60	MALE	WHITE	Stage IV	[Not Applicable]	Muscle invasive urothelial carcinoma (pT2 or above)	High Grade	2009	[Not Available]	-22205	Alive	TUMOR FREE	2139	#N/A	[Not Available]	#N/A	#N/A	#N/A	#N/A	Complete Remission/Response	#N/A	#N/A	0	2139	0	2139	#N/A
TCGA-DK-A1AE-01A-11R-A13Y-07	5767.97	66.6202	9.6294	4.1516	1.2622	6147.49	171.014	1848.01	938.158	675.118	2.7863	0	0.8359	1.9504	3.3435	0.2786	1.1145	0	1.9504	59.348	TCGA-DK-A1AE	BLCA	84	MALE	WHITE	Stage III	[Not Applicable]	Muscle invasive urothelial carcinoma (pT2 or above)	High Grade	2010	[Not Available]	-30707	Alive	WITH TUMOR	491	#N/A	[Not Available]	Metastatic	Bone	#N/A	211	Progressive Disease	#N/A	#N/A	0	491	0	491	#N/A
TCGA-GC-A3RD-01A-12R-A22U-07	4138.73	222.15	2.9767	14.4747	2.3833	3717.89	149.484	113.59	567.792	3.8911	0	0	0.9728	1.9455	8.7549	0.4864	0.4864	0	0.9728	0.9728	TCGA-GC-A3RD	BLCA	83	FEMALE	WHITE	Stage III	[Not Applicable]	Muscle invasive urothelial carcinoma (pT2 or above)	High Grade	2011	[Not Available]	-30529	Alive	TUMOR FREE	428	#N/A	[Not Available]	#N/A	#N/A	#N/A	#N/A	Complete Remission/Response	#N/A	#N/A	0	428	0	428	0
TCGA-5N-A9KM-01A-11R-A42T-07	544.248	436.966	12.5	1.8301	0	12439.3	67.2233	9083.09	2108.54	0	2.9126	0	0	1.9417	0	0	53.8835	0	1.9417	0	TCGA-5N-A9KM	BLCA	73	FEMALE	WHITE	Stage III	[Not Applicable]	Muscle invasive urothelial carcinoma (pT2 or above)	High Grade	2012	[Not Available]	-26906	Dead	WITH TUMOR	#N/A	530	[Not Available]	#N/A	#N/A	#N/A	276	Complete Remission/Response	#N/A	#N/A	1	530	1	530	1
TCGA-DK-A6AV-01A-12R-A30C-07	7063.19	10.2535	6.5526	19.0114	0	2081	110.735	53.6502	539.005	0.6337	0.6337	1.9011	0	1.9011	7.6046	16.4766	5.7034	1.2674	0.6337	1.2674	TCGA-DK-A6AV	BLCA	82	FEMALE	ASIAN	Stage II	[Not Applicable]	Muscle invasive urothelial carcinoma (pT2 or above)	High Grade	2008	[Not Available]	-30089	Alive	TUMOR FREE	1952	#N/A	[Not Available]	#N/A	#N/A	#N/A	#N/A	Complete Remission/Response	#N/A	#N/A	0	1952	0	1952	0
TCGA-ZF-AA4W-01A-12R-A38B-07	47.1726	7.011	0	0	0	53.2253	0	62.8391	48.001	14.2198	0	0.6183	0	1.8548	0	0	1.2365	0	1.8548	337.565	TCGA-ZF-AA4W	BLCA	56	MALE	WHITE	Stage III	[Not Applicable]	Muscle invasive urothelial carcinoma (pT2 or above)	High Grade	2009	[Not Available]	-20611	Alive	#N/A	1830	#N/A	[Not Available]	Locoregional (Urothelial tumor event)	Other, specify	penile urethra	1679	Complete Remission/Response	#N/A	#N/A	0	1830	0	1830	1
TCGA-4Z-AA7N-01A-11R-A39I-07	347.093	96.9085	5.0653	0	2.6408	814.971	2.6769	250.482	5.1645	1.8026	0	0	1.8026	1.8026	1.8026	0	31.5457	0	0.9013	57.6836	TCGA-4Z-AA7N	BLCA	65	MALE	WHITE	Stage III	[Not Applicable]	Muscle invasive urothelial carcinoma (pT2 or above)	High Grade	2010	[Not Available]	-24090	Dead	TUMOR FREE	#N/A	1367	[Not Available]	#N/A	#N/A	#N/A	#N/A	Complete Remission/Response	#N/A	#N/A	1	1367	0	1367	0
TCGA-CF-A1HS-01A-11R-A13Y-07	164.298	5.2301	0	0	0	247.89	0	1.6736	52.5164	0.5977	0	0	0	1.7932	0	0	0	0.5977	79.4979	0.5977	TCGA-CF-A1HS	BLCA	75	FEMALE	ASIAN	Stage III	[Not Applicable]	Muscle invasive urothelial carcinoma (pT2 or above)	High Grade	2010	[Not Available]	-27565	Alive	WITH TUMOR	382	#N/A	[Not Available]	Distant Metastasis	Other, specify	Pelvis	133	Complete Remission/Response	#N/A	#N/A	0	382	0	382	1
TCGA-ZF-AA4N-01A-11R-A38B-07	12084.2	30.7868	6.1656	10.1057	1.0276	6248.2	10.3464	74.1574	1064.65	0	0	0.5872	0	1.7616	0	4.1104	1.7616	0	0	60.4815	TCGA-ZF-AA4N	BLCA	74	MALE	WHITE	Stage II	[Not Applicable]	[Not Available]	High Grade	2011	[Not Available]	-27056	Dead	WITH TUMOR	#N/A	88	[Not Available]	#N/A	#N/A	#N/A	#N/A	Progressive Disease	#N/A	#N/A	1	88	1	88	#N/A
TCGA-K4-A83P-01A-11R-A352-07	41.142	282.945	2.1186	3.5727	1.2211	1772.06	1.4196	376.444	98.059	0.4315	0	0	0	1.7259	1.2945	0	3.0204	0	4.3148	37.9706	TCGA-K4-A83P	BLCA	77	MALE	WHITE	Stage IV	[Not Applicable]	Muscle invasive urothelial carcinoma (pT2 or above)	[Unknown]	2013	[Not Available]	-28463	Alive	WITH TUMOR	495	#N/A	[Not Available]	Distant Metastasis	Liver	#N/A	70	Partial Remission/Response	#N/A	#N/A	0	495	0	495	#N/A
TCGA-BT-A20P-01A-11R-A14Y-07	5422.5	32.4608	3.3031	19.0339	9.9174	10419.7	60.3716	1717.01	2881.36	0	0	0	0	1.6515	1.6515	0	0	0	7.4319	17.341	TCGA-BT-A20P	BLCA	81	FEMALE	WHITE	Stage III	[Not Applicable]	Muscle invasive urothelial carcinoma (pT2 or above)	High Grade	2005	[Not Available]	-29634	Dead	#N/A	#N/A	544	[Not Available]	#N/A	#N/A	#N/A	#N/A	[Not Available]	#N/A	#N/A	1	544	#N/A	544	#N/A
TCGA-CU-A72E-01A-12R-A33J-07	3944.98	37.1599	21.3399	3.5923	0.7316	7670	31.7468	31.9236	812.565	3.2881	0	1.6441	0.411	1.6441	2.8771	6.5762	73.1607	2.8771	0	6.5762	TCGA-CU-A72E	BLCA	76	MALE	WHITE	Stage IV	[Not Applicable]	Muscle invasive urothelial carcinoma (pT2 or above)	High Grade	2013	[Not Available]	-27963	Dead	WITH TUMOR	#N/A	413	[Not Available]	New Primary Tumor	Lymph Node Only	#N/A	256	Partial Remission/Response	#N/A	#N/A	1	413	1	413	#N/A
TCGA-DK-A3WX-01A-22R-A22U-07	1.2299	0	0	0	0	2.3821	0	0	5.3731	0.8172	0	0	0	1.6344	0	0	0.4086	8.5805	420.038	15.9353	TCGA-DK-A3WX	BLCA	67	FEMALE	WHITE	Stage III	[Not Applicable]	Muscle invasive urothelial carcinoma (pT2 or above)	High Grade	2011	[Not Available]	-24553	Dead	WITH TUMOR	#N/A	321	[Not Available]	Locoregional (Urothelial tumor event)	Bladder	#N/A	167	Progressive Disease	#N/A	#N/A	1	321	1	321	#N/A
TCGA-FD-A62S-01A-11R-A30C-07	1214.13	13.5878	0.6434	0	0.6434	805.746	1.2949	64.5188	114.126	1.2216	0	0	0	1.6287	0	0.4072	0.4072	0	8.9581	2.0359	TCGA-FD-A62S	BLCA	60	FEMALE	BLACK OR AFRICAN AMERICAN	Stage III	[Not Applicable]	Muscle invasive urothelial carcinoma (pT2 or above)	High Grade	2013	[Not Available]	-22000	Dead	WITH TUMOR	#N/A	406	[Not Available]	Distant Metastasis	Other, specify	sigmoid colon	306	Progressive Disease	#N/A	#N/A	1	406	1	406	#N/A
TCGA-FD-A5BU-01A-31R-A26T-07	26.5051	1.5503	0	0.8258	0	4585.75	438.466	0	232.467	0	0	0	0	1.5983	0	0.5328	0	0	3.7294	1.5983	TCGA-FD-A5BU	BLCA	76	FEMALE	BLACK OR AFRICAN AMERICAN	Stage II	[Not Applicable]	Muscle invasive urothelial carcinoma (pT2 or above)	High Grade	2012	[Not Available]	-27882	Alive	TUMOR FREE	588	#N/A	[Not Available]	#N/A	#N/A	#N/A	#N/A	Complete Remission/Response	#N/A	#N/A	0	588	0	588	0
TCGA-XF-A9T0-01A-11R-A39I-07	0	10.712	8.5707	0	1.7163	3721.56	0	0	278.167	0	0	0	0	1.594	1.594	0	116.366	0	0.5313	1.0627	TCGA-XF-A9T0	BLCA	68	MALE	WHITE	Stage III	[Not Applicable]	Muscle invasive urothelial carcinoma (pT2 or above)	High Grade	2007	[Not Available]	-25190	Alive	TUMOR FREE	799	#N/A	[Not Available]	#N/A	#N/A	#N/A	#N/A	Complete Remission/Response	#N/A	#N/A	0	799	0	799	0
TCGA-GU-A767-01A-11R-A32O-07	1495.12	30.5913	0.9576	0	0	2516.22	8.6552	12.067	473.799	12.0356	0	0	0.5233	1.5699	3.663	1.0466	0	0	4.7096	0.5233	TCGA-GU-A767	BLCA	81	MALE	WHITE	Stage IV	[Not Applicable]	Muscle invasive urothelial carcinoma (pT2 or above)	High Grade	2012	[Not Available]	-29739	Dead	WITH TUMOR	#N/A	144	[Not Available]	#N/A	#N/A	#N/A	#N/A	Progressive Disease	#N/A	#N/A	1	144	1	144	#N/A
TCGA-FD-A3B3-01A-12R-A206-07	4.3499	0.9774	0	0	0	104.6	6.0754	2.5792	3.5897	0	0	0	0	1.5083	0	0	0.3017	8.4465	7.5415	15.6863	TCGA-FD-A3B3	BLCA	74	FEMALE	WHITE	Stage III	[Not Applicable]	Muscle invasive urothelial carcinoma (pT2 or above)	High Grade	2011	[Not Available]	-27068	Dead	TUMOR FREE	#N/A	974	[Not Available]	#N/A	#N/A	#N/A	#N/A	Complete Remission/Response	#N/A	#N/A	1	974	0	974	0
TCGA-C4-A0F6-01A-11R-A10U-07	664.218	22.585	18.702	4.0449	4.1552	1397.84	0	5.6702	86.8616	2.9417	0	0	0.7354	1.4709	0	0.7354	0.7354	0	0.7354	52.9509	TCGA-C4-A0F6	BLCA	82	FEMALE	[Not Available]	Stage III	[Not Applicable]	Muscle invasive urothelial carcinoma (pT2 or above)	High Grade	2008	[Not Available]	-29951	Alive	TUMOR FREE	700	#N/A	[Not Available]	#N/A	#N/A	#N/A	#N/A	[Not Available]	#N/A	#N/A	0	700	0	700	#N/A
TCGA-C4-A0EZ-01A-21R-A24X-07	0	2.4415	0	0	0	187.429	0	0	28.9454	1.4686	0	0	0.3671	1.4686	0	0.7343	0.3671	1.4686	0	658.284	TCGA-C4-A0EZ	BLCA	69	FEMALE	[Not Available]	Stage IV	[Not Applicable]	Muscle invasive urothelial carcinoma (pT2 or above)	High Grade	2006	[Not Available]	-25202	Dead	WITH TUMOR	#N/A	273	[Not Available]	#N/A	#N/A	#N/A	#N/A	Partial Remission/Response	#N/A	#N/A	1	273	1	273	#N/A
TCGA-XF-A9T6-01A-11R-A42T-07	1.578	4.821	1.0939	1.0697	0	920.316	0	3.1414	206.926	0	0	0	0	1.4521	0	0	22.7498	0	1.9362	6.2925	TCGA-XF-A9T6	BLCA	88	FEMALE	WHITE	Stage III	[Not Applicable]	Muscle invasive urothelial carcinoma (pT2 or above)	High Grade	2008	[Not Available]	-32207	Alive	#N/A	64	#N/A	[Not Available]	#N/A	#N/A	#N/A	#N/A	[Unknown]	#N/A	#N/A	0	64	0	64	#N/A
TCGA-E7-A97P-01A-11R-A38B-07	145.58	6.7244	0.7792	1.5392	0	423.507	0	0	18.3165	0	0	0.481	0	1.443	0	2.405	2.405	0.481	19.721	2.886	TCGA-E7-A97P	BLCA	73	MALE	ASIAN	Stage II	[Not Applicable]	Muscle invasive urothelial carcinoma (pT2 or above)	High Grade	2013	[Not Available]	-26956	Dead	TUMOR FREE	#N/A	437	[Not Available]	#N/A	#N/A	#N/A	#N/A	Complete Remission/Response	#N/A	#N/A	1	437	0	437	0
TCGA-BT-A42F-01A-11R-A23W-07	0	0	0	0	0	32.059	0	4.0799	0	0	0	0	0	1.4265	0	0	0.4755	0.4755	0.951	0.4755	TCGA-BT-A42F	BLCA	64	MALE	WHITE	Stage IV	[Not Applicable]	Muscle invasive urothelial carcinoma (pT2 or above)	High Grade	2011	[Not Available]	-23713	Alive	TUMOR FREE	864	#N/A	[Not Available]	#N/A	#N/A	#N/A	#N/A	Complete Remission/Response	#N/A	#N/A	0	864	0	864	#N/A
TCGA-CF-A3MG-01A-11R-A20F-07	4871.27	744.938	13.2654	0	1.4692	7553.26	4.3886	296.194	551.232	0	0	0	0	1.4218	16.5877	0.4739	20.3791	0	1.8957	0	TCGA-CF-A3MG	BLCA	48	MALE	ASIAN	Stage II	[Not Applicable]	Muscle invasive urothelial carcinoma (pT2 or above)	Low Grade	2011	[Not Available]	-17600	Alive	TUMOR FREE	369	#N/A	[Not Available]	#N/A	#N/A	#N/A	#N/A	Complete Remission/Response	#N/A	#N/A	0	369	0	369	0
TCGA-XF-A9T4-01A-11R-A39I-07	216.025	11.8134	0	0.8311	0.8537	703.234	0.4636	3112.93	172.365	0	0	0.2827	0.2827	1.4134	0.2827	0	0.5654	0	0.2827	1.4134	TCGA-XF-A9T4	BLCA	48	MALE	WHITE	Stage IV	[Not Applicable]	Muscle invasive urothelial carcinoma (pT2 or above)	High Grade	2008	[Not Available]	-17728	Dead	WITH TUMOR	#N/A	495	[Not Available]	Distant Metastasis	Lung	#N/A	182	Partial Remission/Response	#N/A	#N/A	1	495	1	495	#N/A
TCGA-BL-A3JM-01A-12R-A21D-07	0	3.934	2.5323	22.1915	9.2862	0	0	0.8076	6.1461	0.2738	0	0	0	1.3688	0	0.2738	0	0	3.0114	1.0951	TCGA-BL-A3JM	BLCA	62	MALE	WHITE	Stage III	[Not Applicable]	Muscle invasive urothelial carcinoma (pT2 or above)	High Grade	2010	[Not Available]	-23000	Dead	WITH TUMOR	#N/A	205	[Not Available]	Metastatic	Bone	#N/A	111	Progressive Disease	#N/A	#N/A	1	205	1	205	#N/A
TCGA-CF-A8HY-01A-11R-A36F-07	965.44	0	0	0	0	16231.4	0	1220.08	2790.36	0	2.7267	0	4.7716	1.3633	94.7512	0	4.09	0	3.4083	2.7267	TCGA-CF-A8HY	BLCA	59	MALE	ASIAN	Stage II	[Not Applicable]	Muscle invasive urothelial carcinoma (pT2 or above)	High Grade	2013	[Not Available]	-21636	Alive	TUMOR FREE	345	#N/A	[Not Available]	#N/A	#N/A	#N/A	#N/A	Complete Remission/Response	#N/A	#N/A	0	345	0	345	0
TCGA-4Z-AA7O-01A-31R-A39I-07	9592.95	28.5087	0	6.8429	2.3541	1949.02	119.169	75.9302	1077.1	1.33	0	0	4.655	1.33	2.66	0.665	0	0	8.6451	1.33	TCGA-4Z-AA7O	BLCA	64	MALE	BLACK OR AFRICAN AMERICAN	Stage II	[Not Applicable]	Muscle invasive urothelial carcinoma (pT2 or above)	High Grade	2013	[Not Available]	-23645	Alive	TUMOR FREE	512	#N/A	[Not Available]	#N/A	#N/A	#N/A	#N/A	Complete Remission/Response	#N/A	#N/A	0	512	0	512	0
TCGA-4Z-AA7Q-01A-11R-A39I-07	2810.87	45.053	4.2649	12.4437	6.404	1531.29	377.464	40.7152	562.212	0.6623	0	0	0	1.3245	1.3245	1.9868	4.6358	0	4.6358	20.5298	TCGA-4Z-AA7Q	BLCA	79	MALE	WHITE	Stage III	[Not Applicable]	Muscle invasive urothelial carcinoma (pT2 or above)	High Grade	2012	[Not Available]	-28981	Dead	TUMOR FREE	#N/A	510	[Not Available]	#N/A	#N/A	#N/A	#N/A	[Not Applicable]	#N/A	#N/A	1	510	0	510	#N/A
TCGA-E7-A8O8-01A-11R-A36F-07	1907.97	6.6878	0	0	0	5308.66	2.2799	14.8765	180.051	0	0	0	0	1.2666	0.6333	0	3.1666	0	0.6333	0	TCGA-E7-A8O8	BLCA	59	MALE	ASIAN	Stage II	[Not Applicable]	Muscle invasive urothelial carcinoma (pT2 or above)	High Grade	2013	[Not Available]	-21629	Alive	TUMOR FREE	13	#N/A	[Not Available]	#N/A	#N/A	#N/A	#N/A	Complete Remission/Response	#N/A	#N/A	0	13	0	13	0
TCGA-BT-A20V-01A-11R-A14Y-07	3.6133	5.7011	3.1686	0	4.2248	982.057	0	13.3292	60.1791	0	0	0	0	1.2353	0	0	0.6177	45.0896	4.3237	232.86	TCGA-BT-A20V	BLCA	59	FEMALE	BLACK OR AFRICAN AMERICAN	Stage IV	[Not Applicable]	Muscle invasive urothelial carcinoma (pT2 or above)	High Grade	2008	[Not Available]	-21551	Dead	#N/A	#N/A	154	[Not Available]	#N/A	#N/A	#N/A	#N/A	[Not Available]	#N/A	#N/A	1	154	#N/A	154	#N/A
TCGA-CF-A3MH-01A-11R-A20F-07	9930.98	485.974	3.0454	4.4074	9.1322	5049.99	163.491	2381.57	1226.93	0.4018	0	0	0.8035	1.2053	2.8124	0	18.4813	0	1.2053	14.4636	TCGA-CF-A3MH	BLCA	75	MALE	ASIAN	Stage II	[Not Applicable]	Muscle invasive urothelial carcinoma (pT2 or above)	Low Grade	2011	[Not Available]	-27458	Alive	TUMOR FREE	398	#N/A	[Not Available]	#N/A	#N/A	#N/A	#N/A	Complete Remission/Response	#N/A	#N/A	0	398	0	398	0
TCGA-XF-A8HH-01A-11R-A38B-07	0	24.9943	3.4783	5.0801	1.7391	1661.02	0	0	184.691	4.0046	0	2.2883	0	1.1442	0	4.5767	0	0.5721	2.8604	0	TCGA-XF-A8HH	BLCA	61	FEMALE	WHITE	Stage IV	[Not Applicable]	Muscle invasive urothelial carcinoma (pT2 or above)	High Grade	2004	[Not Available]	-22393	Dead	WITH TUMOR	#N/A	57	[Not Available]	#N/A	#N/A	#N/A	#N/A	Partial Remission/Response	#N/A	#N/A	1	57	1	57	#N/A
TCGA-2F-A9KT-01A-11R-A38B-07	213.115	53.55	2.2046	4.2679	2.2046	1405	2.2329	1895.89	529.503	0	6.2182	0	0	1.1306	0	0	5.0876	0	0	14.6976	TCGA-2F-A9KT	BLCA	83	MALE	WHITE	Stage II	[Not Applicable]	Muscle invasive urothelial carcinoma (pT2 or above)	High Grade	2006	[Not Available]	-30520	Alive	TUMOR FREE	3314	#N/A	[Not Available]	#N/A	#N/A	#N/A	#N/A	Complete Remission/Response	#N/A	#N/A	0	3314	0	3314	0
TCGA-UY-A9PB-01A-11R-A38B-07	0	0	0	3.2677	0	52.9384	0	0	0	0	0.551	2.2042	0	1.1021	0	0.551	38.0218	0	4.4083	90.3706	TCGA-UY-A9PB	BLCA	49	MALE	WHITE	Stage III	[Not Applicable]	Muscle invasive urothelial carcinoma (pT2 or above)	High Grade	#N/A	[Not Available]	-17885	Alive	TUMOR FREE	899	#N/A	[Not Available]	#N/A	#N/A	#N/A	#N/A	Complete Remission/Response	#N/A	#N/A	0	899	0	899	0
TCGA-XF-AAN0-01A-11R-A42T-07	13.0605	17.0771	0	0	1.6045	101.112	0	33.4553	20.9417	0	0	0	0.3622	1.0866	1.4488	0	23.9044	0	1.8109	135.82	TCGA-XF-AAN0	BLCA	68	MALE	WHITE	Stage IV	[Not Applicable]	Muscle invasive urothelial carcinoma (pT2 or above)	High Grade	2007	[Not Available]	-24877	Dead	WITH TUMOR	#N/A	1718	[Not Available]	Locoregional (Urothelial tumor event)	Other, specify	Scrotum and Perineum	603	Complete Remission/Response	#N/A	#N/A	1	1718	1	1718	#N/A
TCGA-XF-A9T3-01A-11R-A42T-07	0	0	0	0	0	86.0764	0	0	11.4846	1.0604	0	0	0	1.0604	0	0	0	0	9.544	1.0604	TCGA-XF-A9T3	BLCA	69	FEMALE	WHITE	Stage IV	[Not Applicable]	Muscle invasive urothelial carcinoma (pT2 or above)	High Grade	2008	[Not Available]	-25532	Alive	TUMOR FREE	68	#N/A	[Not Available]	#N/A	#N/A	#N/A	#N/A	[Unknown]	#N/A	#N/A	0	68	0	68	#N/A
TCGA-XF-A9SW-01A-11R-A42T-07	0	0	0	0	0	90.3427	0	0	0	0	0	2.0768	0	1.0384	0	1.0384	57.1132	0	13.4995	5.1921	TCGA-XF-A9SW	BLCA	85	MALE	WHITE	Stage IV	[Not Applicable]	Muscle invasive urothelial carcinoma (pT2 or above)	High Grade	2006	[Not Available]	-31049	Dead	WITH TUMOR	#N/A	362	[Not Available]	#N/A	#N/A	#N/A	#N/A	Partial Remission/Response	#N/A	#N/A	1	362	1	362	#N/A
TCGA-DK-A3IQ-01A-31R-A32Y-07	5940.46	162.831	13.759	4.9949	1.7179	3678.28	5.2256	55.4513	378.308	0	0.5128	5.1282	0	1.0256	0	1.0256	215.897	0	4.1026	12.8205	TCGA-DK-A3IQ	BLCA	74	MALE	WHITE	Stage III	[Not Applicable]	Muscle invasive urothelial carcinoma (pT2 or above)	High Grade	2011	[Not Available]	-27194	Dead	WITH TUMOR	#N/A	539	[Not Available]	Locoregional (Urothelial tumor event)	Lymph Node Only	#N/A	250	Complete Remission/Response	#N/A	#N/A	1	539	1	539	1
TCGA-DK-A2HX-01A-12R-A18C-07	2.2473	0	0	0	0	2.6297	0	1.107	0	0	0	0.6649	0	0.9973	0	0	83.1117	0	0.3324	1.9947	TCGA-DK-A2HX	BLCA	80	FEMALE	WHITE	Stage IV	[Not Applicable]	Muscle invasive urothelial carcinoma (pT2 or above)	High Grade	2010	[Not Available]	-29332	Dead	TUMOR FREE	#N/A	1420	[Not Available]	#N/A	#N/A	#N/A	#N/A	[Not Available]	#N/A	#N/A	1	1420	0	1420	#N/A
TCGA-YC-A89H-01A-11R-A36F-07	0	424.5	6.495	3.1565	3.2475	5096.43	0	0	350.497	1.9159	0.479	0	0	0.958	0	0.479	0.958	0	0	0	TCGA-YC-A89H	BLCA	78	FEMALE	WHITE	Stage II	[Not Applicable]	Muscle invasive urothelial carcinoma (pT2 or above)	High Grade	2013	[Not Available]	-28741	Alive	TUMOR FREE	573	#N/A	[Not Available]	#N/A	#N/A	#N/A	#N/A	Complete Remission/Response	#N/A	#N/A	0	573	0	573	0
TCGA-BT-A3PJ-01A-21R-A220-07	21.7379	0	0	0	0	45.8642	0	0	0	0	0	0	0	0.9566	0	0	0	0.6378	16.5816	557.398	TCGA-BT-A3PJ	BLCA	76	MALE	WHITE	Stage III	[Not Applicable]	Muscle invasive urothelial carcinoma (pT2 or above)	High Grade	2011	[Not Available]	-27821	Alive	TUMOR FREE	789	#N/A	[Not Available]	#N/A	#N/A	#N/A	#N/A	Complete Remission/Response	#N/A	#N/A	0	789	0	789	0
TCGA-DK-A1A5-01A-11R-A13Y-07	9469.16	62.2886	10.1653	0	2.7718	2894.96	86.0076	81.9421	352.339	0	0	0.3179	0.3179	0.9536	0.3179	0	10.4895	0	110.617	0.3179	TCGA-DK-A1A5	BLCA	79	MALE	WHITE	Stage II	[Not Applicable]	Muscle invasive urothelial carcinoma (pT2 or above)	High Grade	2010	[Not Available]	-29111	Dead	TUMOR FREE	#N/A	65	[Not Available]	#N/A	#N/A	#N/A	#N/A	Complete Remission/Response	#N/A	#N/A	1	65	0	65	0
TCGA-XF-A9SV-01A-21R-A42T-07	0	1171.05	9.2877	0	0	3282.84	0	0	249.06	0.9497	0	0	0	0.9497	2.849	0	0.9497	0	2.849	0	TCGA-XF-A9SV	BLCA	82	MALE	WHITE	Stage IV	[Not Applicable]	Muscle invasive urothelial carcinoma (pT2 or above)	High Grade	2006	[Not Available]	-30265	Dead	WITH TUMOR	#N/A	388	[Not Available]	Distant Metastasis	Lung	#N/A	237	Progressive Disease	#N/A	#N/A	1	388	1	388	#N/A
TCGA-XF-AAN8-01A-11R-A42T-07	74.8433	3.5138	0	0	0	330.769	3.6182	0	18.4046	0	0	0	0	0.9497	0	2.849	0.9497	0	0.9497	0.9497	TCGA-XF-AAN8	BLCA	74	FEMALE	WHITE	Stage III	[Not Applicable]	Muscle invasive urothelial carcinoma (pT2 or above)	High Grade	2007	[Not Available]	-27309	Dead	#N/A	#N/A	118	[Not Available]	#N/A	#N/A	#N/A	#N/A	[Unknown]	#N/A	#N/A	1	118	#N/A	118	#N/A
TCGA-DK-A3WW-01A-22R-A23N-07	26.2429	0	0	0	0	136.817	51.2619	0	11.0104	2.8463	0	0	0	0.9488	0	0	0.4744	0	7.1157	149.431	TCGA-DK-A3WW	BLCA	57	MALE	WHITE	Stage III	[Not Applicable]	Muscle invasive urothelial carcinoma (pT2 or above)	High Grade	2011	[Not Available]	-20909	Alive	TUMOR FREE	633	#N/A	[Not Available]	#N/A	#N/A	#N/A	#N/A	Complete Remission/Response	#N/A	#N/A	0	633	0	633	0
TCGA-XF-A9T2-01A-11R-A42T-07	0	1.0462	0	0	0	4.6089	0	0	0	0	0	0	0	0.9425	0	0	0	0	0.9425	0	TCGA-XF-A9T2	BLCA	54	MALE	WHITE	Stage III	[Not Applicable]	Muscle invasive urothelial carcinoma (pT2 or above)	High Grade	2007	[Not Available]	-19945	Dead	#N/A	#N/A	575	[Not Available]	#N/A	#N/A	#N/A	#N/A	[Unknown]	#N/A	#N/A	1	575	#N/A	575	#N/A
TCGA-4Z-AA7Y-01A-11R-A39I-07	46.7279	2167.02	11.7164	3.6117	2.1983	14649.9	1.4732	215.613	532.786	0.9179	0	0	0.4589	0.9179	3.2125	0	2.7536	0	1.3768	4.5893	TCGA-4Z-AA7Y	BLCA	60	MALE	WHITE	Stage II	[Not Applicable]	Muscle invasive urothelial carcinoma (pT2 or above)	High Grade	2010	[Not Available]	-22056	Alive	TUMOR FREE	1522	#N/A	[Not Available]	#N/A	#N/A	#N/A	#N/A	Complete Remission/Response	#N/A	#N/A	0	1522	0	1522	0
TCGA-KQ-A41S-01A-12R-A33J-07	2.5766	13.1081	0.7342	0	0	268.194	0	131.342	11.973	0	0	0	0	0.9009	0.4505	0	8.1081	0	1.8018	94.1441	TCGA-KQ-A41S	BLCA	87	FEMALE	WHITE	Stage III	[Not Applicable]	Muscle invasive urothelial carcinoma (pT2 or above)	High Grade	2011	[Not Available]	-32041	Alive	TUMOR FREE	35	#N/A	[Not Available]	#N/A	#N/A	#N/A	#N/A	Complete Remission/Response	#N/A	#N/A	0	35	0	35	0
TCGA-ZF-A9RD-01A-11R-A42T-07	428.079	6.2288	1.5907	0	0	2537.69	46.3896	198.177	132.172	0	0	0	0	0.8937	0.8937	0	0	0	1.7873	59.8749	TCGA-ZF-A9RD	BLCA	75	FEMALE	WHITE	Stage IV	[Not Applicable]	Muscle invasive urothelial carcinoma (pT2 or above)	High Grade	2008	[Not Available]	-27496	Dead	#N/A	#N/A	408	[Not Available]	#N/A	#N/A	#N/A	#N/A	[Unknown]	#N/A	#N/A	1	408	#N/A	408	#N/A
TCGA-FD-A3SN-01A-12R-A22U-07	1.9769	110.084	17.7121	1.5771	2.4167	6171	0	1.5549	436.459	0	0	0	0	0.8885	0	0	0	0	0.4442	0	TCGA-FD-A3SN	BLCA	79	MALE	WHITE	Stage III	[Not Applicable]	Muscle invasive urothelial carcinoma (pT2 or above)	High Grade	2011	[Not Available]	-29169	Alive	TUMOR FREE	887	#N/A	[Not Available]	Distant Metastasis	Lung	#N/A	110	Progressive Disease	#N/A	#N/A	0	887	0	887	#N/A
TCGA-BT-A20R-01A-12R-A16R-07	126.172	1.4001	0	0	0	690.429	0	0.8019	31.218	0	0	2.1673	3.9012	0.8669	0.4335	8.6693	19.9393	0	1.3004	211.964	TCGA-BT-A20R	BLCA	79	FEMALE	WHITE	Stage IV	[Not Applicable]	Muscle invasive urothelial carcinoma (pT2 or above)	High Grade	2006	[Not Available]	-28987	Dead	#N/A	#N/A	154	[Not Available]	#N/A	#N/A	#N/A	#N/A	[Not Available]	#N/A	#N/A	1	154	#N/A	154	#N/A
TCGA-XF-AAMZ-01A-11R-A42T-07	4295.64	545.072	16.3868	0	0	4435.46	25.5047	28.8041	637.006	0	0	0	0	0.8482	0.8482	0	11.8745	0	0.8482	1.6964	TCGA-XF-AAMZ	BLCA	81	FEMALE	WHITE	Stage IV	[Not Applicable]	Muscle invasive urothelial carcinoma (pT2 or above)	High Grade	2007	[Not Available]	-29667	Dead	WITH TUMOR	#N/A	1348	[Not Available]	Locoregional (Urothelial tumor event)	Lymph Node Only	#N/A	1344	Partial Remission/Response	#N/A	#N/A	1	1348	1	1348	#N/A
TCGA-CU-A0YN-01A-21R-A10U-07	3.3987	8.2655	0	0	0	202.847	34.2649	66.0228	15.3994	0	0	0	0	0.8413	0	0	0.8413	0	0	96.3253	TCGA-CU-A0YN	BLCA	60	MALE	WHITE	Stage III	[Not Applicable]	Muscle invasive urothelial carcinoma (pT2 or above)	High Grade	2005	[Not Available]	-21927	Dead	#N/A	#N/A	393	[Not Available]	#N/A	#N/A	#N/A	#N/A	[Not Available]	#N/A	#N/A	1	393	#N/A	393	#N/A
TCGA-FD-A6TF-01A-52R-A32O-07	0	8.0183	1.7722	0	0	699.95	0	0	49.7531	0	0.415	0.415	0	0.83	0	0.415	53.5381	0	0.83	58.1033	TCGA-FD-A6TF	BLCA	80	FEMALE	WHITE	Stage IV	[Not Applicable]	Muscle invasive urothelial carcinoma (pT2 or above)	High Grade	2013	[Not Available]	-29317	Dead	TUMOR FREE	#N/A	69	[Not Available]	#N/A	#N/A	#N/A	#N/A	Progressive Disease	#N/A	#N/A	1	69	0	69	#N/A
TCGA-UY-A78K-01A-11R-A33J-07	0	2.9605	0	1.2706	1.3076	131.924	0	0	12.2081	0	0	0.4112	0.4112	0.8224	0	2.0559	0	0.4112	2.4671	25.9046	TCGA-UY-A78K	BLCA	60	MALE	WHITE	Stage IV	[Not Applicable]	Muscle invasive urothelial carcinoma (pT2 or above)	High Grade	#N/A	[Not Available]	-22020	Dead	#N/A	#N/A	536	[Not Available]	#N/A	#N/A	#N/A	#N/A	Complete Remission/Response	#N/A	#N/A	1	536	#N/A	536	#N/A
TCGA-FD-A3B7-01A-31R-A20F-07	59.8658	31.4562	0	0	0	79.8658	0	13.4096	13.1137	0	0	0	0	0.7893	0	0	1.9732	1.1839	5.5249	3.5517	TCGA-FD-A3B7	BLCA	66	MALE	BLACK OR AFRICAN AMERICAN	Stage III	[Not Applicable]	Muscle invasive urothelial carcinoma (pT2 or above)	High Grade	2011	[Not Available]	-24245	Dead	WITH TUMOR	#N/A	122	[Not Available]	Distant Metastasis	Lymph Node Only	#N/A	110	Progressive Disease	#N/A	#N/A	1	122	1	122	#N/A
TCGA-FD-A43X-01A-11R-A23W-07	2627.98	395.622	0	2.7933	0	4996.27	19.0075	57.3362	650.698	1.1769	1.9616	0	1.5692	0.7846	17.2617	0	4.7077	0	0.3923	0.3923	TCGA-FD-A43X	BLCA	84	MALE	WHITE	Stage II	[Not Applicable]	Muscle invasive urothelial carcinoma (pT2 or above)	High Grade	2012	[Not Available]	-30764	Alive	TUMOR FREE	110	#N/A	[Not Available]	#N/A	#N/A	#N/A	#N/A	Complete Remission/Response	#N/A	#N/A	0	110	0	110	0
TCGA-FD-A3B8-01A-31R-A20F-07	2166.62	11.6646	3.494	0.6818	0.6973	731.481	0	93.59	31.569	1.5409	0	0	0	0.7704	0	1.5409	0	0.3852	68.5697	80.1264	TCGA-FD-A3B8	BLCA	56	MALE	WHITE	Stage II	[Not Applicable]	Muscle invasive urothelial carcinoma (pT2 or above)	High Grade	2011	[Not Available]	-20555	Alive	TUMOR FREE	384	#N/A	[Not Available]	#N/A	#N/A	#N/A	#N/A	Complete Remission/Response	#N/A	#N/A	0	384	0	384	0
TCGA-XF-AAMQ-01A-11R-A42T-07	4537.84	75.0394	1.4021	0	0	94.5632	0.3974	55.0095	366.656	2.7154	0.9874	8.8868	0.4937	0.7406	4.4434	0.2469	476.68	0	7.4057	1.4811	TCGA-XF-AAMQ	BLCA	59	FEMALE	WHITE	Stage II	[Not Applicable]	Muscle invasive urothelial carcinoma (pT2 or above)	High Grade	2006	[Not Available]	-21660	Alive	TUMOR FREE	2177	#N/A	[Not Available]	#N/A	#N/A	#N/A	#N/A	Complete Remission/Response	#N/A	#N/A	0	2177	0	2177	0
TCGA-DK-A3IS-01A-21R-A21D-07	6960.99	60.2667	9.651	1.1652	0	3083.33	24.4484	53.5779	791.541	3.7367	0	0	6.4544	0.6794	6.7941	0.3397	0	0	4.7558	9.8514	TCGA-DK-A3IS	BLCA	68	MALE	WHITE	Stage II	[Not Applicable]	Muscle invasive urothelial carcinoma (pT2 or above)	High Grade	2008	[Not Available]	-25098	Alive	TUMOR FREE	1529	#N/A	[Not Available]	#N/A	#N/A	#N/A	#N/A	Complete Remission/Response	#N/A	#N/A	0	1529	0	1529	0
TCGA-4Z-AA86-01A-11R-A39I-07	0	6.0362	0	0	0	169.819	15.2159	0.5658	9.5681	0	0	0	0	0.6696	0	0	0	0	6.6957	5.0218	TCGA-4Z-AA86	BLCA	66	MALE	BLACK OR AFRICAN AMERICAN	Stage IV	[Not Applicable]	Muscle invasive urothelial carcinoma (pT2 or above)	High Grade	2009	[Not Available]	-24465	Dead	WITH TUMOR	#N/A	311	[Not Available]	Locoregional (Urothelial tumor event)	Other, specify	Pelvis	136	Complete Remission/Response	#N/A	#N/A	1	311	1	311	#N/A
TCGA-SY-A9G0-01A-12R-A38B-07	6.0238	491.757	7.893	3.1176	3.9498	8595.98	0	5.6605	635.938	0	9.9075	4.6235	0	0.6605	0	23.7781	114.927	0	0.6605	7.2655	TCGA-SY-A9G0	BLCA	82	MALE	WHITE	Stage IV	[Not Applicable]	Muscle invasive urothelial carcinoma (pT2 or above)	High Grade	2011	[Not Available]	-30205	Dead	TUMOR FREE	#N/A	1008	[Not Available]	#N/A	#N/A	#N/A	#N/A	Complete Remission/Response	#N/A	#N/A	1	1008	0	1008	#N/A
TCGA-E7-A678-01A-11R-A30C-07	64.7423	113.77	4.5597	4.4031	0	5707.43	4.6184	872.133	872.179	1.9569	0	0	1.9569	0.6523	36.5297	0	2.6093	0	15.6556	0	TCGA-E7-A678	BLCA	55	MALE	ASIAN	Stage III	[Not Applicable]	Muscle invasive urothelial carcinoma (pT2 or above)	Low Grade	2012	[Not Available]	-20169	Alive	TUMOR FREE	798	#N/A	[Not Available]	#N/A	#N/A	#N/A	#N/A	Complete Remission/Response	#N/A	#N/A	0	798	0	798	0
TCGA-DK-AA71-01A-31R-A39I-07	1.9752	67.236	0	0	0	2346.88	0	0	228	0	0	0	0	0.6211	4.3478	0	0	0	7.4534	54.6584	TCGA-DK-AA71	BLCA	71	MALE	WHITE	Stage II	[Not Applicable]	Muscle invasive urothelial carcinoma (pT2 or above)	High Grade	2013	[Not Available]	-25950	Alive	WITH TUMOR	415	#N/A	[Not Available]	#N/A	#N/A	#N/A	#N/A	Stable Disease	#N/A	#N/A	0	415	0	415	#N/A
TCGA-UY-A8OB-01A-12R-A42T-07	739.674	0	1.0479	0	0	2121.98	53.7157	5.7045	94.4722	0.6201	0	0	0	0.6201	0	0	0.6201	0	6.8206	0	TCGA-UY-A8OB	BLCA	63	MALE	WHITE	Stage IV	[Not Applicable]	Muscle invasive urothelial carcinoma (pT2 or above)	High Grade	#N/A	[Not Available]	-23360	Alive	TUMOR FREE	2109	#N/A	[Not Available]	#N/A	#N/A	#N/A	#N/A	Complete Remission/Response	#N/A	#N/A	0	2109	0	2109	#N/A
TCGA-GD-A3OS-01A-12R-A220-07	6.7025	1.3579	1.7293	0	0.8646	62.2458	18.6943	15.7551	3.4847	0.2901	0	0	0	0.5803	0	0	0	0.2901	277.963	108.516	TCGA-GD-A3OS	BLCA	54	FEMALE	WHITE	Stage II	[Not Applicable]	Muscle invasive urothelial carcinoma (pT2 or above)	High Grade	2011	[Not Available]	-19776	Alive	WITH TUMOR	638	#N/A	[Not Available]	Locoregional (Urothelial tumor event)	Bladder	#N/A	223	Progressive Disease	#N/A	#N/A	0	638	0	638	#N/A
TCGA-UY-A8OC-01A-11R-A36F-07	474.844	0	0	0	0	663.002	0	1.1768	90.0853	0	0.5685	0	0	0.5685	0	0	1.137	0	0	116.543	TCGA-UY-A8OC	BLCA	90	MALE	WHITE	Stage IV	[Not Applicable]	Muscle invasive urothelial carcinoma (pT2 or above)	High Grade	#N/A	[Not Available]	-32918	Dead	WITH TUMOR	#N/A	92	[Not Available]	Distant Metastasis	Lymph Node Only	#N/A	32	Partial Remission/Response	#N/A	#N/A	1	92	1	92	#N/A
TCGA-PQ-A6FN-01A-11R-A31N-07	131.628	14.0011	0	0	0	451.377	0	0	61.08	0	0	0	0	0.5596	0	0	0	0	0.5596	2.798	TCGA-PQ-A6FN	BLCA	78	FEMALE	WHITE	Stage III	[Not Applicable]	Muscle invasive urothelial carcinoma (pT2 or above)	High Grade	2011	[Not Available]	-28546	Alive	#N/A	507	#N/A	[Not Available]	#N/A	#N/A	#N/A	#N/A	[Unknown]	#N/A	#N/A	0	507	0	507	#N/A
TCGA-4Z-AA81-01A-11R-A39I-07	1094.84	6.876	0	0	0	1236.48	21.0909	563.824	135.84	0	0	0	0	0.551	0	0	0.551	0	0	1.1019	TCGA-4Z-AA81	BLCA	80	MALE	WHITE	Stage II	[Not Applicable]	Muscle invasive urothelial carcinoma (pT2 or above)	High Grade	2010	[Not Available]	-29457	Dead	TUMOR FREE	#N/A	1270	[Not Available]	#N/A	#N/A	#N/A	#N/A	Complete Remission/Response	#N/A	#N/A	1	1270	0	1270	0
TCGA-DK-AA6Q-01A-11R-A39I-07	66.6888	54.435	21.0356	5.8985	1.0014	11043.3	39.2704	4166.99	1201.47	2.7512	0	0	0	0.5502	0	0	0	0	0.5502	1.1005	TCGA-DK-AA6Q	BLCA	61	FEMALE	WHITE	Stage IV	[Not Applicable]	Muscle invasive urothelial carcinoma (pT2 or above)	High Grade	2012	[Not Available]	-22314	Dead	WITH TUMOR	#N/A	413	[Not Available]	Distant Metastasis	Liver	#N/A	285	Progressive Disease	#N/A	#N/A	1	413	1	413	#N/A
TCGA-K4-A4AC-01A-21R-A26T-07	9.4557	0	0	0	0	12.0939	7.5196	0	0	0	0	0	0	0.5485	0	0	2.7424	0	0.5485	24.1329	TCGA-K4-A4AC	BLCA	83	MALE	WHITE	Stage II	[Not Applicable]	Muscle invasive urothelial carcinoma (pT2 or above)	High Grade	2012	[Not Available]	-30655	Dead	WITH TUMOR	#N/A	278	[Not Available]	Distant Metastasis	Other, specify	psoas	170	Partial Remission/Response	#N/A	#N/A	1	278	1	278	#N/A
TCGA-XF-A9ST-01A-11R-A42T-07	0	1.7125	0	0	0	30.6214	0	3.0493	0.0429	0	0	0	0	0.5368	0	0	0	10.2	187.894	13.421	TCGA-XF-A9ST	BLCA	68	MALE	WHITE	Stage III	[Not Applicable]	Muscle invasive urothelial carcinoma (pT2 or above)	High Grade	2005	[Not Available]	-25080	Dead	#N/A	#N/A	128	[Not Available]	#N/A	#N/A	#N/A	#N/A	[Unknown]	#N/A	#N/A	1	128	#N/A	128	#N/A
TCGA-FD-A62N-01A-11R-A30C-07	0	5.3568	2.0234	0.9744	0	404.164	0	0	51.2673	0	0	0	0	0.5325	0	0	0	0	19.7018	28.2215	TCGA-FD-A62N	BLCA	69	MALE	ASIAN	Stage III	[Not Applicable]	Muscle invasive urothelial carcinoma (pT2 or above)	High Grade	2012	[Not Available]	-25297	Alive	TUMOR FREE	82	#N/A	[Not Available]	#N/A	#N/A	#N/A	#N/A	Complete Remission/Response	#N/A	#N/A	0	82	0	82	0
TCGA-XF-AAMH-01A-11R-A42T-07	7.5418	10.0523	0	0	0	383.76	0	36.4017	0	0	0	0	0	0.523	0	0.523	5.2301	1.046	2178.87	26.6736	TCGA-XF-AAMH	BLCA	80	MALE	WHITE	Stage IV	[Not Applicable]	Muscle invasive urothelial carcinoma (pT2 or above)	High Grade	2005	[Not Available]	-29547	Dead	WITH TUMOR	#N/A	344	[Not Available]	Distant Metastasis	Other, specify	lumbar spine and right hemipelvis	313	Progressive Disease	#N/A	#N/A	1	344	1	344	#N/A
TCGA-DK-AA6W-01A-12R-A39I-07	0	0.5103	0	0	0	8.9032	0	0	0	2.9727	0	0	0	0.4954	0	0	0	0	639.127	607.914	TCGA-DK-AA6W	BLCA	78	MALE	WHITE	Stage II	[Not Applicable]	Muscle invasive urothelial carcinoma (pT2 or above)	High Grade	2013	[Not Available]	-28853	Dead	WITH TUMOR	#N/A	415	[Not Available]	Distant Metastasis	Lung	#N/A	379	Stable Disease	#N/A	#N/A	1	415	1	415	#N/A
TCGA-4Z-AA82-01A-11R-A39I-07	9.4057	125.029	66.8811	6.9941	4.4597	4825.13	1.7976	81.8713	885.309	0	0	0	0	0.4912	0	0	0.9823	0	3.4381	123.772	TCGA-4Z-AA82	BLCA	59	MALE	BLACK OR AFRICAN AMERICAN	Stage IV	[Not Applicable]	Muscle invasive urothelial carcinoma (pT2 or above)	High Grade	2010	[Not Available]	-21893	Dead	WITH TUMOR	#N/A	1556	[Not Available]	Distant Metastasis	Bone	#N/A	1150	Complete Remission/Response	#N/A	#N/A	1	1556	1	1556	#N/A
TCGA-ZF-A9RN-01A-11R-A42T-07	0	0	1.4498	0	0	16.409	0	2.7844	0	1.9203	0	0	0	0.4801	0	0	21.6035	0.4801	3.8406	831.973	TCGA-ZF-A9RN	BLCA	67	FEMALE	WHITE	Stage III	[Not Applicable]	Muscle invasive urothelial carcinoma (pT2 or above)	High Grade	2010	[Not Available]	-24795	Dead	WITH TUMOR	#N/A	615	[Not Available]	Distant Metastasis	Lung	#N/A	516	Partial Remission/Response	#N/A	#N/A	1	615	1	615	#N/A
TCGA-XF-A9T8-01A-11R-A39I-07	269.991	2.2786	0	0	0	148.305	0.8029	12.8549	24.2759	0	0	0	0	0.4641	0.4641	0	4.1767	0	0.9282	91.8873	TCGA-XF-A9T8	BLCA	64	MALE	WHITE	Stage III	[Not Applicable]	Muscle invasive urothelial carcinoma (pT2 or above)	High Grade	2008	[Not Available]	-23403	Dead	#N/A	#N/A	418	[Not Available]	#N/A	#N/A	#N/A	#N/A	[Unknown]	#N/A	#N/A	1	418	#N/A	418	#N/A
TCGA-GU-A766-01A-11R-A32O-07	0	1.4793	0	0	0	10.3376	0	0	0	0	0	1.313	0	0.4377	0	0	221.457	0.4377	82.2804	46.8298	TCGA-GU-A766	BLCA	62	MALE	WHITE	Stage II	[Not Applicable]	Muscle invasive urothelial carcinoma (pT2 or above)	High Grade	2013	[Not Available]	-22774	Alive	WITH TUMOR	480	#N/A	[Not Available]	#N/A	#N/A	#N/A	#N/A	Progressive Disease	#N/A	#N/A	0	480	0	480	#N/A
TCGA-K4-A5RI-01A-11R-A28M-07	8140.18	17.8817	28.434	6.2836	1.2934	7614.36	179.043	2575.95	2017.81	2.5612	0	0	0	0.4269	2.1344	0.4269	0	0	3.8419	0.4269	TCGA-K4-A5RI	BLCA	67	FEMALE	WHITE	Stage III	[Not Applicable]	Muscle invasive urothelial carcinoma (pT2 or above)	High Grade	2012	[Not Available]	-24614	Dead	WITH TUMOR	#N/A	356	[Not Available]	Locoregional (Urothelial tumor event)	Other, specify	ileum	236	Progressive Disease	#N/A	#N/A	1	356	1	356	#N/A
TCGA-XF-AAMT-01A-11R-A42T-07	10.7776	4.8844	3.7074	4.8129	0	667.129	4.5691	350.017	92.396	2.5221	0.4203	0	0.4203	0.4203	0	0	1.6814	2.1017	36.57	84.4893	TCGA-XF-AAMT	BLCA	75	FEMALE	WHITE	Stage IV	[Not Applicable]	Muscle invasive urothelial carcinoma (pT2 or above)	High Grade	2006	[Not Available]	-27397	Dead	WITH TUMOR	#N/A	90	[Not Available]	#N/A	#N/A	#N/A	#N/A	Partial Remission/Response	#N/A	#N/A	1	90	1	90	#N/A
TCGA-2F-A9KP-01A-11R-A38B-07	37.6737	107.961	7.7653	2.2139	2.268	3295.78	1.1444	0	164.428	10.8198	0	2.0807	0	0.4161	1.6646	2.0807	64.9189	0	2.913	2.0807	TCGA-2F-A9KP	BLCA	66	MALE	WHITE	Stage IV	[Not Applicable]	Muscle invasive urothelial carcinoma (pT2 or above)	High Grade	2011	[Not Available]	-24428	Dead	WITH TUMOR	#N/A	364	[Not Available]	Distant Metastasis	Liver	#N/A	343	Progressive Disease	#N/A	#N/A	1	364	1	364	#N/A
TCGA-FD-A3SP-01A-31R-A22U-07	328.6	1.2474	0	0	0	102.058	0	2.4084	23.8987	0	0	0	0	0.4117	0	1.2351	14.8209	0	9.4689	30.0535	TCGA-FD-A3SP	BLCA	60	MALE	WHITE	Stage III	[Not Applicable]	Muscle invasive urothelial carcinoma (pT2 or above)	High Grade	2012	[Not Available]	-22005	Alive	TUMOR FREE	783	#N/A	[Not Available]	#N/A	#N/A	#N/A	#N/A	Complete Remission/Response	#N/A	#N/A	0	783	0	783	0
TCGA-FD-A5C0-01A-11R-A28M-07	71.0932	26.2727	3.7676	0	0	993.288	40.6938	2615.57	179.927	0	0	0	0.4034	0.4034	1.2102	0.8068	0.4034	0	97.2166	0.8068	TCGA-FD-A5C0	BLCA	61	MALE	WHITE	Stage IV	[Not Applicable]	Muscle invasive urothelial carcinoma (pT2 or above)	High Grade	2012	[Not Available]	-22500	Dead	WITH TUMOR	#N/A	550	[Not Available]	New Primary Tumor	Lung	#N/A	27	Complete Remission/Response	#N/A	#N/A	1	550	1	550	#N/A
TCGA-DK-A3IT-01A-31R-A20F-07	1209.35	0	2.2752	3.7066	0	631.329	6.1041	13.8841	177.52	0	0	0	0	0.3943	0.3943	0	0	0	0.7886	2.3659	TCGA-DK-A3IT	BLCA	62	MALE	WHITE	Stage III	[Not Applicable]	Muscle invasive urothelial carcinoma (pT2 or above)	High Grade	2011	[Not Available]	-22786	Alive	TUMOR FREE	648	#N/A	[Not Available]	#N/A	#N/A	#N/A	#N/A	Complete Remission/Response	#N/A	#N/A	0	648	0	648	0
TCGA-E7-A7DV-01A-11R-A33J-07	2084.38	0	4.3891	0	0	2905.16	359.063	24.685	466.558	0	0.7838	0	0	0.3919	0	0	2.3513	0.3919	4.3108	0.7838	TCGA-E7-A7DV	BLCA	44	MALE	WHITE	Stage IV	[Not Applicable]	Muscle invasive urothelial carcinoma (pT2 or above)	High Grade	2013	[Not Available]	-16145	Alive	WITH TUMOR	37	#N/A	[Not Available]	#N/A	#N/A	#N/A	#N/A	Stable Disease	#N/A	#N/A	0	37	0	37	#N/A
TCGA-CF-A47X-01A-31R-A23W-07	7072.28	456.704	3.517	5.6817	1.1711	1819.4	85.5112	369.442	741.759	1.4503	0	0	0	0.3626	0	0	0	0	0	0.7252	TCGA-CF-A47X	BLCA	60	MALE	ASIAN	Stage II	[Not Applicable]	Muscle invasive urothelial carcinoma (pT2 or above)	Low Grade	2012	[Not Available]	-22200	Alive	TUMOR FREE	384	#N/A	[Not Available]	#N/A	#N/A	#N/A	#N/A	Complete Remission/Response	#N/A	#N/A	0	384	0	384	0
TCGA-BT-A3PH-01A-11R-A220-07	45.6115	3.26	2.2327	0.5521	0	416.66	1.0832	28.4626	22.051	7.6869	0	0.3494	6.9776	0.3494	6.2893	1.747	0.6988	0	0.3494	0	TCGA-BT-A3PH	BLCA	76	MALE	WHITE	Stage IV	[Not Applicable]	Muscle invasive urothelial carcinoma (pT2 or above)	High Grade	2010	[Not Available]	-28030	Dead	WITH TUMOR	#N/A	142	[Not Available]	#N/A	#N/A	#N/A	#N/A	Progressive Disease	#N/A	#N/A	1	142	1	142	#N/A
TCGA-DK-A6B5-01A-11R-A31N-07	2994.69	19.0347	4.1721	3.4993	0.595	3852.75	79.8918	52.4656	286.961	0.3381	0.3381	0	1.3524	0.3381	3.3809	0	9.1286	0	29.7523	1.3524	TCGA-DK-A6B5	BLCA	45	MALE	WHITE	Stage IV	[Not Applicable]	Muscle invasive urothelial carcinoma (pT2 or above)	High Grade	2010	[Not Available]	-16453	Alive	TUMOR FREE	1542	#N/A	[Not Available]	#N/A	#N/A	#N/A	#N/A	Complete Remission/Response	#N/A	#N/A	0	1542	0	1542	#N/A
TCGA-DK-A1A6-01A-11R-A13Y-07	1.5236	55.7917	7.7661	2.9291	0.5966	4130.49	0.6	2.3123	362.922	0.6741	0	0	0	0.3371	0.3371	0.3371	0	0	0.6741	0.3371	TCGA-DK-A1A6	BLCA	53	MALE	WHITE	Stage IV	[Not Applicable]	Muscle invasive urothelial carcinoma (pT2 or above)	High Grade	2008	[Not Available]	-19554	Alive	TUMOR FREE	2020	#N/A	[Not Available]	#N/A	#N/A	#N/A	#N/A	Complete Remission/Response	#N/A	#N/A	0	2020	0	2020	#N/A
TCGA-FD-A6TH-01A-11R-A32O-07	0	0	0	0	0	20.7174	0.7077	0	0	0	0	0	0	0.3246	0	0.6492	0.9739	0	0.3246	0.9739	TCGA-FD-A6TH	BLCA	63	MALE	WHITE	Stage IV	[Not Applicable]	Muscle invasive urothelial carcinoma (pT2 or above)	High Grade	2013	[Not Available]	-23236	Dead	WITH TUMOR	#N/A	131	[Not Available]	Distant Metastasis	Lung	#N/A	126	Complete Remission/Response	#N/A	#N/A	1	131	1	131	#N/A
TCGA-E5-A2PC-01A-11R-A206-07	15908.1	129.595	18.6307	13.0276	2.12	22978.2	110.298	121.498	2846.07	28.2663	0	0	0	0.3141	1.5704	0	0.9422	0	1.2563	35.4899	TCGA-E5-A2PC	BLCA	61	FEMALE	WHITE	Stage IV	[Not Applicable]	Muscle invasive urothelial carcinoma (pT2 or above)	High Grade	2008	[Not Available]	-22308	Alive	TUMOR FREE	1326	#N/A	[Not Available]	#N/A	#N/A	#N/A	#N/A	Complete Remission/Response	#N/A	#N/A	0	1326	0	1326	#N/A
TCGA-BT-A2LA-01A-11R-A18C-07	0	0	0	0	0	2.6447	0	0	0	3.2324	0	0.2939	2.057	0.2939	0	4.114	0.2939	22.6271	89.0391	418.748	TCGA-BT-A2LA	BLCA	54	MALE	WHITE	Stage III	[Not Applicable]	Muscle invasive urothelial carcinoma (pT2 or above)	High Grade	2010	[Not Available]	-20032	Alive	TUMOR FREE	522	#N/A	[Not Available]	#N/A	#N/A	#N/A	#N/A	Complete Remission/Response	#N/A	#N/A	0	522	0	522	0
TCGA-BT-A3PK-01A-21R-A220-07	0	1.9449	0	0	0	8.5876	0	0	1.3018	0.2573	0	0	0	0.2573	0	0	1.2863	0	5.9172	44.5073	TCGA-BT-A3PK	BLCA	80	MALE	WHITE	Stage II	[Not Applicable]	Muscle invasive urothelial carcinoma (pT2 or above)	High Grade	2011	[Not Available]	-29314	Dead	WITH TUMOR	#N/A	303	[Not Available]	#N/A	#N/A	#N/A	#N/A	Stable Disease	#N/A	#N/A	1	303	1	303	#N/A
TCGA-XF-AAN3-01A-11R-A42T-07	3387.34	60.5967	24.4667	11.931	6.4195	6856.7	4.2248	2964.5	1126.51	0	0	0	1.2728	0.1983	2.9738	0.1983	0	0	5.3529	1.7843	TCGA-XF-AAN3	BLCA	76	MALE	WHITE	Stage IV	[Not Applicable]	Muscle invasive urothelial carcinoma (pT2 or above)	High Grade	2007	[Not Available]	-27909	Alive	TUMOR FREE	2625	#N/A	[Not Available]	#N/A	#N/A	#N/A	#N/A	Complete Remission/Response	#N/A	#N/A	0	2625	0	2625	#N/A
TCGA-2F-A9KW-01A-11R-A38B-07	13.2998	30.8462	1.8012	1.7489	0	485.998	0	0	93.0673	0.5236	0	1.5708	4.1889	0	0	0	207.875	0	2.6181	0	TCGA-2F-A9KW	BLCA	67	FEMALE	WHITE	Stage III	[Not Applicable]	Muscle invasive urothelial carcinoma (pT2 or above)	High Grade	2013	[Not Available]	-24703	Dead	WITH TUMOR	#N/A	254	[Not Available]	Distant Metastasis	Bone	#N/A	85	Stable Disease	#N/A	#N/A	1	254	1	254	#N/A
TCGA-4Z-AA84-01A-11R-A39I-07	18.0023	4.8235	0.9637	0	0	163.875	0	14.0122	0.948	0.5209	0	0	0	0	0	0	2.6045	0	0.5209	101.576	TCGA-4Z-AA84	BLCA	61	MALE	WHITE	Stage IV	[Not Applicable]	Muscle invasive urothelial carcinoma (pT2 or above)	High Grade	2008	[Not Available]	-22397	Alive	WITH TUMOR	460	#N/A	[Not Available]	#N/A	#N/A	#N/A	#N/A	Progressive Disease	#N/A	#N/A	0	460	0	460	#N/A
TCGA-BL-A13I-01A-11R-A13Y-07	1387.56	7.0065	0	0	0	490.214	1.4401	589.656	350.983	0	0	0	0	0	0	0	0	0	1.2136	0.8091	TCGA-BL-A13I	BLCA	57	FEMALE	WHITE	Stage III	[Not Applicable]	Muscle invasive urothelial carcinoma (pT2 or above)	High Grade	2010	[Not Available]	-20885	Dead	WITH TUMOR	#N/A	223	[Not Available]	Metastatic	#N/A	#N/A	216	Progressive Disease	#N/A	#N/A	1	223	1	223	#N/A
TCGA-BT-A0S7-01A-11R-A10U-07	220.716	0	0	0	0	101.456	0	1.4558	1.0671	0.7622	0	0	0	0	0	0	0	0	166.159	51.0671	TCGA-BT-A0S7	BLCA	75	MALE	WHITE	Stage III	[Not Applicable]	Muscle invasive urothelial carcinoma (pT2 or above)	High Grade	2007	[Not Available]	-27533	Dead	WITH TUMOR	#N/A	200	[Not Available]	#N/A	#N/A	#N/A	#N/A	Progressive Disease	#N/A	#N/A	1	200	1	200	#N/A
TCGA-BT-A20J-01A-11R-A14Y-07	6.7338	0	0	0	0	53.0952	0	0	0	14.652	0	0	0	0	0	1.221	0	2.442	14.652	249.084	TCGA-BT-A20J	BLCA	75	MALE	WHITE	Stage II	[Not Applicable]	Muscle invasive urothelial carcinoma (pT2 or above)	High Grade	1999	[Not Available]	-27646	Dead	WITH TUMOR	#N/A	579	[Not Available]	Distant Metastasis	Other, specify	Adrenal	254	Progressive Disease	#N/A	#N/A	1	579	1	579	#N/A
TCGA-BT-A20T-01A-11R-A14Y-07	7897.26	36.4741	2.8445	0	5.6971	4640.59	190.639	37.5878	511.711	0	0	0	0.8013	0	8.814	0	1.6026	0	74.5186	12.8204	TCGA-BT-A20T	BLCA	63	MALE	WHITE	Stage IV	[Not Applicable]	Muscle invasive urothelial carcinoma (pT2 or above)	High Grade	2007	[Not Available]	-23220	Dead	WITH TUMOR	#N/A	453	[Not Available]	Distant Metastasis	Liver	#N/A	314	Progressive Disease	#N/A	#N/A	1	453	1	453	#N/A
TCGA-BT-A20X-01A-11R-A16R-07	11.1527	0	0	0	0	14.1425	0	3.5793	6.414	7.7557	0	0	0	0	0	0	0	0	7.3679	628.987	TCGA-BT-A20X	BLCA	56	MALE	WHITE	Stage IV	[Not Applicable]	Muscle invasive urothelial carcinoma (pT2 or above)	High Grade	2009	[Not Available]	-20519	Dead	WITH TUMOR	#N/A	251	[Not Available]	#N/A	#N/A	#N/A	#N/A	Progressive Disease	#N/A	#N/A	1	251	1	251	#N/A
TCGA-BT-A2LD-01A-12R-A20F-07	2.5723	26.2961	13.7537	8.2802	6.346	6524.98	164.008	0	498.026	0	0	0	0	0	0	0	2.4925	0	1.4955	1.4955	TCGA-BT-A2LD	BLCA	78	FEMALE	WHITE	Stage IV	[Not Applicable]	Muscle invasive urothelial carcinoma (pT2 or above)	High Grade	2011	[Not Available]	-28673	Dead	WITH TUMOR	#N/A	623	[Not Available]	Distant Metastasis	Other, specify	brain and spinal cord	555	Progressive Disease	#N/A	#N/A	1	623	1	623	#N/A
TCGA-BT-A42E-01A-11R-A23W-07	0	0	0	0	0	11.9947	0	0	0	0	0	0.8885	0	0	0	0	133.274	0	2.6655	0.4442	TCGA-BT-A42E	BLCA	74	MALE	WHITE	Stage III	[Not Applicable]	Muscle invasive urothelial carcinoma (pT2 or above)	High Grade	2012	[Not Available]	-27045	Alive	TUMOR FREE	1108	#N/A	[Not Available]	#N/A	#N/A	#N/A	#N/A	Complete Remission/Response	#N/A	#N/A	0	1108	0	1108	0
TCGA-C4-A0F0-01A-12R-A10U-07	0	0	0	0	0	0.6636	0	0	0	0	0	0	0	0	0	0	0	0	0.6636	0.6636	TCGA-C4-A0F0	BLCA	60	MALE	[Not Available]	Stage II	[Not Applicable]	Muscle invasive urothelial carcinoma (pT2 or above)	High Grade	2007	[Not Available]	-22068	Alive	TUMOR FREE	59	#N/A	[Not Available]	#N/A	#N/A	#N/A	#N/A	[Not Available]	#N/A	#N/A	0	59	0	59	#N/A
TCGA-C4-A0F1-01A-11R-A034-07	1.0398	0	0	0.8468	0	4.0038	0	0	0	25.7269	0	0	1.072	0	0	0	0	38.5904	6.4317	353.209	TCGA-C4-A0F1	BLCA	71	MALE	[Not Available]	Stage III	[Not Applicable]	Muscle invasive urothelial carcinoma (pT2 or above)	High Grade	2006	[Not Available]	-26178	Alive	TUMOR FREE	89	#N/A	[Not Available]	#N/A	#N/A	#N/A	#N/A	[Not Available]	#N/A	#N/A	0	89	0	89	#N/A
TCGA-CF-A3MI-01A-11R-A20F-07	727.231	444.909	5.3737	2.5954	10.7544	7252.28	0	91.1271	520.063	0	0	0	0.7034	0	5.6269	0	4.9235	0	0	0	TCGA-CF-A3MI	BLCA	62	MALE	ASIAN	Stage II	[Not Applicable]	Muscle invasive urothelial carcinoma (pT2 or above)	Low Grade	2011	[Not Available]	-22716	Alive	TUMOR FREE	370	#N/A	[Not Available]	#N/A	#N/A	#N/A	#N/A	Complete Remission/Response	#N/A	#N/A	0	370	0	370	0
TCGA-CF-A47T-01A-11R-A23W-07	3591.05	164.06	2.3142	0	2.3142	11061.6	60.9909	1665.52	1289.59	16.3142	0	0	0	0	15.71	0	1.2085	0	0	36.858	TCGA-CF-A47T	BLCA	58	FEMALE	ASIAN	Stage II	[Not Applicable]	Muscle invasive urothelial carcinoma (pT2 or above)	Low Grade	2011	[Not Available]	-21347	Dead	WITH TUMOR	#N/A	385	[Not Available]	Distant Metastasis	Bone	#N/A	139	Complete Remission/Response	#N/A	#N/A	1	385	1	385	1
TCGA-CF-A5UA-01A-11R-A28M-07	3858.84	31.6054	0	0	0	17692.3	105.994	24.508	1365.76	2.4851	0	0	0	0	19.8807	0.994	0	0	6.4612	5.9642	TCGA-CF-A5UA	BLCA	67	MALE	ASIAN	Stage II	[Not Applicable]	Muscle invasive urothelial carcinoma (pT2 or above)	Low Grade	2012	[Not Available]	-24625	Alive	TUMOR FREE	365	#N/A	[Not Available]	#N/A	#N/A	#N/A	#N/A	Complete Remission/Response	#N/A	#N/A	0	365	0	365	0
TCGA-CU-A3KJ-01A-11R-A21D-07	8.2614	0	0	0	0	2.982	0.5526	0	2.7912	0	0	0	0	0	0.2805	0	0	0.8416	26.3693	618.276	TCGA-CU-A3KJ	BLCA	75	MALE	WHITE	Stage III	[Not Applicable]	Muscle invasive urothelial carcinoma (pT2 or above)	High Grade	2011	[Not Available]	-27692	Alive	WITH TUMOR	562	#N/A	[Not Available]	Distant Metastasis	Lung	#N/A	166	Progressive Disease	#N/A	#N/A	0	562	0	562	#N/A
TCGA-DK-A1A3-01A-11R-A13Y-07	3386.42	17.156	1.639	1.5851	0	1268.48	3.3158	3896.9	499.571	0	0	0	0	0	0	1.6175	0	0	0	1.6175	TCGA-DK-A1A3	BLCA	60	MALE	WHITE	Stage IV	[Not Applicable]	Muscle invasive urothelial carcinoma (pT2 or above)	High Grade	2010	[Not Available]	-22235	Dead	WITH TUMOR	#N/A	665	[Not Available]	#N/A	#N/A	#N/A	#N/A	[Not Available]	#N/A	#N/A	1	665	1	665	#N/A
TCGA-DK-A2I2-01A-11R-A180-07	0	1.4149	0	0	0	5.8644	0	0	0	0	0	0	0	0	0	0	0.455	0	7.2793	214.741	TCGA-DK-A2I2	BLCA	63	FEMALE	WHITE	Stage IV	[Not Applicable]	Muscle invasive urothelial carcinoma (pT2 or above)	High Grade	2010	[Not Available]	-23116	Dead	WITH TUMOR	#N/A	237	[Not Available]	Distant Metastasis	Liver	#N/A	163	Complete Remission/Response	#N/A	#N/A	1	237	1	237	#N/A
TCGA-DK-A2I4-01A-11R-A21D-07	7926.57	12.6168	0	0	0	424.994	124.486	69.4984	520.613	0	0	0	0	0	0	0	0	0	9.6431	40.7497	TCGA-DK-A2I4	BLCA	79	MALE	WHITE	Stage III	[Not Applicable]	Muscle invasive urothelial carcinoma (pT2 or above)	High Grade	2001	[Not Available]	-29037	Alive	TUMOR FREE	4343	#N/A	[Not Available]	#N/A	#N/A	#N/A	#N/A	Complete Remission/Response	#N/A	#N/A	0	4343	0	4343	0
TCGA-DK-A3IL-01A-11R-A20F-07	0	15.0719	1.8195	0.8924	2.7268	2561.85	0	0	198.498	2.4789	0	0	1.4874	0	19.3356	0	1.4874	0	0	3.4705	TCGA-DK-A3IL	BLCA	79	FEMALE	WHITE	Stage IV	[Not Applicable]	Muscle invasive urothelial carcinoma (pT2 or above)	High Grade	2011	[Not Available]	-29047	Dead	TUMOR FREE	#N/A	413	[Not Available]	#N/A	#N/A	#N/A	#N/A	Complete Remission/Response	#N/A	#N/A	1	413	0	413	#N/A
TCGA-DK-A3IM-01A-11R-A20F-07	3.8103	0	0	0	0	21.6672	0	1.0647	0.8456	0	0	0	0	0	0	0	0.3423	0	97.227	189.661	TCGA-DK-A3IM	BLCA	76	MALE	WHITE	Stage III	[Not Applicable]	Muscle invasive urothelial carcinoma (pT2 or above)	High Grade	2011	[Not Available]	-28106	Dead	WITH TUMOR	#N/A	248	[Not Available]	Locoregional (Urothelial tumor event)	Lymph Node Only	#N/A	201	Complete Remission/Response	#N/A	#N/A	1	248	1	248	1
TCGA-DK-AA6L-01A-11R-A39I-07	3639.11	27.9937	5.8103	7.4987	0	2196.08	23.5435	1295.3	849.995	0	0	0	0.5211	0	2.0844	0	89.63	0	1.0422	6.7744	TCGA-DK-AA6L	BLCA	48	MALE	WHITE	Stage IV	[Not Applicable]	Muscle invasive urothelial carcinoma (pT2 or above)	High Grade	2010	[Not Available]	-17635	Dead	WITH TUMOR	#N/A	1163	[Not Available]	Distant Metastasis	Bone	#N/A	920	Progressive Disease	#N/A	#N/A	1	1163	1	1163	#N/A
TCGA-DK-AA6M-01A-11R-A39I-07	19.7418	2.4753	0	0	1.3692	905.432	2.7518	1.322	72.5463	0	0	0	0	0	0	0	0	0	14.8384	0.6745	TCGA-DK-AA6M	BLCA	64	FEMALE	WHITE	Stage II	[Not Applicable]	Muscle invasive urothelial carcinoma (pT2 or above)	High Grade	2010	[Not Available]	-23574	Alive	TUMOR FREE	1582	#N/A	[Not Available]	#N/A	#N/A	#N/A	#N/A	Partial Remission/Response	#N/A	#N/A	0	1582	0	1582	#N/A
TCGA-DK-AA74-01A-11R-A39I-07	627.226	10.8341	0	0	0	2394.95	0	2.1306	596.763	0	0	0	0	0	0	0.9066	0	0	6.3463	0.9066	TCGA-DK-AA74	BLCA	75	MALE	WHITE	Stage III	[Not Applicable]	Muscle invasive urothelial carcinoma (pT2 or above)	High Grade	2010	[Not Available]	-27730	Alive	TUMOR FREE	1708	#N/A	[Not Available]	#N/A	#N/A	#N/A	#N/A	Complete Remission/Response	#N/A	#N/A	0	1708	0	1708	0
TCGA-E5-A4TZ-01A-11R-A31N-07	517.311	4.8151	0.9757	0	0	541.17	5.8288	96.2952	40.8616	0.3168	0	0	0	0	0.6336	0	0.9503	0.6336	7.286	31.9949	TCGA-E5-A4TZ	BLCA	64	MALE	WHITE	Stage IV	[Not Applicable]	Muscle invasive urothelial carcinoma (pT2 or above)	High Grade	2010	[Not Available]	-23566	Dead	WITH TUMOR	#N/A	467	[Not Available]	Locoregional (Urothelial tumor event)	Other, specify	soft tissue pelvic mass	435	Progressive Disease	#N/A	#N/A	1	467	1	467	#N/A
TCGA-E7-A3X6-01A-12R-A22U-07	6108.03	23.9408	0	0.7188	0	2791.34	5.1755	35.5603	287.67	0.4228	0	0	0	0	0.8457	0	1.2685	0	3.8055	14.3763	TCGA-E7-A3X6	BLCA	70	MALE	WHITE	Stage II	[Not Applicable]	Muscle invasive urothelial carcinoma (pT2 or above)	Low Grade	2011	[Not Available]	-25584	Dead	WITH TUMOR	#N/A	904	[Not Available]	Distant Metastasis	Bone	#N/A	369	Complete Remission/Response	#N/A	#N/A	1	904	1	904	1
TCGA-E7-A3Y1-01A-11R-A22U-07	385.695	90.9521	13.6507	9.4334	3.9019	3404.36	3.9486	273.522	625.87	0	0	0	4.7138	0	49.6495	0	0.5841	0	0	4.6729	TCGA-E7-A3Y1	BLCA	57	MALE	WHITE	Stage II	[Not Applicable]	Muscle invasive urothelial carcinoma (pT2 or above)	Low Grade	2012	[Not Available]	-20917	Alive	TUMOR FREE	163	#N/A	[Not Available]	#N/A	#N/A	#N/A	#N/A	Complete Remission/Response	#N/A	#N/A	0	163	0	163	0
TCGA-FD-A3B5-01A-11R-A20F-07	454.292	15.9071	2.8761	1.0103	0	1688.61	115.092	5.944	76.1504	3.3186	0	0.3687	0	0	0	0.7375	3.3186	0.7375	42.7729	195.428	TCGA-FD-A3B5	BLCA	86	MALE	BLACK OR AFRICAN AMERICAN	Stage IV	[Not Applicable]	Muscle invasive urothelial carcinoma (pT2 or above)	High Grade	2011	[Not Available]	-31442	Dead	WITH TUMOR	#N/A	272	[Not Available]	#N/A	#N/A	#N/A	#N/A	Progressive Disease	#N/A	#N/A	1	272	1	272	#N/A
TCGA-FD-A3B6-01A-21R-A20F-07	10.2326	0	0	0	0	41.7855	2.4513	1.1386	0	0	0	0	0	0	0	0	0	0	5.6743	315.113	TCGA-FD-A3B6	BLCA	75	MALE	WHITE	Stage II	[Not Applicable]	Muscle invasive urothelial carcinoma (pT2 or above)	High Grade	2011	[Not Available]	-27541	Dead	TUMOR FREE	#N/A	1005	[Not Available]	#N/A	#N/A	#N/A	#N/A	Complete Remission/Response	#N/A	#N/A	1	1005	0	1005	0
TCGA-FD-A3N5-01A-11R-A21D-07	0	0	0	0	0	109.797	199.258	0	3.5645	0.613	0	0	0	0	0	0	1.226	0	0.9195	153.858	TCGA-FD-A3N5	BLCA	69	MALE	BLACK OR AFRICAN AMERICAN	Stage II	[Not Applicable]	Muscle invasive urothelial carcinoma (pT2 or above)	High Grade	2011	[Not Available]	-25342	Dead	WITH TUMOR	#N/A	685	[Not Available]	Locoregional (Urothelial tumor event)	Other, specify	Pelvis	346	[Not Available]	#N/A	#N/A	1	685	1	685	#N/A
TCGA-FD-A3N6-01A-11R-A21D-07	1.7985	4.5661	4.6183	1.0282	0.9237	1174.54	304.109	0	60.1743	1.3942	0	0	0	0	0	0	0	0	1.0457	23.0045	TCGA-FD-A3N6	BLCA	43	FEMALE	BLACK OR AFRICAN AMERICAN	Stage II	[Not Applicable]	Muscle invasive urothelial carcinoma (pT2 or above)	High Grade	2011	[Not Available]	-15758	Alive	TUMOR FREE	851	#N/A	[Not Available]	#N/A	#N/A	#N/A	#N/A	Complete Remission/Response	#N/A	#N/A	0	851	0	851	0
TCGA-FD-A3SM-01A-11R-A22U-07	988.231	69.156	16.1287	1.216	2.4919	10437.1	134.399	8.3491	328.337	0	0	0	0	0	0	0	0	0	0.8563	46.6692	TCGA-FD-A3SM	BLCA	70	MALE	WHITE	Stage IV	[Not Applicable]	Muscle invasive urothelial carcinoma (pT2 or above)	High Grade	2011	[Not Available]	-25852	Dead	WITH TUMOR	#N/A	547	[Not Available]	Distant Metastasis	Lymph Node Only	#N/A	144	[Unknown]	#N/A	#N/A	1	547	1	547	#N/A
TCGA-FD-A3SO-01A-11R-A22U-07	10.0354	2.595	0	0	0	95.9372	581.711	2.4094	11.5606	0	0	0	0	0	0	0	0	0	2.6525	0.8842	TCGA-FD-A3SO	BLCA	68	MALE	WHITE	Stage IV	[Not Applicable]	Muscle invasive urothelial carcinoma (pT2 or above)	High Grade	2012	[Not Available]	-25147	Dead	WITH TUMOR	#N/A	168	[Not Available]	Locoregional (Urothelial tumor event)	Renal Pelvis	#N/A	143	Progressive Disease	#N/A	#N/A	1	168	1	168	#N/A
TCGA-FD-A3SR-01A-11R-A22U-07	0.7326	0	0	0	0.5737	1.7829	0	0	0	0	0	0.4413	0.4413	0	0	0	39.7185	0	17.6527	159.757	TCGA-FD-A3SR	BLCA	68	MALE	WHITE	Stage IV	[Not Applicable]	Muscle invasive urothelial carcinoma (pT2 or above)	High Grade	2010	[Not Available]	-24979	Dead	WITH TUMOR	#N/A	602	[Not Available]	Locoregional (Urothelial tumor event)	Other, specify	pelvis	372	[Unknown]	#N/A	#N/A	1	602	1	602	#N/A
TCGA-FD-A3SS-01A-12R-A22U-07	0	7.0584	0	1.1615	0.5911	707.519	112.368	0	19.4089	0	0	0	0	0	0	0	30.2405	0	1.7182	97.9381	TCGA-FD-A3SS	BLCA	66	MALE	WHITE	Stage IV	[Not Applicable]	Muscle invasive urothelial carcinoma (pT2 or above)	High Grade	2012	[Not Available]	-24408	Dead	WITH TUMOR	#N/A	391	[Not Available]	Locoregional (Urothelial tumor event)	Other, specify	local & retroperitonium	220	[Unknown]	#N/A	#N/A	1	391	1	391	#N/A
TCGA-FD-A43Y-01A-21R-A26T-07	4002.63	35.5054	7.527	12.3077	4.2276	6684.03	718.639	62.314	507.139	9.5359	0	0	0	0	0.6357	0.6357	0	8.2645	6.3573	0	TCGA-FD-A43Y	BLCA	65	MALE	WHITE	Stage III	[Not Applicable]	Muscle invasive urothelial carcinoma (pT2 or above)	High Grade	2012	[Not Available]	-23889	Dead	TUMOR FREE	#N/A	474	[Not Available]	#N/A	#N/A	#N/A	#N/A	Complete Remission/Response	#N/A	#N/A	1	474	0	474	0
TCGA-FD-A5BT-01A-11R-A26T-07	0	3.4877	0	0	0	0	0	0	0.0211	0	0	0	0	0	0	0	0	0	2.1053	2.1053	TCGA-FD-A5BT	BLCA	84	MALE	WHITE	Stage III	[Not Applicable]	Muscle invasive urothelial carcinoma (pT2 or above)	High Grade	2011	[Not Available]	-30686	Dead	TUMOR FREE	#N/A	328	[Not Available]	#N/A	#N/A	#N/A	#N/A	[Not Applicable]	#N/A	#N/A	1	328	0	328	#N/A
TCGA-FD-A5BX-01A-11R-A26T-07	0	0	0	0	0	154.526	0	14.1579	19.4803	0	0	0.6579	1.3158	0	0	0	1.3158	0	87.5	0	TCGA-FD-A5BX	BLCA	82	MALE	WHITE	Stage IV	[Not Applicable]	Muscle invasive urothelial carcinoma (pT2 or above)	High Grade	2012	[Not Available]	-30276	Dead	WITH TUMOR	#N/A	173	[Not Available]	Locoregional (Urothelial tumor event)	Lymph Node Only	#N/A	99	Progressive Disease	#N/A	#N/A	1	173	1	173	#N/A
TCGA-FD-A5C1-01A-11R-A28M-07	135.789	8.6864	3.0076	0.9836	2.0085	2498.57	23.2328	0	463.228	0	0	0	0	0	0	0	0	0	16.0476	0	TCGA-FD-A5C1	BLCA	61	FEMALE	WHITE	Stage III	[Not Applicable]	Muscle invasive urothelial carcinoma (pT2 or above)	High Grade	2009	[Not Available]	-22505	Alive	TUMOR FREE	1792	#N/A	[Not Available]	#N/A	#N/A	#N/A	#N/A	Complete Remission/Response	#N/A	#N/A	0	1792	0	1792	0
TCGA-FD-A62P-01A-32R-A30C-07	1.6	21.1549	4.1119	0	0	1843.28	1.0375	0	147.659	0	0	0	0	0	0	0	0	0	2.1843	0	TCGA-FD-A62P	BLCA	76	MALE	WHITE	Stage II	[Not Applicable]	Muscle invasive urothelial carcinoma (pT2 or above)	High Grade	2012	[Not Available]	-27843	Dead	WITH TUMOR	#N/A	191	[Not Available]	#N/A	#N/A	#N/A	#N/A	[Not Applicable]	#N/A	#N/A	1	191	1	191	#N/A
TCGA-FD-A6TC-01A-21R-A33J-07	4.8291	63.4708	11.043	1.4465	1.3804	5371.43	0	0.7144	210.514	1.7641	0	0.441	0.882	0	0.441	0	25.5788	0	37.9272	0.882	TCGA-FD-A6TC	BLCA	79	FEMALE	WHITE	Stage III	[Not Applicable]	Muscle invasive urothelial carcinoma (pT2 or above)	High Grade	2013	[Not Available]	-28963	Alive	TUMOR FREE	187	#N/A	[Not Available]	#N/A	#N/A	#N/A	#N/A	Complete Remission/Response	#N/A	#N/A	0	187	0	187	0
TCGA-FD-A6TG-01A-11R-A32O-07	2.0865	9.5148	15.7299	0	0	1826.18	0	0	122.624	0	0	0	0.4044	0	3.2349	0	0	0	0	2.4262	TCGA-FD-A6TG	BLCA	73	MALE	WHITE	Stage IV	[Not Applicable]	Muscle invasive urothelial carcinoma (pT2 or above)	High Grade	2013	[Not Available]	-26893	Dead	TUMOR FREE	#N/A	93	[Not Available]	#N/A	#N/A	#N/A	#N/A	[Not Applicable]	#N/A	#N/A	1	93	0	93	#N/A
TCGA-FD-A6TK-01A-42R-A33J-07	0	0	3.1119	0	0	52.7782	0	0	8.4945	0	0	0	0	0	0	0	0	0	0	1.7169	TCGA-FD-A6TK	BLCA	60	MALE	WHITE	Stage III	[Not Applicable]	Muscle invasive urothelial carcinoma (pT2 or above)	High Grade	2013	[Not Available]	-21942	Alive	TUMOR FREE	330	#N/A	[Not Available]	#N/A	#N/A	#N/A	#N/A	Complete Remission/Response	#N/A	#N/A	0	330	0	330	0
TCGA-FJ-A871-01A-11R-A352-07	4.6759	2.9905	0	0	0	252.45	0	63.4615	23.4399	0	0	0	0	0	0	0	2.5929	0	25.0648	5.1858	TCGA-FJ-A871	BLCA	49	MALE	WHITE	Stage III	[Not Applicable]	Muscle invasive urothelial carcinoma (pT2 or above)	High Grade	2013	[Not Available]	-18051	Dead	WITH TUMOR	#N/A	272	[Not Available]	Locoregional (Urothelial tumor event)	Other, specify	Pelvic	106	Progressive Disease	#N/A	#N/A	1	272	1	272	#N/A
TCGA-FT-A61P-01A-11R-A30C-07	6.3609	0	0	0	0	12.2732	0	4.5464	0	0	0	0	0	0	0	0	4.4379	0	10.8481	480.769	TCGA-FT-A61P	BLCA	76	MALE	WHITE	Stage IV	[Not Applicable]	Muscle invasive urothelial carcinoma (pT2 or above)	High Grade	2013	[Not Available]	-28082	Alive	TUMOR FREE	337	#N/A	[Not Available]	#N/A	#N/A	#N/A	#N/A	Complete Remission/Response	#N/A	#N/A	0	337	0	337	#N/A
TCGA-G2-A2EJ-01A-11R-A180-07	5.1835	1.527	0	0	0	19.4806	0	2.5485	0	0	0.3463	0.3463	0	0	0	0	2.4238	0	0.3463	916.205	TCGA-G2-A2EJ	BLCA	56	FEMALE	WHITE	Stage II	[Not Applicable]	Muscle invasive urothelial carcinoma (pT2 or above)	High Grade	2009	[Not Available]	-20649	Alive	TUMOR FREE	1460	#N/A	[Not Available]	Distant Metastasis	Lung	#N/A	910	Complete Remission/Response	#N/A	#N/A	0	1460	0	1460	1
TCGA-G2-A2EL-01A-12R-A18C-07	0	0	0	0	0	0.6112	0	0	0	4184.6	0	0	0	0	1.2225	5.8068	0	0	7.9462	242.054	TCGA-G2-A2EL	BLCA	77	MALE	WHITE	Stage II	[Not Applicable]	Muscle invasive urothelial carcinoma (pT2 or above)	High Grade	2009	[Not Available]	-28370	Dead	WITH TUMOR	#N/A	819	[Not Available]	Distant Metastasis	Bone	#N/A	105	Stable Disease	#N/A	#N/A	1	819	1	819	#N/A
TCGA-G2-A3IB-01A-11R-A20F-07	3289.57	54.7163	12.674	5.643	2.534	4814.68	179.126	32.0877	299.962	1.8911	0	0	0	0	0	0	0	0	0	0.3782	TCGA-G2-A3IB	BLCA	66	MALE	BLACK OR AFRICAN AMERICAN	Stage II	[Not Applicable]	Muscle invasive urothelial carcinoma (pT2 or above)	High Grade	2008	[Not Available]	-24149	Dead	WITH TUMOR	#N/A	220	[Not Available]	#N/A	#N/A	#N/A	#N/A	Progressive Disease	#N/A	#N/A	1	220	1	220	#N/A
TCGA-G2-AA3C-01A-21R-A39I-07	175.814	0	0	0	0	607.236	12.8359	4.7406	48.4088	0.6271	0	0	0	0	0	0	0	0	0.6271	55.8081	TCGA-G2-AA3C	BLCA	66	MALE	WHITE	Stage IV	[Not Applicable]	Muscle invasive urothelial carcinoma (pT2 or above)	High Grade	2009	[Not Available]	-24267	Dead	WITH TUMOR	#N/A	211	[Not Available]	#N/A	#N/A	#N/A	#N/A	[Unknown]	#N/A	#N/A	1	211	1	211	#N/A
TCGA-GC-A3BM-01A-11R-A22U-07	9640.95	123.191	12.8853	1.1405	1.1732	1182.55	116.172	479.122	677.299	6.5408	0	0	0	0	3.2704	0.4088	0	0	4.4968	45.7853	TCGA-GC-A3BM	BLCA	70	MALE	WHITE	Stage II	[Not Applicable]	Muscle invasive urothelial carcinoma (pT2 or above)	High Grade	2010	[Not Available]	-25609	Dead	WITH TUMOR	#N/A	651	[Not Available]	#N/A	#N/A	#N/A	#N/A	Progressive Disease	#N/A	#N/A	1	651	1	651	#N/A
TCGA-GC-A3RC-01A-11R-A22U-07	0	0	0	0	0	51.8744	2.746	0	2.0806	0	0	0	0	0	0	0	0.4686	0	7.0291	55.2952	TCGA-GC-A3RC	BLCA	59	MALE	WHITE	Stage II	[Not Applicable]	Muscle invasive urothelial carcinoma (pT2 or above)	High Grade	2011	[Not Available]	-21668	Alive	TUMOR FREE	484	#N/A	[Not Available]	#N/A	#N/A	#N/A	#N/A	Complete Remission/Response	#N/A	#N/A	0	484	0	484	0
TCGA-GU-A42Q-01A-11R-A23W-07	4218.56	167.082	66.4674	3.244	2.2135	10358.7	41.4221	36.0923	754.608	16.488	0	0	0	0	0	0	0.4122	0	0.8244	229.184	TCGA-GU-A42Q	BLCA	67	MALE	WHITE	Stage III	[Not Applicable]	Muscle invasive urothelial carcinoma (pT2 or above)	High Grade	2012	[Not Available]	-24534	Dead	TUMOR FREE	#N/A	344	[Not Available]	#N/A	#N/A	#N/A	#N/A	Complete Remission/Response	#N/A	#N/A	1	344	0	344	0
TCGA-GU-A42R-01A-11R-A23N-07	13488.5	164.891	15.7169	9.6812	7.1444	3008.69	237.328	128.513	1375.22	0.8629	0	0.4314	3.02	0	33.6513	1.2943	0	0	2.1571	0	TCGA-GU-A42R	BLCA	68	MALE	WHITE	Stage IV	[Not Applicable]	Muscle invasive urothelial carcinoma (pT2 or above)	High Grade	2012	[Not Available]	-25134	Dead	WITH TUMOR	#N/A	577	[Not Available]	Distant Metastasis	Lung	#N/A	91	Progressive Disease	#N/A	#N/A	1	577	1	577	#N/A
TCGA-GU-AATO-01A-11R-A39I-07	17.626	0	0	0	0	94.7136	0	0	9.0768	0	0	0	0	0	0	0	66.486	0	7.2267	0	TCGA-GU-AATO	BLCA	75	MALE	WHITE	Stage IV	[Not Applicable]	Muscle invasive urothelial carcinoma (pT2 or above)	High Grade	2013	[Not Available]	-27684	Dead	WITH TUMOR	#N/A	324	[Not Available]	#N/A	#N/A	#N/A	#N/A	Progressive Disease	#N/A	#N/A	1	324	1	324	#N/A
TCGA-GV-A40E-01A-12R-A23N-07	2557.12	44.8725	11.5951	0.9345	0.9666	8442.77	34.1357	15.5698	1947.1	0	0	0.4011	0	0	0	0	69.3864	0	2.0054	0.8022	TCGA-GV-A40E	BLCA	75	MALE	WHITE	Stage II	[Not Applicable]	Muscle invasive urothelial carcinoma (pT2 or above)	High Grade	2012	[Not Available]	-27569	Dead	WITH TUMOR	#N/A	261	[Not Available]	Distant Metastasis	Lung	#N/A	219	Stable Disease	#N/A	#N/A	1	261	1	261	#N/A
TCGA-K4-A54R-01A-11R-A26T-07	0	373.579	3.5421	0.9194	0	3457.77	0	3.3829	160.218	0	0	1.1787	0	0	0	0	41.8447	0	1.7681	0.5894	TCGA-K4-A54R	BLCA	59	MALE	WHITE	Stage II	[Not Applicable]	Muscle invasive urothelial carcinoma (pT2 or above)	High Grade	2012	[Not Available]	-21601	Alive	TUMOR FREE	842	#N/A	[Not Available]	#N/A	#N/A	#N/A	#N/A	Complete Remission/Response	#N/A	#N/A	0	842	0	842	0
TCGA-K4-A5RH-01A-11R-A30C-07	1464.95	1.6065	0	0.7888	0	455.98	0	16.9668	66.5814	0	0	0	0	0	0	0.2412	0	0	6.9951	0.4824	TCGA-K4-A5RH	BLCA	69	MALE	WHITE	Stage III	[Not Applicable]	Muscle invasive urothelial carcinoma (pT2 or above)	High Grade	2012	[Not Available]	-25305	Alive	WITH TUMOR	276	#N/A	[Not Available]	Distant Metastasis	Lung	#N/A	196	Progressive Disease	#N/A	#N/A	0	276	0	276	#N/A
TCGA-K4-A5RJ-01A-11R-A28M-07	0	4.9915	0	0	0	51.6487	77.0085	15.1331	8.7252	0	0	0	0	0	0	1.1331	0	0	3.3994	145.609	TCGA-K4-A5RJ	BLCA	75	MALE	WHITE	Stage II	[Not Applicable]	Muscle invasive urothelial carcinoma (pT2 or above)	High Grade	2012	[Not Available]	-27518	Alive	TUMOR FREE	539	#N/A	[Not Available]	#N/A	#N/A	#N/A	#N/A	Complete Remission/Response	#N/A	#N/A	0	539	0	539	0
TCGA-KQ-A41O-01A-12R-A352-07	1055.92	25.8946	7.1817	2.3037	2.3918	4640.89	2.4233	27.0087	505.064	2.5177	0	0	0.6294	0	3.7766	0	8.812	0	1.2589	8.812	TCGA-KQ-A41O	BLCA	84	MALE	[Unknown]	Stage IV	[Not Applicable]	Muscle invasive urothelial carcinoma (pT2 or above)	High Grade	2011	[Not Available]	-30774	Alive	TUMOR FREE	1538	#N/A	[Not Available]	#N/A	#N/A	#N/A	#N/A	Complete Remission/Response	#N/A	#N/A	0	1538	0	1538	#N/A
TCGA-PQ-A6FI-01A-11R-A31N-07	0	0	0	0	0	1.4106	0	0	0	0	0	0	0	0	0	0	0.3526	0	18.3373	163.273	TCGA-PQ-A6FI	BLCA	70	MALE	WHITE	Stage II	[Not Applicable]	Muscle invasive urothelial carcinoma (pT2 or above)	High Grade	2011	[Not Available]	-25672	Alive	TUMOR FREE	372	#N/A	[Not Available]	#N/A	#N/A	#N/A	#N/A	Complete Remission/Response	#N/A	#N/A	0	372	0	372	0
TCGA-SY-A9G5-01A-11R-A38B-07	2739.15	8.4228	0	2.0631	2.137	1493.79	54.1176	18.1813	647.184	0	0	0	0	0	0	0	0	0	7.9568	0	TCGA-SY-A9G5	BLCA	66	MALE	WHITE	Stage III	[Not Applicable]	Muscle invasive urothelial carcinoma (pT2 or above)	High Grade	2011	[Not Available]	-24260	Alive	TUMOR FREE	1186	#N/A	[Not Available]	#N/A	#N/A	#N/A	#N/A	Complete Remission/Response	#N/A	#N/A	0	1186	0	1186	0
TCGA-UY-A78L-01A-12R-A33J-07	47.6933	0	0	0	0	38.7004	2.2942	1.9933	0	0.4179	0	0	0	0	0	0	0.4179	0.4179	1.6715	0.4179	TCGA-UY-A78L	BLCA	62	MALE	WHITE	Stage IV	[Not Applicable]	Muscle invasive urothelial carcinoma (pT2 or above)	High Grade	#N/A	[Not Available]	-22717	Alive	WITH TUMOR	1127	#N/A	[Not Available]	#N/A	#N/A	#N/A	355	Progressive Disease	#N/A	#N/A	0	1127	0	1127	#N/A
TCGA-UY-A78M-01A-21R-A352-07	0	13.3206	13.4874	3.2682	0	5704.34	0	0	500.462	0.4764	0	0	0.9528	0	0	0	0.4764	0	0	0	TCGA-UY-A78M	BLCA	81	FEMALE	ASIAN	Stage IV	[Not Applicable]	Muscle invasive urothelial carcinoma (pT2 or above)	High Grade	#N/A	[Not Available]	-29706	Dead	WITH TUMOR	#N/A	690	[Not Available]	#N/A	#N/A	#N/A	#N/A	[Unknown]	#N/A	#N/A	1	690	1	690	#N/A
TCGA-UY-A8OD-01A-11R-A36F-07	2.0913	19.1363	8.612	10.4442	0	4950.8	0	0	839.272	47.5015	3.0845	0	0	0	0	4.3183	19.7409	0	0	2.4676	TCGA-UY-A8OD	BLCA	68	FEMALE	BLACK OR AFRICAN AMERICAN	Stage II	[Not Applicable]	Muscle invasive urothelial carcinoma (pT2 or above)	High Grade	#N/A	[Not Available]	-24588	Alive	TUMOR FREE	3432	#N/A	[Not Available]	#N/A	#N/A	#N/A	#N/A	Complete Remission/Response	#N/A	#N/A	0	3432	0	3432	0
TCGA-XF-A9SI-01A-11R-A39I-07	30.2977	4.5046	0.9468	0	0.9468	243.616	0	3.6554	11.7862	0.488	0.488	0	0.488	0	0.488	0	0.9761	0.488	21.4739	379.697	TCGA-XF-A9SI	BLCA	73	FEMALE	ASIAN	Stage II	[Not Applicable]	Muscle invasive urothelial carcinoma (pT2 or above)	High Grade	2006	[Not Available]	-26719	Alive	TUMOR FREE	2423	#N/A	[Not Available]	#N/A	#N/A	#N/A	#N/A	Complete Remission/Response	#N/A	#N/A	0	2423	0	2423	0
TCGA-XF-A9SJ-01A-11R-A39I-07	358.316	76.0072	0	0	0	2123.55	358.394	16.0124	240.759	0	0	0	0	0	0	0	8.781	0	8.781	38.7397	TCGA-XF-A9SJ	BLCA	83	MALE	WHITE	Stage IV	[Not Applicable]	Muscle invasive urothelial carcinoma (pT2 or above)	High Grade	2004	[Not Available]	-30362	Dead	WITH TUMOR	#N/A	98	[Not Available]	#N/A	#N/A	#N/A	#N/A	Progressive Disease	#N/A	#N/A	1	98	1	98	#N/A
TCGA-XF-A9SM-01A-11R-A42T-07	0	4.4639	4.0984	0	0	1989.68	0	1.9639	200.088	0	0	0	0	0	0	0.4873	0	0	66.7641	144.25	TCGA-XF-A9SM	BLCA	76	MALE	WHITE	Stage III	[Not Applicable]	Muscle invasive urothelial carcinoma (pT2 or above)	High Grade	2004	[Not Available]	-27826	Alive	TUMOR FREE	1048	#N/A	[Not Available]	#N/A	#N/A	#N/A	#N/A	Complete Remission/Response	#N/A	#N/A	0	1048	0	1048	0
TCGA-XF-A9SX-01A-21R-A39I-07	0	0	0	0	0	111.785	0	30.2962	0	0	0	0	0	0	0	0	0	0	0.7286	18.2156	TCGA-XF-A9SX	BLCA	63	FEMALE	WHITE	Stage IV	[Not Applicable]	Muscle invasive urothelial carcinoma (pT2 or above)	High Grade	2006	[Not Available]	-23349	Dead	WITH TUMOR	#N/A	719	[Not Available]	Distant Metastasis	Lung	#N/A	475	Progressive Disease	#N/A	#N/A	1	719	1	719	#N/A
TCGA-XF-A9SY-01A-21R-A42T-07	1.5724	0	0	0	0	2.0012	0	0	0	0	0	0	0	0	0	0.5956	0	0	43.4783	174.509	TCGA-XF-A9SY	BLCA	60	FEMALE	WHITE	Stage IV	[Not Applicable]	Muscle invasive urothelial carcinoma (pT2 or above)	High Grade	2006	[Not Available]	-22212	Alive	WITH TUMOR	640	#N/A	[Not Available]	Distant Metastasis	Other, specify	Groin	168	Progressive Disease	#N/A	#N/A	0	640	0	640	#N/A
TCGA-XF-A9SZ-01A-11R-A39I-07	0	64.8437	0	0	2.8425	1107.56	1.4383	0	51.8476	0	0	0	0	0	0	0	0	0	2.274	0.5685	TCGA-XF-A9SZ	BLCA	79	MALE	WHITE	Stage IV	[Not Applicable]	Muscle invasive urothelial carcinoma (pT2 or above)	High Grade	2007	[Not Available]	-29100	Dead	WITH TUMOR	#N/A	859	[Not Available]	Distant Metastasis	Lung	#N/A	854	Complete Remission/Response	#N/A	#N/A	1	859	1	859	#N/A
TCGA-XF-A9T5-01A-11R-A42T-07	0	0	0	0	0	27.9334	0	0	13.2989	1.1615	0	0	0	0	0	0	0	0.5807	41.2323	4.6459	TCGA-XF-A9T5	BLCA	78	FEMALE	WHITE	Stage IV	[Not Applicable]	Muscle invasive urothelial carcinoma (pT2 or above)	High Grade	2008	[Not Available]	-28578	Alive	TUMOR FREE	2027	#N/A	[Not Available]	Locoregional (Urothelial tumor event)	Other, specify	Vagina	664	Complete Remission/Response	#N/A	#N/A	0	2027	0	2027	#N/A
TCGA-XF-AAMY-01A-11R-A42T-07	3028.3	26.459	4.7397	2.2978	0	378.623	7.1968	38.3196	214.834	0	0	0.7584	0	0	0	0	30.3342	0	2.2751	0	TCGA-XF-AAMY	BLCA	78	MALE	WHITE	Stage III	[Not Applicable]	Muscle invasive urothelial carcinoma (pT2 or above)	High Grade	2006	[Not Available]	-28509	Alive	TUMOR FREE	3011	#N/A	[Not Available]	Distant Metastasis	Lung	#N/A	637	Complete Remission/Response	#N/A	#N/A	0	3011	0	3011	1
TCGA-XF-AAN2-01A-11R-A42T-07	2.1447	21.9538	0	0	0	119.264	21.7387	0	10.5015	0	0	0	0	0	0	0	0.6941	0	19.4343	97.1716	TCGA-XF-AAN2	BLCA	73	MALE	WHITE	Stage II	[Not Applicable]	Muscle invasive urothelial carcinoma (pT2 or above)	High Grade	2007	[Not Available]	-26720	Dead	TUMOR FREE	#N/A	1869	[Not Available]	#N/A	#N/A	#N/A	#N/A	Complete Remission/Response	#N/A	#N/A	1	1869	0	1869	0
TCGA-XF-AAN4-01A-11R-A42T-07	4.1651	0	0	0	0	115.966	0	1.7511	5.086	0	0	0	0	0	0	0	0	0	1.3953	2.7907	TCGA-XF-AAN4	BLCA	77	FEMALE	WHITE	Stage III	[Not Applicable]	Muscle invasive urothelial carcinoma (pT2 or above)	High Grade	2007	[Not Available]	-28302	Dead	TUMOR FREE	#N/A	823	[Not Available]	#N/A	#N/A	#N/A	#N/A	Complete Remission/Response	#N/A	#N/A	1	823	0	823	0
TCGA-XF-AAN5-01A-11R-A42T-07	1685.42	26.386	1.5799	2.8855	2.9612	893.898	17.4172	1158.81	405.534	0	0	0	0	0	0	0	0.9461	0	1.8921	2.8382	TCGA-XF-AAN5	BLCA	61	FEMALE	WHITE	Stage III	[Not Applicable]	Muscle invasive urothelial carcinoma (pT2 or above)	High Grade	2008	[Not Available]	-22411	Alive	TUMOR FREE	2293	#N/A	[Not Available]	#N/A	#N/A	#N/A	#N/A	Complete Remission/Response	#N/A	#N/A	0	2293	0	2293	0
TCGA-XF-AAN7-01A-11R-A42T-07	0	0	0	0	0	0	0	0	0	0	0	0	0	0	0	0	0	0	0	81.1496	TCGA-XF-AAN7	BLCA	60	MALE	WHITE	Stage IV	[Not Applicable]	Muscle invasive urothelial carcinoma (pT2 or above)	High Grade	2008	[Not Available]	-21951	Dead	WITH TUMOR	#N/A	565	[Not Available]	Locoregional (Urothelial tumor event)	Bladder	#N/A	321	Complete Remission/Response	#N/A	#N/A	1	565	1	565	#N/A
TCGA-YC-A9TC-01A-22R-A39I-07	6.5081	0	0	0	0	4.1079	0	0	0	15.6933	0	0.4616	2.7694	0	8.3082	0	0	0	5.0772	190.166	TCGA-YC-A9TC	BLCA	71	MALE	WHITE	Stage IV	[Not Applicable]	Muscle invasive urothelial carcinoma (pT2 or above)	High Grade	2013	[Not Available]	-26283	Dead	WITH TUMOR	#N/A	20	[Not Available]	#N/A	#N/A	#N/A	#N/A	Progressive Disease	#N/A	#N/A	1	20	1	20	#N/A
TCGA-YF-AA3M-01A-11R-A42T-07	1804.56	24.8486	1.2626	0	1.2626	2805.32	2.2872	57.5832	367.844	0	0	0	0	0	0	0	0.7215	0	14.4301	197.692	TCGA-YF-AA3M	BLCA	57	MALE	[Unknown]	Stage II	[Not Applicable]	Muscle invasive urothelial carcinoma (pT2 or above)	High Grade	2013	[Not Available]	-21097	Alive	WITH TUMOR	415	#N/A	[Not Available]	Locoregional (Urothelial tumor event)	Other, specify	Pelvis	381	Complete Remission/Response	#N/A	#N/A	0	415	0	415	1
TCGA-ZF-A9R1-01A-11R-A39I-07	15054.3	844.78	7.8156	10.6241	0	213.499	23.74	856.383	1740.13	0.9456	0	0	0.4728	0	2.3641	0.4728	0.4728	0	3.3097	18.4397	TCGA-ZF-A9R1	BLCA	81	MALE	WHITE	Stage IV	[Not Applicable]	Muscle invasive urothelial carcinoma (pT2 or above)	High Grade	2013	[Not Available]	-29610	Alive	WITH TUMOR	773	#N/A	[Not Available]	Distant Metastasis	Bone	#N/A	758	Complete Remission/Response	#N/A	#N/A	0	773	0	773	#N/A
TCGA-ZF-A9RF-01A-11R-A38B-07	1.2831	0	0	0	1.3264	166.472	1.3394	0.6632	7.0741	0	0.4335	0.4335	0	0	0	0.4335	61.9853	0.4335	8.2358	449.068	TCGA-ZF-A9RF	BLCA	74	MALE	WHITE	Stage II	[Not Applicable]	Muscle invasive urothelial carcinoma (pT2 or above)	High Grade	2009	[Not Available]	-27281	Alive	TUMOR FREE	1949	#N/A	[Not Available]	Locoregional (Urothelial tumor event)	Bladder	#N/A	1565	Complete Remission/Response	#N/A	#N/A	0	1949	0	1949	1
TCGA-ZF-AA4U-01A-11R-A38B-07	7659.02	150	0	0	0	3219.03	1.8753	61.458	303.756	1.0565	0	0	1.5848	0	9.5087	0	1.0565	0	0	21.6587	TCGA-ZF-AA4U	BLCA	70	MALE	WHITE	Stage III	[Not Applicable]	Muscle invasive urothelial carcinoma (pT2 or above)	High Grade	2008	[Not Available]	-25682	Dead	WITH TUMOR	#N/A	262	[Not Available]	Distant Metastasis	Bone	#N/A	199	Progressive Disease	#N/A	#N/A	1	262	1	262	#N/A
TCGA-ZF-AA4V-01A-11R-A38B-07	70.8716	4.3911	1.7197	0.839	0	1136.29	1.7322	0	124.45	0.4174	0	0	0	0	0	0	0	0	1.2522	2.087	TCGA-ZF-AA4V	BLCA	66	MALE	WHITE	Stage III	[Not Applicable]	Muscle invasive urothelial carcinoma (pT2 or above)	High Grade	2008	[Not Available]	-24448	Alive	TUMOR FREE	1806	#N/A	[Not Available]	#N/A	#N/A	#N/A	#N/A	Complete Remission/Response	#N/A	#N/A	0	1806	0	1806	0
[truncated: 3 more columns]

## Sheet: BRCA
gene_id	UGT1A10|54575	UGT1A1|54658	UGT1A3|54659	UGT1A4|54657	UGT1A5|54579	UGT1A6|54578	UGT1A7|54577	UGT1A8|54576	UGT1A9|54600	UGT2A1|10941	UGT2A3|79799	UGT2B10|7365	UGT2B11|10720	UGT2B15|7366	UGT2B28|54490	UGT2B4|7363	UGT2B7|7364	UGT3A1|133688	UGT3A2|167127	UGT8|7368	CYP2D6|1565	bcr_patient_barcode	type	age_at_initial_pathologic_diagnosis	gender	race	ajcc_pathologic_tumor_stage	clinical_stage	histological_type	histological_grade	initial_pathologic_dx_year	menopause_status	birth_days_to	vital_status	tumor_status	last_contact_days_to	death_days_to	cause_of_death	new_tumor_event_type	new_tumor_event_site	new_tumor_event_site_other	new_tumor_event_dx_days_to	treatment_outcome_first_course	margin_status	residual_tumor	OS	OS.time	DSS	DSS.time
TCGA-BH-A0WA-01A-11R-A109-07	0	0	0	3.6979	0	0	1.7754	0	0	0	0	0	0.3421	0	0	0	70.8106	0	20.8669	264.77	12.999	TCGA-BH-A0WA	BRCA	82	FEMALE	WHITE	Stage I	[Not Applicable]	[Not Available]	[Not Available]	2008	[Not Available]	-30025	Alive	TUMOR FREE	701	#N/A	[Not Available]	#N/A	#N/A	#N/A	#N/A	[Not Available]	Negative	#N/A	0	701	0	701
TCGA-A7-A5ZV-01A-11R-A28M-07	0	0	0	0	0	0	0	0	0	0	0	0	0	0	0	0	0	0	1789.61	21.5463	8.872	TCGA-A7-A5ZV	BRCA	62	FEMALE	BLACK OR AFRICAN AMERICAN	Stage IIA	[Not Applicable]	Infiltrating Carcinoma NOS	[Not Available]	2012	Post (prior bilateral ovariectomy OR >12 mo since LMP with no prior hysterectomy)	-22966	Alive	TUMOR FREE	368	#N/A	[Not Available]	#N/A	#N/A	#N/A	#N/A	[Not Available]	Negative	#N/A	0	368	0	368
TCGA-BH-A0B7-01A-12R-A115-07	1276.64	0	0	0	0	284.099	59.8678	12.8234	53.1308	0	1.0722	86.8477	5854.74	78.985	550.393	1.4296	45.747	0.3574	25.0179	38.9564	12.5089	TCGA-BH-A0B7	BRCA	42	FEMALE	WHITE	Stage IIB	[Not Applicable]	Infiltrating Ductal Carcinoma	[Not Available]	2006	Pre (<6 months since LMP AND no prior bilateral ovariectomy AND not on estrogen replacement)	-15593	Alive	TUMOR FREE	2559	#N/A	[Not Available]	#N/A	#N/A	#N/A	#N/A	[Not Available]	Negative	#N/A	0	2559	0	2559
TCGA-AN-A0AL-01A-11R-A00Z-07	847.5	1.2158	0	0	0	375.616	1.244	4.682	121.196	1.2077	0	0	0	8.4541	1.2077	0	206.522	0	0.8052	369.968	3.2206	TCGA-AN-A0AL	BRCA	41	FEMALE	WHITE	Stage IIIB	[Not Applicable]	Infiltrating Ductal Carcinoma	[Not Available]	2010	Pre (<6 months since LMP AND no prior bilateral ovariectomy AND not on estrogen replacement)	-15286	Alive	TUMOR FREE	227	#N/A	[Not Available]	#N/A	#N/A	#N/A	#N/A	[Not Available]	Negative	#N/A	0	227	0	227
TCGA-GM-A2DD-01A-11R-A180-07	255.354	5.1703	0	0	0	1358.99	14.2024	3.2911	163.016	5.4114	0	48.2106	6024.79	3.9356	7137.13	0.4919	80.6789	0.9839	0.4919	7.8711	11.8067	TCGA-GM-A2DD	BRCA	53	FEMALE	WHITE	Stage I	[Not Applicable]	Infiltrating Ductal Carcinoma	[Not Available]	2007	Post (prior bilateral ovariectomy OR >12 mo since LMP with no prior hysterectomy)	-19415	Alive	TUMOR FREE	2282	#N/A	[Not Available]	#N/A	#N/A	#N/A	#N/A	[Not Available]	Negative	#N/A	0	2282	0	2282
TCGA-E2-A150-01A-11R-A12D-07	197.811	1.0077	1.2384	0	0	1152.48	102.214	2.3553	29.3282	0	0	0	0	1.2141	0	0	1.6188	0	0.8094	84.1764	36.8272	TCGA-E2-A150	BRCA	48	FEMALE	WHITE	Stage IIA	[Not Applicable]	Infiltrating Ductal Carcinoma	[Not Available]	2009	Post (prior bilateral ovariectomy OR >12 mo since LMP with no prior hysterectomy)	-17580	Alive	TUMOR FREE	1935	#N/A	[Not Available]	#N/A	#N/A	#N/A	#N/A	[Not Available]	Negative	#N/A	0	1935	0	1935
TCGA-D8-A1JK-01A-11R-A13Q-07	110.575	0	0	0	0	26.9732	92.4693	8.2239	0	0	0	198.69	5077.63	6.1942	970.578	0	131.03	0	0.9529	0.4765	4.2883	TCGA-D8-A1JK	BRCA	90	FEMALE	WHITE	Stage IIA	[Not Applicable]	Infiltrating Ductal Carcinoma	[Not Available]	2010	Post (prior bilateral ovariectomy OR >12 mo since LMP with no prior hysterectomy)	-32872	Alive	TUMOR FREE	612	#N/A	[Not Available]	#N/A	#N/A	#N/A	#N/A	[Not Available]	Negative	#N/A	0	612	0	612
TCGA-E9-A1RH-01A-21R-A169-07	108.816	3.4795	4.2281	0	0	1215.86	11.8119	3.2131	64.0615	0	0	0.3172	4.7578	0	0.9516	0	0	0	298.47	57.093	0.9516	TCGA-E9-A1RH	BRCA	63	FEMALE	WHITE	Stage IIA	[Not Applicable]	Infiltrating Ductal Carcinoma	[Not Available]	2011	Post (prior bilateral ovariectomy OR >12 mo since LMP with no prior hysterectomy)	-23224	Alive	TUMOR FREE	1417	#N/A	[Not Available]	#N/A	#N/A	#N/A	#N/A	[Not Available]	Negative	#N/A	0	1417	0	1417
TCGA-A2-A3Y0-01A-11R-A239-07	56.8708	0	0	0	0	78.6998	90.4647	5.7823	0	0.3284	0	0	0	0	0	0.6567	2.2985	2.6268	13.1341	181.908	98.1777	TCGA-A2-A3Y0	BRCA	57	FEMALE	BLACK OR AFRICAN AMERICAN	Stage IIB	[Not Applicable]	Infiltrating Ductal Carcinoma	[Not Available]	2010	Post (prior bilateral ovariectomy OR >12 mo since LMP with no prior hysterectomy)	-21024	Alive	TUMOR FREE	1546	#N/A	[Not Available]	#N/A	#N/A	#N/A	#N/A	[Not Available]	Close	#N/A	0	1546	0	1546
TCGA-AN-A0AR-01A-11R-A00Z-07	41.302	1.0531	0	0	0	59.6808	0.6059	4.6993	12.035	7.5737	1.4426	1.082	0	0.3607	0	0.7213	54.0979	1.082	8.6557	133.081	5.7704	TCGA-AN-A0AR	BRCA	55	FEMALE	WHITE	Stage IIA	[Not Applicable]	Infiltrating Ductal Carcinoma	[Not Available]	2010	Pre (<6 months since LMP AND no prior bilateral ovariectomy AND not on estrogen replacement)	-20152	Alive	TUMOR FREE	10	#N/A	[Not Available]	#N/A	#N/A	#N/A	#N/A	[Not Available]	Negative	#N/A	0	10	0	10
TCGA-A7-A4SD-01A-11R-A266-07	27.8557	0	2.7313	0	0	87.8905	0	23.5572	12.6915	0	0	0	0	0	0.4975	0.4975	9.4527	0	127.363	10.4478	100	TCGA-A7-A4SD	BRCA	52	FEMALE	BLACK OR AFRICAN AMERICAN	Stage IIA	[Not Applicable]	Infiltrating Ductal Carcinoma	[Not Available]	2012	Post (prior bilateral ovariectomy OR >12 mo since LMP with no prior hysterectomy)	-19131	Alive	TUMOR FREE	441	#N/A	[Not Available]	#N/A	#N/A	#N/A	#N/A	[Not Available]	Negative	#N/A	0	441	0	441
TCGA-EW-A1PB-01A-11R-A144-07	23.3036	3.1562	0	0	0	135.536	4.46	3.6016	1.9492	0	0	0	0	0	0	0	15.8133	0	13.877	0.3227	19.6859	TCGA-EW-A1PB	BRCA	70	FEMALE	BLACK OR AFRICAN AMERICAN	Stage IIIA	[Not Applicable]	Infiltrating Ductal Carcinoma	[Not Available]	2009	Post (prior bilateral ovariectomy OR >12 mo since LMP with no prior hysterectomy)	-25770	Alive	TUMOR FREE	608	#N/A	[Not Available]	#N/A	#N/A	#N/A	#N/A	[Not Available]	Negative	#N/A	0	608	0	608
TCGA-BH-A0HF-01A-11R-A056-07	21.5892	0	4.164	0	0	1050.9	755.986	59.7361	146.684	10.7342	0	23.7048	5319.62	4.0253	62.6164	2641.97	0.4473	0	11.6288	24.5993	8.9452	TCGA-BH-A0HF	BRCA	77	FEMALE	WHITE	Stage IA	[Not Applicable]	Infiltrating Ductal Carcinoma	[Not Available]	2008	Post (prior bilateral ovariectomy OR >12 mo since LMP with no prior hysterectomy)	-28233	Alive	TUMOR FREE	727	#N/A	[Not Available]	#N/A	#N/A	#N/A	#N/A	[Not Available]	Negative	#N/A	0	727	0	727
TCGA-E2-A1LL-01A-11R-A144-07	19.761	3.092	16.3409	0	1.0191	2493.89	36.0386	0	137.21	1.1516	0	0	0	1.7274	0	0	2.8789	0	3.4547	21.3042	1.7274	TCGA-E2-A1LL	BRCA	73	FEMALE	BLACK OR AFRICAN AMERICAN	Stage IIIA	[Not Applicable]	Infiltrating Ductal Carcinoma	[Not Available]	2008	Post (prior bilateral ovariectomy OR >12 mo since LMP with no prior hysterectomy)	-27028	Alive	WITH TUMOR	1309	#N/A	[Not Available]	Distant Metastasis	Liver	#N/A	1303	[Not Available]	Negative	#N/A	0	1309	0	1309
TCGA-AO-A0JD-01A-11R-A056-07	15.2272	3.4653	4.8123	0	0	254.685	173.651	16.7096	14.1925	3.7626	1.8813	0	1.8813	33.8632	0.7525	0.3763	0.7525	0	14.2978	10.159	1.8813	TCGA-AO-A0JD	BRCA	59	FEMALE	WHITE	Stage IIIA	[Not Applicable]	Infiltrating Ductal Carcinoma	[Not Available]	2005	Post (prior bilateral ovariectomy OR >12 mo since LMP with no prior hysterectomy)	-21831	Alive	TUMOR FREE	2190	#N/A	[Not Available]	#N/A	#N/A	#N/A	#N/A	[Not Available]	Negative	#N/A	0	2190	0	2190
TCGA-GM-A2DB-01A-31R-A18M-07	15.0932	0	0	0	0	2097.14	0	0	297.166	0	0	14.9142	77.5541	15.66	316.928	0	319.165	0	8.2028	66.3684	23.1171	TCGA-GM-A2DB	BRCA	62	FEMALE	WHITE	Stage IIA	[Not Applicable]	Infiltrating Ductal Carcinoma	[Not Available]	2006	Post (prior bilateral ovariectomy OR >12 mo since LMP with no prior hysterectomy)	-22883	Alive	TUMOR FREE	2406	#N/A	[Not Available]	#N/A	#N/A	#N/A	#N/A	[Not Available]	Negative	#N/A	0	2406	0	2406
TCGA-UL-AAZ6-01A-11R-A41B-07	15.0028	0	0	0	0	7.8128	0	2.8864	17.8133	0	2.7946	3.9922	51.899	61.0811	0.3992	3.1938	6.3876	0.3992	15.1705	11.5775	25.9495	TCGA-UL-AAZ6	BRCA	73	FEMALE	BLACK OR AFRICAN AMERICAN	Stage IIA	[Not Applicable]	Infiltrating Ductal Carcinoma	[Not Available]	2013	Post (prior bilateral ovariectomy OR >12 mo since LMP with no prior hysterectomy)	-26999	Alive	TUMOR FREE	518	#N/A	[Not Available]	#N/A	#N/A	#N/A	#N/A	[Not Available]	[Not Available]	#N/A	0	518	0	518
TCGA-V7-A7HQ-01A-11R-A33J-07	13.4437	0	0	0	0	11.9719	0	9.1575	3.6026	0	17.8593	1.2317	5.5425	66.5104	0.6158	0	39.4136	4.9267	129.326	3.0792	3.0792	TCGA-V7-A7HQ	BRCA	75	FEMALE	BLACK OR AFRICAN AMERICAN	Stage IIIA	[Not Applicable]	Infiltrating Ductal Carcinoma	[Not Available]	2009	Post (prior bilateral ovariectomy OR >12 mo since LMP with no prior hysterectomy)	-27684	Alive	TUMOR FREE	2033	#N/A	[Not Available]	#N/A	#N/A	#N/A	#N/A	[Not Available]	Negative	#N/A	0	2033	0	2033
TCGA-BH-A0BL-01A-11R-A115-07	12.6233	1.2493	0	0	0	46.7972	0	0	3.1612	0	0	0.304	1.8237	0.6079	0	0.9119	5.7752	0	6.991	88.4515	3.0396	TCGA-BH-A0BL	BRCA	35	FEMALE	WHITE	Stage I	[Not Applicable]	Infiltrating Ductal Carcinoma	[Not Available]	2007	Pre (<6 months since LMP AND no prior bilateral ovariectomy AND not on estrogen replacement)	-12841	Alive	TUMOR FREE	2278	#N/A	[Not Available]	#N/A	#N/A	#N/A	#N/A	[Not Available]	Negative	#N/A	0	2278	0	2278
TCGA-B6-A0X1-01A-11R-A109-07	10.1753	0	0	0	0	1.4458	44.7996	0	2.8265	0	0	0	0	0	0	0.5436	0	0.5436	11.9581	5.9791	11.4146	TCGA-B6-A0X1	BRCA	48	FEMALE	WHITE	[Discrepancy]	[Not Applicable]	Infiltrating Ductal Carcinoma	[Not Available]	1994	Indeterminate (neither Pre or Postmenopausal)	-17624	Dead	TUMOR FREE	#N/A	7455	[Not Available]	Distant Metastasis	Brain	#N/A	490	[Not Available]	Negative	#N/A	1	7455	0	7455
TCGA-LL-A740-01A-21R-A32P-07	10.0807	1.1869	1.0375	0	0	127.037	1.2152	0.6782	13.3791	1.6149	0.8074	152.604	19057.5	0.4037	502.624	0	61.7683	0	0	6.0557	2.0186	TCGA-LL-A740	BRCA	61	FEMALE	BLACK OR AFRICAN AMERICAN	Stage IA	[Not Applicable]	Infiltrating Ductal Carcinoma	[Not Available]	2013	Post (prior bilateral ovariectomy OR >12 mo since LMP with no prior hysterectomy)	-22416	Alive	TUMOR FREE	441	#N/A	[Not Available]	#N/A	#N/A	#N/A	#N/A	[Not Available]	Negative	#N/A	0	441	0	441
TCGA-AO-A0JF-01A-11R-A056-07	8.9739	0	0	0	0	162.106	53.6011	5.588	8.3935	1.153	0	2.3059	240.192	43.4281	2.3059	1.153	0.3843	0	0	4.9962	1.9216	TCGA-AO-A0JF	BRCA	68	FEMALE	WHITE	Stage IIA	[Not Applicable]	Infiltrating Ductal Carcinoma	[Not Available]	2009	Post (prior bilateral ovariectomy OR >12 mo since LMP with no prior hysterectomy)	-24923	Alive	TUMOR FREE	1980	#N/A	[Not Available]	#N/A	#N/A	#N/A	#N/A	[Not Available]	Negative	#N/A	0	1980	0	1980
TCGA-A7-A6VX-01A-12R-A33J-07	7.825	1.2698	0	0	0	13.5694	7.795	0	0	0	1.287	0	0.429	3.432	0	0	0.429	0	5.148	25.7402	4.719	TCGA-A7-A6VX	BRCA	68	FEMALE	BLACK OR AFRICAN AMERICAN	Stage IIA	[Not Applicable]	Infiltrating Ductal Carcinoma	[Not Available]	2013	Post (prior bilateral ovariectomy OR >12 mo since LMP with no prior hysterectomy)	-25066	Alive	TUMOR FREE	317	#N/A	[Not Available]	#N/A	#N/A	#N/A	#N/A	[Not Available]	Negative	#N/A	0	317	0	317
TCGA-BH-A0HB-01A-11R-A056-07	7.7666	0	4.7776	0	0	327.972	263.486	19.7274	13.759	6.6954	0.4782	0.4782	0.4782	71.2578	0.9565	2287.9	0	1.4347	6.6954	10.5213	1.913	TCGA-BH-A0HB	BRCA	55	FEMALE	WHITE	Stage IA	[Not Applicable]	Infiltrating Ductal Carcinoma	[Not Available]	2008	Post (prior bilateral ovariectomy OR >12 mo since LMP with no prior hysterectomy)	-20448	Alive	TUMOR FREE	806	#N/A	[Not Available]	#N/A	#N/A	#N/A	#N/A	[Not Available]	Negative	#N/A	0	806	0	806
TCGA-C8-A1HK-01A-21R-A13Q-07	7.3368	0	0	0.9752	0	71.0928	0	0	0.6152	0	1.0003	80.5201	493.338	41.0103	177.544	972.243	7.0018	2.0005	382.596	0.5001	2.0005	TCGA-C8-A1HK	BRCA	53	FEMALE	ASIAN	Stage IIB	[Not Applicable]	Infiltrating Ductal Carcinoma	[Not Available]	2010	Peri (6-12 months since last menstrual period)	#N/A	Alive	TUMOR FREE	366	#N/A	[Not Available]	#N/A	#N/A	#N/A	#N/A	[Not Available]	Negative	#N/A	0	366	0	366
TCGA-OL-A5RX-01A-11R-A28M-07	6.7295	1.2506	0	0	0	40.3023	0	6.042	8.622	0	0	0.4141	65.8288	62.9465	4.5553	0	0	0	1.6565	43.4828	26.5038	TCGA-OL-A5RX	BRCA	51	FEMALE	BLACK OR AFRICAN AMERICAN	Stage IA	[Not Applicable]	Infiltrating Ductal Carcinoma	[Not Available]	2011	Pre (<6 months since LMP AND no prior bilateral ovariectomy AND not on estrogen replacement)	-18942	Alive	TUMOR FREE	878	#N/A	[Not Available]	#N/A	#N/A	#N/A	#N/A	[Not Available]	Negative	#N/A	0	878	0	878
TCGA-A2-A0CX-01A-21R-A00Z-07	6.4615	0	0	0	0	9.4683	1.4247	0	0	0	0	1.2108	26.5806	10.0898	2.8251	0	0	1.2108	18.5652	4.4395	4.4395	TCGA-A2-A0CX	BRCA	52	FEMALE	WHITE	Stage IIA	[Not Applicable]	Infiltrating Ductal Carcinoma	[Not Available]	2006	Pre (<6 months since LMP AND no prior bilateral ovariectomy AND not on estrogen replacement)	-19152	Alive	TUMOR FREE	1728	#N/A	[Not Available]	#N/A	#N/A	#N/A	#N/A	[Not Available]	Negative	#N/A	0	1728	0	1728
TCGA-BH-A0B8-01A-21R-A056-07	6.3916	1.7173	2.328	0	3.4897	223.965	109.54	7.5396	5.9371	151.067	0	0.4592	0	16.5301	0	20.6627	0	0	1.8367	3.6734	3.6734	TCGA-BH-A0B8	BRCA	64	FEMALE	WHITE	Stage I	[Not Applicable]	Infiltrating Ductal Carcinoma	[Not Available]	2006	Post (prior bilateral ovariectomy OR >12 mo since LMP with no prior hysterectomy)	-23380	Alive	TUMOR FREE	1569	#N/A	[Not Available]	#N/A	#N/A	#N/A	#N/A	[Not Available]	Negative	#N/A	0	1569	0	1569
TCGA-BH-A0DK-01A-21R-A056-07	6.3456	0	1.2376	0	0	223.389	127.894	15.441	11.3816	0.45	0	0.45	3.1503	259.226	0	3.6004	0.45	0	7.6508	29.703	12.6013	TCGA-BH-A0DK	BRCA	49	FEMALE	WHITE	Stage IIA	[Not Applicable]	Infiltrating Ductal Carcinoma	[Not Available]	2009	Pre (<6 months since LMP AND no prior bilateral ovariectomy AND not on estrogen replacement)	-18237	Alive	TUMOR FREE	423	#N/A	[Not Available]	#N/A	#N/A	#N/A	#N/A	[Not Available]	Negative	#N/A	0	423	0	423
TCGA-BH-A0C0-01A-21R-A056-07	5.6784	0	0	0	0	223.084	124.262	8.4833	17.2088	0	0	0.9137	10.5071	0.9137	4.5683	0	0	0	2.741	10.0503	12.7912	TCGA-BH-A0C0	BRCA	62	FEMALE	WHITE	Stage IIA	[Not Applicable]	Infiltrating Ductal Carcinoma	[Not Available]	2007	Post (prior bilateral ovariectomy OR >12 mo since LMP with no prior hysterectomy)	-23006	Alive	TUMOR FREE	1270	#N/A	[Not Available]	#N/A	#N/A	#N/A	#N/A	[Not Available]	Negative	#N/A	0	1270	0	1270
TCGA-AR-A1AQ-01A-11R-A12P-07	5.4545	0	0	0	0	103.197	9.8967	0	5.9298	0	0	0	0	0	0	0	1.0331	0	2.0661	206.612	0.5165	TCGA-AR-A1AQ	BRCA	49	FEMALE	WHITE	Stage IIA	[Not Applicable]	Infiltrating Ductal Carcinoma	[Not Available]	2007	Post (prior bilateral ovariectomy OR >12 mo since LMP with no prior hysterectomy)	-18109	Alive	TUMOR FREE	3021	#N/A	[Not Available]	#N/A	#N/A	#N/A	#N/A	[Not Available]	Negative	#N/A	0	3021	0	3021
TCGA-A8-A08J-01A-11R-A00Z-07	5.3327	0	1.0479	0	0	46.5968	39.1983	30.8916	1.018	0.6653	0.3327	185.961	4041.39	149.368	760.812	3563.87	6.6534	0.6653	228.543	21.2908	3.6593	TCGA-A8-A08J	BRCA	52	FEMALE	[Not Available]	Stage IV	[Not Applicable]	Infiltrating Ductal Carcinoma	[Not Available]	2005	Post (prior bilateral ovariectomy OR >12 mo since LMP with no prior hysterectomy)	-19266	Dead	WITH TUMOR	#N/A	1127	[Not Available]	#N/A	#N/A	#N/A	#N/A	[Not Available]	Positive	#N/A	1	1127	1	1127
TCGA-C8-A26X-01A-31R-A16F-07	4.4327	0	0	0	1.5296	102.334	41.9339	0	64.7497	1.378	0	41.8006	616.091	63.8493	225.999	0	92.3289	0.4593	7.3496	3.6748	2.2967	TCGA-C8-A26X	BRCA	58	FEMALE	ASIAN	Stage IIA	[Not Applicable]	Infiltrating Ductal Carcinoma	[Not Available]	2010	Post (prior bilateral ovariectomy OR >12 mo since LMP with no prior hysterectomy)	-21463	Alive	TUMOR FREE	376	#N/A	[Not Available]	#N/A	#N/A	#N/A	#N/A	[Not Available]	Negative	#N/A	0	376	0	376
TCGA-BH-A0HK-01A-11R-A056-07	4.1728	2.8135	0	0	2.4499	533.425	311.254	27.1918	79.6997	2.1075	0	0	0	0.5269	1.0537	1.0537	0.5269	0	1.5806	15.8061	0.5269	TCGA-BH-A0HK	BRCA	81	FEMALE	WHITE	Stage IIB	[Not Applicable]	Infiltrating Ductal Carcinoma	[Not Available]	2010	Post (prior bilateral ovariectomy OR >12 mo since LMP with no prior hysterectomy)	-29751	Alive	TUMOR FREE	178	#N/A	[Not Available]	#N/A	#N/A	#N/A	#N/A	[Not Available]	Negative	#N/A	0	178	0	178
TCGA-A2-A0CT-01A-31R-A056-07	4.0259	0	0	0	0	293.871	158.641	17.8094	8.5117	2.5084	0	0.4181	6.689	10.4515	0.8361	292.642	0	6.689	96.99	5.4348	2.5084	TCGA-A2-A0CT	BRCA	71	FEMALE	WHITE	Stage IIA	[Not Applicable]	Infiltrating Ductal Carcinoma	[Not Available]	2005	Post (prior bilateral ovariectomy OR >12 mo since LMP with no prior hysterectomy)	-25959	Alive	TUMOR FREE	2289	#N/A	[Not Available]	#N/A	#N/A	#N/A	#N/A	[Not Available]	Negative	#N/A	0	2289	0	2289
TCGA-D8-A1JM-01A-11R-A13Q-07	4.0028	0	0.6815	0	0	0	0.6876	1.3261	0.6692	0	0	0	0	0.6139	0	0	0.6139	0	3.3766	286.701	30.3891	TCGA-D8-A1JM	BRCA	59	FEMALE	WHITE	Stage IIB	[Not Applicable]	Infiltrating Ductal Carcinoma	[Not Available]	2010	Post (prior bilateral ovariectomy OR >12 mo since LMP with no prior hysterectomy)	-21602	Alive	TUMOR FREE	590	#N/A	[Not Available]	#N/A	#N/A	#N/A	#N/A	[Not Available]	Negative	#N/A	0	590	0	590
TCGA-B6-A0RI-01A-11R-A056-07	3.8762	1.435	0	0	0	73.0958	48.852	2.0026	1.019	0.3225	0	0	0.645	12.5766	0	0	0.645	0	2.2573	6.772	6.1271	TCGA-B6-A0RI	BRCA	44	FEMALE	WHITE	Stage IIIB	[Not Applicable]	Infiltrating Ductal Carcinoma	[Not Available]	1992	Indeterminate (neither Pre or Postmenopausal)	-16138	Alive	WITH TUMOR	7126	#N/A	[Not Available]	Locoregional Disease	Other, specify	Chest Wall	1100	[Not Available]	Negative	#N/A	0	7126	0	7126
TCGA-BH-A0GY-01A-11R-A056-07	3.5482	0	3.6655	0	0	302.804	131.51	9.3463	10.3517	1.8034	0.4509	0	0.4509	13.5257	0	0	4.0577	0	9.9188	11.7223	20.2885	TCGA-BH-A0GY	BRCA	67	FEMALE	WHITE	Stage IIA	[Not Applicable]	Infiltrating Ductal Carcinoma	[Not Available]	2008	Post (prior bilateral ovariectomy OR >12 mo since LMP with no prior hysterectomy)	-24493	Alive	TUMOR FREE	923	#N/A	[Not Available]	#N/A	#N/A	#N/A	#N/A	[Not Available]	Negative	#N/A	0	923	0	923
TCGA-AN-A0AM-01A-11R-A034-07	3.0719	0	0	0	0	195.56	39.8155	0.9554	3.9749	0	0.3487	1.7434	1.3947	9.4143	0	0	0	0	32.0784	38.7033	8.717	TCGA-AN-A0AM	BRCA	56	FEMALE	WHITE	Stage IIA	[Not Applicable]	Infiltrating Ductal Carcinoma	[Not Available]	2010	Post (prior bilateral ovariectomy OR >12 mo since LMP with no prior hysterectomy)	-20713	Alive	TUMOR FREE	5	#N/A	[Not Available]	#N/A	#N/A	#N/A	#N/A	[Not Available]	Negative	#N/A	0	5	0	5
TCGA-BH-A0B9-01A-11R-A056-07	2.5952	0	0	0	0	0	0	0.9875	0	0	0	0.2239	0	0.2239	0.4478	0.6717	48.3654	0	28.4371	337.214	78.3699	TCGA-BH-A0B9	BRCA	44	FEMALE	WHITE	Stage IA	[Not Applicable]	Infiltrating Ductal Carcinoma	[Not Available]	2006	Pre (<6 months since LMP AND no prior bilateral ovariectomy AND not on estrogen replacement)	-16310	Alive	TUMOR FREE	1572	#N/A	[Not Available]	#N/A	#N/A	#N/A	#N/A	[Not Available]	Negative	#N/A	0	1572	0	1572
TCGA-A2-A0ST-01A-12R-A084-07	2.5666	0	0	0	0	0	0	0	0	0	0	0	39.3541	6.4164	0.4278	0	58.1756	0.4278	11.1218	162.549	3.8499	TCGA-A2-A0ST	BRCA	62	FEMALE	WHITE	Stage IIA	[Not Applicable]	Infiltrating Ductal Carcinoma	[Not Available]	2003	Post (prior bilateral ovariectomy OR >12 mo since LMP with no prior hysterectomy)	-22922	Alive	WITH TUMOR	3017	#N/A	[Not Available]	#N/A	#N/A	#N/A	#N/A	[Not Available]	Negative	#N/A	0	3017	0	3017
TCGA-LL-A5YM-01A-11R-A28M-07	2.2621	0	0	0	0	0	6.3992	0	0	0	0	0	32.0978	51.9679	1.5285	4.0759	0	0	4.5854	0	1.5285	TCGA-LL-A5YM	BRCA	88	FEMALE	BLACK OR AFRICAN AMERICAN	Stage IIIB	[Not Applicable]	Infiltrating Ductal Carcinoma	[Not Available]	2012	Post (prior bilateral ovariectomy OR >12 mo since LMP with no prior hysterectomy)	-32478	Alive	WITH TUMOR	466	#N/A	[Not Available]	Locoregional Recurrence	Other, specify	Skin left chest wall	258	[Not Available]	Negative	#N/A	0	466	0	466
TCGA-BH-A0HX-01A-21R-A056-07	2.2038	0	1.1362	0	0	200.625	187.483	17.4893	28.005	2.2877	0	0.7626	41.1515	24.7831	3.0502	1.9064	0	2.669	0.7626	8.0069	3.8128	TCGA-BH-A0HX	BRCA	54	FEMALE	WHITE	Stage IIB	[Not Applicable]	Infiltrating Ductal Carcinoma	[Not Available]	2008	Post (prior bilateral ovariectomy OR >12 mo since LMP with no prior hysterectomy)	-19900	Alive	TUMOR FREE	829	#N/A	[Not Available]	#N/A	#N/A	#N/A	#N/A	[Not Available]	Negative	#N/A	0	829	0	829
TCGA-E2-A1AZ-01A-11R-A12P-07	2.198	0	0	0	0	1.5904	0	0	2.2131	0	0	0	0	0.7502	0	0	3.7509	0.7502	114.779	118.53	2.2506	TCGA-E2-A1AZ	BRCA	63	FEMALE	WHITE	Stage IIB	[Not Applicable]	Infiltrating Ductal Carcinoma	[Not Available]	2004	Post (prior bilateral ovariectomy OR >12 mo since LMP with no prior hysterectomy)	-23230	Alive	TUMOR FREE	2329	#N/A	[Not Available]	#N/A	#N/A	#N/A	#N/A	[Not Available]	Negative	#N/A	0	2329	0	2329
TCGA-B6-A0RG-01A-11R-A056-07	2.1799	0	0.8232	0	0	286.521	202.306	20.2393	6.2349	3.557	0	0	0	28.9641	0	1.0163	0	0	1.0163	9.1466	13.7198	TCGA-B6-A0RG	BRCA	26	FEMALE	WHITE	Stage IIB	[Not Applicable]	Infiltrating Ductal Carcinoma	[Not Available]	1991	Indeterminate (neither Pre or Postmenopausal)	-9840	Alive	TUMOR FREE	2082	#N/A	[Not Available]	#N/A	#N/A	#N/A	#N/A	[Not Available]	Negative	#N/A	0	2082	0	2082
TCGA-A1-A0SP-01A-11R-A084-07	2.1197	1.0835	0	0	0	4.3962	2.2291	0	6.5888	0	0	0	1.4593	0	0	0.3648	0	0	29.1864	706.312	9.1208	TCGA-A1-A0SP	BRCA	40	FEMALE	[Not Available]	Stage IIA	[Not Applicable]	Infiltrating Ductal Carcinoma	[Not Available]	2007	[Not Available]	-14954	Alive	TUMOR FREE	584	#N/A	[Not Available]	#N/A	#N/A	#N/A	#N/A	[Not Available]	Negative	#N/A	0	584	0	584
TCGA-LL-A5YN-01A-11R-A28M-07	2.0899	0	0	0	0	0	3.1348	0	0	0	0	17.7638	1371.7	68.9655	29.7806	4.1797	1.5674	8.8819	39.185	2.0899	49.1118	TCGA-LL-A5YN	BRCA	46	FEMALE	BLACK OR AFRICAN AMERICAN	Stage IIA	[Not Applicable]	Infiltrating Ductal Carcinoma	[Not Available]	2013	Post (prior bilateral ovariectomy OR >12 mo since LMP with no prior hysterectomy)	-16884	Alive	TUMOR FREE	447	#N/A	[Not Available]	#N/A	#N/A	#N/A	#N/A	[Not Available]	Negative	#N/A	0	447	0	447
TCGA-D8-A1JA-01A-11R-A13Q-07	1.896	0	0	0	0	0	0	0	0	0	0.2709	4.0628	9.7454	8.6674	0.8126	0	2.7086	0	3.2503	11.9177	2.7086	TCGA-D8-A1JA	BRCA	60	FEMALE	WHITE	[Not Available]	[Not Applicable]	Infiltrating Ductal Carcinoma	[Not Available]	2010	Post (prior bilateral ovariectomy OR >12 mo since LMP with no prior hysterectomy)	-21918	Alive	WITH TUMOR	502	#N/A	[Not Available]	Locoregional Disease	#N/A	#N/A	431	[Not Available]	Negative	#N/A	0	502	0	502
TCGA-E9-A1N8-01A-11R-A144-07	1.8788	0	0	0	0	0	0	0	0	0	0	0	1.4091	0	0	0	4.2273	0	2.3485	657.116	14.0911	TCGA-E9-A1N8	BRCA	48	FEMALE	WHITE	Stage IIA	[Not Applicable]	Infiltrating Ductal Carcinoma	[Not Available]	2010	Post (prior bilateral ovariectomy OR >12 mo since LMP with no prior hysterectomy)	-17652	Alive	TUMOR FREE	1039	#N/A	[Not Available]	#N/A	#N/A	#N/A	#N/A	[Not Available]	Negative	#N/A	0	1039	0	1039
TCGA-A2-A0EU-01A-22R-A056-07	1.8158	1.8595	3.0992	0	1.188	316.36	199.484	22.7314	21.2493	2.384	0.3973	0.3973	1.9867	6.3573	0	3.1787	0	4.3707	16.6879	6.3573	1.9867	TCGA-A2-A0EU	BRCA	79	FEMALE	WHITE	Stage IA	[Not Applicable]	Infiltrating Ductal Carcinoma	[Not Available]	2008	Post (prior bilateral ovariectomy OR >12 mo since LMP with no prior hysterectomy)	-29144	Alive	TUMOR FREE	1043	#N/A	[Not Available]	#N/A	#N/A	#N/A	#N/A	[Not Available]	Negative	#N/A	0	1043	0	1043
TCGA-BH-A0HW-01A-11R-A034-07	1.6589	0	0	0	0	10.6777	0	0	3.0953	1.1871	0.2968	0.2968	24.608	68.2566	6.8257	4024.47	0	0.2968	155.21	6.2321	10.9804	TCGA-BH-A0HW	BRCA	62	FEMALE	ASIAN	Stage IA	[Not Applicable]	Infiltrating Ductal Carcinoma	[Not Available]	2006	Post (prior bilateral ovariectomy OR >12 mo since LMP with no prior hysterectomy)	-22962	Alive	TUMOR FREE	1561	#N/A	[Not Available]	#N/A	#N/A	#N/A	#N/A	[Not Available]	Negative	#N/A	0	1561	0	1561
TCGA-BH-A0B1-01A-12R-A056-07	1.5648	0	2.0306	0	0	178.987	106.714	3.2526	12.5931	0	0	0.3726	3.3532	26.8256	0	2.608	0.3726	0	4.0984	7.4516	1.8629	TCGA-BH-A0B1	BRCA	66	FEMALE	WHITE	Stage IIB	[Not Applicable]	Infiltrating Ductal Carcinoma	[Not Available]	2007	Post (prior bilateral ovariectomy OR >12 mo since LMP with no prior hysterectomy)	-24315	Alive	TUMOR FREE	1148	#N/A	[Not Available]	#N/A	#N/A	#N/A	#N/A	[Not Available]	Negative	#N/A	0	1148	0	1148
TCGA-C8-A12P-01A-11R-A115-07	1.5208	0	0	0	0	2.3003	0	0	0	0	0	2.6748	22.5449	2.6748	34.3905	2.6748	83.3015	2.2927	37.4475	0.7642	2.2927	TCGA-C8-A12P	BRCA	55	FEMALE	ASIAN	Stage IIB	[Not Applicable]	Infiltrating Ductal Carcinoma	[Not Available]	2010	Post (prior bilateral ovariectomy OR >12 mo since LMP with no prior hysterectomy)	-20332	Alive	TUMOR FREE	358	#N/A	[Not Available]	#N/A	#N/A	#N/A	#N/A	[Not Available]	Negative	#N/A	0	358	0	358
TCGA-AO-A0JE-01A-11R-A056-07	1.4929	0	1.9229	0	0	162.917	64.7262	6.4706	11.1481	1.6227	0	26.3692	1066.6	638.945	7.3022	1.217	4.0568	0	6.8966	4.0568	9.3306	TCGA-AO-A0JE	BRCA	53	FEMALE	BLACK OR AFRICAN AMERICAN	Stage IIIA	[Not Applicable]	Infiltrating Ductal Carcinoma	[Not Available]	2005	Post (prior bilateral ovariectomy OR >12 mo since LMP with no prior hysterectomy)	-19516	Alive	TUMOR FREE	2335	#N/A	[Not Available]	#N/A	#N/A	#N/A	#N/A	[Not Available]	Positive	#N/A	0	2335	0	2335
TCGA-EW-A1P5-01A-11R-A144-07	1.4467	1.4733	0	0.9327	0	171.866	0	0	14.2457	0.3807	0	5.7105	1035.85	14.0858	6.8526	63.5767	0.7614	0	80.7081	1.9035	2.6649	TCGA-EW-A1P5	BRCA	77	FEMALE	WHITE	Stage IIB	[Not Applicable]	Infiltrating Ductal Carcinoma	[Not Available]	2010	Post (prior bilateral ovariectomy OR >12 mo since LMP with no prior hysterectomy)	-28177	Alive	TUMOR FREE	703	#N/A	[Not Available]	#N/A	#N/A	#N/A	#N/A	[Not Available]	Negative	#N/A	0	703	0	703
TCGA-AC-A6IW-01A-12R-A33J-07	1.4374	0	0	0	0.7347	0	0	0.7155	0	0	1.2834	0	0	0.6417	0	0.6417	0	0	5.7752	264.057	13.7964	TCGA-AC-A6IW	BRCA	73	FEMALE	BLACK OR AFRICAN AMERICAN	Stage IIA	[Not Applicable]	Infiltrating Ductal Carcinoma	[Not Available]	2013	Post (prior bilateral ovariectomy OR >12 mo since LMP with no prior hysterectomy)	-26896	Alive	TUMOR FREE	413	#N/A	[Not Available]	#N/A	#N/A	#N/A	#N/A	[Not Available]	Negative	#N/A	0	413	0	413
TCGA-A8-A097-01A-11R-A034-07	1.4264	0	0	0	0	0	0	0	0.4755	4.8905	0	0	1.3585	2.1735	0	0.2717	0.8151	0	4.8905	23.6374	6.249	TCGA-A8-A097	BRCA	65	FEMALE	[Not Available]	Stage IIB	[Not Applicable]	Infiltrating Ductal Carcinoma	[Not Available]	2009	Post (prior bilateral ovariectomy OR >12 mo since LMP with no prior hysterectomy)	-23741	Alive	TUMOR FREE	365	#N/A	[Not Available]	#N/A	#N/A	#N/A	#N/A	[Not Available]	Negative	#N/A	0	365	0	365
TCGA-A2-A4S3-01A-21R-A266-07	1.4147	0	0	0	0	3.9645	0	0	0	0	0	27.972	214.034	310.382	12.3722	1016.68	18.2894	0	207.638	116.729	16.6756	TCGA-A2-A4S3	BRCA	59	FEMALE	BLACK OR AFRICAN AMERICAN	Stage IIB	[Not Applicable]	Infiltrating Ductal Carcinoma	[Not Available]	2012	Post (prior bilateral ovariectomy OR >12 mo since LMP with no prior hysterectomy)	-21762	Alive	TUMOR FREE	666	#N/A	[Not Available]	#N/A	#N/A	#N/A	#N/A	[Not Available]	Negative	#N/A	0	666	0	666
TCGA-B6-A0IQ-01A-11R-A034-07	1.3558	0	0	0	0	0	1.0318	0	3.6113	0.8998	0	0	0.8998	0	0	0	1.7997	0	9.8982	240.256	105.581	TCGA-B6-A0IQ	BRCA	40	FEMALE	WHITE	Stage IIIA	[Not Applicable]	Infiltrating Ductal Carcinoma	[Not Available]	1996	Indeterminate (neither Pre or Postmenopausal)	-14669	Alive	TUMOR FREE	4285	#N/A	[Not Available]	#N/A	#N/A	#N/A	#N/A	[Not Available]	Negative	#N/A	0	4285	0	4285
TCGA-LL-A441-01A-11R-A24H-07	1.2344	0	0	0	0	4.7485	0	0	0	0	0	0	0.9447	5.9828	0	0.3149	4.4084	0	4.0935	461.623	31.4886	TCGA-LL-A441	BRCA	62	FEMALE	BLACK OR AFRICAN AMERICAN	Stage IA	[Not Applicable]	Infiltrating Ductal Carcinoma	[Not Available]	2012	Post (prior bilateral ovariectomy OR >12 mo since LMP with no prior hysterectomy)	-22772	Alive	TUMOR FREE	996	#N/A	[Not Available]	#N/A	#N/A	#N/A	#N/A	[Not Available]	Negative	#N/A	0	996	0	996
TCGA-A2-A0SX-01A-12R-A084-07	1.1882	0	0	0	0	44.7238	0	0	0.973	0	0	0	11.1946	0.9634	1.9268	0	17.6622	0	6.7437	369.3	2.569	TCGA-A2-A0SX	BRCA	48	FEMALE	WHITE	Stage IA	[Not Applicable]	Infiltrating Ductal Carcinoma	[Not Available]	2007	Pre (<6 months since LMP AND no prior bilateral ovariectomy AND not on estrogen replacement)	-17774	Alive	WITH TUMOR	1534	#N/A	[Not Available]	#N/A	#N/A	#N/A	1239	[Not Available]	Negative	#N/A	0	1534	0	1534
TCGA-BH-A0E2-01A-11R-A056-07	1.1774	0	1.2206	0	0	214.219	94.6036	5.8006	5.5848	1.1774	0	0	1.9623	57.6923	0	0.3925	0	0	5.887	5.102	5.887	TCGA-BH-A0E2	BRCA	49	FEMALE	BLACK OR AFRICAN AMERICAN	Stage IIIA	[Not Applicable]	Infiltrating Ductal Carcinoma	[Not Available]	2009	Pre (<6 months since LMP AND no prior bilateral ovariectomy AND not on estrogen replacement)	-18152	Alive	TUMOR FREE	435	#N/A	[Not Available]	#N/A	#N/A	#N/A	#N/A	[Not Available]	Negative	#N/A	0	435	0	435
TCGA-A2-A3XW-01A-11R-A239-07	1.1623	0	0	0	0	118.363	15.8469	0	26.2155	1.4174	0	0	0	0.3544	0	0	0.3544	0	15.2374	0.3544	6.3785	TCGA-A2-A3XW	BRCA	42	FEMALE	BLACK OR AFRICAN AMERICAN	Stage IIB	[Not Applicable]	Infiltrating Ductal Carcinoma	[Not Available]	2009	Pre (<6 months since LMP AND no prior bilateral ovariectomy AND not on estrogen replacement)	-15670	Alive	TUMOR FREE	1712	#N/A	[Not Available]	#N/A	#N/A	#N/A	#N/A	[Not Available]	Negative	#N/A	0	1712	0	1712
TCGA-EW-A3U0-01A-11R-A22K-07	1.1387	3.4647	0	0	0	30.0997	0	0.6178	4.248	0.4038	0	0	0	3.2305	0	0.4038	1.6152	0	6.8647	225.728	25.036	TCGA-EW-A3U0	BRCA	61	FEMALE	BLACK OR AFRICAN AMERICAN	Stage IIIA	[Not Applicable]	Infiltrating Ductal Carcinoma	[Not Available]	2011	Post (prior bilateral ovariectomy OR >12 mo since LMP with no prior hysterectomy)	-22520	Alive	TUMOR FREE	532	#N/A	[Not Available]	#N/A	#N/A	#N/A	#N/A	[Not Available]	Negative	#N/A	0	532	0	532
TCGA-E2-A1IU-01A-11R-A14D-07	1.1346	0	0	0	0	1.7431	0	0	0	0	0.8222	27.9548	7218.01	445.632	69.0647	57.554	0.4111	0	1.2333	21.7883	2.0555	TCGA-E2-A1IU	BRCA	60	FEMALE	WHITE	Stage IA	[Not Applicable]	Infiltrating Ductal Carcinoma	[Not Available]	2010	Post (prior bilateral ovariectomy OR >12 mo since LMP with no prior hysterectomy)	-22279	Alive	TUMOR FREE	337	#N/A	[Not Available]	#N/A	#N/A	#N/A	#N/A	[Not Available]	Negative	#N/A	0	337	0	337
TCGA-A2-A0YT-01A-11R-A109-07	1.1004	0	0	0	0	1.0572	0	0	0	0.2697	0	0.2697	2.1576	5.1244	0	11.867	0.5394	1.3485	1.8879	1.3485	13.755	TCGA-A2-A0YT	BRCA	56	FEMALE	WHITE	Stage IIIB	[Not Applicable]	Infiltrating Ductal Carcinoma	[Not Available]	2008	Post (prior bilateral ovariectomy OR >12 mo since LMP with no prior hysterectomy)	-20482	Dead	TUMOR FREE	#N/A	723	[Not Available]	#N/A	#N/A	#N/A	#N/A	[Not Available]	Negative	#N/A	1	723	0	723
TCGA-AN-A0XU-01A-11R-A109-07	1.0441	0	0	0.4755	0	3.6492	0	0	0	0	0	0	0	0	0	0	6.8918	0	70.2963	443.143	24.4659	TCGA-AN-A0XU	BRCA	54	FEMALE	WHITE	Stage IIA	[Not Applicable]	Infiltrating Ductal Carcinoma	[Not Available]	2010	Post (prior bilateral ovariectomy OR >12 mo since LMP with no prior hysterectomy)	-20052	Alive	TUMOR FREE	10	#N/A	[Not Available]	#N/A	#N/A	#N/A	#N/A	[Not Available]	Negative	#N/A	0	10	0	10
TCGA-BH-A1F8-01A-11R-A13Q-07	0.9896	0	0	0	0	21.8519	0.8854	0	0	0	0.5787	0	0	4.0509	0	0.2894	11.8634	0	0	19.6759	1.1574	TCGA-BH-A1F8	BRCA	90	FEMALE	WHITE	Stage IIIB	[Not Applicable]	Infiltrating Ductal Carcinoma	[Not Available]	1999	Post (prior bilateral ovariectomy OR >12 mo since LMP with no prior hysterectomy)	-32871	Dead	WITH TUMOR	#N/A	763	[Not Available]	#N/A	#N/A	#N/A	#N/A	[Not Available]	[Not Available]	#N/A	1	763	1	763
TCGA-E2-A10E-01A-21R-A10J-07	0.9771	0	0	0	0	1.7977	0	0	0.9834	0	0	139.994	25294.5	351.707	85.8127	14.4065	2.1923	0.3132	2.8187	5.9505	6.8901	TCGA-E2-A10E	BRCA	64	FEMALE	WHITE	Stage IIA	[Not Applicable]	Infiltrating Ductal Carcinoma	[Not Available]	2008	Post (prior bilateral ovariectomy OR >12 mo since LMP with no prior hysterectomy)	-23684	Alive	TUMOR FREE	865	#N/A	[Not Available]	#N/A	#N/A	#N/A	#N/A	[Not Available]	Negative	#N/A	0	865	0	865
TCGA-A7-A6VY-01A-12R-A33J-07	0.9685	0	0	0	0	32.238	0	0	0	0	2.4213	0.6918	0	1.3836	0	0.3459	45.6589	0	9.6852	344.172	28.7098	TCGA-A7-A6VY	BRCA	48	FEMALE	BLACK OR AFRICAN AMERICAN	Stage IIB	[Not Applicable]	Infiltrating Ductal Carcinoma	[Not Available]	2013	Post (prior bilateral ovariectomy OR >12 mo since LMP with no prior hysterectomy)	-17640	Alive	TUMOR FREE	266	#N/A	[Not Available]	#N/A	#N/A	#N/A	#N/A	[Not Available]	Negative	#N/A	0	266	0	266
TCGA-B6-A0X5-01A-21R-A109-07	0.9348	0	0	0	0	0	0	0	0	3.7392	0.9348	0.4674	12.5684	3.2718	5.6088	0.4674	0.9348	0	1.4022	1.4022	2.8044	TCGA-B6-A0X5	BRCA	61	FEMALE	BLACK OR AFRICAN AMERICAN	Stage IIB	[Not Applicable]	Infiltrating Ductal Carcinoma	[Not Available]	1995	Post (prior bilateral ovariectomy OR >12 mo since LMP with no prior hysterectomy)	-22380	Dead	WITH TUMOR	#N/A	2097	[Not Available]	Distant Metastasis	Other, specify	Liver and Pleura and Bone	1343	[Not Available]	Negative	#N/A	1	2097	1	2097
TCGA-BH-A1EX-01A-11R-A13Q-07	0.8948	0.9137	0	0	0	178.089	0	0	0	0	0	1.6526	6.9787	115.446	1.8887	0	21.4838	0	1.1804	4.7217	4.4856	TCGA-BH-A1EX	BRCA	67	FEMALE	WHITE	Stage IIB	[Not Applicable]	Infiltrating Ductal Carcinoma	[Not Available]	2000	Post (prior bilateral ovariectomy OR >12 mo since LMP with no prior hysterectomy)	-24544	Dead	WITH TUMOR	#N/A	1508	[Not Available]	#N/A	#N/A	#N/A	#N/A	[Not Available]	[Not Available]	#N/A	1	1508	1	1508
TCGA-PL-A8LX-01A-11R-A41B-07	0.8902	0	0	0	0	0	0	0	0	0	0	0	0.4451	0	0	0.4451	0	0	0.8902	0	10.237	TCGA-PL-A8LX	BRCA	35	FEMALE	BLACK OR AFRICAN AMERICAN	Stage IV	[Not Applicable]	Infiltrating Ductal Carcinoma	[Not Available]	2013	Pre (<6 months since LMP AND no prior bilateral ovariectomy AND not on estrogen replacement)	-12840	Alive	WITH TUMOR	5	#N/A	[Not Available]	#N/A	#N/A	#N/A	#N/A	[Not Available]	[Not Available]	#N/A	0	5	0	5
TCGA-AQ-A04J-01A-02R-A034-07	0.8823	0	0	0	0	0.7045	0	0	0	0	0	0	0.3174	8.2513	0	0	42.2088	1.2694	51.4123	443.986	12.377	TCGA-AQ-A04J	BRCA	45	FEMALE	WHITE	Stage IIA	[Not Applicable]	Infiltrating Ductal Carcinoma	[Not Available]	2009	Pre (<6 months since LMP AND no prior bilateral ovariectomy AND not on estrogen replacement)	-16615	Alive	TUMOR FREE	819	#N/A	[Not Available]	#N/A	#N/A	#N/A	#N/A	[Not Available]	Negative	#N/A	0	819	0	819
TCGA-E2-A15J-01A-11R-A12P-07	0.788	0	0	0	0	0	3.8127	0	2.1131	0	0	2.1201	306.728	122.968	6.7138	20.4947	0	0	0.3534	5.3004	13.4276	TCGA-E2-A15J	BRCA	51	FEMALE	WHITE	Stage I	[Not Applicable]	Infiltrating Ductal Carcinoma	[Not Available]	2009	Pre (<6 months since LMP AND no prior bilateral ovariectomy AND not on estrogen replacement)	-18771	Alive	TUMOR FREE	1640	#N/A	[Not Available]	#N/A	#N/A	#N/A	#N/A	[Not Available]	Negative	#N/A	0	1640	0	1640
TCGA-BH-A0BW-01A-11R-A115-07	0.7553	0	0	5.8032	0.4422	0	0	0	0	5.1584	0.3685	0	0	0.7369	0	0.3685	12.1592	0	15.4753	696.021	9.9484	TCGA-BH-A0BW	BRCA	71	FEMALE	BLACK OR AFRICAN AMERICAN	Stage I	[Not Applicable]	Infiltrating Ductal Carcinoma	[Not Available]	2006	Post (prior bilateral ovariectomy OR >12 mo since LMP with no prior hysterectomy)	-25974	Alive	TUMOR FREE	2371	#N/A	[Not Available]	#N/A	#N/A	#N/A	#N/A	[Not Available]	Negative	#N/A	0	2371	0	2371
TCGA-E9-A226-01A-21R-A157-07	0.6487	0	0	0	0	0	0	0	0	0	0	26.9218	2531.64	983.458	4.2167	55.4655	0	3.2436	2.2705	13.6231	0.6487	TCGA-E9-A226	BRCA	45	FEMALE	WHITE	Stage IIIA	[Not Applicable]	Infiltrating Ductal Carcinoma	[Not Available]	2011	Pre (<6 months since LMP AND no prior bilateral ovariectomy AND not on estrogen replacement)	-16511	Dead	WITH TUMOR	#N/A	1048	[Not Available]	Distant Metastasis	Bone	#N/A	790	[Not Available]	Negative	#N/A	1	1048	1	1048
TCGA-E2-A1B1-01A-21R-A12P-07	0.543	0	0	0	0	0.5093	0	0	0	0	0	3.7883	554.427	13.8904	4.2092	1.0523	3.7883	0	107.755	33.0422	2.9464	TCGA-E2-A1B1	BRCA	45	FEMALE	WHITE	Stage IIB	[Not Applicable]	Infiltrating Ductal Carcinoma	[Not Available]	2007	Post (prior bilateral ovariectomy OR >12 mo since LMP with no prior hysterectomy)	-16603	Alive	TUMOR FREE	2653	#N/A	[Not Available]	#N/A	#N/A	#N/A	#N/A	[Not Available]	Negative	#N/A	0	2653	0	2653
TCGA-A8-A06Z-01A-11R-A00Z-07	0.5066	0	0	0	0	0	0	0	0	0	0	0.2533	53.9219	11.1456	4.5596	7.8526	0	0.2533	0.5066	0.2533	4.8129	TCGA-A8-A06Z	BRCA	84	FEMALE	[Not Available]	Stage IIB	[Not Applicable]	Infiltrating Ductal Carcinoma	[Not Available]	2007	Post (prior bilateral ovariectomy OR >12 mo since LMP with no prior hysterectomy)	-30984	Alive	#N/A	31	#N/A	[Not Available]	#N/A	#N/A	#N/A	#N/A	[Not Available]	[Not Available]	#N/A	0	31	0	31
TCGA-A2-A1G1-01A-21R-A13Q-07	0.4701	0	0	0	0	0.9044	0	0	0	0	0	0	0	0.2749	0	0.5498	4.3983	0	0.5498	152.017	12.9201	TCGA-A2-A1G1	BRCA	85	FEMALE	WHITE	Stage IIB	[Not Applicable]	Infiltrating Ductal Carcinoma	[Not Available]	2010	Post (prior bilateral ovariectomy OR >12 mo since LMP with no prior hysterectomy)	-31223	Alive	TUMOR FREE	584	#N/A	[Not Available]	#N/A	#N/A	#N/A	#N/A	[Not Available]	Negative	#N/A	0	584	0	584
TCGA-E9-A1RG-01A-11R-A14D-07	0.4621	0	0	0	0	0	0	0	0	0.9242	0	0	3.2348	2.3105	0	0.9242	0	0	0	0	9.2421	TCGA-E9-A1RG	BRCA	62	FEMALE	WHITE	Stage IIIA	[Not Applicable]	Infiltrating Ductal Carcinoma	[Not Available]	2011	Post (prior bilateral ovariectomy OR >12 mo since LMP with no prior hysterectomy)	-22788	Alive	TUMOR FREE	647	#N/A	[Not Available]	#N/A	#N/A	#N/A	#N/A	[Not Available]	Negative	#N/A	0	647	0	647
TCGA-D8-A1XY-01A-11R-A14M-07	0.3305	0	0	0	0	0	0	0	0	0	0	0	7.2439	2.9742	0.3305	2.6438	0	0	0.9914	5.9484	1.9828	TCGA-D8-A1XY	BRCA	74	FEMALE	WHITE	Stage IIA	[Not Applicable]	Infiltrating Ductal Carcinoma	[Not Available]	2010	Post (prior bilateral ovariectomy OR >12 mo since LMP with no prior hysterectomy)	-27106	Alive	TUMOR FREE	503	#N/A	[Not Available]	#N/A	#N/A	#N/A	#N/A	[Not Available]	[Not Available]	#N/A	0	503	0	503
TCGA-B6-A0I9-01A-11R-A034-07	0.3187	0	0	0	0	0	0	0	0	0	0	0.3187	12.1001	12.4283	0	0	0.3187	0.3187	0.956	6.0548	3.5054	TCGA-B6-A0I9	BRCA	62	FEMALE	WHITE	Stage IV	[Not Applicable]	Infiltrating Ductal Carcinoma	[Not Available]	1992	Indeterminate (neither Pre or Postmenopausal)	-22798	Dead	WITH TUMOR	#N/A	362	[Not Available]	#N/A	#N/A	#N/A	#N/A	[Not Available]	[Not Available]	#N/A	1	362	1	362
TCGA-S3-A6ZH-01A-22R-A32P-07	0.3149	0	0	0	0	0	0	0	0	0	0	0	2.5195	6.6137	0	2.5195	0.9448	0	3.7792	3.7792	2.2046	TCGA-S3-A6ZH	BRCA	29	FEMALE	BLACK OR AFRICAN AMERICAN	Stage IIIC	[Not Applicable]	Infiltrating Ductal Carcinoma	[Not Available]	2013	[Unknown]	-10832	Alive	TUMOR FREE	641	#N/A	[Not Available]	#N/A	#N/A	#N/A	#N/A	[Not Available]	Negative	#N/A	0	641	0	641
TCGA-E9-A243-01A-21R-A169-07	0.2334	0	0	0	0	0	0	0	0.4667	1.4002	0	0	1.4002	4.2007	0.4667	25.6709	3.0338	0	8.168	465.811	1.4002	TCGA-E9-A243	BRCA	52	FEMALE	WHITE	Stage IIA	[Not Applicable]	Infiltrating Ductal Carcinoma	[Not Available]	2011	Peri (6-12 months since last menstrual period)	-19035	Alive	WITH TUMOR	612	#N/A	[Not Available]	Distant Metastasis	Bone	#N/A	305	[Not Available]	Negative	#N/A	0	612	0	612
TCGA-BH-A203-01A-12R-A169-07	0	217.164	40.5091	14.5295	4.0509	13889.8	0	0	1284.7	0.3585	0	0.717	0.8962	0	3.5849	0.3585	0.3585	0	1.0755	6.0943	4.3018	TCGA-BH-A203	BRCA	78	FEMALE	WHITE	Stage IIB	[Not Applicable]	Infiltrating Ductal Carcinoma	[Not Available]	1996	Post (prior bilateral ovariectomy OR >12 mo since LMP with no prior hysterectomy)	-28609	Dead	WITH TUMOR	#N/A	1174	[Not Available]	#N/A	#N/A	#N/A	#N/A	[Not Available]	[Not Available]	#N/A	1	1174	1	1174
TCGA-E2-A14P-01A-31R-A12D-07	0	60.5366	97.0565	0.7649	2.3468	7063.05	0	0	914.009	0	0	24.4293	2303.05	20.825	238.286	1.6019	0.801	0	6.0072	390.469	2.4029	TCGA-E2-A14P	BRCA	79	FEMALE	WHITE	Stage IIIC	[Not Applicable]	Infiltrating Ductal Carcinoma	[Not Available]	2008	Post (prior bilateral ovariectomy OR >12 mo since LMP with no prior hysterectomy)	-28923	Alive	TUMOR FREE	1246	#N/A	[Not Available]	#N/A	#N/A	#N/A	#N/A	[Not Available]	Negative	#N/A	0	1246	0	1246
TCGA-D8-A1JF-01A-11R-A13Q-07	0	84.9656	15.6852	0.9334	2.377	6481.66	0.4783	0.4609	253.352	0	0.2899	137.111	9248.43	4.638	12006.4	0.5798	125.227	0	2.6089	3.7684	2.0291	TCGA-D8-A1JF	BRCA	79	FEMALE	WHITE	Stage IIIA	[Not Applicable]	Infiltrating Ductal Carcinoma	[Not Available]	2010	Post (prior bilateral ovariectomy OR >12 mo since LMP with no prior hysterectomy)	-29199	Alive	TUMOR FREE	366	#N/A	[Not Available]	#N/A	#N/A	#N/A	#N/A	[Not Available]	Negative	#N/A	0	366	0	366
TCGA-D8-A1XT-01A-11R-A14M-07	0	25.6631	5.5903	0	2.0954	3795.29	7540.03	60.9696	389.132	0	0	29.367	4849.44	97.0964	1232.89	0	2.3811	0	4.7622	2.1165	0.2646	TCGA-D8-A1XT	BRCA	61	FEMALE	WHITE	Stage IIA	[Not Applicable]	Infiltrating Ductal Carcinoma	[Not Available]	2010	Post (prior bilateral ovariectomy OR >12 mo since LMP with no prior hysterectomy)	-22448	Alive	TUMOR FREE	506	#N/A	[Not Available]	#N/A	#N/A	#N/A	#N/A	[Not Available]	Negative	#N/A	0	506	0	506
TCGA-A2-A3XU-01A-12R-A22U-07	0	0	0	0	0	3748.61	0	255.651	251.771	0	0	0	3.1741	0	3.5708	0	0	0.3968	0	143.23	12.2995	TCGA-A2-A3XU	BRCA	35	FEMALE	BLACK OR AFRICAN AMERICAN	Stage IIB	[Not Applicable]	Infiltrating Ductal Carcinoma	[Not Available]	2006	Post (prior bilateral ovariectomy OR >12 mo since LMP with no prior hysterectomy)	-13046	Dead	WITH TUMOR	#N/A	912	[Not Available]	Distant Metastasis	Bone	#N/A	574	[Not Available]	Negative	#N/A	1	912	1	912
TCGA-GM-A2DH-01A-11R-A180-07	0	7.6349	3.2647	0.4016	0	1167.14	0	0	57.8096	2.086	0	0.2608	1.8253	31.2907	0.2608	0.2608	2.086	1.3038	215.906	78.7484	16.9492	TCGA-GM-A2DH	BRCA	58	FEMALE	WHITE	Stage I	[Not Applicable]	Infiltrating Ductal Carcinoma	[Not Available]	2007	Post (prior bilateral ovariectomy OR >12 mo since LMP with no prior hysterectomy)	-21344	Alive	TUMOR FREE	2193	#N/A	[Not Available]	#N/A	#N/A	#N/A	#N/A	[Not Available]	Negative	#N/A	0	2193	0	2193
TCGA-LL-A73Z-01A-11R-A32P-07	0	0	0	0	0	602.842	3.2323	0	5.0321	0	5.5096	5.0505	642.622	124.426	479.339	0	39.9449	5.5096	39.4858	35.8127	12.8558	TCGA-LL-A73Z	BRCA	55	FEMALE	BLACK OR AFRICAN AMERICAN	Stage IV	[Not Applicable]	Infiltrating Ductal Carcinoma	[Not Available]	2013	Post (prior bilateral ovariectomy OR >12 mo since LMP with no prior hysterectomy)	-20118	Dead	WITH TUMOR	#N/A	227	[Not Available]	Distant Metastasis	Brain	#N/A	192	[Not Available]	Positive	#N/A	1	227	1	227
TCGA-A7-A6VW-01A-21R-A33J-07	0	1.5422	0.9004	0	0	370.941	1.8147	0	36.6767	0	0	0	0.9235	0.4617	0	0	0	0	1.3852	61.8743	14.7759	TCGA-A7-A6VW	BRCA	48	FEMALE	BLACK OR AFRICAN AMERICAN	Stage IIA	[Not Applicable]	Infiltrating Ductal Carcinoma	[Not Available]	2013	Post (prior bilateral ovariectomy OR >12 mo since LMP with no prior hysterectomy)	-17539	Alive	TUMOR FREE	285	#N/A	[Not Available]	#N/A	#N/A	#N/A	#N/A	[Not Available]	Close	#N/A	0	285	0	285
TCGA-S3-AA14-01A-11R-A41B-07	0	19.7624	0	0	1.7413	282.354	0	0	291.776	0	0	154.403	23172.7	282.884	14181.4	56.9149	2.8176	0	38.3189	15.2149	15.2149	TCGA-S3-AA14	BRCA	47	FEMALE	BLACK OR AFRICAN AMERICAN	Stage I	[Not Applicable]	Infiltrating Ductal Carcinoma	[Not Available]	2013	Post (prior bilateral ovariectomy OR >12 mo since LMP with no prior hysterectomy)	-17352	Alive	TUMOR FREE	529	#N/A	[Not Available]	#N/A	#N/A	#N/A	#N/A	[Not Available]	Negative	#N/A	0	529	0	529
TCGA-AN-A0FV-01A-11R-A00Z-07	0	1.5516	2.0125	0	0	276.801	0	0	9.9856	0	0	2.3044	68.29	7.6812	221.603	0	0	1.5362	142.487	3.0725	0.7681	TCGA-AN-A0FV	BRCA	58	FEMALE	WHITE	Stage IIA	[Not Applicable]	Infiltrating Ductal Carcinoma	[Not Available]	2010	Post (prior bilateral ovariectomy OR >12 mo since LMP with no prior hysterectomy)	-21479	Alive	TUMOR FREE	10	#N/A	[Not Available]	#N/A	#N/A	#N/A	#N/A	[Not Available]	Negative	#N/A	0	10	0	10
TCGA-AO-A0JC-01A-11R-A056-07	0	0	0	0	0	213.656	155.398	30.3809	7.7452	2.1891	0	0	13.9667	50.3503	0.8757	1.7513	0	0	3.0648	121.278	4.3783	TCGA-AO-A0JC	BRCA	64	FEMALE	WHITE	Stage IIA	[Not Applicable]	Infiltrating Ductal Carcinoma	[Not Available]	2006	Post (prior bilateral ovariectomy OR >12 mo since LMP with no prior hysterectomy)	-23404	Alive	TUMOR FREE	1547	#N/A	[Not Available]	#N/A	#N/A	#N/A	#N/A	[Not Available]	Negative	#N/A	0	1547	0	1547
TCGA-BH-A0AW-01A-11R-A056-07	0	4.5614	0	0	0	202.858	125.178	8.2117	8.3701	0	0	112.62	271.602	585.173	41.313	2.2637	0.5659	1.6978	381.438	10.1868	4.5274	TCGA-BH-A0AW	BRCA	56	FEMALE	WHITE	Stage IIA	[Not Applicable]	Infiltrating Ductal Carcinoma	[Not Available]	2008	Post (prior bilateral ovariectomy OR >12 mo since LMP with no prior hysterectomy)	-20468	Alive	TUMOR FREE	622	#N/A	[Not Available]	#N/A	#N/A	#N/A	#N/A	[Not Available]	Negative	#N/A	0	622	0	622
TCGA-EW-A1PC-01B-11R-A21T-07	0	0	0	0	0	168.514	0	0	5.2869	1.6463	0	1.1759	2.1167	46.096	0.2352	1.1759	6.8203	0	70.555	3.5278	16.698	TCGA-EW-A1PC	BRCA	66	FEMALE	BLACK OR AFRICAN AMERICAN	Stage IIB	[Not Applicable]	Infiltrating Ductal Carcinoma	[Not Available]	2011	Post (prior bilateral ovariectomy OR >12 mo since LMP with no prior hysterectomy)	-24434	Alive	TUMOR FREE	187	#N/A	[Not Available]	#N/A	#N/A	#N/A	#N/A	[Not Available]	Negative	#N/A	0	187	0	187
TCGA-C8-A131-01A-11R-A115-07	0	0	0	0	0	148.465	1.1983	0	0	0	0	8.1809	1059.09	0.4812	176.612	0	122.714	0	48.1232	0.4812	120.308	TCGA-C8-A131	BRCA	82	FEMALE	ASIAN	Stage IIIA	[Not Applicable]	Infiltrating Ductal Carcinoma	[Not Available]	2010	Post (prior bilateral ovariectomy OR >12 mo since LMP with no prior hysterectomy)	-29966	Alive	TUMOR FREE	411	#N/A	[Not Available]	#N/A	#N/A	#N/A	#N/A	[Not Available]	Negative	#N/A	0	411	0	411
TCGA-D8-A143-01A-11R-A115-07	0	0	0.7301	0	0	144.863	0	0	1.9406	0	0	9.4573	994.268	1.8915	433.144	0	24.2107	0.7566	8.3224	142.994	1.8915	TCGA-D8-A143	BRCA	51	FEMALE	WHITE	Stage IIA	[Not Applicable]	Infiltrating Ductal Carcinoma	[Not Available]	2010	Post (prior bilateral ovariectomy OR >12 mo since LMP with no prior hysterectomy)	-18984	Alive	TUMOR FREE	431	#N/A	[Not Available]	#N/A	#N/A	#N/A	#N/A	[Not Available]	Negative	#N/A	0	431	0	431
TCGA-BH-A0GZ-01A-11R-A056-07	0	0	0	0	0	140.407	114.833	17.0045	8.1284	1.9171	0.4793	0.4793	141.332	11.9817	0.4793	0.9585	0.4793	0	1.9171	11.0232	2.8756	TCGA-BH-A0GZ	BRCA	62	FEMALE	WHITE	Stage IIA	[Not Applicable]	Infiltrating Ductal Carcinoma	[Not Available]	2009	Post (prior bilateral ovariectomy OR >12 mo since LMP with no prior hysterectomy)	-22714	Alive	TUMOR FREE	328	#N/A	[Not Available]	#N/A	#N/A	#N/A	#N/A	[Not Available]	Negative	#N/A	0	328	0	328
TCGA-B6-A0RS-01A-11R-A084-07	0	0	0.9154	0	0	137.999	1.8529	0	3.8037	0	0	0.3157	0.947	0.947	1.2626	0.3157	1.5783	0	101.957	1.2626	11.048	TCGA-B6-A0RS	BRCA	38	FEMALE	WHITE	Stage IIA	[Not Applicable]	Infiltrating Ductal Carcinoma	[Not Available]	1988	Indeterminate (neither Pre or Postmenopausal)	-14134	Dead	WITH TUMOR	#N/A	3063	[Not Available]	New Primary Tumor	Other, specify	Breast	2041	[Not Available]	Negative	#N/A	1	3063	1	3063
TCGA-BH-A0DI-01A-21R-A12P-07	0	0	2.4151	0	0	136.721	0	0	4.0251	0	0	0	0	12.8638	0.415	0	0.415	0.415	0.8299	21.5779	2.9047	TCGA-BH-A0DI	BRCA	63	FEMALE	WHITE	Stage IIB	[Not Applicable]	Infiltrating Ductal Carcinoma	[Not Available]	2009	Post (prior bilateral ovariectomy OR >12 mo since LMP with no prior hysterectomy)	-23327	Alive	TUMOR FREE	912	#N/A	[Not Available]	#N/A	#N/A	#N/A	#N/A	[Not Available]	Negative	#N/A	0	912	0	912
TCGA-A7-A0D9-01A-31R-A056-07	0	0	0	0	0	126.476	65.6072	12.9436	0	2.4702	0	0	0	1.2351	0.8234	0.4117	0	0	0.4117	7.8221	4.5286	TCGA-A7-A0D9	BRCA	37	FEMALE	WHITE	Stage IIA	[Not Applicable]	Infiltrating Ductal Carcinoma	[Not Available]	2009	Pre (<6 months since LMP AND no prior bilateral ovariectomy AND not on estrogen replacement)	-13836	Alive	TUMOR FREE	1139	#N/A	[Not Available]	#N/A	#N/A	#N/A	#N/A	[Not Available]	Negative	#N/A	0	1139	0	1139
TCGA-B6-A0RH-01A-21R-A115-07	0	0	2.3315	0	0	124.948	2.3624	0	0	0	0.6878	0.6878	3.0949	84.2503	0	0	0	0	5.5021	1.3755	14.7868	TCGA-B6-A0RH	BRCA	51	FEMALE	BLACK OR AFRICAN AMERICAN	Stage IIA	[Not Applicable]	Infiltrating Ductal Carcinoma	[Not Available]	1991	Indeterminate (neither Pre or Postmenopausal)	-18759	Dead	TUMOR FREE	#N/A	6456	[Not Available]	Locoregional Disease	Other, specify	Chest Wall	2165	[Not Available]	Negative	#N/A	1	6456	0	6456
TCGA-BH-A1FU-01A-11R-A14D-07	0	0	0	0.6713	0	116.016	0.6843	0	0	0	0	0	15.5912	2.5985	12.9926	0	0.4331	0	74.058	7.7956	2.5985	TCGA-BH-A1FU	BRCA	44	FEMALE	WHITE	Stage IA	[Not Applicable]	Infiltrating Ductal Carcinoma	[Not Available]	1997	[Not Available]	-16174	Dead	WITH TUMOR	#N/A	1688	[Not Available]	#N/A	#N/A	#N/A	#N/A	[Not Available]	[Not Available]	#N/A	1	1688	1	1688
TCGA-UU-A93S-01A-21R-A41B-07	0	2.301	0	0	0	105.029	56.6643	5.3256	0	0	0	0	23.1548	0.7236	9.4067	0	5.0651	0	0	1.4472	75.2533	TCGA-UU-A93S	BRCA	63	FEMALE	BLACK OR AFRICAN AMERICAN	Stage IV	[Not Applicable]	Infiltrating Ductal Carcinoma	[Not Available]	2013	Post (prior bilateral ovariectomy OR >12 mo since LMP with no prior hysterectomy)	-23278	Dead	WITH TUMOR	#N/A	116	[Not Available]	#N/A	#N/A	#N/A	#N/A	[Not Available]	Positive	#N/A	1	116	1	116
TCGA-OL-A5RY-01A-21R-A28M-07	0	0	0	0	0	102.676	0	0	3.3384	0	0	2.0387	8.1549	17.8389	7.6453	0	1.5291	0	1.5291	38.736	6.1162	TCGA-OL-A5RY	BRCA	52	FEMALE	BLACK OR AFRICAN AMERICAN	Stage IIA	[Not Applicable]	Infiltrating Ductal Carcinoma	[Not Available]	2011	Post (prior bilateral ovariectomy OR >12 mo since LMP with no prior hysterectomy)	-19216	Alive	TUMOR FREE	752	#N/A	[Not Available]	#N/A	#N/A	#N/A	#N/A	[Not Available]	Negative	#N/A	0	752	0	752
TCGA-AR-A24U-01A-11R-A169-07	0	1.6154	0	0	0	102.617	33.056	0.7845	0.9533	0	0	0.331	44.9529	1.6551	11.5858	1.6551	0.662	0	1.6551	10.9238	2.9792	TCGA-AR-A24U	BRCA	47	FEMALE	WHITE	Stage IIA	[Not Applicable]	Infiltrating Ductal Carcinoma	[Not Available]	2006	Pre (<6 months since LMP AND no prior bilateral ovariectomy AND not on estrogen replacement)	-17523	Alive	TUMOR FREE	3128	#N/A	[Not Available]	#N/A	#N/A	#N/A	#N/A	[Not Available]	Negative	#N/A	0	3128	0	3128
TCGA-BH-A0B3-01A-11R-A056-07	0	1.5088	2.0501	0	0	102.286	58.1246	3.9313	4.4803	0.3839	0	0	0	1.9196	0	0	39.1592	0	3.4552	226.893	10.3657	TCGA-BH-A0B3	BRCA	53	FEMALE	WHITE	Stage IIB	[Not Applicable]	Infiltrating Ductal Carcinoma	[Not Available]	2007	Post (prior bilateral ovariectomy OR >12 mo since LMP with no prior hysterectomy)	-19479	Alive	TUMOR FREE	1203	#N/A	[Not Available]	#N/A	#N/A	#N/A	#N/A	[Not Available]	Negative	#N/A	0	1203	0	1203
TCGA-B6-A0RE-01A-11R-A056-07	0	0	0	0	0	101.418	39.2708	2.2109	3.7234	0.7717	0.3858	0	0	0.3858	0	0	1.9292	0	0.3858	541.719	3.0867	TCGA-B6-A0RE	BRCA	61	FEMALE	BLACK OR AFRICAN AMERICAN	Stage X	[Not Applicable]	Infiltrating Ductal Carcinoma	[Not Available]	1989	Indeterminate (neither Pre or Postmenopausal)	-22449	Alive	TUMOR FREE	7777	#N/A	[Not Available]	#N/A	#N/A	#N/A	#N/A	[Not Available]	Negative	#N/A	0	7777	0	7777
TCGA-C8-A12Q-01A-11R-A115-07	0	0.7613	0.4866	0	0	97.6998	1.9584	0	0	0.5971	1.4926	71.6471	5438.57	197.328	200.911	5.6721	12.8368	0	2.6868	13.4338	2.6868	TCGA-C8-A12Q	BRCA	78	FEMALE	ASIAN	Stage IIIA	[Not Applicable]	Infiltrating Ductal Carcinoma	[Not Available]	2010	Post (prior bilateral ovariectomy OR >12 mo since LMP with no prior hysterectomy)	-28733	Dead	WITH TUMOR	#N/A	385	[Not Available]	#N/A	#N/A	#N/A	#N/A	[Not Available]	Negative	#N/A	1	385	1	385
TCGA-AN-A0XO-01A-11R-A109-07	0	0	0	0	0	92.3886	0	0	0	0	0	0	5.1169	15.0664	0.2843	0.5685	0.2843	0	0.8528	8.8125	1.1371	TCGA-AN-A0XO	BRCA	59	FEMALE	WHITE	Stage IIIA	[Not Applicable]	Infiltrating Ductal Carcinoma	[Not Available]	2010	Post (prior bilateral ovariectomy OR >12 mo since LMP with no prior hysterectomy)	-21640	Alive	TUMOR FREE	375	#N/A	[Not Available]	#N/A	#N/A	#N/A	#N/A	[Not Available]	Negative	#N/A	0	375	0	375
TCGA-C8-A26V-01A-11R-A16F-07	0	0	0	0	0	86.131	0.559	0	1.9532	0	0	3.5635	50.4341	291.313	0.4454	7.1269	2.2272	0	7.3496	2.8953	5.1225	TCGA-C8-A26V	BRCA	47	FEMALE	ASIAN	Stage IIIA	[Not Applicable]	Infiltrating Ductal Carcinoma	[Not Available]	2010	Peri (6-12 months since last menstrual period)	-17468	Alive	TUMOR FREE	616	#N/A	[Not Available]	#N/A	#N/A	#N/A	#N/A	[Not Available]	Negative	#N/A	0	616	0	616
TCGA-C8-A278-01A-11R-A169-07	0	2.1463	0	0	0	80.6608	9.2001	0	7.0006	0	0.9968	97.6821	11069.4	300.356	1366.22	61.7989	9.6353	2.3258	8.3063	5.9805	4.9838	TCGA-C8-A278	BRCA	61	FEMALE	ASIAN	Stage IIIA	[Not Applicable]	Infiltrating Ductal Carcinoma	[Not Available]	2010	Post (prior bilateral ovariectomy OR >12 mo since LMP with no prior hysterectomy)	-22598	Alive	TUMOR FREE	297	#N/A	[Not Available]	#N/A	#N/A	#N/A	#N/A	[Not Available]	Negative	#N/A	0	297	0	297
TCGA-A8-A07U-01A-11R-A034-07	0	1.7317	0	0	0	61.6565	17.4368	1.9476	4.4152	0	0	2.3996	160.306	23.1957	1.1998	0.3999	3.5993	0	21.1961	44.7917	11.9978	TCGA-A8-A07U	BRCA	66	FEMALE	[Not Available]	Stage IIIA	[Not Applicable]	Infiltrating Ductal Carcinoma	[Not Available]	2009	Post (prior bilateral ovariectomy OR >12 mo since LMP with no prior hysterectomy)	-24411	Alive	TUMOR FREE	760	#N/A	[Not Available]	#N/A	#N/A	#N/A	#N/A	[Not Available]	Negative	#N/A	0	760	0	760
TCGA-E9-A1N6-01A-11R-A144-07	0	0	0	0	0	60.4608	0	0	3.6722	0	0	0	81.6722	109.264	0	0	2.8504	0	0.4751	9.5012	7.601	TCGA-E9-A1N6	BRCA	52	FEMALE	WHITE	Stage IIB	[Not Applicable]	Infiltrating Ductal Carcinoma	[Not Available]	2010	Post (prior bilateral ovariectomy OR >12 mo since LMP with no prior hysterectomy)	-19327	Dead	WITH TUMOR	#N/A	678	[Not Available]	Distant Metastasis	Bone	#N/A	443	[Not Available]	Negative	#N/A	1	678	1	678
TCGA-AO-A0J2-01A-11R-A034-07	0	5.6846	0	0	0	58.4841	20.9004	2.6927	0	0	0	257.587	8573.04	72.6599	2272.97	0	3.4193	0	19.6609	9.9729	5.6988	TCGA-AO-A0J2	BRCA	41	FEMALE	WHITE	Stage IA	[Not Applicable]	Infiltrating Ductal Carcinoma	[Not Available]	2008	Pre (<6 months since LMP AND no prior bilateral ovariectomy AND not on estrogen replacement)	-15324	Alive	TUMOR FREE	997	#N/A	[Not Available]	#N/A	#N/A	#N/A	#N/A	[Not Available]	Negative	#N/A	0	997	0	997
TCGA-AC-A23C-01A-12R-A169-07	0	0.7309	0	0	0	49.2706	0.746	0.7099	2.9869	0.3008	0	10.8287	9.9263	240.036	0.6016	0.3008	2.7072	0	4.8128	6.3167	8.4223	TCGA-AC-A23C	BRCA	62	FEMALE	WHITE	Stage IIB	[Not Applicable]	Infiltrating Ductal Carcinoma	[Not Available]	2010	Post (prior bilateral ovariectomy OR >12 mo since LMP with no prior hysterectomy)	-22751	Alive	TUMOR FREE	585	#N/A	[Not Available]	#N/A	#N/A	#N/A	#N/A	[Not Available]	Negative	#N/A	0	585	0	585
TCGA-BH-A0EE-01A-11R-A034-07	0	0	0	0	0	49.205	0	0	0	0	0	6.6946	7.3305	201.172	0.3347	0	5.6904	0	10.7113	32.4686	94.0586	TCGA-BH-A0EE	BRCA	68	FEMALE	WHITE	Stage IIB	[Not Applicable]	Infiltrating Ductal Carcinoma	[Not Available]	2007	Post (prior bilateral ovariectomy OR >12 mo since LMP with no prior hysterectomy)	-24850	Alive	TUMOR FREE	943	#N/A	[Not Available]	#N/A	#N/A	#N/A	#N/A	[Not Available]	Negative	#N/A	0	943	0	943
TCGA-AO-A03N-01B-11R-A10J-07	0	0	0	0	0	46.0691	0	0	0	0	1.0015	14.5218	946.845	108.162	30.0451	62.0931	66.0991	1.0015	39.5593	0	5.0075	TCGA-AO-A03N	BRCA	59	FEMALE	WHITE	Stage IIB	[Not Applicable]	Infiltrating Ductal Carcinoma	[Not Available]	2006	Post (prior bilateral ovariectomy OR >12 mo since LMP with no prior hysterectomy)	-21816	Alive	WITH TUMOR	2031	#N/A	[Not Available]	Locoregional Disease	#N/A	#N/A	1645	[Not Available]	Negative	#N/A	0	2031	0	2031
TCGA-A8-A07G-01A-11R-A034-07	0	3.4272	0	0	1.0199	45.158	86.7857	0.9684	0	0	0	1.3736	65.8242	51.511	1.0302	1.3736	0.3434	0	5.8379	27.1291	5.4945	TCGA-A8-A07G	BRCA	65	FEMALE	[Not Available]	Stage IIA	[Not Applicable]	Infiltrating Ductal Carcinoma	[Not Available]	2009	Post (prior bilateral ovariectomy OR >12 mo since LMP with no prior hysterectomy)	-23926	Alive	TUMOR FREE	577	#N/A	[Not Available]	#N/A	#N/A	#N/A	#N/A	[Not Available]	Negative	#N/A	0	577	0	577
TCGA-A7-A56D-01A-11R-A27Q-07	0	0	0	0	0	40.0935	0	0	3.2977	0	2.0027	1.3351	0.6676	4.6729	0.6676	0	0.6676	0	24.6996	0	9.3458	TCGA-A7-A56D	BRCA	84	FEMALE	BLACK OR AFRICAN AMERICAN	Stage IIA	[Not Applicable]	Infiltrating Ductal Carcinoma	[Not Available]	2012	Post (prior bilateral ovariectomy OR >12 mo since LMP with no prior hysterectomy)	-30783	Alive	TUMOR FREE	448	#N/A	[Not Available]	#N/A	#N/A	#N/A	#N/A	[Not Available]	Negative	#N/A	0	448	0	448
TCGA-D8-A142-01A-11R-A115-07	0	0	0	0	0	34.2417	0	0.8367	3.9655	0	0	1.0624	0.5312	2.9216	0	0.2656	343.161	0	1.328	203.453	65.073	TCGA-D8-A142	BRCA	74	FEMALE	WHITE	Stage IIB	[Not Applicable]	Infiltrating Ductal Carcinoma	[Not Available]	2010	Post (prior bilateral ovariectomy OR >12 mo since LMP with no prior hysterectomy)	-27313	Alive	TUMOR FREE	425	#N/A	[Not Available]	#N/A	#N/A	#N/A	#N/A	[Not Available]	Negative	#N/A	0	425	0	425
TCGA-D8-A13Z-01A-11R-A115-07	0	0	0	0	0	33.4683	0	0	0	0	0.5398	35.0877	86.5425	104.993	45.8839	4.3185	159.514	0.5398	69.3657	11.6059	1.6194	TCGA-D8-A13Z	BRCA	51	FEMALE	WHITE	[Not Available]	[Not Applicable]	Infiltrating Ductal Carcinoma	[Not Available]	2010	Post (prior bilateral ovariectomy OR >12 mo since LMP with no prior hysterectomy)	-18942	Alive	TUMOR FREE	635	#N/A	[Not Available]	#N/A	#N/A	#N/A	#N/A	[Not Available]	Negative	#N/A	0	635	0	635
TCGA-B6-A1KN-01A-11R-A13Q-07	0	0.8044	0	1.5885	0	30.2536	0	0	0	0	0	0.2915	0.5829	0	0	1.7488	0	2.3317	12.2413	6.7036	3.2061	TCGA-B6-A1KN	BRCA	57	FEMALE	WHITE	Stage IIIB	[Not Applicable]	Infiltrating Ductal Carcinoma	[Not Available]	1998	Post (prior bilateral ovariectomy OR >12 mo since LMP with no prior hysterectomy)	-21183	Alive	TUMOR FREE	4233	#N/A	[Not Available]	#N/A	#N/A	#N/A	#N/A	[Not Available]	Negative	#N/A	0	4233	0	4233
TCGA-A7-A13D-01A-13R-A12P-07	0	0	0	0	0	29.999	3.4447	1.0846	0	0	0	0	0	0.4062	0	0	0	0	4.8746	463.085	10.5616	TCGA-A7-A13D	BRCA	46	FEMALE	BLACK OR AFRICAN AMERICAN	Stage IIA	[Not Applicable]	Infiltrating Ductal Carcinoma	[Not Available]	2010	Post (prior bilateral ovariectomy OR >12 mo since LMP with no prior hysterectomy)	-17070	Alive	TUMOR FREE	965	#N/A	[Not Available]	#N/A	#N/A	#N/A	#N/A	[Not Available]	Negative	#N/A	0	965	0	965
TCGA-LL-A5YO-01A-21R-A28M-07	0	0.5893	0	0	0	29.5085	0	3.4972	0	0	0	6.6088	649.781	47.9141	8.261	0.5507	2.2029	1.1015	31.9427	32.4935	19.8265	TCGA-LL-A5YO	BRCA	50	FEMALE	BLACK OR AFRICAN AMERICAN	Stage IA	[Not Applicable]	Infiltrating Ductal Carcinoma	[Not Available]	2013	Pre (<6 months since LMP AND no prior bilateral ovariectomy AND not on estrogen replacement)	-18354	Alive	TUMOR FREE	440	#N/A	[Not Available]	#N/A	#N/A	#N/A	#N/A	[Not Available]	Negative	#N/A	0	440	0	440
TCGA-A7-A26I-01A-11R-A169-07	0	0	0	0	0	25.7261	0	0	0	0	0	0	0	0	0	2.4896	0.5533	0	8.0221	35.1314	2.7663	TCGA-A7-A26I	BRCA	65	FEMALE	WHITE	Stage IIA	[Not Applicable]	Infiltrating Ductal Carcinoma	[Not Available]	2011	Post (prior bilateral ovariectomy OR >12 mo since LMP with no prior hysterectomy)	-23948	Alive	TUMOR FREE	661	#N/A	[Not Available]	#N/A	#N/A	#N/A	#N/A	[Not Available]	Negative	#N/A	0	661	0	661
TCGA-EW-A6S9-01A-22R-A33J-07	0	0	0	0	0	23.6941	0	0.9522	0.9751	0	0.3824	0.3824	2.2945	14.914	0.3824	1.912	1.1472	1.912	183.556	11.0899	5.3537	TCGA-EW-A6S9	BRCA	34	FEMALE	BLACK OR AFRICAN AMERICAN	Stage IIA	[Not Applicable]	Infiltrating Ductal Carcinoma	[Not Available]	2013	[Not Available]	-12755	Alive	TUMOR FREE	463	#N/A	[Not Available]	#N/A	#N/A	#N/A	#N/A	[Not Available]	[Not Available]	#N/A	0	463	0	463
TCGA-BH-A18J-01A-11R-A12D-07	0	0	0	0	0	22.3657	0	0	0	0	0.6989	0.6989	328.017	49.6238	3.1452	1.0484	0.3495	0	0.6989	4.1936	2.7957	TCGA-BH-A18J	BRCA	56	FEMALE	WHITE	Stage IV	[Not Applicable]	Infiltrating Ductal Carcinoma	[Not Available]	2000	[Not Available]	-20678	Dead	WITH TUMOR	#N/A	612	[Not Available]	#N/A	#N/A	#N/A	#N/A	[Not Available]	Negative	#N/A	1	612	1	612
TCGA-EW-A1P1-01A-31R-A14D-07	0	3.2708	0	0	1.5314	19.1176	0	0	23.7475	0	0	34.9899	7227.41	3.0426	1668.86	1.0142	1.0142	0	1.5213	50.2028	3.0426	TCGA-EW-A1P1	BRCA	68	FEMALE	WHITE	Stage IIIC	[Not Applicable]	Infiltrating Ductal Carcinoma	[Not Available]	2008	Post (prior bilateral ovariectomy OR >12 mo since LMP with no prior hysterectomy)	-24923	Alive	TUMOR FREE	1210	#N/A	[Not Available]	Distant Metastasis	Lung	#N/A	1014	[Not Available]	Negative	#N/A	0	1210	0	1210
TCGA-AN-A0XN-01A-21R-A109-07	0	0	1.6588	0	0	18.7846	1.6837	0	2.2814	0	0	0	0	0	0.4981	0.9963	0	0	0	5.9776	6.4757	TCGA-AN-A0XN	BRCA	68	FEMALE	WHITE	Stage IIIA	[Not Applicable]	Infiltrating Ductal Carcinoma	[Not Available]	2010	Post (prior bilateral ovariectomy OR >12 mo since LMP with no prior hysterectomy)	-25029	Alive	TUMOR FREE	10	#N/A	[Not Available]	#N/A	#N/A	#N/A	#N/A	[Not Available]	Negative	#N/A	0	10	0	10
TCGA-AN-A04C-01A-21R-A034-07	0	0.7342	0	0	0	18.7728	0	0	0	0	0	1.4187	55.3183	10.6402	8.1575	21.2804	4.6107	0.7093	325.59	1.4187	13.4776	TCGA-AN-A04C	BRCA	51	FEMALE	WHITE	Stage IIB	[Not Applicable]	Infiltrating Ductal Carcinoma	[Not Available]	2008	Post (prior bilateral ovariectomy OR >12 mo since LMP with no prior hysterectomy)	-18851	Alive	TUMOR FREE	54	#N/A	[Not Available]	#N/A	#N/A	#N/A	#N/A	[Not Available]	Positive	#N/A	0	54	0	54
TCGA-BH-A1FN-01A-11R-A13Q-07	0	0	0	0	0	18.6567	1.2788	0	0	0	0.4862	0	1.4587	1.9449	0	0	0	0.4862	10.2109	31.6051	1.4587	TCGA-BH-A1FN	BRCA	34	FEMALE	WHITE	Stage IIA	[Not Applicable]	Infiltrating Ductal Carcinoma	[Not Available]	1997	[Not Available]	-12525	Dead	WITH TUMOR	#N/A	2192	[Not Available]	#N/A	#N/A	#N/A	#N/A	[Not Available]	[Not Available]	#N/A	1	2192	1	2192
TCGA-E2-A152-01A-11R-A12D-07	0	0	0	0	0	18.2052	0	0	0	0	0	5.9365	11.4772	13.8518	3.1661	0.3958	178.886	0	13.0603	3.9577	3.1661	TCGA-E2-A152	BRCA	56	FEMALE	WHITE	Stage I	[Not Applicable]	Infiltrating Ductal Carcinoma	[Not Available]	2009	Post (prior bilateral ovariectomy OR >12 mo since LMP with no prior hysterectomy)	-20705	Alive	TUMOR FREE	2128	#N/A	[Not Available]	Distant Metastasis	Liver	#N/A	54	[Not Available]	Negative	#N/A	0	2128	0	2128
TCGA-AQ-A0Y5-01A-11R-A14M-07	0	0	0	0	0	17.5095	15.7762	0	0.9602	0	0	5.2952	270.5	30.7122	14.1206	150.384	0.353	0	0	0.353	0.353	TCGA-AQ-A0Y5	BRCA	70	FEMALE	WHITE	Stage IIIA	[Not Applicable]	Infiltrating Ductal Carcinoma	[Not Available]	2010	Post (prior bilateral ovariectomy OR >12 mo since LMP with no prior hysterectomy)	-25793	Dead	TUMOR FREE	#N/A	172	[Not Available]	#N/A	#N/A	#N/A	#N/A	[Not Available]	Negative	#N/A	1	172	0	172
TCGA-BH-A1EV-01A-11R-A137-07	0	0	0	0	0	17.4639	0	0	0	0	0	0.3881	14.3204	3.4928	0.7762	6.2094	0	0	0.7762	3.1047	24.0613	TCGA-BH-A1EV	BRCA	45	FEMALE	WHITE	Stage IIIA	[Not Applicable]	Infiltrating Ductal Carcinoma	[Not Available]	1999	[Not Available]	-16504	Dead	WITH TUMOR	#N/A	365	[Not Available]	#N/A	#N/A	#N/A	#N/A	[Not Available]	[Not Available]	#N/A	1	365	1	365
TCGA-E2-A14Y-01A-21R-A12D-07	0	0	0	0	0	16.5696	1.8211	0	11.2599	0	0	0	0	1.0588	0	0	0	0	0.5294	250.926	3.7057	TCGA-E2-A14Y	BRCA	35	FEMALE	WHITE	Stage IIA	[Not Applicable]	Infiltrating Ductal Carcinoma	[Not Available]	2009	Pre (<6 months since LMP AND no prior bilateral ovariectomy AND not on estrogen replacement)	-13004	Alive	TUMOR FREE	2109	#N/A	[Not Available]	#N/A	#N/A	#N/A	#N/A	[Not Available]	Negative	#N/A	0	2109	0	2109
TCGA-BH-A0HY-01A-11R-A056-07	0	0	0	0	0	15.4559	1.0882	0	0	0	0	0	0	1.8382	0	0.3676	0	0	69.4853	40.4412	6.25	TCGA-BH-A0HY	BRCA	60	FEMALE	WHITE	Stage I	[Not Applicable]	Infiltrating Ductal Carcinoma	[Not Available]	2009	Post (prior bilateral ovariectomy OR >12 mo since LMP with no prior hysterectomy)	-22179	Alive	TUMOR FREE	1545	#N/A	[Not Available]	#N/A	#N/A	#N/A	#N/A	[Not Available]	Negative	#N/A	0	1545	0	1545
TCGA-D8-A1JG-01B-11R-A13Q-07	0	0	0.3932	0	0	14.7261	0	1.2729	0.163	0.2587	0.5174	14.7468	213.916	260.785	502.685	0	320.807	0.5174	1428.89	321.066	2.5872	TCGA-D8-A1JG	BRCA	62	FEMALE	WHITE	Stage IIA	[Not Applicable]	Infiltrating Ductal Carcinoma	[Not Available]	2010	Post (prior bilateral ovariectomy OR >12 mo since LMP with no prior hysterectomy)	-22878	Alive	TUMOR FREE	1612	#N/A	[Not Available]	#N/A	#N/A	#N/A	#N/A	[Not Available]	Negative	#N/A	0	1612	0	1612
TCGA-AC-A23H-01A-11R-A157-07	0	0	0	0	0	13.8005	0	0	3.4576	0	0	0.2976	3.2731	13.3899	0.5951	0	2.3804	0	1.4878	2.3804	4.7608	TCGA-AC-A23H	BRCA	90	FEMALE	WHITE	Stage IIA	[Not Applicable]	Infiltrating Ductal Carcinoma	[Not Available]	2009	Post (prior bilateral ovariectomy OR >12 mo since LMP with no prior hysterectomy)	-32873	Dead	WITH TUMOR	#N/A	174	[Not Available]	#N/A	#N/A	#N/A	#N/A	[Not Available]	Negative	#N/A	1	174	1	174
TCGA-GI-A2C9-01A-11R-A21T-07	0	0	0	0	0	13.0172	0	0	2.6782	0.6679	12.356	0	0	0	0	0.6679	7.3468	6.011	9.3505	445.149	21.3725	TCGA-GI-A2C9	BRCA	58	FEMALE	BLACK OR AFRICAN AMERICAN	Stage IIB	[Not Applicable]	Infiltrating Ductal Carcinoma	[Not Available]	2003	Post (prior bilateral ovariectomy OR >12 mo since LMP with no prior hysterectomy)	-21534	Alive	TUMOR FREE	3342	#N/A	[Not Available]	#N/A	#N/A	#N/A	#N/A	[Not Available]	Negative	#N/A	0	3342	0	3342
TCGA-LD-A7W5-01A-22R-A352-07	0	1.0837	0	2.1353	0	12.6066	0	0	2.1321	0	0.3206	3.8474	2.2251	11.8628	0.6412	16.9926	7.0535	0.3206	2.2443	11.2215	15.7102	TCGA-LD-A7W5	BRCA	52	FEMALE	BLACK OR AFRICAN AMERICAN	Stage IIIC	[Not Applicable]	Infiltrating Ductal Carcinoma	[Not Available]	2013	Pre (<6 months since LMP AND no prior bilateral ovariectomy AND not on estrogen replacement)	-19169	Alive	WITH TUMOR	216	#N/A	[Not Available]	#N/A	#N/A	#N/A	#N/A	[Not Available]	Positive	#N/A	0	216	0	216
TCGA-PL-A8LY-01A-11R-A41B-07	0	0.5473	0	0	0	12.5889	0	0	0	0	0	0	7.6628	97.4275	0	0	1.0947	0	10.3996	222.222	4.9261	TCGA-PL-A8LY	BRCA	30	FEMALE	BLACK OR AFRICAN AMERICAN	Stage IIB	[Not Applicable]	Infiltrating Ductal Carcinoma	[Not Available]	2013	Pre (<6 months since LMP AND no prior bilateral ovariectomy AND not on estrogen replacement)	-11199	Alive	WITH TUMOR	8	#N/A	[Not Available]	#N/A	#N/A	#N/A	#N/A	[Not Available]	[Not Available]	#N/A	0	8	0	8
TCGA-A8-A09E-01A-11R-A00Z-07	0	0	0	0	0	10.5523	0	0	2.6235	0.775	2.3251	1.5501	0	46.5029	0	0	0.775	1.9376	2.3251	4.2628	6.2004	TCGA-A8-A09E	BRCA	73	FEMALE	[Not Available]	Stage IIIB	[Not Applicable]	Infiltrating Ductal Carcinoma	[Not Available]	2008	Post (prior bilateral ovariectomy OR >12 mo since LMP with no prior hysterectomy)	-26724	Alive	WITH TUMOR	1492	#N/A	[Not Available]	#N/A	#N/A	#N/A	#N/A	[Not Available]	Positive	#N/A	0	1492	0	1492
TCGA-AR-A1AR-01A-31R-A137-07	0	0	0	0	0	10.1335	0	0	0	0	0	0	0.2472	0	0	0	12.3579	0	0.4943	238.754	0.9886	TCGA-AR-A1AR	BRCA	50	FEMALE	WHITE	Stage IIIA	[Not Applicable]	Infiltrating Ductal Carcinoma	[Not Available]	2007	Post (prior bilateral ovariectomy OR >12 mo since LMP with no prior hysterectomy)	-18482	Dead	WITH TUMOR	#N/A	524	[Not Available]	New Primary Tumor	Other, specify	Breast	268	[Not Available]	Negative	#N/A	1	524	1	524
TCGA-AO-A0JL-01A-11R-A056-07	0	0	0	0	0	9.7812	0	0	0	1.2226	0	1.834	13.4491	7.3359	1.2226	7.3359	248.809	0	28.1209	146.718	64.1891	TCGA-AO-A0JL	BRCA	59	FEMALE	WHITE	Stage IIIA	[Not Applicable]	Infiltrating Ductal Carcinoma	[Not Available]	2006	Post (prior bilateral ovariectomy OR >12 mo since LMP with no prior hysterectomy)	-21895	Alive	TUMOR FREE	1683	#N/A	[Not Available]	#N/A	#N/A	#N/A	#N/A	[Not Available]	Negative	#N/A	0	1683	0	1683
TCGA-B6-A409-01A-11R-A24H-07	0	0	0	0.4642	0	9.7107	0	0	0	0	0.318	0.9539	133.863	12.0827	2.8617	12.4006	23.5294	0	0.9539	52.1463	0.9539	TCGA-B6-A409	BRCA	44	FEMALE	BLACK OR AFRICAN AMERICAN	Stage IIIA	[Not Applicable]	Infiltrating Ductal Carcinoma	[Not Available]	2008	Pre (<6 months since LMP AND no prior bilateral ovariectomy AND not on estrogen replacement)	-16178	Dead	WITH TUMOR	#N/A	573	[Not Available]	Distant Metastasis	Lung	#N/A	456	[Not Available]	Negative	#N/A	1	573	1	573
TCGA-E9-A1R2-01A-11R-A14D-07	0	0.92	1.0028	0	0	9.5768	0	0	0	0	0	0	0	0	0	0	0.46	0	0.46	6.4397	2.2999	TCGA-E9-A1R2	BRCA	51	FEMALE	WHITE	Stage IIIC	[Not Applicable]	Infiltrating Ductal Carcinoma	[Not Available]	2011	Post (prior bilateral ovariectomy OR >12 mo since LMP with no prior hysterectomy)	-18936	Alive	TUMOR FREE	1063	#N/A	[Not Available]	#N/A	#N/A	#N/A	#N/A	[Not Available]	Positive	#N/A	0	1063	0	1063
TCGA-OL-A5RW-01A-11R-A28M-07	0	0	0	0	0	9.5429	0	0	0	0	0	0	0	0	0	7.0316	0	0.5023	9.5429	140.131	47.2125	TCGA-OL-A5RW	BRCA	40	FEMALE	BLACK OR AFRICAN AMERICAN	Stage IIA	[Not Applicable]	Infiltrating Ductal Carcinoma	[Not Available]	2010	Pre (<6 months since LMP AND no prior bilateral ovariectomy AND not on estrogen replacement)	-14638	Alive	TUMOR FREE	1106	#N/A	[Not Available]	#N/A	#N/A	#N/A	#N/A	[Not Available]	Negative	#N/A	0	1106	0	1106
TCGA-BH-A5J0-01A-11R-A27Q-07	0	0	0	0	0	9.4393	0	0	1.6821	0.4634	0	0.9268	7.8313	33.3642	0	0.4634	1.3902	0	7.8777	0.4634	9.2678	TCGA-BH-A5J0	BRCA	63	FEMALE	BLACK OR AFRICAN AMERICAN	Stage IA	[Not Applicable]	Infiltrating Ductal Carcinoma	[Not Available]	2012	Post (prior bilateral ovariectomy OR >12 mo since LMP with no prior hysterectomy)	-23072	Alive	TUMOR FREE	715	#N/A	[Not Available]	#N/A	#N/A	#N/A	#N/A	[Not Available]	Negative	#N/A	0	715	0	715
TCGA-BH-A1F2-01A-31R-A13Q-07	0	0	0	0	0	9.3397	2.2776	0	0	0.3057	0	0	0	19.8717	0.3057	7.643	0	0	0	1.8343	1.2229	TCGA-BH-A1F2	BRCA	53	FEMALE	WHITE	Stage IIIB	[Not Applicable]	Infiltrating Ductal Carcinoma	[Not Available]	1999	[Not Available]	-19701	Dead	TUMOR FREE	#N/A	959	[Not Available]	#N/A	#N/A	#N/A	#N/A	[Not Available]	[Not Available]	#N/A	1	959	0	959
TCGA-D8-A1J9-01A-11R-A13Q-07	0	0	0	0	0	8.9665	0	1.2376	0	0	0	19.6232	1829.35	70.382	286.238	3.4014	0.7849	0	0.7849	2.6164	5.7561	TCGA-D8-A1J9	BRCA	48	FEMALE	WHITE	Stage IA	[Not Applicable]	Infiltrating Ductal Carcinoma	[Not Available]	2010	Post (prior bilateral ovariectomy OR >12 mo since LMP with no prior hysterectomy)	-17879	Alive	TUMOR FREE	532	#N/A	[Not Available]	#N/A	#N/A	#N/A	#N/A	[Not Available]	Negative	#N/A	0	532	0	532
TCGA-OL-A5D6-01A-21R-A27Q-07	0	0	0	0	0	8.6571	3.1317	0	0	2.0502	0.5126	664.787	27533.8	169.144	6331.62	0.5126	147.617	1.5377	70.733	88.1599	7.6884	TCGA-OL-A5D6	BRCA	71	FEMALE	BLACK OR AFRICAN AMERICAN	Stage IIA	[Not Applicable]	Infiltrating Ductal Carcinoma	[Not Available]	2009	Post (prior bilateral ovariectomy OR >12 mo since LMP with no prior hysterectomy)	-26052	Dead	TUMOR FREE	#N/A	1104	[Not Available]	#N/A	#N/A	#N/A	#N/A	[Not Available]	Negative	#N/A	1	1104	0	1104
TCGA-E2-A1BC-01A-11R-A12P-07	0	0	0	0	0	8.3294	5.1949	0	0	0.7955	0	74.7812	18316.5	16.7064	3412.09	0.7955	0.7955	0	0.7955	3.1822	5.5688	TCGA-E2-A1BC	BRCA	63	FEMALE	[Not Available]	Stage IA	[Not Applicable]	Infiltrating Ductal Carcinoma	[Not Available]	2010	Post (prior bilateral ovariectomy OR >12 mo since LMP with no prior hysterectomy)	-23168	Alive	TUMOR FREE	501	#N/A	[Not Available]	#N/A	#N/A	#N/A	#N/A	[Not Available]	Positive	#N/A	0	501	0	501
TCGA-OL-A66P-01A-11R-A31O-07	0	0	0	0	0	8.0863	2.705	0	0	0	0	35.2518	3305.99	7.1942	2828.78	0	11.5108	1.4388	38.1295	1.4388	30.9353	TCGA-OL-A66P	BRCA	75	FEMALE	BLACK OR AFRICAN AMERICAN	Stage IIA	[Not Applicable]	Infiltrating Ductal Carcinoma	[Not Available]	2013	[Not Available]	-27489	Alive	TUMOR FREE	428	#N/A	[Not Available]	#N/A	#N/A	#N/A	#N/A	[Not Available]	Negative	#N/A	0	428	0	428
TCGA-C8-A12N-01A-11R-A115-07	0	0.4112	0	0	0	8.0016	0	0	1.2577	0	2.0155	0.4031	152.353	1.6124	8.0621	0.4031	0.4031	0	0	8.4652	5.6435	TCGA-C8-A12N	BRCA	58	FEMALE	ASIAN	Stage IIA	[Not Applicable]	Infiltrating Ductal Carcinoma	[Not Available]	2010	Post (prior bilateral ovariectomy OR >12 mo since LMP with no prior hysterectomy)	-21428	Alive	TUMOR FREE	358	#N/A	[Not Available]	#N/A	#N/A	#N/A	#N/A	[Not Available]	Negative	#N/A	0	358	0	358
TCGA-BH-A0DZ-01A-11R-A00Z-07	0	0	0	0	0	7.6271	0	0	0	0	0	0	0	130.508	0	0	0	7.6271	281.356	5.0847	0	TCGA-BH-A0DZ	BRCA	43	FEMALE	WHITE	Stage IIB	[Not Applicable]	Infiltrating Ductal Carcinoma	[Not Available]	2009	Pre (<6 months since LMP AND no prior bilateral ovariectomy AND not on estrogen replacement)	-15980	Alive	TUMOR FREE	495	#N/A	[Not Available]	#N/A	#N/A	#N/A	#N/A	[Not Available]	Negative	#N/A	0	495	0	495
TCGA-A7-A13F-01A-11R-A12P-07	0	0	0	0	0	7.5863	2.4538	0	0	0	0	0	1.2048	43.3735	0	2.8112	0	0	0	3.6145	1.6064	TCGA-A7-A13F	BRCA	44	FEMALE	WHITE	Stage IIIA	[Not Applicable]	Infiltrating Ductal Carcinoma	[Not Available]	2010	Pre (<6 months since LMP AND no prior bilateral ovariectomy AND not on estrogen replacement)	-16363	Alive	TUMOR FREE	765	#N/A	[Not Available]	#N/A	#N/A	#N/A	#N/A	[Not Available]	Negative	#N/A	0	765	0	765
TCGA-B6-A0IK-01A-12R-A056-07	0	0	0	0	0	7.5145	0	0	0	0	0	1.7341	8.0925	8.6705	0	6.9364	2.8902	0	3.4682	33.526	4.0462	TCGA-B6-A0IK	BRCA	63	FEMALE	WHITE	Stage IIIB	[Not Applicable]	Infiltrating Ductal Carcinoma	[Not Available]	1994	Indeterminate (neither Pre or Postmenopausal)	-23150	Dead	WITH TUMOR	#N/A	571	[Not Available]	Distant Metastasis	Brain	#N/A	489	[Not Available]	Negative	#N/A	1	571	1	571
TCGA-EW-A2FR-01A-11R-A21T-07	0	0	0	0	0	7.4985	0	0	0	0	0	6.2987	50.8248	31.7936	6.5987	0.8998	10.7978	0	16.1968	24.2951	2.3995	TCGA-EW-A2FR	BRCA	59	FEMALE	BLACK OR AFRICAN AMERICAN	Stage IIIC	[Not Applicable]	Infiltrating Ductal Carcinoma	[Not Available]	2008	Post (prior bilateral ovariectomy OR >12 mo since LMP with no prior hysterectomy)	-21628	Alive	TUMOR FREE	1673	#N/A	[Not Available]	#N/A	#N/A	#N/A	#N/A	[Not Available]	Negative	#N/A	0	1673	0	1673
TCGA-C8-A137-01A-11R-A115-07	0	0	0	0	0	7.4349	0	0	0	0	1.0621	2.6553	36.6437	8.4971	2.1243	0	5.3107	0	20.1806	4.2485	5.8417	TCGA-C8-A137	BRCA	34	FEMALE	ASIAN	Stage IIB	[Not Applicable]	Infiltrating Ductal Carcinoma	[Not Available]	2010	Pre (<6 months since LMP AND no prior bilateral ovariectomy AND not on estrogen replacement)	-12729	Alive	WITH TUMOR	379	#N/A	[Not Available]	Locoregional Recurrence	#N/A	#N/A	136	[Not Available]	Negative	#N/A	0	379	0	379
TCGA-E9-A1NG-01A-21R-A14M-07	0	0	0	0	0	7.3082	0	0	0	0	0	17.0524	3522.31	10.3532	30.1462	3416.26	0.9135	0	4.5676	5.4811	0.3045	TCGA-E9-A1NG	BRCA	62	FEMALE	WHITE	Stage IIA	[Not Applicable]	Infiltrating Ductal Carcinoma	[Not Available]	2011	Post (prior bilateral ovariectomy OR >12 mo since LMP with no prior hysterectomy)	-22896	Dead	TUMOR FREE	#N/A	786	[Not Available]	#N/A	#N/A	#N/A	#N/A	[Not Available]	Negative	#N/A	1	786	0	786
TCGA-E2-A1LE-01A-12R-A19W-07	0	0	0	0	0	7.1981	0	0	0	0	0	0	0	5.081	0	0	0.8468	0	4.6576	3.3873	4.2342	TCGA-E2-A1LE	BRCA	71	FEMALE	WHITE	Stage IIIC	[Not Applicable]	Infiltrating Ductal Carcinoma	[Not Available]	2008	Post (prior bilateral ovariectomy OR >12 mo since LMP with no prior hysterectomy)	-26239	Dead	WITH TUMOR	#N/A	879	[Not Available]	Distant Metastasis	Lung	#N/A	361	[Not Available]	Negative	#N/A	1	879	1	879
TCGA-B6-A401-01A-11R-A239-07	0	0	0	0	0	6.7841	3.4451	1.0606	4.7896	0	0	0	0.6842	1.7106	0	0	0	0	0.3421	7.5265	18.1321	TCGA-B6-A401	BRCA	47	FEMALE	BLACK OR AFRICAN AMERICAN	Stage IIA	[Not Applicable]	Infiltrating Ductal Carcinoma	[Not Available]	2007	[Unknown]	-17438	Alive	TUMOR FREE	2596	#N/A	[Not Available]	#N/A	#N/A	#N/A	#N/A	[Not Available]	Negative	#N/A	0	2596	0	2596
TCGA-E2-A159-01A-11R-A115-07	0	0	0	0	0	6.7542	1.1072	0	1.068	0	0	0.7143	0.7143	2.5002	0	0	180.73	0	0.7143	25.7166	14.287	TCGA-E2-A159	BRCA	50	FEMALE	WHITE	Stage IIA	[Not Applicable]	Infiltrating Ductal Carcinoma	[Not Available]	2009	Pre (<6 months since LMP AND no prior bilateral ovariectomy AND not on estrogen replacement)	-18621	Alive	TUMOR FREE	762	#N/A	[Not Available]	#N/A	#N/A	#N/A	#N/A	[Not Available]	Negative	#N/A	0	762	0	762
TCGA-AR-A1AO-01A-11R-A12P-07	0	0	0	0	0	6.7351	2.1191	0.9988	0	0	0	6.5708	684.094	6.2423	25.9548	1.9713	32.8542	0	2.6283	89.0349	1.9713	TCGA-AR-A1AO	BRCA	47	FEMALE	WHITE	Stage IIA	[Not Applicable]	Infiltrating Ductal Carcinoma	[Not Available]	2006	Pre (<6 months since LMP AND no prior bilateral ovariectomy AND not on estrogen replacement)	-17332	Alive	TUMOR FREE	2618	#N/A	[Not Available]	#N/A	#N/A	#N/A	#N/A	[Not Available]	Negative	#N/A	0	2618	0	2618
TCGA-C8-A12Z-01A-11R-A115-07	0	0	0	0	0	6.5347	0	0	1.3325	0	0	0.9834	27.0338	0.4917	4.4253	0	0.9834	0	2.9502	6.8838	94.8986	TCGA-C8-A12Z	BRCA	45	FEMALE	ASIAN	Stage IIB	[Not Applicable]	Infiltrating Ductal Carcinoma	[Not Available]	2010	Peri (6-12 months since last menstrual period)	-16508	Alive	TUMOR FREE	382	#N/A	[Not Available]	#N/A	#N/A	#N/A	#N/A	[Not Available]	Negative	#N/A	0	382	0	382
TCGA-A8-A06R-01A-11R-A00Z-07	0	9.7587	0	0	0	6.5058	0	0	0	0	0	0	7.5901	79.5157	0	0	0.3614	0	1.0843	19.5175	38.3121	TCGA-A8-A06R	BRCA	69	FEMALE	[Not Available]	Stage IIB	[Not Applicable]	Infiltrating Ductal Carcinoma	[Not Available]	2007	Post (prior bilateral ovariectomy OR >12 mo since LMP with no prior hysterectomy)	-25477	Alive	TUMOR FREE	547	#N/A	[Not Available]	#N/A	#N/A	#N/A	#N/A	[Not Available]	Negative	#N/A	0	547	0	547
TCGA-BH-A0AU-01A-11R-A12P-07	0	0	0	0	0	6.4982	5.2347	0	0	0	0	4.5126	13.9531	45.1264	1.3538	2.2563	0	1.3538	6.769	18.0505	1.8051	TCGA-BH-A0AU	BRCA	45	FEMALE	WHITE	Stage IIA	[Not Applicable]	Infiltrating Ductal Carcinoma	[Not Available]	2008	Pre (<6 months since LMP AND no prior bilateral ovariectomy AND not on estrogen replacement)	-16688	Alive	TUMOR FREE	1914	#N/A	[Not Available]	#N/A	#N/A	#N/A	#N/A	[Not Available]	Negative	#N/A	0	1914	0	1914
TCGA-AO-A12D-01A-11R-A115-07	0	0	0	0	0	6.2477	0	0	0	0	0	156.674	1213.14	92.2744	259.041	0	3.8448	0.4806	9.1313	2.403	84.1043	TCGA-AO-A12D	BRCA	43	FEMALE	WHITE	Stage IIA	[Not Applicable]	Infiltrating Ductal Carcinoma	[Not Available]	2005	Pre (<6 months since LMP AND no prior bilateral ovariectomy AND not on estrogen replacement)	-15774	Alive	TUMOR FREE	2515	#N/A	[Not Available]	#N/A	#N/A	#N/A	#N/A	[Not Available]	Negative	#N/A	0	2515	0	2515
TCGA-A2-A3XZ-01A-42R-A239-07	0	0	0	0	0	6.2198	0	1.0165	0	0	0	0	9.2557	11.0269	7.2364	19.297	0	0.3446	167.126	83.3908	28.601	TCGA-A2-A3XZ	BRCA	46	FEMALE	BLACK OR AFRICAN AMERICAN	Stage I	[Not Applicable]	Infiltrating Ductal Carcinoma	[Not Available]	2009	Pre (<6 months since LMP AND no prior bilateral ovariectomy AND not on estrogen replacement)	-16978	Alive	TUMOR FREE	1532	#N/A	[Not Available]	#N/A	#N/A	#N/A	#N/A	[Not Available]	Negative	#N/A	0	1532	0	1532
TCGA-BH-A0BR-01A-21R-A115-07	0	0	0	0	0	5.9356	0	0	2.2189	0.4292	0.4292	54.5064	6810.44	326.609	830.472	18.8841	47.6395	0	0.4292	6.0086	3.8627	TCGA-BH-A0BR	BRCA	59	FEMALE	WHITE	Stage I	[Not Applicable]	Infiltrating Ductal Carcinoma	[Not Available]	2007	Post (prior bilateral ovariectomy OR >12 mo since LMP with no prior hysterectomy)	-21622	Alive	TUMOR FREE	2330	#N/A	[Not Available]	#N/A	#N/A	#N/A	#N/A	[Not Available]	Negative	#N/A	0	2330	0	2330
TCGA-A2-A0YG-01A-21R-A109-07	0	0	0	0	0	5.9065	0	0	0	0	0	0.6563	1.6407	7.219	0.9844	1.6407	0.3281	0	4.2658	10.8285	4.2658	TCGA-A2-A0YG	BRCA	63	FEMALE	WHITE	Stage IIIC	[Not Applicable]	Infiltrating Ductal Carcinoma	[Not Available]	2009	Post (prior bilateral ovariectomy OR >12 mo since LMP with no prior hysterectomy)	-23058	Alive	TUMOR FREE	666	#N/A	[Not Available]	#N/A	#N/A	#N/A	#N/A	[Not Available]	Negative	#N/A	0	666	0	666
TCGA-C8-A26Y-01A-11R-A16F-07	0	0	0	0	0	5.8131	0	0	0	0	0	0.306	0.6119	1.8357	0.306	0.306	6.425	0	6.119	557.748	1.8357	TCGA-C8-A26Y	BRCA	90	FEMALE	ASIAN	Stage IIA	[Not Applicable]	Infiltrating Ductal Carcinoma	[Not Available]	2010	Post (prior bilateral ovariectomy OR >12 mo since LMP with no prior hysterectomy)	-32872	Alive	TUMOR FREE	394	#N/A	[Not Available]	#N/A	#N/A	#N/A	#N/A	[Not Available]	Negative	#N/A	0	394	0	394
TCGA-E9-A245-01A-22R-A16F-07	0	1.4538	0.741	0.741	1.482	5.7657	0.741	2.223	5.1941	4.94	0.7057	9.1743	3.5286	23.2886	3.5286	7.0572	1.4114	15.5258	1.4114	2.8229	7.7629	TCGA-E9-A245	BRCA	47	FEMALE	WHITE	Stage IIB	[Not Applicable]	Infiltrating Ductal Carcinoma	[Not Available]	2011	Pre (<6 months since LMP AND no prior bilateral ovariectomy AND not on estrogen replacement)	-17363	Alive	TUMOR FREE	26	#N/A	[Not Available]	#N/A	#N/A	#N/A	#N/A	[Not Available]	Negative	#N/A	0	26	0	26
TCGA-GM-A2DL-01A-11R-A18M-07	0	0	0	0	0	5.6546	0	0	0	0	0	7.0682	9.4243	257.754	2.3561	0.4712	0.9424	0	0.9424	0.4712	11.3091	TCGA-GM-A2DL	BRCA	50	FEMALE	WHITE	Stage I	[Not Applicable]	Infiltrating Ductal Carcinoma	[Not Available]	2003	Peri (6-12 months since last menstrual period)	-18475	Alive	TUMOR FREE	3519	#N/A	[Not Available]	#N/A	#N/A	#N/A	#N/A	[Not Available]	Negative	#N/A	0	3519	0	3519
TCGA-E2-A574-01A-11R-A29R-07	0	0.5612	0	0	0	5.6117	0	0	0	0	0	2.2447	0	0.5612	0	1.6835	84.7363	0	134.68	209.876	33.1089	TCGA-E2-A574	BRCA	44	FEMALE	BLACK OR AFRICAN AMERICAN	Stage IIA	[Not Applicable]	Infiltrating Ductal Carcinoma	[Not Available]	2011	Pre (<6 months since LMP AND no prior bilateral ovariectomy AND not on estrogen replacement)	-16195	Alive	TUMOR FREE	1179	#N/A	[Not Available]	#N/A	#N/A	#N/A	#N/A	[Not Available]	Negative	#N/A	0	1179	0	1179
TCGA-A8-A07F-01A-11R-A00Z-07	0	0	0	0	0	5.2457	0	0	0	2.2087	0	0.2761	0.5522	62.3968	0	0	0.2761	0	4.4175	2.7609	0.5522	TCGA-A8-A07F	BRCA	65	FEMALE	[Not Available]	Stage IIB	[Not Applicable]	Infiltrating Ductal Carcinoma	[Not Available]	2009	Post (prior bilateral ovariectomy OR >12 mo since LMP with no prior hysterectomy)	-23742	Alive	TUMOR FREE	577	#N/A	[Not Available]	#N/A	#N/A	#N/A	#N/A	[Not Available]	Negative	#N/A	0	577	0	577
TCGA-E2-A1LB-01A-11R-A144-07	0	0	0	0	0	5.1758	0	0	5.6071	7.1886	0.4493	476.244	15608.9	151.859	14153.4	0.8986	60.6537	11.6815	4950.69	1.3479	2.6957	TCGA-E2-A1LB	BRCA	41	FEMALE	BLACK OR AFRICAN AMERICAN	Stage IIB	[Not Applicable]	Infiltrating Ductal Carcinoma	[Not Available]	2008	Pre (<6 months since LMP AND no prior bilateral ovariectomy AND not on estrogen replacement)	-15283	Alive	TUMOR FREE	2306	#N/A	[Not Available]	#N/A	#N/A	#N/A	#N/A	[Not Available]	Negative	#N/A	0	2306	0	2306
TCGA-EW-A6SD-01A-12R-A33J-07	0	0	0	0	0	4.9942	1.2905	0	0	0	0	3.3518	122.749	49.8586	1.2569	0	5.0278	0.419	162.983	6.2847	8.3796	TCGA-EW-A6SD	BRCA	32	FEMALE	BLACK OR AFRICAN AMERICAN	Stage IIB	[Not Applicable]	Infiltrating Ductal Carcinoma	[Not Available]	2012	[Not Available]	-12006	Alive	TUMOR FREE	1010	#N/A	[Not Available]	#N/A	#N/A	#N/A	#N/A	[Not Available]	Negative	#N/A	0	1010	0	1010
TCGA-C8-A12Y-01A-11R-A12D-07	0	0	0	0	0	4.971	0	0	0	0	0	0	0	3.314	0	2.7617	1.3808	2.2093	7.4565	0	2.4855	TCGA-C8-A12Y	BRCA	44	FEMALE	ASIAN	Stage IIB	[Not Applicable]	Infiltrating Ductal Carcinoma	[Not Available]	2010	Pre (<6 months since LMP AND no prior bilateral ovariectomy AND not on estrogen replacement)	#N/A	Alive	TUMOR FREE	1476	#N/A	[Not Available]	#N/A	#N/A	#N/A	#N/A	[Not Available]	Negative	#N/A	0	1476	0	1476
TCGA-C8-A1HF-01A-11R-A137-07	0	0	0	0	0	4.9391	1.2979	0	0	0	0	0	0.297	2.97	0.891	1.485	0.594	0	59.9941	73.6561	13.662	TCGA-C8-A1HF	BRCA	48	FEMALE	ASIAN	Stage IIA	[Not Applicable]	Infiltrating Ductal Carcinoma	[Not Available]	2010	Pre (<6 months since LMP AND no prior bilateral ovariectomy AND not on estrogen replacement)	#N/A	Alive	TUMOR FREE	332	#N/A	[Not Available]	#N/A	#N/A	#N/A	#N/A	[Not Available]	Negative	#N/A	0	332	0	332
TCGA-C8-A135-01A-11R-A115-07	0	0.4839	0	0	0	4.8756	11.2765	0	2.7235	0	1.3825	196.774	26156.8	88.4793	2958.99	0.4608	23.0415	0.4608	172.811	23.5023	1.3825	TCGA-C8-A135	BRCA	64	FEMALE	ASIAN	Stage IIB	[Not Applicable]	Infiltrating Ductal Carcinoma	[Not Available]	2010	Post (prior bilateral ovariectomy OR >12 mo since LMP with no prior hysterectomy)	-23667	Alive	TUMOR FREE	393	#N/A	[Not Available]	#N/A	#N/A	#N/A	#N/A	[Not Available]	Negative	#N/A	0	393	0	393
TCGA-E2-A15K-01A-11R-A12P-07	0	0	0	0	0	4.7651	1.3587	0	0	0.3827	0	0	0.7655	1.531	1.531	2.6792	0	0	2.6792	4.5929	4.5929	TCGA-E2-A15K	BRCA	58	FEMALE	WHITE	Stage IIB	[Not Applicable]	Infiltrating Ductal Carcinoma	[Not Available]	2010	Post (prior bilateral ovariectomy OR >12 mo since LMP with no prior hysterectomy)	-21514	Alive	TUMOR FREE	275	#N/A	[Not Available]	#N/A	#N/A	#N/A	#N/A	[Not Available]	Negative	#N/A	0	275	0	275
TCGA-AC-A5EH-01A-11R-A28M-07	0	0.8247	0	0	0	4.7505	3.9093	0	0	0	0	11.9588	2577.64	2.0619	212.371	0	0	0	1.2371	11.5464	12.3711	TCGA-AC-A5EH	BRCA	76	FEMALE	BLACK OR AFRICAN AMERICAN	Stage IIB	[Not Applicable]	Infiltrating Ductal Carcinoma	[Not Available]	2012	[Not Available]	-27964	Alive	TUMOR FREE	511	#N/A	[Not Available]	#N/A	#N/A	#N/A	#N/A	[Not Available]	Negative	#N/A	0	511	0	511
TCGA-A2-A04P-01A-31R-A034-07	0	0.5187	0	0	0	4.7095	0	2.0332	0	0	0	1.556	0	23.3402	2.5934	0	677.386	0	0	249.481	50.3112	TCGA-A2-A04P	BRCA	36	FEMALE	BLACK OR AFRICAN AMERICAN	Stage IIIC	[Not Applicable]	Infiltrating Ductal Carcinoma	[Not Available]	2003	Pre (<6 months since LMP AND no prior bilateral ovariectomy AND not on estrogen replacement)	-13238	Dead	WITH TUMOR	#N/A	548	[Not Available]	Distant Metastasis	Bone	#N/A	102	[Not Available]	Positive	#N/A	1	548	1	548
TCGA-BH-A0H9-01A-11R-A056-07	0	0	0	0	0	4.6916	0	0	0	0	0	0.7819	75.7384	14.0749	10.5562	6.2555	0.391	0.391	0.7819	8.9923	26.5859	TCGA-BH-A0H9	BRCA	69	FEMALE	WHITE	Stage IIA	[Not Applicable]	Infiltrating Ductal Carcinoma	[Not Available]	2007	Post (prior bilateral ovariectomy OR >12 mo since LMP with no prior hysterectomy)	-25289	Alive	TUMOR FREE	1247	#N/A	[Not Available]	#N/A	#N/A	#N/A	#N/A	[Not Available]	Negative	#N/A	0	1247	0	1247
TCGA-A2-A04U-01A-11R-A115-07	0	0	0	0	0	4.6759	0	0	0	0	0	0	0	0	0	0	0	0.5195	5.1955	910.248	36.3684	TCGA-A2-A04U	BRCA	47	FEMALE	WHITE	Stage IIA	[Not Applicable]	Infiltrating Ductal Carcinoma	[Not Available]	2004	Peri (6-12 months since last menstrual period)	-17474	Alive	TUMOR FREE	2654	#N/A	[Not Available]	#N/A	#N/A	#N/A	#N/A	[Not Available]	Negative	#N/A	0	2654	0	2654
TCGA-GM-A3XL-01A-11R-A22U-07	0	0	0	0	0	4.4998	0	0	0	0	0	0.6923	3.8075	0	6.2305	0	0.3461	0.3461	3.4614	221.53	40.8446	TCGA-GM-A3XL	BRCA	49	FEMALE	BLACK OR AFRICAN AMERICAN	Stage IIA	[Not Applicable]	Infiltrating Ductal Carcinoma	[Not Available]	2007	Post (prior bilateral ovariectomy OR >12 mo since LMP with no prior hysterectomy)	-18171	Alive	TUMOR FREE	2108	#N/A	[Not Available]	#N/A	#N/A	#N/A	#N/A	[Not Available]	Negative	#N/A	0	2108	0	2108
TCGA-A2-A0EY-01A-11R-A034-07	0	1.1526	0	0	0	4.4566	2.1954	0	1.7124	0.7318	0	53.0553	519.821	190.999	64.3981	0	113.063	0	0	5.8544	51.5917	TCGA-A2-A0EY	BRCA	62	FEMALE	WHITE	Stage IIB	[Not Applicable]	Infiltrating Ductal Carcinoma	[Not Available]	2009	Post (prior bilateral ovariectomy OR >12 mo since LMP with no prior hysterectomy)	-22872	Alive	TUMOR FREE	1925	#N/A	[Not Available]	#N/A	#N/A	#N/A	#N/A	[Not Available]	Negative	#N/A	0	1925	0	1925
TCGA-PL-A8LZ-01A-31R-A36F-07	0	0	0	0	0	4.2703	0	0	0	0	0	1.7081	0.427	0.427	0.427	2.9892	74.7304	0	18.3623	375.36	16.6542	TCGA-PL-A8LZ	BRCA	29	FEMALE	BLACK OR AFRICAN AMERICAN	Stage IIIB	[Not Applicable]	Infiltrating Ductal Carcinoma	[Not Available]	2013	Pre (<6 months since LMP AND no prior bilateral ovariectomy AND not on estrogen replacement)	-10869	Alive	TUMOR FREE	302	#N/A	[Not Available]	#N/A	#N/A	#N/A	#N/A	[Not Available]	[Not Available]	#N/A	0	302	0	302
TCGA-OL-A5RZ-01A-11R-A28M-07	0	0.5269	0	0	0	4.2404	0	4.4399	0	0	0	0	1.023	0	2.5575	1.023	0	0.5115	15.8568	0.5115	8.6957	TCGA-OL-A5RZ	BRCA	57	FEMALE	BLACK OR AFRICAN AMERICAN	Stage IA	[Not Applicable]	Infiltrating Ductal Carcinoma	[Not Available]	2012	Post (prior bilateral ovariectomy OR >12 mo since LMP with no prior hysterectomy)	-21038	Alive	TUMOR FREE	679	#N/A	[Not Available]	#N/A	#N/A	#N/A	#N/A	[Not Available]	Negative	#N/A	0	679	0	679
TCGA-LL-A8F5-01A-11R-A36F-07	0	0	0	0	0	4.1973	0	0	0	0	0	0.5247	0	0	0	0	0	0	18.8877	198.321	22.5603	TCGA-LL-A8F5	BRCA	61	FEMALE	BLACK OR AFRICAN AMERICAN	Stage IIA	[Not Applicable]	Infiltrating Ductal Carcinoma	[Not Available]	2013	Post (prior bilateral ovariectomy OR >12 mo since LMP with no prior hysterectomy)	-22544	Alive	TUMOR FREE	596	#N/A	[Not Available]	#N/A	#N/A	#N/A	#N/A	[Not Available]	Negative	#N/A	0	596	0	596
TCGA-D8-A1XB-01A-11R-A14D-07	0	0.4847	0	0	0	4.0878	0	0	0	0	0	0	0.4572	11.4312	0	0	0	0	10.0594	26.5203	3.658	TCGA-D8-A1XB	BRCA	62	FEMALE	WHITE	Stage IIB	[Not Applicable]	Infiltrating Ductal Carcinoma	[Not Available]	2010	Post (prior bilateral ovariectomy OR >12 mo since LMP with no prior hysterectomy)	-22976	Alive	TUMOR FREE	552	#N/A	[Not Available]	#N/A	#N/A	#N/A	#N/A	[Not Available]	Negative	#N/A	0	552	0	552
TCGA-E2-A15E-01A-11R-A12D-07	0	0	0	0	0	4.0486	0	0	0	0	0	45.5466	4642.14	31.3765	3328.44	0	7.5911	0	9.6154	55.668	5.5668	TCGA-E2-A15E	BRCA	40	FEMALE	WHITE	Stage IIA	[Not Applicable]	Infiltrating Ductal Carcinoma	[Not Available]	2009	Pre (<6 months since LMP AND no prior bilateral ovariectomy AND not on estrogen replacement)	-14894	Alive	TUMOR FREE	630	#N/A	[Not Available]	#N/A	#N/A	#N/A	#N/A	[Not Available]	Negative	#N/A	0	630	0	630
TCGA-AC-A62V-01A-11R-A31O-07	0	0	0	0	0	4.0062	0	0	2.65	0	0	0.416	7.4883	21.2168	1.248	6.6563	2.0801	0	0.832	0	27.8731	TCGA-AC-A62V	BRCA	58	MALE	BLACK OR AFRICAN AMERICAN	Stage IV	[Not Applicable]	Infiltrating Ductal Carcinoma	[Not Available]	2013	[Not Evaluated]	-21389	Dead	WITH TUMOR	#N/A	348	[Not Available]	#N/A	#N/A	#N/A	#N/A	[Not Available]	Negative	#N/A	1	348	1	348
TCGA-B6-A0RT-01A-21R-A084-07	0	0	0	0	0	3.9103	0	0	0.8584	0	0	0	6.9941	1.9075	0	0	0.6358	0	4.1329	38.4677	8.5837	TCGA-B6-A0RT	BRCA	39	FEMALE	WHITE	Stage IIIA	[Not Applicable]	Infiltrating Ductal Carcinoma	[Not Available]	1996	Indeterminate (neither Pre or Postmenopausal)	-14374	Alive	TUMOR FREE	2721	#N/A	[Not Available]	#N/A	#N/A	#N/A	#N/A	[Not Available]	Close	#N/A	0	2721	0	2721
TCGA-E9-A1R7-01A-11R-A14M-07	0	0	0	0	0	3.8705	0	0	0	0	0	0	0.3519	1.0556	0	0	0	0	0	10.2041	1.4075	TCGA-E9-A1R7	BRCA	64	FEMALE	WHITE	Stage IIA	[Not Applicable]	Infiltrating Ductal Carcinoma	[Not Available]	2011	Post (prior bilateral ovariectomy OR >12 mo since LMP with no prior hysterectomy)	-23397	Alive	TUMOR FREE	1467	#N/A	[Not Available]	#N/A	#N/A	#N/A	#N/A	[Not Available]	Negative	#N/A	0	1467	0	1467
TCGA-E2-A1L9-01A-11R-A13Q-07	0	0	0	0	0	3.7726	0	0	0	0	0	12.3956	32.0291	1488.82	0.5389	0	0.8084	0.2695	1.0779	7.0062	6.1978	TCGA-E2-A1L9	BRCA	40	FEMALE	WHITE	Stage IIA	[Not Applicable]	Infiltrating Ductal Carcinoma	[Not Available]	2009	Pre (<6 months since LMP AND no prior bilateral ovariectomy AND not on estrogen replacement)	-14868	Alive	TUMOR FREE	598	#N/A	[Not Available]	#N/A	#N/A	#N/A	#N/A	[Not Available]	Negative	#N/A	0	598	0	598
TCGA-A8-A095-01A-11R-A00Z-07	0	0	0	0	0	3.7685	0	0	0	0	0	0	14.7109	14.7314	1.713	1.3704	3.7685	0.3426	2.0555	15.7592	13.0185	TCGA-A8-A095	BRCA	45	FEMALE	[Not Available]	Stage I	[Not Applicable]	Infiltrating Ductal Carcinoma	[Not Available]	2007	Pre (<6 months since LMP AND no prior bilateral ovariectomy AND not on estrogen replacement)	-16742	Alive	TUMOR FREE	1277	#N/A	[Not Available]	#N/A	#N/A	#N/A	#N/A	[Not Available]	Negative	#N/A	0	1277	0	1277
TCGA-LL-A7T0-01A-31R-A352-07	0	0	0	0	0	3.7665	0	0	0	0	0	0.4708	0	6.5913	0	0.4708	0.4708	2.354	23.0697	1.4124	34.3691	TCGA-LL-A7T0	BRCA	70	FEMALE	BLACK OR AFRICAN AMERICAN	Stage IIB	[Not Applicable]	Infiltrating Ductal Carcinoma	[Not Available]	2013	Post (prior bilateral ovariectomy OR >12 mo since LMP with no prior hysterectomy)	-25867	Alive	TUMOR FREE	376	#N/A	[Not Available]	#N/A	#N/A	#N/A	#N/A	[Not Available]	Negative	#N/A	0	376	0	376
TCGA-D8-A1Y1-01A-21R-A14M-07	0	0	0	0	0	3.7363	0	0	0	0.5338	0	0.8006	5.8446	13.6107	0.8006	0.5338	0	0	2.135	7.7394	1.6013	TCGA-D8-A1Y1	BRCA	80	FEMALE	WHITE	Stage IIIA	[Not Applicable]	Infiltrating Ductal Carcinoma	[Not Available]	2010	Post (prior bilateral ovariectomy OR >12 mo since LMP with no prior hysterectomy)	-29474	Dead	WITH TUMOR	#N/A	302	[Not Available]	#N/A	#N/A	#N/A	#N/A	[Not Available]	[Not Available]	#N/A	1	302	1	302
TCGA-E9-A1R4-01A-21R-A14D-07	0	0	0	0	0	3.5767	0	0	0	0	0	0	0.7948	0.7948	1.1922	0	0.3974	0	23.4474	0.3974	5.1664	TCGA-E9-A1R4	BRCA	66	FEMALE	WHITE	Stage IA	[Not Applicable]	Infiltrating Ductal Carcinoma	[Not Available]	2011	Post (prior bilateral ovariectomy OR >12 mo since LMP with no prior hysterectomy)	-24181	Alive	TUMOR FREE	186	#N/A	[Not Available]	#N/A	#N/A	#N/A	#N/A	[Not Available]	Negative	#N/A	0	186	0	186
TCGA-BH-A0BP-01A-11R-A115-07	0	0.6269	0	0	0	3.3852	0	0	0	0	0.5015	2.5075	2.006	168.506	0	9.0271	0.5015	0	2.006	26.0782	5.015	TCGA-BH-A0BP	BRCA	76	FEMALE	WHITE	Stage I	[Not Applicable]	Infiltrating Ductal Carcinoma	[Not Available]	2006	Post (prior bilateral ovariectomy OR >12 mo since LMP with no prior hysterectomy)	-27917	Dead	TUMOR FREE	#N/A	2296	[Not Available]	#N/A	#N/A	#N/A	#N/A	[Not Available]	Negative	#N/A	1	2296	0	2296
TCGA-E2-A10C-01A-21R-A10J-07	0	0	0	0	0	3.3302	0	0	0	0	0.4757	171.266	11.8696	488.582	0	0	69.9334	0	3.3302	2.3787	27.5928	TCGA-E2-A10C	BRCA	54	FEMALE	WHITE	Stage IIB	[Not Applicable]	Infiltrating Ductal Carcinoma	[Not Available]	2008	Post (prior bilateral ovariectomy OR >12 mo since LMP with no prior hysterectomy)	-19849	Alive	TUMOR FREE	1220	#N/A	[Not Available]	#N/A	#N/A	#N/A	#N/A	[Not Available]	Negative	#N/A	0	1220	0	1220
TCGA-AO-A0JA-01A-11R-A056-07	0	0	0	0	0	3.1774	0	0	0	0	0	0	0.7061	4.5896	1.0591	2.1183	0	0.353	9.1792	11.2974	4.2365	TCGA-AO-A0JA	BRCA	36	FEMALE	BLACK OR AFRICAN AMERICAN	Stage IIIC	[Not Applicable]	Infiltrating Ductal Carcinoma	[Not Available]	2009	Pre (<6 months since LMP AND no prior bilateral ovariectomy AND not on estrogen replacement)	-13307	Alive	WITH TUMOR	655	#N/A	[Not Available]	Distant Metastasis	Bone	#N/A	143	[Not Available]	Negative	#N/A	0	655	0	655
TCGA-EW-A1OV-01A-11R-A144-07	0	0	0	0	0	3.1646	0	0	0	0	0	0	0	8.4388	0	0	0	2.1097	62.2363	16.3502	12.6582	TCGA-EW-A1OV	BRCA	56	FEMALE	WHITE	Stage IIB	[Not Applicable]	Infiltrating Ductal Carcinoma	[Not Available]	2009	Post (prior bilateral ovariectomy OR >12 mo since LMP with no prior hysterectomy)	-20764	Alive	TUMOR FREE	789	#N/A	[Not Available]	#N/A	#N/A	#N/A	#N/A	[Not Available]	Negative	#N/A	0	789	0	789
TCGA-A2-A0T2-01A-11R-A084-07	0	0	0	0	0	3.1208	0	0	0	0	0	0	0.4458	0	0	0	12.4833	0	0.8917	59.7414	5.7958	TCGA-A2-A0T2	BRCA	66	FEMALE	WHITE	Stage IV	[Not Applicable]	Infiltrating Ductal Carcinoma	[Not Available]	2009	Post (prior bilateral ovariectomy OR >12 mo since LMP with no prior hysterectomy)	-24235	Dead	WITH TUMOR	#N/A	255	[Not Available]	#N/A	#N/A	#N/A	#N/A	[Not Available]	Close	#N/A	1	255	1	255
TCGA-C8-A12L-01A-11R-A115-07	0	0.459	0	0	0	3.1144	6.9727	2.2042	2.683	0	0	16.2248	2187.17	48.2786	9.8932	0.3957	27.3051	0	0.3957	239.81	7.1231	TCGA-C8-A12L	BRCA	67	FEMALE	ASIAN	Stage IIA	[Not Applicable]	Infiltrating Ductal Carcinoma	[Not Available]	2010	Post (prior bilateral ovariectomy OR >12 mo since LMP with no prior hysterectomy)	-24710	Alive	TUMOR FREE	363	#N/A	[Not Available]	#N/A	#N/A	#N/A	#N/A	[Not Available]	Negative	#N/A	0	363	0	363
TCGA-A8-A07I-01A-11R-A00Z-07	0	0	0	0	0	3.0868	0	0	0	0	0	0	4.4097	12.347	1.3229	1.3229	0	1.3229	0	1.3229	0.441	TCGA-A8-A07I	BRCA	69	FEMALE	[Not Available]	Stage IIIA	[Not Applicable]	Infiltrating Ductal Carcinoma	[Not Available]	2009	Post (prior bilateral ovariectomy OR >12 mo since LMP with no prior hysterectomy)	-25263	Alive	TUMOR FREE	426	#N/A	[Not Available]	#N/A	#N/A	#N/A	#N/A	[Not Available]	Negative	#N/A	0	426	0	426
TCGA-A8-A08X-01A-21R-A00Z-07	0	0	0	0	0	3.0028	0	0	0	0	0	1.8017	114.959	17.4162	40.8381	0	13.2123	0	13.8129	1.8017	6.0056	TCGA-A8-A08X	BRCA	43	FEMALE	[Not Available]	Stage IIIC	[Not Applicable]	Infiltrating Ductal Carcinoma	[Not Available]	2007	Pre (<6 months since LMP AND no prior bilateral ovariectomy AND not on estrogen replacement)	-15705	Alive	TUMOR FREE	1308	#N/A	[Not Available]	#N/A	#N/A	#N/A	366	[Not Available]	Negative	#N/A	0	1308	0	1308
TCGA-GM-A2DC-01A-11R-A18M-07	0	0	0	0	0	2.9928	0	0	1.9313	0	0.5471	0	0	0	0	0	0.5471	1.0942	0.5471	0.5471	13.1309	TCGA-GM-A2DC	BRCA	57	FEMALE	WHITE	Stage IIA	[Not Applicable]	Infiltrating Ductal Carcinoma	[Not Available]	2006	Post (prior bilateral ovariectomy OR >12 mo since LMP with no prior hysterectomy)	-21122	Alive	TUMOR FREE	2535	#N/A	[Not Available]	#N/A	#N/A	#N/A	#N/A	[Not Available]	Negative	#N/A	0	2535	0	2535
TCGA-BH-A1ES-01A-11R-A137-07	0	0	0	0	0	2.9754	0	5.2213	0	0	0	0.8197	31.9672	79.5082	0	0.8197	0	0	2.459	6.5574	0.8197	TCGA-BH-A1ES	BRCA	35	FEMALE	WHITE	Stage IIB	[Not Applicable]	Infiltrating Ductal Carcinoma	[Not Available]	1999	Pre (<6 months since LMP AND no prior bilateral ovariectomy AND not on estrogen replacement)	-13138	Dead	WITH TUMOR	#N/A	3462	[Not Available]	#N/A	#N/A	#N/A	#N/A	[Not Available]	[Not Available]	#N/A	1	3462	1	3462
TCGA-BH-A18M-01A-11R-A12D-07	0	0	0	0	0	2.9752	1.0652	0	0	0	0	0	1.8366	2.5712	1.4692	2.2039	0	0	13.9579	14.3252	2.2039	TCGA-BH-A18M	BRCA	39	FEMALE	WHITE	Stage IIIA	[Not Applicable]	Infiltrating Ductal Carcinoma	[Not Available]	2001	[Not Available]	-14532	Dead	#N/A	#N/A	2207	[Not Available]	#N/A	#N/A	#N/A	#N/A	[Not Available]	Negative	#N/A	1	2207	#N/A	2207
TCGA-A2-A0D3-01A-11R-A115-07	0	0	0	0	0	2.9018	0	0	0	0	1.2897	0	0.3224	9.3503	0.9673	0	0	0	0.6448	3.8691	6.1261	TCGA-A2-A0D3	BRCA	42	FEMALE	WHITE	Stage IA	[Not Applicable]	Infiltrating Ductal Carcinoma	[Not Available]	2008	Post (prior bilateral ovariectomy OR >12 mo since LMP with no prior hysterectomy)	-15524	Alive	TUMOR FREE	1873	#N/A	[Not Available]	#N/A	#N/A	#N/A	#N/A	[Not Available]	Negative	#N/A	0	1873	0	1873
TCGA-3C-AALK-01A-11R-A41B-07	0	0	0	0	0	2.8962	0	0	0	0.4137	0	3.7236	709.003	212.66	215.97	0	7.4472	0.4137	30.2027	15.3082	16.9632	TCGA-3C-AALK	BRCA	52	FEMALE	BLACK OR AFRICAN AMERICAN	Stage IA	[Not Applicable]	Infiltrating Ductal Carcinoma	[Not Available]	2011	[Unknown]	-19074	Alive	TUMOR FREE	1448	#N/A	[Not Available]	#N/A	#N/A	#N/A	#N/A	[Not Available]	Close	#N/A	0	1448	0	1448
TCGA-EW-A1OW-01A-21R-A144-07	0	0	0	0	0	2.8794	0	0	0	0	0	0	0	0.9598	0	0	18.2364	0	5.7588	1402.28	9.1182	TCGA-EW-A1OW	BRCA	58	FEMALE	BLACK OR AFRICAN AMERICAN	Stage IIA	[Not Applicable]	Infiltrating Ductal Carcinoma	[Not Available]	2009	Post (prior bilateral ovariectomy OR >12 mo since LMP with no prior hysterectomy)	-21465	Alive	TUMOR FREE	694	#N/A	[Not Available]	#N/A	#N/A	#N/A	#N/A	[Not Available]	Negative	#N/A	0	694	0	694
TCGA-BH-A0E0-01A-11R-A056-07	0	0	0	0	0	2.8519	5.0701	0	0	14.0158	0	0	1.2188	1.2188	0.6094	7.922	0	0	0.6094	21.9378	17.6722	TCGA-BH-A0E0	BRCA	38	FEMALE	WHITE	Stage IIIC	[Not Applicable]	Infiltrating Ductal Carcinoma	[Not Available]	2009	Pre (<6 months since LMP AND no prior bilateral ovariectomy AND not on estrogen replacement)	-14175	Alive	TUMOR FREE	134	#N/A	[Not Available]	#N/A	#N/A	#N/A	#N/A	[Not Available]	Negative	#N/A	0	134	0	134
TCGA-A1-A0SM-01A-11R-A084-07	0	0	0	0	0	2.8409	0	0	0	0	0	83.0177	17371.4	73.8636	217.803	29.0404	0	0.6313	1.8939	14.8359	1.8939	TCGA-A1-A0SM	BRCA	77	MALE	WHITE	Stage IIA	[Not Applicable]	Infiltrating Ductal Carcinoma	[Not Available]	2007	[Not Available]	-28198	Alive	TUMOR FREE	242	#N/A	[Not Available]	#N/A	#N/A	#N/A	#N/A	[Not Available]	Negative	#N/A	0	242	0	242
TCGA-B6-A0I2-01A-11R-A034-07	0	0	0	0	0	2.7057	0	0	0	0	0.451	0	0	0	0	0	7.6663	0	0.9019	295.378	71.2514	TCGA-B6-A0I2	BRCA	45	FEMALE	WHITE	Stage IA	[Not Applicable]	Infiltrating Ductal Carcinoma	[Not Available]	1995	Indeterminate (neither Pre or Postmenopausal)	-16702	Alive	TUMOR FREE	4361	#N/A	[Not Available]	#N/A	#N/A	#N/A	#N/A	[Not Available]	[Not Available]	#N/A	0	4361	0	4361
TCGA-E9-A1R3-01A-31R-A14M-07	0	0.273	0	0	0	2.6904	0	0	1.7961	1.002	0.2505	2.505	157.107	13.5271	1.002	0	1.2525	0	1.2525	9.018	1.503	TCGA-E9-A1R3	BRCA	70	FEMALE	WHITE	Stage IIIC	[Not Applicable]	Infiltrating Ductal Carcinoma	[Not Available]	2010	Post (prior bilateral ovariectomy OR >12 mo since LMP with no prior hysterectomy)	-25693	Alive	TUMOR FREE	78	#N/A	[Not Available]	#N/A	#N/A	#N/A	#N/A	[Not Available]	Negative	#N/A	0	78	0	78
TCGA-AO-A1KR-01A-12R-A144-07	0	2.0067	0	0	0	2.6756	0	0	0	1.3378	0	0	0	0	0	0	6.0201	0	3.3445	156.522	68.8963	TCGA-AO-A1KR	BRCA	51	FEMALE	WHITE	Stage IIA	[Not Applicable]	Infiltrating Ductal Carcinoma	[Not Available]	2005	Pre (<6 months since LMP AND no prior bilateral ovariectomy AND not on estrogen replacement)	-18900	Alive	TUMOR FREE	2513	#N/A	[Not Available]	#N/A	#N/A	#N/A	#N/A	[Not Available]	Negative	#N/A	0	2513	0	2513
TCGA-D8-A27L-01A-11R-A16F-07	0	0.3358	0	0	0	2.6428	0	0	0	0.2708	0.2708	0.5416	102.727	26.2659	8.3943	0.8123	0.5416	0.8123	1.3539	17.8716	1.3539	TCGA-D8-A27L	BRCA	49	FEMALE	WHITE	Stage IIIA	[Not Applicable]	Infiltrating Ductal Carcinoma	[Not Available]	2011	Post (prior bilateral ovariectomy OR >12 mo since LMP with no prior hysterectomy)	-18025	Alive	TUMOR FREE	499	#N/A	[Not Available]	#N/A	#N/A	#N/A	#N/A	[Not Available]	Negative	#N/A	0	499	0	499
TCGA-B6-A0WZ-01A-11R-A109-07	0	0	0	0	0	2.5337	0	0	0	0	0	0	13.7544	7.9631	2.1717	0	0	0	6.8772	0.362	12.3066	TCGA-B6-A0WZ	BRCA	50	FEMALE	BLACK OR AFRICAN AMERICAN	Stage II	[Not Applicable]	Infiltrating Ductal Carcinoma	[Not Available]	1996	Indeterminate (neither Pre or Postmenopausal)	-18584	Alive	TUMOR FREE	6292	#N/A	[Not Available]	New Primary Tumor	Bone	#N/A	5117	[Not Available]	Negative	#N/A	0	6292	0	6292
TCGA-E2-A1LS-01A-12R-A157-07	0	0	0	0	0	2.5025	0	0	0	0	0	0	0.5005	1.5015	0	0	22.5225	0	0	703.203	4.004	TCGA-E2-A1LS	BRCA	46	FEMALE	WHITE	Stage IA	[Not Applicable]	Infiltrating Ductal Carcinoma	[Not Available]	2010	Pre (<6 months since LMP AND no prior bilateral ovariectomy AND not on estrogen replacement)	-16887	Alive	TUMOR FREE	1604	#N/A	[Not Available]	#N/A	#N/A	#N/A	#N/A	[Not Available]	Negative	#N/A	0	1604	0	1604
TCGA-D8-A1JL-01A-11R-A13Q-07	0	0	0	0	0	2.4861	0.6918	0	0	0	0	0.2445	0.4889	0	0	0	61.3579	0	12.4672	101.937	6.1113	TCGA-D8-A1JL	BRCA	72	FEMALE	WHITE	Stage IIA	[Not Applicable]	Infiltrating Ductal Carcinoma	[Not Available]	2010	Post (prior bilateral ovariectomy OR >12 mo since LMP with no prior hysterectomy)	-26484	Alive	TUMOR FREE	611	#N/A	[Not Available]	#N/A	#N/A	#N/A	#N/A	[Not Available]	Negative	#N/A	0	611	0	611
TCGA-BH-A0B0-01A-21R-A115-07	0	0	0	0	0	2.4783	0	0	0	0	2.8914	0	26.0223	1.6522	9.0872	4.5436	3.3044	0	29.3267	9.9133	1.2392	TCGA-BH-A0B0	BRCA	56	FEMALE	BLACK OR AFRICAN AMERICAN	Stage I	[Not Applicable]	Infiltrating Ductal Carcinoma	[Not Available]	2006	Peri (6-12 months since last menstrual period)	-20776	Alive	TUMOR FREE	2477	#N/A	[Not Available]	#N/A	#N/A	#N/A	#N/A	[Not Available]	Negative	#N/A	0	2477	0	2477
TCGA-D8-A1J8-01A-11R-A13Q-07	0	0	0	0	0	2.4651	0	0	0	0.8217	2.1912	141.605	22615.9	957.272	435.223	746.645	3.2868	0	4.6563	1.3695	0.2739	TCGA-D8-A1J8	BRCA	77	FEMALE	WHITE	Stage IIB	[Not Applicable]	Infiltrating Ductal Carcinoma	[Not Available]	2010	Post (prior bilateral ovariectomy OR >12 mo since LMP with no prior hysterectomy)	-28444	Alive	TUMOR FREE	431	#N/A	[Not Available]	#N/A	#N/A	#N/A	#N/A	[Not Available]	Negative	#N/A	0	431	0	431
TCGA-D8-A27M-01A-11R-A16F-07	0	0	0	10.468	0.9236	2.4631	0.3079	0	0	0	0	0.6158	0	1.8473	0	0.9236	76.3547	0	0.3079	628.079	16.6256	TCGA-D8-A27M	BRCA	59	FEMALE	WHITE	Stage IA	[Not Applicable]	Infiltrating Ductal Carcinoma	[Not Available]	2011	Post (prior bilateral ovariectomy OR >12 mo since LMP with no prior hysterectomy)	-21910	Alive	TUMOR FREE	410	#N/A	[Not Available]	#N/A	#N/A	#N/A	#N/A	[Not Available]	Negative	#N/A	0	410	0	410
TCGA-A2-A0T7-01A-21R-A084-07	0	0.8666	0	0	0	2.311	0	0	0	0	0	0	6.0663	16.7545	4.3331	0	2.8887	0	4.0442	45.6417	0.8666	TCGA-A2-A0T7	BRCA	51	FEMALE	WHITE	Stage IIA	[Not Applicable]	Infiltrating Ductal Carcinoma	[Not Available]	2009	Pre (<6 months since LMP AND no prior bilateral ovariectomy AND not on estrogen replacement)	-18756	Alive	TUMOR FREE	631	#N/A	[Not Available]	#N/A	#N/A	#N/A	#N/A	[Not Available]	Negative	#N/A	0	631	0	631
TCGA-C8-A275-01A-21R-A16F-07	0	0	0	0	0	2.2212	0	0	2.7802	0	0	0.2942	43.2127	3.5305	12.3566	0	88.2613	0	143.572	10.5914	3.2362	TCGA-C8-A275	BRCA	56	FEMALE	ASIAN	Stage IIA	[Not Applicable]	Infiltrating Ductal Carcinoma	[Not Available]	2010	Post (prior bilateral ovariectomy OR >12 mo since LMP with no prior hysterectomy)	-20774	Alive	TUMOR FREE	1	#N/A	[Not Available]	#N/A	#N/A	#N/A	#N/A	[Not Available]	Negative	#N/A	0	1	0	1
TCGA-A2-A0D4-01A-11R-A00Z-07	0	0	0	0	0	2.1699	0	0	2.6225	0	0	0	0.5325	0	2.3962	0.5325	0.5325	0.7987	4.26	2.13	2.13	TCGA-A2-A0D4	BRCA	37	FEMALE	BLACK OR AFRICAN AMERICAN	Stage IIB	[Not Applicable]	Infiltrating Ductal Carcinoma	[Not Available]	2009	Pre (<6 months since LMP AND no prior bilateral ovariectomy AND not on estrogen replacement)	-13805	Alive	TUMOR FREE	767	#N/A	[Not Available]	#N/A	#N/A	#N/A	#N/A	[Not Available]	Negative	#N/A	0	767	0	767
TCGA-BH-A18Q-01A-12R-A12D-07	0	0	0	0	0	2.118	0	0	0	0	0.4236	0	19.049	9.7427	2.9652	0.4236	22.4505	0	0	285.926	11.0134	TCGA-BH-A18Q	BRCA	56	FEMALE	WHITE	Stage IIB	[Not Applicable]	Infiltrating Ductal Carcinoma	[Not Available]	2001	[Not Available]	-20675	Dead	#N/A	#N/A	1692	[Not Available]	#N/A	#N/A	#N/A	#N/A	[Not Available]	Negative	#N/A	1	1692	#N/A	1692
TCGA-BH-A0W7-01A-11R-A115-07	0	0	0	0	0	2.0544	0	0	0	0	0	3.287	135.151	20.544	1.6435	0	0.8218	0.4109	5.3414	6.985	7.8067	TCGA-BH-A0W7	BRCA	49	FEMALE	WHITE	Stage I	[Not Applicable]	Infiltrating Ductal Carcinoma	[Not Available]	2008	[Not Available]	-17996	Alive	TUMOR FREE	1363	#N/A	[Not Available]	#N/A	#N/A	#N/A	#N/A	[Not Available]	Negative	#N/A	0	1363	0	1363
TCGA-A8-A079-01A-21R-A00Z-07	0	0	0	0	0	2.033	0	0	0	0	0	0	1.0165	16.6031	0.6777	0	0	0.3388	1.3554	63.363	17.6197	TCGA-A8-A079	BRCA	69	FEMALE	[Not Available]	Stage IIIB	[Not Applicable]	Infiltrating Ductal Carcinoma	[Not Available]	2007	Post (prior bilateral ovariectomy OR >12 mo since LMP with no prior hysterectomy)	-25294	Alive	TUMOR FREE	274	#N/A	[Not Available]	#N/A	#N/A	#N/A	#N/A	[Not Available]	Negative	#N/A	0	274	0	274
TCGA-BH-A5IZ-01A-11R-A27Q-07	0	0	0	0	0	2.0192	0	0	5.4746	0	0.4163	0	0	0	0.4163	0	2.9142	0	1.249	286.012	9.1591	TCGA-BH-A5IZ	BRCA	51	FEMALE	BLACK OR AFRICAN AMERICAN	Stage IIB	[Not Applicable]	Infiltrating Ductal Carcinoma	[Not Available]	2012	Post (prior bilateral ovariectomy OR >12 mo since LMP with no prior hysterectomy)	-18927	Alive	TUMOR FREE	567	#N/A	[Not Available]	#N/A	#N/A	#N/A	#N/A	[Not Available]	Negative	#N/A	0	567	0	567
TCGA-E9-A22H-01A-11R-A157-07	0	0	0	0	0	2.0173	0	0	0	0	0	0.5043	37.0245	32.7807	1.0086	5.0432	0.7565	0.5043	55.9793	2.2694	9.3299	TCGA-E9-A22H	BRCA	42	FEMALE	WHITE	Stage IIB	[Not Applicable]	Infiltrating Ductal Carcinoma	[Not Available]	2011	Pre (<6 months since LMP AND no prior bilateral ovariectomy AND not on estrogen replacement)	-15504	Alive	TUMOR FREE	1232	#N/A	[Not Available]	#N/A	#N/A	#N/A	#N/A	[Not Available]	Negative	#N/A	0	1232	0	1232
TCGA-OL-A6VO-01A-12R-A33J-07	0	1.8838	0	0.9302	0	1.8872	0	0	0	0	0	0	0	0	0	0.3358	5.7085	0.3358	5.7085	414.708	57.0853	TCGA-OL-A6VO	BRCA	43	FEMALE	BLACK OR AFRICAN AMERICAN	Stage IA	[Not Applicable]	Infiltrating Ductal Carcinoma	[Not Available]	2012	[Unknown]	-15780	Alive	TUMOR FREE	858	#N/A	[Not Available]	#N/A	#N/A	#N/A	#N/A	[Not Available]	Negative	#N/A	0	858	0	858
TCGA-D8-A147-01A-11R-A115-07	0	0	0	0	0	1.8583	0	0	0.8252	0	0	0	0	0	0	4.696	14.4234	0	19.7902	526.957	13.4171	TCGA-D8-A147	BRCA	45	FEMALE	WHITE	[Not Available]	[Not Applicable]	Infiltrating Ductal Carcinoma	[Not Available]	2010	Indeterminate (neither Pre or Postmenopausal)	-16736	Alive	TUMOR FREE	584	#N/A	[Not Available]	#N/A	#N/A	#N/A	#N/A	[Not Available]	Negative	#N/A	0	584	0	584
TCGA-AC-A8OP-01A-11R-A36F-07	0	0	0	1.2786	0	1.8274	0	0	0	0	1.0353	0	0	11.3888	0.5177	1.0353	0	0	0.5177	6.212	31.5779	TCGA-AC-A8OP	BRCA	72	FEMALE	BLACK OR AFRICAN AMERICAN	Stage IA	[Not Applicable]	Infiltrating Ductal Carcinoma	[Not Available]	2011	Post (prior bilateral ovariectomy OR >12 mo since LMP with no prior hysterectomy)	-26550	Alive	TUMOR FREE	614	#N/A	[Not Available]	#N/A	#N/A	#N/A	#N/A	[Not Available]	Negative	#N/A	0	614	0	614
TCGA-A7-A6VV-01A-22R-A33J-07	0	0	0	0	0	1.8075	0	0	2.3004	0	2.9876	0	0	0	0	0	1.8672	0	0	58.2579	14.5645	TCGA-A7-A6VV	BRCA	51	FEMALE	BLACK OR AFRICAN AMERICAN	Stage IIA	[Not Applicable]	Infiltrating Ductal Carcinoma	[Not Available]	2013	Peri (6-12 months since last menstrual period)	-18695	Alive	TUMOR FREE	313	#N/A	[Not Available]	#N/A	#N/A	#N/A	#N/A	[Not Available]	Negative	#N/A	0	313	0	313
TCGA-BH-A1EY-01A-11R-A13Q-07	0	0	0	0	0	1.7846	0	0	4.5542	0	0.4876	1.4628	49.6378	286.709	4.876	3.9008	37.5453	0	0.4876	1.9504	5.3636	TCGA-BH-A1EY	BRCA	79	FEMALE	WHITE	Stage IIA	[Not Applicable]	Infiltrating Ductal Carcinoma	[Not Available]	2000	Post (prior bilateral ovariectomy OR >12 mo since LMP with no prior hysterectomy)	-28940	Dead	WITH TUMOR	#N/A	538	[Not Available]	Distant Metastasis	Lung	Liver	396	[Not Available]	[Not Available]	#N/A	1	538	1	538
TCGA-A8-A08B-01A-11R-A00Z-07	0	0	0	0	0	1.7668	0	0	0	0	0	0	4.417	0	0	7.0671	7.9505	0	0	3.5336	22.0848	TCGA-A8-A08B	BRCA	52	FEMALE	[Not Available]	Stage IIA	[Not Applicable]	Infiltrating Ductal Carcinoma	[Not Available]	2008	Pre (<6 months since LMP AND no prior bilateral ovariectomy AND not on estrogen replacement)	-19114	Alive	TUMOR FREE	1156	#N/A	[Not Available]	#N/A	#N/A	#N/A	#N/A	[Not Available]	Negative	#N/A	0	1156	0	1156
TCGA-A7-A4SE-01A-11R-A266-07	0	0	0	0	0	1.7597	0	0	0	0	0	0	0	1.1731	0	1.1731	0.5866	1.1731	14.6643	197.088	39.3002	TCGA-A7-A4SE	BRCA	54	FEMALE	BLACK OR AFRICAN AMERICAN	Stage IIA	[Not Applicable]	Infiltrating Ductal Carcinoma	[Not Available]	2011	Post (prior bilateral ovariectomy OR >12 mo since LMP with no prior hysterectomy)	-20080	Alive	TUMOR FREE	644	#N/A	[Not Available]	#N/A	#N/A	#N/A	#N/A	[Not Available]	Negative	#N/A	0	644	0	644
TCGA-BH-A0W5-01A-11R-A109-07	0	0	0	0	0	1.7357	0	0	0	0	0	0	0	10.4139	1.0414	0	0.6943	0	4.8598	32.9774	4.5127	TCGA-BH-A0W5	BRCA	77	FEMALE	WHITE	Stage IIA	[Not Applicable]	Infiltrating Ductal Carcinoma	[Not Available]	2008	[Not Available]	-28304	Alive	TUMOR FREE	1288	#N/A	[Not Available]	#N/A	#N/A	#N/A	#N/A	[Not Available]	Negative	#N/A	0	1288	0	1288
TCGA-AN-A0XT-01A-11R-A109-07	0	0	0	0	0	1.7256	0	0	0	0	0	0.4314	0	123.382	0	0	0.8628	0	2.157	0.8628	15.5306	TCGA-AN-A0XT	BRCA	54	FEMALE	WHITE	Stage IIIA	[Not Applicable]	Infiltrating Ductal Carcinoma	[Not Available]	2010	Post (prior bilateral ovariectomy OR >12 mo since LMP with no prior hysterectomy)	-19794	Alive	TUMOR FREE	10	#N/A	[Not Available]	#N/A	#N/A	#N/A	#N/A	[Not Available]	Negative	#N/A	0	10	0	10
TCGA-AR-A0U4-01A-11R-A109-07	0	0	0	0	0	1.7176	0	0	0	0	0	0	16.4892	0	0	0	53.9334	0	10.3057	260.735	10.9928	TCGA-AR-A0U4	BRCA	54	FEMALE	WHITE	Stage IIA	[Not Applicable]	Infiltrating Ductal Carcinoma	[Not Available]	2006	Pre (<6 months since LMP AND no prior bilateral ovariectomy AND not on estrogen replacement)	-19729	Alive	TUMOR FREE	3261	#N/A	[Not Available]	#N/A	#N/A	#N/A	#N/A	[Not Available]	Negative	#N/A	0	3261	0	3261
TCGA-A2-A1G6-01A-11R-A13Q-07	0	0	0	0	0	1.6678	0	0	0	0	1.0007	0	4.6531	191.794	0	7.3382	1.3342	0.3336	5.6704	77.0514	4.6698	TCGA-A2-A1G6	BRCA	50	FEMALE	WHITE	Stage IIIA	[Not Applicable]	Infiltrating Ductal Carcinoma	[Not Available]	2010	Pre (<6 months since LMP AND no prior bilateral ovariectomy AND not on estrogen replacement)	-18514	Alive	TUMOR FREE	501	#N/A	[Not Available]	#N/A	#N/A	#N/A	#N/A	[Not Available]	Negative	#N/A	0	501	0	501
TCGA-E2-A15O-01A-11R-A115-07	0	0	0	0	0	1.6483	0	0	0	0	0	0.8241	68.7504	1.2362	63.4594	0.8241	0	0.8241	892.14	4.9449	3.2966	TCGA-E2-A15O	BRCA	89	FEMALE	BLACK OR AFRICAN AMERICAN	Stage I	[Not Applicable]	Infiltrating Ductal Carcinoma	[Not Available]	2010	Post (prior bilateral ovariectomy OR >12 mo since LMP with no prior hysterectomy)	-32583	Alive	TUMOR FREE	1545	#N/A	[Not Available]	Locoregional Recurrence	#N/A	#N/A	1210	[Not Available]	Negative	#N/A	0	1545	0	1545
TCGA-B6-A0IO-01A-11R-A034-07	0	0	0	0	0	1.6449	0	0	0	0	0	0.329	6.5005	37.5031	1.6449	0	0.6579	0.329	23.0282	9.8692	28.2918	TCGA-B6-A0IO	BRCA	66	FEMALE	WHITE	Stage IIA	[Not Applicable]	Infiltrating Ductal Carcinoma	[Not Available]	2001	Indeterminate (neither Pre or Postmenopausal)	-24322	Alive	TUMOR FREE	5042	#N/A	[Not Available]	#N/A	#N/A	#N/A	#N/A	[Not Available]	Negative	#N/A	0	5042	0	5042
TCGA-BH-A0BD-01A-11R-A034-07	0	0	0	0	0	1.6351	0	0	0	0.327	0	0	0	4.5782	0.327	0	0.327	0.654	1.9621	22.2368	3.5971	TCGA-BH-A0BD	BRCA	47	FEMALE	WHITE	Stage IIA	[Not Applicable]	Infiltrating Ductal Carcinoma	[Not Available]	2009	Pre (<6 months since LMP AND no prior bilateral ovariectomy AND not on estrogen replacement)	-17275	Alive	TUMOR FREE	554	#N/A	[Not Available]	#N/A	#N/A	#N/A	#N/A	[Not Available]	Negative	#N/A	0	554	0	554
TCGA-A8-A082-01A-11R-A00Z-07	0	0	0	0	0	1.6	0	0	0	0	0	0	0	0	0	0.8	0	0	0	7.2	4	TCGA-A8-A082	BRCA	58	FEMALE	[Not Available]	Stage IIB	[Not Applicable]	Infiltrating Ductal Carcinoma	[Not Available]	2008	Post (prior bilateral ovariectomy OR >12 mo since LMP with no prior hysterectomy)	-21338	Alive	TUMOR FREE	549	#N/A	[Not Available]	#N/A	#N/A	#N/A	#N/A	[Not Available]	Negative	#N/A	0	549	0	549
TCGA-AR-A1AY-01A-21R-A12P-07	0	0.3858	0	0	0	1.5909	2.7997	0	0	0	0	0	13.2268	3.6741	0.3674	0	31.2299	0	0	529.071	6.6134	TCGA-AR-A1AY	BRCA	65	FEMALE	WHITE	Stage I	[Not Applicable]	Infiltrating Ductal Carcinoma	[Not Available]	2008	Post (prior bilateral ovariectomy OR >12 mo since LMP with no prior hysterectomy)	-23927	Alive	TUMOR FREE	1026	#N/A	[Not Available]	#N/A	#N/A	#N/A	#N/A	[Not Available]	Negative	#N/A	0	1026	0	1026
TCGA-AC-A8OQ-01A-11R-A41B-07	0	0.5292	0	0	0	1.5875	0	0	0	0	0	0	0	0.5292	0	0	23.8127	0	1.0583	286.811	29.6336	TCGA-AC-A8OQ	BRCA	72	FEMALE	BLACK OR AFRICAN AMERICAN	Stage IIB	[Not Applicable]	Infiltrating Ductal Carcinoma	[Not Available]	2011	Post (prior bilateral ovariectomy OR >12 mo since LMP with no prior hysterectomy)	-26535	Alive	TUMOR FREE	34	#N/A	[Not Available]	#N/A	#N/A	#N/A	#N/A	[Not Available]	Negative	#N/A	0	34	0	34
TCGA-AO-A03V-01A-11R-A115-07	0	0	0	0	0	1.5686	0	0	0	0	0	0.3922	28.6275	6.6667	0.7843	0	0.7843	1.5686	5.8824	5.098	69.4118	TCGA-AO-A03V	BRCA	41	FEMALE	WHITE	Stage I	[Not Applicable]	Infiltrating Ductal Carcinoma	[Not Available]	2008	Peri (6-12 months since last menstrual period)	-15284	Alive	TUMOR FREE	1351	#N/A	[Not Available]	#N/A	#N/A	#N/A	#N/A	[Not Available]	Negative	#N/A	0	1351	0	1351
TCGA-BH-A18H-01A-11R-A12D-07	0	0	0	0	0	1.5528	0	0	0	0	0	7.2464	1344.67	28.9855	13.4576	2.588	0	22.2567	1.5528	4.1408	10.352	TCGA-BH-A18H	BRCA	63	FEMALE	WHITE	Stage IA	[Not Applicable]	Infiltrating Ductal Carcinoma	[Not Available]	2010	Post (prior bilateral ovariectomy OR >12 mo since LMP with no prior hysterectomy)	-23065	Alive	TUMOR FREE	652	#N/A	[Not Available]	#N/A	#N/A	#N/A	#N/A	[Not Available]	Negative	#N/A	0	652	0	652
TCGA-A8-A084-01A-21R-A00Z-07	0	0	0	0	0	1.5469	0	0	0	0.3867	0	0	11.5363	0	5.0276	1.1602	0	0	9.2816	7.348	41.7674	TCGA-A8-A084	BRCA	81	FEMALE	[Not Available]	Stage IIB	[Not Applicable]	Infiltrating Ductal Carcinoma	[Not Available]	2007	Post (prior bilateral ovariectomy OR >12 mo since LMP with no prior hysterectomy)	-29858	Alive	WITH TUMOR	458	#N/A	[Not Available]	#N/A	#N/A	#N/A	#N/A	[Not Available]	Positive	#N/A	0	458	0	458
TCGA-E9-A1R0-01A-22R-A16F-07	0	0	0	0	0	1.5105	0.8359	0	0	0.2933	0	0	0.5866	16.1311	0	1.7598	1.1732	0	1.7598	13.7848	2.0531	TCGA-E9-A1R0	BRCA	58	FEMALE	WHITE	Stage IIA	[Not Applicable]	Infiltrating Ductal Carcinoma	[Not Available]	2011	Post (prior bilateral ovariectomy OR >12 mo since LMP with no prior hysterectomy)	-21394	Alive	TUMOR FREE	860	#N/A	[Not Available]	#N/A	#N/A	#N/A	#N/A	[Not Available]	[Not Available]	#N/A	0	860	0	860
TCGA-A8-A076-01A-21R-A00Z-07	0	0	0	0	0	1.4952	0	0	0	0	0	13.1579	34.375	191.388	0.5981	3.5885	8.3732	0	191.687	1.7943	2.6914	TCGA-A8-A076	BRCA	66	FEMALE	[Not Available]	Stage IIA	[Not Applicable]	Infiltrating Ductal Carcinoma	[Not Available]	2006	Post (prior bilateral ovariectomy OR >12 mo since LMP with no prior hysterectomy)	-24230	Alive	TUMOR FREE	1642	#N/A	[Not Available]	#N/A	#N/A	#N/A	#N/A	[Not Available]	Negative	#N/A	0	1642	0	1642
TCGA-AR-A256-01A-11R-A169-07	0	0	0	2.367	0	1.4794	0	0	0	0	0	0	0.2959	0.5918	0	0.2959	0.5918	0.2959	0	1158.96	3.2547	TCGA-AR-A256	BRCA	45	FEMALE	WHITE	Stage IIA	[Not Applicable]	Infiltrating Ductal Carcinoma	[Not Available]	2001	Pre (<6 months since LMP AND no prior bilateral ovariectomy AND not on estrogen replacement)	-16642	Dead	#N/A	#N/A	2854	[Not Available]	Locoregional Disease	#N/A	#N/A	1640	[Not Available]	Negative	#N/A	1	2854	#N/A	2854
TCGA-BH-A1EU-01A-11R-A137-07	0	0.2209	0	0	0	1.4308	0	0	0	0	0	0.4129	12.1379	33.8598	3.0969	32.621	1.0323	0.6194	0.6194	27.253	5.9874	TCGA-BH-A1EU	BRCA	83	FEMALE	WHITE	Stage I	[Not Applicable]	Infiltrating Ductal Carcinoma	[Not Available]	1999	Post (prior bilateral ovariectomy OR >12 mo since LMP with no prior hysterectomy)	-30339	Dead	TUMOR FREE	#N/A	1286	[Not Available]	#N/A	#N/A	#N/A	#N/A	[Not Available]	[Not Available]	#N/A	1	1286	0	1286
TCGA-BH-A18F-01A-11R-A12D-07	0	0	0	0	0	1.4202	7.603	0	0	0	0	0	9.4155	91.4084	0.3923	5.1	1.1769	0	5.8847	11.7693	0.7846	TCGA-BH-A18F	BRCA	50	FEMALE	WHITE	Stage IIA	[Not Applicable]	Infiltrating Ductal Carcinoma	[Not Available]	2010	Peri (6-12 months since last menstrual period)	-18594	Alive	TUMOR FREE	1001	#N/A	[Not Available]	#N/A	#N/A	#N/A	#N/A	[Not Available]	Negative	#N/A	0	1001	0	1001
TCGA-BH-A18U-01A-21R-A12D-07	0	0	0	0	0	1.407	0	0	0	0	0	0	0	0	0	0	0	0	0	1.7587	6.6831	TCGA-BH-A18U	BRCA	72	FEMALE	WHITE	Stage IIIA	[Not Applicable]	Infiltrating Ductal Carcinoma	[Not Available]	2003	Post (prior bilateral ovariectomy OR >12 mo since LMP with no prior hysterectomy)	-26426	Dead	TUMOR FREE	#N/A	1563	[Not Available]	#N/A	#N/A	#N/A	#N/A	[Not Available]	Negative	#N/A	1	1563	0	1563
TCGA-BH-A0E6-01A-11R-A034-07	0	0.4673	0	0	0	1.4019	0	0	0	0	0	0	0	1.4019	0	0.4673	6.0748	0	1.8692	300.467	48.5981	TCGA-BH-A0E6	BRCA	69	FEMALE	WHITE	Stage IA	[Not Applicable]	Infiltrating Ductal Carcinoma	[Not Available]	2009	Post (prior bilateral ovariectomy OR >12 mo since LMP with no prior hysterectomy)	-25408	Alive	TUMOR FREE	293	#N/A	[Not Available]	#N/A	#N/A	#N/A	#N/A	[Not Available]	Negative	#N/A	0	293	0	293
TCGA-AN-A0XV-01A-11R-A109-07	0	0	0	0	0	1.3947	0	0	0	0	0	0	0.6974	0.6974	0	0.3487	0	0.3487	4.8815	4.8815	6.6248	TCGA-AN-A0XV	BRCA	67	FEMALE	WHITE	Stage IIIA	[Not Applicable]	Infiltrating Ductal Carcinoma	[Not Available]	2010	Post (prior bilateral ovariectomy OR >12 mo since LMP with no prior hysterectomy)	-24779	Alive	TUMOR FREE	162	#N/A	[Not Available]	#N/A	#N/A	#N/A	#N/A	[Not Available]	Negative	#N/A	0	162	0	162
TCGA-E9-A1RF-01A-11R-A157-07	0	0.3413	0	0	0	1.3653	0	0	0	0	0	33.4496	2576.59	1661.56	12.2876	0.3413	0.6826	0	0.6826	2.7306	5.8025	TCGA-E9-A1RF	BRCA	68	FEMALE	WHITE	Stage IIIA	[Not Applicable]	Infiltrating Ductal Carcinoma	[Not Available]	2011	Post (prior bilateral ovariectomy OR >12 mo since LMP with no prior hysterectomy)	-25119	Alive	TUMOR FREE	200	#N/A	[Not Available]	#N/A	#N/A	#N/A	#N/A	[Not Available]	Negative	#N/A	0	200	0	200
TCGA-AO-A12F-01A-11R-A115-07	0	0	0	0	0	1.3611	0	0	0	0	0	0	0	1.3611	0	0	0	0	2.7222	374.989	50.7018	TCGA-AO-A12F	BRCA	36	FEMALE	WHITE	Stage IIA	[Not Applicable]	Infiltrating Ductal Carcinoma	[Not Available]	2006	Pre (<6 months since LMP AND no prior bilateral ovariectomy AND not on estrogen replacement)	-13409	Alive	TUMOR FREE	1842	#N/A	[Not Available]	#N/A	#N/A	#N/A	#N/A	[Not Available]	Negative	#N/A	0	1842	0	1842
TCGA-AR-A1AX-01A-11R-A12P-07	0	0	0	0	0	1.3384	0.5784	0	4.8885	0	0	0.3781	1.8904	10.2079	1.1342	0.3781	0.7561	0	6.0491	23.0624	12.4764	TCGA-AR-A1AX	BRCA	64	FEMALE	WHITE	Stage I	[Not Applicable]	Infiltrating Ductal Carcinoma	[Not Available]	2007	Post (prior bilateral ovariectomy OR >12 mo since LMP with no prior hysterectomy)	-23507	Alive	TUMOR FREE	2629	#N/A	[Not Available]	#N/A	#N/A	#N/A	#N/A	[Not Available]	Negative	#N/A	0	2629	0	2629
TCGA-AO-A03P-01A-11R-A00Z-07	0	0	0	0	0	1.3357	0	0	0	0	0	0.3339	2.0035	29.7187	0.3339	0.3339	0.3339	0	1.3357	6.0105	2.6713	TCGA-AO-A03P	BRCA	54	FEMALE	BLACK OR AFRICAN AMERICAN	Stage IIB	[Not Applicable]	Infiltrating Ductal Carcinoma	[Not Available]	2003	Post (prior bilateral ovariectomy OR >12 mo since LMP with no prior hysterectomy)	-19724	Dead	WITH TUMOR	#N/A	2911	[Not Available]	Distant Metastasis	Liver	#N/A	1922	[Not Available]	Close	#N/A	1	2911	1	2911
TCGA-B6-A0WT-01A-11R-A109-07	0	0	0	0	0	1.243	0	0	0	0	0	0	0	12.4301	0	1.243	0	6.215	2.486	17.4021	11.8086	TCGA-B6-A0WT	BRCA	61	FEMALE	WHITE	Stage IIB	[Not Applicable]	Infiltrating Ductal Carcinoma	[Not Available]	1995	Post (prior bilateral ovariectomy OR >12 mo since LMP with no prior hysterectomy)	-22362	Alive	TUMOR FREE	5739	#N/A	[Not Available]	New Primary Tumor	Other, specify	right breast cancer contralateral	3862	[Not Available]	Negative	#N/A	0	5739	0	5739
TCGA-AR-A0U2-01A-11R-A109-07	0	1.2404	0	0	0	1.2404	0	0	0	61.09	0	1.8606	47.1354	100.783	4.6515	76.5951	0.6202	4.6515	97.3719	352.586	1.8606	TCGA-AR-A0U2	BRCA	47	FEMALE	WHITE	Stage IIIA	[Not Applicable]	Infiltrating Ductal Carcinoma	[Not Available]	2004	Pre (<6 months since LMP AND no prior bilateral ovariectomy AND not on estrogen replacement)	-17390	Dead	WITH TUMOR	#N/A	2551	[Not Available]	Distant Metastasis	Bone	Liver	1609	[Not Available]	Negative	#N/A	1	2551	1	2551
TCGA-A2-A0D0-01A-11R-A00Z-07	0	0	0	0	0	1.2356	0	0	0	0	0	0.8237	0	0	0	0	9.4728	0.8237	38.3031	517.298	32.5371	TCGA-A2-A0D0	BRCA	60	FEMALE	BLACK OR AFRICAN AMERICAN	Stage IIA	[Not Applicable]	Infiltrating Ductal Carcinoma	[Not Available]	2008	Post (prior bilateral ovariectomy OR >12 mo since LMP with no prior hysterectomy)	-22115	Alive	TUMOR FREE	2048	#N/A	[Not Available]	#N/A	#N/A	#N/A	#N/A	[Not Available]	Negative	#N/A	0	2048	0	2048
TCGA-A2-A0YJ-01A-11R-A109-07	0	0.8706	0	0	0	1.2205	1.5704	0	0	0.4068	0	0	0	0	0	0	37.4288	0	0	1297.4	15.8666	TCGA-A2-A0YJ	BRCA	39	FEMALE	WHITE	Stage IIIA	[Not Applicable]	Infiltrating Ductal Carcinoma	[Not Available]	2010	Pre (<6 months since LMP AND no prior bilateral ovariectomy AND not on estrogen replacement)	-14448	Alive	WITH TUMOR	566	#N/A	[Not Available]	Distant Metastasis	Other, specify	Left Cervical Lymph Node	559	[Not Available]	Negative	#N/A	0	566	0	566
TCGA-E2-A1II-01A-11R-A144-07	0	0	0	0	0	1.194	0	0	2.9771	2.0855	0	0	0	0.5214	0	0	0	3.1283	2.0855	230.448	8.342	TCGA-E2-A1II	BRCA	51	FEMALE	WHITE	Stage I	[Not Applicable]	Infiltrating Ductal Carcinoma	[Not Available]	2008	Post (prior bilateral ovariectomy OR >12 mo since LMP with no prior hysterectomy)	-18788	Alive	TUMOR FREE	1025	#N/A	[Not Available]	#N/A	#N/A	#N/A	#N/A	[Not Available]	Negative	#N/A	0	1025	0	1025
TCGA-B6-A0X4-01A-11R-A109-07	0	0	0	0	0	1.1806	0	0	0	0	0	0	1.771	47.8158	0	0.5903	0	0	0	2.3613	16.5289	TCGA-B6-A0X4	BRCA	62	FEMALE	WHITE	Stage IIB	[Not Applicable]	Infiltrating Ductal Carcinoma	[Not Available]	1996	Post (prior bilateral ovariectomy OR >12 mo since LMP with no prior hysterectomy)	-22688	Dead	WITH TUMOR	#N/A	860	[Not Available]	Distant Metastasis	Bone	#N/A	716	[Not Available]	Negative	#N/A	1	860	1	860
TCGA-BH-A0DD-01A-31R-A12P-07	0	0.7003	0	0	0	1.166	3.0357	0	0	0	0	0	0	1.7507	0	0.3501	0	0	9.1036	315.476	8.4034	TCGA-BH-A0DD	BRCA	58	MALE	WHITE	Stage IIB	[Not Applicable]	Infiltrating Ductal Carcinoma	[Not Available]	2006	[Not Available]	-21386	Alive	TUMOR FREE	2486	#N/A	[Not Available]	#N/A	#N/A	#N/A	#N/A	[Not Available]	Negative	#N/A	0	2486	0	2486
TCGA-BH-A0BF-01A-21R-A12P-07	0	1.148	0	0	0	1.1634	0	0	0	0.3852	0	0	1.1557	1.541	0	0	0	0.3852	9.6311	16.9508	8.0901	TCGA-BH-A0BF	BRCA	56	FEMALE	WHITE	Stage IIB	[Not Applicable]	Infiltrating Ductal Carcinoma	[Not Available]	2009	Post (prior bilateral ovariectomy OR >12 mo since LMP with no prior hysterectomy)	-20691	Dead	TUMOR FREE	#N/A	1324	[Not Available]	#N/A	#N/A	#N/A	#N/A	[Not Available]	Negative	#N/A	1	1324	0	1324
TCGA-AR-A1AJ-01A-21R-A12P-07	0	0	0	0	0	1.1603	0	0	0	0	0.3868	0	0.3868	0.7735	0	0	40.2236	0	4.2544	30.9412	1.5471	TCGA-AR-A1AJ	BRCA	83	FEMALE	WHITE	Stage I	[Not Applicable]	Infiltrating Ductal Carcinoma	[Not Available]	2005	Post (prior bilateral ovariectomy OR >12 mo since LMP with no prior hysterectomy)	-30489	Alive	TUMOR FREE	3072	#N/A	[Not Available]	#N/A	#N/A	#N/A	#N/A	[Not Available]	Negative	#N/A	0	3072	0	3072
TCGA-C8-A1HN-01A-11R-A137-07	0	0	0	0	0	1.1477	0.963	0	0	0	0.5277	14.7748	12.9253	10.8172	0.2638	5.5405	3.166	0.2638	0	8.7065	6.332	TCGA-C8-A1HN	BRCA	56	FEMALE	ASIAN	Stage IIA	[Not Applicable]	Infiltrating Ductal Carcinoma	[Not Available]	2010	Post (prior bilateral ovariectomy OR >12 mo since LMP with no prior hysterectomy)	-20712	Alive	TUMOR FREE	394	#N/A	[Not Available]	#N/A	#N/A	#N/A	#N/A	[Not Available]	Negative	#N/A	0	394	0	394
TCGA-AR-A0U3-01A-11R-A109-07	0	0	0	0	0	1.1409	0	0	0	0	0	0	0	22.2476	0	6.8454	0	0	6.275	11.9795	1.7114	TCGA-AR-A0U3	BRCA	59	FEMALE	WHITE	Stage IIB	[Not Applicable]	Infiltrating Ductal Carcinoma	[Not Available]	2004	Post (prior bilateral ovariectomy OR >12 mo since LMP with no prior hysterectomy)	-21755	Alive	TUMOR FREE	4080	#N/A	[Not Available]	#N/A	#N/A	#N/A	#N/A	[Not Available]	Negative	#N/A	0	4080	0	4080
TCGA-E2-A154-01A-11R-A115-07	0	0	0	0	0	1.1282	0	0	3.8419	0	0	0	0	5.9642	0	0	0	1.4911	1.4911	4.9702	1.4911	TCGA-E2-A154	BRCA	68	FEMALE	WHITE	Stage I	[Not Applicable]	Infiltrating Ductal Carcinoma	[Not Available]	2009	Post (prior bilateral ovariectomy OR >12 mo since LMP with no prior hysterectomy)	-24999	Alive	TUMOR FREE	591	#N/A	[Not Available]	#N/A	#N/A	#N/A	#N/A	[Not Available]	Negative	#N/A	0	591	0	591
TCGA-A7-A4SF-01A-11R-A266-07	0	0	0	0	0	1.1151	0	0	0	1.1151	0	0.5575	3.3452	50.7357	0.5575	2.2301	0.5575	0	98.6838	52.4083	12.8233	TCGA-A7-A4SF	BRCA	54	FEMALE	BLACK OR AFRICAN AMERICAN	Stage IIA	[Not Applicable]	Infiltrating Ductal Carcinoma	[Not Available]	2012	Post (prior bilateral ovariectomy OR >12 mo since LMP with no prior hysterectomy)	-19985	Alive	TUMOR FREE	545	#N/A	[Not Available]	#N/A	#N/A	#N/A	#N/A	[Not Available]	Positive	#N/A	0	545	0	545
TCGA-AC-A2BK-01A-11R-A21T-07	0	0	0	0.8059	0	1.1129	0	0	0	0	0	0	0	0	0	0.3198	1.599	1.9188	14.071	447.714	12.472	TCGA-AC-A2BK	BRCA	78	FEMALE	BLACK OR AFRICAN AMERICAN	Stage IIIA	[Not Applicable]	Infiltrating Ductal Carcinoma	[Not Available]	2006	Post (prior bilateral ovariectomy OR >12 mo since LMP with no prior hysterectomy)	-28625	Alive	TUMOR FREE	2222	#N/A	[Not Available]	#N/A	#N/A	#N/A	#N/A	[Not Available]	Negative	#N/A	0	2222	0	2222
TCGA-B6-A0IJ-01A-11R-A034-07	0	0.3111	0	0	0	1.0903	0	0	0	0	0	0	0	1.1212	0	0	0	0.2803	1.4014	66.989	29.4303	TCGA-B6-A0IJ	BRCA	42	FEMALE	BLACK OR AFRICAN AMERICAN	Stage IIB	[Not Applicable]	Infiltrating Ductal Carcinoma	[Not Available]	1995	Indeterminate (neither Pre or Postmenopausal)	-15625	Alive	TUMOR FREE	7106	#N/A	[Not Available]	#N/A	#N/A	#N/A	#N/A	[Not Available]	Negative	#N/A	0	7106	0	7106
TCGA-GM-A2DA-01A-11R-A18M-07	0	0	0	0	0	1.0858	0	0	0	0	0	0	1.0858	72.747	2.1716	7.6004	1.0858	6.5147	7.6004	3.2573	27.1444	TCGA-GM-A2DA	BRCA	46	FEMALE	WHITE	Stage IIB	[Not Applicable]	Infiltrating Ductal Carcinoma	[Not Available]	1993	Post (prior bilateral ovariectomy OR >12 mo since LMP with no prior hysterectomy)	-16854	Dead	WITH TUMOR	#N/A	6593	[Not Available]	Distant Metastasis	Bone	#N/A	3014	[Not Available]	Negative	#N/A	1	6593	1	6593
TCGA-D8-A27F-01A-11R-A16F-07	0	0	0	0	0	1.083	0	0	0	0	0	0.2708	0	0	0	0	2.7075	0	2.7075	1227.05	32.2197	TCGA-D8-A27F	BRCA	40	FEMALE	WHITE	Stage IIA	[Not Applicable]	Infiltrating Ductal Carcinoma	[Not Available]	2010	Pre (<6 months since LMP AND no prior bilateral ovariectomy AND not on estrogen replacement)	-14731	Alive	TUMOR FREE	488	#N/A	[Not Available]	#N/A	#N/A	#N/A	#N/A	[Not Available]	Negative	#N/A	0	488	0	488
TCGA-BH-A0BJ-01A-11R-A056-07	0	0	0	0	0	1.0759	0	0	0	0	0	7.173	2308.72	15.4219	5.0211	1.7932	2.8692	0	0.7173	16.8565	0.3586	TCGA-BH-A0BJ	BRCA	41	FEMALE	WHITE	Stage IIB	[Not Applicable]	Infiltrating Ductal Carcinoma	[Not Available]	2008	Pre (<6 months since LMP AND no prior bilateral ovariectomy AND not on estrogen replacement)	-15027	Alive	TUMOR FREE	660	#N/A	[Not Available]	#N/A	#N/A	#N/A	#N/A	[Not Available]	Negative	#N/A	0	660	0	660
TCGA-A2-A0YF-01A-21R-A109-07	0	0	0	0	0	1.0627	0	0	0	1.594	0.797	1.594	112.03	105.207	7.4389	17.0032	0.2657	0.2657	1.0627	1.0627	1.3284	TCGA-A2-A0YF	BRCA	67	FEMALE	BLACK OR AFRICAN AMERICAN	Stage I	[Not Applicable]	Infiltrating Ductal Carcinoma	[Not Available]	2009	Post (prior bilateral ovariectomy OR >12 mo since LMP with no prior hysterectomy)	-24660	Alive	TUMOR FREE	1535	#N/A	[Not Available]	#N/A	#N/A	#N/A	#N/A	[Not Available]	Negative	#N/A	0	1535	0	1535
TCGA-E2-A15D-01A-11R-A115-07	0	0	0	0	0	1.0508	0	0	0	0	0.7005	0	0	1.7513	0	2.4518	0.7005	0.3503	0.3503	3.5026	4.2032	TCGA-E2-A15D	BRCA	47	FEMALE	WHITE	Stage IIA	[Not Applicable]	Infiltrating Ductal Carcinoma	[Not Available]	2009	Pre (<6 months since LMP AND no prior bilateral ovariectomy AND not on estrogen replacement)	-17224	Alive	TUMOR FREE	526	#N/A	[Not Available]	#N/A	#N/A	#N/A	#N/A	[Not Available]	Negative	#N/A	0	526	0	526
TCGA-E9-A1RB-01A-11R-A157-07	0	0	0	0	0	1.0406	0	0	0	0	0	0.2601	41.8574	17.6899	3.1217	3.1217	1.821	0.2601	6.7638	10.1457	2.8616	TCGA-E9-A1RB	BRCA	40	FEMALE	WHITE	Stage IIA	[Not Applicable]	Infiltrating Ductal Carcinoma	[Not Available]	2011	Pre (<6 months since LMP AND no prior bilateral ovariectomy AND not on estrogen replacement)	-14755	Dead	TUMOR FREE	#N/A	976	[Not Available]	#N/A	#N/A	#N/A	#N/A	[Not Available]	Negative	#N/A	1	976	0	976
TCGA-E2-A10A-01A-21R-A115-07	0	0	0	0	0	1.0377	0	0	2.1951	6.1424	0.3233	16.8109	3974.5	113.797	97.6325	8847.06	1.2931	0.3233	3.8794	3.8794	1.6164	TCGA-E2-A10A	BRCA	41	FEMALE	WHITE	Stage IIB	[Not Applicable]	Infiltrating Ductal Carcinoma	[Not Available]	2007	Pre (<6 months since LMP AND no prior bilateral ovariectomy AND not on estrogen replacement)	-15085	Alive	WITH TUMOR	1229	#N/A	[Not Available]	Distant Metastasis	Bone	#N/A	75	[Not Available]	Negative	#N/A	0	1229	0	1229
TCGA-B6-A0WV-01A-11R-A109-07	0	0	0	0	0	1.0346	0.7647	0	0	0	0	2.2492	11.2461	137.202	0	0	0	0	0.8997	4.9483	1.3495	TCGA-B6-A0WV	BRCA	67	FEMALE	WHITE	Stage IIB	[Not Applicable]	Infiltrating Ductal Carcinoma	[Not Available]	1995	Post (prior bilateral ovariectomy OR >12 mo since LMP with no prior hysterectomy)	-24803	Dead	TUMOR FREE	#N/A	2417	[Not Available]	#N/A	#N/A	#N/A	#N/A	[Not Available]	Negative	#N/A	1	2417	0	2417
TCGA-D8-A1JH-01A-11R-A13Q-07	0	0	0	0	0	1.0196	0	0	0	0	0	0	2.0391	123.367	0.2549	1.2745	0	0.7647	2.8038	19.3717	3.3136	TCGA-D8-A1JH	BRCA	56	FEMALE	WHITE	Stage IA	[Not Applicable]	Infiltrating Ductal Carcinoma	[Not Available]	2010	Post (prior bilateral ovariectomy OR >12 mo since LMP with no prior hysterectomy)	-20497	Alive	TUMOR FREE	426	#N/A	[Not Available]	#N/A	#N/A	#N/A	#N/A	[Not Available]	Negative	#N/A	0	426	0	426
TCGA-GM-A2DF-01A-11R-A180-07	0	0	0	0	0	1.004	0	0	0	0	0	0	0	0.502	0	0	22.0884	0	3.5141	348.394	27.1084	TCGA-GM-A2DF	BRCA	53	FEMALE	BLACK OR AFRICAN AMERICAN	Stage IIA	[Not Applicable]	Infiltrating Ductal Carcinoma	[Not Available]	2007	Post (prior bilateral ovariectomy OR >12 mo since LMP with no prior hysterectomy)	-19614	Alive	TUMOR FREE	2155	#N/A	[Not Available]	#N/A	#N/A	#N/A	#N/A	[Not Available]	Negative	#N/A	0	2155	0	2155
TCGA-GI-A2C8-01A-11R-A16F-07	0	0	0	0	0	1.004	0	0	0	0	0	0	0	105.422	0.3347	0.3347	0	0	1.6734	1.6734	6.0241	TCGA-GI-A2C8	BRCA	63	FEMALE	WHITE	Stage IIIB	[Not Applicable]	Infiltrating Ductal Carcinoma	[Not Available]	2004	[Not Available]	-23103	Alive	#N/A	225	#N/A	[Not Available]	#N/A	#N/A	#N/A	#N/A	[Not Available]	Negative	#N/A	0	225	0	225
TCGA-A8-A08T-01A-21R-A00Z-07	0	0	0	0	0	0.9983	0	0	0	0	0	0.9983	1.6639	802.33	0.6656	170.05	2.995	0	1.3311	7.6539	7.6539	TCGA-A8-A08T	BRCA	64	FEMALE	[Not Available]	Stage IV	[Not Applicable]	Infiltrating Ductal Carcinoma	[Not Available]	2002	Post (prior bilateral ovariectomy OR >12 mo since LMP with no prior hysterectomy)	-23560	Dead	WITH TUMOR	#N/A	3409	[Not Available]	#N/A	#N/A	#N/A	2557	[Not Available]	Positive	#N/A	1	3409	1	3409
TCGA-E2-A14V-01A-11R-A12D-07	0	0	0	0	0	0.9889	0	0	0	0	0	0	0	10.8776	0	0	1.3185	0	28.0181	10.8776	4.9444	TCGA-E2-A14V	BRCA	53	FEMALE	WHITE	Stage IIB	[Not Applicable]	Infiltrating Ductal Carcinoma	[Not Available]	2008	Post (prior bilateral ovariectomy OR >12 mo since LMP with no prior hysterectomy)	-19643	Alive	TUMOR FREE	1042	#N/A	[Not Available]	#N/A	#N/A	#N/A	#N/A	[Not Available]	Negative	#N/A	0	1042	0	1042
TCGA-A8-A07Z-01A-11R-A00Z-07	0	0	0	0	0	0.9826	0	0	0	0	7.861	0	1.9652	10.3175	0	0	25.5482	1.9652	6.8784	0.4913	0.9826	TCGA-A8-A07Z	BRCA	85	FEMALE	[Not Available]	Stage IIA	[Not Applicable]	Infiltrating Ductal Carcinoma	[Not Available]	2008	Post (prior bilateral ovariectomy OR >12 mo since LMP with no prior hysterectomy)	-31351	Alive	TUMOR FREE	1371	#N/A	[Not Available]	#N/A	#N/A	#N/A	#N/A	[Not Available]	Negative	#N/A	0	1371	0	1371
TCGA-A8-A08L-01A-11R-A00Z-07	0	0	0	0	0	0.9518	0	0	0	0	0	1.5863	0.9518	1.269	1.5863	0	0.9518	0	0.3173	7.9315	4.1244	TCGA-A8-A08L	BRCA	89	FEMALE	[Not Available]	Stage IIIA	[Not Applicable]	Infiltrating Ductal Carcinoma	[Not Available]	2008	Post (prior bilateral ovariectomy OR >12 mo since LMP with no prior hysterectomy)	-32842	Dead	TUMOR FREE	#N/A	304	[Not Available]	#N/A	#N/A	#N/A	#N/A	[Not Available]	Negative	#N/A	1	304	0	304
TCGA-E2-A108-01A-13R-A10J-07	0	0	0	0	0	0.917	0	1.2457	0	0	0	1.7301	18.1664	13.841	5.6229	0.8651	2.5952	0	5.6229	18.1664	11.6784	TCGA-E2-A108	BRCA	64	FEMALE	WHITE	Stage IIIA	[Not Applicable]	Infiltrating Ductal Carcinoma	[Not Available]	2009	Post (prior bilateral ovariectomy OR >12 mo since LMP with no prior hysterectomy)	-23530	Alive	WITH TUMOR	837	#N/A	[Not Available]	#N/A	#N/A	#N/A	#N/A	[Not Available]	Negative	#N/A	0	837	0	837
TCGA-D8-A1XW-01A-11R-A14M-07	0	0	0	0	0	0.9029	0	0	0	0	0	0	0.301	0	0	0	99.6163	0	0.301	415.018	6.922	TCGA-D8-A1XW	BRCA	53	FEMALE	WHITE	Stage IIA	[Not Applicable]	Infiltrating Ductal Carcinoma	[Not Available]	2011	Post (prior bilateral ovariectomy OR >12 mo since LMP with no prior hysterectomy)	-19478	Alive	TUMOR FREE	1309	#N/A	[Not Available]	#N/A	#N/A	#N/A	#N/A	[Not Available]	Negative	#N/A	0	1309	0	1309
TCGA-BH-A0DE-01A-11R-A115-07	0	0	0	0	0	0.8903	0	0	1.1059	0.7985	0	2.7947	17.1634	334.964	0	11.578	3.5932	0.3992	0.7985	15.5704	2.3954	TCGA-BH-A0DE	BRCA	62	FEMALE	WHITE	Stage IIA	[Not Applicable]	Infiltrating Ductal Carcinoma	[Not Available]	2007	Post (prior bilateral ovariectomy OR >12 mo since LMP with no prior hysterectomy)	-22656	Alive	TUMOR FREE	2372	#N/A	[Not Available]	#N/A	#N/A	#N/A	#N/A	[Not Available]	Negative	#N/A	0	2372	0	2372
TCGA-A8-A092-01A-11R-A00Z-07	0	0	0	0	0	0.8828	0	0	0	0	0	0.5885	34.3895	8.8276	0.5885	9.1219	0.2943	0	91.2187	16.4782	1.7655	TCGA-A8-A092	BRCA	48	FEMALE	[Not Available]	Stage IIIA	[Not Applicable]	Infiltrating Ductal Carcinoma	[Not Available]	2008	Pre (<6 months since LMP AND no prior bilateral ovariectomy AND not on estrogen replacement)	-17807	Alive	TUMOR FREE	942	#N/A	[Not Available]	#N/A	#N/A	#N/A	#N/A	[Not Available]	Negative	#N/A	0	942	0	942
TCGA-BH-A0AY-01A-21R-A00Z-07	0	0	0	0	0	0.8692	0	0	0	0	0	0	1.3038	0	0	0	0.8692	0	2.6076	2.6076	41.2864	TCGA-BH-A0AY	BRCA	62	FEMALE	WHITE	Stage IIA	[Not Applicable]	Infiltrating Ductal Carcinoma	[Not Available]	2008	Post (prior bilateral ovariectomy OR >12 mo since LMP with no prior hysterectomy)	-22703	Alive	TUMOR FREE	777	#N/A	[Not Available]	#N/A	#N/A	#N/A	#N/A	[Not Available]	Negative	#N/A	0	777	0	777
TCGA-EW-A1IZ-01A-11R-A13Q-07	0	0	0	0	0	0.8552	0	0	0	0	0	0.4276	0	13.2549	0	0	0	0.8552	0	8.124	18.3859	TCGA-EW-A1IZ	BRCA	53	FEMALE	WHITE	Stage IIIA	[Not Applicable]	Infiltrating Ductal Carcinoma	[Not Available]	2010	Post (prior bilateral ovariectomy OR >12 mo since LMP with no prior hysterectomy)	-19706	Alive	TUMOR FREE	554	#N/A	[Not Available]	#N/A	#N/A	#N/A	#N/A	[Not Available]	Negative	#N/A	0	554	0	554
TCGA-OL-A5RV-01A-12R-A28M-07	0	0	0	0	0	0.8344	0	0	0	0	0	30.0382	855.092	319.99	49.2293	16.2707	2.9204	0	1.2516	16.6879	15.8535	TCGA-OL-A5RV	BRCA	43	FEMALE	BLACK OR AFRICAN AMERICAN	Stage IIIC	[Not Applicable]	Infiltrating Ductal Carcinoma	[Not Available]	2011	Pre (<6 months since LMP AND no prior bilateral ovariectomy AND not on estrogen replacement)	-15820	Alive	TUMOR FREE	1062	#N/A	[Not Available]	#N/A	#N/A	#N/A	#N/A	[Not Available]	Negative	#N/A	0	1062	0	1062
TCGA-A8-A06Y-01A-21R-A00Z-07	0	0	0	0	0	0.8282	0	0	0	0	0	0	0	48.0381	0	0	0	0	4.1412	67.9159	2.4847	TCGA-A8-A06Y	BRCA	66	FEMALE	[Not Available]	Stage IIA	[Not Applicable]	Infiltrating Ductal Carcinoma	[Not Available]	2008	Post (prior bilateral ovariectomy OR >12 mo since LMP with no prior hysterectomy)	-24442	Alive	TUMOR FREE	791	#N/A	[Not Available]	#N/A	#N/A	#N/A	791	[Not Available]	Negative	#N/A	0	791	0	791
TCGA-EW-A1P7-01A-21R-A144-07	0	0	0	0	0	0.8278	0	0	0	0	0	0.4139	28.9445	6.2086	0.8278	0.4139	12.4172	0	4.553	228.477	6.6225	TCGA-EW-A1P7	BRCA	59	FEMALE	WHITE	Stage IIA	[Not Applicable]	Infiltrating Ductal Carcinoma	[Not Available]	2009	Post (prior bilateral ovariectomy OR >12 mo since LMP with no prior hysterectomy)	-21750	Alive	WITH TUMOR	915	#N/A	[Not Available]	Distant Metastasis	Other, specify	mediastinal lymph nodes	729	[Not Available]	Negative	#N/A	0	915	0	915
TCGA-E9-A229-01A-31R-A157-07	0	0	0	0	0	0.8246	0	0	0	0	0	0	57.9274	23.0896	0.5498	0	0.2749	1.0995	9.8955	26.663	5.4975	TCGA-E9-A229	BRCA	37	FEMALE	WHITE	Stage IA	[Not Applicable]	Infiltrating Ductal Carcinoma	[Not Available]	2011	Pre (<6 months since LMP AND no prior bilateral ovariectomy AND not on estrogen replacement)	-13817	Alive	TUMOR FREE	1148	#N/A	[Not Available]	#N/A	#N/A	#N/A	#N/A	[Not Available]	Negative	#N/A	0	1148	0	1148
TCGA-A8-A09R-01A-11R-A00Z-07	0	0.3339	0	0	0	0.8176	0	0	0	0	0	1.7272	3.7424	74.2713	0	0.2879	0	0	0.2879	53.8323	2.8787	TCGA-A8-A09R	BRCA	82	FEMALE	[Not Available]	Stage IIB	[Not Applicable]	Infiltrating Ductal Carcinoma	[Not Available]	2009	Post (prior bilateral ovariectomy OR >12 mo since LMP with no prior hysterectomy)	-30196	Alive	TUMOR FREE	273	#N/A	[Not Available]	#N/A	#N/A	#N/A	#N/A	[Not Available]	Negative	#N/A	0	273	0	273
TCGA-BH-A0DQ-01A-11R-A084-07	0	0	0	0	0	0.8173	0	0	0	0.8173	0	0	2.0433	11.8512	1.6347	0.8173	0.8173	0.8173	1.6347	8.5819	2.8606	TCGA-BH-A0DQ	BRCA	42	FEMALE	WHITE	Stage IIB	[Not Applicable]	Infiltrating Ductal Carcinoma	[Not Available]	2009	Pre (<6 months since LMP AND no prior bilateral ovariectomy AND not on estrogen replacement)	-15533	Alive	TUMOR FREE	98	#N/A	[Not Available]	#N/A	#N/A	#N/A	#N/A	[Not Available]	Negative	#N/A	0	98	0	98
TCGA-E2-A14T-01A-11R-A115-07	0	0	0	0	0	0.8165	0	0	0	0	0	0.5444	0	11.7039	0	0.5444	0	0.2722	1.0887	14.4257	3.8106	TCGA-E2-A14T	BRCA	52	FEMALE	WHITE	Stage IIA	[Not Applicable]	Infiltrating Ductal Carcinoma	[Not Available]	2008	Post (prior bilateral ovariectomy OR >12 mo since LMP with no prior hysterectomy)	-19237	Alive	TUMOR FREE	2311	#N/A	[Not Available]	#N/A	#N/A	#N/A	#N/A	[Not Available]	Negative	#N/A	0	2311	0	2311
TCGA-WT-AB41-01A-11R-A41B-07	0	0	0	0	0	0.7886	0	0	0	0	0	0	0	4.7319	0	0	0	0	0.7886	2.3659	37.8549	TCGA-WT-AB41	BRCA	55	FEMALE	BLACK OR AFRICAN AMERICAN	Stage IIB	[Not Applicable]	Infiltrating Ductal Carcinoma	[Not Available]	2010	Post (prior bilateral ovariectomy OR >12 mo since LMP with no prior hysterectomy)	#N/A	Alive	TUMOR FREE	1611	#N/A	[Not Available]	#N/A	#N/A	#N/A	#N/A	[Not Available]	Negative	#N/A	0	1611	0	1611
TCGA-AR-A0U0-01A-11R-A109-07	0	0	0	0	0	0.7828	0	0	0	0	0	0	0	0	0	0	0.3914	0	3.5225	0.7828	12.9159	TCGA-AR-A0U0	BRCA	73	FEMALE	WHITE	Stage IIB	[Not Applicable]	Infiltrating Ductal Carcinoma	[Not Available]	2004	Post (prior bilateral ovariectomy OR >12 mo since LMP with no prior hysterectomy)	-26993	Alive	TUMOR FREE	1988	#N/A	[Not Available]	#N/A	#N/A	#N/A	#N/A	[Not Available]	Negative	#N/A	0	1988	0	1988
TCGA-A2-A04Q-01A-21R-A034-07	0	0	0	1.5426	0.3857	0.7713	0.3857	0	0	0	0	0	0.3857	55.5341	0	0	65.9468	0.3857	1.5426	10.7983	12.7266	TCGA-A2-A04Q	BRCA	48	FEMALE	WHITE	Stage IA	[Not Applicable]	Infiltrating Ductal Carcinoma	[Not Available]	2004	Post (prior bilateral ovariectomy OR >12 mo since LMP with no prior hysterectomy)	-17660	Alive	TUMOR FREE	2385	#N/A	[Not Available]	#N/A	#N/A	#N/A	#N/A	[Not Available]	Negative	#N/A	0	2385	0	2385
TCGA-AR-A1AW-01A-21R-A12P-07	0	0	0	0	0	0.7567	0	0	0	0.3784	0	0.7567	18.1612	35.944	0.7567	0	0.3784	0.7567	9.4589	24.9716	11.7291	TCGA-AR-A1AW	BRCA	65	FEMALE	WHITE	Stage IIA	[Not Applicable]	Infiltrating Ductal Carcinoma	[Not Available]	2007	Post (prior bilateral ovariectomy OR >12 mo since LMP with no prior hysterectomy)	-23855	Alive	TUMOR FREE	2632	#N/A	[Not Available]	#N/A	#N/A	#N/A	#N/A	[Not Available]	Negative	#N/A	0	2632	0	2632
TCGA-AN-A0XL-01A-11R-A10J-07	0	0	0	0	0	0.7485	0	0	0	0	0	0	4.8393	56.8886	0	5.2397	0.7485	0	0	8.2339	12.7251	TCGA-AN-A0XL	BRCA	61	FEMALE	WHITE	Stage IIA	[Not Applicable]	Infiltrating Ductal Carcinoma	[Not Available]	2010	Post (prior bilateral ovariectomy OR >12 mo since LMP with no prior hysterectomy)	-22341	Alive	TUMOR FREE	163	#N/A	[Not Available]	#N/A	#N/A	#N/A	#N/A	[Not Available]	Negative	#N/A	0	163	0	163
TCGA-AN-A0FK-01A-11R-A034-07	0	0	0	0	0	0.7444	0	0	0	0	0	0	0	1.861	0	0	0	0	0.3722	2.9776	0.7444	TCGA-AN-A0FK	BRCA	88	FEMALE	WHITE	Stage IIIB	[Not Applicable]	Infiltrating Ductal Carcinoma	[Not Available]	2010	Post (prior bilateral ovariectomy OR >12 mo since LMP with no prior hysterectomy)	-32462	Alive	TUMOR FREE	213	#N/A	[Not Available]	#N/A	#N/A	#N/A	#N/A	[Not Available]	Negative	#N/A	0	213	0	213
TCGA-AN-A0FF-01A-11R-A034-07	0	0	0	0	0	0.7362	0	0	0	0	0	0	10.6745	3.3128	0	0.3681	0	0.7362	15.8277	3.6809	2.5766	TCGA-AN-A0FF	BRCA	32	FEMALE	WHITE	Stage IA	[Not Applicable]	Infiltrating Ductal Carcinoma	[Not Available]	2010	Pre (<6 months since LMP AND no prior bilateral ovariectomy AND not on estrogen replacement)	-11929	Alive	TUMOR FREE	172	#N/A	[Not Available]	#N/A	#N/A	#N/A	#N/A	[Not Available]	Negative	#N/A	0	172	0	172
TCGA-C8-A1HG-01A-11R-A137-07	0	0	0	0	0	0.7331	0	0	0	0	0	0	6.5982	4.3988	0	0.7331	0	0	3.6657	0	5.132	TCGA-C8-A1HG	BRCA	50	FEMALE	ASIAN	Stage IIA	[Not Applicable]	Infiltrating Ductal Carcinoma	[Not Available]	2010	Pre (<6 months since LMP AND no prior bilateral ovariectomy AND not on estrogen replacement)	#N/A	Alive	TUMOR FREE	345	#N/A	[Not Available]	#N/A	#N/A	#N/A	#N/A	[Not Available]	Negative	#N/A	0	345	0	345
TCGA-BH-A1FM-01A-11R-A13Q-07	0	0	0	0	0	0.725	0	0	0	0.3625	0.3625	0.725	1.0874	0.725	0	1.0874	0.3625	0	26.0988	132.669	0.3625	TCGA-BH-A1FM	BRCA	44	FEMALE	WHITE	Stage IIIA	[Not Applicable]	Infiltrating Ductal Carcinoma	[Not Available]	1998	[Not Available]	-16289	Dead	#N/A	#N/A	1388	[Not Available]	#N/A	#N/A	#N/A	#N/A	[Not Available]	[Not Available]	#N/A	1	1388	#N/A	1388
TCGA-E2-A156-01A-11R-A12D-07	0	0	0	0	0	0.7179	0	0	0	0	0	0.7179	54.5298	104.81	2.1536	2.1536	0	0	0	0.7179	0.7179	TCGA-E2-A156	BRCA	61	FEMALE	WHITE	Stage I	[Not Applicable]	Infiltrating Ductal Carcinoma	[Not Available]	2009	Post (prior bilateral ovariectomy OR >12 mo since LMP with no prior hysterectomy)	-22422	Alive	TUMOR FREE	726	#N/A	[Not Available]	#N/A	#N/A	#N/A	#N/A	[Not Available]	Negative	#N/A	0	726	0	726
TCGA-BH-A18K-01A-11R-A12D-07	0	0	0	0	0	0.7083	0	0	0	0	1.0624	23.019	5583.47	113.325	25.8521	219.92	1.4166	15.228	1.4166	5.3121	7.0828	TCGA-BH-A18K	BRCA	46	FEMALE	WHITE	Stage I	[Not Applicable]	Infiltrating Ductal Carcinoma	[Not Available]	1999	[Not Available]	-16824	Dead	WITH TUMOR	#N/A	2763	[Not Available]	#N/A	#N/A	#N/A	#N/A	[Not Available]	Negative	#N/A	1	2763	1	2763
TCGA-A2-A0EV-01A-11R-A034-07	0	0	0	0	0	0.7018	0	0	0	0	0	0	4.5614	3.5088	1.0526	1.0526	0	0	0.3509	13.6842	6.3158	TCGA-A2-A0EV	BRCA	80	FEMALE	WHITE	Stage IA	[Not Applicable]	Infiltrating Ductal Carcinoma	[Not Available]	2008	Post (prior bilateral ovariectomy OR >12 mo since LMP with no prior hysterectomy)	-29285	Alive	TUMOR FREE	968	#N/A	[Not Available]	#N/A	#N/A	#N/A	#N/A	[Not Available]	Negative	#N/A	0	968	0	968
TCGA-AR-A24Z-01A-11R-A169-07	0	0	0	0	0	0.6867	0	0	0	0.2289	0	0	12.6954	2.518	6.4095	13.5058	0.9156	0	1.8313	0.6867	4.5782	TCGA-AR-A24Z	BRCA	57	FEMALE	WHITE	Stage IIA	[Not Applicable]	Infiltrating Ductal Carcinoma	[Not Available]	2006	Post (prior bilateral ovariectomy OR >12 mo since LMP with no prior hysterectomy)	-20900	Alive	TUMOR FREE	3001	#N/A	[Not Available]	#N/A	#N/A	#N/A	#N/A	[Not Available]	Negative	#N/A	0	3001	0	3001
TCGA-C8-A138-01A-11R-A115-07	0	1.541	0	0	0	0.6832	0	1.3715	0	22.0881	2.5684	0	0	1.541	0	3.5957	3.0821	0.5137	31.3343	6.1641	22.6018	TCGA-C8-A138	BRCA	54	FEMALE	ASIAN	Stage IIIA	[Not Applicable]	Infiltrating Ductal Carcinoma	[Not Available]	2010	Post (prior bilateral ovariectomy OR >12 mo since LMP with no prior hysterectomy)	-20053	Alive	TUMOR FREE	380	#N/A	[Not Available]	#N/A	#N/A	#N/A	#N/A	[Not Available]	Negative	#N/A	0	380	0	380
TCGA-A8-A06O-01A-11R-A00Z-07	0	0	0	0	0	0.6799	0	0	0	0	0	1.0198	0.6799	5.7789	0.3399	4.4191	0	0.3399	0	21.4158	4.0792	TCGA-A8-A06O	BRCA	60	FEMALE	[Not Available]	Stage I	[Not Applicable]	Infiltrating Ductal Carcinoma	[Not Available]	2009	Post (prior bilateral ovariectomy OR >12 mo since LMP with no prior hysterectomy)	-22157	Alive	TUMOR FREE	396	#N/A	[Not Available]	#N/A	#N/A	#N/A	#N/A	[Not Available]	Negative	#N/A	0	396	0	396
TCGA-E2-A9RU-01A-11R-A41B-07	0	0	0	0	0	0.674	0	0	0	0	0	0.674	25.6108	5.3917	5.3917	0	0.674	0	2.0219	0	18.8711	TCGA-E2-A9RU	BRCA	90	FEMALE	BLACK OR AFRICAN AMERICAN	Stage IIIC	[Not Applicable]	Infiltrating Ductal Carcinoma	[Not Available]	2013	Post (prior bilateral ovariectomy OR >12 mo since LMP with no prior hysterectomy)	-32873	Alive	TUMOR FREE	538	#N/A	[Not Available]	#N/A	#N/A	#N/A	#N/A	[Not Available]	Negative	#N/A	0	538	0	538
TCGA-A7-A0CE-01A-11R-A00Z-07	0	0	0	0	0	0.6679	2.2002	0	0.8611	0	0	0	0	17.6286	0.339	0.339	1.6951	0	4.0681	2157.13	3.7291	TCGA-A7-A0CE	BRCA	57	FEMALE	WHITE	Stage IIA	[Not Applicable]	Infiltrating Ductal Carcinoma	[Not Available]	2009	Indeterminate (neither Pre or Postmenopausal)	-20863	Alive	TUMOR FREE	1074	#N/A	[Not Available]	#N/A	#N/A	#N/A	#N/A	[Not Available]	Negative	#N/A	0	1074	0	1074
TCGA-BH-A18V-01A-11R-A12D-07	0	0	0	0	0	0.6629	0	0	0	0	0	0	0	0	0.3314	0	10.2743	0	1.9886	384.125	69.9312	TCGA-BH-A18V	BRCA	48	FEMALE	WHITE	Stage IIB	[Not Applicable]	Infiltrating Ductal Carcinoma	[Not Available]	2001	[Not Available]	-17682	Dead	#N/A	#N/A	1556	[Not Available]	#N/A	#N/A	#N/A	#N/A	[Not Available]	Negative	#N/A	1	1556	#N/A	1556
TCGA-D8-A27N-01A-11R-A16F-07	0	0	0	0	0	0.6621	0	0	0	0	0	0	4.6247	25.4904	0.6621	1.6552	0.331	0	2.3173	2.9794	10.9244	TCGA-D8-A27N	BRCA	36	FEMALE	WHITE	Stage IIIA	[Not Applicable]	Infiltrating Ductal Carcinoma	[Not Available]	2011	Pre (<6 months since LMP AND no prior bilateral ovariectomy AND not on estrogen replacement)	-13243	Alive	TUMOR FREE	519	#N/A	[Not Available]	#N/A	#N/A	#N/A	#N/A	[Not Available]	Negative	#N/A	0	519	0	519
TCGA-BH-A0EB-01A-11R-A034-07	0	0	0	0	0	0.6585	0	0	0	0	0.3293	2.3049	666.194	5.5976	5.5976	0.9878	1.9756	0	25.0247	6.9147	1.3171	TCGA-BH-A0EB	BRCA	69	FEMALE	WHITE	Stage IA	[Not Applicable]	Infiltrating Ductal Carcinoma	[Not Available]	2008	Post (prior bilateral ovariectomy OR >12 mo since LMP with no prior hysterectomy)	-25259	Alive	TUMOR FREE	745	#N/A	[Not Available]	#N/A	#N/A	#N/A	#N/A	[Not Available]	Negative	#N/A	0	745	0	745
TCGA-E9-A244-01A-11R-A169-07	0	0	0	0	0	0.6534	0	0	0	0	0	0	1.6335	0	0.9801	0	1.3068	0	3.2669	948.056	6.2071	TCGA-E9-A244	BRCA	54	FEMALE	WHITE	Stage IIA	[Not Applicable]	Infiltrating Ductal Carcinoma	[Not Available]	2011	Post (prior bilateral ovariectomy OR >12 mo since LMP with no prior hysterectomy)	-19778	Alive	TUMOR FREE	21	#N/A	[Not Available]	#N/A	#N/A	#N/A	#N/A	[Not Available]	Negative	#N/A	0	21	0	21
TCGA-A8-A08Z-01A-21R-A00Z-07	0	0.3264	0	0	0	0.6527	0	0	0	0	0	0	1.6319	3.5901	0	0	0	0	0.3264	2.2846	4.2428	TCGA-A8-A08Z	BRCA	76	FEMALE	[Not Available]	[Discrepancy]	[Not Applicable]	Infiltrating Ductal Carcinoma	[Not Available]	2004	Post (prior bilateral ovariectomy OR >12 mo since LMP with no prior hysterectomy)	-28003	Alive	TUMOR FREE	1217	#N/A	[Not Available]	#N/A	#N/A	#N/A	#N/A	[Not Available]	Negative	#N/A	0	1217	0	1217
TCGA-A8-A07W-01A-11R-A00Z-07	0	0	0	0	0	0.6356	0	0	0	0.3178	0.3178	6.6736	679.012	21.9274	2.5423	8.8981	0.3178	0	0	1.2712	0.9534	TCGA-A8-A07W	BRCA	76	FEMALE	[Not Available]	Stage IV	[Not Applicable]	Infiltrating Ductal Carcinoma	[Not Available]	2009	Post (prior bilateral ovariectomy OR >12 mo since LMP with no prior hysterectomy)	-27942	Alive	WITH TUMOR	304	#N/A	[Not Available]	#N/A	#N/A	#N/A	#N/A	[Not Available]	Positive	#N/A	0	304	0	304
TCGA-D8-A1Y3-01A-11R-A157-07	0	0	0	0	0	0.6312	0	0	0	0	0	1.2623	0	4.7337	0	6.9428	189.349	4.1026	3.4714	0	0.3156	TCGA-D8-A1Y3	BRCA	61	FEMALE	WHITE	Stage IIIA	[Not Applicable]	Infiltrating Ductal Carcinoma	[Not Available]	2011	Post (prior bilateral ovariectomy OR >12 mo since LMP with no prior hysterectomy)	-22317	Alive	TUMOR FREE	430	#N/A	[Not Available]	#N/A	#N/A	#N/A	#N/A	[Not Available]	Negative	#N/A	0	430	0	430
TCGA-A8-A086-01A-11R-A00Z-07	0	0	0	0	0	0.625	0	0	0	0	0	0	0	8.7507	0	2.5002	0.9376	10.6258	21.8767	8.4382	2.8127	TCGA-A8-A086	BRCA	59	FEMALE	[Not Available]	Stage IIA	[Not Applicable]	Infiltrating Ductal Carcinoma	[Not Available]	2009	Post (prior bilateral ovariectomy OR >12 mo since LMP with no prior hysterectomy)	-21731	Alive	TUMOR FREE	396	#N/A	[Not Available]	#N/A	#N/A	#N/A	#N/A	[Not Available]	Negative	#N/A	0	396	0	396
TCGA-C8-A27A-01A-11R-A169-07	0	0	0	0	0	0.6159	0	0	2.1836	0.2545	0	0.2545	0	0.509	0	0.2545	0	0.509	31.0492	187.313	4.581	TCGA-C8-A27A	BRCA	48	FEMALE	ASIAN	Stage IIB	[Not Applicable]	Infiltrating Ductal Carcinoma	[Not Available]	2010	Peri (6-12 months since last menstrual period)	-17779	Alive	TUMOR FREE	747	#N/A	[Not Available]	#N/A	#N/A	#N/A	#N/A	[Not Available]	Negative	#N/A	0	747	0	747
TCGA-S3-AA15-01A-11R-A41B-07	0	0	0	0	0	0.6075	0	0	0	0	0	0	0	12.1507	0.6075	1.8226	15.7959	0	22.4787	214.459	20.0486	TCGA-S3-AA15	BRCA	51	FEMALE	BLACK OR AFRICAN AMERICAN	Stage IIB	[Not Applicable]	Infiltrating Ductal Carcinoma	[Not Available]	2013	Post (prior bilateral ovariectomy OR >12 mo since LMP with no prior hysterectomy)	-18659	Alive	TUMOR FREE	525	#N/A	[Not Available]	#N/A	#N/A	#N/A	#N/A	[Not Available]	Negative	#N/A	0	525	0	525
TCGA-B6-A0RO-01A-22R-A084-07	0	0	0	0	0	0.5981	0	0	0	0.5981	0	3.8879	657.968	2.3925	137.869	21.2336	4.486	0.2991	54.1308	6.5794	0.8972	TCGA-B6-A0RO	BRCA	71	FEMALE	WHITE	Stage IIIB	[Not Applicable]	Infiltrating Ductal Carcinoma	[Not Available]	1993	Post (prior bilateral ovariectomy OR >12 mo since LMP with no prior hysterectomy)	-26269	Alive	TUMOR FREE	4929	#N/A	[Not Available]	#N/A	#N/A	#N/A	#N/A	[Not Available]	Negative	#N/A	0	4929	0	4929
TCGA-AR-A24Q-01A-12R-A169-07	0	0	0	0	0	0.5822	0	0	0	0	0	0	1.4556	1.4556	0	0.5822	0.5822	0	2.329	593.886	6.4047	TCGA-AR-A24Q	BRCA	49	FEMALE	WHITE	Stage IIB	[Not Applicable]	Infiltrating Ductal Carcinoma	[Not Available]	2006	Post (prior bilateral ovariectomy OR >12 mo since LMP with no prior hysterectomy)	-18084	Alive	TUMOR FREE	3172	#N/A	[Not Available]	#N/A	#N/A	#N/A	#N/A	[Not Available]	Negative	#N/A	0	3172	0	3172
TCGA-BH-A1FD-01A-11R-A13Q-07	0	0	0	0	0	0.58	0	0	0	0	0.58	0	3.1903	7.8306	0	0.8701	0	0	0.8701	0.29	1.4501	TCGA-BH-A1FD	BRCA	68	FEMALE	WHITE	Stage I	[Not Applicable]	Infiltrating Ductal Carcinoma	[Not Available]	1998	Post (prior bilateral ovariectomy OR >12 mo since LMP with no prior hysterectomy)	-24940	Dead	WITH TUMOR	#N/A	1009	[Not Available]	#N/A	#N/A	#N/A	#N/A	[Not Available]	[Not Available]	#N/A	1	1009	1	1009
TCGA-BH-A18L-01A-32R-A12D-07	0	0	0	0	0	0.578	0	0	0	0	0	0	0	0	0	0	0	0	3.7572	169.075	2.6012	TCGA-BH-A18L	BRCA	50	FEMALE	WHITE	Stage IIIA	[Not Applicable]	Infiltrating Ductal Carcinoma	[Not Available]	2003	[Not Available]	-18519	Dead	#N/A	#N/A	811	[Not Available]	#N/A	#N/A	#N/A	#N/A	[Not Available]	Negative	#N/A	1	811	#N/A	811
TCGA-A2-A0CV-01A-31R-A115-07	0	0	0	0	0	0.5731	0	0	0	0	0.2865	0	13.1745	48.7097	1.1461	0.2865	0.5731	0	4.0114	19.1973	2.5787	TCGA-A2-A0CV	BRCA	41	FEMALE	ASIAN	Stage IIB	[Not Applicable]	Infiltrating Ductal Carcinoma	[Not Available]	2005	Post (prior bilateral ovariectomy OR >12 mo since LMP with no prior hysterectomy)	-15289	Alive	TUMOR FREE	3011	#N/A	[Not Available]	#N/A	#N/A	#N/A	#N/A	[Not Available]	Negative	#N/A	0	3011	0	3011
TCGA-AQ-A1H3-01A-31R-A13Q-07	0	0	0	0	0	0.5609	0	0	0	0	0	0.5609	8.9545	10.0959	1.9631	1.6827	0.2804	0	0.5609	79.6456	11.7786	TCGA-AQ-A1H3	BRCA	49	FEMALE	WHITE	Stage IIIC	[Not Applicable]	Infiltrating Ductal Carcinoma	[Not Available]	2010	Pre (<6 months since LMP AND no prior bilateral ovariectomy AND not on estrogen replacement)	-18177	Alive	TUMOR FREE	989	#N/A	[Not Available]	#N/A	#N/A	#N/A	#N/A	[Not Available]	Negative	#N/A	0	989	0	989
TCGA-AR-A1AU-01A-11R-A12P-07	0	0	0	0.5684	0	0.5609	0	0	0	0	0	0	0	27.1031	0	2.2586	0.7529	0.7529	0.7529	17.6923	6.0229	TCGA-AR-A1AU	BRCA	39	FEMALE	WHITE	Stage IIIA	[Not Applicable]	Infiltrating Ductal Carcinoma	[Not Available]	2007	Pre (<6 months since LMP AND no prior bilateral ovariectomy AND not on estrogen replacement)	-14564	Alive	TUMOR FREE	2868	#N/A	[Not Available]	#N/A	#N/A	#N/A	#N/A	[Not Available]	Negative	#N/A	0	2868	0	2868
TCGA-E2-A153-01A-12R-A12D-07	0	0	0	0	0	0.5562	0	0	0	0	0	0	0	0	0.5562	0	0	0	1.1123	8.3426	0	TCGA-E2-A153	BRCA	51	FEMALE	WHITE	Stage IIB	[Not Applicable]	Infiltrating Ductal Carcinoma	[Not Available]	2009	Pre (<6 months since LMP AND no prior bilateral ovariectomy AND not on estrogen replacement)	-18875	Alive	TUMOR FREE	707	#N/A	[Not Available]	#N/A	#N/A	#N/A	#N/A	[Not Available]	Negative	#N/A	0	707	0	707
TCGA-E2-A1IK-01A-11R-A144-07	0	1.1111	0	0	0	0.5556	0	0	0	0	0	0	6.6667	47.2222	0	1.1111	0.5556	0	0.5556	8.8889	0.5556	TCGA-E2-A1IK	BRCA	71	FEMALE	WHITE	Stage IIA	[Not Applicable]	Infiltrating Ductal Carcinoma	[Not Available]	2009	Post (prior bilateral ovariectomy OR >12 mo since LMP with no prior hysterectomy)	-26052	Alive	TUMOR FREE	1800	#N/A	[Not Available]	#N/A	#N/A	#N/A	#N/A	[Not Available]	Negative	#N/A	0	1800	0	1800
TCGA-C8-A274-01A-11R-A16F-07	0	0	0	0	0	0.5532	0	0	0	0	0.2766	1.1063	13.456	5.8083	1.6595	0	1.6595	0.2766	4.9786	10.5103	25.7226	TCGA-C8-A274	BRCA	63	FEMALE	ASIAN	Stage IIA	[Not Applicable]	Infiltrating Ductal Carcinoma	[Not Available]	2010	Post (prior bilateral ovariectomy OR >12 mo since LMP with no prior hysterectomy)	-23337	Alive	TUMOR FREE	508	#N/A	[Not Available]	#N/A	#N/A	#N/A	#N/A	[Not Available]	Negative	#N/A	0	508	0	508
TCGA-E2-A572-01A-13R-A31O-07	0	0	0	0	0	0.5398	0	0	1.4595	2.9989	0	0	28.9741	31.4882	2.9989	2.4991	0	0.4998	0.9996	0	5.9978	TCGA-E2-A572	BRCA	72	FEMALE	BLACK OR AFRICAN AMERICAN	Stage IIIA	[Not Applicable]	Infiltrating Ductal Carcinoma	[Not Available]	2011	Post (prior bilateral ovariectomy OR >12 mo since LMP with no prior hysterectomy)	-26399	Alive	TUMOR FREE	1208	#N/A	[Not Available]	#N/A	#N/A	#N/A	#N/A	[Not Available]	Negative	#N/A	0	1208	0	1208
TCGA-E2-A570-01A-11R-A29R-07	0	0	0	0	0	0.535	0	0	0	0	0	0	9.0958	3.7453	0	0.535	0	0	3.2103	6.9556	28.3574	TCGA-E2-A570	BRCA	47	FEMALE	BLACK OR AFRICAN AMERICAN	Stage IB	[Not Applicable]	Infiltrating Ductal Carcinoma	[Not Available]	2011	Pre (<6 months since LMP AND no prior bilateral ovariectomy AND not on estrogen replacement)	-17456	Alive	TUMOR FREE	931	#N/A	[Not Available]	#N/A	#N/A	#N/A	#N/A	[Not Available]	Negative	#N/A	0	931	0	931
TCGA-E2-A1IE-01A-11R-A13Q-07	0	0.2491	0	0	0	0.4983	0	0	0	0	0	0.2491	2.4914	74.7431	2.7406	1.9931	0	3.7372	0	14.6995	8.9692	TCGA-E2-A1IE	BRCA	61	FEMALE	WHITE	Stage IIB	[Not Applicable]	Infiltrating Ductal Carcinoma	[Not Available]	2008	Post (prior bilateral ovariectomy OR >12 mo since LMP with no prior hysterectomy)	-22510	Alive	WITH TUMOR	2362	#N/A	[Not Available]	Distant Metastasis	Liver	#N/A	1810	[Not Available]	Negative	#N/A	0	2362	0	2362
TCGA-A8-A091-01A-11R-A00Z-07	0	0	0	0	0	0.4896	0	0	0	2.2032	0	2.6928	110.543	1012.73	14.4431	1697.43	0.2448	161.567	9.3023	1.9584	16.1567	TCGA-A8-A091	BRCA	61	FEMALE	[Not Available]	Stage IIA	[Not Applicable]	Infiltrating Ductal Carcinoma	[Not Available]	2008	Post (prior bilateral ovariectomy OR >12 mo since LMP with no prior hysterectomy)	-22554	Alive	TUMOR FREE	1004	#N/A	[Not Available]	#N/A	#N/A	#N/A	243	[Not Available]	Negative	#N/A	0	1004	0	1004
TCGA-E2-A1L7-01A-11R-A144-07	0	0	0	0	0	0.4853	0	0	0	0	0	1.4558	15.0431	231.954	0	5.8231	0.9705	0	2.9116	98.5078	11.161	TCGA-E2-A1L7	BRCA	40	FEMALE	WHITE	Stage IIIA	[Not Applicable]	Infiltrating Ductal Carcinoma	[Not Available]	2009	Pre (<6 months since LMP AND no prior bilateral ovariectomy AND not on estrogen replacement)	-14854	Alive	TUMOR FREE	1836	#N/A	[Not Available]	New Primary Tumor	Other, specify	left breast	1619	[Not Available]	Negative	#N/A	0	1836	0	1836
TCGA-D8-A1JP-01A-11R-A13Q-07	0	0	0	0	0	0.4803	0	0	0	0	0.4803	0.4803	0	8.1652	0	0.4803	0.4803	0.4803	4.8031	8.6455	20.1729	TCGA-D8-A1JP	BRCA	73	FEMALE	WHITE	Stage IA	[Not Applicable]	Infiltrating Ductal Carcinoma	[Not Available]	2010	Post (prior bilateral ovariectomy OR >12 mo since LMP with no prior hysterectomy)	-26862	Alive	TUMOR FREE	639	#N/A	[Not Available]	#N/A	#N/A	#N/A	#N/A	[Not Available]	Negative	#N/A	0	639	0	639
TCGA-E2-A14W-01A-11R-A12D-07	0	0.4792	0	0	0	0.4792	0	0	0	0	0	0.4792	2.3958	5.2707	0	2.8749	0.4792	0	0.4792	60.8529	32.1035	TCGA-E2-A14W	BRCA	78	MALE	WHITE	Stage IIA	[Not Applicable]	Infiltrating Ductal Carcinoma	[Not Available]	2008	[Not Available]	-28664	Alive	TUMOR FREE	974	#N/A	[Not Available]	#N/A	#N/A	#N/A	#N/A	[Not Available]	Negative	#N/A	0	974	0	974
TCGA-OL-A5D7-01A-11R-A27Q-07	0	0.9557	0	0	0	0.4778	0	0	0	0	0	0	0.4778	0	0	0	1.9114	0	1.4335	447.736	21.9806	TCGA-OL-A5D7	BRCA	70	FEMALE	BLACK OR AFRICAN AMERICAN	Stage IIA	[Not Applicable]	Infiltrating Ductal Carcinoma	[Not Available]	2009	Post (prior bilateral ovariectomy OR >12 mo since LMP with no prior hysterectomy)	-25643	Alive	TUMOR FREE	1780	#N/A	[Not Available]	#N/A	#N/A	#N/A	#N/A	[Not Available]	Negative	#N/A	0	1780	0	1780
TCGA-LL-A6FQ-01A-11R-A31O-07	0	0	0	0	0	0.471	0	0	0	0	0	0	0.9421	3.2972	0	0.471	0.471	0	14.1309	1.4131	7.0655	TCGA-LL-A6FQ	BRCA	77	FEMALE	BLACK OR AFRICAN AMERICAN	Stage IIIA	[Not Applicable]	Infiltrating Ductal Carcinoma	[Not Available]	2013	Post (prior bilateral ovariectomy OR >12 mo since LMP with no prior hysterectomy)	-28375	Alive	#N/A	80	#N/A	[Not Available]	#N/A	#N/A	#N/A	#N/A	[Not Available]	Negative	#N/A	0	80	0	80
TCGA-E2-A573-01A-11R-A29R-07	0	0	0	0	0	0.4671	0	0	0	0	0	0.4671	0	2.3354	0	0	49.5101	0	7.9403	140.123	21.0184	TCGA-E2-A573	BRCA	48	FEMALE	BLACK OR AFRICAN AMERICAN	Stage IA	[Not Applicable]	Infiltrating Ductal Carcinoma	[Not Available]	2011	Peri (6-12 months since last menstrual period)	-17689	Alive	TUMOR FREE	1062	#N/A	[Not Available]	#N/A	#N/A	#N/A	#N/A	[Not Available]	Negative	#N/A	0	1062	0	1062
TCGA-BH-A0HA-01A-11R-A12P-07	0	0	0	0	0	0.4639	0	0	0	0	0	0	0.4639	2.3194	0	1.3916	0	4.6388	15.7718	9.7414	2.3194	TCGA-BH-A0HA	BRCA	31	FEMALE	WHITE	Stage I	[Not Applicable]	Infiltrating Ductal Carcinoma	[Not Available]	2008	Pre (<6 months since LMP AND no prior bilateral ovariectomy AND not on estrogen replacement)	-11379	Alive	TUMOR FREE	1611	#N/A	[Not Available]	#N/A	#N/A	#N/A	#N/A	[Not Available]	Negative	#N/A	0	1611	0	1611
TCGA-A8-A07J-01A-11R-A00Z-07	0	0	0	0	0	0.46	0	0	0	0	0	0	47.6504	64.8649	2.3002	0	0	0.46	2.3002	3.6803	2.7602	TCGA-A8-A07J	BRCA	35	FEMALE	[Not Available]	Stage IIB	[Not Applicable]	Infiltrating Ductal Carcinoma	[Not Available]	2009	Pre (<6 months since LMP AND no prior bilateral ovariectomy AND not on estrogen replacement)	-12965	Alive	TUMOR FREE	365	#N/A	[Not Available]	#N/A	#N/A	#N/A	#N/A	[Not Available]	Negative	#N/A	0	365	0	365
TCGA-AN-A0AS-01A-11R-A00Z-07	0	0	0	0	0	0.4506	0	0	0	0	0	0.4506	1.3517	0	1.3517	0	3.6044	0	0	1.3517	4.5055	TCGA-AN-A0AS	BRCA	70	FEMALE	WHITE	Stage IIIA	[Not Applicable]	Infiltrating Ductal Carcinoma	[Not Available]	2010	Post (prior bilateral ovariectomy OR >12 mo since LMP with no prior hysterectomy)	-25658	Alive	TUMOR FREE	10	#N/A	[Not Available]	#N/A	#N/A	#N/A	#N/A	[Not Available]	Negative	#N/A	0	10	0	10
TCGA-BH-A0HQ-01A-11R-A034-07	0	0	0	0	0	0.4499	0	0	0	0	0	0.4499	22.4892	5.3985	5.3985	0	0.4499	0	8.9975	13.0463	1.3496	TCGA-BH-A0HQ	BRCA	56	FEMALE	WHITE	Stage IIA	[Not Applicable]	Infiltrating Ductal Carcinoma	[Not Available]	2007	Post (prior bilateral ovariectomy OR >12 mo since LMP with no prior hysterectomy)	-20719	Alive	TUMOR FREE	1121	#N/A	[Not Available]	#N/A	#N/A	#N/A	#N/A	[Not Available]	Negative	#N/A	0	1121	0	1121
TCGA-AR-A1AP-01A-11R-A12P-07	0	0	0	0	0	0.4498	0	0	0	0	0	0.8997	4.9483	27.8902	0.4498	0	0.4498	0	0	14.8448	2.6991	TCGA-AR-A1AP	BRCA	80	FEMALE	WHITE	Stage I	[Not Applicable]	Infiltrating Ductal Carcinoma	[Not Available]	2007	Post (prior bilateral ovariectomy OR >12 mo since LMP with no prior hysterectomy)	-29406	Alive	TUMOR FREE	2856	#N/A	[Not Available]	#N/A	#N/A	#N/A	#N/A	[Not Available]	Negative	#N/A	0	2856	0	2856
TCGA-S3-AA11-01A-31R-A41B-07	0	0	0	0	0	0.4442	0	0	0	2.6655	0	0.4442	12.8832	299.867	1.3327	5.7752	0	0.4442	6.2195	9.3292	75.0777	TCGA-S3-AA11	BRCA	67	FEMALE	BLACK OR AFRICAN AMERICAN	Stage IIA	[Not Applicable]	Infiltrating Ductal Carcinoma	[Not Available]	2013	Post (prior bilateral ovariectomy OR >12 mo since LMP with no prior hysterectomy)	-24813	Alive	TUMOR FREE	421	#N/A	[Not Available]	#N/A	#N/A	#N/A	#N/A	[Not Available]	Negative	#N/A	0	421	0	421
TCGA-S3-AA17-01A-11R-A41B-07	0	0	0	0	0	0.4337	0	0	0	0	0	0.8674	0	92.3778	0	0.4337	0	0	7.3729	53.3449	35.5633	TCGA-S3-AA17	BRCA	64	FEMALE	BLACK OR AFRICAN AMERICAN	Stage IIB	[Not Applicable]	Infiltrating Ductal Carcinoma	[Not Available]	2013	Post (prior bilateral ovariectomy OR >12 mo since LMP with no prior hysterectomy)	-23642	Alive	TUMOR FREE	424	#N/A	[Not Available]	#N/A	#N/A	#N/A	#N/A	[Not Available]	Negative	#N/A	0	424	0	424
TCGA-C8-A12U-01A-11R-A115-07	0	0	0	0	0	0.4325	0	0	0	0	0.4325	13.8408	2.1626	183.823	0.4325	0	0	0	4.7578	1.2976	10.3806	TCGA-C8-A12U	BRCA	46	FEMALE	ASIAN	Stage IIB	[Not Applicable]	Infiltrating Ductal Carcinoma	[Not Available]	2010	Pre (<6 months since LMP AND no prior bilateral ovariectomy AND not on estrogen replacement)	-17045	Alive	TUMOR FREE	385	#N/A	[Not Available]	#N/A	#N/A	#N/A	#N/A	[Not Available]	Negative	#N/A	0	385	0	385
TCGA-C8-A12W-01A-11R-A115-07	0	0	0	0	0	0.4316	0	0	0	0	0.8632	0	12.9478	5.6107	0	0	0.4316	0	0.4316	3.0211	5.1791	TCGA-C8-A12W	BRCA	49	FEMALE	ASIAN	Stage IIIB	[Not Applicable]	Infiltrating Ductal Carcinoma	[Not Available]	2010	Pre (<6 months since LMP AND no prior bilateral ovariectomy AND not on estrogen replacement)	-18140	Alive	TUMOR FREE	385	#N/A	[Not Available]	#N/A	#N/A	#N/A	#N/A	[Not Available]	Negative	#N/A	0	385	0	385
TCGA-A2-A3XV-01A-21R-A239-07	0	0	0	0	0	0.4301	0	0	0	0.8602	0	82.1505	8258	1.7204	6610.75	0	12.043	20.2151	15.4839	0.8602	12.4731	TCGA-A2-A3XV	BRCA	46	FEMALE	BLACK OR AFRICAN AMERICAN	Stage IIA	[Not Applicable]	Infiltrating Ductal Carcinoma	[Not Available]	2011	Pre (<6 months since LMP AND no prior bilateral ovariectomy AND not on estrogen replacement)	-16971	Alive	TUMOR FREE	996	#N/A	[Not Available]	#N/A	#N/A	#N/A	#N/A	[Not Available]	Negative	#N/A	0	996	0	996
TCGA-E2-A1IF-01A-11R-A144-07	0	0	0	0	0	0.4247	0	0	0	0	0	17.8369	3028.84	51.812	66.2514	2.5481	0.8494	0	1.6988	4.6716	6.795	TCGA-E2-A1IF	BRCA	74	FEMALE	WHITE	Stage I	[Not Applicable]	Infiltrating Ductal Carcinoma	[Not Available]	2008	Post (prior bilateral ovariectomy OR >12 mo since LMP with no prior hysterectomy)	-27341	Alive	TUMOR FREE	1138	#N/A	[Not Available]	#N/A	#N/A	#N/A	#N/A	[Not Available]	Negative	#N/A	0	1138	0	1138
TCGA-AN-A0XR-01A-11R-A109-07	0	0	0	0	0	0.4134	0	0	0	0	0	0.8268	51.2526	55.8082	7.4411	0	1.2402	0	5.7875	3.7205	1.6536	TCGA-AN-A0XR	BRCA	55	FEMALE	WHITE	Stage IIIA	[Not Applicable]	Infiltrating Ductal Carcinoma	[Not Available]	2010	Post (prior bilateral ovariectomy OR >12 mo since LMP with no prior hysterectomy)	-20381	Alive	TUMOR FREE	10	#N/A	[Not Available]	#N/A	#N/A	#N/A	#N/A	[Not Available]	Negative	#N/A	0	10	0	10
TCGA-D8-A145-01A-11R-A115-07	0	0.4036	0	0	0	0.4036	0	0	0	0	0.4036	0	46.3882	85.9564	0.8071	0.8071	0	5.2462	8.8781	23.8095	5.2462	TCGA-D8-A145	BRCA	80	FEMALE	WHITE	Stage IIA	[Not Applicable]	Infiltrating Ductal Carcinoma	[Not Available]	2010	Post (prior bilateral ovariectomy OR >12 mo since LMP with no prior hysterectomy)	-29280	Alive	TUMOR FREE	410	#N/A	[Not Available]	#N/A	#N/A	#N/A	#N/A	[Not Available]	Negative	#N/A	0	410	0	410
TCGA-E2-A15H-01A-11R-A12D-07	0	0	0	0	0	0.4024	0	0	0	0	0	4.4266	211.895	51.1066	2.4145	0	0	0.4024	12.0724	12.8773	2.0121	TCGA-E2-A15H	BRCA	38	FEMALE	WHITE	Stage IIA	[Not Applicable]	Infiltrating Ductal Carcinoma	[Not Available]	2009	Pre (<6 months since LMP AND no prior bilateral ovariectomy AND not on estrogen replacement)	-13985	Alive	TUMOR FREE	393	#N/A	[Not Available]	#N/A	#N/A	#N/A	#N/A	[Not Available]	Negative	#N/A	0	393	0	393
TCGA-BH-A0B6-01A-11R-A19W-07	0	0	0	0	0	0.3975	0	0	0	0	0	0.3975	75.9096	29.4162	2.7826	3.5776	0	0.3975	6.7578	9.1429	4.3727	TCGA-BH-A0B6	BRCA	47	FEMALE	WHITE	Stage I	[Not Applicable]	Infiltrating Ductal Carcinoma	[Not Available]	2006	[Not Available]	-17346	Alive	TUMOR FREE	2483	#N/A	[Not Available]	#N/A	#N/A	#N/A	#N/A	[Not Available]	Negative	#N/A	0	2483	0	2483
TCGA-D8-A27P-01A-11R-A16F-07	0	0	0	0	0	0.394	0	0	0	0	0	5.9102	820.229	494.484	16.1545	0	0	0	2.3641	22.8526	4.7281	TCGA-D8-A27P	BRCA	64	FEMALE	WHITE	Stage IA	[Not Applicable]	Infiltrating Ductal Carcinoma	[Not Available]	2011	Post (prior bilateral ovariectomy OR >12 mo since LMP with no prior hysterectomy)	-23576	Alive	TUMOR FREE	49	#N/A	[Not Available]	#N/A	#N/A	#N/A	#N/A	[Not Available]	Negative	#N/A	0	49	0	49
TCGA-A8-A06U-01A-11R-A00Z-07	0	0	0	0	0	0.389	0	0	0	0	1.1669	5.4454	110.055	46.6744	4.6674	0.389	1.9448	7.3901	5.4454	7.0012	3.8895	TCGA-A8-A06U	BRCA	80	FEMALE	[Not Available]	Stage IIB	[Not Applicable]	Infiltrating Ductal Carcinoma	[Not Available]	2008	Post (prior bilateral ovariectomy OR >12 mo since LMP with no prior hysterectomy)	-29525	Dead	TUMOR FREE	#N/A	883	[Not Available]	#N/A	#N/A	#N/A	#N/A	[Not Available]	Negative	#N/A	1	883	0	883
TCGA-BH-A0DT-01A-21R-A12D-07	0	0	0	0	0	0.387	0	0	0	0	0	0	1.5479	2.3218	0.387	0.387	0	0	4.6436	13.5438	14.7046	TCGA-BH-A0DT	BRCA	41	FEMALE	WHITE	Stage IIA	[Not Applicable]	Infiltrating Ductal Carcinoma	[Not Available]	2007	Pre (<6 months since LMP AND no prior bilateral ovariectomy AND not on estrogen replacement)	-15078	Alive	TUMOR FREE	2403	#N/A	[Not Available]	#N/A	#N/A	#N/A	#N/A	[Not Available]	Negative	#N/A	0	2403	0	2403
TCGA-AN-A046-01A-21R-A034-07	0	0.3786	0	0	0	0.3786	0	0	0	0	0	0	4.1651	11.738	0	0	0	1.1359	3.0292	3.4078	7.5729	TCGA-AN-A046	BRCA	68	FEMALE	WHITE	Stage IIA	[Not Applicable]	Infiltrating Ductal Carcinoma	[Not Available]	2010	Post (prior bilateral ovariectomy OR >12 mo since LMP with no prior hysterectomy)	-25158	Alive	TUMOR FREE	10	#N/A	[Not Available]	#N/A	#N/A	#N/A	#N/A	[Not Available]	Negative	#N/A	0	10	0	10
TCGA-A2-A0T1-01A-21R-A084-07	0	0	0	0	0	0.3745	0	0	0	0	0	9.3634	2740.9	1.8727	140.451	1.4981	2.6218	0	0.3745	4.4944	56.9296	TCGA-A2-A0T1	BRCA	55	FEMALE	AMERICAN INDIAN OR ALASKA NATIVE	Stage IIIC	[Not Applicable]	Infiltrating Ductal Carcinoma	[Not Available]	2009	Post (prior bilateral ovariectomy OR >12 mo since LMP with no prior hysterectomy)	-20227	Alive	TUMOR FREE	521	#N/A	[Not Available]	#N/A	#N/A	#N/A	#N/A	[Not Available]	Negative	#N/A	0	521	0	521
TCGA-E9-A22E-01A-11R-A157-07	0	0	0	0	0	0.3744	0	0	0	0	0	0.3744	28.8282	8.9854	0.7488	10.8574	0.3744	0	0.7488	10.483	4.8671	TCGA-E9-A22E	BRCA	56	FEMALE	WHITE	Stage IIIA	[Not Applicable]	Infiltrating Ductal Carcinoma	[Not Available]	2011	Post (prior bilateral ovariectomy OR >12 mo since LMP with no prior hysterectomy)	-20574	Alive	TUMOR FREE	1269	#N/A	[Not Available]	#N/A	#N/A	#N/A	#N/A	[Not Available]	Negative	#N/A	0	1269	0	1269
TCGA-E2-A1IO-01A-11R-A144-07	0	0	0	0	0	0.3708	0	0	0	0	0	1.8539	134.446	28.5503	32.2581	0.3708	0	0	2.9663	20.0223	22.9885	TCGA-E2-A1IO	BRCA	37	FEMALE	WHITE	Stage I	[Not Applicable]	Infiltrating Ductal Carcinoma	[Not Available]	2009	Pre (<6 months since LMP AND no prior bilateral ovariectomy AND not on estrogen replacement)	-13671	Alive	TUMOR FREE	1855	#N/A	[Not Available]	#N/A	#N/A	#N/A	#N/A	[Not Available]	Negative	#N/A	0	1855	0	1855
TCGA-AR-A24W-01A-11R-A169-07	0	0	0	0	0	0.3672	0	0	0	0	0	0.3672	355.362	19.0966	9.9155	1.1017	13.9552	0	4.7741	113.478	3.6724	TCGA-AR-A24W	BRCA	55	FEMALE	WHITE	Stage IIB	[Not Applicable]	Infiltrating Ductal Carcinoma	[Not Available]	2006	Post (prior bilateral ovariectomy OR >12 mo since LMP with no prior hysterectomy)	-20123	Alive	TUMOR FREE	1550	#N/A	[Not Available]	#N/A	#N/A	#N/A	#N/A	[Not Available]	Negative	#N/A	0	1550	0	1550
TCGA-E9-A1R6-01A-11R-A14D-07	0	0	0	0	0	0.3649	0	0	0	0	0	0	0	1.0946	0	0.7297	0	0	5.8379	1.8244	1.8244	TCGA-E9-A1R6	BRCA	63	FEMALE	WHITE	Stage IIA	[Not Applicable]	Infiltrating Ductal Carcinoma	[Not Available]	2010	Post (prior bilateral ovariectomy OR >12 mo since LMP with no prior hysterectomy)	-23347	Alive	TUMOR FREE	339	#N/A	[Not Available]	#N/A	#N/A	#N/A	#N/A	[Not Available]	Negative	#N/A	0	339	0	339
TCGA-E2-A106-01A-11R-A10J-07	0	0	0	0	0	0.3622	0	0	0	3.9841	0.3622	33.6834	9073.35	67.7291	1240.85	10551.2	0.3622	0	0.7244	4.3463	0.3622	TCGA-E2-A106	BRCA	34	FEMALE	ASIAN	Stage IB	[Not Applicable]	Infiltrating Ductal Carcinoma	[Not Available]	2006	Pre (<6 months since LMP AND no prior bilateral ovariectomy AND not on estrogen replacement)	-12528	Alive	TUMOR FREE	2541	#N/A	[Not Available]	#N/A	#N/A	#N/A	#N/A	[Not Available]	Negative	#N/A	0	2541	0	2541
TCGA-A1-A0SH-01A-11R-A084-07	0	0	0	0	0	0.3612	0	0	0	0.3612	0	2.8892	470.481	67.1744	2.8892	3.6115	0.7223	0	3.2504	89.5658	2.5281	TCGA-A1-A0SH	BRCA	39	FEMALE	WHITE	Stage IIA	[Not Applicable]	Infiltrating Ductal Carcinoma	[Not Available]	2006	Pre (<6 months since LMP AND no prior bilateral ovariectomy AND not on estrogen replacement)	-14595	Alive	TUMOR FREE	1437	#N/A	[Not Available]	#N/A	#N/A	#N/A	#N/A	[Not Available]	Negative	#N/A	0	1437	0	1437
TCGA-EW-A1PH-01A-11R-A14M-07	0	0	0	0	0	0.3602	0	0	0	3.9625	0	0	0.3602	0.7205	0	0	27.7378	0	78.5303	248.199	54.3948	TCGA-EW-A1PH	BRCA	52	FEMALE	WHITE	Stage IIA	[Not Applicable]	Infiltrating Ductal Carcinoma	[Not Available]	2010	Post (prior bilateral ovariectomy OR >12 mo since LMP with no prior hysterectomy)	-19073	Alive	TUMOR FREE	607	#N/A	[Not Available]	#N/A	#N/A	#N/A	#N/A	[Not Available]	Negative	#N/A	0	607	0	607
TCGA-A8-A09C-01A-11R-A00Z-07	0	0	0	0	0	0.3569	0	0	0	0	0	2.8554	65.6375	66.3871	1.7846	7.8522	0	1.0708	338.003	2.4984	4.64	TCGA-A8-A09C	BRCA	69	FEMALE	[Not Available]	Stage X	[Not Applicable]	Infiltrating Ductal Carcinoma	[Not Available]	2009	Post (prior bilateral ovariectomy OR >12 mo since LMP with no prior hysterectomy)	-25355	Alive	#N/A	31	#N/A	[Not Available]	#N/A	#N/A	#N/A	#N/A	[Not Available]	[Not Available]	#N/A	0	31	0	31
TCGA-D8-A146-01A-31R-A115-07	0	0	0	0	0	0.356	0	0	0	0	0	13.1719	2261.82	151.655	7.476	0	0.712	0.356	5.696	21.3599	6.764	TCGA-D8-A146	BRCA	57	FEMALE	WHITE	Stage IIA	[Not Applicable]	Infiltrating Ductal Carcinoma	[Not Available]	2010	Post (prior bilateral ovariectomy OR >12 mo since LMP with no prior hysterectomy)	-20861	Alive	TUMOR FREE	643	#N/A	[Not Available]	#N/A	#N/A	#N/A	#N/A	[Not Available]	Negative	#N/A	0	643	0	643
TCGA-A8-A09M-01A-11R-A00Z-07	0	0	0	0	0	0.3557	0	0	0	0	0	0	0	0	0	0	0	0.3557	0.3557	7.8243	22.0503	TCGA-A8-A09M	BRCA	75	FEMALE	[Not Available]	Stage IIIC	[Not Applicable]	Infiltrating Ductal Carcinoma	[Not Available]	2009	Post (prior bilateral ovariectomy OR >12 mo since LMP with no prior hysterectomy)	-27455	Alive	TUMOR FREE	1006	#N/A	[Not Available]	#N/A	#N/A	#N/A	#N/A	[Not Available]	Negative	#N/A	0	1006	0	1006
TCGA-AR-A0TV-01A-21R-A084-07	0	0	0	0	0	0.35	0	0	0	0	0	0	0.35	3.4995	0	0.35	0.35	0	3.8495	0.6999	6.6491	TCGA-AR-A0TV	BRCA	66	FEMALE	[Not Available]	Stage IIA	[Not Applicable]	Infiltrating Ductal Carcinoma	[Not Available]	2005	Post (prior bilateral ovariectomy OR >12 mo since LMP with no prior hysterectomy)	-24279	Alive	TUMOR FREE	2288	#N/A	[Not Available]	#N/A	#N/A	#N/A	#N/A	[Not Available]	Negative	#N/A	0	2288	0	2288
TCGA-B6-A0RM-01A-11R-A084-07	0	0	0	0	0	0.348	0	0	0	0	0	2.4363	84.528	782.737	1.3922	1.0441	0	4.1765	2.0882	0	12.5294	TCGA-B6-A0RM	BRCA	57	FEMALE	BLACK OR AFRICAN AMERICAN	Stage X	[Not Applicable]	Infiltrating Ductal Carcinoma	[Not Available]	1993	Indeterminate (neither Pre or Postmenopausal)	-21047	Dead	TUMOR FREE	#N/A	2373	[Not Available]	#N/A	#N/A	#N/A	#N/A	[Not Available]	[Not Available]	#N/A	1	2373	0	2373
TCGA-D8-A141-01A-11R-A115-07	0	0	0	0	0	0.3404	0	0	0	0	0	0	14.9762	9.8707	0	0.6807	0	0	4.0844	30.6331	8.8496	TCGA-D8-A141	BRCA	40	FEMALE	WHITE	[Not Available]	[Not Applicable]	Infiltrating Ductal Carcinoma	[Not Available]	2010	Indeterminate (neither Pre or Postmenopausal)	-14626	Alive	TUMOR FREE	626	#N/A	[Not Available]	#N/A	#N/A	#N/A	#N/A	[Not Available]	Negative	#N/A	0	626	0	626
TCGA-C8-A12O-01A-11R-A115-07	0	0	0	0	0	0.3378	0	0	1.0844	0	0.3555	0.3555	3.1998	2.4888	0	2.4888	0.7111	2.8443	506.997	4.9775	4.9775	TCGA-C8-A12O	BRCA	50	FEMALE	ASIAN	Stage IIA	[Not Applicable]	Infiltrating Ductal Carcinoma	[Not Available]	2010	Pre (<6 months since LMP AND no prior bilateral ovariectomy AND not on estrogen replacement)	-18506	Alive	TUMOR FREE	385	#N/A	[Not Available]	#N/A	#N/A	#N/A	#N/A	[Not Available]	Negative	#N/A	0	385	0	385
TCGA-AR-A1AH-01A-11R-A12D-07	0	0	0	0	0	0.3354	0	0	0	0	0	0	1.0061	0	0.6708	9.3906	0.3354	0	10.7321	135.828	11.7382	TCGA-AR-A1AH	BRCA	51	FEMALE	WHITE	Stage IIB	[Not Applicable]	Infiltrating Ductal Carcinoma	[Not Available]	2004	Post (prior bilateral ovariectomy OR >12 mo since LMP with no prior hysterectomy)	-18991	Alive	TUMOR FREE	3807	#N/A	[Not Available]	New Primary Tumor	Other, specify	Renal	1136	[Not Available]	Negative	#N/A	0	3807	0	3807
TCGA-A7-A0DA-01A-31R-A115-07	0	0	0	0	0	0.3347	0	0	0	0	0	0	0	0.3347	0	0.3347	2.3427	0	1.004	727.242	4.6854	TCGA-A7-A0DA	BRCA	62	FEMALE	WHITE	Stage IIA	[Not Applicable]	Infiltrating Ductal Carcinoma	[Not Available]	2009	Post (prior bilateral ovariectomy OR >12 mo since LMP with no prior hysterectomy)	-22708	Alive	TUMOR FREE	1085	#N/A	[Not Available]	#N/A	#N/A	#N/A	#N/A	[Not Available]	Negative	#N/A	0	1085	0	1085
TCGA-AN-A041-01A-11R-A034-07	0	0	0	0	0	0.332	0	0	0	0	0	0	0	5.9761	0	0	0	0.332	66.0691	6.9721	2.656	TCGA-AN-A041	BRCA	29	FEMALE	WHITE	Stage IIB	[Not Applicable]	Infiltrating Ductal Carcinoma	[Not Available]	2010	Pre (<6 months since LMP AND no prior bilateral ovariectomy AND not on estrogen replacement)	-10812	Alive	TUMOR FREE	7	#N/A	[Not Available]	#N/A	#N/A	#N/A	#N/A	[Not Available]	Negative	#N/A	0	7	0	7
TCGA-E2-A14Z-01A-11R-A115-07	0	0.4484	0	0	0	0.3318	1.4619	0	0	0	0	0	4.0359	4.4843	1.3453	1.7937	0.8969	0.8969	2.6906	10.7623	74.8879	TCGA-E2-A14Z	BRCA	64	FEMALE	WHITE	Stage I	[Not Applicable]	Infiltrating Ductal Carcinoma	[Not Available]	2009	Post (prior bilateral ovariectomy OR >12 mo since LMP with no prior hysterectomy)	-23682	Dead	WITH TUMOR	#N/A	563	[Not Available]	Distant Metastasis	Bone	#N/A	188	[Not Available]	Negative	#N/A	1	563	1	563
TCGA-AO-A1KP-01A-11R-A13Q-07	0	0	0	0	0	0.3316	0	0	0	0	0.3316	0	4.9736	21.8836	1.3263	5.9683	3.9788	1.6579	2.9841	2.6526	8.9524	TCGA-AO-A1KP	BRCA	77	FEMALE	WHITE	Stage IIA	[Not Applicable]	Infiltrating Ductal Carcinoma	[Not Available]	2003	Post (prior bilateral ovariectomy OR >12 mo since LMP with no prior hysterectomy)	-28247	Alive	TUMOR FREE	2953	#N/A	[Not Available]	#N/A	#N/A	#N/A	#N/A	[Not Available]	Negative	#N/A	0	2953	0	2953
TCGA-A2-A3XS-01A-11R-A22U-07	0	0	0	0	0	0.3283	0	0	0	0	0	0.3283	0	0.3283	0	0	9.1924	0	1.9698	491.793	12.8037	TCGA-A2-A3XS	BRCA	62	FEMALE	BLACK OR AFRICAN AMERICAN	Stage IIIA	[Not Applicable]	Infiltrating Ductal Carcinoma	[Not Available]	2003	Post (prior bilateral ovariectomy OR >12 mo since LMP with no prior hysterectomy)	-23000	Dead	WITH TUMOR	#N/A	1032	[Not Available]	Distant Metastasis	Lung	#N/A	682	[Not Available]	Negative	#N/A	1	1032	1	1032
TCGA-A8-A09Q-01A-11R-A00Z-07	0	0	0	0	0	0.3271	0	0	0	0	0	0.6542	19.9542	285.574	0.6542	6.2152	0	0	0.6542	2.6169	5.2339	TCGA-A8-A09Q	BRCA	83	FEMALE	[Not Available]	Stage IIIB	[Not Applicable]	Infiltrating Ductal Carcinoma	[Not Available]	2008	Post (prior bilateral ovariectomy OR >12 mo since LMP with no prior hysterectomy)	-30528	Alive	WITH TUMOR	761	#N/A	[Not Available]	#N/A	#N/A	#N/A	#N/A	[Not Available]	Positive	#N/A	0	761	0	761
TCGA-A8-A08S-01A-11R-A034-07	0	0	0	0	0	0.3226	0	0	0	0.6452	0	0	0.3226	2.9032	0.3226	14.8387	0.3226	0	8.0645	3.5484	6.129	TCGA-A8-A08S	BRCA	71	FEMALE	[Not Available]	Stage IIA	[Not Applicable]	Infiltrating Ductal Carcinoma	[Not Available]	2008	Post (prior bilateral ovariectomy OR >12 mo since LMP with no prior hysterectomy)	-25994	Alive	TUMOR FREE	1004	#N/A	[Not Available]	#N/A	#N/A	#N/A	#N/A	[Not Available]	Negative	#N/A	0	1004	0	1004
TCGA-A1-A0SJ-01A-11R-A084-07	0	0	0	0	0	0.3182	1.1449	0	0	0	1.4632	1.0974	1.0974	44.6273	0.7316	14.9977	2.1948	0	7.316	16.4609	2.5606	TCGA-A1-A0SJ	BRCA	39	FEMALE	BLACK OR AFRICAN AMERICAN	Stage IIIA	[Not Applicable]	Infiltrating Ductal Carcinoma	[Not Available]	2006	[Not Available]	-14383	Alive	TUMOR FREE	416	#N/A	[Not Available]	#N/A	#N/A	#N/A	#N/A	[Not Available]	Negative	#N/A	0	416	0	416
TCGA-E2-A15T-01A-11R-A115-07	0	0	0	0	0	0.3137	0	0	0	0	0	0.3137	0.3137	43.6044	0	4.3918	0	11.9206	4.7055	4.0781	2.8233	TCGA-E2-A15T	BRCA	65	FEMALE	WHITE	Stage IIA	[Not Applicable]	Infiltrating Ductal Carcinoma	[Not Available]	2010	Post (prior bilateral ovariectomy OR >12 mo since LMP with no prior hysterectomy)	-24054	Alive	TUMOR FREE	1563	#N/A	[Not Available]	#N/A	#N/A	#N/A	#N/A	[Not Available]	Negative	#N/A	0	1563	0	1563
TCGA-E9-A22G-01A-11R-A157-07	0	0	0	1.5548	0	0.311	0	0	0	0	0	0	0.311	0	0.311	0.311	106.352	0	4.3536	1209.67	8.3962	TCGA-E9-A22G	BRCA	47	FEMALE	WHITE	Stage IIA	[Not Applicable]	Infiltrating Ductal Carcinoma	[Not Available]	2011	Post (prior bilateral ovariectomy OR >12 mo since LMP with no prior hysterectomy)	-17300	Alive	TUMOR FREE	1239	#N/A	[Not Available]	#N/A	#N/A	#N/A	#N/A	[Not Available]	Negative	#N/A	0	1239	0	1239
TCGA-E2-A14S-01A-11R-A12D-07	0	0	0	0	0	0.3106	0	0	0	0	0	0	0.3106	4.3485	0	0	0	0	0.3106	1.8636	22.0531	TCGA-E2-A14S	BRCA	65	FEMALE	WHITE	Stage I	[Not Applicable]	Infiltrating Ductal Carcinoma	[Not Available]	2008	Post (prior bilateral ovariectomy OR >12 mo since LMP with no prior hysterectomy)	-23878	Alive	TUMOR FREE	1009	#N/A	[Not Available]	#N/A	#N/A	#N/A	#N/A	[Not Available]	Negative	#N/A	0	1009	0	1009
TCGA-AR-A255-01A-11R-A169-07	0	0	0	0	0	0.3104	0	0	0	0	0	0.6207	6.7846	259.466	1.2415	0.9311	0	0.3104	1.2415	29.4848	0.9311	TCGA-AR-A255	BRCA	62	FEMALE	WHITE	Stage I	[Not Applicable]	Infiltrating Ductal Carcinoma	[Not Available]	2007	Post (prior bilateral ovariectomy OR >12 mo since LMP with no prior hysterectomy)	-22809	Alive	TUMOR FREE	2161	#N/A	[Not Available]	#N/A	#N/A	#N/A	#N/A	[Not Available]	Negative	#N/A	0	2161	0	2161
TCGA-BH-A1FH-01A-12R-A13Q-07	0	0	0	0	0	0.3096	0	0	0	0.9289	0	0.9289	26.9061	156.359	9.5983	3036.46	2.7866	0	6.1924	29.1044	1.5481	TCGA-BH-A1FH	BRCA	47	FEMALE	WHITE	Stage IV	[Not Applicable]	Infiltrating Ductal Carcinoma	[Not Available]	1998	[Not Available]	-17172	Dead	WITH TUMOR	#N/A	1034	[Not Available]	#N/A	#N/A	#N/A	#N/A	[Not Available]	[Not Available]	#N/A	1	1034	1	1034
TCGA-A8-A07R-01A-21R-A034-07	0	0	0	0	0	0.3001	0	0	0	1.2005	0	0	0.3001	0.3001	0	0	1.2005	0	1.5006	379.652	6.0024	TCGA-A8-A07R	BRCA	80	FEMALE	[Not Available]	Stage IIIC	[Not Applicable]	Infiltrating Ductal Carcinoma	[Not Available]	2009	[Not Available]	-29251	Alive	#N/A	273	#N/A	[Not Available]	#N/A	#N/A	#N/A	#N/A	[Not Available]	Positive	#N/A	0	273	0	273
TCGA-AN-A0AJ-01A-11R-A00Z-07	0	0	0	0	0	0.2991	0	0	0	0	0.2991	0.2991	0.5981	108.262	0	0.8972	2.3925	0.2991	33.1963	5.3832	3.2897	TCGA-AN-A0AJ	BRCA	79	FEMALE	WHITE	Stage IIB	[Not Applicable]	Infiltrating Ductal Carcinoma	[Not Available]	2010	Post (prior bilateral ovariectomy OR >12 mo since LMP with no prior hysterectomy)	-29131	Alive	TUMOR FREE	303	#N/A	[Not Available]	#N/A	#N/A	#N/A	#N/A	[Not Available]	Negative	#N/A	0	303	0	303
TCGA-A2-A3XT-01A-11R-A22U-07	0	0	0	0	0	0.2983	0	0	0	0	0	0.5965	0	0	0	0	46.5275	0	0.8948	441.117	75.4581	TCGA-A2-A3XT	BRCA	45	FEMALE	BLACK OR AFRICAN AMERICAN	Stage IIB	[Not Applicable]	Infiltrating Ductal Carcinoma	[Not Available]	2006	Pre (<6 months since LMP AND no prior bilateral ovariectomy AND not on estrogen replacement)	-16649	Alive	TUMOR FREE	2770	#N/A	[Not Available]	#N/A	#N/A	#N/A	#N/A	[Not Available]	Negative	#N/A	0	2770	0	2770
TCGA-BH-A0DV-01A-21R-A12P-07	0	0	0	0	0	0.2976	0	0	0	0	0	0.2976	249.175	28.5693	4.1664	3.2736	0	0.2976	1.488	17.5582	0.8928	TCGA-BH-A0DV	BRCA	54	FEMALE	WHITE	Stage IIIA	[Not Applicable]	Infiltrating Ductal Carcinoma	[Not Available]	2007	Peri (6-12 months since last menstrual period)	-19781	Alive	TUMOR FREE	2064	#N/A	[Not Available]	#N/A	#N/A	#N/A	#N/A	[Not Available]	Negative	#N/A	0	2064	0	2064
TCGA-AR-A252-01A-11R-A169-07	0	0	0	0	0	0.2963	0	0	0	0	0	11.8519	8.8889	23.4074	0.2963	2.6667	0.2963	0.8889	74.963	40.8889	8.5926	TCGA-AR-A252	BRCA	50	FEMALE	WHITE	Stage I	[Not Applicable]	Infiltrating Ductal Carcinoma	[Not Available]	2007	Pre (<6 months since LMP AND no prior bilateral ovariectomy AND not on estrogen replacement)	-18611	Alive	TUMOR FREE	2838	#N/A	[Not Available]	#N/A	#N/A	#N/A	#N/A	[Not Available]	Negative	#N/A	0	2838	0	2838
TCGA-AN-A0G0-01A-11R-A034-07	0	0.2931	0	0	0	0.2931	0	0	0	0	0	0.5862	0	0	0	0.5862	311.57	0	0.2931	1127.87	1.4655	TCGA-AN-A0G0	BRCA	56	FEMALE	WHITE	Stage IIA	[Not Applicable]	Infiltrating Ductal Carcinoma	[Not Available]	2010	Post (prior bilateral ovariectomy OR >12 mo since LMP with no prior hysterectomy)	-20504	Alive	TUMOR FREE	16	#N/A	[Not Available]	#N/A	#N/A	#N/A	#N/A	[Not Available]	Negative	#N/A	0	16	0	16
TCGA-AR-A24S-01A-11R-A169-07	0	0	0	0	0	0.2931	0	0	0	0.8794	0	1.4656	197.565	25.7945	2.0518	0.2931	0	0.8794	1.7587	3.2243	34.5881	TCGA-AR-A24S	BRCA	61	FEMALE	WHITE	Stage I	[Not Applicable]	Infiltrating Ductal Carcinoma	[Not Available]	2006	Post (prior bilateral ovariectomy OR >12 mo since LMP with no prior hysterectomy)	-22587	Alive	#N/A	2976	#N/A	[Not Available]	#N/A	#N/A	#N/A	#N/A	[Not Available]	Negative	#N/A	0	2976	0	2976
TCGA-EW-A1IY-01A-11R-A13Q-07	0	0	0	0	0	0.2822	0	0	0	0	0	7.6189	22.5295	310.119	1.4109	1.6931	0	0	38.9412	50.2285	1.1287	TCGA-EW-A1IY	BRCA	38	FEMALE	ASIAN	Stage I	[Not Applicable]	Infiltrating Ductal Carcinoma	[Not Available]	2009	Pre (<6 months since LMP AND no prior bilateral ovariectomy AND not on estrogen replacement)	-14122	Alive	TUMOR FREE	258	#N/A	[Not Available]	#N/A	#N/A	#N/A	#N/A	[Not Available]	Negative	#N/A	0	258	0	258
TCGA-A7-A26J-01A-11R-A169-07	0	0	0	0	0	0.2815	0	0	0	0	0	0.5629	71.007	17.4513	0.8444	146.928	0	0.5629	27.5843	7.0368	1.6888	TCGA-A7-A26J	BRCA	49	FEMALE	WHITE	Stage IIA	[Not Applicable]	Infiltrating Ductal Carcinoma	[Not Available]	2011	Pre (<6 months since LMP AND no prior bilateral ovariectomy AND not on estrogen replacement)	-17930	Alive	TUMOR FREE	627	#N/A	[Not Available]	#N/A	#N/A	#N/A	#N/A	[Not Available]	Negative	#N/A	0	627	0	627
TCGA-C8-A26W-01A-11R-A16F-07	0	0	0	0	0	0.2783	0	0	0	0.5566	0	0	0.835	23.1005	0.5566	0	0	0	0.5566	9.7412	31.45	TCGA-C8-A26W	BRCA	58	FEMALE	ASIAN	Stage IIB	[Not Applicable]	Infiltrating Ductal Carcinoma	[Not Available]	2010	Post (prior bilateral ovariectomy OR >12 mo since LMP with no prior hysterectomy)	-21391	Alive	TUMOR FREE	381	#N/A	[Not Available]	#N/A	#N/A	#N/A	#N/A	[Not Available]	Negative	#N/A	0	381	0	381
TCGA-AR-A250-01A-31R-A169-07	0	0	0	0	0	0.2759	0	0	0	0.2759	0	0	1.1038	9.9338	0.8278	1.1038	0.2759	34.4923	64.0177	5.5188	2.2075	TCGA-AR-A250	BRCA	58	FEMALE	WHITE	Stage IIA	[Not Applicable]	Infiltrating Ductal Carcinoma	[Not Available]	2006	Post (prior bilateral ovariectomy OR >12 mo since LMP with no prior hysterectomy)	-21309	Alive	TUMOR FREE	2707	#N/A	[Not Available]	#N/A	#N/A	#N/A	#N/A	[Not Available]	Negative	#N/A	0	2707	0	2707
TCGA-AR-A24R-01A-11R-A169-07	0	0	0	0	0	0.2734	0	0	0	0	0	0.8201	0	1.9136	0	0.2734	0.2734	0	4.6473	2.7337	2.4604	TCGA-AR-A24R	BRCA	45	FEMALE	WHITE	Stage IIIA	[Not Applicable]	Infiltrating Ductal Carcinoma	[Not Available]	2006	Pre (<6 months since LMP AND no prior bilateral ovariectomy AND not on estrogen replacement)	-16642	Alive	TUMOR FREE	3430	#N/A	[Not Available]	#N/A	#N/A	#N/A	#N/A	[Not Available]	Negative	#N/A	0	3430	0	3430
TCGA-AO-A128-01A-11R-A10J-07	0	0	0	0	0	0.2714	0	0	0	0	0	0	0	1.3569	0	0	0.2714	0	0	8.9552	18.9959	TCGA-AO-A128	BRCA	61	FEMALE	WHITE	Stage IIA	[Not Applicable]	Infiltrating Ductal Carcinoma	[Not Available]	2002	Post (prior bilateral ovariectomy OR >12 mo since LMP with no prior hysterectomy)	-22340	Alive	TUMOR FREE	3248	#N/A	[Not Available]	#N/A	#N/A	#N/A	#N/A	[Not Available]	Negative	#N/A	0	3248	0	3248
TCGA-BH-A1FE-01A-11R-A13Q-07	0	0	0	0	0	0.2693	0	0	0	0.2693	0	0.5387	102.223	14.5445	17.5072	0	0.808	1.8854	2.9628	22.0861	2.9628	TCGA-BH-A1FE	BRCA	31	FEMALE	WHITE	Stage IIB	[Not Applicable]	Infiltrating Ductal Carcinoma	[Not Available]	1998	[Not Available]	-11650	Dead	WITH TUMOR	#N/A	2273	[Not Available]	#N/A	#N/A	#N/A	#N/A	[Not Available]	[Not Available]	#N/A	1	2273	1	2273
TCGA-C8-A1HE-01A-11R-A13Q-07	0	0	0	0	0	0.2679	0	0	0	0	0	2.6793	390.148	12.5929	4.5549	4.5549	0.8038	0.2679	2.4114	4.019	4.019	TCGA-C8-A1HE	BRCA	59	FEMALE	ASIAN	Stage IIA	[Not Applicable]	Infiltrating Ductal Carcinoma	[Not Available]	2010	Post (prior bilateral ovariectomy OR >12 mo since LMP with no prior hysterectomy)	#N/A	Alive	TUMOR FREE	375	#N/A	[Not Available]	#N/A	#N/A	#N/A	#N/A	[Not Available]	Negative	#N/A	0	375	0	375
TCGA-E9-A1NE-01A-21R-A14M-07	0	0	0	0	0	0.267	0	0	0	0	0	0.267	5.3397	55.2663	0	0	0.534	0.534	5.3397	40.849	5.0728	TCGA-E9-A1NE	BRCA	28	FEMALE	WHITE	Stage IIB	[Not Applicable]	Infiltrating Ductal Carcinoma	[Not Available]	2011	Pre (<6 months since LMP AND no prior bilateral ovariectomy AND not on estrogen replacement)	-10564	Alive	TUMOR FREE	1088	#N/A	[Not Available]	#N/A	#N/A	#N/A	#N/A	[Not Available]	Negative	#N/A	0	1088	0	1088
TCGA-AR-A24L-01A-11R-A169-07	0	0	0	0	0	0.2612	0	0	0	0.2612	0	0.5223	2.0893	29.2505	0	0	0.2612	3.3951	1.567	30.8174	1.8282	TCGA-AR-A24L	BRCA	26	FEMALE	WHITE	Stage IIB	[Not Applicable]	Infiltrating Ductal Carcinoma	[Not Available]	2005	Pre (<6 months since LMP AND no prior bilateral ovariectomy AND not on estrogen replacement)	-9706	Dead	WITH TUMOR	#N/A	2866	[Not Available]	Locoregional Disease	#N/A	#N/A	1414	[Not Available]	Negative	#N/A	1	2866	1	2866
TCGA-C8-A27B-01A-11R-A169-07	0	0	0	0	0	0.261	0	0	0	0	0	0.261	0.5221	0	0	0	0.261	0	1.8272	521.274	25.0587	TCGA-C8-A27B	BRCA	48	FEMALE	ASIAN	Stage IIB	[Not Applicable]	Infiltrating Ductal Carcinoma	[Not Available]	2011	Peri (6-12 months since last menstrual period)	-17763	Alive	TUMOR FREE	439	#N/A	[Not Available]	#N/A	#N/A	#N/A	#N/A	[Not Available]	Negative	#N/A	0	439	0	439
TCGA-BH-A202-01A-11R-A14M-07	0	0	0	0	0	0.2608	0	0	0	0	0	4.9557	166.107	77.4651	4.9557	42.5145	4.9557	0	14.867	122.849	2.0866	TCGA-BH-A202	BRCA	60	FEMALE	WHITE	Stage II	[Not Applicable]	Infiltrating Ductal Carcinoma	[Not Available]	2011	Post (prior bilateral ovariectomy OR >12 mo since LMP with no prior hysterectomy)	-22052	Alive	TUMOR FREE	795	#N/A	[Not Available]	#N/A	#N/A	#N/A	#N/A	[Not Available]	[Not Available]	#N/A	0	795	0	795
TCGA-C8-A1HI-01A-11R-A137-07	0	0	0	0	0	0.2588	0	0	0	0.5176	3.882	1291.15	29491.4	3085.66	767.857	560.041	204.71	0	4.9172	29.5031	4.6584	TCGA-C8-A1HI	BRCA	40	FEMALE	ASIAN	Stage IIIA	[Not Applicable]	Infiltrating Ductal Carcinoma	[Not Available]	2010	Pre (<6 months since LMP AND no prior bilateral ovariectomy AND not on estrogen replacement)	#N/A	Alive	TUMOR FREE	343	#N/A	[Not Available]	#N/A	#N/A	#N/A	#N/A	[Not Available]	Negative	#N/A	0	343	0	343
TCGA-A2-A25F-01A-11R-A169-07	0	0	0	0	0	0.2575	0	0	0	0	0	0	0	0	0	1.0301	0	0	0	121.813	3.3479	TCGA-A2-A25F	BRCA	66	FEMALE	WHITE	Stage IIA	[Not Applicable]	Infiltrating Ductal Carcinoma	[Not Available]	2011	Post (prior bilateral ovariectomy OR >12 mo since LMP with no prior hysterectomy)	-24319	Alive	TUMOR FREE	322	#N/A	[Not Available]	#N/A	#N/A	#N/A	#N/A	[Not Available]	Negative	#N/A	0	322	0	322
TCGA-AR-A0TZ-01A-12R-A084-07	0	0	0	0	0	0.2393	0	0	0	0	0	0.2393	0	108.638	0	0.7179	0	4.3073	5.5037	1.1965	2.6322	TCGA-AR-A0TZ	BRCA	43	FEMALE	WHITE	[Discrepancy]	[Not Applicable]	Infiltrating Ductal Carcinoma	[Not Available]	2004	Pre (<6 months since LMP AND no prior bilateral ovariectomy AND not on estrogen replacement)	-15720	Dead	#N/A	#N/A	3262	[Not Available]	Distant Metastasis	Bone	#N/A	1313	[Not Available]	Negative	#N/A	1	3262	#N/A	3262
TCGA-A2-A25C-01A-11R-A169-07	0	0	0	0	0	0.2206	0	0	0	0	0	0.2206	56.094	144.464	1.5439	0.6617	0	0	7.2783	4.1906	0.8822	TCGA-A2-A25C	BRCA	50	FEMALE	WHITE	Stage IIB	[Not Applicable]	Infiltrating Ductal Carcinoma	[Not Available]	2010	Pre (<6 months since LMP AND no prior bilateral ovariectomy AND not on estrogen replacement)	-18508	Alive	TUMOR FREE	523	#N/A	[Not Available]	#N/A	#N/A	#N/A	#N/A	[Not Available]	Negative	#N/A	0	523	0	523
TCGA-AR-A24V-01A-21R-A169-07	0	0.3441	0	0	0	0.1645	3.1491	0	0	0	0	0	0	1.2182	0	0	0.6091	0	1.5228	1.8273	1.5228	TCGA-AR-A24V	BRCA	52	FEMALE	WHITE	Stage IIB	[Not Applicable]	Infiltrating Ductal Carcinoma	[Not Available]	2006	Peri (6-12 months since last menstrual period)	-19027	Alive	TUMOR FREE	3203	#N/A	[Not Available]	#N/A	#N/A	#N/A	#N/A	[Not Available]	Negative	#N/A	0	3203	0	3203
TCGA-AO-A03M-01B-11R-A10J-07	0	0.2833	0	0	0	0.163	0.8526	0	1.6384	0	0	0	4.2764	0.8018	0.5345	0	0.2673	0	1.3364	13.6309	14.1654	TCGA-AO-A03M	BRCA	29	FEMALE	WHITE	Stage I	[Not Applicable]	Infiltrating Ductal Carcinoma	[Not Available]	2006	Pre (<6 months since LMP AND no prior bilateral ovariectomy AND not on estrogen replacement)	-10616	Alive	TUMOR FREE	1866	#N/A	[Not Available]	#N/A	#N/A	#N/A	#N/A	[Not Available]	Negative	#N/A	0	1866	0	1866
TCGA-A7-A26H-01A-11R-A169-07	0	0	0	0	0.7311	0.094	0.7389	0	0	0	0	0	17.7102	9.1384	0.2611	8.094	0	0.5222	1.0444	4.6997	18.799	TCGA-A7-A26H	BRCA	72	FEMALE	WHITE	Stage IIA	[Not Applicable]	Infiltrating Ductal Carcinoma	[Not Available]	2011	Post (prior bilateral ovariectomy OR >12 mo since LMP with no prior hysterectomy)	-26423	Alive	WITH TUMOR	724	#N/A	[Not Available]	Distant Metastasis	Liver	#N/A	291	[Not Available]	Negative	#N/A	0	724	0	724
TCGA-A8-A09I-01A-22R-A034-07	0	0	0	0	0	0.0561	0.5447	0	0	0	0	0	31.8202	12.4149	1.8022	45.0541	0	0	3.0036	2.0024	2.6031	TCGA-A8-A09I	BRCA	84	FEMALE	[Not Available]	Stage IIA	[Not Applicable]	Infiltrating Ductal Carcinoma	[Not Available]	2008	Post (prior bilateral ovariectomy OR >12 mo since LMP with no prior hysterectomy)	-30711	Alive	TUMOR FREE	1371	#N/A	[Not Available]	#N/A	#N/A	#N/A	#N/A	[Not Available]	Negative	#N/A	0	1371	0	1371
TCGA-BH-A0BZ-01A-31R-A12P-07	0	0.6038	0	0	0	0.003	4.5256	0	0	0	0	0	0	4.2267	0	0	0.3019	0	3.321	5.4344	0.3019	TCGA-BH-A0BZ	BRCA	59	FEMALE	WHITE	Stage IIIA	[Not Applicable]	Infiltrating Ductal Carcinoma	[Not Available]	2007	Post (prior bilateral ovariectomy OR >12 mo since LMP with no prior hysterectomy)	-21856	Alive	TUMOR FREE	2255	#N/A	[Not Available]	#N/A	#N/A	#N/A	#N/A	[Not Available]	Negative	#N/A	0	2255	0	2255
TCGA-A2-A04T-01A-21R-A034-07	0	0	0	0	0	0	0	0	0	0.3477	0	0	0	0	0	0	1.3909	0	0.6955	3436.32	15.3004	TCGA-A2-A04T	BRCA	62	FEMALE	WHITE	Stage IIA	[Not Applicable]	Infiltrating Ductal Carcinoma	[Not Available]	2004	Post (prior bilateral ovariectomy OR >12 mo since LMP with no prior hysterectomy)	-22707	Alive	TUMOR FREE	2246	#N/A	[Not Available]	#N/A	#N/A	#N/A	#N/A	[Not Available]	Negative	#N/A	0	2246	0	2246
TCGA-E2-A158-01A-11R-A12D-07	0	0	0	0	0	0	0	0	0	0	0	0	0	0	0	1.0282	1.3709	0	0	2298.35	0	TCGA-E2-A158	BRCA	43	FEMALE	WHITE	Stage IIA	[Not Applicable]	Infiltrating Ductal Carcinoma	[Not Available]	2009	Pre (<6 months since LMP AND no prior bilateral ovariectomy AND not on estrogen replacement)	-15903	Alive	TUMOR FREE	450	#N/A	[Not Available]	#N/A	#N/A	#N/A	#N/A	[Not Available]	Negative	#N/A	0	450	0	450
TCGA-AR-A0TU-01A-31R-A109-07	0	0	0	0	0	0	1.5652	0	0	0	0	0	0	0.313	0	0	40.6949	0	1.5652	1926.12	2.1913	TCGA-AR-A0TU	BRCA	35	FEMALE	[Not Available]	Stage IIA	[Not Applicable]	Infiltrating Ductal Carcinoma	[Not Available]	2006	Pre (<6 months since LMP AND no prior bilateral ovariectomy AND not on estrogen replacement)	-13039	Alive	TUMOR FREE	709	#N/A	[Not Available]	#N/A	#N/A	#N/A	#N/A	[Not Available]	Negative	#N/A	0	709	0	709
TCGA-C8-A134-01A-11R-A115-07	0	0	0	0	0	0	0	0	0	0	0	0	0	3.8119	0	0	1.906	0	8.6828	1753.71	16.3066	TCGA-C8-A134	BRCA	52	FEMALE	ASIAN	Stage IIA	[Not Applicable]	Infiltrating Ductal Carcinoma	[Not Available]	2010	Peri (6-12 months since last menstrual period)	-19010	Alive	TUMOR FREE	383	#N/A	[Not Available]	#N/A	#N/A	#N/A	#N/A	[Not Available]	Negative	#N/A	0	383	0	383
TCGA-S3-AA10-01A-21R-A41B-07	0	0	0	0	0	0	0	0	0	0	0	0.4254	0.4254	2.9775	0	0	1.7014	0	8.507	1230.97	10.6338	TCGA-S3-AA10	BRCA	65	FEMALE	BLACK OR AFRICAN AMERICAN	Stage IIA	[Not Applicable]	Infiltrating Ductal Carcinoma	[Not Available]	2013	Post (prior bilateral ovariectomy OR >12 mo since LMP with no prior hysterectomy)	-24075	Alive	TUMOR FREE	586	#N/A	[Not Available]	#N/A	#N/A	#N/A	#N/A	[Not Available]	Negative	#N/A	0	586	0	586
TCGA-BH-A1F0-01A-11R-A137-07	0	0	0	0	0	0	0.2151	0	0	2.5809	0	0	0	2.5809	0	0.4302	8.388	0	1.7206	1081.62	5.3769	TCGA-BH-A1F0	BRCA	80	FEMALE	WHITE	Stage IIA	[Not Applicable]	Infiltrating Ductal Carcinoma	[Not Available]	2000	Post (prior bilateral ovariectomy OR >12 mo since LMP with no prior hysterectomy)	-29335	Dead	WITH TUMOR	#N/A	785	[Not Available]	#N/A	#N/A	#N/A	#N/A	[Not Available]	[Not Available]	#N/A	1	785	1	785
TCGA-AN-A0AT-01A-11R-A034-07	0	0	0	0.2883	0	0	0	0	0	0	0	0	0	0	0	2.0179	5.1888	0	7.2067	1058.23	21.0435	TCGA-AN-A0AT	BRCA	62	FEMALE	WHITE	Stage IIA	[Not Applicable]	Infiltrating Ductal Carcinoma	[Not Available]	2010	Post (prior bilateral ovariectomy OR >12 mo since LMP with no prior hysterectomy)	-22798	Alive	TUMOR FREE	10	#N/A	[Not Available]	#N/A	#N/A	#N/A	#N/A	[Not Available]	Negative	#N/A	0	10	0	10
TCGA-E2-A14X-01A-11R-A115-07	0	0	0	0	0	0	0	0	0	0	0	0	0.4993	9.9856	0.4993	0	24.2152	0.2496	6.99	1019.04	10.2353	TCGA-E2-A14X	BRCA	55	FEMALE	BLACK OR AFRICAN AMERICAN	Stage IIIA	[Not Applicable]	Infiltrating Ductal Carcinoma	[Not Available]	2009	Post (prior bilateral ovariectomy OR >12 mo since LMP with no prior hysterectomy)	-20105	Alive	TUMOR FREE	972	#N/A	[Not Available]	#N/A	#N/A	#N/A	#N/A	[Not Available]	Negative	#N/A	0	972	0	972
TCGA-BH-A18T-01A-11R-A12D-07	0	0	0	0	0	0	0	0	0	0	0	0	11.373	0	0	0	0	0	0	1004.41	10.4751	TCGA-BH-A18T	BRCA	70	FEMALE	WHITE	Stage IIA	[Not Applicable]	Infiltrating Ductal Carcinoma	[Not Available]	2003	Post (prior bilateral ovariectomy OR >12 mo since LMP with no prior hysterectomy)	-25674	Dead	WITH TUMOR	#N/A	224	[Not Available]	#N/A	#N/A	#N/A	#N/A	[Not Available]	Negative	#N/A	1	224	1	224
TCGA-A7-A13E-01A-11R-A12P-07	0	0.427	0	0	0	0	3.1686	0	2.3828	0.427	0	0	0	0.8541	0	0	23.0597	0	0.427	918.971	2.1352	TCGA-A7-A13E	BRCA	62	FEMALE	WHITE	Stage IIB	[Not Applicable]	Infiltrating Ductal Carcinoma	[Not Available]	2010	Post (prior bilateral ovariectomy OR >12 mo since LMP with no prior hysterectomy)	-22690	Dead	WITH TUMOR	#N/A	614	[Not Available]	Distant Metastasis	Other, specify	Lung, Bone, Liver, Brain and Skin Nodules	556	[Not Available]	Negative	#N/A	1	614	1	614
TCGA-A8-A07O-01A-11R-A00Z-07	0	0	0	0	0	0	0	0	0	0	0	0	0.8971	0	0	0.299	2.0933	0	4.7847	895.036	7.7751	TCGA-A8-A07O	BRCA	51	FEMALE	[Not Available]	Stage IIA	[Not Applicable]	Infiltrating Ductal Carcinoma	[Not Available]	2009	Post (prior bilateral ovariectomy OR >12 mo since LMP with no prior hysterectomy)	-18870	Alive	TUMOR FREE	304	#N/A	[Not Available]	#N/A	#N/A	#N/A	#N/A	[Not Available]	Negative	#N/A	0	304	0	304
TCGA-A8-A07C-01A-11R-A034-07	0	0	0	0	0	0	0	0	0	0	0	0	0	0.5319	0	0	1.5957	0	1.8617	875.532	2.6596	TCGA-A8-A07C	BRCA	57	FEMALE	[Not Available]	Stage IIA	[Not Applicable]	Infiltrating Ductal Carcinoma	[Not Available]	2008	Post (prior bilateral ovariectomy OR >12 mo since LMP with no prior hysterectomy)	-20820	Alive	TUMOR FREE	1034	#N/A	[Not Available]	#N/A	#N/A	#N/A	#N/A	[Not Available]	Negative	#N/A	0	1034	0	1034
TCGA-AO-A0J6-01A-11R-A034-07	0	0	0	1.7872	0	0	0	0	0	0	0	0.2553	0	0	0	0	57.4456	0	3.0638	823.642	11.7444	TCGA-AO-A0J6	BRCA	61	FEMALE	WHITE	Stage IIA	[Not Applicable]	Infiltrating Ductal Carcinoma	[Not Available]	2008	Post (prior bilateral ovariectomy OR >12 mo since LMP with no prior hysterectomy)	-22462	Alive	TUMOR FREE	1140	#N/A	[Not Available]	#N/A	#N/A	#N/A	#N/A	[Not Available]	Negative	#N/A	0	1140	0	1140
TCGA-E2-A14R-01A-11R-A115-07	0	0	0	0	0	0	0	0	1.8342	0	0	0	0	0.9171	0	0	11.0054	0	1.8342	805.686	41.7288	TCGA-E2-A14R	BRCA	62	FEMALE	WHITE	Stage IIA	[Not Applicable]	Infiltrating Ductal Carcinoma	[Not Available]	2008	Post (prior bilateral ovariectomy OR >12 mo since LMP with no prior hysterectomy)	-22686	Alive	TUMOR FREE	1174	#N/A	[Not Available]	New Primary Tumor	Other, specify	Endometrial	971	[Not Available]	Negative	#N/A	0	1174	0	1174
TCGA-B6-A402-01A-11R-A239-07	0	0	0	0	0	0	0	0	0	0	0	0	0	0.4075	0	0	11.0024	0	2.445	804.808	30.5623	TCGA-B6-A402	BRCA	47	FEMALE	BLACK OR AFRICAN AMERICAN	Stage I	[Not Applicable]	Infiltrating Ductal Carcinoma	[Not Available]	2008	[Unknown]	-17314	Alive	WITH TUMOR	2281	#N/A	[Not Available]	Locoregional Recurrence	Other, specify	breast	1516	[Not Available]	Negative	#N/A	0	2281	0	2281
TCGA-A8-A08R-01A-11R-A034-07	0	0	0	0	0	0	0	0	0	0	0	0	0	0.306	0	0	15.9119	0.918	10.0979	778.458	17.4419	TCGA-A8-A08R	BRCA	52	FEMALE	[Not Available]	Stage IIB	[Not Applicable]	Infiltrating Ductal Carcinoma	[Not Available]	2008	Post (prior bilateral ovariectomy OR >12 mo since LMP with no prior hysterectomy)	-19298	Alive	TUMOR FREE	30	#N/A	[Not Available]	#N/A	#N/A	#N/A	#N/A	[Not Available]	Negative	#N/A	0	30	0	30
TCGA-A2-A3XX-01A-21R-A239-07	0	0	0	0.6855	0	0	0	0	0	0	0	0	2.0564	1.0282	0	0	25.7047	0	3.0846	734.47	26.3902	TCGA-A2-A3XX	BRCA	49	FEMALE	BLACK OR AFRICAN AMERICAN	Stage IIA	[Not Applicable]	Infiltrating Ductal Carcinoma	[Not Available]	2009	Post (prior bilateral ovariectomy OR >12 mo since LMP with no prior hysterectomy)	-17981	Dead	TUMOR FREE	#N/A	1439	[Not Available]	#N/A	#N/A	#N/A	#N/A	[Not Available]	Negative	#N/A	1	1439	0	1439
TCGA-LL-A5YP-01A-21R-A28M-07	0	0	0	0	0	0	0	0	0	0	0	0	0.4521	0	0	1.3562	20.3436	0	24.4123	711.121	6.3291	TCGA-LL-A5YP	BRCA	49	FEMALE	BLACK OR AFRICAN AMERICAN	Stage IIB	[Not Applicable]	Infiltrating Ductal Carcinoma	[Not Available]	2013	Post (prior bilateral ovariectomy OR >12 mo since LMP with no prior hysterectomy)	-18041	Alive	#N/A	450	#N/A	[Not Available]	#N/A	#N/A	#N/A	#N/A	[Not Available]	Negative	#N/A	0	450	0	450
TCGA-AN-A0FX-01A-11R-A034-07	0	0	0	0	0	0	0	0	0	0	0	0	0	5.7416	0	0	2.2329	0	1.5949	701.754	14.673	TCGA-AN-A0FX	BRCA	52	FEMALE	WHITE	Stage IIA	[Not Applicable]	Infiltrating Ductal Carcinoma	[Not Available]	2010	Post (prior bilateral ovariectomy OR >12 mo since LMP with no prior hysterectomy)	-19309	Alive	TUMOR FREE	10	#N/A	[Not Available]	#N/A	#N/A	#N/A	#N/A	[Not Available]	Negative	#N/A	0	10	0	10
TCGA-D8-A1XK-01A-21R-A14M-07	0	0	0	0	0	0	0	0	0	0	0	0	0	0	0	0	0.5431	0	8.6892	701.65	1.0861	TCGA-D8-A1XK	BRCA	55	FEMALE	WHITE	Stage IIB	[Not Applicable]	Infiltrating Ductal Carcinoma	[Not Available]	2010	Post (prior bilateral ovariectomy OR >12 mo since LMP with no prior hysterectomy)	-20092	Alive	TUMOR FREE	441	#N/A	[Not Available]	#N/A	#N/A	#N/A	#N/A	[Not Available]	Negative	#N/A	0	441	0	441
TCGA-B6-A400-01A-11R-A239-07	0	0	0	0	0	0	0	0	0	0	0	0	0	0.2928	0	0	2.3423	0.2928	12.0041	685.112	19.3237	TCGA-B6-A400	BRCA	43	FEMALE	BLACK OR AFRICAN AMERICAN	Stage IIIA	[Not Applicable]	Infiltrating Ductal Carcinoma	[Not Available]	2008	[Unknown]	-16022	Alive	TUMOR FREE	215	#N/A	[Not Available]	#N/A	#N/A	#N/A	#N/A	[Not Available]	Negative	#N/A	0	215	0	215
TCGA-AN-A04D-01A-21R-A034-07	0	0	0	0	0	0	0	0	0	0	0	0	0	0.5759	0	0	2.5914	0	77.1667	613.879	51.5405	TCGA-AN-A04D	BRCA	58	FEMALE	WHITE	Stage IIB	[Not Applicable]	Infiltrating Ductal Carcinoma	[Not Available]	2008	Post (prior bilateral ovariectomy OR >12 mo since LMP with no prior hysterectomy)	-21426	Alive	TUMOR FREE	52	#N/A	[Not Available]	#N/A	#N/A	#N/A	#N/A	[Not Available]	Positive	#N/A	0	52	0	52
TCGA-A2-A0T0-01A-22R-A084-07	0	0	0	1.6382	0	0	0	0	0	0	0	0	1.3106	0	0.3276	0.6553	3.9318	0	1.3106	540.291	8.8465	TCGA-A2-A0T0	BRCA	59	FEMALE	WHITE	Stage IIB	[Not Applicable]	Infiltrating Ductal Carcinoma	[Not Available]	2009	Post (prior bilateral ovariectomy OR >12 mo since LMP with no prior hysterectomy)	-21575	Alive	TUMOR FREE	533	#N/A	[Not Available]	#N/A	#N/A	#N/A	#N/A	[Not Available]	Negative	#N/A	0	533	0	533
TCGA-D8-A27H-01A-11R-A16F-07	0	0	0	0.3424	0	0	0	0	0	0	0	0.3424	0	0	0	0	1.0271	0	0.6848	529.316	13.3527	TCGA-D8-A27H	BRCA	72	FEMALE	WHITE	Stage IIA	[Not Applicable]	Infiltrating Ductal Carcinoma	[Not Available]	2011	Post (prior bilateral ovariectomy OR >12 mo since LMP with no prior hysterectomy)	-26588	Alive	TUMOR FREE	397	#N/A	[Not Available]	#N/A	#N/A	#N/A	#N/A	[Not Available]	Negative	#N/A	0	397	0	397
TCGA-AR-A0TP-01A-11R-A084-07	0	0	0	0	0	0	0	0	0	0	0	0	1.0862	0	0	0	1.4482	0	0.7241	509.051	8.6894	TCGA-AR-A0TP	BRCA	43	FEMALE	WHITE	Stage IIA	[Not Applicable]	Infiltrating Ductal Carcinoma	[Not Available]	2003	Pre (<6 months since LMP AND no prior bilateral ovariectomy AND not on estrogen replacement)	-15812	Alive	TUMOR FREE	4275	#N/A	[Not Available]	#N/A	#N/A	#N/A	#N/A	[Not Available]	Negative	#N/A	0	4275	0	4275
TCGA-E2-A14N-01A-31R-A137-07	0	0	0	0	0	0	0	0	0	0	0	0.4467	0	0	0	0	58.968	0	4.0205	504.802	11.1682	TCGA-E2-A14N	BRCA	37	FEMALE	WHITE	Stage IIB	[Not Applicable]	Infiltrating Ductal Carcinoma	[Not Available]	2007	Pre (<6 months since LMP AND no prior bilateral ovariectomy AND not on estrogen replacement)	-13743	Alive	TUMOR FREE	1434	#N/A	[Not Available]	#N/A	#N/A	#N/A	#N/A	[Not Available]	Negative	#N/A	0	1434	0	1434
TCGA-BH-A1F6-01A-11R-A13Q-07	0	0	0	0	0	0	0	0	0	0	0	0	0	1.4144	0	0	0.4715	0	6.1292	499.764	7.0721	TCGA-BH-A1F6	BRCA	51	FEMALE	WHITE	[Not Available]	[Not Applicable]	Infiltrating Ductal Carcinoma	[Not Available]	1996	[Not Available]	-18691	Dead	#N/A	#N/A	2965	[Not Available]	#N/A	#N/A	#N/A	#N/A	[Not Available]	[Not Available]	#N/A	1	2965	#N/A	2965
TCGA-C8-A1HJ-01A-11R-A13Q-07	0	0	0	0	0	0	0	0	0	0	0	0	0.3501	0	0	0	5.6022	0	12.2549	489.496	30.8123	TCGA-C8-A1HJ	BRCA	53	FEMALE	ASIAN	Stage IIA	[Not Applicable]	Infiltrating Ductal Carcinoma	[Not Available]	2010	Peri (6-12 months since last menstrual period)	-19629	Alive	TUMOR FREE	5	#N/A	[Not Available]	#N/A	#N/A	#N/A	#N/A	[Not Available]	Negative	#N/A	0	5	0	5
TCGA-AR-A251-01A-12R-A169-07	0	0	0	0	0	0	0.3762	0	0.3688	2.0488	0	0	1.1175	0.3725	0.1863	0.5588	0.745	0	0.1863	465.256	68.913	TCGA-AR-A251	BRCA	51	FEMALE	WHITE	Stage IIIA	[Not Applicable]	Infiltrating Ductal Carcinoma	[Not Available]	2006	Pre (<6 months since LMP AND no prior bilateral ovariectomy AND not on estrogen replacement)	-18771	Alive	TUMOR FREE	3030	#N/A	[Not Available]	#N/A	#N/A	#N/A	#N/A	[Not Available]	Negative	#N/A	0	3030	0	3030
TCGA-E2-A1LI-01A-12R-A157-07	0	0	0	0	0	0	0	0	0	0	0	0.3005	1.5024	0	0	0	2.7043	0	0.601	429.688	29.7476	TCGA-E2-A1LI	BRCA	57	FEMALE	WHITE	Stage IIB	[Not Applicable]	Infiltrating Ductal Carcinoma	[Not Available]	2003	Post (prior bilateral ovariectomy OR >12 mo since LMP with no prior hysterectomy)	-21064	Alive	TUMOR FREE	3121	#N/A	[Not Available]	#N/A	#N/A	#N/A	#N/A	[Not Available]	Close	#N/A	0	3121	0	3121
TCGA-A2-A0D2-01A-21R-A034-07	0	0	0	0	0	0	0	0	0	0.3696	0	0	0	1.8481	0	0.3696	5.5443	0	0.3696	417.298	21.8074	TCGA-A2-A0D2	BRCA	45	FEMALE	WHITE	Stage IIA	[Not Applicable]	Infiltrating Ductal Carcinoma	[Not Available]	2008	Pre (<6 months since LMP AND no prior bilateral ovariectomy AND not on estrogen replacement)	-16623	Alive	TUMOR FREE	1027	#N/A	[Not Available]	#N/A	#N/A	#N/A	#N/A	[Not Available]	Negative	#N/A	0	1027	0	1027
TCGA-AO-A0J4-01A-11R-A034-07	0	0	0	0	0	0	0	0	0	0	0	0	0	3.8238	0	0.2549	17.3348	0	6.8829	412.466	14.5306	TCGA-AO-A0J4	BRCA	41	FEMALE	BLACK OR AFRICAN AMERICAN	Stage IA	[Not Applicable]	Infiltrating Ductal Carcinoma	[Not Available]	2009	Pre (<6 months since LMP AND no prior bilateral ovariectomy AND not on estrogen replacement)	-15052	Alive	TUMOR FREE	1587	#N/A	[Not Available]	#N/A	#N/A	#N/A	#N/A	[Not Available]	Negative	#N/A	0	1587	0	1587
TCGA-B6-A0I6-01A-11R-A034-07	0	0	0	0	0	0	0	0	0	0	0	0	0	0	0	0	0	0	0	368.488	68.0851	TCGA-B6-A0I6	BRCA	49	FEMALE	BLACK OR AFRICAN AMERICAN	Stage IIA	[Not Applicable]	Infiltrating Ductal Carcinoma	[Not Available]	1990	Indeterminate (neither Pre or Postmenopausal)	-18014	Dead	WITH TUMOR	#N/A	991	[Not Available]	Distant Metastasis	Other, specify	Skin and bone	859	[Not Available]	Negative	#N/A	1	991	1	991
TCGA-OL-A66I-01A-21R-A29R-07	0	0	0	0	0	0	0	0	0	0	0	0	0	0.8346	0	0	0	0	2.0866	367.658	40.4799	TCGA-OL-A66I	BRCA	36	FEMALE	BLACK OR AFRICAN AMERICAN	Stage IIA	[Not Applicable]	Infiltrating Ductal Carcinoma	[Not Available]	2008	[Not Evaluated]	-13458	Alive	TUMOR FREE	714	#N/A	[Not Available]	#N/A	#N/A	#N/A	#N/A	[Not Available]	Negative	#N/A	0	714	0	714
[truncated: 69,594 more rows]
[truncated: 4 more columns]

## Sheet: CESC
gene_id	UGT1A10|54575	UGT1A1|54658	UGT1A3|54659	UGT1A4|54657	UGT1A5|54579	UGT1A6|54578	UGT1A7|54577	UGT1A8|54576	UGT1A9|54600	UGT2A1|10941	UGT2A3|79799	UGT2B10|7365	UGT2B11|10720	UGT2B15|7366	UGT2B28|54490	UGT2B4|7363	UGT2B7|7364	UGT3A1|133688	UGT3A2|167127	UGT8|7368		bcr_patient_barcode	type	age_at_initial_pathologic_diagnosis	gender	race	ajcc_pathologic_tumor_stage	clinical_stage	histological_type	histological_grade	initial_pathologic_dx_year	menopause_status	birth_days_to	vital_status	tumor_status	last_contact_days_to	death_days_to	cause_of_death	new_tumor_event_type	new_tumor_event_site	new_tumor_event_site_other	new_tumor_event_dx_days_to	treatment_outcome_first_course	margin_status	residual_tumor	OS	OS.time	DSS	DSS.time
[truncated: 304 more rows]
[truncated: 5 more columns]

[truncated: 29 more sheets: CHOL, COAD, DLBC, ESCA, GBM, HNSC, KICH, KIRC, KIRP, LAML, LGG, LIHC, LUAD, LUSC, MESO, OV, PAAD, PCPG, PRAD, READ …]
