# Supplementary material for: The Expression Profiles and Deregulation of UDP-Glycosyltransferase (UGT) Genes in Human Cancers and Their Association with Clinical Outcomes
Source: Cancers (Basel). 2021 Sep 6;13(17):4491. doi: 10.3390/cancers13174491 (PMC8430925; doi:10.3390/cancers13174491)
Supplement: Supplementary file 1 [file cancers-13-04491-s001.zip › Table S2.xlsx]

## Sheet: 33 TCGA cancer
	RSEM levels											RSEM levels										RSEM levels											RSEM levels											RSEM levels
	ACC (78 samples)				Logrank test			Bonferroni correction				BLCA (398 samples)				Logrank test			Bonferroni correction			BRCA (1080 samples)					logrank test			Bonferroni correction			CESC (304 samples)					logrank test			Bonferroni correction			CHOL (35 samples)					logrank test
	No. of tumours expressed	Median	Mean	Std. Deviation	p value	harzard ratiosratios	95% CI	Adjusted p values				No. of tumours expressed	Median	Mean	Std. Deviation	p value	harzard ratiosratios	95% CI	Adjusted p values				No. of tumours expressed	Median	Mean	Std. Deviation	p value	harzard ratiosratios	95% CI	Adjusted p values				No. of tumours expressed	Median	Mean	Std. Deviation	p value	harzard ratiosratio	95% CI	Adjusted p values				No. of tumours expressed	Median	Mean	Std. Deviation	p value
UGT1A1	22	3	13	19	0.0228403	3.174	1.457 to 6.915	0.319764			UGT1A1	343	48	275	634	0.107983	1.275	0.9480 to 1.715	1			UGT1A1	132	0.9	5	21	0.496391	0.84	0.4891 to 1.443	1			UGT1A1	131	3	11	27	0.583899	1.136	0.7123 to 1.811	1			UGT1A1	30	40	383	873	0.087476
UGT1A3	5	2	3	3							UGT1A3	278	6	11	28	0.320571	1.162	0.8637 to 1.563	1			UGT1A3	44	2	6	16							UGT1A3	77	3	4	5	0.0180649	0.57	0.3400 to 0.9556	0.361297			UGT1A3	27	17	41	57	0.981658
UGT1A4	0										UGT1A4	211	3	6	12	0.00334237	1.555	1.155 to 2.095	0.0668474			UGT1A4	49	1	2	3							UGT1A4	64	2	5	7	0.313549	0.7708	0.4487 to 1.324	1			UGT1A4	25	15	201	343	0.28826
UGT1A5	0										UGT1A5	178	2	4	5	0.502898	1.106	0.8224 to 1.488	1			UGT1A5	24	1	2	3							UGT1A5	48	1	2	2	0.825454	1.072	0.5844 to 1.967	1			UGT1A5	17	6	10	11	0.862582
UGT1A6	57	12	232	533	1.96421e-05	7.117	3.333 to 15.20	0.00027499			UGT1A6	395	2124	3441	3926	0.252326	1.189	0.8838 to 1.599	1			UGT1A6	551	2	129	851	0.126914	0.7793	0.5658 to 1.073	1			UGT1A6	289	98	780	1837	0.196417	0.7333	0.4604 to 1.168	1			UGT1A6	35	764	2495	4431	0.388071
UGT1A7	44	32	375	1059	0.00115501	3.516	1.658 to 7.455	0.0161701			UGT1A7	235	10	55	103	0.971272	1.005	0.7473 to 1.353	1			UGT1A7	163	2	90	618	0.530186	1.158	0.7475 to 1.795	1			UGT1A7	141	14	512	1600	0.174167	0.7251	0.4549 to 1.156	1			UGT1A7	16	3	88	263	0.0428629
UGT1A8	23	4	21	67	0.0430683	2.601	1.203 to 5.624	0.602957			UGT1A8	311	43	450	1078	0.972987	0.9949	0.7396 to 1.338	1			UGT1A8	103	2	9	27	0.226856	1.544	0.8557 to 2.784	1			UGT1A8	93	5	26	58	0.0296782	0.5994	0.3654 to 0.9831	0.593565			UGT1A8	25	38	557	1164	0.722884
UGT1A9	25	20	36	41	0.0130135	3.492	1.620 to 7.527	0.182189			UGT1A9	365	303	476	526	0.0353364	1.374	1.021 to 1.849	0.706728			UGT1A9	181	3	34	135	0.287918	1.296	0.8357 to 2.009	1			UGT1A9	182	24	121	259	0.552444	0.8684	0.5452 to 1.383	1			UGT1A9	34	218	1098	2311	0.904306
UGT1A10	18	3	9	14	0.256621	0.6166	0.2302 to 1.651	1			UGT1A10	335	651	2366	3692	0.40007	1.135	0.8442 to 1.527	1			UGT1A10	119	2	39	166	0.174429	1.5	0.9089 to 2.475	1			UGT1A10	87	9	197	495	0.559499	1.146	0.7175 to 1.830	1			UGT1A10	30	144	855	1457	0.328542
UGT2A1	33	1	2	2	0.00983152	3.075	1.462 to 6.469	0.137641			UGT2A1	203	1	29	297	0.0317722	1.383	1.028 to 1.861	0.635443			UGT2A1	197	0.8	18	194	0.416957	1.197	0.7934 to 1.807	1			UGT2A1	131	2	101	485	0.0535592	0.6332	0.3967 to 1.011	1			UGT2A1	25	1	3	3	0.710079
UGT2A3	42	2	192	1046	0.00972304	2.802	1.334 to 5.886	0.136123			UGT2A3	156	2	267	1270	0.0182654	1.425	1.058 to 1.919	0.365308			UGT2A3	171	0.5	2	5	0.944788	0.9845	0.6299 to 1.539	1			UGT2A3	55	0.8	137	545	0.524654	1.215	0.6890 to 2.142	1			UGT2A3	34	765	1181	1662	0.0279624
UGT2B4	24	2	7	12	0.23436	1.716	0.7750 to 3.799	1			UGT2B4	162	1	6	13	0.00937397	1.484	1.103 to 1.996	0.187479			UGT2B4	677	2	276	2260	0.550768	1.102	0.8004 to 1.518	1			UGT2B4	64	1	5	9	0.422158	1.288	0.7259 to 2.286	1			UGT2B4	34	88	1444	3350	0.25721
UGT2B7	18	1	4	12	0.311738	1.71	0.7011 to 4.171	1			UGT2B7	314	15	106	264	0.00363304	1.549	1.151 to 2.086	0.0726608			UGT2B7	680	1	18	99	0.608331	0.9196	0.6674 to 1.267	1			UGT2B7	214	3	113	962	0.101881	1.476	0.9264 to 2.351	1			UGT2B7	34	210	914	1893	0.69209
UGT2B10	4	0.6	0.5	0.1							UGT2B10	160	1	6	28	0.0451137	1.353	1.005 to 1.820	0.902273			UGT2B10	540	1	19	80	0.975435	0.995	0.7224 to 1.370	1			UGT2B10	70	1	3	8	0.107162	1.656	0.9689 to 2.829	1			UGT2B10	32	14	222	440	0.272162
UGT2B11	21	2	7	11	0.969025	0.9839	0.4321 to 2.240	1			UGT2B11	176	1	8	26	0.00562982	1.525	1.134 to 2.052	0.112596			UGT2B11	825	11	1153	4784	0.895758	1.022	0.7414 to 1.408	1			UGT2B11	49	0.5	2	4	0.974312	1.01	0.5442 to 1.875	1			UGT2B11	35	32	296	972	0.876418
UGT2B15	8	1	2	0.9							UGT2B15	317	6	188	1125	0.000533641	1.691	1.257 to 2.276	0.0106728			UGT2B15	965	14	89	265	0.481919	1.122	0.8143 to 1.546	1			UGT2B15	211	2	17	71	0.923959	1.023	0.6423 to 1.629	1			UGT2B15	34	666	2163	3713	0.499166
UGT2B28	7	2	4	4							UGT2B28	221	3	10	19	0.0193113	1.427	1.061 to 1.919	0.386227			UGT2B28	622	2	200	1208	0.498354	1.117	0.8110 to 1.538	1			UGT2B28	83	0.8	2	5	0.0271746	0.5871	0.3465 to 0.9946	0.543492			UGT2B28	29	1	7	18	0.441049
UGT3A1	18	1	19	68	0.892917	0.9431	0.3958 to 2.247	1			UGT3A1	90	0.9	7	37	0.147506	1.313	0.9313 to 1.851	1			UGT3A1	393	0.8	3	12	0.205464	1.247	0.8951 to 1.737	1			UGT3A1	64	0.7	18	77	0.80682	1.076	0.6070 to 1.906	1			UGT3A1	27	17	79	144	0.41579
UGT3A2	69	7	25	39	0.443669	0.7491	0.3564 to 1.574	1			UGT3A2	343	5	28	134	0.0586536	1.331	0.9898 to 1.791	1			UGT3A2	979	4	29	187	0.0269737	1.441	1.046 to 1.984	0.458552			UGT3A2	247	2	7	28	0.152002	1.409	0.8849 to 2.244	1			UGT3A2	29	7	135	504	0.38809
UGT8	46	2	18	52	0.556403	0.8013	0.3818 to 1.682	1			UGT8	340	11	74	150	0.417302	0.885	0.6581 to 1.190	1			UGT8	1046	11	94	253	0.51037	1.113	0.8083 to 1.533	1			UGT8	291	89	192	259	0.159289	1.394	0.8733 to 2.224	1			UGT8	32	24	112	175	0.410803
[truncated: 254 more columns]
