# Supplementary material for: The Expression Profiles and Deregulation of UDP-Glycosyltransferase (UGT) Genes in Human Cancers and Their Association with Clinical Outcomes
Source: Cancers (Basel). 2021 Sep 6;13(17):4491. doi: 10.3390/cancers13174491 (PMC8430925; doi:10.3390/cancers13174491)
Supplement: Supplementary file 1 [file cancers-13-04491-s001.zip › Table S3.xlsx]

## Sheet: BRCA
Gene	TCGA-E2-A1L7-11A-33R-A144-07	TCGA-BH-A0BC-11A-22R-A089-07	TCGA-E9-A1N9-11A-71R-A14D-07	TCGA-BH-A18P-11A-43R-A12D-07	TCGA-BH-A1FB-11A-33R-A13Q-07	TCGA-E9-A1RB-11A-33R-A157-07	TCGA-BH-A1EO-11A-31R-A137-07	TCGA-GI-A2C8-11A-22R-A16F-07	TCGA-E9-A1NA-11A-33R-A144-07	TCGA-BH-A0H9-11A-22R-A466-07	TCGA-BH-A0DZ-11A-22R-A089-07	TCGA-BH-A0BV-11A-31R-A089-07	TCGA-BH-A1EV-11A-24R-A137-07	TCGA-BH-A1EN-11A-23R-A13Q-07	TCGA-BH-A209-11A-42R-A157-07	TCGA-BH-A1FJ-11B-42R-A13Q-07	TCGA-BH-A0DL-11A-13R-A115-07	TCGA-AC-A2FF-11A-13R-A17B-07	TCGA-A7-A13E-11A-61R-A12P-07	TCGA-BH-A18V-11A-52R-A12D-07	TCGA-E2-A158-11A-22R-A12D-07	TCGA-BH-A1FG-11B-12R-A13Q-07	TCGA-A7-A0DB-11A-33R-A089-07	TCGA-BH-A0BS-11A-11R-A12P-07	TCGA-BH-A0HK-11A-11R-A089-07	TCGA-BH-A0DK-11A-13R-A089-07	TCGA-BH-A0BT-11A-21R-A12P-07	TCGA-BH-A0BJ-11A-23R-A089-07	TCGA-E2-A15K-11A-13R-A12P-07	TCGA-BH-A1FU-11A-23R-A14D-07	TCGA-BH-A0E1-11A-13R-A089-07	TCGA-A7-A0CE-11A-21R-A089-07	TCGA-BH-A1F0-11B-23R-A137-07	TCGA-BH-A0BW-11A-12R-A115-07	TCGA-AC-A2FB-11A-13R-A17B-07	TCGA-BH-A0AY-11A-23R-A089-07	TCGA-E9-A1RD-11A-33R-A157-07	TCGA-BH-A0BQ-11A-33R-A115-07	TCGA-BH-A1EU-11A-23R-A137-07	TCGA-BH-A0DQ-11A-12R-A089-07	TCGA-E2-A15I-11A-32R-A137-07	TCGA-E2-A1LS-11A-32R-A157-07	TCGA-BH-A0HA-11A-31R-A12P-07	TCGA-E9-A1N6-11A-32R-A144-07	TCGA-BH-A1FC-11A-32R-A13Q-07	TCGA-BH-A1F2-11A-32R-A13Q-07	TCGA-BH-A18J-11A-31R-A12D-07	TCGA-BH-A1FN-11A-34R-A13Q-07	TCGA-BH-A1FD-11B-21R-A13Q-07
UGT1A1|54658	0	0	2.57	0	0	1	0	0	0	0	0	4.69	0	0	0	0	0	0	1.13	0	0	0	0	0	0	0	2.15	0	1	1	0	0	1.07	0	0	0	1.12	0	0	8.72	0	0	0	0	1	1.14	0	0	0
UGT1A10|54575	0	0	0	0	0	0	1.19	0	0	0	0	4.47	0	0	0	0	0	0	0	0	0	0	0	0	9.77	2.58	0	0	0	0	6.41	0	0	2.67	0	14.7	0	0	0	0	0	0	0	0	0	0	0	0	0
UGT1A3|54659	0	0	0	0	0	0	0	0	0	0	0	0	0	0	1.98	0	0	0	0	0	0	0	0	3.21	0	0	0	0	0	0	0	0	0	0	0	0	0	0	0	0	0	0	0	0	0	0	0	0	0
UGT1A4|54657	0	0	0	0	0	0	0	0	0	0	0	0	0	0	0	0	4	0	0	0	0	0	0	3.12	0	0	0	0	0	0	0	0	0	0	0	0	0	0	0	0	0	0	0	6.19	0	0	0	0	0
UGT1A5|54579	0	0	0	0	0	0	0	0	0	0	0	0	0	0	0	0	0	0	0	0	0	0	0	0	0	0	0	0	0	0	0	0	0	0	0	0	0	0	0	0	0	0	0	0	0	0	0	0	0
UGT1A6|54578	0	254.01	0	8	5	2	7.24	0	4	10	2	26.72	1	13	1	0	0	2	5.59	5	0	0	94.5	29.42	171.04	89.67	14.63	65.83	14.29	1	52.85	140.47	1.66	1.33	1.53	158.75	0	2.11	1.61	37.57	3	15	0	7.58	8.39	9.79	4	1	4
UGT1A7|54577	0	105.23	10.43	0	0	0	9.56	1	0	0	0	98.08	0	0	2.02	21	0	0	44.19	0	0	0	70.94	22.75	59.99	29.42	13.31	34.73	9.71	0	26.5	22.17	7.27	0	3.47	82.42	13.37	28.23	3.39	55.09	0	0	0	3.22	12.61	0	0	0	0
UGT1A8|54576	0	5.18	0	0	0	0	0	0	0	0	0	0	0	0	0	5	0	0	0	0	0	0	0	0	24.19	5.09	3.11	0	0	0	5.24	3.56	0	0	0	14.4	0	0	0	2.62	0	0	0	0	0	0	0	0	0
UGT1A9|54600	0	7.58	0	0	0	0	0	0	0	0	0	16.04	0	0	0	0	0	0	11.09	0	0	0	26.56	12.49	0	23.25	7.79	16.43	0	0	0	1.81	0	0	0	14.74	14.52	13.66	0	0	0	0	0	0	0	6.07	0	0	0
UGT2A1|10941	0	0	0	0	0	1	3	0	0	0	0	0	0	0	0	0	0	0	0	0	0	0	0	0	1	0	0	0	0	0	1	0	0	0	0	0	0	0	0	1	0	0	0	0	0	0	0	0	0
UGT2A3|79799	1	3	1	0	0	0	0	0	0	0	0	0	0	0	0	0	1	0	0	0	0	0	0	0	0	5	0	0	0	0	0	0	0	3	1	0	0	6	0	0	1	0	0	0	0	0	0	0	0
UGT2B10|7365	0	0	383	1	36	2	0	0	1	0	25	1	2	4	4	8	4	119	1	4	0	16	0	0	1	546	1	2	3	1	0	16	1	0	2	0	6	0	5	4	0	0	0	0	4	8	8	0	1
UGT2B11|10720	79.97	81	48949.9	69.9	3436.88	349.52	0	0	199.77	0	2658.26	223.73	74.83	1125.04	710.27	2622.8	773.75	14706	110.82	282.97	23.93	2020.26	1	458.81	317.15	85784.8	314.89	235.34	11	18	2	2900.52	381.68	13	51.87	183	1183.03	422.18	485.71	732.93	32.97	2	29	87	1109.38	1005.82	1374.91	5	33.94
UGT2B15|7366	2506	169	56	25	39	268	0	0	6	0	772	212	54	29	86	139	404	474	20	511	0	293	0	1625	49	992	287	360	53	431	141	615	65	9	127	40	203	75	10	1847	114	0	16	51	68	370	31	7	61
UGT2B28|54490	3	1	22822	39	3092	111	0	0	4	0	2218	76	2	183	85	568	58	5050	3	440	0	81	0	35	5	54583	288	2	0	3	2	57	5	7	5	13	12	100	138	42	25	1	2	5	632	141	264	0	0
UGT2B4|7363	4	0	11	207	5	61	40	1	8	28	2	15	32	43	11	0	44	30	182	5	22	6	60	12	0	7	2	0	0	12	1	47	66	0	29	83	22	3	3	19	5	118	3	25	16	149	0	0	54
UGT2B7|7364	46	46	402	12	48	8	1	0	37	0	27	26	33	11	54	70	27	91	2	49	3	27	2	20	27	485	9	99	22	7	8	2	51	4	30	1	44	8	81	18	0	0	11	64	2	5	19	94	1
UGT3A1|133688	0	0	0	1	15	0	1	621	0	0	1	1	0	1	0	0	0	11	0	0	0	0	0	0	6	11	6	0	0	0	0	0	0	0	0	0	0	0	1	2	1	0	0	0	0	0	1	0	0
UGT3A2|167127	13	2	17	4	83	13	0	0	2	0	20	33	56	2	25	13	26	108	4	7	0	10	3	52	24	93	47	11	6	4	46	18	4	10	11	10	2	24	2	19	9	0	19	6	12	9	7	21	0
UGT8|7368	303	272	247	214	387	444	1	0	238	2	246	1212	561	221	895	475	433	761	54	80	326	306	12	598	204	366	371	827	97	200	556	221	262	430	385	186	229	366	260	366	130	46	797	507	79	227	459	435	109
[truncated: 177 more columns]

## Sheet: COAD
Gene	TCGA-A6-5662-11A-01R-1653-07	TCGA-AZ-6598-11A-01R-1774-07	TCGA-AA-3663-11A-01R-1723-07	TCGA-AZ-6605-11A-01R-1839-07	TCGA-A6-2682-11A-01R-A32Z-07	TCGA-AA-3713-11A-01R-1723-07	TCGA-AA-3511-11A-01R-1839-07	TCGA-AZ-6600-11A-01R-1774-07	TCGA-AA-3662-11A-01R-1723-07	TCGA-AA-3496-11A-01R-1839-07	TCGA-AZ-6601-11A-01R-1774-07	TCGA-AA-3697-11A-01R-1723-07	TCGA-A6-5665-11A-01R-1653-07	TCGA-AA-3655-11A-01R-1723-07	TCGA-A6-5659-11A-01R-1653-07	TCGA-A6-2675-11A-01R-1723-07	TCGA-A6-2684-11A-01R-A32Z-07	TCGA-F4-6704-11A-01R-1839-07	TCGA-AZ-6603-11A-02R-1839-07	TCGA-AA-3489-11A-01R-1839-07	TCGA-A6-2686-11A-01R-A32Z-07	TCGA-A6-5667-11A-01R-1723-07	TCGA-AA-3712-11A-01R-1723-07	TCGA-A6-2685-11A-01R-A32Z-07	TCGA-AA-3660-11A-01R-1723-07	TCGA-AZ-6599-11A-01R-1774-07	TCGA-A6-5662-01A-01R-1653-07	TCGA-AZ-6598-01A-11R-1774-07	TCGA-AA-3663-01A-01R-1723-07	TCGA-AZ-6605-01A-11R-1839-07	TCGA-A6-2682-01A-01R-1410-07	TCGA-AA-3713-01A-21R-1723-07	TCGA-AA-3511-01A-21R-1839-07	TCGA-AZ-6600-01A-11R-1774-07	TCGA-AA-3662-01A-01R-1723-07	TCGA-AA-3496-01A-21R-1839-07	TCGA-AZ-6601-01A-11R-1774-07	TCGA-AA-3697-01A-01R-1723-07	TCGA-A6-5665-01A-01R-1653-07	TCGA-AA-3655-01A-02R-1723-07	TCGA-A6-5659-01A-01R-1653-07	TCGA-A6-2675-01A-02R-1723-07	TCGA-A6-2684-01A-01R-1410-07	TCGA-F4-6704-01A-11R-1839-07	TCGA-AZ-6603-01A-11R-1839-07	TCGA-AA-3489-01A-21R-1839-07	TCGA-A6-2686-01A-01R-A32Z-07	TCGA-A6-5667-01A-21R-1723-07	TCGA-AA-3712-01A-21R-1723-07
UGT1A1|54658	163.82	131.17	278.19	196.46	262.17	553.11	374.12	66.81	329.36	73.36	499.86	67.97	2572.72	126.64	171.5	214.46	228.65	119.68	17.97	53.86	753.87	285.73	318.91	172.9	183.85	23.18	0	299.97	305.47	111.97	28.57	51.57	45.2	18.82	114.01	0	71.23	21.73	53.44	2.52	4.06	2.86	7.83	0	13.25	0	98.24	2.67	0
UGT1A10|54575	5073.07	5100.13	5502.09	1057.69	10865.5	6677.74	3314.84	7177.36	2674.76	2654.53	4341.96	3311.57	11689.6	3366.5	5768.05	2801.02	10360.3	4017.84	721.77	1538.85	18353.9	5285.01	5208.14	7382.8	2588.7	6438.7	20.34	1238.13	345.05	1119.76	292.68	1613.03	372.14	427.38	118.05	155.02	152.78	208.32	180.03	215.15	173.47	570.74	102.85	509.49	471.19	216.26	88.99	115.88	259.43
UGT1A3|54659	0	0	0	3.01	0	13.25	0	0	34.65	0	3.05	0	95.85	0	3.33	2.88	15.24	0	2.98	0	50.48	8.58	3.11	0	2.91	5.87	11.77	15.18	0	1.59	2.73	2.74	0	2.72	61.39	0	0	2.75	2.85	2.54	1.68	5.78	18.38	36.14	2.68	0	1.57	0	2.67
UGT1A4|54657	0	0	2.99	2.93	0	10.33	0	2.99	2.81	0	5.92	0	20.97	0	6.46	0	5.92	0	0	0	5.77	8.36	5.42	0	0	0	0	0	0	0	0	0	0	0	0	0	2.6	0	0	0	0	0	0	0	0	0	5.1	0	0
UGT1A5|54579	0	9.75	3.08	0	11.96	13.25	2.82	6.15	8.66	0	18.32	0	92.76	0	9.99	1.58	15.24	0	0	0	41.57	0	3.11	3.13	0	0	0	0	0	2.97	0	0	2.68	0	2.56	0	0	0	0	0	0	0	0	0	0	0	0	0	0
UGT1A6|54578	419.92	719.94	225.6	159.92	207.23	846.98	193.76	618.43	46.1	87.61	24.34	35.64	509.45	409.84	402.54	11.46	93.05	332.14	203.9	151.38	285.07	23.08	72.53	16.59	265.51	202.22	85.54	1768.93	240.09	371.38	944.14	68.43	341.38	228.86	282.78	106.66	133.31	201.45	324.87	164.21	964.77	15.68	633.41	273.05	377.26	203.07	251.66	40.51	179.78
UGT1A7|54577	67.37	6.59	3.12	0	0	2.68	0	3.11	2.92	0	0	40.51	219.38	0	0	0	120.42	5.97	0	0	0	72.32	73.03	12.67	0	11.88	0	0	0	0	0	5.55	0	0	0	0	0	0	0	0	0	0	0	2.81	0	1.48	0	0	0
UGT1A8|54576	1623.97	1481.54	2151.62	321.45	3543.81	2159.65	899.27	2582.6	668.84	574.76	1345.46	1254.4	3543.93	920.99	1794.11	654.18	3690.16	1506.68	119.51	329.76	6978.05	1474.74	1379.93	2071.67	535.65	2592.61	2.81	43.47	30.39	326.4	20.26	589.99	93.12	99.21	34.5	14.32	45.07	60.54	12.18	38.58	29.37	135.12	12.61	5.34	66.76	30.91	11.44	4.69	42.12
UGT1A9|54600	229.86	242.89	176.32	85.54	247.33	298	153.18	187.56	83.9	109.74	153.07	193.92	754.36	147.03	225.02	139.41	411.99	172.68	6.86	57.14	659.32	238.18	241.81	257.24	75.38	198.54	27.54	124.33	0	112.93	13.62	59.69	8.49	0	13.71	0	0	12.21	26.62	0	1.65	66.83	12.92	87.16	7.86	11.29	0	8.26	0
UGT2A1|10941	1	0	0	0	0	0	1	0	0	0	0	0	9	0	0	1	0	0	0	1	1	0	0	1	2	0	0	0	0	0	0	0	0	0	0	18	0	0	0	0	0	0	0	13	0	0	11	0	0
UGT2A3|79799	3759	5168	2087	478	8005	9203	5317	4483	5410	2239	3136	2588	3697	9006	2842	2278	6269	3756	359	2998	7574	6095	6502	4325	6185	5178	10	1	14	578	765	1706	708	370	245	65	7	605	158	42	492	704	10	43	135	38	58	322	418
UGT2B10|7365	26	6	13	3	21	27	22	12	23	2	12	6	12	60	18	11	27	61	0	9	46	24	44	28	23	6	0	0	2	3	48	24	7	0	1	6	1	7	2	8	42	5	1	4022	11	1	1	3	5
UGT2B11|10720	2	4	0	2	2.46	0	1	0	4	1	0	0	3	7	0	1	1	1	2	2.54	1.29	0	2.22	1.5	12.87	4	0	0	0	0	1	1	0	0	1	0	0	0	0	1	0	3	1	222.9	0	0	1	0	1
UGT2B15|7366	8117	23	11630	1596	39	163	6160	18	4049	6575	7880	4387	5205	9	5732	5365	6057	3655	1784	8273	12710	24	3718	2315	2821	20433	15	23	154	2330	526	164	647	31	307	612	27	219	332	11	587	1524	133	7598	291	524	59	6	917
UGT2B28|54490	0	0	0	0	0	1	0	0	0	0	0	0	1	0	0	0	1	0	0	0	0	1	0	0	0	0	0	0	0	0	0	1	0	0	0	0	0	1	0	0	0	0	0	89	0	0	0	0	0
UGT2B4|7363	3	0	1	0	0	0	1	0	0	0	0	0	0	0	0	0	0	1	3	0	0	0	0	1	0	0	0	0	11	0	9	6	1	0	0	8	1	0	0	1	0	0	0	2698	0	5	1	0	1
UGT2B7|7364	247	220	32	17	343	142	515	77	475	70	168	138	138	1154	76	111	128	477	101	215	245	332	390	573	319	97	5	3	150	38	97	323	262	28	153	76	9	54	8	751	193	78	3	8249	30	7	28	57	89
UGT3A1|133688	0	0	1	0	0	0	0	0	0	0	0	0	0	0	0	1	0	0	0	0	0	0	0	0	0	0	0	0	0	0	0	0	0	0	0	0	0	0	0	0	1	0	0	0	0	0	1	0	0
UGT3A2|167127	3	8	20	5	3	20	8	11	3	5	2	4	1	0	6	6	6	3	3	4	16	7	15	21	0	12	0	0	0	1	1	3	1	3	1	2	4	1	1	5	0	1	0	7	4	1	4	1	4
UGT8|7368	1234	1549	1235	221	2409	1479	2017	2013	1608	743	1873	1729	1799	1799	1201	1227	1989	2262	1040	1193	3055	2262	1696	2624	1386	2433	1637	982	3803	831	1334	3068	981	2139	946	1540	2292	899	2837	3746	2496	831	964	1075	1695	2223	2028	1262	2658
[truncated: 3 more columns]

## Sheet: HNSC
Gene	TCGA-CV-7261-11A-01R-2016-07	TCGA-CV-7424-11A-01R-2081-07	TCGA-CV-6934-11A-01R-1915-07	TCGA-CV-7255-11A-01R-2016-07	TCGA-CV-6959-11A-01R-1915-07	TCGA-CV-6955-11A-01R-2016-07	TCGA-CV-7242-11A-01R-2016-07	TCGA-CV-7440-11A-01R-2187-07	TCGA-HD-A6I0-11A-11R-A31N-07	TCGA-H7-A6C4-11A-21R-A466-07	TCGA-CV-7177-11A-01R-2016-07	TCGA-CV-6936-11A-01R-1915-07	TCGA-CV-7434-11A-01R-2132-07	TCGA-CV-6960-11A-01R-2016-07	TCGA-CV-6933-11A-01R-1915-07	TCGA-CV-7437-11A-01R-2132-07	TCGA-CV-7432-11A-01R-2132-07	TCGA-CV-7416-11A-01R-2081-07	TCGA-CV-7406-11A-01R-2081-07	TCGA-CV-7183-11A-01R-2016-07	TCGA-WA-A7GZ-11A-11R-A34R-07	TCGA-CV-7423-11A-01R-2081-07	TCGA-CV-7103-11A-01R-2016-07	TCGA-CV-7438-11A-01R-2132-07	TCGA-CV-7252-11A-01R-2016-07	TCGA-HD-8635-11A-01R-2403-07	TCGA-CV-6935-11A-01R-1915-07	TCGA-CV-7245-11A-01R-2016-07	TCGA-CV-7425-11A-01R-2081-07	TCGA-CV-7101-11A-01R-2016-07	TCGA-CV-7235-11A-01R-2016-07	TCGA-CV-7250-11A-01R-2016-07	TCGA-CV-7097-11A-01R-2016-07	TCGA-CV-6938-11A-01R-1915-07	TCGA-CV-7238-11A-01R-2016-07	TCGA-CV-6961-11A-01R-1915-07	TCGA-HD-A6HZ-11A-11R-A31N-07	TCGA-CV-6939-11A-01R-1915-07	TCGA-CV-7091-11A-01R-2016-07	TCGA-CV-6956-11A-01R-2016-07	TCGA-CV-6943-11A-01R-1915-07	TCGA-CV-6962-11A-01R-1915-07	TCGA-CV-7178-11A-01R-2016-07	TCGA-CV-7261-01A-11R-2016-07	TCGA-CV-7424-01A-11R-2081-07	TCGA-CV-6934-01A-11R-1915-07	TCGA-CV-7255-01A-11R-2016-07	TCGA-CV-6959-01A-11R-1915-07	TCGA-CV-6955-01A-11R-2016-07
UGT1A1|54658	30.17	44.61	13.03	4.11	5.45	3.92	17.74	11.82	0	0	17.16	3.82	2.65	15.49	0	2.78	0	0	4.15	9.58	61.96	4.6	0	8.33	4.37	7.55	9.01	8.5	29.93	18.49	0	5.09	0	2.76	0	0	0	0	0	8.63	0	15.76	0	46.52	51.55	2.87	0	3.84	15.29
UGT1A10|54575	1007.81	2344.66	1935.06	426.41	49.76	251.86	1549.79	988.84	16.54	29.77	4395.7	514.69	5.21	1895.78	0	1940.82	0	20.57	55.27	2690.57	349.38	1394.6	74.22	277.47	97.44	253.79	3268.67	714.03	0	3783.42	0	1478.61	2.61	124.37	30.33	7.31	69.05	0	0	498.36	298.64	511.08	87.7	3560.77	0	152.72	57.76	24.58	3238.91
UGT1A3|54659	9.96	7.95	8.42	0	0	0	8.57	7.74	0	0	5.62	0	0	4.47	0	5.62	0	0	2.81	4.84	0	0	7.76	1.53	0	0	1.51	2.75	0	4.99	0	2.57	2.69	0	0	3	0	0	0	2.9	1.46	7.92	0	56	25.14	0	0	2.83	28.27
UGT1A4|54657	2.44	0	0	0	0	0	0	0	0	0	0	0	0	0	0	0	0	0	0	11.82	0	11.71	0	0	0	0	0	5.37	5.56	0	0	0	0	0	0	0	0	0	0	0	2.46	2.57	0	1.44	9.01	0	0	0	0
UGT1A5|54579	0	7.95	2.64	2.72	0	1.56	1.57	1.45	0	0	3.1	1.53	0	0	0	2.81	0	0	0	2.42	0	0	0	0	2.64	0	0	0	0	0	0	0	0	0	0	0	0	0	0	0	0	0	0	2.55	12.32	0	0	0	0
UGT1A6|54578	6484.96	2576.74	5146.3	2371.57	785.28	377.59	7825.47	5410.8	696.52	625.11	2239.56	3111.77	139.19	3061.88	72.53	5699.97	52.11	587.2	1790.38	5412.68	1872.44	2942.3	2359.27	2276.87	1657.48	834.52	4424.34	1571.12	78.43	4424.54	162.08	1702.7	57.97	980.71	679.32	351.98	1935.26	21.21	1.57	2312.23	2096.54	4831.75	616.45	13616.1	15793.1	2201.45	159.48	89.03	3346.97
UGT1A7|54577	12172.5	3442.72	316.4	1325.09	255.94	90.56	7613.14	6275.93	119.71	214.86	2496.32	3127.4	0	8418.32	0	7690.32	0	446.48	3881.99	9239.4	3425.48	3000.43	2844.95	2703.98	1520.37	1871.84	7564.43	2615.1	13.16	8355.95	2.31	2653.9	2.72	1349.53	598.59	228.93	38.15	5.79	1.43	3444.35	2963.36	6782.59	140.51	12206.5	15714.3	1940.1	13.24	6.98	7080.53
UGT1A8|54576	2476.35	1811.23	1484.84	461.26	12.94	211.06	1362.09	810.24	0	5.86	1375.53	134.45	2.57	85.94	1.47	1532.54	0	5.4	175.19	792.99	1156.82	117.77	59.69	133.6	32.95	75.57	389.07	155.52	0	2954.44	2.22	29.24	0	34.68	76.13	11.97	0	0	0	590.14	142.74	39.73	2.9	58.78	168.08	30.09	2.52	2.69	135.8
UGT1A9|54600	769.77	305.13	450.32	195.84	42.65	1.44	730.63	375.18	71.23	28.39	348.01	58.34	8.39	259.12	0	837.14	2.89	14.35	67.21	492.7	241.93	147.6	165.11	84.21	69.74	80.74	438.97	133.62	2.92	403.17	16.38	126.89	0	83.95	20.63	9.81	224.54	0	0	154.38	104.81	435.6	73.44	906.31	2801.55	120.77	0	8.06	392.22
UGT2A1|10941	5	677	376	10	2	1890	3	960	0	0	54	0	0	0	0	85	0	0	0	6	2	0	8	0	0	0	3	0	1	146	1	0	2	123	1	0	0	0	0	0	2	0	464	17	27	0	1	0	3
UGT2A3|79799	6	0	0	0	0	0	0	0	0	0	0	0	1	0	0	0	0	0	0	3	0	0	0	0	0	0	0	0	5	3	1	0	1	0	0	0	0	0	0	2	0	1	2	1	0	5	2	0	0
UGT2B10|7365	0	0	0	0	0	0	0	0	0	0	0	0	2	0	16	0	5	0	0	0	0	0	0	0	0	0	0	0	21	0	1	0	0	0	3	0	0	1	0	0	0	0	0	1	0	0	0	0	0
UGT2B11|10720	0	0	0	0	0	0	0	0	0	0	0	0	84	0	745.32	0	603.87	0	0	0	0	0	0	0	0	0	0	0	1	1	96	0	0	6	1	0	0	0	0	0	0	0	0	0	0	0	0	0	0
UGT2B15|7366	1	0	1	6	0	15	2	18	0	0	8	0	3	0	7	9	2	0	0	8	1	0	3	31	1	0	2	2	15	11	5	1	17	2	18	1	0	2	2	0	0	1	5	3	4	3	4	4	14
UGT2B28|54490	0	3	0	4	11	0	0	1	1	4	1	0	159	0	952	1	885	0	0	0	0	0	0	1	0	0	0	0	0	3	91	0	3	3	3	0	0	4	0	0	0	4	0	5	1	0	0	0	0
UGT2B4|7363	0	1	1	0	7	0	0	3	0	6	0	0	8	0	0	0	0	2	5	0	10	0	1	0	0	0	1	2	36	0	0	1	9	2	3	0	0	8	2	1	0	0	2	0	0	2	1	4	0
UGT2B7|7364	8	4	27	13	2	70	1	6	0	0	7	2	19	1	17	2	34	1	1	37	3	0	3	10	0	4	7	1	27	19	54	2	11	1	120	0	9	30	3	2	0	14	62	1	0	3	6	0	5
UGT3A1|133688	2	0	3	1	13	4	0	2	0	23	2	0	0	0	0	1	0	0	70	0	118	4	6	1	1	5	0	20	2	0	3	14	25	23	41	0	0	122	104	13	6	1	2	0	4	2	0	0	0
UGT3A2|167127	1	3	6	0	6	55	2	1	10	0	3	3	1	6	0	9	0	0	14	3	1	1	5	8	4	5	3	4	10	2	4	1	31	136	6	10	7	7	3	0	6	4	38	0	3	3	0	5	3
UGT8|7368	218	113	249	210	247	205	136	94	6	24	110	35	300	223	280	196	423	151	61	70	41	41	235	155	281	75	73	59	1	380	349	57	242	124	268	35	5	124	22	55	149	83	169	236	531	1412	582	5	48
[truncated: 37 more columns]

## Sheet: KICH
Gene	TCGA-KO-8415-11A-01R-2315-07	TCGA-KN-8430-11A-01R-2315-07	TCGA-KN-8436-11A-01R-2315-07	TCGA-KL-8326-11A-01R-2315-07	TCGA-KN-8434-11A-01R-2315-07	TCGA-KL-8336-11A-01R-2315-07	TCGA-KN-8419-11A-01R-2315-07	TCGA-KL-8329-11A-01R-2315-07	TCGA-KN-8427-11A-01R-2315-07	TCGA-KN-8435-11A-01R-2315-07	TCGA-KN-8432-11A-01R-2315-07	TCGA-KN-8426-11A-01R-2315-07	TCGA-KN-8429-11A-01R-2315-07	TCGA-KN-8433-11A-01R-2315-07	TCGA-KN-8437-11A-01R-2315-07	TCGA-KN-8428-11A-01R-2315-07	TCGA-KN-8431-11A-01R-2315-07	TCGA-KN-8422-11A-01R-2315-07	TCGA-KN-8423-11A-01R-2315-07	TCGA-KL-8332-11A-01R-2315-07	TCGA-KN-8424-11A-01R-2315-07	TCGA-KL-8324-11A-01R-2315-07	TCGA-KO-8403-11A-01R-2315-07	TCGA-KL-8339-11A-01R-2315-07	TCGA-KN-8425-11A-01R-2315-07	TCGA-KO-8415-01A-11R-2315-07	TCGA-KN-8430-01A-11R-2315-07	TCGA-KN-8436-01A-11R-2315-07	TCGA-KL-8326-01A-11R-2315-07	TCGA-KN-8434-01A-11R-2315-07	TCGA-KL-8336-01A-11R-2315-07	TCGA-KN-8419-01A-11R-2315-07	TCGA-KL-8329-01A-11R-2315-07	TCGA-KN-8427-01A-11R-2315-07	TCGA-KN-8435-01A-11R-2315-07	TCGA-KN-8432-01A-11R-2315-07	TCGA-KN-8426-01A-11R-2315-07	TCGA-KN-8429-01A-11R-2315-07	TCGA-KN-8433-01A-11R-2315-07	TCGA-KN-8437-01A-11R-2315-07	TCGA-KN-8428-01A-11R-2315-07	TCGA-KN-8431-01A-11R-2315-07	TCGA-KN-8422-01A-11R-2315-07	TCGA-KN-8423-01A-11R-2315-07	TCGA-KL-8332-01A-11R-2315-07	TCGA-KN-8424-01A-11R-2315-07	TCGA-KL-8324-01A-11R-2315-07	TCGA-KO-8403-01A-11R-2315-07	TCGA-KL-8339-01A-11R-2315-07
UGT1A1|54658	4.12	2.87	0	0	0	52.64	4.01	43.54	0	13.04	0	0	0	5.75	9.04	2.9	2.82	0	0	27.23	0	39.13	0	12.31	3.91	10.25	0	0	0	0	0	0	0	0	0	0	4.52	0	0	89.13	0	0	0	0	0	0	0	2.97	0
UGT1A10|54575	0	0	0	3.09	0	18.73	0	42.63	0	12.75	7.2	0	0	2.82	0	12.86	0	0	0	32.17	0	2.82	0	44.1	0	0	0	0	0	0	0	0	0	0	0	0	0	0	0	0	0	0	0	0	0	0	0	0	0
UGT1A3|54659	0	2.91	0	0	3.07	9.15	0	11.63	0	11.52	2.44	10.62	0	2.91	2.91	0	0	2.82	2.68	11.01	0	2.82	0	8.25	0	0	0	0	0	0	0	0	0	0	0	0	0	0	0	2.58	0	0	0	0	5.45	0	0	0	0
UGT1A4|54657	0	16.99	0	3.1	2.98	2.97	0	38.42	0	0	0	0	0	0	0	0	0	0	0	2.68	0	0	0	2.67	0	0	0	0	0	0	0	0	0	0	0	0	0	0	0	0	0	0	0	0	0	0	0	0	0
UGT1A5|54579	0	0	0	0	3.07	0	0	0	0	0	0	2.65	2.64	0	0	0	0	0	8.03	0	0	0	0	0	0	0	0	0	0	0	0	0	2.88	0	0	0	0	0	0	0	0	0	0	0	0	0	0	0	0
UGT1A6|54578	1004.1	4312.33	793.58	3974.63	9122.13	7002.37	1645.32	26935.1	2195.19	9869.5	2074.57	3649.36	1583.32	5448.61	1147.51	5022.04	1552.66	1723.81	2109.85	16547.2	854.98	11101.9	1249.35	14507	1625.37	1126.33	17	383	184.27	355.34	88	510.97	138.4	138.67	209.28	124	1810.61	5	129.27	19481.1	13	0	29.03	6	1983.59	22	48.94	2008.51	7
UGT1A7|54577	0	0	3.04	9.71	15.56	6.17	5.35	29.42	5.94	0	0	0	0	5.89	2.94	8.9	0	2.85	0	22.28	0	14.24	0	25.04	0	0	0	0	0	0	0	0	0	0	0	0	0	0	0	0	0	0	0	0	0	0	0	0	0
UGT1A8|54576	10.3	0	0	12.11	116.97	29.07	7.59	371.17	2.81	345.97	2.34	7.63	0	33.26	5.57	67.14	21.79	2.69	2.57	436.41	2.9	102.23	0	165.25	0	0	0	0	0	0	0	0	0	0	0	0	0	0	0	0	0	0	0	0	0	0	0	0	0
UGT1A9|54600	801.47	258.9	495.38	6371.36	17975.2	2262.9	1348.73	52132.1	315.06	42434.2	482.46	688.74	87.04	6997.76	397.02	7930.17	2577.73	1801.83	616.87	50982	693.12	14883.9	47.65	35152.4	112.72	46.42	0	0	4.73	5.66	0	15.03	33.72	3.33	14.72	0	155.86	0	2.73	431.16	0	0	4.97	0	74.97	0	10.06	64.52	0
UGT2A1|10941	7	3	2	1777	112	9	266	590	210	779	0	7	10	793	44	798	24	2	25	510	54	1683	51	350	92	5	22	2	1	2	9	3	15	0	1	2	2	517	1	0	94	24	0	51	3	23	5	4	64
UGT2A3|79799	657	627	1001	1325	3515	4593	2773	9434	2861	8102	2461	1927	1052	3249	1123	3820	927	1214	1383	15636	2179	4551	827	10792	800	0	0	3	0	2	1	1	3	21	0	0	2	0	0	13	2	0	0	0	1	3	1	2	11
UGT2B10|7365	26	4	14	44	193	15	19	160	8	266	13	18	17	28	11	57	35	29	11	675	6	114	12	347	21	2	0	6	0	1	0	0	0	14	0	0	0	0	1	6	0	0	0	2	1	0	0	2	1
UGT2B11|10720	10	11.27	3.11	10	0	1.06	8.8	21	12.22	56.89	10.31	19.25	2.12	4.07	13.31	6.26	3.17	3.13	11.36	58.77	7.18	6	6.46	1.05	2.07	1	2	1	0	0	0	0	0	0	1	0	1	2	0	0	5	0	0	86.62	0	2	2	0	11
UGT2B15|7366	2	0	1	2	2	6	0	4	0	0	0	1	2	0	4	4	0	1	0	2	1	1	0	0	1	0	2	43	0	0	0	9	1	0	1	0	0	0	0	19	1	0	8	2	3	0	0	1	0
UGT2B28|54490	1	0	0	0	0	0	3	1	0	1	0	0	0	0	3	9	0	1	1	0	1	10	4	1	2	0	31	5	12	3	3	2	15	0	2	2	3	29	3	0	98	38	0	302	6	3	31	1	145
UGT2B4|7363	1	0	0	68	2	2	0	9	10	16	1	1	1	1	1	21	1	3	2	0	0	10	1	13	2	1	124	14	15	0	4	1	23	0	0	2	7	5	4	0	34	18	3	787	0	1	7	0	32
UGT2B7|7364	2979	511	1955	16225	47155	2585	3516	57477	1732	52275	3204	1746	1091	13428	1138	14957	7701	5946	1681	177870	2104	30577	981	109720	654	241	8	601	11	181	1	1	106	1868	1	73	18	22	16	788	4	0	2	4	101	6	15	188	5
UGT3A1|133688	1413	5668	3878	3356	6067	4702	4335	12160	3897	10870	3199	4150	4772	3815	1043	4219	3756	3250	1111	7908	3653	5522	4194	6924	3744	1	0	1	1	0	5	0	23	17	1	0	2	0	3	64	2	0	0	0	2	23	3	2	1
UGT3A2|167127	42	118	57	77	338	311	62	749	49	607	36	61	60	92	67	138	77	70	32	173	50	157	102	306	35	15	0	1	0	3	17	0	4	0	2	1	0	2	0	19	3	0	0	1	1	217	0	3	0
UGT8|7368	3740	5822	5764	1290	3891	1169	4706	2105	7249	3644	4215	8682	4819	4705	3309	2644	6911	5842	4720	2006	4018	3303	7027	2489	10979	2031	7420	4492	2743	5719	9906	6807	10973	42	8467	5650	3637	7414	1897	2535	2695	3299	7413	21548	3014	8660	3002	3499	8051
[truncated: 1 more columns]

## Sheet: KIRC
Gene	TCGA-B0-5690-11A-01R-1541-07	TCGA-CZ-5468-11A-01R-1503-07	TCGA-CW-5589-11A-01R-1541-07	TCGA-CZ-5987-11A-01R-1672-07	TCGA-B0-5697-11A-01R-1541-07	TCGA-CZ-5462-11A-01R-1503-07	TCGA-CW-6087-11A-01R-1672-07	TCGA-CZ-5465-11A-01R-1503-07	TCGA-B8-4622-11A-01R-1758-07	TCGA-CZ-5461-11A-01R-1503-07	TCGA-B0-5703-11A-01R-1541-07	TCGA-CJ-5679-11A-01R-1541-07	TCGA-CJ-5681-11A-01R-1541-07	TCGA-CW-5587-11A-01R-1541-07	TCGA-B0-5696-11A-01R-1541-07	TCGA-CZ-5470-11A-01R-1503-07	TCGA-CW-5584-11A-01R-1541-07	TCGA-B0-5711-11A-01R-1672-07	TCGA-CW-5580-11A-02R-1672-07	TCGA-CJ-6033-11A-01R-1858-07	TCGA-CZ-5457-11A-01R-1503-07	TCGA-CW-5591-11A-01R-1541-07	TCGA-CW-6088-11A-01R-1672-07	TCGA-CZ-5458-11A-01R-1503-07	TCGA-CZ-5463-11A-01R-1503-07	TCGA-B0-5701-11A-01R-1541-07	TCGA-B8-5549-11A-01R-1541-07	TCGA-CZ-5989-11A-01R-1672-07	TCGA-CJ-5676-11A-01R-1541-07	TCGA-A3-3387-11A-01R-1541-07	TCGA-CW-5581-11A-01R-1541-07	TCGA-CZ-5985-11A-01R-1672-07	TCGA-CJ-5680-11A-01R-1541-07	TCGA-B8-5552-11A-01R-1672-07	TCGA-CZ-5456-11A-02R-1503-07	TCGA-CZ-5466-11A-01R-1503-07	TCGA-CJ-5677-11A-01R-1541-07	TCGA-CZ-5451-11A-01R-1503-07	TCGA-CZ-5982-11A-01R-1672-07	TCGA-CZ-5454-11A-01R-1503-07	TCGA-B0-5691-11A-01R-1541-07	TCGA-B0-5402-11A-01R-1503-07	TCGA-CJ-5672-11A-01R-1541-07	TCGA-CZ-5469-11A-01R-1503-07	TCGA-B0-5705-11A-01R-1541-07	TCGA-CZ-4863-11A-01R-1503-07	TCGA-B0-5709-11A-01R-1541-07	TCGA-CZ-4864-11A-01R-1503-07	TCGA-B0-4712-11A-02R-1503-07
UGT1A1|54658	5.64	2.81	21.93	2.68	0	0	14.27	7.72	16.89	5.37	11.54	16.83	40.09	40.2	2.87	0	11.62	0	0	3.13	4.79	106.07	0	0	0	5.52	0	2.59	17.54	20.58	4.33	47.66	16.84	291.15	0	22.24	35.59	36.2	5.48	0	27.71	20.08	2.75	0	10.71	0	22.19	42.52	2.77
UGT1A10|54575	5.54	0	8.54	2.63	0	2.57	12.21	0	24.89	7.88	11.34	5.52	0	8.76	13.2	0	34.99	3.97	0	3.07	0	1806.01	0	0	0	0	0	0	5.89	5.37	8.43	18.96	0	0	0	11.23	13	28.43	10.67	0	13.49	49.71	0	0	0	0	8.18	126.55	0
UGT1A3|54659	2.86	5.68	8.72	2.72	0	2.64	0	2.51	0	5.44	0	39.79	0	0	2.88	7.82	20.6	0	2.79	0	3.1	135.96	0	0	2.66	0	0	2.62	5.92	0	5.73	0	45.48	19.95	2.9	5.8	2.91	8.28	5.56	0	14.3	2.85	0	0	0	0	14.06	10.77	2.8
UGT1A4|54657	0	5.52	0	0	0	0	0	0	2.77	0	2.84	5.52	0	0	0	0	2.86	2.64	0	0	0	0	0	0	0	2.66	0	0	5.75	2.69	0	0	2.77	1.52	2.83	0	5.64	2.68	0	0	0	5.53	0	0	0	0	2.73	2.62	0
UGT1A5|54579	0	2.84	2.91	0	0	0	3.16	0	0	0	0	0	0	0	0	0	0	1.36	0	0	0	8.5	0	1.57	0	0	0	0	0	0	2.86	0	0	0	0	0	0	2.76	0	0	0	2.85	0	0	2.71	0	2.81	0	0
UGT1A6|54578	7625.53	4826.41	6093.54	5409.23	4697.87	1818.42	5138.52	4810.74	13446	8393.63	2914.17	8836.94	5596.74	13485.4	6090.68	1717.25	16678.6	4768.94	2909.02	7717.77	8284.8	2738.61	302.14	780.08	4168.38	3512.48	141.92	6267.12	12957.2	5903.87	6247.76	4688.72	13808.7	9679.09	1941.43	22408.7	12751.1	16070.5	9769.58	2318.04	13010.2	14658.7	2313.88	827.45	6212.27	2734.06	17470.6	24113.7	5787.23
UGT1A7|54577	8.67	0	11.76	2.75	0	0	0	0	23.13	0	0	2.88	11.73	2.98	2.92	0	2.98	2.74	0	0	0	54.49	0	0	0	2.77	0	0	0	28.02	5.8	8.49	0	0	0	23.47	11.77	16.77	2.82	0	8.69	5.78	0	0	2.74	2.59	321.66	54.52	0
UGT1A8|54576	100.53	2.71	271.07	31.03	35.58	7.58	128.61	0	208.76	75.26	13.92	37.91	35.74	358.91	164.71	0	120.59	38.86	2.66	23.96	2.67	1599.38	0	0	7.63	23.49	0	0	259.53	366.98	158.18	132.77	48.83	33.03	0	460.92	152.13	339.49	200.87	0	204.62	425.77	23.94	0	54.31	2.45	152.52	789.9	1.51
UGT1A9|54600	15488.2	338.04	27308.5	5731.97	6717.55	903.79	19649.2	134.03	42829.6	13212.4	1604.2	9827.6	12848.7	43583.8	19988.7	122.93	15006.7	6144.49	1329.53	3582.08	210.63	2070.99	5.86	58.34	2984.33	4590.08	34.08	471.67	37233.1	50876.5	27446.9	19685.4	12047.4	80.27	49.84	70849.6	21152.8	58021.9	32525	100.96	28043	63825.7	2873.42	8.55	8008.25	105.9	27730.3	104379	137.69
UGT2A1|10941	9	0	3497	219	73	175	101	3	759	1497	3	33	265	10	509	269	0	1422	20	351	1	0	0	3	132	349	45	100	1092	1623	999	694	3	1	0	751	1788	75	691	269	619	4	165	3	160	6	2224	921	2
UGT2A3|79799	4989	1476	9293	2610	1541	2628	6227	3609	7127	6517	2875	5894	2211	8198	5952	2834	6036	4235	1568	1956	316	14247	1371	1303	1381	3078	1270	1117	10308	12721	5463	3515	8366	1221	330	26956	6306	8889	5308	2427	8234	7721	1468	780	2657	2350	8254	17524	830
UGT2B10|7365	61	2	122	30	45	11	30	6	115	57	17	28	170	74	100	11	19	40	14	28	7	23	11	16	14	26	7	12	142	104	93	55	24	6	4	294	71	170	103	8	78	86	14	4	24	53	134	233	7
UGT2B11|10720	30.32	10.25	11.96	3	6.44	10.86	35.78	15.64	25	4.21	2	15	10	26.67	1.08	9.34	6	1.03	8	19.73	3	15.53	8	1.04	6	5	3.28	6.15	27.41	47	21	6.3	6.1	1	3	114.33	21.87	26.01	2	5.14	21.22	17	4.16	3.19	21.48	7.55	17.85	51.67	2
UGT2B15|7366	1	0	3	0	3	3	0	5	1	3	2	5	33	2	1	3	0	4	0	0	0	0	0	0	0	0	3	0	5	1	1	2	0	7	0	10	4	6	0	9	9	24	0	1	0	4	1	1	1
UGT2B28|54490	0	0	15	2	8	0	0	1	15	8	1	4	2	0	1	1	1	0	2	0	0	3	1	2	0	0	1	0	15	18	4	0	0	0	0	0	1	28	0	6	3	13	1	0	5	1	21	1	0
UGT2B4|7363	0	0	9	0	7	0	0	2	64	48	4	3	1	3	0	0	5	2	0	2	1	0	4	0	1	6	0	0	15	25	5	6	2	1	0	23	14	0	7	7	7	7	1	1	0	3	41	5	0
UGT2B7|7364	29676	1265	45459	11776	20124	3866	17289	912	64539	17938	7021	16110	26948	35158	42277	1846	12214	22279	3763	5854	1813	12098	1106	1444	5009	11785	1037	951	66742	68842	52142	40621	8522	1855	979	127357	40755	89651	73866	1598	41641	55860	6786	1026	13877	2221	71978	140007	1404
UGT3A1|133688	5546	8532	7851	2308	3405	7762	4568	6911	9138	8090	4231	4910	3506	8165	6085	4857	5695	3952	4097	2671	4992	73	5155	8676	5770	4014	4480	3640	6552	8458	4794	3624	5357	1438	2106	13514	7754	14064	6281	6844	8426	9837	5042	5593	4629	2015	10689	10436	12337
UGT3A2|167127	267	147	180	77	89	153	159	82	193	216	55	163	149	149	192	72	327	79	42	49	50	12	74	70	151	100	32	34	357	312	167	73	141	7	37	441	214	382	280	56	211	715	50	53	132	37	329	592	123
UGT8|7368	5869	4856	3066	1893	2350	13669	7060	12051	1050	11935	3014	3167	1757	3530	2600	8298	1576	8101	7731	4461	6032	585	12264	9474	13855	4967	9283	5749	2326	1248	2713	2476	1771	3067	4484	3395	2441	3357	2573	13970	3202	1868	9315	9765	7870	4800	2494	1897	11329
[truncated: 95 more columns]

## Sheet: KIRP
Gene	TCGA-BQ-7051-11A-02R-1965-07	TCGA-DZ-6133-11A-01R-1965-07	TCGA-BQ-7055-11A-01R-1965-07	TCGA-A4-A4ZT-11A-11R-A26U-07	TCGA-A4-A57E-11A-11R-A26U-07	TCGA-Y8-A8RY-11A-11R-A37K-07	TCGA-BQ-7044-11A-01R-1965-07	TCGA-BQ-5878-11A-01R-1592-07	TCGA-BQ-5890-11A-01R-1592-07	TCGA-BQ-5882-11A-01R-1592-07	TCGA-DZ-6132-11A-01R-1965-07	TCGA-BQ-7061-11A-01R-1965-07	TCGA-GL-6846-11A-01R-1965-07	TCGA-BQ-7059-11A-01R-1965-07	TCGA-B9-4115-11A-01R-1758-07	TCGA-BQ-5877-11A-01R-1592-07	TCGA-BQ-7045-11A-01R-1965-07	TCGA-BQ-5887-11A-01R-1965-07	TCGA-BQ-5875-11A-01R-1592-07	TCGA-DZ-6131-11A-01R-1965-07	TCGA-BQ-5891-11A-01R-1592-07	TCGA-DZ-6134-11A-01R-1965-07	TCGA-BQ-5894-11A-01R-1592-07	TCGA-BQ-5884-11A-01R-1592-07	TCGA-P4-A5E8-11A-12R-A28H-07	TCGA-BQ-5888-11A-01R-1592-07	TCGA-BQ-5879-11A-01R-1592-07	TCGA-GL-A59R-11A-11R-A26U-07	TCGA-P4-A5ED-11A-11R-A28H-07	TCGA-GL-7966-11A-01R-2204-07	TCGA-BQ-7046-11A-01R-1965-07	TCGA-GL-A9DE-11A-11R-A37K-07	TCGA-BQ-7051-01A-12R-1965-07	TCGA-DZ-6133-01A-11R-1965-07	TCGA-BQ-7055-01A-11R-1965-07	TCGA-A4-A4ZT-01A-11R-A26U-07	TCGA-A4-A57E-01A-11R-A26U-07	TCGA-Y8-A8RY-01A-11R-A37K-07	TCGA-BQ-7044-01A-11R-1965-07	TCGA-BQ-5878-01A-11R-1592-07	TCGA-BQ-5890-01A-11R-1592-07	TCGA-BQ-5882-01A-11R-1592-07	TCGA-DZ-6132-01A-11R-1965-07	TCGA-BQ-7061-01A-11R-1965-07	TCGA-GL-6846-01A-11R-1965-07	TCGA-BQ-7059-01A-11R-1965-07	TCGA-B9-4115-01A-01R-1193-07	TCGA-BQ-5877-01A-11R-1592-07	TCGA-BQ-7045-01A-31R-1965-07
UGT1A1|54658	22.32	18.06	23.58	5	0	5.47	0	42.57	43.59	14.7	31.49	5	8.87	65.9	8.48	14.01	8.24	5.63	0	0	12.68	16.95	21.82	25.52	0	2.98	86.89	0	0	16.65	27.08	0	20.4	20.12	0	0	92.66	0	25.5	12.51	0	51.73	0	52.28	0	5.65	0	8.37	0
UGT1A10|54575	4.18	30.92	13.19	0	0	0	29.29	74.16	34.06	49.69	16.85	0	43.56	75.57	8.31	10.99	23.92	0	0	0	10.95	38.82	8.54	12.5	0	0	26.67	4.7	0	8.1	57.49	4.16	3.94	0	0	0	61.22	0	0	0	0	0	0	0	0	4.21	0	32.69	0
UGT1A3|54659	19.78	2.94	8.96	2.95	0	0	0	2.79	2.83	11.16	12.81	4.93	6	14.42	0	2.84	2.71	2.85	5.87	0	5.64	25.74	5.73	0	0	2.98	5.49	0	0	0	14.52	0	2.61	0	0	0	55.06	0	12.9	5.99	0	21.41	0	28.57	0	22.88	0	16.63	0
UGT1A4|54657	2.75	11.43	2.9	2.86	0	0	6.52	5.43	2.75	2.72	2.82	0	2.91	2.8	2.67	5.52	2.65	0	0	0	0	2.78	5.57	0	0	0	2.68	0	0	0	2.82	0	0	2.59	0	0	8.45	0	2.8	2.47	1.71	2.61	0	2.78	0	0	0	0	2.57
UGT1A5|54579	2.83	2.94	5.97	0	0	0	0	5.58	0	0	2.9	0	0	0	0	0	0	0	0	0	0	0	0	2.82	0	0	0	0	0	0	0	0	0	0	0	0	2.9	0	0	2.53	0	5.35	0	2.86	0	0	0	0	0
UGT1A6|54578	12182.4	7364.56	3762.88	1115.85	1132.09	1136.2	11590.1	16723.7	13646.2	13486.9	9941.43	3277.49	12420.7	11589.1	11852.9	13645	6623.6	2505.61	5968.26	1624.46	10422.5	15081	19173.3	12408.9	1024.77	6486.39	8334.93	362.94	1514.11	3745.25	9043	1028.72	3917.47	24824.4	248.34	1493.51	53504.8	163.3	59216.1	36026.8	2647.56	25798.2	330.64	32381.7	222.42	8531.82	793.59	4582.95	470.15
UGT1A7|54577	0	300.62	6.04	0	0	0	3.41	39.53	5.73	16.93	5.82	0	303.77	20.43	2.78	28.72	321.17	0	5.94	0	328.01	11.58	29.01	0	0	0	694.8	0	0	8.43	20.58	0	7.91	0	0	0	5.87	0	0	0	0	16.23	0	8.67	0	0	14.08	8.42	0
UGT1A8|54576	45.85	168.2	17.05	0	0	0	54.32	458.16	148.64	450.42	94.05	2.37	94.03	110.04	52.54	335.79	223.24	46.28	19.56	10.84	272.22	215.58	409.67	196.63	0	2.88	288.82	0	2.84	2.65	265.98	2.75	22.49	2.54	0	0	234.73	0	82.46	2.42	0	128.02	0	209.94	0	5.46	0	21.2	2.53
UGT1A9|54600	14624.9	34136.3	6303.43	88.34	507.91	70.33	14768.4	79748.1	29375.2	76350.5	13549.8	113.2	25646.2	39982.8	17999.3	57080.1	35757.5	6498.63	4739.37	615.7	38576	29974.5	79827.3	37777.7	559.23	1428.77	79976.7	27.36	348.04	907.92	37430.5	221.38	5318.19	807.36	7.66	53.49	21098.3	23.7	14734.3	811.29	1258.73	27215.4	15.36	49299.2	147.58	719.98	26.32	4021.75	21.75
UGT2A1|10941	31	406	182	32	534	0	467	892	281	1001	537	9	22	597	263	1764	97	23	934	18	821	85	626	320	1	29	33	45	130	160	1130	28	0	56	0	68	25	3	1314	2	0	0	180	0	0	2	2	0	2
UGT2A3|79799	2729	5218	2586	341	878	453	3734	11578	7463	7389	4673	1308	5580	9860	5192	15839	6325	1674	3139	2751	7303	8509	12009	7579	250	1277	11256	575	538	3407	8250	618	18265	26477	5	4608	7288	9375	2956	23553	6424	2763	7049	13783	22641	22452	7371	11164	733
UGT2B10|7365	85	134	48	3	9	6	114	200	262	493	49	50	87	222	59	322	188	56	26	11	323	160	298	244	3	12	249	5	17	14	362	21	104	34	0	10	26	105	61	117	37	66	30	185	41	78	90	87	30
UGT2B11|10720	15	9.26	20.82	4.15	4	7.66	20.25	36.67	6	51	1.03	11.23	26.71	41.7	27.52	62	29	25.84	7	9.34	26.45	42.52	98	40.73	1	13.72	5.2	9	0	7	28	17	13.4	5.25	0	5	53.5	15.22	1	35.02	7	0	3	19	580.97	50.25	22.29	9.63	1
UGT2B15|7366	5	2	0	0	0	0	1	0	3	0	4	0	0	1	3	2	1	3	5	6	4	4	1	0	5	4	0	0	0	2	3	2	0	1	0	0	0	1	0	2	2	0	7	0	1	7	0	1	0
UGT2B28|54490	0	1	0	0	0	0	4	0	2	0	6	0	0	3	12	0	0	3	0	0	44	9	74	19	0	3	1	0	0	0	32	1	0	2	0	0	0	3	9	0	0	0	0	1	5	1	8	0	0
UGT2B4|7363	6	2	0	0	3	0	21	0	5	1	6	1	2	15	0	24	1	0	1	1	16	0	2	0	2	0	17	0	3	20	28	0	0	1	0	0	0	2	23	0	1	2	0	0	0	0	0	0	0
UGT2B7|7364	30522	48127	18888	585	2207	897	35370	121689	78536	136088	15069	2481	26417	75577	32770	169655	49467	15404	10751	5480	73262	49479	155804	68278	1616	3190	135323	310	1964	3432	108453	909	5589	6979	42	738	12860	6383	6899	24080	6098	1887	2252	43838	13152	26130	17515	7117	1613
UGT3A1|133688	7856	8887	2391	2115	2187	4792	4253	16218	7922	14879	5017	6173	10036	8484	5595	12097	7930	5370	4341	2247	7740	12302	17731	11912	1370	2406	17111	2352	3866	2328	6985	3639	444	669	2	3	23221	23	698	15447	7	7957	126	16526	48	1230	11	10647	51
UGT3A2|167127	217	204	51	36	25	44	204	546	216	727	117	42	272	243	210	488	223	127	85	26	292	210	1030	435	25	85	724	16	46	56	268	32	2	11	2	0	797	0	340	637	10	3466	63	113	29	3	0	292	1
UGT8|7368	2962	2522	3941	3846	1805	7256	1858	2225	1189	2010	1757	7779	3516	2597	5802	1498	1717	5348	4676	5665	4117	1515	2017	1499	882	3524	2427	1640	3303	1703	2954	4707	2915	1898	3905	1017	277	342	711	1190	63	444	302	420	415	1336	181	1463	177
[truncated: 15 more columns]

## Sheet: LIHC
Gene	TCGA-FV-A3R2-11A-11R-A22L-07	TCGA-EP-A26S-11A-12R-A16W-07	TCGA-BD-A2L6-11A-21R-A213-07	TCGA-DD-A3A4-11A-11R-A22L-07	TCGA-BC-A216-11A-11R-A155-07	TCGA-DD-A114-11A-12R-A131-07	TCGA-DD-A116-11A-12R-A26B-07	TCGA-DD-A1EB-11A-11R-A131-07	TCGA-DD-A1EI-11A-11R-A131-07	TCGA-DD-A1EE-11A-11R-A131-07	TCGA-DD-A3A5-11A-11R-A22L-07	TCGA-BC-A10Q-11A-11R-A131-07	TCGA-FV-A3I0-11A-11R-A22L-07	TCGA-BC-A110-11A-11R-A131-07	TCGA-FV-A3I1-11A-11R-A22L-07	TCGA-BC-A10R-11A-11R-A131-07	TCGA-DD-A39W-11A-11R-A213-07	TCGA-FV-A2QR-11A-11R-A213-07	TCGA-DD-A1EC-11A-11R-A131-07	TCGA-DD-A11B-11A-11R-A131-07	TCGA-BC-A10X-11A-11R-A131-07	TCGA-G3-A3CH-11A-11R-A22L-07	TCGA-DD-A3A8-11A-11R-A22L-07	TCGA-BC-A10W-11A-11R-A131-07	TCGA-DD-A3A2-11A-11R-A213-07	TCGA-DD-A11D-11A-12R-A131-07	TCGA-DD-A113-11A-12R-A131-07	TCGA-DD-A11A-11A-11R-A131-07	TCGA-DD-A1EH-11A-11R-A131-07	TCGA-FV-A23B-11A-11R-A16W-07	TCGA-DD-A3A6-11A-11R-A22L-07	TCGA-DD-A3A3-11A-11R-A22L-07	TCGA-BD-A3EP-11A-12R-A22L-07	TCGA-DD-A118-11A-11R-A131-07	TCGA-BC-A10T-11A-11R-A131-07	TCGA-DD-A11C-11A-11R-A131-07	TCGA-DD-A39Z-11A-21R-A213-07	TCGA-BC-A10U-11A-11R-A131-07	TCGA-DD-A39V-11A-11R-A213-07	TCGA-BC-A10Z-11A-11R-A131-07	TCGA-DD-A39X-11A-11R-A213-07	TCGA-DD-A119-11A-11R-A131-07	TCGA-DD-A1EG-11A-11R-A213-07	TCGA-DD-A1EJ-11A-11R-A155-07	TCGA-DD-A3A1-11A-11R-A213-07	TCGA-EP-A3RK-11A-11R-A22L-07	TCGA-BC-A10Y-11A-11R-A131-07	TCGA-EP-A12J-11A-11R-A131-07	TCGA-DD-A1EL-11A-11R-A155-07
UGT1A1|54658	2990.18	9240.54	6626.49	12520.1	13039.7	75796.7	19106.5	32251.7	22454.4	28265.8	5719.9	12523.7	22229.2	10628.2	27516.5	20952.3	28952.5	14875.6	17770.8	12415.6	29392.3	21552	19633.8	17155.2	16920	38593.8	19035.7	21004.7	3051.24	23610	6777.44	12227	11028.4	8337.43	9293.74	12552.7	12382.6	25413.5	16945.6	9367.44	16233.7	23108.9	11900.3	22706.6	2839.43	6167.51	18508.5	15014.4	47965.5
UGT1A10|54575	4.87	0	0	0	0	6.04	4.17	0	0	0	4.85	0	0	0	0	0	0	40.02	0	4.31	0	9.21	16.73	0	3.09	0	9.19	0	0	8.42	0	0	4.17	0	3.17	0	0	3.19	4.44	9.89	2.88	2.76	0	4.39	0	4.34	0	2.73	8.54
UGT1A3|54659	3499.47	1047.51	2033.69	3654.3	1111.16	1493.02	2477.53	1146.64	1593.25	813.94	4714.92	1443.43	1178.48	1684.37	5171.6	2788.24	2100.37	2283.55	864.43	382.09	727.42	716.2	743.84	564.85	1782.75	907.58	3554.33	1038.35	2528.31	1002.19	868.84	2698.25	1213.05	1933.98	467.81	422.54	2006.25	1148.7	481.39	1147.07	4591	5590.48	1022.32	572.9	265.08	574.82	1289.62	1155.7	2527.51
UGT1A4|54657	9750.19	15210.1	8287.05	22752.5	9736.19	23078.2	21451.5	21610.1	21001.2	10754	16249.7	16033.3	15969.5	14504.9	14747.3	17056.5	25104.9	17507.6	12141.3	7218.72	21913.3	14559.9	11233.2	13855.4	14721	14324.5	22546.3	28193.1	14575.4	21047.6	4571.51	13168.6	16255.8	11377.6	7636.11	7271.73	13903	9415.96	8867.93	8508.4	21731.5	27170	9107.14	14602.7	793.96	6326.09	16451.7	12337	24755.6
UGT1A5|54579	117.39	124.51	111.78	282.49	99.27	218.05	266.06	224.94	115.62	71.03	207.73	96.43	178.9	139.35	185.81	103.6	248.43	172.17	92.62	70.54	219.99	104.01	91.55	44.77	157.64	121.41	200.9	104.71	123.65	195.27	68.41	170.93	138.88	104.85	66.38	95.51	158.81	63.29	88.06	114.39	297.24	230.45	90.11	121.08	7.91	67.45	85.97	126.23	278.26
UGT1A6|54578	14287.3	11062.6	14018.3	23376.1	30190.6	45227.2	27226.4	10482.3	12085.1	6562.01	18346.7	13291.7	9795.72	18234.8	10585.7	6468.55	15771.6	9563.23	2834.78	6142.69	22529.1	19119.4	15527.2	35278	18372.7	26410.9	35283.8	8031.34	31648.5	16633.9	59922.2	8204.37	10150.7	9050.46	12204.7	6053.69	28905.9	13135.2	16046.9	16858.1	25547	9438.55	28780.7	16537.5	41845.3	9659.58	8252.46	11168.7	27259.7
UGT1A7|54577	3.21	2.74	0	3.04	3.24	3.06	14.5	36.13	5.71	5.99	3.19	9.15	8.62	0	0	2.99	5.71	0	2.84	0	0	0	11.58	3.49	0	6.15	0	0	0	0	0	0	14.35	0	0	0	0	0	2.97	0	2.98	11.51	0	5.98	0	5.94	0	5.68	2.93
UGT1A8|54576	9.03	20.68	2.95	34.35	18.24	187.48	10.83	5.23	99.74	33.85	20.98	31.52	16.26	0	18.8	48.04	24.3	5.76	5.35	44.83	69.9	25.49	70.89	88.41	5.47	49.11	46.92	19.41	12.37	2.74	9.64	2.91	43.28	16.65	39.12	11.04	3.08	51.27	11.23	3.01	2.81	29.88	14.8	33.71	0	13.97	32.83	56.23	41.47
UGT1A9|54600	5008.35	11493.3	3472.76	11774.1	4000.62	28261.2	11381.6	10996.9	12146.9	5828.37	8272.01	8706.81	7639.37	6626.42	8840.32	9491.79	11312.3	5165.06	4377.85	4814.24	13075.9	7951.82	14000.2	12068.8	5965.42	13097.6	11777.8	5984.46	6459.52	7788.84	5807.97	4082.99	11800.4	5135.02	5873.98	3050.76	6125.35	8060.8	5485.53	5536.67	8474.97	7357.42	6467.59	8580.12	3814.29	7181.3	6991.91	9895.38	15621.5
UGT2A1|10941	53	26	146	308	93	8	115	1087	18	8	695	172	254	54	10	48	338	11	116	56	330	4	40	196	971	3	2285	42	32	60	529	14	157	81	242	258	424	14	15	578	263	375	39	336	43	3	285	1	214
UGT2A3|79799	255	708	924	233	999	4384	1168	2562	2200	599	335	952	788	1543	858	1628	2154	746	1064	1088	2015	1532	416	1103	881	2355	1503	1394	788	1901	298	367	599	709	539	782	408	1185	734	1256	941	859	625	2228	104	619	511	1187	1673
UGT2B10|7365	3757	24776	9439	6450	12621	57727	58678	32740	43582	11912	19923	22963	27520	10582	19968	40569	33842	18787	11820	14825	44473	36632	13931	24175	24076	22550	30737	14005	20988	48886	20612	7426	19555	19577	10277	15390	15701	16175	16138	6323	21188	21276	21238	11206	13909	12913	16108	11870	63725
UGT2B11|10720	50.12	313	115.87	117.7	67	765.79	517.92	721	326.23	73.55	190.73	213	361	253	229.71	189.96	296	158.9	168.47	104	604.98	576.72	227.99	130	342.95	339.8	334.85	50.77	219	486.44	121	102	166	159	65.9	187.84	179	68	176	104	273	158.95	165.87	59.02	83	173	85.68	106.46	357.59
UGT2B15|7366	8363	24484	14894	19609	12102	34317	25136	28065	31519	9296	11551	11492	13177	12872	12579	18784	22759	19970	11643	11825	23845	21046	9865	18662	13693	14084	19055	9600	23784	22917	9428	10214	19526	9632	10394	9249	13109	13586	16119	13326	18572	12061	10408	24055	7413	19849	19305	14061	37988
UGT2B28|54490	17	107	36	58	27	99	155	90	65	59	76	46	88	44	61	56	174	60	34	42	103	102	60	33	135	48	87	19	14	160	13	33	60	61	26	71	50	41	60	18	102	46	53	51	12	66	36	66	144
UGT2B4|7363	17650	43778	19054	50051	26609	91320	37900	63980	44566	20053	27779	32742	31453	22955	23881	39805	49829	17081	22178	14066	64031	42126	20609	32456	38073	44825	58503	30709	34475	46937	19984	17637	31913	20703	17358	16974	21251	22293	29172	19185	51853	35697	19015	47221	24210	23560	29263	25668	53546
UGT2B7|7364	15939	47225	22397	19904	19262	55456	46536	48391	44803	17114	30236	34254	36233	34489	33530	47278	53731	20552	20695	19205	64253	48280	25913	39004	42119	32290	44683	17168	37099	48405	28837	25896	27947	25828	24596	18052	24301	33261	31204	18418	43057	21031	37187	26939	21742	31693	33681	16375	74126
UGT3A1|133688	1551	2025	3901	2751	4845	2105	1597	6342	5328	1867	1623	2495	3101	2894	1844	7349	5127	3781	4458	1948	3956	2908	1204	3077	3631	3429	3738	3119	1847	5054	1526	2154	1587	1622	1401	2117	1089	3202	1788	2344	2332	3439	2166	6887	1375	1418	1767	1009	6442
UGT3A2|167127	16	9	59	11	25	16	32	22	15	12	9	4	5	34	3	8	10	26	9	6	26	34	10	49	13	33	30	47	6	88	8	10	9	14	5	11	7	3	8	14	8	25	5	31	15	8	8	7	27
UGT8|7368	2	0	3	0	31	1	0	0	0	0	0	0	0	1	2	0	0	0	0	5	0	0	0	1	0	1	2	0	0	4	0	1	3	0	0	0	0	14	0	9	1	0	3	1	0	0	0	0	6
[truncated: 51 more columns]

## Sheet: LUAD
Gene	TCGA-50-5930-11A-01R-1755-07	TCGA-91-6828-11A-01R-1858-07	TCGA-49-4512-11A-01R-1858-07	TCGA-44-6777-11A-01R-1858-07	TCGA-44-2668-11A-01R-1758-07	TCGA-50-5933-11A-01R-1755-07	TCGA-91-6831-11A-02R-1858-07	TCGA-50-5936-11A-01R-1628-07	TCGA-44-6145-11A-01R-1858-07	TCGA-44-3398-11B-01R-1758-07	TCGA-50-5935-11A-01R-1858-07	TCGA-55-6975-11A-01R-1949-07	TCGA-49-6742-11A-01R-1858-07	TCGA-91-6835-11A-01R-1858-07	TCGA-49-6743-11A-01R-1858-07	TCGA-55-6982-11A-01R-1949-07	TCGA-55-6984-11A-01R-1949-07	TCGA-44-2657-11A-01R-1758-07	TCGA-91-6849-11A-01R-1949-07	TCGA-55-6972-11A-01R-1949-07	TCGA-38-4632-11A-01R-1755-07	TCGA-55-6986-11A-01R-1949-07	TCGA-50-5932-11A-01R-1755-07	TCGA-44-5645-11A-01R-1628-07	TCGA-55-6970-11A-01R-1949-07	TCGA-44-2662-11A-01R-1758-07	TCGA-91-6847-11A-01R-1949-07	TCGA-38-4626-11A-01R-1758-07	TCGA-55-6981-11A-01R-1949-07	TCGA-44-6778-11A-01R-1858-07	TCGA-50-6595-11A-01R-1858-07	TCGA-44-6147-11A-01R-1858-07	TCGA-49-4490-11A-01R-1858-07	TCGA-50-5939-11A-01R-1628-07	TCGA-49-6761-11A-01R-1949-07	TCGA-38-4627-11A-01R-1758-07	TCGA-50-5931-11A-01R-1858-07	TCGA-73-4676-11A-01R-1755-07	TCGA-49-6744-11A-01R-1858-07	TCGA-55-6969-11A-01R-1949-07	TCGA-49-6745-11A-01R-1858-07	TCGA-55-6985-11A-01R-1949-07	TCGA-55-6980-11A-01R-1949-07	TCGA-38-4625-11A-01R-1758-07	TCGA-44-2665-11A-01R-1758-07	TCGA-44-2661-11A-01R-1758-07	TCGA-91-6836-11A-01R-1858-07	TCGA-44-2655-11A-01R-1758-07	TCGA-55-6968-11A-01R-1949-07
UGT1A1|54658	1	0	0	0	0	0	1	0	0	0	0	0	0	26.42	0	0	0	0	0	0	0	19.88	0	0	0	0	5.51	0	0	0	6.67	0	0	0	0	0	0	0	0	0	0	0	0	0	0	0	0	0	0
UGT1A10|54575	0	0	0	2.97	0	0	0	0	0	0	0	0	0	0	0	0	0	3.45	0	0	0	3.11	0	0	0	0	0	7.58	0	0	0	0	0	0	2.3	0	0	0	0	2.94	0	0	0	12.45	0	3.11	0	0	0
UGT1A3|54659	0	0	0	0	0	0	0	0	0	2.86	0	0	1.65	5.95	0	0	0	0	0	0	0	0	0	0	0	0	0	2.6	0	0	0	0	0	0	0	0	0	0	0	0	0	0	0	0	0	0	0	0	0
UGT1A4|54657	0	0	0	0	0	0	0	0	0	0	0	0	0	2.88	0	0	0	0	0	0	0	0	0	0	0	0	0	0	0	0	0	0	0	0	0	0	0	0	0	0	0	0	0	0	0	0	0	0	0
UGT1A5|54579	0	0	0	0	0	0	0	0	0	0	0	0	0	1.7	0	0	0	0	0	0	0	3.22	0	0	0	0	0	0	0	0	3.39	0	0	0	0	0	0	0	0	0	0	0	0	0	0	0	0	0	0
UGT1A6|54578	0	106.36	19.18	64.12	9.31	85.1	0	12	29	281.14	64	5	126.95	1020.48	1	214.83	114	15.42	79.36	16	14.33	332.21	4.21	16	17	0	58.11	222.72	4.27	29	63.94	11	35	2	6.59	8.35	4	20	28	1.62	81.04	306.28	8	156.59	29	24.97	21.41	286.38	18
UGT1A7|54577	0	0	0	0	0	0	0	0	0	0	0	0	0	0	0	0	0	0	0	0	2.67	0	0	0	0	0	0	0	0	0	0	0	0	0	0	0	0	0	0	1.44	0	0	0	0	0	0	0	0	0
UGT1A8|54576	0	0	0	0	2.69	0	0	0	0	0	0	0	0	0	0	0	0	0	0	0	0	0	0	0	0	0	0	0	0	0	0	0	0	0	2.11	0	0	0	0	0	0	0	0	0	0	0	0	0	0
UGT1A9|54600	0	2.64	5.82	4.91	0	2.9	0	0	0	0	0	0	0.41	76.57	0	7.17	0	7.13	8.64	0	0	38.57	0.79	0	0	5	5.38	11.1	9.73	0	0	0	0	0	0	12.65	0	0	7	0	8.96	25.72	0	25.97	0	7.91	12.59	18.62	0
UGT2A1|10941	0	5	11	0	0	0	0	2	1	3	1	0	0	0	0	2	3	0	5	1	0	148	0	0	0	1	2	138	0	4	2	0	6	1	0	2	0	0	0	0	2	13	0	24	0	0	0	1	0
UGT2A3|79799	0	0	0	0	10	0	0	0	1	1	0	0	0	0	0	0	2	0	0	0	0	0	0	0	0	3	0	0	0	0	0	4	0	0	0	1	0	0	0	0	0	0	0	22	0	0	0	1	0
UGT2B10|7365	0	0	0	0	0	0	0	0	0	1	0	0	0	0	0	0	1	0	0	0	0	0	0	0	0	0	0	0	0	0	0	0	0	0	0	2	0	0	0	1	0	0	0	0	0	1	0	0	1
UGT2B11|10720	0	0	0	0	0	0	0	0	0	0	0	1	0	0	0	0	0	0	0	0	0	0	0	0	0	0	0	1	0	0	0	0	0	1	0	0	0	0	0	0	1	0	0	1	0	0	1	0	0
UGT2B15|7366	0	6	8	2	0	0	0	1	0	20	6	0	32	90	1	16	45	5	4	1	3	8	1	9	0	0	4	3	1	1	6	10	3	0	0	1	1	0	1	2	24	4	2	4	2	5	2	6	1
UGT2B28|54490	0	0	0	0	0	0	0	0	0	0	0	0	0	0	0	0	0	1	0	0	0	0	0	0	0	0	0	0	0	0	0	0	0	0	0	0	0	0	0	0	0	2	0	0	0	0	0	0	0
UGT2B4|7363	8	10	4	10	9	65	40	63	10	56	21	24	6	0	102	18	30	15	15	12	36	80	28	22	31	32	10	10	16	51	49	20	0	38	25	212	20	16	25	9	0	29	9	82	87	59	23	164	38
UGT2B7|7364	11	6	5	10	13	0	0	7	18	0	6	2	0	0	9	2	7	9	4	5	0	1	0	26	7	13	10	12	7	1	4	6	65	6	0	53	16	0	3	23	2	22	5	99	17	13	8	12	26
UGT3A1|133688	1	0	1	4	4	0	0	2	0	1	0	2	3	0	0	0	0	0	0	0	0	1	1	1	0	0	0	2	3	18	0	0	1	1	2	3	0	0	2	1	0	1	0	7	0	4	2	0	1
UGT3A2|167127	3	2	1	4	3	2	2	3	0	4	2	0	0	1	1	1	1	7	7	5	2	40	1	12	5	3	0	2	1	1	1	1	0	0	1	2	1	0	1	2	0	5	0	3	3	0	0	5	2
UGT8|7368	13	78	80	54	54	38	19	36	78	76	125	34	105	48	126	26	143	85	18	24	34	108	12	77	76	60	55	57	35	68	103	39	30	51	39	82	34	25	95	35	32	105	31	100	145	133	48	186	77
[truncated: 67 more columns]

## Sheet: LUSC
Gene	TCGA-43-7657-11A-01R-2125-07	TCGA-43-5670-11A-01R-2125-07	TCGA-51-4079-11A-01R-1758-07	TCGA-56-7579-11A-01R-2045-07	TCGA-60-2709-11A-01R-1820-07	TCGA-43-6773-11A-01R-1949-07	TCGA-77-7338-11A-01R-2045-07	TCGA-58-8386-11A-01R-2296-07	TCGA-56-8201-11A-01R-2247-07	TCGA-34-7107-11A-01R-1949-07	TCGA-51-4081-11A-01R-1758-07	TCGA-85-7710-11A-01R-2125-07	TCGA-22-5478-11A-11R-1635-07	TCGA-56-8082-11A-01R-2247-07	TCGA-56-7582-11A-01R-2045-07	TCGA-56-7580-11A-01R-2045-07	TCGA-56-7731-11A-01R-2125-07	TCGA-77-7337-11A-01R-2045-07	TCGA-43-6143-11A-01R-1820-07	TCGA-39-5040-11A-01R-2125-07	TCGA-22-5483-11A-11R-1820-07	TCGA-77-7138-11A-01R-2045-07	TCGA-22-5471-11A-01R-1635-07	TCGA-56-7222-11A-01R-2045-07	TCGA-33-4587-11A-01R-2125-07	TCGA-77-8007-11A-01R-2187-07	TCGA-22-5481-11A-01R-1949-07	TCGA-22-5472-11A-11R-1635-07	TCGA-90-6837-11A-01R-1949-07	TCGA-22-4609-11A-01R-2125-07	TCGA-22-5482-11A-01R-1635-07	TCGA-43-6647-11A-01R-1820-07	TCGA-43-3394-11A-01R-1758-07	TCGA-22-5489-11A-01R-1635-07	TCGA-56-8083-11A-01R-2247-07	TCGA-33-6737-11A-01R-1820-07	TCGA-56-8309-11A-01R-2296-07	TCGA-34-8454-11A-01R-2326-07	TCGA-92-7340-11A-01R-2045-07	TCGA-77-7142-11A-01R-2045-07	TCGA-43-6771-11A-01R-1820-07	TCGA-56-7730-11A-01R-2125-07	TCGA-90-7767-11A-01R-2125-07	TCGA-77-8008-11A-01R-2187-07	TCGA-51-4080-11A-01R-1758-07	TCGA-43-7658-11A-01R-2125-07	TCGA-22-5491-11A-01R-1858-07	TCGA-22-4593-11A-01R-1820-07	TCGA-56-7823-11A-01R-2247-07
UGT1A1|54658	2.89	2.57	86.93	13.24	0	0	0	3.48	0	0	4.23	2.5	2.3	0	0	0	0	0	4	0	0	0	0	0	0	0	3.26	5.98	0	0	5.14	3.21	8.22	8.01	0	3.86	4.66	0	0	0	1	0	3.94	5.52	0	11.61	0	0	5.63
UGT1A10|54575	0	22.18	15.15	0	0	34.44	2.27	0	0	0	0	0	2.27	0	2.78	0	0	0	0	0	0	0	2.42	8.99	0	0	3.17	2.47	0	0	0	0	34.95	0	0	0	6.02	13.23	0	0	0	0	31.04	0	9.94	4.28	0	0	0
UGT1A3|54659	0	0	9.32	0	0	2.69	0	0	0	2.56	2.68	0	0	0	0	0	0	0	3.03	0	0	0	0	0	0	0	0	1.48	0	0	0	0	0	0	0	3.02	0	0	3.07	0	0	0	0	0	0	0	0	0	0
UGT1A4|54657	0	0	3.02	0	0	0	0	2.34	0	0	0	0	0	0	0	0	0	0	0	0	0	1.93	0	0	0	0	0	0	0	0	0	0	0	1.84	0	0	0	0	0	0	0	1.74	0	0	0	0	0	0	5.55
UGT1A5|54579	0	0	0	0	0	0	0	0	0	0	1.51	0	0	0	0	0	0	0	0	0	0	0	0	0	0	0	0	0	0	0	0	0	2.77	1.87	0	0	0	0	0	0	0	0	0	0	0	0	0	0	0
UGT1A6|54578	270.92	220.85	113.8	163.55	108.11	116.86	33.04	157.62	16	184.36	358.12	59.67	28.44	76.52	277.61	6	106.47	17.51	37.27	8.58	6.1	48.07	77.98	13.01	84.49	196	99.56	498.52	23	25	264.49	19.79	1200.96	373.03	18	161.12	176.98	2.51	70.93	23.6	0	357.77	106.5	149	257.51	203.89	8	6	83.77
UGT1A7|54577	0	0	28.78	1.82	0	0	0	0	0	0	91.97	0	0	0	0	0	0	0	0	0	0	0	0	0	0	0	0	0	0	0	0	0	47.79	0	0	0	0	3.23	0	3.4	0	219.33	0	0	10.51	0	0	0	0
UGT1A8|54576	1.75	1.85	0	0	0	0	0	0	0	0	0	4.82	0	3.48	0	0	0	0	0	0	0	0	0	0	0	0	0	0	0	0	0	0	4.79	0	0	0	0	3.03	0	0	0	9.42	1.41	0	0	0	0	0	0
UGT1A9|54600	19.44	26.54	0	11.39	18.89	0	5.69	5.57	0	4.08	1.5	0	3.99	0	0.61	0	25.53	4.49	9.7	4.42	2.9	0	11.61	0	19.51	0	1.01	35.56	0	0	6.37	0	96.52	7.26	0	0	35.35	0	0	0	0	1.74	59.1	5.48	8.04	19.22	0	0	1.05
UGT2A1|10941	0	795	1	2	44	2	0	0	0	32	2	0	2	1	1	0	0	0	0	0	0	16	9	0	0	0	27	2	1	1	1	0	44	1	0	1	167	0	11	0	0	1	38	0	0	13	0	0	1
UGT2A3|79799	0	0	4	1	0	0	2	0	1	1	5	0	0	1	1	0	1	0	3	0	0	0	2	0	0	2	0	2	1	0	0	2	1	0	0	0	0	0	0	0	0	0	1	0	4	0	0	0	0
UGT2B10|7365	0	0	37	0	0	0	0	0	0	0	5	1	0	0	0	0	0	0	2	1	0	0	0	0	0	0	1	3	0	0	0	0	7	0	0	0	0	0	0	0	1	1	0	2	2	0	0	0	0
UGT2B11|10720	5	0	88.95	0	0	0	0	0	0	0	0	2	0	1	0	0	0	0	0	0	0	0	0	0	0	0	0	0	0	2	0	0	0	0	1	0	0	0	0	0	0	0	0	0	0	0	0	0	0
UGT2B15|7366	1	5	64	7	4	0	2	4	3	16	11	37	1	0	4	0	0	6	3	5	2	3	5	0	4	10	5	23	2	0	9	1	15	6	0	10	2	2	5	2	1	3	0	0	33	1	2	1	2
UGT2B28|54490	0	2	0	0	0	0	0	0	0	0	0	0	0	0	0	0	0	0	0	0	0	0	0	0	0	0	0	0	0	0	0	0	0	0	0	0	0	0	0	0	0	0	0	0	0	0	0	0	0
UGT2B4|7363	70	42	132	40	17	28	41	42	22	34	178	6	0	5	26	70	28	17	37	25	44	64	77	9	41	105	69	66	73	27	278	91	68	1	19	142	43	40	85	37	100	24	99	22	165	98	0	133	61
UGT2B7|7364	9	4	136	1	11	3	7	10	4	4	33	5	5	1	13	1	13	0	42	0	0	0	27	25	43	42	11	1	9	3	9	45	13	9	9	9	0	0	4	5	8	13	22	14	13	10	44	29	2
UGT3A1|133688	0	0	2	1	0	1	0	1	6	2	4	2	5	1	2	7	3	0	0	0	0	2	5	2	0	0	1	2	0	1	0	3	14	2	4	0	0	0	0	4	2	0	1	0	6	3	0	1	1
UGT3A2|167127	6	14	9	10	5	3	0	10	0	11	17	7	4	6	8	11	0	5	18	8	3	6	10	2	2	2	2	7	6	15	11	2	25	6	0	15	5	61	4	5	1	4	1	3	14	24	0	3	3
UGT8|7368	114	151	221	98	12	27	40	66	66	81	243	240	8	37	123	98	34	74	93	62	296	116	91	86	81	138	81	152	220	141	93	56	518	95	34	77	34	100	148	94	124	55	151	48	113	100	135	322	71
[truncated: 53 more columns]

## Sheet: PRAD
Gene	TCGA-EJ-7314-11A-01R-2118-07	TCGA-CH-5769-11A-01R-1580-07	TCGA-EJ-7123-11A-01R-1965-07	TCGA-EJ-7783-11A-01R-2118-07	TCGA-EJ-7315-11A-01R-2118-07	TCGA-HC-7819-11A-01R-2118-07	TCGA-HC-7211-11A-01R-2118-07	TCGA-CH-5761-11A-01R-1580-07	TCGA-G9-6363-11A-01R-1789-07	TCGA-HC-7737-11A-02R-2118-07	TCGA-HC-7747-11A-01R-2118-07	TCGA-EJ-7125-11A-01R-1965-07	TCGA-EJ-7797-11A-01R-2263-07	TCGA-EJ-7792-11A-01R-2118-07	TCGA-EJ-7321-11A-01R-2263-07	TCGA-HC-8260-11A-01R-2263-07	TCGA-CH-5767-11B-01R-1789-07	TCGA-EJ-7331-11A-01R-2118-07	TCGA-G9-6496-11A-01R-1789-07	TCGA-HC-8262-11A-01R-2263-07	TCGA-G9-6348-11A-01R-1789-07	TCGA-HC-7740-11A-01R-2118-07	TCGA-EJ-7794-11A-01R-2118-07	TCGA-G9-6351-11A-01R-1965-07	TCGA-J4-A83J-11A-11R-A36G-07	TCGA-EJ-7317-11A-01R-2118-07	TCGA-G9-6333-11A-01R-1965-07	TCGA-EJ-7328-11A-01R-2118-07	TCGA-EJ-7115-11A-01R-2118-07	TCGA-HC-7745-11A-01R-2118-07	TCGA-HC-7752-11A-01R-2118-07	TCGA-CH-5768-11A-01R-1580-07	TCGA-EJ-7327-11A-01R-2118-07	TCGA-G9-6365-11A-01R-1789-07	TCGA-G9-6384-11A-01R-1858-07	TCGA-EJ-A8FO-11A-11R-A36G-07	TCGA-HC-7738-11A-01R-2118-07	TCGA-G9-6342-11A-02R-1965-07	TCGA-EJ-7789-11A-01R-2118-07	TCGA-EJ-7786-11A-01R-2118-07	TCGA-HC-7742-11A-01R-2118-07	TCGA-EJ-7330-11A-01R-2118-07	TCGA-HC-8259-11A-01R-2263-07	TCGA-EJ-7785-11A-01R-2118-07	TCGA-G9-6362-11A-01R-1789-07	TCGA-EJ-7781-11A-01R-2118-07	TCGA-HC-8258-11A-01R-2263-07	TCGA-EJ-7782-11A-01R-2118-07	TCGA-G9-6356-11A-01R-1789-07
UGT1A1|54658	17.87	194.51	0	0	2.54	0	0	0	38.94	13.16	11.25	0	0	0	7.64	0	8.39	0	0	82.39	0	0	0	0	0	5.82	0	0	22.37	2.81	0	0	0	10.94	0	4.77	4.28	0	4	0	0	0	6.12	0	7.04	0	0	3.73	4.89
UGT1A10|54575	0	0	0	2.73	2.49	0	0	0	26.39	0	0	0	0	4.11	17.7	0	5.46	0	14.34	138.15	10.96	0	0	0	8.01	3.25	33.96	0	0	0	0	7.3	0	21.56	0	21.67	0	0	8.85	0	0	0	5.97	0	0	0	0	9.75	57.73
UGT1A3|54659	19.77	1920.96	0	0	2.56	18.64	0	108.65	334.29	0	0	20.17	1.38	2.82	18.26	16.6	42.34	98.48	7.49	15.57	0	0	24.06	3.49	50.82	5.88	0	5.6	368.45	0	0	3.25	10.64	0	0	6.42	0	21.24	34.96	17.05	61.39	9.89	21.65	64.57	7.14	1.9	0	6.16	5.89
UGT1A4|54657	0	24.67	0	0	0	0	0	3.02	0	2.76	0	0	0	0	0	0	0	2.83	0	1.44	0	0	0	0	0	0	0	0	10.92	0	0	0	0	3.51	0	0	0	0	2.62	0	0	0	0	0	0	0	0	0	0
UGT1A5|54579	0	19.69	0	0	0	0	0	6.21	9.12	0	0	0	0	0	0	0	0	0	0	1.46	0	0	0	0	0	0	0	0	5.63	0	0	0	0	0	0	0	0	0	0	0	0	0	0	0	0	0	0	0	0
UGT1A6|54578	25.16	265.32	8.01	8.27	85.4	51.2	174.16	94.65	246.04	763.05	194.95	34.54	111.66	175.4	97.13	69.4	552.14	7.71	263.96	1266.89	23.04	283.36	241.97	43.3	61.39	57.27	389.3	26.28	187.44	814.73	21	69.35	25.09	347.35	15.57	100.41	242.73	129	225.96	32.93	46.3	171.89	61.28	2.28	0	41.92	507.03	190.35	334.35
UGT1A7|54577	0	0	0	0	0	0	0	0	0	0	0	0	0	0	0	0	2.86	0	0	0	0	0	0	0	0	0	0	0	0	0	0	0	0	0	0	0	0	0	0	0	0	0	0	2.52	0	0	0	0	0
UGT1A8|54576	2.69	24.19	2.99	0	64	0	0	2.96	118.4	0	0	0	0	1.38	19.26	0	109.92	27.61	0	507.05	0	3	31.62	16.21	15.49	2.78	13.12	21.33	8.03	0	0	3.1	15.27	52.64	5.43	82.26	1.71	6.75	12.88	54.17	0	7.22	5.91	0	0	8.49	0	12.01	7.53
UGT1A9|54600	2.52	412.65	0	0	0	10.16	40.84	8.51	88.83	10.03	49.8	10.29	10.95	20.28	0	0	73.89	13.37	24.2	126.07	0	65.64	44.35	0	27.29	0	89.62	2.79	41.17	49.46	0	0	0	0	0	14.47	50.29	0	16.73	9.86	11.32	0	16.07	20.63	13.82	16.69	13.97	0	9.61
UGT2A1|10941	2	0	0	3	1	0	0	0	0	0	1	0	3	1	1	1	0	0	2	0	1	0	1	1	1	0	0	0	0	3	0	0	0	1	0	1	0	0	1	6	2	1	3	0	0	0	0	2	0
UGT2A3|79799	0	5	0	0	1	0	0	0	0	28	0	0	0	0	1	0	0	0	0	0	0	13	0	0	1	0	0	0	10	0	0	0	0	1	0	0	4	0	0	0	0	0	3	0	0	0	1	0	0
UGT2B10|7365	4	210	0	0	0	0	0	0	332	12	1	1	0	0	0	0	0	0	0	0	0	0	1	0	1	0	0	0	27	4	0	0	0	0	0	0	3	0	1	0	0	0	1	0	7	0	3	0	0
UGT2B11|10720	3	3	0	1	1	1	0	0	11	0	0	1	0	0	0	0	1	0	0	0	0	0	3	0	0	1	0	1	2	0	1	0	0	2	0	1	0	1	0	0	0	0	0	3	53	0	0	5	10
UGT2B15|7366	110	2691	1	9	8	7	1	35	7331	2	8	17	24	60	134	6	38	6	27	88	3	5	234	2	110	2	65	19	360	12	7	9	4	138	5	9	2	64	73	7	16	3	4	11	1	21	4	191	218
UGT2B28|54490	3	0	0	0	0	0	0	1	2	0	0	0	1	0	0	0	9	0	0	0	0	0	7	0	4	0	0	0	0	0	1	0	1	8	0	3	0	1	0	1	0	0	0	0	13	0	0	10	11
UGT2B4|7363	72	56	39	29	20	6	0	0	1773	0	0	20	6	3	13	1	29	7	8	6	16	0	2	13	244	1	6	5	63	1	0	1	1	1	4	5	0	14	2	20	30	2	3	25	15	10	0	3	8
UGT2B7|7364	4	2	0	1	1	0	359	7	2	1307	254	2	7	0	0	3	70	0	3	11	1	670	74	4	0	1	45	4	1	557	0	2	0	24	0	22	121	0	28	3	2	4	0	6	0	3	639	4	0
UGT3A1|133688	16	1	75	28	54	66	4	0	6	36	1	146	10	19	13	32	6	48	5	66	21	12	5	10	31	1	4	32	8	3	119	0	192	4	20	2	3	71	0	187	5	8	119	81	0	123	53	1	2
UGT3A2|167127	15	10	40	11	47	121	0	1	32	19	2	67	43	17	20	15	9	147	12	19	22	2	18	2	18	6	5	59	25	2	83	4	128	21	7	6	5	37	9	124	9	53	55	47	6	73	9	20	6
UGT8|7368	20	12	25	23	41	33	125	14	64	255	86	28	27	21	57	45	26	24	13	22	7	46	118	15	29	11	70	33	17	27	8	11	12	36	11	37	31	34	33	19	24	37	37	27	4	52	92	44	29
[truncated: 55 more columns]

[truncated: 2 more sheets: STAD, THCA]
