# Supplementary material for: The Expression Profiles and Deregulation of UDP-Glycosyltransferase (UGT) Genes in Human Cancers and Their Association with Clinical Outcomes
Source: Cancers (Basel). 2021 Sep 6;13(17):4491. doi: 10.3390/cancers13174491 (PMC8430925; doi:10.3390/cancers13174491)
Supplement: Supplementary file 1 [file cancers-13-04491-s001.zip › Table S4.xlsx]

## Sheet: BRCA
Gene	baseMean_Normal	baseMean_Tumour	baseMean	log2FoldChange	lfcSE	stat	pvalue	padj
UGT1A6	33.4951	403.423	36.6196	1.23046	0.449502	2.73739	0.00619292	0.0085336
UGT2B11	2471.01	4482.03	3191.36	1.23762	0.49557	2.49736	0.0125122	0.016753
UGT2B15	287.098	216.994	229.928	-0.733006	0.3311	-2.21385	0.0268389	0.0346641
UGT2B28	1359.46	823.368	247.442	-1.97114	0.494771	-3.98394	6.77823e-05	0.000110895
UGT2B4	29.0588	747.641	35.7513	0.547032	0.386189	1.41649	0.156632	0.183347
UGT3A2	18.3993	171.623	30.7779	1.67518	0.297613	5.62872	1.81557e-08	3.84956e-08
UGT8	333.05	313.659	323.355	-0.0864641	0.27388	-0.315701	0.75223	0.778524

## Sheet: COAD
Gene	baseMean_Normal	baseMean_Tumour	baseMean	log2FoldChange	lfcSE	stat	pvalue	padj
UGT1A1	370.782	52.6288	211.706	-2.81863	0.572434	-4.92394	8.48204e-07	2.73604e-06
UGT1A10	5950.64	358.106	3154.37	-4.05486	0.300253	-13.5048	1.46455e-41	2.18116e-39
UGT1A6	290.645	321.482	306.064	0.145726	0.39268	0.371106	0.710559	0.757072
UGT1A8	1896.66	69.6228	983.142	-4.76761	0.381959	-12.482	9.36043e-36	7.70193e-34
UGT1A9	243.747	22.4577	133.102	-3.44232	0.495323	-6.94965	3.66189e-12	2.32665e-11
UGT2A3	4863.22	305.584	2584.4	-3.99239	0.403182	-9.90221	4.0718e-23	9.32943e-22
UGT2B10	21.7229	85.5473	14.3899	-1.62	0.436931	-3.70769	0.000209161	0.000473049
UGT2B15	5506.93	521.421	3014.18	-3.40056	0.529426	-6.4231	1.33523e-10	7.0868e-10
UGT2B4	0.400224	54.5753	1.02349	1.93127	1.07497	1.79658	0.0724016	0.102119
UGT2B7	263.896	272.777	190.298	-1.1777	0.399423	-2.9485	0.00319325	0.00592474
UGT8	1783.2	1712.52	1747.86	-0.0584689	0.174499	-0.335067	0.737575	0.780219

## Sheet: HNSC
Gene	baseMean_Normal	baseMean_Tumour	baseMean	log2FoldChange	lfcSE	stat	pvalue	padj
UGT1A10	778.264	822.821	800.542	0.0802811	0.71378	0.112473	0.910448	0.930422
UGT1A6	2218.97	2830.77	2524.87	0.351304	0.43944	0.799436	0.424038	0.502482
UGT1A7	2813.65	1675.36	2244.51	-0.747967	0.684894	-1.09209	0.274793	0.347676
UGT1A8	411.513	64.2462	237.88	-2.67857	0.649545	-4.12377	3.72725e-05	0.000115549
UGT1A9	191.81	263.742	227.776	0.459528	0.549943	0.835591	0.403385	0.481765
UGT2A1	98.389	16.0301	35.4928	-2.69439	0.848637	-3.17496	0.00149858	0.00335463
UGT8	149.969	329.298	239.634	1.13464	0.385437	2.94378	0.00324229	0.00674782

## Sheet: KICH
Gene	baseMean_Normal	baseMean_Tumour	baseMean	log2FoldChange	lfcSE	stat	pvalue	padj
UGT1A6	4755.5	1207.39	2981.45	-1.97762	0.615465	-3.21322	0.00131257	0.0024077
UGT1A9	8757.91	37.9527	4397.93	-7.84928	0.787821	-9.96328	2.20671e-23	3.36382e-22
UGT2A1	295.856	34.9823	165.419	-3.07874	0.693499	-4.43943	9.01985e-06	2.24449e-05
UGT2A3	3055.1	2.60366	1528.85	-10.1285	0.466685	-21.7031	1.91817e-104	2.85673e-101
UGT2B7	20478.5	184.227	10331.4	-6.79599	0.671326	-10.1232	4.35771e-24	7.06196e-23
UGT3A1	4017.18	5.8864	2011.53	-9.37393	0.43644	-21.4782	2.49158e-102	3.09226e-99
UGT3A2	130.426	10.9242	70.6752	-3.56335	0.617766	-5.76812	8.01587e-09	2.90392e-08
UGT8	3812.6	6693.03	5252.82	0.81187	0.25069	3.23854	0.00120144	0.00221751

## Sheet: KIRC
Gene	baseMean_Normal	baseMean_Tumour	baseMean	log2FoldChange	lfcSE	stat	pvalue	padj
UGT1A1	17.0612	82.2878	49.6745	2.27229	0.343459	6.6159	3.693e-11	9.6916e-11
UGT1A10	37.2469	460.331	236.056	5.29017	0.586326	9.02257	1.83721e-19	7.84e-19
UGT1A3	6.80499	92.2218	49.5134	3.75957	0.356706	10.5397	5.66941e-26	3.34925e-25
UGT1A6	6976.2	9739.02	8357.61	0.481345	0.21379	2.25149	0.0243547	0.0320278
UGT1A7	19.4697	83.3173	15.7137	1.70127	0.480497	3.54065	0.000399144	0.000630979
UGT1A8	136.488	244.087	153.934	0.328665	0.374301	0.878078	0.379901	0.419257
UGT1A9	17327	12187.2	14757.1	-0.507645	0.344839	-1.47212	0.140987	0.167696
UGT2A1	470.884	5.18848	238.036	-6.50463	0.51108	-12.7272	4.17451e-37	4.33852e-36
UGT2A3	4930.1	10877.6	7903.85	1.1417	0.212901	5.36259	8.20385e-08	1.73329e-07
UGT2B10	63.6435	49.1441	56.3938	-0.371858	0.247274	-1.50383	0.132625	0.158408
UGT2B7	32395	10775.5	21585.2	-1.58801	0.269049	-5.90229	3.5848e-09	8.31206e-09
UGT3A1	5690.93	2959.55	4325.24	-0.943271	0.272488	-3.46169	0.000536791	0.000838957
UGT3A2	161.856	24.2231	93.0395	-2.74165	0.277965	-9.8633	6.00421e-23	3.02916e-22
UGT8	4228.46	1193.5	2710.98	-1.82515	0.150803	-12.1029	1.01977e-33	8.9128e-33

## Sheet: KIRP
Gene	baseMean_Normal	baseMean_Tumour	baseMean	log2FoldChange	lfcSE	stat	pvalue	padj
UGT1A6	7157.57	16423.8	11790.7	1.19824	0.43104	2.77988	0.00543791	0.0104892
UGT1A8	113.579	72.7782	93.1788	-0.642342	0.726119	-0.884624	0.376359	0.449379
UGT1A9	21618	7445.58	14531.8	-1.53777	0.599782	-2.56388	0.0103508	0.018813
UGT2A1	339.879	51.6276	195.753	-2.71833	0.745788	-3.64492	0.000267478	0.000672557
UGT2A3	4639.17	7133.3	5886.24	0.6207	0.437924	1.41737	0.156375	0.210303
UGT2B10	118.031	46.4465	82.2386	-1.34578	0.367563	-3.66136	0.000250883	0.000633825
UGT2B7	41958.4	6931.12	24444.8	-2.59778	0.420518	-6.17758	6.50903e-10	3.98762e-09
UGT3A1	6626.01	4147.81	5386.91	-0.675803	0.476149	-1.41931	0.155809	0.209712
UGT3A2	207.674	327.519	267.596	0.657228	0.591527	1.11107	0.266538	0.33425
UGT8	2935.75	925.96	1930.85	-1.66481	0.255511	-6.51559	7.24023e-11	5.03168e-10

## Sheet: LIHC
Gene	baseMean_Normal	baseMean_Tumour	baseMean	log2FoldChange	lfcSE	stat	pvalue	padj
UGT1A1	22831.2	15509.1	19170.1	-0.557892	0.316549	-1.76242	0.0779986	0.11059
UGT1A10	4.07576	194.89	99.4827	5.5777	0.77385	7.20773	5.68916e-13	4.81413e-12
UGT1A3	2115.26	2149.04	2132.15	0.022847	0.345484	0.0661304	0.947274	0.956782
UGT1A4	17701.7	11802.5	14752.1	-0.584795	0.342375	-1.70806	0.0876257	0.122651
UGT1A5	169.564	132.451	151.007	-0.357029	0.289741	-1.23223	0.217862	0.274361
UGT1A6	24224.4	20456.6	22340.5	-0.243894	0.298593	-0.816811	0.414037	0.478895
UGT1A7	4.42807	95.7868	8.19297	1.43258	0.599292	2.39046	0.0168272	0.0279165
UGT1A8	35.2059	63.496	34.4034	-0.061754	0.403847	-0.152914	0.878466	0.900598
UGT1A9	10268.3	6992.11	8630.2	-0.554385	0.215565	-2.57178	0.0101178	0.0175889
UGT2A1	303.848	138.648	221.248	-1.13203	0.50232	-2.25361	0.0242204	0.0387574
UGT2A3	1290.02	1384.62	1337.32	0.102168	0.308	0.331715	0.740104	0.783674
UGT2B10	27102.4	9648.81	18375.6	-1.49001	0.251162	-5.93245	2.98446e-09	1.54011e-08
UGT2B11	276.26	1474.65	875.456	2.4164	0.326741	7.39547	1.40907e-13	1.30424e-12
UGT2B15	19786.3	13771.8	16779	-0.522786	0.233399	-2.23988	0.0250985	0.0400035
UGT2B28	80.9673	57.7235	69.3454	-0.488412	0.240616	-2.02985	0.0423723	0.0641507
UGT2B4	39502.5	36613.4	38057.9	-0.109576	0.218675	-0.50109	0.616308	0.672839
UGT2B7	40498.1	10851	25674.5	-1.90004	0.253035	-7.50901	5.95746e-14	5.79898e-13
UGT3A1	3399.37	3409.09	3404.23	0.00411968	0.318305	0.0129425	0.989674	0.991338
UGT3A2	20.7496	70.3412	45.5454	1.76081	0.383278	4.59408	4.34671e-06	1.36021e-05

## Sheet: LUAD
Gene	baseMean_Normal	baseMean_Tumour	baseMean	log2FoldChange	lfcSE	stat	pvalue	padj
UGT1A6	72.5573	784.65	208.665	2.71367	0.423688	6.40488	1.50485e-10	4.81557e-10
UGT2B15	6.1796	287.78	16.4223	2.59578	0.404727	6.41366	1.42067e-10	4.55503e-10
UGT8	65.2753	351.859	208.567	2.43014	0.223525	10.8719	1.56906e-27	1.6273e-26

## Sheet: LUSC
Gene	baseMean_Normal	baseMean_Tumour	baseMean	log2FoldChange	lfcSE	stat	pvalue	padj
UGT1A10	4.65739	2162.22	1083.44	8.86832	0.929279	9.54323	1.38454e-21	6.77844e-21
UGT1A6	126.426	6145.74	3136.08	5.60329	0.390334	14.3551	9.89655e-47	1.62502e-45
UGT1A7	7.74367	2365.44	1183.8	10.0747	0.899479	11.2006	4.04898e-29	2.95595e-28
UGT1A9	8.43131	552.746	280.588	6.03531	0.494775	12.1981	3.18208e-34	3.00132e-33
UGT2A1	22.874	1245.1	40.7687	4.04272	0.602756	6.70706	1.98588e-11	5.19237e-11
UGT8	103.411	707.009	405.21	2.77301	0.280389	9.88987	4.60622e-23	2.44617e-22

## Sheet: PRAD
Gene	baseMean_Normal	baseMean_Tumour	baseMean	log2FoldChange	lfcSE	stat	pvalue	padj
UGT1A3	64.4125	718.168	107.173	2.78448	0.501597	5.55123	2.83674e-08	1.49021e-07
UGT1A6	193.055	81.9542	137.505	-1.23613	0.35182	-3.51353	0.000442194	0.00108173
UGT1A9	28.9564	162.485	33.3836	1.1147	0.521459	2.13766	0.0325441	0.0535735
UGT2B15	213.223	191.421	43.0952	0.0789765	0.401115	0.196892	0.843912	0.881229
UGT2B4	45.3103	511.873	264.58	4.8873	0.44863	10.8938	1.23338e-27	2.62411e-25
UGT2B7	104.321	1.8273	53.0741	-5.83561	0.641287	-9.09984	9.04663e-20	4.31832e-18

[truncated: 2 more sheets: STAD, THCA]
