# Supplementary material for: The Expression Profiles and Deregulation of UDP-Glycosyltransferase (UGT) Genes in Human Cancers and Their Association with Clinical Outcomes
Source: Cancers (Basel). 2021 Sep 6;13(17):4491. doi: 10.3390/cancers13174491 (PMC8430925; doi:10.3390/cancers13174491)
Supplement: Supplementary file 1 [file cancers-13-04491-s001.zip › Table S5.xlsx]

## Sheet: ACC
bcr_patient_uuid	bcr_patient_barcode	bcr_drug_barcode	bcr_drug_uuid	form_completion_date	pharmaceutical_therapy_drug_name	clinical_trial_drug_classification	pharmaceutical_therapy_type	pharmaceutical_tx_started_days_to	pharmaceutical_tx_ongoing_indicator	pharmaceutical_tx_ended_days_to	treatment_best_response	days_to_stem_cell_transplantation	number_cycles	pharm_regimen	pharm_regimen_other	prescribed_dose	prescribed_dose_units	regimen_indication	regimen_indication_notes	regimen_number	route_of_administration	stem_cell_transplantation	stem_cell_transplantation_type	therapy_type_notes	total_dose	total_dose_units	tx_on_clinical_trial
bcr_patient_uuid	bcr_patient_barcode	bcr_drug_barcode	bcr_drug_uuid	form_completion_date	drug_name	clinical_trail_drug_classification	therapy_type	days_to_drug_therapy_start	therapy_ongoing	days_to_drug_therapy_end	measure_of_response	days_to_stem_cell_transplantation	number_cycles	pharm_regimen	pharm_regimen_other	prescribed_dose	prescribed_dose_units	regimen_indication	regimen_indication_notes	regimen_number	route_of_administration	stem_cell_transplantation	stem_cell_transplantation_type	therapy_type_notes	total_dose	total_dose_units	tx_on_clinical_trial
CDE_ID:	CDE_ID:2003301	CDE_ID:	CDE_ID:	CDE_ID:	CDE_ID:2975232	CDE_ID:3378323	CDE_ID:2793530	CDE_ID:3392465	CDE_ID:3103479	CDE_ID:3392470	CDE_ID:2857291	CDE_ID:3414613	CDE_ID:62590	CDE_ID:3366758	CDE_ID:3366930	CDE_ID:2184728	CDE_ID:3065815	CDE_ID:2793511	CDE_ID:2793516	CDE_ID:2744948	CDE_ID:2003586	CDE_ID:3090688	CDE_ID:2730901	CDE_ID:2001762	CDE_ID:1515	CDE_ID:3088785	CDE_ID:3925111
FB54458D-C373-46C2-841E-82663E13EFAA	TCGA-OR-A5JM	TCGA-OR-A5JM-D49539	B4F66718-B197-4EFB-AF9B-380B238BF6B5	41550	sunitinib	[Not Available]	Targeted Molecular therapy	378	NO	439	Clinical Progressive Disease	[Not Available]	[Not Available]	[Not Available]	[Not Available]	[Not Available]	[Not Available]	[Not Available]	[Not Applicable]	[Not Available]	[Not Available]	[Not Available]	[Not Available]	[Not Available]	[Not Available]	[Not Available]	NO
FB54458D-C373-46C2-841E-82663E13EFAA	TCGA-OR-A5JM	TCGA-OR-A5JM-D49540	2B5DD32A-1F38-4899-A90F-77C16B1F900E	41550	ketoconazole	[Not Available]	Targeted Molecular therapy	378	NO	439	Clinical Progressive Disease	[Not Available]	[Not Available]	[Not Available]	[Not Available]	[Not Available]	[Not Available]	[Not Available]	[Not Applicable]	[Not Available]	[Not Available]	[Not Available]	[Not Available]	[Not Available]	[Not Available]	[Not Available]	NO
344F7EA4-2BD4-4F2D-89F2-9FC7F572A3D6	TCGA-OR-A5JY	TCGA-OR-A5JY-D48310	1125569B-151B-4740-A864-9F8BFC63E2B4	41528	xeloda	[Not Available]	Chemotherapy	78	NO	93	[Unknown]	[Not Available]	[Not Available]	[Not Available]	[Not Available]	[Not Available]	[Not Available]	[Not Available]	[Not Applicable]	[Not Available]	[Not Available]	[Not Available]	[Not Available]	[Not Available]	[Not Available]	[Not Available]	NO
6D980941-219E-40A0-9B41-E84C3FB0BD1A	TCGA-OR-A5K2	TCGA-OR-A5K2-D48215	3C5B0FF6-2A7C-456E-8662-D38484AA7F3C	41527	Adriamycin	[Not Available]	Chemotherapy	118	NO	298	[Unknown]	[Not Available]	[Not Available]	[Not Available]	[Not Available]	[Not Available]	[Not Available]	[Not Available]	[Not Applicable]	[Not Available]	[Not Available]	[Not Available]	[Not Available]	[Not Available]	[Not Available]	[Not Available]	NO
6D980941-219E-40A0-9B41-E84C3FB0BD1A	TCGA-OR-A5K2	TCGA-OR-A5K2-D48216	529C2145-589C-4DAF-B2DE-B256C181EFC6	41527	Cisplatin	[Not Available]	Chemotherapy	118	NO	298	[Unknown]	[Not Available]	[Not Available]	[Not Available]	[Not Available]	[Not Available]	[Not Available]	[Not Available]	[Not Applicable]	[Not Available]	[Not Available]	[Not Available]	[Not Available]	[Not Available]	[Not Available]	[Not Available]	NO
6D980941-219E-40A0-9B41-E84C3FB0BD1A	TCGA-OR-A5K2	TCGA-OR-A5K2-D48217	30E49257-AF92-4C80-9DA6-2EA6444DCB07	41527	carboplatin	[Not Available]	Chemotherapy	118	NO	299	[Unknown]	[Not Available]	[Not Available]	[Not Available]	[Not Available]	[Not Available]	[Not Available]	[Not Available]	[Not Applicable]	[Not Available]	[Not Available]	[Not Available]	[Not Available]	[Not Available]	[Not Available]	[Not Available]	NO
6D980941-219E-40A0-9B41-E84C3FB0BD1A	TCGA-OR-A5K2	TCGA-OR-A5K2-D48219	D2547FC3-E37D-4BB0-BED0-C4A5989CD685	41527	etoposide	[Not Available]	Chemotherapy	118	NO	298	[Unknown]	[Not Available]	[Not Available]	[Not Available]	[Not Available]	[Not Available]	[Not Available]	[Not Available]	[Not Applicable]	[Not Available]	[Not Available]	[Not Available]	[Not Available]	[Not Available]	[Not Available]	[Not Available]	NO
A5BE4E42-CB6C-4E67-8547-45DBD058BB95	TCGA-OU-A5PI	TCGA-OU-A5PI-D45486	DEC40BA5-E688-457A-92B6-FDCC166D3321	41471	Etoposide	[Not Available]	Chemotherapy	69	NO	239	Stable Disease	[Not Available]	[Not Available]	[Not Available]	[Not Available]	[Not Available]	[Not Available]	[Not Available]	[Not Applicable]	[Not Available]	[Not Available]	[Not Available]	[Not Available]	[Not Available]	[Not Available]	[Not Available]	NO
A5BE4E42-CB6C-4E67-8547-45DBD058BB95	TCGA-OU-A5PI	TCGA-OU-A5PI-D45487	3511FDB0-AA74-42F8-A96F-22043A6186D2	41471	doxorubicin	[Not Available]	Chemotherapy	69	NO	239	Stable Disease	[Not Available]	[Not Available]	[Not Available]	[Not Available]	[Not Available]	[Not Available]	[Not Available]	[Not Applicable]	[Not Available]	[Not Available]	[Not Available]	[Not Available]	[Not Available]	[Not Available]	[Not Available]	NO
A5BE4E42-CB6C-4E67-8547-45DBD058BB95	TCGA-OU-A5PI	TCGA-OU-A5PI-D45488	C4F9820C-381E-4EA5-86E2-C6BE026BAF87	41471	cisplatin	[Not Available]	Chemotherapy	55	NO	239	Stable Disease	[Not Available]	[Not Available]	[Not Available]	[Not Available]	[Not Available]	[Not Available]	[Not Available]	[Not Applicable]	[Not Available]	[Not Available]	[Not Available]	[Not Available]	[Not Available]	[Not Available]	[Not Available]	NO
A5BE4E42-CB6C-4E67-8547-45DBD058BB95	TCGA-OU-A5PI	TCGA-OU-A5PI-D45489	FAC3DF36-8C2F-4DE8-AA0B-36EAC3A6A9D0	41471	mitotane	[Not Available]	Chemotherapy	69	NO	239	Stable Disease	[Not Available]	[Not Available]	[Not Available]	[Not Available]	[Not Available]	[Not Available]	[Not Available]	[Not Applicable]	[Not Available]	[Not Available]	[Not Available]	[Not Available]	[Not Available]	[Not Available]	[Not Available]	NO
A5BE4E42-CB6C-4E67-8547-45DBD058BB95	TCGA-OU-A5PI	TCGA-OU-A5PI-D65713	24E5DD42-A517-41EB-96B5-31B361E509AF	41911	carboplatin	[Not Available]	Chemotherapy	605	NO	694	Stable Disease	[Not Available]	[Not Available]	[Not Available]	[Not Available]	[Not Available]	[Not Available]	[Not Available]	[Not Applicable]	[Not Available]	[Not Available]	[Not Available]	[Not Available]	[Not Available]	[Not Available]	[Not Available]	NO
A5BE4E42-CB6C-4E67-8547-45DBD058BB95	TCGA-OU-A5PI	TCGA-OU-A5PI-D65714	EDE41FC6-31AC-48CC-90D7-34982230C4E6	41911	etoposide	[Not Available]	Chemotherapy	605	NO	694	Stable Disease	[Not Available]	[Not Available]	[Not Available]	[Not Available]	[Not Available]	[Not Available]	[Not Available]	[Not Applicable]	[Not Available]	[Not Available]	[Not Available]	[Not Available]	[Not Available]	[Not Available]	[Not Available]	NO
A5BE4E42-CB6C-4E67-8547-45DBD058BB95	TCGA-OU-A5PI	TCGA-OU-A5PI-D65715	5210E184-AB88-43FB-AA3E-075B069C7641	41911	doxorubicin	[Not Available]	Chemotherapy	605	NO	694	Stable Disease	[Not Available]	[Not Available]	[Not Available]	[Not Available]	[Not Available]	[Not Available]	[Not Available]	[Not Applicable]	[Not Available]	[Not Available]	[Not Available]	[Not Available]	[Not Available]	[Not Available]	[Not Available]	NO
A5BE4E42-CB6C-4E67-8547-45DBD058BB95	TCGA-OU-A5PI	TCGA-OU-A5PI-D65717	C580D8A5-B9BA-408B-B48C-475EC3B9B71D	41911	carboplatin	[Not Available]	Chemotherapy	725	NO	817	Stable Disease	[Not Available]	[Not Available]	[Not Available]	[Not Available]	[Not Available]	[Not Available]	[Not Available]	[Not Applicable]	[Not Available]	[Not Available]	[Not Available]	[Not Available]	[Not Available]	[Not Available]	[Not Available]	NO
A5BE4E42-CB6C-4E67-8547-45DBD058BB95	TCGA-OU-A5PI	TCGA-OU-A5PI-D65718	DB218B3E-4521-4679-B6EC-6007015DDCB0	41911	streptozocin	[Not Available]	Chemotherapy	725	NO	817	Stable Disease	[Not Available]	[Not Available]	[Not Available]	[Not Available]	[Not Available]	[Not Available]	[Not Available]	[Not Applicable]	[Not Available]	[Not Available]	[Not Available]	[Not Available]	[Not Available]	[Not Available]	[Not Available]	NO
A5BE4E42-CB6C-4E67-8547-45DBD058BB95	TCGA-OU-A5PI	TCGA-OU-A5PI-D65719	63516D8E-6FD0-445D-87C1-A324961E772C	41911	Avastin	[Not Available]	Immunotherapy	725	NO	878	Stable Disease	[Not Available]	[Not Available]	[Not Available]	[Not Available]	[Not Available]	[Not Available]	[Not Available]	[Not Applicable]	[Not Available]	[Not Available]	[Not Available]	[Not Available]	[Not Available]	[Not Available]	[Not Available]	NO
9A8EA017-0152-48B2-ACCB-D040DEB1C6B6	TCGA-PK-A5HB	TCGA-PK-A5HB-D48538	08ACEB09-01AC-4EF4-843B-3E342FA5AFF7	41533	Sorafenib	[Not Available]	Targeted Molecular therapy	968	NO	1029	Clinical Progressive Disease	[Not Available]	[Not Available]	[Not Available]	[Not Available]	[Not Available]	[Not Available]	[Not Available]	[Not Applicable]	[Not Available]	[Not Available]	[Not Available]	[Not Available]	[Not Available]	[Not Available]	[Not Available]	YES

## Sheet: BLCA
bcr_patient_uuid	bcr_patient_barcode	bcr_drug_barcode	bcr_drug_uuid	form_completion_date	pharmaceutical_therapy_drug_name	clinical_trial_drug_classification	pharmaceutical_therapy_type	pharmaceutical_tx_started_days_to	pharmaceutical_tx_ongoing_indicator	pharmaceutical_tx_ended_days_to	treatment_best_response	days_to_stem_cell_transplantation	pharm_regimen	pharm_regimen_other	pharma_adjuvant_cycles_count	pharma_type_other	pharmaceutical_tx_dose_units	pharmaceutical_tx_total_dose_units	prescribed_dose	regimen_number	route_of_administration	stem_cell_transplantation	stem_cell_transplantation_type	therapy_regimen	therapy_regimen_other	total_dose	tx_on_clinical_trial
bcr_patient_uuid	bcr_patient_barcode	bcr_drug_barcode	bcr_drug_uuid	form_completion_date	drug_name	clinical_trail_drug_classification	therapy_type	days_to_drug_therapy_start	therapy_ongoing	days_to_drug_therapy_end	measure_of_response	days_to_stem_cell_transplantation	pharm_regimen	pharm_regimen_other	number_cycles	therapy_type_notes	prescribed_dose_units	total_dose_units	prescribed_dose	regimen_number	route_of_administration	stem_cell_transplantation	stem_cell_transplantation_type	regimen_indication	regimen_indication_notes	total_dose	tx_on_clinical_trial
CDE_ID:	CDE_ID:2003301	CDE_ID:	CDE_ID:	CDE_ID:	CDE_ID:2975232	CDE_ID:3378323	CDE_ID:2793530	CDE_ID:3392465	CDE_ID:3103479	CDE_ID:3392470	CDE_ID:2857291	CDE_ID:3414613	CDE_ID:3366758	CDE_ID:3366930	CDE_ID:62590	CDE_ID:2001762	CDE_ID:3065815	CDE_ID:3088785	CDE_ID:2184728	CDE_ID:2744948	CDE_ID:2003586	CDE_ID:3090688	CDE_ID:2730901	CDE_ID:2793511	CDE_ID:2793516	CDE_ID:1515	CDE_ID:3925111
a6003b1c-56a9-430a-a5e2-b70af3f81bdb	TCGA-BL-A0C8	TCGA-BL-A0C8-D32669	CC079D30-D4A6-473B-ACCC-8167CA062261	41073	BCG	[Not Available]	Immunotherapy	680	NO	722	Clinical Progressive Disease	[Not Available]	[Not Available]	[Not Available]	[Not Available]	[Not Available]	[Not Available]	[Not Available]	[Not Available]	[Not Available]	[Not Available]	[Not Available]	[Not Available]	[Not Available]	[Not Applicable]	[Not Available]	NO
ebedab7c-dd7c-448e-8324-78c86f13be8b	TCGA-BT-A20N	TCGA-BT-A20N-D44812	C5775BA6-A233-4EF4-B47C-9C5F34A26DB8	41452	Gemzar	[Not Available]	Chemotherapy	198	NO	323	Clinical Progressive Disease	[Not Available]	[Not Available]	[Not Available]	[Not Available]	[Not Available]	[Not Available]	[Not Available]	[Not Available]	[Not Available]	[Not Available]	[Not Available]	[Not Available]	[Not Available]	[Not Applicable]	[Not Available]	NO
ebedab7c-dd7c-448e-8324-78c86f13be8b	TCGA-BT-A20N	TCGA-BT-A20N-D44813	E926C775-6E1D-4366-9740-C919D36E9569	41452	Cisplatin	[Not Available]	Chemotherapy	198	NO	323	Clinical Progressive Disease	[Not Available]	[Not Available]	[Not Available]	[Not Available]	[Not Available]	[Not Available]	[Not Available]	[Not Available]	[Not Available]	[Not Available]	[Not Available]	[Not Available]	[Not Available]	[Not Applicable]	[Not Available]	NO
096b4f32-10c1-4737-a0dd-cae04c54ee33	TCGA-BT-A20T	TCGA-BT-A20T-D44883	EEE09E52-7699-40FF-BC3C-8F4EC8F10A18	41453	Gemzar	[Not Available]	Chemotherapy	161	NO	263	Clinical Progressive Disease	[Not Available]	[Not Available]	[Not Available]	[Not Available]	[Not Available]	[Not Available]	[Not Available]	[Not Available]	[Not Available]	[Not Available]	[Not Available]	[Not Available]	[Not Available]	[Not Applicable]	[Not Available]	NO
096b4f32-10c1-4737-a0dd-cae04c54ee33	TCGA-BT-A20T	TCGA-BT-A20T-D44884	599CD847-F63B-4AD2-84AC-4699DF3DFF12	41453	Cisplatin	[Not Available]	Chemotherapy	161	NO	263	Clinical Progressive Disease	[Not Available]	[Not Available]	[Not Available]	[Not Available]	[Not Available]	[Not Available]	[Not Available]	[Not Available]	[Not Available]	[Not Available]	[Not Available]	[Not Available]	[Not Available]	[Not Applicable]	[Not Available]	NO
096b4f32-10c1-4737-a0dd-cae04c54ee33	TCGA-BT-A20T	TCGA-BT-A20T-D44886	5D769B70-A269-485A-9A41-53B85FCE51AA	41453	Docetaxel	[Not Available]	Chemotherapy	263	NO	331	Clinical Progressive Disease	[Not Available]	[Not Available]	[Not Available]	[Not Available]	[Not Available]	[Not Available]	[Not Available]	[Not Available]	[Not Available]	[Not Available]	[Not Available]	[Not Available]	[Not Available]	[Not Applicable]	[Not Available]	YES
096b4f32-10c1-4737-a0dd-cae04c54ee33	TCGA-BT-A20T	TCGA-BT-A20T-D44887	52004135-3449-4E37-8287-0752F6BFCD19	41453	Oxaliplatin	[Not Available]	Chemotherapy	263	NO	331	Clinical Progressive Disease	[Not Available]	[Not Available]	[Not Available]	[Not Available]	[Not Available]	[Not Available]	[Not Available]	[Not Available]	[Not Available]	[Not Available]	[Not Available]	[Not Available]	[Not Available]	[Not Applicable]	[Not Available]	YES
096b4f32-10c1-4737-a0dd-cae04c54ee33	TCGA-BT-A20T	TCGA-BT-A20T-D44888	F569D2B8-AD43-41C9-8529-8435E1DE6319	41453	Cisplatin	[Not Available]	Chemotherapy	419	NO	419	Clinical Progressive Disease	[Not Available]	[Not Available]	[Not Available]	[Not Available]	[Not Available]	[Not Available]	[Not Available]	[Not Available]	[Not Available]	[Not Available]	[Not Available]	[Not Available]	[Not Available]	[Not Applicable]	[Not Available]	NO
797A71EE-372D-41E5-AEEE-5AB3C4661110	TCGA-BT-A2LA	TCGA-BT-A2LA-D44911	6350D8AB-C844-4B7E-B614-DFD7938FB5BD	41453	Carboplatin	[Not Available]	Chemotherapy	96	NO	180	Complete Response	[Not Available]	[Not Available]	[Not Available]	[Not Available]	[Not Available]	[Not Available]	[Not Available]	[Not Available]	[Not Available]	[Not Available]	[Not Available]	[Not Available]	[Not Available]	[Not Applicable]	[Not Available]	NO
797A71EE-372D-41E5-AEEE-5AB3C4661110	TCGA-BT-A2LA	TCGA-BT-A2LA-D44913	904A4772-EDFC-4C8F-9DF8-14144E3C0AEF	41453	Etopside	[Not Available]	Chemotherapy	96	NO	180	Complete Response	[Not Available]	[Not Available]	[Not Available]	[Not Available]	[Not Available]	[Not Available]	[Not Available]	[Not Available]	[Not Available]	[Not Available]	[Not Available]	[Not Available]	[Not Available]	[Not Applicable]	[Not Available]	NO
9DD97821-7AFD-4982-8B1D-F14F845B79F7	TCGA-BT-A2LD	TCGA-BT-A2LD-D44921	128128BF-D5E7-48BF-ACDB-05921F2B99F5	41453	Carboplatin	[Not Available]	Chemotherapy	458	NO	611	Clinical Progressive Disease	[Not Available]	[Not Available]	[Not Available]	[Not Available]	[Not Available]	[Not Available]	[Not Available]	[Not Available]	[Not Available]	[Not Available]	[Not Available]	[Not Available]	[Not Available]	[Not Applicable]	[Not Available]	NO
9DD97821-7AFD-4982-8B1D-F14F845B79F7	TCGA-BT-A2LD	TCGA-BT-A2LD-D44922	60CACF08-2DDB-465D-B22A-E4A02C79D163	41453	Taxol	[Not Available]	Chemotherapy	458	NO	611	Clinical Progressive Disease	[Not Available]	[Not Available]	[Not Available]	[Not Available]	[Not Available]	[Not Available]	[Not Available]	[Not Available]	[Not Available]	[Not Available]	[Not Available]	[Not Available]	[Not Available]	[Not Applicable]	[Not Available]	NO
CB664EEF-BE6F-44EF-AA90-6F6DA0E6440A	TCGA-BT-A3PJ	TCGA-BT-A3PJ-D33531	192556C7-0786-4847-9F1B-1CAE6B5215FA	41095	Gemcitabine	[Not Available]	Chemotherapy	68	YES	[Not Available]	[Not Applicable]	[Not Available]	[Not Available]	[Not Available]	[Not Available]	[Not Available]	[Not Available]	[Not Available]	[Not Available]	[Not Available]	[Not Available]	[Not Available]	[Not Available]	[Not Available]	[Not Applicable]	[Not Available]	NO
CB664EEF-BE6F-44EF-AA90-6F6DA0E6440A	TCGA-BT-A3PJ	TCGA-BT-A3PJ-D33532	6FBBE6F8-44E3-44DA-870D-E15A2A41C7ED	41095	Carboplatin	[Not Available]	Chemotherapy	68	YES	[Not Available]	[Not Applicable]	[Not Available]	[Not Available]	[Not Available]	[Not Available]	[Not Available]	[Not Available]	[Not Available]	[Not Available]	[Not Available]	[Not Available]	[Not Available]	[Not Available]	[Not Available]	[Not Applicable]	[Not Available]	NO
DB84C62D-6904-4EA8-8E51-1262B8D6FF90	TCGA-BT-A42B	TCGA-BT-A42B-D42491	ADBAB3EA-7337-4FCC-9C10-E070E6D14AD5	41386	Gemcitabine	[Not Available]	Chemotherapy	121	NO	190	Clinical Progressive Disease	[Not Available]	[Not Available]	[Not Available]	[Not Available]	[Not Available]	[Not Available]	[Not Available]	[Not Available]	[Not Available]	[Not Available]	[Not Available]	[Not Available]	[Not Available]	[Not Applicable]	[Not Available]	NO
DB84C62D-6904-4EA8-8E51-1262B8D6FF90	TCGA-BT-A42B	TCGA-BT-A42B-D42492	66146DE1-BD24-4411-9D76-F0F510B98EA4	41386	Cisplatin	[Not Available]	Chemotherapy	121	NO	190	Clinical Progressive Disease	[Not Available]	[Not Available]	[Not Available]	[Not Available]	[Not Available]	[Not Available]	[Not Available]	[Not Available]	[Not Available]	[Not Available]	[Not Available]	[Not Available]	[Not Available]	[Not Applicable]	[Not Available]	NO
DB84C62D-6904-4EA8-8E51-1262B8D6FF90	TCGA-BT-A42B	TCGA-BT-A42B-D42493	4ADB46D8-DD6A-4ADB-B16E-54DCC4EE1E69	41386	Taxol	[Not Available]	Chemotherapy	121	NO	190	Clinical Progressive Disease	[Not Available]	[Not Available]	[Not Available]	[Not Available]	[Not Available]	[Not Available]	[Not Available]	[Not Available]	[Not Available]	[Not Available]	[Not Available]	[Not Available]	[Not Available]	[Not Applicable]	[Not Available]	NO
8D434CFB-2414-4D93-BF79-7B957BF040DB	TCGA-BT-A42E	TCGA-BT-A42E-D50187	59D232F6-DB12-4D16-A157-F88EAB0E2A32	41564	Carboplatin	[Not Available]	Chemotherapy	49	NO	154	Complete Response	[Not Available]	[Not Available]	[Not Available]	[Not Available]	[Not Available]	[Not Available]	[Not Available]	[Not Available]	[Not Available]	[Not Available]	[Not Available]	[Not Available]	[Not Available]	[Not Applicable]	[Not Available]	NO
8D434CFB-2414-4D93-BF79-7B957BF040DB	TCGA-BT-A42E	TCGA-BT-A42E-D50188	35D81628-2375-4EC8-A6B1-A1AA79E07684	41564	Gemzar	[Not Available]	Chemotherapy	49	NO	154	Complete Response	[Not Available]	[Not Available]	[Not Available]	[Not Available]	[Not Available]	[Not Available]	[Not Available]	[Not Available]	[Not Available]	[Not Available]	[Not Available]	[Not Available]	[Not Available]	[Not Applicable]	[Not Available]	NO
05935f1d-77c2-46ca-b87a-7a84bce38afd	TCGA-C4-A0EZ	TCGA-C4-A0EZ-D35652	FA22598C-5DC7-4CC0-B126-B61778FC9C6A	41248	Carboplatin	[Not Available]	Chemotherapy	123	NO	212	Partial Response	[Not Available]	[Not Available]	[Not Available]	[Not Available]	[Not Available]	[Not Available]	[Not Available]	[Not Available]	[Not Available]	[Not Available]	[Not Available]	[Not Available]	[Not Available]	[Not Applicable]	[Not Available]	NO
05935f1d-77c2-46ca-b87a-7a84bce38afd	TCGA-C4-A0EZ	TCGA-C4-A0EZ-D35654	4F972928-7DC0-4105-9EDB-736DE4C98E58	41248	Etoposide	[Not Available]	Chemotherapy	123	NO	212	Partial Response	[Not Available]	[Not Available]	[Not Available]	[Not Available]	[Not Available]	[Not Available]	[Not Available]	[Not Available]	[Not Available]	[Not Available]	[Not Available]	[Not Available]	[Not Available]	[Not Applicable]	[Not Available]	NO
05935f1d-77c2-46ca-b87a-7a84bce38afd	TCGA-C4-A0EZ	TCGA-C4-A0EZ-D35655	0FD0C954-A1F7-4E90-9E6C-E8BF11419D64	41248	Doxorubicin	[Not Available]	Chemotherapy	243	NO	243	Partial Response	[Not Available]	[Not Available]	[Not Available]	[Not Available]	[Not Available]	[Not Available]	[Not Available]	[Not Available]	[Not Available]	[Not Available]	[Not Available]	[Not Available]	[Not Available]	[Not Applicable]	[Not Available]	NO
D2DF20D4-6704-41E6-B33D-616225BD737C	TCGA-CF-A47S	TCGA-CF-A47S-D58097	1FD4DDD8-1A40-41E2-8205-C2D3D867EA24	41729	Bacillus Calmette-Guerin (BCG)	[Not Available]	Immunotherapy	109	NO	317	Complete Response	[Not Available]	[Not Available]	[Not Available]	[Not Available]	[Not Available]	[Not Available]	[Not Available]	[Not Available]	[Not Available]	[Not Available]	[Not Available]	[Not Available]	[Not Available]	[Not Applicable]	[Not Available]	NO
D2DF20D4-6704-41E6-B33D-616225BD737C	TCGA-CF-A47S	TCGA-CF-A47S-D58099	A24892D9-7521-435D-BD2F-26048C87B600	41729	Doxobubicin	[Not Available]	Chemotherapy	109	NO	324	Complete Response	[Not Available]	[Not Available]	[Not Available]	[Not Available]	[Not Available]	[Not Available]	[Not Available]	[Not Available]	[Not Available]	[Not Available]	[Not Available]	[Not Available]	[Not Available]	[Not Applicable]	[Not Available]	NO
0DB0F02F-94F5-492F-8840-5254792F6879	TCGA-CF-A47T	TCGA-CF-A47T-D58104	ABE51B78-4B56-45F8-8215-649E93F7FC88	41729	Carboplatin	[Not Available]	Chemotherapy	127	NO	149	Clinical Progressive Disease	[Not Available]	[Not Available]	[Not Available]	[Not Available]	[Not Available]	[Not Available]	[Not Available]	[Not Available]	[Not Available]	[Not Available]	[Not Available]	[Not Available]	[Not Available]	[Not Applicable]	[Not Available]	NO
0DB0F02F-94F5-492F-8840-5254792F6879	TCGA-CF-A47T	TCGA-CF-A47T-D58105	9DE2F76A-A905-4792-8303-AB37F3EE90AB	41729	5FU	[Not Available]	Chemotherapy	127	NO	149	Clinical Progressive Disease	[Not Available]	[Not Available]	[Not Available]	[Not Available]	[Not Available]	[Not Available]	[Not Available]	[Not Available]	[Not Available]	[Not Available]	[Not Available]	[Not Available]	[Not Available]	[Not Applicable]	[Not Available]	NO
087A7F70-2FA8-4A16-B130-4DF10A70C662	TCGA-CU-A3YL	TCGA-CU-A3YL-D35300	1A2FAC2C-0FAC-4B89-B634-1FC9392C9FFF	41176	Gemcitabine	[Not Available]	Chemotherapy	155	NO	224	Complete Response	[Not Available]	[Not Available]	[Not Available]	[Not Available]	[Not Available]	[Not Available]	[Not Available]	[Not Available]	[Not Available]	[Not Available]	[Not Available]	[Not Available]	[Not Available]	[Not Applicable]	[Not Available]	NO
087A7F70-2FA8-4A16-B130-4DF10A70C662	TCGA-CU-A3YL	TCGA-CU-A3YL-D35301	9EE4E1B8-45DB-43B7-BE7B-42EE9CF40FD7	41176	Cisplatin	[Not Available]	Chemotherapy	155	NO	224	Complete Response	[Not Available]	[Not Available]	[Not Available]	[Not Available]	[Not Available]	[Not Available]	[Not Available]	[Not Available]	[Not Available]	[Not Available]	[Not Available]	[Not Available]	[Not Available]	[Not Applicable]	[Not Available]	NO
3ed614e7-f356-4d87-985b-d3bbbae3bb40	TCGA-DK-A1A7	TCGA-DK-A1A7-D21686	ECA9F2E1-28D8-42C3-8F24-30AAB28F9E35	40954	Gemcitabine	[Not Available]	Chemotherapy	133	NO	246	[Not Available]	[Not Available]	[Not Available]	[Not Available]	6	[Not Available]	mg/m2	mg	1000	1st Line	IV	[Not Available]	[Not Available]	PROGRESSION	[Not Applicable]	1300	[Not Available]
3ed614e7-f356-4d87-985b-d3bbbae3bb40	TCGA-DK-A1A7	TCGA-DK-A1A7-D72496	CEC69360-02B7-4FDE-9BCB-E92657C2E258	42193	Cisplatin	[Not Available]	Chemotherapy	133	NO	246	Stable Disease	[Not Available]	[Not Available]	[Not Available]	[Not Available]	[Not Available]	[Not Available]	[Not Available]	[Not Available]	[Not Available]	[Not Available]	[Not Available]	[Not Available]	[Not Available]	[Not Applicable]	[Not Available]	NO
56d8a1b8-1268-4362-a7f1-77b76fbf1b59	TCGA-DK-A1AA	TCGA-DK-A1AA-D21689	D2751EF3-82D8-4D53-B419-0CEABE075099	40954	[Not Available]	[Not Available]	Chemotherapy	92	NO	153	[Not Available]	[Not Available]	[Not Available]	[Not Available]	[Not Available]	[Not Available]	[Not Available]	[Not Available]	[Not Available]	Adjuvant (1st line)	IV	[Not Available]	[Not Available]	ADJUVANT	[Not Applicable]	[Not Available]	[Not Available]
f027d254-ec01-4882-a8a7-964ae90b7d49	TCGA-DK-A1AB	TCGA-DK-A1AB-D21694	007C4BCC-890D-4D72-8668-29EEC0F26562	40954	[Not Available]	[Not Available]	[Not Available]	[Not Available]	NO	[Not Available]	[Not Available]	[Not Available]	[Not Available]	[Not Available]	[Not Available]	[Not Available]	[Not Available]	[Not Available]	[Not Available]	1st Line	[Not Available]	[Not Available]	[Not Available]	PROGRESSION	[Not Applicable]	[Not Available]	[Not Available]
36c14e9d-1863-4c55-bbbb-f8c9dd418932	TCGA-DK-A1AC	TCGA-DK-A1AC-D21697	D994614A-7BF2-48F5-BE7B-8AE9703EE379	40954	Gemcitabine	[Not Available]	Chemotherapy	168	NO	242	[Not Available]	[Not Available]	[Not Available]	[Not Available]	4	[Not Available]	mg/m2	mg	1000	Adjuvant (1st Line)	IV	[Not Available]	[Not Available]	ADJUVANT	[Not Applicable]	129	[Not Available]
36c14e9d-1863-4c55-bbbb-f8c9dd418932	TCGA-DK-A1AC	TCGA-DK-A1AC-D72501	7F75EDEF-455B-4FBE-A354-E37576C31487	42193	Cisplatin	[Not Available]	Chemotherapy	178	NO	242	Complete Response	[Not Available]	[Not Available]	[Not Available]	[Not Available]	[Not Available]	[Not Available]	[Not Available]	[Not Available]	[Not Available]	[Not Available]	[Not Available]	[Not Available]	[Not Available]	[Not Applicable]	[Not Available]	NO
88a521ce-a5e9-4c6f-83d4-ec36a62fedb6	TCGA-DK-A1AD	TCGA-DK-A1AD-D21700	AB32B388-EBBB-4200-B5BC-4997074C81AD	40955	[Not Available]	[Not Available]	[Not Available]	[Not Available]	[Not Available]	[Not Available]	[Not Available]	[Not Available]	[Not Available]	[Not Available]	[Not Available]	[Not Available]	[Not Available]	[Not Available]	[Not Available]	[Not Available]	[Not Available]	[Not Available]	[Not Available]	[Not Available]	[Not Applicable]	[Not Available]	[Not Available]
f3104468-bf17-434b-8a7e-bc3b253121ea	TCGA-DK-A1AF	TCGA-DK-A1AF-D21714	089CDB21-384B-4FB8-8630-778116D6187E	40956	Gemcitabine	[Not Available]	Chemotherapy	289	NO	435	[Not Available]	[Not Available]	[Not Available]	[Not Available]	6	[Not Available]	mg/m2	mg	800	1st Line	IV	[Not Available]	[Not Available]	PROGRESSION	[Not Applicable]	1200	[Not Available]
E44F60EC-66C4-45A2-A003-0A1FAF1D6E03	TCGA-DK-A3IQ	TCGA-DK-A3IQ-D38697	FEA4C980-10BE-4F36-9C2F-B2F48E8007A1	41263	Carboplatin	[Not Available]	Chemotherapy	277	NO	319	[Not Available]	[Not Available]	[Not Available]	[Not Available]	[Not Available]	[Not Available]	[Not Available]	[Not Available]	[Not Available]	[Not Available]	[Not Available]	[Not Available]	[Not Available]	[Not Available]	[Not Applicable]	[Not Available]	NO
E44F60EC-66C4-45A2-A003-0A1FAF1D6E03	TCGA-DK-A3IQ	TCGA-DK-A3IQ-D38698	70BA0E25-A08A-4327-B527-C11B8935C88E	41263	Gemcitabine	[Not Available]	Chemotherapy	277	NO	417	Stable Disease	[Not Available]	[Not Available]	[Not Available]	[Not Available]	[Not Available]	[Not Available]	[Not Available]	[Not Available]	[Not Available]	[Not Available]	[Not Available]	[Not Available]	[Not Available]	[Not Applicable]	[Not Available]	NO
F093F043-EFD4-4CBA-A87F-8CBB5C1ACD9E	TCGA-DK-A3IU	TCGA-DK-A3IU-D38824	A2C1A3DA-2C5B-4B1E-BE7A-4FED623CA6EF	41270	Gemcitabine	[Not Available]	Chemotherapy	521	NO	578	Clinical Progressive Disease	[Not Available]	[Not Available]	[Not Available]	[Not Available]	[Not Available]	[Not Available]	[Not Available]	[Not Available]	[Not Available]	[Not Available]	[Not Available]	[Not Available]	[Not Available]	[Not Applicable]	[Not Available]	NO
F093F043-EFD4-4CBA-A87F-8CBB5C1ACD9E	TCGA-DK-A3IU	TCGA-DK-A3IU-D38825	F3DF4793-4AAA-4016-B88B-2797DCD1D9E0	41270	Carboplatin	[Not Available]	Chemotherapy	521	NO	578	Clinical Progressive Disease	[Not Available]	[Not Available]	[Not Available]	[Not Available]	[Not Available]	[Not Available]	[Not Available]	[Not Available]	[Not Available]	[Not Available]	[Not Available]	[Not Available]	[Not Available]	[Not Applicable]	[Not Available]	NO
F953DC5D-58BF-4936-B9FE-74B45E8C00E5	TCGA-DK-A3IV	TCGA-DK-A3IV-D38827	162913EB-0994-47A2-950C-E51ABFA2A821	41270	Gemcitabine	[Not Available]	Chemotherapy	17	NO	87	Clinical Progressive Disease	[Not Available]	[Not Available]	[Not Available]	[Not Available]	[Not Available]	[Not Available]	[Not Available]	[Not Available]	[Not Available]	[Not Available]	[Not Available]	[Not Available]	[Not Available]	[Not Applicable]	[Not Available]	NO
F953DC5D-58BF-4936-B9FE-74B45E8C00E5	TCGA-DK-A3IV	TCGA-DK-A3IV-D38830	8CEBEFB0-57C2-4AB5-9120-A03E28ECB960	41270	Cisplatin	[Not Available]	Chemotherapy	17	NO	87	Clinical Progressive Disease	[Not Available]	[Not Available]	[Not Available]	[Not Available]	[Not Available]	[Not Available]	[Not Available]	[Not Available]	[Not Available]	[Not Available]	[Not Available]	[Not Available]	[Not Available]	[Not Applicable]	[Not Available]	NO
2AB0FB7B-AD2A-403D-9411-712974CCD878	TCGA-DK-A3WW	TCGA-DK-A3WW-D34647	17EF6B8E-713B-4960-9A68-37EC4E2F805F	41152	Gemcitabine	[Not Available]	Chemotherapy	127	NO	177	Complete Response	[Not Available]	[Not Available]	[Not Available]	[Not Available]	[Not Available]	[Not Available]	[Not Available]	[Not Available]	[Not Available]	[Not Available]	[Not Available]	[Not Available]	[Not Available]	[Not Applicable]	[Not Available]	NO
2AB0FB7B-AD2A-403D-9411-712974CCD878	TCGA-DK-A3WW	TCGA-DK-A3WW-D38323	04EE4CC6-7324-447B-97B9-BE0341C3CD10	41256	Cisplatin	[Not Available]	Chemotherapy	127	NO	177	Complete Response	[Not Available]	[Not Available]	[Not Available]	[Not Available]	[Not Available]	[Not Available]	[Not Available]	[Not Available]	[Not Available]	[Not Available]	[Not Available]	[Not Available]	[Not Available]	[Not Applicable]	[Not Available]	NO
2AB0FB7B-AD2A-403D-9411-712974CCD878	TCGA-DK-A3WW	TCGA-DK-A3WW-D38324	2BCC635F-253A-462B-BDCA-6F75B56D0570	41256	Taxol	[Not Available]	Chemotherapy	127	NO	177	Complete Response	[Not Available]	[Not Available]	[Not Available]	[Not Available]	[Not Available]	[Not Available]	[Not Available]	[Not Available]	[Not Available]	[Not Available]	[Not Available]	[Not Available]	[Not Available]	[Not Applicable]	[Not Available]	NO
D63C186D-ADD6-492E-8250-E83F46D39D00	TCGA-DK-A3WX	TCGA-DK-A3WX-D34802	1523238C-7C7D-44D4-951C-3859EA70468B	41152	Gemcitabine	[Not Available]	Chemotherapy	56	NO	105	Clinical Progressive Disease	[Not Available]	[Not Available]	[Not Available]	[Not Available]	[Not Available]	[Not Available]	[Not Available]	[Not Available]	[Not Available]	[Not Available]	[Not Available]	[Not Available]	[Not Available]	[Not Applicable]	[Not Available]	NO
D63C186D-ADD6-492E-8250-E83F46D39D00	TCGA-DK-A3WX	TCGA-DK-A3WX-D38325	9AE90D8B-3ABA-415D-8B04-3BAF436820EC	41256	Cisplatin	[Not Available]	Chemotherapy	56	NO	105	Clinical Progressive Disease	[Not Available]	[Not Available]	[Not Available]	[Not Available]	[Not Available]	[Not Available]	[Not Available]	[Not Available]	[Not Available]	[Not Available]	[Not Available]	[Not Available]	[Not Available]	[Not Applicable]	[Not Available]	NO
9BB5D187-033E-4E86-A76E-E1A6D20488F7	TCGA-DK-A3WY	TCGA-DK-A3WY-D34806	4A25FB83-75D4-4072-AC09-BE58DBE9C8B2	41152	Gemcitabine	[Not Available]	Chemotherapy	132	NO	235	Complete Response	[Not Available]	[Not Available]	[Not Available]	[Not Available]	[Not Available]	[Not Available]	[Not Available]	[Not Available]	[Not Available]	[Not Available]	[Not Available]	[Not Available]	[Not Available]	[Not Applicable]	[Not Available]	YES
9BB5D187-033E-4E86-A76E-E1A6D20488F7	TCGA-DK-A3WY	TCGA-DK-A3WY-D38326	45EF4B2A-939C-4B66-8309-CCC91660646F	41256	Cisplatin	[Not Available]	Chemotherapy	132	NO	235	Complete Response	[Not Available]	[Not Available]	[Not Available]	[Not Available]	[Not Available]	[Not Available]	[Not Available]	[Not Available]	[Not Available]	[Not Available]	[Not Available]	[Not Available]	[Not Available]	[Not Applicable]	[Not Available]	YES
10C825D7-4E21-43E7-AC95-DDA75FBDAF74	TCGA-DK-A6B2	TCGA-DK-A6B2-D48134	8854B40F-584C-4AF1-8488-7BA61B50B207	41523	Gemcitabine	[Not Available]	Chemotherapy	283	NO	370	Clinical Progressive Disease	[Not Available]	[Not Available]	[Not Available]	[Not Available]	[Not Available]	[Not Available]	[Not Available]	[Not Available]	[Not Available]	[Not Available]	[Not Available]	[Not Available]	[Not Available]	[Not Applicable]	[Not Available]	NO
D5E8D936-40AE-4FD3-B40E-CAC54763D71F	TCGA-DK-A6B5	TCGA-DK-A6B5-D48137	3FFFF824-C57F-4100-B504-E0672D3D9F66	41523	Paclitaxel	[Not Available]	Chemotherapy	248	NO	348	Complete Response	[Not Available]	[Not Available]	[Not Available]	[Not Available]	[Not Available]	[Not Available]	[Not Available]	[Not Available]	[Not Available]	[Not Available]	[Not Available]	[Not Available]	[Not Available]	[Not Applicable]	[Not Available]	NO
D5E8D936-40AE-4FD3-B40E-CAC54763D71F	TCGA-DK-A6B5	TCGA-DK-A6B5-D48138	320A8318-5E26-41D8-963A-11D88542F86E	41523	Cisplatin	[Not Available]	Chemotherapy	248	NO	348	Complete Response	[Not Available]	[Not Available]	[Not Available]	[Not Available]	[Not Available]	[Not Available]	[Not Available]	[Not Available]	[Not Available]	[Not Available]	[Not Available]	[Not Available]	[Not Available]	[Not Applicable]	[Not Available]	NO
D5E8D936-40AE-4FD3-B40E-CAC54763D71F	TCGA-DK-A6B5	TCGA-DK-A6B5-D48139	E15A97F1-68D6-4A22-B69E-50AD72C91B7A	41523	Gemcitabine	[Not Available]	Chemotherapy	248	NO	348	Complete Response	[Not Available]	[Not Available]	[Not Available]	[Not Available]	[Not Available]	[Not Available]	[Not Available]	[Not Available]	[Not Available]	[Not Available]	[Not Available]	[Not Available]	[Not Available]	[Not Applicable]	[Not Available]	NO
AB6580E4-5DE9-4361-B06A-1D20E5571890	TCGA-DK-A6B6	TCGA-DK-A6B6-D48127	2041396B-C7B9-41E9-A0AE-8535D21FC31F	41523	Gemcitabine	[Not Available]	Chemotherapy	43	NO	113	Complete Response	[Not Available]	[Not Available]	[Not Available]	[Not Available]	[Not Available]	[Not Available]	[Not Available]	[Not Available]	[Not Available]	[Not Available]	[Not Available]	[Not Available]	[Not Available]	[Not Applicable]	[Not Available]	NO
AB6580E4-5DE9-4361-B06A-1D20E5571890	TCGA-DK-A6B6	TCGA-DK-A6B6-D48128	E1F69D35-AE98-483D-88E3-1F82EFE74FBE	41523	Cisplatin	[Not Available]	Chemotherapy	43	NO	113	Complete Response	[Not Available]	[Not Available]	[Not Available]	[Not Available]	[Not Available]	[Not Available]	[Not Available]	[Not Available]	[Not Available]	[Not Available]	[Not Available]	[Not Available]	[Not Available]	[Not Applicable]	[Not Available]	NO
D8B07FDD-5580-4BCC-9619-B5E0C9F0AA3D	TCGA-DK-AA6M	TCGA-DK-AA6M-D69746	C63CB31F-1C6B-4766-B1FE-AF1DDC37383F	42020	Gemcitabine	[Not Available]	[Not Available]	735	NO	820	Partial Response	[Not Available]	[Not Available]	[Not Available]	[Not Available]	[Not Available]	[Not Available]	[Not Available]	[Not Available]	[Not Available]	[Not Available]	[Not Available]	[Not Available]	[Not Available]	[Not Applicable]	[Not Available]	YES
D8B07FDD-5580-4BCC-9619-B5E0C9F0AA3D	TCGA-DK-AA6M	TCGA-DK-AA6M-D69747	8A269839-4BD4-49AD-AEAB-2A02D841044E	42020	Cisplatin	[Not Available]	Chemotherapy	735	NO	820	Partial Response	[Not Available]	[Not Available]	[Not Available]	[Not Available]	[Not Available]	[Not Available]	[Not Available]	[Not Available]	[Not Available]	[Not Available]	[Not Available]	[Not Available]	[Not Available]	[Not Applicable]	[Not Available]	YES
4E702CA1-C0E0-4B9C-B9C7-7D7946818561	TCGA-DK-AA6P	TCGA-DK-AA6P-D69748	867D9644-9CE9-4F05-BCBE-E98A5C12FF94	42020	Gemcitabine	[Not Available]	[Not Available]	27	NO	99	Stable Disease	[Not Available]	[Not Available]	[Not Available]	[Not Available]	[Not Available]	[Not Available]	[Not Available]	[Not Available]	[Not Available]	[Not Available]	[Not Available]	[Not Available]	[Not Available]	[Not Applicable]	[Not Available]	YES
4E702CA1-C0E0-4B9C-B9C7-7D7946818561	TCGA-DK-AA6P	TCGA-DK-AA6P-D69749	A2C44B1C-D97E-4BEE-B533-447B609EE994	42020	Cisplatin	[Not Available]	[Not Available]	27	NO	99	Stable Disease	[Not Available]	[Not Available]	[Not Available]	[Not Available]	[Not Available]	[Not Available]	[Not Available]	[Not Available]	[Not Available]	[Not Available]	[Not Available]	[Not Available]	[Not Available]	[Not Applicable]	[Not Available]	YES
5DB4B168-A6BA-482C-B067-2274EBA96AAD	TCGA-DK-AA6R	TCGA-DK-AA6R-D69751	AF28FF1A-7607-4AB9-9180-D0292F8ED1B4	42020	Gemcitabine	[Not Available]	Chemotherapy	125	NO	204	Stable Disease	[Not Available]	[Not Available]	[Not Available]	[Not Available]	[Not Available]	[Not Available]	[Not Available]	[Not Available]	[Not Available]	[Not Available]	[Not Available]	[Not Available]	[Not Available]	[Not Applicable]	[Not Available]	NO
5DB4B168-A6BA-482C-B067-2274EBA96AAD	TCGA-DK-AA6R	TCGA-DK-AA6R-D69752	C2AD34E8-BC09-455E-ADB8-C2AB3537251F	42020	Cisplatin	[Not Available]	Chemotherapy	125	NO	204	[Not Available]	[Not Available]	[Not Available]	[Not Available]	[Not Available]	[Not Available]	[Not Available]	[Not Available]	[Not Available]	[Not Available]	[Not Available]	[Not Available]	[Not Available]	[Not Available]	[Not Applicable]	[Not Available]	NO
45EEA556-E97B-4912-8AA9-7E5C709EB52B	TCGA-DK-AA6S	TCGA-DK-AA6S-D65595	7C12264A-4248-4E62-A2D8-8019A6B747EC	41907	Ifosfamide	[Not Available]	Chemotherapy	575	NO	710	Clinical Progressive Disease	[Not Available]	[Not Available]	[Not Available]	[Not Available]	[Not Available]	[Not Available]	[Not Available]	[Not Available]	[Not Available]	[Not Available]	[Not Available]	[Not Available]	[Not Available]	[Not Applicable]	[Not Available]	NO
45EEA556-E97B-4912-8AA9-7E5C709EB52B	TCGA-DK-AA6S	TCGA-DK-AA6S-D65596	4E8F6A0C-588C-4FCA-BA02-BCA414A7E257	41907	Cisplatin	[Not Available]	Chemotherapy	575	NO	710	Clinical Progressive Disease	[Not Available]	[Not Available]	[Not Available]	[Not Available]	[Not Available]	[Not Available]	[Not Available]	[Not Available]	[Not Available]	[Not Available]	[Not Available]	[Not Available]	[Not Available]	[Not Applicable]	[Not Available]	NO
45EEA556-E97B-4912-8AA9-7E5C709EB52B	TCGA-DK-AA6S	TCGA-DK-AA6S-D65597	E8070EE0-F024-4531-984D-F82E332BC4F7	41907	Paclitaxel	[Not Available]	Chemotherapy	575	NO	710	Clinical Progressive Disease	[Not Available]	[Not Available]	[Not Available]	[Not Available]	[Not Available]	[Not Available]	[Not Available]	[Not Available]	[Not Available]	[Not Available]	[Not Available]	[Not Available]	[Not Available]	[Not Applicable]	[Not Available]	NO
F9B55748-605A-4313-BB19-DCF5476590C2	TCGA-DK-AA6T	TCGA-DK-AA6T-D72250	E005F128-2354-4914-9820-1D7061766112	42124	Gemcitabine	[Not Available]	Chemotherapy	75	NO	110	Complete Response	[Not Available]	[Not Available]	[Not Available]	[Not Available]	[Not Available]	[Not Available]	[Not Available]	[Not Available]	[Not Available]	[Not Available]	[Not Available]	[Not Available]	[Not Available]	[Not Applicable]	[Not Available]	NO
F9B55748-605A-4313-BB19-DCF5476590C2	TCGA-DK-AA6T	TCGA-DK-AA6T-D72251	A8580409-6B13-4526-9A0B-34C7ADACFC66	42124	Carboplatin	[Not Available]	Chemotherapy	75	NO	110	Complete Response	[Not Available]	[Not Available]	[Not Available]	[Not Available]	[Not Available]	[Not Available]	[Not Available]	[Not Available]	[Not Available]	[Not Available]	[Not Available]	[Not Available]	[Not Available]	[Not Applicable]	[Not Available]	NO
104C8E20-1B29-4D77-9633-359A35BE48FB	TCGA-DK-AA6U	TCGA-DK-AA6U-D72252	8717DA3C-6BC0-43D9-8B8E-D0A7544AC307	42124	Gemcitabine	[Not Available]	Chemotherapy	13	NO	90	Complete Response	[Not Available]	[Not Available]	[Not Available]	[Not Available]	[Not Available]	[Not Available]	[Not Available]	[Not Available]	[Not Available]	[Not Available]	[Not Available]	[Not Available]	[Not Available]	[Not Applicable]	[Not Available]	NO
104C8E20-1B29-4D77-9633-359A35BE48FB	TCGA-DK-AA6U	TCGA-DK-AA6U-D72253	19EFBAA9-333A-453F-A8D4-0CC510265974	42124	Cisplatin	[Not Available]	Chemotherapy	13	NO	90	Complete Response	[Not Available]	[Not Available]	[Not Available]	[Not Available]	[Not Available]	[Not Available]	[Not Available]	[Not Available]	[Not Available]	[Not Available]	[Not Available]	[Not Available]	[Not Available]	[Not Applicable]	[Not Available]	NO
63FA8434-4A6F-4C32-9C5D-89DCC913900B	TCGA-DK-AA6W	TCGA-DK-AA6W-D72254	C345C9A2-9EBB-4498-BB87-A5062A9E9F5C	42124	Gemcitabine	[Not Available]	Chemotherapy	263	NO	328	Stable Disease	[Not Available]	[Not Available]	[Not Available]	[Not Available]	[Not Available]	[Not Available]	[Not Available]	[Not Available]	[Not Available]	[Not Available]	[Not Available]	[Not Available]	[Not Available]	[Not Applicable]	[Not Available]	NO
D37B0460-EFA4-4CF5-8082-F27FF2CF2F28	TCGA-DK-AA76	TCGA-DK-AA76-D61822	463A618D-7086-4797-BF6E-5AB843256101	41828	Cisplatin	[Not Available]	Chemotherapy	54	NO	114	Complete Response	[Not Available]	[Not Available]	[Not Available]	[Not Available]	[Not Available]	[Not Available]	[Not Available]	[Not Available]	[Not Available]	[Not Available]	[Not Available]	[Not Available]	[Not Available]	[Not Applicable]	[Not Available]	NO
D37B0460-EFA4-4CF5-8082-F27FF2CF2F28	TCGA-DK-AA76	TCGA-DK-AA76-D61823	1773BFBE-9FA4-44A0-AE26-0699056C9968	41828	Gemzar	[Not Available]	Chemotherapy	54	NO	114	Complete Response	[Not Available]	[Not Available]	[Not Available]	[Not Available]	[Not Available]	[Not Available]	[Not Available]	[Not Available]	[Not Available]	[Not Available]	[Not Available]	[Not Available]	[Not Available]	[Not Applicable]	[Not Available]	NO
EB4F8C76-08D9-4BA4-846E-969FDED63A87	TCGA-DK-AA77	TCGA-DK-AA77-D71291	F449613B-5D29-4046-B813-CE6027B59AC9	42087	Ipilimumab	[Not Available]	Immunotherapy	601	YES	[Not Available]	[Not Available]	[Not Available]	[Not Available]	[Not Available]	[Not Available]	[Not Available]	[Not Available]	[Not Available]	[Not Available]	[Not Available]	[Not Available]	[Not Available]	[Not Available]	[Not Available]	[Not Applicable]	[Not Available]	YES
EB4F8C76-08D9-4BA4-846E-969FDED63A87	TCGA-DK-AA77	TCGA-DK-AA77-D71292	14E324EF-5C14-41E0-9F64-8A2BB52381EA	42087	Nivolumab	[Not Available]	Immunotherapy	601	YES	[Not Available]	[Not Available]	[Not Available]	[Not Available]	[Not Available]	[Not Available]	[Not Available]	[Not Available]	[Not Available]	[Not Available]	[Not Available]	[Not Available]	[Not Available]	[Not Available]	[Not Available]	[Not Applicable]	[Not Available]	YES
4107AE6F-502C-4BDC-BF14-E4B3711CBA38	TCGA-E5-A2PC	TCGA-E5-A2PC-D33522	840DE356-7316-43B4-B965-CB0211FE9A6D	41095	Methotrexate	[Not Available]	Chemotherapy	[Not Available]	NO	139	Complete Response	[Not Available]	[Not Available]	[Not Available]	[Not Available]	[Not Available]	[Not Available]	[Not Available]	[Not Available]	[Not Available]	[Not Available]	[Not Available]	[Not Available]	[Not Available]	[Not Applicable]	[Not Available]	NO
4107AE6F-502C-4BDC-BF14-E4B3711CBA38	TCGA-E5-A2PC	TCGA-E5-A2PC-D33523	9D582767-B547-411F-9EC9-E5DD43A53072	41095	Vinblastine	[Not Available]	Chemotherapy	[Not Available]	NO	139	Complete Response	[Not Available]	[Not Available]	[Not Available]	[Not Available]	[Not Available]	[Not Available]	[Not Available]	[Not Available]	[Not Available]	[Not Available]	[Not Available]	[Not Available]	[Not Available]	[Not Applicable]	[Not Available]	NO
4107AE6F-502C-4BDC-BF14-E4B3711CBA38	TCGA-E5-A2PC	TCGA-E5-A2PC-D33524	EA31A3BA-4FDF-4FBB-8B12-C9B82B0E0FF1	41095	Adriamycin	[Not Available]	Chemotherapy	[Not Available]	NO	139	Complete Response	[Not Available]	[Not Available]	[Not Available]	[Not Available]	[Not Available]	[Not Available]	[Not Available]	[Not Available]	[Not Available]	[Not Available]	[Not Available]	[Not Available]	[Not Available]	[Not Applicable]	[Not Available]	NO
4107AE6F-502C-4BDC-BF14-E4B3711CBA38	TCGA-E5-A2PC	TCGA-E5-A2PC-D33525	66F39A5C-1A16-4EA3-B226-E2BFEC047106	41095	Cisplatin	[Not Available]	Chemotherapy	[Not Available]	NO	139	Complete Response	[Not Available]	[Not Available]	[Not Available]	[Not Available]	[Not Available]	[Not Available]	[Not Available]	[Not Available]	[Not Available]	[Not Available]	[Not Available]	[Not Available]	[Not Available]	[Not Applicable]	[Not Available]	NO
CA6403DD-3BD5-4023-8EA1-9957EC44DBA5	TCGA-E5-A4TZ	TCGA-E5-A4TZ-D46813	2FC8F65C-99BA-4FD3-9FA6-49BA92055C8D	41505	gemcitabine	[Not Available]	Chemotherapy	351	NO	421	[Unknown]	[Not Available]	[Not Available]	[Not Available]	[Not Available]	[Not Available]	[Not Available]	[Not Available]	[Not Available]	[Not Available]	[Not Available]	[Not Available]	[Not Available]	[Not Available]	[Not Applicable]	[Not Available]	NO
CA6403DD-3BD5-4023-8EA1-9957EC44DBA5	TCGA-E5-A4TZ	TCGA-E5-A4TZ-D46814	157CE8C2-724C-41E7-B869-6415366AFD56	41505	cisplatin	[Not Available]	Chemotherapy	351	NO	421	[Unknown]	[Not Available]	[Not Available]	[Not Available]	[Not Available]	[Not Available]	[Not Available]	[Not Available]	[Not Available]	[Not Available]	[Not Available]	[Not Available]	[Not Available]	[Not Available]	[Not Applicable]	[Not Available]	NO
1C28F311-E0B0-4292-B29A-C6757665A4A4	TCGA-E5-A4U1	TCGA-E5-A4U1-D46817	96872F51-C5BA-45CD-AC97-732ECD1C7882	41505	gemcitabine	[Not Available]	Chemotherapy	37	NO	114	[Unknown]	[Not Available]	[Not Available]	[Not Available]	[Not Available]	[Not Available]	[Not Available]	[Not Available]	[Not Available]	[Not Available]	[Not Available]	[Not Available]	[Not Available]	[Not Available]	[Not Applicable]	[Not Available]	NO
1C28F311-E0B0-4292-B29A-C6757665A4A4	TCGA-E5-A4U1	TCGA-E5-A4U1-D46818	EEFCDB26-883B-464B-B5C0-E853A005B064	41505	Cisplatin	[Not Available]	Chemotherapy	37	NO	114	[Unknown]	[Not Available]	[Not Available]	[Not Available]	[Not Available]	[Not Available]	[Not Available]	[Not Available]	[Not Available]	[Not Available]	[Not Available]	[Not Available]	[Not Available]	[Not Available]	[Not Applicable]	[Not Available]	NO
1C28F311-E0B0-4292-B29A-C6757665A4A4	TCGA-E5-A4U1	TCGA-E5-A4U1-D46819	2C0679DA-9E80-4991-AB18-1F46BE8D7043	41505	[Not Available]	Platinum-based antineoplastic	Chemotherapy	719	YES	[Not Available]	[Not Applicable]	[Not Available]	[Not Available]	[Not Available]	[Not Available]	[Not Available]	[Not Available]	[Not Available]	[Not Available]	[Not Available]	[Not Available]	[Not Available]	[Not Available]	[Not Available]	[Not Applicable]	[Not Available]	YES
1C28F311-E0B0-4292-B29A-C6757665A4A4	TCGA-E5-A4U1	TCGA-E5-A4U1-D64526	5E9878DB-0C67-4111-A7A8-3D3A8F797097	41886	docetaxel	[Not Available]	Chemotherapy	1024	NO	1150	Clinical Progressive Disease	[Not Available]	[Not Available]	[Not Available]	[Not Available]	[Not Available]	[Not Available]	[Not Available]	[Not Available]	[Not Available]	[Not Available]	[Not Available]	[Not Available]	[Not Available]	[Not Applicable]	[Not Available]	NO
899F8D52-4C3A-4371-90EB-1F106001EDDC	TCGA-FD-A3B4	TCGA-FD-A3B4-D35160	5940A678-2FBC-4D43-B89A-5C9260706B92	41171	gemcitabine	[Not Available]	Chemotherapy	115	NO	157	Complete Response	[Not Available]	[Not Available]	[Not Available]	[Not Available]	[Not Available]	[Not Available]	[Not Available]	[Not Available]	[Not Available]	[Not Available]	[Not Available]	[Not Available]	[Not Available]	[Not Applicable]	[Not Available]	NO
899F8D52-4C3A-4371-90EB-1F106001EDDC	TCGA-FD-A3B4	TCGA-FD-A3B4-D35162	335EC112-7819-4AB3-9F92-8D4B664F4300	41171	cisplatin	[Not Available]	Chemotherapy	115	NO	157	Complete Response	[Not Available]	[Not Available]	[Not Available]	[Not Available]	[Not Available]	[Not Available]	[Not Available]	[Not Available]	[Not Available]	[Not Available]	[Not Available]	[Not Available]	[Not Available]	[Not Applicable]	[Not Available]	NO
6D8D8169-0C1A-4CDB-BE6F-9761C981A369	TCGA-FD-A3SJ	TCGA-FD-A3SJ-D33690	D46CF87F-BDB1-4A91-A6E9-DC55A849448A	41106	carboplatin	[Not Available]	Chemotherapy	401	NO	436	Stable Disease	[Not Available]	[Not Available]	[Not Available]	[Not Available]	[Not Available]	[Not Available]	[Not Available]	[Not Available]	[Not Available]	[Not Available]	[Not Available]	[Not Available]	[Not Available]	[Not Applicable]	[Not Available]	NO
6D8D8169-0C1A-4CDB-BE6F-9761C981A369	TCGA-FD-A3SJ	TCGA-FD-A3SJ-D33689	2F5A329A-927F-442B-B822-D3FEE2DC0652	41106	gemcitabine	[Not Available]	Chemotherapy	315	NO	436	Stable Disease	[Not Available]	[Not Available]	[Not Available]	[Not Available]	[Not Available]	[Not Available]	[Not Available]	[Not Available]	[Not Available]	[Not Available]	[Not Available]	[Not Available]	[Not Available]	[Not Applicable]	[Not Available]	NO
6D8D8169-0C1A-4CDB-BE6F-9761C981A369	TCGA-FD-A3SJ	TCGA-FD-A3SJ-D33686	29A19447-3D72-4510-B886-5FCB0CA749EC	41106	vinblastine	[Not Available]	Chemotherapy	274	NO	275	Stable Disease	[Not Available]	[Not Available]	[Not Available]	[Not Available]	[Not Available]	[Not Available]	[Not Available]	[Not Available]	[Not Available]	[Not Available]	[Not Available]	[Not Available]	[Not Available]	[Not Applicable]	[Not Available]	NO
6D8D8169-0C1A-4CDB-BE6F-9761C981A369	TCGA-FD-A3SJ	TCGA-FD-A3SJ-D33687	18F7755E-C287-409E-9372-DD03A9A5645D	41106	Adriamycin	[Not Available]	Chemotherapy	274	NO	275	Stable Disease	[Not Available]	[Not Available]	[Not Available]	[Not Available]	[Not Available]	[Not Available]	[Not Available]	[Not Available]	[Not Available]	[Not Available]	[Not Available]	[Not Available]	[Not Available]	[Not Applicable]	[Not Available]	NO
6D8D8169-0C1A-4CDB-BE6F-9761C981A369	TCGA-FD-A3SJ	TCGA-FD-A3SJ-D33688	9F42AC4D-A0A4-4F5D-B058-D06F76527AD7	41106	cisplatin	[Not Available]	Chemotherapy	274	NO	380	Stable Disease	[Not Available]	[Not Available]	[Not Available]	[Not Available]	[Not Available]	[Not Available]	[Not Available]	[Not Available]	[Not Available]	[Not Available]	[Not Available]	[Not Available]	[Not Available]	[Not Applicable]	[Not Available]	NO
6D8D8169-0C1A-4CDB-BE6F-9761C981A369	TCGA-FD-A3SJ	TCGA-FD-A3SJ-D33648	10D93D30-4AC6-484F-8772-54A424C9799B	41106	methotrexate	[Not Available]	Chemotherapy	274	NO	275	Stable Disease	[Not Available]	[Not Available]	[Not Available]	[Not Available]	[Not Available]	[Not Available]	[Not Available]	[Not Available]	[Not Available]	[Not Available]	[Not Available]	[Not Available]	[Not Available]	[Not Applicable]	[Not Available]	NO
4570B6E2-D430-41CA-AAB1-CE4D14C36463	TCGA-FD-A3SL	TCGA-FD-A3SL-D33649	BB25DB8B-51F1-4153-ABE2-B39BD289CCE7	41106	gemcitabine	[Not Available]	Chemotherapy	302	YES	[Not Available]	[Not Applicable]	[Not Available]	[Not Available]	[Not Available]	[Not Available]	[Not Available]	[Not Available]	[Not Available]	[Not Available]	[Not Available]	[Not Available]	[Not Available]	[Not Available]	[Not Available]	[Not Applicable]	[Not Available]	NO
4570B6E2-D430-41CA-AAB1-CE4D14C36463	TCGA-FD-A3SL	TCGA-FD-A3SL-D33756	EED1ECB8-D31C-45AA-AE8F-096151C2119B	41106	cisplatin	[Not Available]	Chemotherapy	302	YES	[Not Available]	[Not Applicable]	[Not Available]	[Not Available]	[Not Available]	[Not Available]	[Not Available]	[Not Available]	[Not Available]	[Not Available]	[Not Available]	[Not Available]	[Not Available]	[Not Available]	[Not Available]	[Not Applicable]	[Not Available]	NO
0FB043D3-D86B-4CD8-8C01-9E2B3E965BB0	TCGA-FD-A3SN	TCGA-FD-A3SN-D33683	45258132-2CEA-49CB-AE98-AC10A19FBE4F	41106	cisplatin	[Not Available]	Chemotherapy	117	YES	[Not Available]	[Not Applicable]	[Not Available]	[Not Available]	[Not Available]	[Not Available]	[Not Available]	[Not Available]	[Not Available]	[Not Available]	[Not Available]	[Not Available]	[Not Available]	[Not Available]	[Not Available]	[Not Applicable]	[Not Available]	NO
0FB043D3-D86B-4CD8-8C01-9E2B3E965BB0	TCGA-FD-A3SN	TCGA-FD-A3SN-D33651	EE5DDF30-665A-41D3-B2F7-DF00A66F9AF7	41106	gemcitabine	[Not Available]	Chemotherapy	117	YES	[Not Available]	[Not Applicable]	[Not Available]	[Not Available]	[Not Available]	[Not Available]	[Not Available]	[Not Available]	[Not Available]	[Not Available]	[Not Available]	[Not Available]	[Not Available]	[Not Available]	[Not Available]	[Not Applicable]	[Not Available]	NO
94809FBF-4895-42C0-A7C6-F39EE1A41F1A	TCGA-FD-A3SO	TCGA-FD-A3SO-D33761	9B5A5F82-649E-4766-9335-08E0AB8066EF	41106	gemcitabine	[Not Available]	Chemotherapy	65	NO	141	Clinical Progressive Disease	[Not Available]	[Not Available]	[Not Available]	[Not Available]	[Not Available]	[Not Available]	[Not Available]	[Not Available]	[Not Available]	[Not Available]	[Not Available]	[Not Available]	[Not Available]	[Not Applicable]	[Not Available]	NO
94809FBF-4895-42C0-A7C6-F39EE1A41F1A	TCGA-FD-A3SO	TCGA-FD-A3SO-D33762	AD1913FA-7D64-48EC-8466-E69C289C73EA	41106	cisplatin	[Not Available]	Chemotherapy	66	NO	141	Clinical Progressive Disease	[Not Available]	[Not Available]	[Not Available]	[Not Available]	[Not Available]	[Not Available]	[Not Available]	[Not Available]	[Not Available]	[Not Available]	[Not Available]	[Not Available]	[Not Available]	[Not Applicable]	[Not Available]	NO
5F99DCFF-D809-4C87-8024-C9B30BD565E9	TCGA-FD-A3SP	TCGA-FD-A3SP-D33682	EC4345EC-ED68-4CC4-A3D2-FCC1D18496EE	41106	vinblastine	[Not Available]	Chemotherapy	62	NO	104	[Unknown]	[Not Available]	[Not Available]	[Not Available]	[Not Available]	[Not Available]	[Not Available]	[Not Available]	[Not Available]	[Not Available]	[Not Available]	[Not Available]	[Not Available]	[Not Available]	[Not Applicable]	[Not Available]	NO
5F99DCFF-D809-4C87-8024-C9B30BD565E9	TCGA-FD-A3SP	TCGA-FD-A3SP-D33681	A32E7CE7-B4D1-41E0-AF63-C26330A75697	41106	methotrexate	[Not Available]	Chemotherapy	62	NO	104	[Unknown]	[Not Available]	[Not Available]	[Not Available]	[Not Available]	[Not Available]	[Not Available]	[Not Available]	[Not Available]	[Not Available]	[Not Available]	[Not Available]	[Not Available]	[Not Available]	[Not Applicable]	[Not Available]	NO
5F99DCFF-D809-4C87-8024-C9B30BD565E9	TCGA-FD-A3SP	TCGA-FD-A3SP-D33680	A064C5AC-02E1-47FB-9C5E-5C17018C8E74	41106	Adriamycin	[Not Available]	Chemotherapy	62	NO	104	[Unknown]	[Not Available]	[Not Available]	[Not Available]	[Not Available]	[Not Available]	[Not Available]	[Not Available]	[Not Available]	[Not Available]	[Not Available]	[Not Available]	[Not Available]	[Not Available]	[Not Applicable]	[Not Available]	NO
5F99DCFF-D809-4C87-8024-C9B30BD565E9	TCGA-FD-A3SP	TCGA-FD-A3SP-D33652	4BE7B781-6C12-4067-B136-2724AB31EFAE	41106	cisplatin	[Not Available]	Chemotherapy	62	NO	104	[Unknown]	[Not Available]	[Not Available]	[Not Available]	[Not Available]	[Not Available]	[Not Available]	[Not Available]	[Not Available]	[Not Available]	[Not Available]	[Not Available]	[Not Available]	[Not Available]	[Not Applicable]	[Not Available]	NO
3071CB51-DCF5-41F7-B047-AFC2DCBF0AAF	TCGA-FD-A3SQ	TCGA-FD-A3SQ-D33675	81447471-FB3B-4D05-B527-98E45F069D2B	41106	cisplatin	[Not Available]	Chemotherapy	78	NO	151	Stable Disease	[Not Available]	[Not Available]	[Not Available]	[Not Available]	[Not Available]	[Not Available]	[Not Available]	[Not Available]	[Not Available]	[Not Available]	[Not Available]	[Not Available]	[Not Available]	[Not Applicable]	[Not Available]	NO
3071CB51-DCF5-41F7-B047-AFC2DCBF0AAF	TCGA-FD-A3SQ	TCGA-FD-A3SQ-D33653	8D7B7DDD-FDC7-4951-B8A2-445454530940	41106	gemcitabine	[Not Available]	Chemotherapy	78	NO	151	Stable Disease	[Not Available]	[Not Available]	[Not Available]	[Not Available]	[Not Available]	[Not Available]	[Not Available]	[Not Available]	[Not Available]	[Not Available]	[Not Available]	[Not Available]	[Not Available]	[Not Applicable]	[Not Available]	NO
72D6E9AA-4A99-4FC9-A67B-4631E95FB043	TCGA-FD-A3SR	TCGA-FD-A3SR-D33654	9C56F2E6-F86F-4A57-9158-0793C716E037	41106	gemcitabine	[Not Available]	Chemotherapy	146	NO	244	[Unknown]	[Not Available]	[Not Available]	[Not Available]	[Not Available]	[Not Available]	[Not Available]	[Not Available]	[Not Available]	[Not Available]	[Not Available]	[Not Available]	[Not Available]	[Not Available]	[Not Applicable]	[Not Available]	NO
72D6E9AA-4A99-4FC9-A67B-4631E95FB043	TCGA-FD-A3SR	TCGA-FD-A3SR-D33754	FD615382-1046-48B0-B4E1-13B62563CA35	41106	cisplatin	[Not Available]	Chemotherapy	146	NO	244	[Unknown]	[Not Available]	[Not Available]	[Not Available]	[Not Available]	[Not Available]	[Not Available]	[Not Available]	[Not Available]	[Not Available]	[Not Available]	[Not Available]	[Not Available]	[Not Available]	[Not Applicable]	[Not Available]	NO
7B98B829-FDC7-4719-BEE9-C83F6154019C	TCGA-FD-A3SS	TCGA-FD-A3SS-D33752	CED740F1-EA01-4484-86E5-C70E0A8F09D6	41106	gemcitabine	[Not Available]	Chemotherapy	87	YES	[Not Available]	[Not Applicable]	[Not Available]	[Not Available]	[Not Available]	[Not Available]	[Not Available]	[Not Available]	[Not Available]	[Not Available]	[Not Available]	[Not Available]	[Not Available]	[Not Available]	[Not Available]	[Not Applicable]	[Not Available]	NO
7B98B829-FDC7-4719-BEE9-C83F6154019C	TCGA-FD-A3SS	TCGA-FD-A3SS-D33753	8668A690-F52F-42C2-92BF-02C09FA20491	41106	cisplatin	[Not Available]	Chemotherapy	87	YES	[Not Available]	[Not Applicable]	[Not Available]	[Not Available]	[Not Available]	[Not Available]	[Not Available]	[Not Available]	[Not Available]	[Not Available]	[Not Available]	[Not Available]	[Not Available]	[Not Available]	[Not Available]	[Not Applicable]	[Not Available]	NO
77236911-D9E0-4B85-829A-A98F1E4B92D2	TCGA-FD-A43S	TCGA-FD-A43S-D37178	04F50A93-E799-4689-B04D-4ED2F5117807	41242	gemcitabine	[Not Available]	Chemotherapy	111	NO	175	Complete Response	[Not Available]	[Not Available]	[Not Available]	[Not Available]	[Not Available]	[Not Available]	[Not Available]	[Not Available]	[Not Available]	[Not Available]	[Not Available]	[Not Available]	[Not Available]	[Not Applicable]	[Not Available]	NO
77236911-D9E0-4B85-829A-A98F1E4B92D2	TCGA-FD-A43S	TCGA-FD-A43S-D37179	4A856656-F609-4E8A-9DC5-FB385BFA1330	41242	cisplatin	[Not Available]	Chemotherapy	111	NO	175	Complete Response	[Not Available]	[Not Available]	[Not Available]	[Not Available]	[Not Available]	[Not Available]	[Not Available]	[Not Available]	[Not Available]	[Not Available]	[Not Available]	[Not Available]	[Not Available]	[Not Applicable]	[Not Available]	NO
140B83DB-BADD-4B8D-B0F5-0F8C8060A228	TCGA-FD-A43U	TCGA-FD-A43U-D37162	30047ACF-3C71-424A-96A3-91A9B5088E03	41242	cisplatin	[Not Available]	Chemotherapy	97	NO	187	Complete Response	[Not Available]	[Not Available]	[Not Available]	[Not Available]	[Not Available]	[Not Available]	[Not Available]	[Not Available]	[Not Available]	[Not Available]	[Not Available]	[Not Available]	[Not Available]	[Not Applicable]	[Not Available]	NO
140B83DB-BADD-4B8D-B0F5-0F8C8060A228	TCGA-FD-A43U	TCGA-FD-A43U-D37161	1A5B47F2-E3BC-4326-A144-6A2149549E64	41242	gemcitabine	[Not Available]	Chemotherapy	97	NO	187	Complete Response	[Not Available]	[Not Available]	[Not Available]	[Not Available]	[Not Available]	[Not Available]	[Not Available]	[Not Available]	[Not Available]	[Not Available]	[Not Available]	[Not Available]	[Not Available]	[Not Applicable]	[Not Available]	NO
B581E799-93D1-4F1C-BCB7-7E7AE86A869E	TCGA-FD-A5BS	TCGA-FD-A5BS-D42843	5EB61728-0F85-4E66-A57A-E18B2A18A99F	41395	Gemcitabine	[Not Available]	Chemotherapy	777	NO	854	Complete Response	[Not Available]	[Not Available]	[Not Available]	[Not Available]	[Not Available]	[Not Available]	[Not Available]	[Not Available]	[Not Available]	[Not Available]	[Not Available]	[Not Available]	[Not Available]	[Not Applicable]	[Not Available]	NO
B581E799-93D1-4F1C-BCB7-7E7AE86A869E	TCGA-FD-A5BS	TCGA-FD-A5BS-D42845	D9E3F149-3C29-49FA-91B5-5BC112FBA477	41395	Cisplatin	[Not Available]	Chemotherapy	777	NO	854	Complete Response	[Not Available]	[Not Available]	[Not Available]	[Not Available]	[Not Available]	[Not Available]	[Not Available]	[Not Available]	[Not Available]	[Not Available]	[Not Available]	[Not Available]	[Not Available]	[Not Applicable]	[Not Available]	NO
0628E443-3D7F-4A38-9D2A-EBC7F4F7E11D	TCGA-FD-A5C0	TCGA-FD-A5C0-D52786	8E6819B1-FF17-4577-A360-DA93229C7D85	41614	Carboplatin	[Not Available]	Chemotherapy	160	NO	307	[Unknown]	[Not Available]	[Not Available]	[Not Available]	[Not Available]	[Not Available]	[Not Available]	[Not Available]	[Not Available]	[Not Available]	[Not Available]	[Not Available]	[Not Available]	[Not Available]	[Not Applicable]	[Not Available]	NO
0628E443-3D7F-4A38-9D2A-EBC7F4F7E11D	TCGA-FD-A5C0	TCGA-FD-A5C0-D66959	88613404-91D6-490E-BD7F-7B1AA3B8861B	41940	Taxol	[Not Available]	Chemotherapy	160	NO	279	[Unknown]	[Not Available]	[Not Available]	[Not Available]	[Not Available]	[Not Available]	[Not Available]	[Not Available]	[Not Available]	[Not Available]	[Not Available]	[Not Available]	[Not Available]	[Not Available]	[Not Applicable]	[Not Available]	NO
070C66FA-EF48-46CB-AF4F-357D2C641118	TCGA-FD-A5C1	TCGA-FD-A5C1-D42881	45375F4F-6BC8-465E-98F1-108048498790	41396	Cisplatin	[Not Available]	Chemotherapy	1421	NO	1491	Complete Response	[Not Available]	[Not Available]	[Not Available]	[Not Available]	[Not Available]	[Not Available]	[Not Available]	[Not Available]	[Not Available]	[Not Available]	[Not Available]	[Not Available]	[Not Available]	[Not Applicable]	[Not Available]	NO
070C66FA-EF48-46CB-AF4F-357D2C641118	TCGA-FD-A5C1	TCGA-FD-A5C1-D42882	6E578A68-195F-420D-BE0E-7E95AFF64298	41396	Gemcitabine	[Not Available]	Chemotherapy	1421	NO	1491	Complete Response	[Not Available]	[Not Available]	[Not Available]	[Not Available]	[Not Available]	[Not Available]	[Not Available]	[Not Available]	[Not Available]	[Not Available]	[Not Available]	[Not Available]	[Not Available]	[Not Applicable]	[Not Available]	NO
05A1402E-5A79-4D54-9430-065844ED1505	TCGA-FD-A62S	TCGA-FD-A62S-D59247	70601C33-808B-4205-B4A0-5E13B0222A74	41765	Gemcitabine	[Not Available]	Chemotherapy	243	NO	292	Clinical Progressive Disease	[Not Available]	[Not Available]	[Not Available]	[Not Available]	[Not Available]	[Not Available]	[Not Available]	[Not Available]	[Not Available]	[Not Available]	[Not Available]	[Not Available]	[Not Available]	[Not Applicable]	[Not Available]	NO
05A1402E-5A79-4D54-9430-065844ED1505	TCGA-FD-A62S	TCGA-FD-A62S-D59248	7810A477-A6E8-4F7D-9010-A459ACF20768	41765	Carboplatin	[Not Available]	Chemotherapy	243	NO	292	Clinical Progressive Disease	[Not Available]	[Not Available]	[Not Available]	[Not Available]	[Not Available]	[Not Available]	[Not Available]	[Not Available]	[Not Available]	[Not Available]	[Not Available]	[Not Available]	[Not Available]	[Not Applicable]	[Not Available]	NO
FCDA9873-3A93-40B2-913D-4DF1E6A27EFB	TCGA-FD-A6TA	TCGA-FD-A6TA-D52340	7F99BFE6-098D-42D2-ACF4-4DE6EBCD0CF9	41613	Methotrexate	[Not Available]	Chemotherapy	55	NO	92	[Not Available]	[Not Available]	[Not Available]	[Not Available]	[Not Available]	[Not Available]	[Not Available]	[Not Available]	[Not Available]	[Not Available]	[Not Available]	[Not Available]	[Not Available]	[Not Available]	[Not Applicable]	[Not Available]	NO
FCDA9873-3A93-40B2-913D-4DF1E6A27EFB	TCGA-FD-A6TA	TCGA-FD-A6TA-D68612	53028C3F-EDF0-42BA-B671-46F9CE25945F	41976	Vinblastine	[Not Available]	Chemotherapy	55	NO	92	[Not Available]	[Not Available]	[Not Available]	[Not Available]	[Not Available]	[Not Available]	[Not Available]	[Not Available]	[Not Available]	[Not Available]	[Not Available]	[Not Available]	[Not Available]	[Not Available]	[Not Applicable]	[Not Available]	NO
FCDA9873-3A93-40B2-913D-4DF1E6A27EFB	TCGA-FD-A6TA	TCGA-FD-A6TA-D68613	5ADC65CB-A99A-4D85-BF5E-4ED74495D402	41976	Adriamycin	[Not Available]	Chemotherapy	55	NO	92	[Not Available]	[Not Available]	[Not Available]	[Not Available]	[Not Available]	[Not Available]	[Not Available]	[Not Available]	[Not Available]	[Not Available]	[Not Available]	[Not Available]	[Not Available]	[Not Available]	[Not Applicable]	[Not Available]	NO
FCDA9873-3A93-40B2-913D-4DF1E6A27EFB	TCGA-FD-A6TA	TCGA-FD-A6TA-D68614	3AEE3F5E-6B5D-4567-B3A5-8AD855BB1CD7	41976	Cisplatin	[Not Available]	Chemotherapy	55	NO	92	[Not Available]	[Not Available]	[Not Available]	[Not Available]	[Not Available]	[Not Available]	[Not Available]	[Not Available]	[Not Available]	[Not Available]	[Not Available]	[Not Available]	[Not Available]	[Not Available]	[Not Applicable]	[Not Available]	NO
00D8E96F-F231-4475-9E9F-C1F8AEC28E4E	TCGA-FD-A6TC	TCGA-FD-A6TC-D65163	D8EC9D40-C854-49D3-A8D3-728EEA56AF35	41901	Gemcitabine	[Not Available]	Chemotherapy	88	NO	144	Complete Response	[Not Available]	[Not Available]	[Not Available]	[Not Available]	[Not Available]	[Not Available]	[Not Available]	[Not Available]	[Not Available]	[Not Available]	[Not Available]	[Not Available]	[Not Available]	[Not Applicable]	[Not Available]	NO
00D8E96F-F231-4475-9E9F-C1F8AEC28E4E	TCGA-FD-A6TC	TCGA-FD-A6TC-D68615	A4A05996-848F-40E6-9B5F-A788FE319189	41976	Carboplatin	[Not Available]	Chemotherapy	88	NO	144	[Not Available]	[Not Available]	[Not Available]	[Not Available]	[Not Available]	[Not Available]	[Not Available]	[Not Available]	[Not Available]	[Not Available]	[Not Available]	[Not Available]	[Not Available]	[Not Available]	[Not Applicable]	[Not Available]	NO
6B2D63F2-F390-4601-9640-F769F6E91BF4	TCGA-FJ-A3Z7	TCGA-FJ-A3Z7-D35226	47E93333-1850-4C38-8E1D-5A7864798362	41179	Cisplatin	[Not Available]	Chemotherapy	70	NO	70	Complete Response	[Not Available]	[Not Available]	[Not Available]	[Not Available]	[Not Available]	[Not Available]	[Not Available]	[Not Available]	[Not Available]	[Not Available]	[Not Available]	[Not Available]	[Not Available]	[Not Applicable]	[Not Available]	NO
6B2D63F2-F390-4601-9640-F769F6E91BF4	TCGA-FJ-A3Z7	TCGA-FJ-A3Z7-D35227	7DBE2237-5295-4C81-ABB9-B097799A7E3B	41179	Gemcitabine	[Not Available]	Chemotherapy	70	NO	70	Complete Response	[Not Available]	[Not Available]	[Not Available]	[Not Available]	[Not Available]	[Not Available]	[Not Available]	[Not Available]	[Not Available]	[Not Available]	[Not Available]	[Not Available]	[Not Available]	[Not Applicable]	[Not Available]	NO
72FF655F-BB08-40ED-B4C3-E9497D4DA108	TCGA-FJ-A3Z9	TCGA-FJ-A3Z9-D39901	E9218D07-B328-4398-A40D-51E36F5B70F6	41310	Gemcitabine	[Not Available]	Chemotherapy	32	NO	122	Complete Response	[Not Available]	[Not Available]	[Not Available]	[Not Available]	[Not Available]	[Not Available]	[Not Available]	[Not Available]	[Not Available]	[Not Available]	[Not Available]	[Not Available]	[Not Available]	[Not Applicable]	[Not Available]	NO
72FF655F-BB08-40ED-B4C3-E9497D4DA108	TCGA-FJ-A3Z9	TCGA-FJ-A3Z9-D39902	62362BC9-BED1-4D5D-A0B2-92104A2AA5BB	41310	Cisplatin	[Not Available]	Chemotherapy	46	NO	89	Complete Response	[Not Available]	[Not Available]	[Not Available]	[Not Available]	[Not Available]	[Not Available]	[Not Available]	[Not Available]	[Not Available]	[Not Available]	[Not Available]	[Not Available]	[Not Available]	[Not Applicable]	[Not Available]	NO
FAE38579-5FE2-4D81-9729-39FDE866D18C	TCGA-FJ-A3ZF	TCGA-FJ-A3ZF-D35448	915AE1D4-FC2F-435B-A9C0-50399F927849	41180	Gemcitabine	[Not Available]	Chemotherapy	41	NO	104	[Unknown]	[Not Available]	[Not Available]	[Not Available]	[Not Available]	[Not Available]	[Not Available]	[Not Available]	[Not Available]	[Not Available]	[Not Available]	[Not Available]	[Not Available]	[Not Available]	[Not Applicable]	[Not Available]	NO
FAE38579-5FE2-4D81-9729-39FDE866D18C	TCGA-FJ-A3ZF	TCGA-FJ-A3ZF-D35449	46DD0CD8-0491-49DE-8BA6-AEA205781F11	41180	Cisplatin	[Not Available]	Chemotherapy	41	NO	104	[Unknown]	[Not Available]	[Not Available]	[Not Available]	[Not Available]	[Not Available]	[Not Available]	[Not Available]	[Not Available]	[Not Available]	[Not Available]	[Not Available]	[Not Available]	[Not Available]	[Not Applicable]	[Not Available]	NO
BB38805E-2CCC-4169-BA01-34B98ADF5BD0	TCGA-FJ-A871	TCGA-FJ-A871-D56216	4B766531-8A57-4E13-A7A9-A1EC9B1D7F3A	41677	Gemcitabine	[Not Available]	Chemotherapy	84	NO	91	Clinical Progressive Disease	[Not Available]	[Not Available]	[Not Available]	[Not Available]	[Not Available]	[Not Available]	[Not Available]	[Not Available]	[Not Available]	[Not Available]	[Not Available]	[Not Available]	[Not Available]	[Not Applicable]	[Not Available]	NO
BB38805E-2CCC-4169-BA01-34B98ADF5BD0	TCGA-FJ-A871	TCGA-FJ-A871-D56218	108BD781-9598-4C1E-8FE8-D1D61B9C7630	41677	Cisplatin	[Not Available]	Chemotherapy	84	NO	205	Clinical Progressive Disease	[Not Available]	[Not Available]	[Not Available]	[Not Available]	[Not Available]	[Not Available]	[Not Available]	[Not Available]	[Not Available]	[Not Available]	[Not Available]	[Not Available]	[Not Available]	[Not Applicable]	[Not Available]	NO
BB38805E-2CCC-4169-BA01-34B98ADF5BD0	TCGA-FJ-A871	TCGA-FJ-A871-D56219	471F6C0B-5E2C-4A14-93A5-2F1FB12C6B3F	41677	Methotrexate	[Not Available]	Chemotherapy	113	NO	205	Clinical Progressive Disease	[Not Available]	[Not Available]	[Not Available]	[Not Available]	[Not Available]	[Not Available]	[Not Available]	[Not Available]	[Not Available]	[Not Available]	[Not Available]	[Not Available]	[Not Available]	[Not Applicable]	[Not Available]	NO
BB38805E-2CCC-4169-BA01-34B98ADF5BD0	TCGA-FJ-A871	TCGA-FJ-A871-D56221	508CF5FA-BE2F-4FE1-988D-8D8E4B68505B	41677	Vinblastine	[Not Available]	Chemotherapy	113	NO	205	Clinical Progressive Disease	[Not Available]	[Not Available]	[Not Available]	[Not Available]	[Not Available]	[Not Available]	[Not Available]	[Not Available]	[Not Available]	[Not Available]	[Not Available]	[Not Available]	[Not Available]	[Not Applicable]	[Not Available]	NO
BB38805E-2CCC-4169-BA01-34B98ADF5BD0	TCGA-FJ-A871	TCGA-FJ-A871-D56222	1CCD314B-CA6D-4689-BC55-517977BB239F	41677	Doxorubicin	[Not Available]	Chemotherapy	113	NO	189	Clinical Progressive Disease	[Not Available]	[Not Available]	[Not Available]	[Not Available]	[Not Available]	[Not Available]	[Not Available]	[Not Available]	[Not Available]	[Not Available]	[Not Available]	[Not Available]	[Not Available]	[Not Applicable]	[Not Available]	NO
28E25FFB-8B0C-4839-A735-ED7B78E3213A	TCGA-G2-A2EC	TCGA-G2-A2EC-D32966	5F880A8D-BB78-4B6D-93D7-F74316C6BA12	41078	Avastin	[Not Available]	Chemotherapy	24	NO	75	Partial Response	[Not Available]	[Not Available]	[Not Available]	[Not Available]	[Not Available]	[Not Available]	[Not Available]	[Not Available]	[Not Available]	[Not Available]	[Not Available]	[Not Available]	[Not Available]	[Not Applicable]	[Not Available]	YES
28E25FFB-8B0C-4839-A735-ED7B78E3213A	TCGA-G2-A2EC	TCGA-G2-A2EC-D32970	FB24E0AB-685D-4F11-BBB4-5B9BF10D1175	41078	Methotrexate	[Not Available]	Chemotherapy	24	NO	75	Partial Response	[Not Available]	[Not Available]	[Not Available]	[Not Available]	[Not Available]	[Not Available]	[Not Available]	[Not Available]	[Not Available]	[Not Available]	[Not Available]	[Not Available]	[Not Available]	[Not Applicable]	[Not Available]	YES
28E25FFB-8B0C-4839-A735-ED7B78E3213A	TCGA-G2-A2EC	TCGA-G2-A2EC-D32972	0C042234-F74E-44C6-B315-2AED33B22050	41078	Doxorubicin	[Not Available]	Chemotherapy	24	NO	75	Partial Response	[Not Available]	[Not Available]	[Not Available]	[Not Available]	[Not Available]	[Not Available]	[Not Available]	[Not Available]	[Not Available]	[Not Available]	[Not Available]	[Not Available]	[Not Available]	[Not Applicable]	[Not Available]	YES
28E25FFB-8B0C-4839-A735-ED7B78E3213A	TCGA-G2-A2EC	TCGA-G2-A2EC-D32974	33CA9D74-59C9-41FF-9CB0-770323D2CEC2	41078	Vinblastine	[Not Available]	Chemotherapy	24	NO	75	Partial Response	[Not Available]	[Not Available]	[Not Available]	[Not Available]	[Not Available]	[Not Available]	[Not Available]	[Not Available]	[Not Available]	[Not Available]	[Not Available]	[Not Available]	[Not Available]	[Not Applicable]	[Not Available]	YES
28E25FFB-8B0C-4839-A735-ED7B78E3213A	TCGA-G2-A2EC	TCGA-G2-A2EC-D32976	F177C0BC-4D08-4D17-B546-1B4C4560AC32	41078	Cisplatin	[Not Available]	Chemotherapy	24	NO	75	Partial Response	[Not Available]	[Not Available]	[Not Available]	[Not Available]	[Not Available]	[Not Available]	[Not Available]	[Not Available]	[Not Available]	[Not Available]	[Not Available]	[Not Available]	[Not Available]	[Not Applicable]	[Not Available]	YES
2A142731-119C-495D-AD30-EB0B48BACB46	TCGA-G2-A2EF	TCGA-G2-A2EF-D32982	694CAEDC-6696-4C04-8FFA-8185A917C637	41078	Methotrexate	[Not Available]	Chemotherapy	58	NO	170	Partial Response	[Not Available]	[Not Available]	[Not Available]	[Not Available]	[Not Available]	[Not Available]	[Not Available]	[Not Available]	[Not Available]	[Not Available]	[Not Available]	[Not Available]	[Not Available]	[Not Applicable]	[Not Available]	YES
2A142731-119C-495D-AD30-EB0B48BACB46	TCGA-G2-A2EF	TCGA-G2-A2EF-D32999	CE48C3DC-2CAB-4EA1-BFAE-B2F8A374D129	41078	Vinblastine	[Not Available]	Chemotherapy	58	NO	170	Partial Response	[Not Available]	[Not Available]	[Not Available]	[Not Available]	[Not Available]	[Not Available]	[Not Available]	[Not Available]	[Not Available]	[Not Available]	[Not Available]	[Not Available]	[Not Available]	[Not Applicable]	[Not Available]	YES
2A142731-119C-495D-AD30-EB0B48BACB46	TCGA-G2-A2EF	TCGA-G2-A2EF-D33000	6AD678ED-C233-48AB-A30B-A55F7ACA8888	41078	Adriamycin	[Not Available]	Chemotherapy	58	NO	170	Partial Response	[Not Available]	[Not Available]	[Not Available]	[Not Available]	[Not Available]	[Not Available]	[Not Available]	[Not Available]	[Not Available]	[Not Available]	[Not Available]	[Not Available]	[Not Available]	[Not Applicable]	[Not Available]	YES
2A142731-119C-495D-AD30-EB0B48BACB46	TCGA-G2-A2EF	TCGA-G2-A2EF-D33001	27866927-5E9F-496E-98E2-383756CF2470	41078	Cisplatin	[Not Available]	Chemotherapy	58	NO	170	Partial Response	[Not Available]	[Not Available]	[Not Available]	[Not Available]	[Not Available]	[Not Available]	[Not Available]	[Not Available]	[Not Available]	[Not Available]	[Not Available]	[Not Available]	[Not Available]	[Not Applicable]	[Not Available]	YES
C6227D39-D9E8-4E28-9E70-D7F720AB25E4	TCGA-G2-A2EJ	TCGA-G2-A2EJ-D33047	DEDCF85F-17C4-4009-B43B-02B15C96A350	41079	Paclitaxel	[Not Available]	Chemotherapy	38	NO	38	Stable Disease	[Not Available]	[Not Available]	[Not Available]	[Not Available]	[Not Available]	[Not Available]	[Not Available]	[Not Available]	[Not Available]	[Not Available]	[Not Available]	[Not Available]	[Not Available]	[Not Applicable]	[Not Available]	YES
C6227D39-D9E8-4E28-9E70-D7F720AB25E4	TCGA-G2-A2EJ	TCGA-G2-A2EJ-D33048	5DA2805D-F33C-495D-AC31-F558AD5AF82B	41079	MESNA	Chemoprotectant	Ancillary	38	NO	38	Stable Disease	[Not Available]	[Not Available]	[Not Available]	[Not Available]	[Not Available]	[Not Available]	[Not Available]	[Not Available]	[Not Available]	[Not Available]	[Not Available]	[Not Available]	[Not Available]	[Not Applicable]	[Not Available]	YES
C6227D39-D9E8-4E28-9E70-D7F720AB25E4	TCGA-G2-A2EJ	TCGA-G2-A2EJ-D33049	5EE666E4-D150-4D48-8E5C-AF20E5AF64F2	41079	Cisplatin	[Not Available]	Chemotherapy	38	NO	38	Stable Disease	[Not Available]	[Not Available]	[Not Available]	[Not Available]	[Not Available]	[Not Available]	[Not Available]	[Not Available]	[Not Available]	[Not Available]	[Not Available]	[Not Available]	[Not Available]	[Not Applicable]	[Not Available]	YES
C6227D39-D9E8-4E28-9E70-D7F720AB25E4	TCGA-G2-A2EJ	TCGA-G2-A2EJ-D33051	C1846A1C-F3C8-4FEF-B4AC-ABEF8DD94EBE	41079	Ifosfamide	[Not Available]	Chemotherapy	38	NO	38	Stable Disease	[Not Available]	[Not Available]	[Not Available]	[Not Available]	[Not Available]	[Not Available]	[Not Available]	[Not Available]	[Not Available]	[Not Available]	[Not Available]	[Not Available]	[Not Available]	[Not Applicable]	[Not Available]	YES
5DA1CB68-C438-4DDC-999F-90AED0C4BD7A	TCGA-G2-A2EK	TCGA-G2-A2EK-D33053	BC31F705-AC1F-451C-B617-642C19AC6154	41079	Methotrexate	[Not Available]	Chemotherapy	16	NO	51	Stable Disease	[Not Available]	[Not Available]	[Not Available]	[Not Available]	[Not Available]	[Not Available]	[Not Available]	[Not Available]	[Not Available]	[Not Available]	[Not Available]	[Not Available]	[Not Available]	[Not Applicable]	[Not Available]	YES
5DA1CB68-C438-4DDC-999F-90AED0C4BD7A	TCGA-G2-A2EK	TCGA-G2-A2EK-D33055	6BC25833-7CCC-488D-B705-7D6096D35669	41079	Doxorubicin	[Not Available]	Chemotherapy	16	NO	51	Stable Disease	[Not Available]	[Not Available]	[Not Available]	[Not Available]	[Not Available]	[Not Available]	[Not Available]	[Not Available]	[Not Available]	[Not Available]	[Not Available]	[Not Available]	[Not Available]	[Not Applicable]	[Not Available]	YES
5DA1CB68-C438-4DDC-999F-90AED0C4BD7A	TCGA-G2-A2EK	TCGA-G2-A2EK-D33056	C4EB7979-5C32-4875-8828-4EB57A8DD1B8	41079	Vinblastine	[Not Available]	Chemotherapy	16	NO	51	Stable Disease	[Not Available]	[Not Available]	[Not Available]	[Not Available]	[Not Available]	[Not Available]	[Not Available]	[Not Available]	[Not Available]	[Not Available]	[Not Available]	[Not Available]	[Not Available]	[Not Applicable]	[Not Available]	YES
5DA1CB68-C438-4DDC-999F-90AED0C4BD7A	TCGA-G2-A2EK	TCGA-G2-A2EK-D33057	9A57D186-A1F1-4A86-9BE8-3ABE6184F3E0	41079	Cisplatin	[Not Available]	Chemotherapy	16	NO	51	Stable Disease	[Not Available]	[Not Available]	[Not Available]	[Not Available]	[Not Available]	[Not Available]	[Not Available]	[Not Available]	[Not Available]	[Not Available]	[Not Available]	[Not Available]	[Not Available]	[Not Applicable]	[Not Available]	YES
30C7445E-D0C4-4A0F-96A4-27E4259EE10B	TCGA-G2-A2EL	TCGA-G2-A2EL-D33061	CE05EB69-BFCC-4DDE-BBAC-801411756E33	41079	Etoposide	[Not Available]	Chemotherapy	84	NO	147	Stable Disease	[Not Available]	[Not Available]	[Not Available]	[Not Available]	[Not Available]	[Not Available]	[Not Available]	[Not Available]	[Not Available]	[Not Available]	[Not Available]	[Not Available]	[Not Available]	[Not Applicable]	[Not Available]	YES
30C7445E-D0C4-4A0F-96A4-27E4259EE10B	TCGA-G2-A2EL	TCGA-G2-A2EL-D33062	46912AB3-5EC9-44D6-A76B-87E4B79BFCA8	41079	Taxol	[Not Available]	Chemotherapy	84	NO	147	Stable Disease	[Not Available]	[Not Available]	[Not Available]	[Not Available]	[Not Available]	[Not Available]	[Not Available]	[Not Available]	[Not Available]	[Not Available]	[Not Available]	[Not Available]	[Not Available]	[Not Applicable]	[Not Available]	YES
AF53D51E-0B5C-437F-A1C0-EC5F55C49364	TCGA-G2-A3IB	TCGA-G2-A3IB-D66245	97C76471-15CA-4401-8DC2-CF41E785A05C	41918	methotrexate	[Not Available]	Chemotherapy	143	NO	145	Clinical Progressive Disease	[Not Available]	[Not Available]	[Not Available]	[Not Available]	[Not Available]	[Not Available]	[Not Available]	[Not Available]	[Not Available]	[Not Available]	[Not Available]	[Not Available]	[Not Available]	[Not Applicable]	[Not Available]	NO
AF53D51E-0B5C-437F-A1C0-EC5F55C49364	TCGA-G2-A3IB	TCGA-G2-A3IB-D66248	6027EDD0-09D5-4740-BFBB-683474BD2E46	41918	Doxorubicin	[Not Available]	Chemotherapy	143	NO	145	Clinical Progressive Disease	[Not Available]	[Not Available]	[Not Available]	[Not Available]	[Not Available]	[Not Available]	[Not Available]	[Not Available]	[Not Available]	[Not Available]	[Not Available]	[Not Available]	[Not Available]	[Not Applicable]	[Not Available]	NO
AF53D51E-0B5C-437F-A1C0-EC5F55C49364	TCGA-G2-A3IB	TCGA-G2-A3IB-D66249	AD2CE47B-EDF1-41B7-A6F5-37EB9F7FA188	41918	Cisplatin	[Not Available]	Chemotherapy	143	NO	145	Clinical Progressive Disease	[Not Available]	[Not Available]	[Not Available]	[Not Available]	[Not Available]	[Not Available]	[Not Available]	[Not Available]	[Not Available]	[Not Available]	[Not Available]	[Not Available]	[Not Available]	[Not Applicable]	[Not Available]	NO
AF53D51E-0B5C-437F-A1C0-EC5F55C49364	TCGA-G2-A3IB	TCGA-G2-A3IB-D66250	E79E0B30-0DD8-4B1A-A0C0-F8B62FB21AB4	41918	Vinblastine	[Not Available]	Chemotherapy	143	NO	145	Clinical Progressive Disease	[Not Available]	[Not Available]	[Not Available]	[Not Available]	[Not Available]	[Not Available]	[Not Available]	[Not Available]	[Not Available]	[Not Available]	[Not Available]	[Not Available]	[Not Available]	[Not Applicable]	[Not Available]	NO
C65BA2B8-E867-42E8-BBD0-C2CDF5130CFB	TCGA-G2-A3IE	TCGA-G2-A3IE-D36968	ED0AF2E2-5F42-43D0-8D82-0BF7B8D15228	41233	Ifosfamide	[Not Available]	Chemotherapy	29	NO	68	Partial Response	[Not Available]	[Not Available]	[Not Available]	[Not Available]	[Not Available]	[Not Available]	[Not Available]	[Not Available]	[Not Available]	[Not Available]	[Not Available]	[Not Available]	[Not Available]	[Not Applicable]	[Not Available]	NO
C65BA2B8-E867-42E8-BBD0-C2CDF5130CFB	TCGA-G2-A3IE	TCGA-G2-A3IE-D36970	E18F0291-65B2-48A7-9BFF-43C214FEEF5E	41233	Doxorubicin	[Not Available]	Chemotherapy	29	NO	68	Partial Response	[Not Available]	[Not Available]	[Not Available]	[Not Available]	[Not Available]	[Not Available]	[Not Available]	[Not Available]	[Not Available]	[Not Available]	[Not Available]	[Not Available]	[Not Available]	[Not Applicable]	[Not Available]	NO
C65BA2B8-E867-42E8-BBD0-C2CDF5130CFB	TCGA-G2-A3IE	TCGA-G2-A3IE-D36975	EF18CA04-7D1C-4580-B62B-20451BF14EAF	41233	Gemcitabine	[Not Available]	Chemotherapy	29	NO	68	Partial Response	[Not Available]	[Not Available]	[Not Available]	[Not Available]	[Not Available]	[Not Available]	[Not Available]	[Not Available]	[Not Available]	[Not Available]	[Not Available]	[Not Available]	[Not Available]	[Not Applicable]	[Not Available]	NO
C65BA2B8-E867-42E8-BBD0-C2CDF5130CFB	TCGA-G2-A3IE	TCGA-G2-A3IE-D36977	B7D591DE-0ACE-4254-AA10-A217C5B92575	41233	Methotrexate	[Not Available]	Chemotherapy	81	NO	100	Clinical Progressive Disease	[Not Available]	[Not Available]	[Not Available]	[Not Available]	[Not Available]	[Not Available]	[Not Available]	[Not Available]	[Not Available]	[Not Available]	[Not Available]	[Not Available]	[Not Available]	[Not Applicable]	[Not Available]	NO
C65BA2B8-E867-42E8-BBD0-C2CDF5130CFB	TCGA-G2-A3IE	TCGA-G2-A3IE-D36978	A871439A-808A-4E69-A22A-014DB1C06E0A	41233	Doxorubicin	[Not Available]	Chemotherapy	81	NO	100	Clinical Progressive Disease	[Not Available]	[Not Available]	[Not Available]	[Not Available]	[Not Available]	[Not Available]	[Not Available]	[Not Available]	[Not Available]	[Not Available]	[Not Available]	[Not Available]	[Not Available]	[Not Applicable]	[Not Available]	NO
C65BA2B8-E867-42E8-BBD0-C2CDF5130CFB	TCGA-G2-A3IE	TCGA-G2-A3IE-D36980	E6E275FF-BDEA-4F7A-B8DA-3579D9A765F8	41233	Vinblastine	[Not Available]	Chemotherapy	81	NO	100	Clinical Progressive Disease	[Not Available]	[Not Available]	[Not Available]	[Not Available]	[Not Available]	[Not Available]	[Not Available]	[Not Available]	[Not Available]	[Not Available]	[Not Available]	[Not Available]	[Not Available]	[Not Applicable]	[Not Available]	NO
C65BA2B8-E867-42E8-BBD0-C2CDF5130CFB	TCGA-G2-A3IE	TCGA-G2-A3IE-D36983	70591683-FCF3-48E0-8E19-6D1559B9419D	41233	Cisplatin	[Not Available]	Chemotherapy	81	NO	100	Clinical Progressive Disease	[Not Available]	[Not Available]	[Not Available]	[Not Available]	[Not Available]	[Not Available]	[Not Available]	[Not Available]	[Not Available]	[Not Available]	[Not Available]	[Not Available]	[Not Available]	[Not Applicable]	[Not Available]	NO
CD50C69F-0F45-4C57-B61A-8C6B41AB4F7E	TCGA-G2-A3VY	TCGA-G2-A3VY-D66242	7EDDA9A9-E287-44DC-91CE-A32E0E70B88D	41918	[Not Available]	[Not Available]	Chemotherapy	210	NO	210	[Unknown]	[Not Available]	[Not Available]	[Not Available]	[Not Available]	[Not Available]	[Not Available]	[Not Available]	[Not Available]	[Not Available]	[Not Available]	[Not Available]	[Not Available]	[Not Available]	[Not Applicable]	[Not Available]	NO
C04CC413-95B0-4B56-AF55-9596A5EAD4A6	TCGA-G2-AA3C	TCGA-G2-AA3C-D62137	FDF7A539-5619-45CA-8915-57C16EE5D42E	41831	cisplatin	[Not Available]	Chemotherapy	111	NO	200	Clinical Progressive Disease	[Not Available]	[Not Available]	[Not Available]	[Not Available]	[Not Available]	[Not Available]	[Not Available]	[Not Available]	[Not Available]	[Not Available]	[Not Available]	[Not Available]	[Not Available]	[Not Applicable]	[Not Available]	NO
C04CC413-95B0-4B56-AF55-9596A5EAD4A6	TCGA-G2-AA3C	TCGA-G2-AA3C-D62138	FB9A4401-CFEB-4B78-ABD2-AC6B25A42295	41831	gemcitabine	[Not Available]	Chemotherapy	111	NO	200	Clinical Progressive Disease	[Not Available]	[Not Available]	[Not Available]	[Not Available]	[Not Available]	[Not Available]	[Not Available]	[Not Available]	[Not Available]	[Not Available]	[Not Available]	[Not Available]	[Not Available]	[Not Applicable]	[Not Available]	NO
E1540865-69C2-4B60-A78E-97D0CE2957DC	TCGA-G2-AA3D	TCGA-G2-AA3D-D64839	3B181732-907C-4A8B-ACFB-C2287A106CA5	41894	Tarceva	[Not Available]	Chemotherapy	15	NO	35	Complete Response	[Not Available]	[Not Available]	[Not Available]	[Not Available]	[Not Available]	[Not Available]	[Not Available]	[Not Available]	[Not Available]	[Not Available]	[Not Available]	[Not Available]	[Not Available]	[Not Applicable]	[Not Available]	YES
E1540865-69C2-4B60-A78E-97D0CE2957DC	TCGA-G2-AA3D	TCGA-G2-AA3D-D64842	856A8F22-E5B2-4D1D-8FF4-71A85E8004F7	41894	methotrexate	[Not Available]	Chemotherapy	135	NO	178	Complete Response	[Not Available]	[Not Available]	[Not Available]	[Not Available]	[Not Available]	[Not Available]	[Not Available]	[Not Available]	[Not Available]	[Not Available]	[Not Available]	[Not Available]	[Not Available]	[Not Applicable]	[Not Available]	NO
E1540865-69C2-4B60-A78E-97D0CE2957DC	TCGA-G2-AA3D	TCGA-G2-AA3D-D64845	F77B4195-85D3-48AD-81A1-8574236272DE	41894	doxorubicin	[Not Available]	Chemotherapy	135	NO	178	Complete Response	[Not Available]	[Not Available]	[Not Available]	[Not Available]	[Not Available]	[Not Available]	[Not Available]	[Not Available]	[Not Available]	[Not Available]	[Not Available]	[Not Available]	[Not Available]	[Not Applicable]	[Not Available]	NO
E1540865-69C2-4B60-A78E-97D0CE2957DC	TCGA-G2-AA3D	TCGA-G2-AA3D-D64846	C2128A11-E854-4827-A6D6-504653DCA925	41894	vinblastine	[Not Available]	Chemotherapy	135	NO	178	Complete Response	[Not Available]	[Not Available]	[Not Available]	[Not Available]	[Not Available]	[Not Available]	[Not Available]	[Not Available]	[Not Available]	[Not Available]	[Not Available]	[Not Available]	[Not Available]	[Not Applicable]	[Not Available]	NO
E1540865-69C2-4B60-A78E-97D0CE2957DC	TCGA-G2-AA3D	TCGA-G2-AA3D-D64847	7CFD35E6-3228-419D-9266-FA974BB82E8F	41894	cisplatin	[Not Available]	Chemotherapy	135	NO	178	Complete Response	[Not Available]	[Not Available]	[Not Available]	[Not Available]	[Not Available]	[Not Available]	[Not Available]	[Not Available]	[Not Available]	[Not Available]	[Not Available]	[Not Available]	[Not Available]	[Not Applicable]	[Not Available]	NO
9883C38F-87BF-4421-BFC0-1B1001F8159C	TCGA-G2-AA3F	TCGA-G2-AA3F-D71336	AED7E12F-8A43-4630-87A9-9366CCD4D04E	42087	Methotrexate	[Not Available]	Chemotherapy	5	NO	54	Partial Response	[Not Available]	[Not Available]	[Not Available]	[Not Available]	[Not Available]	[Not Available]	[Not Available]	[Not Available]	[Not Available]	[Not Available]	[Not Available]	[Not Available]	[Not Available]	[Not Applicable]	[Not Available]	NO
9883C38F-87BF-4421-BFC0-1B1001F8159C	TCGA-G2-AA3F	TCGA-G2-AA3F-D71338	E5AF71CF-5C34-4A39-82EB-2923D31956B4	42087	vinblastine	[Not Available]	Chemotherapy	5	NO	54	Partial Response	[Not Available]	[Not Available]	[Not Available]	[Not Available]	[Not Available]	[Not Available]	[Not Available]	[Not Available]	[Not Available]	[Not Available]	[Not Available]	[Not Available]	[Not Available]	[Not Applicable]	[Not Available]	NO
9883C38F-87BF-4421-BFC0-1B1001F8159C	TCGA-G2-AA3F	TCGA-G2-AA3F-D71339	C3D86C6B-69FE-4161-A290-F5EA18182DA5	42087	doxorubicin	[Not Available]	Chemotherapy	5	NO	54	Partial Response	[Not Available]	[Not Available]	[Not Available]	[Not Available]	[Not Available]	[Not Available]	[Not Available]	[Not Available]	[Not Available]	[Not Available]	[Not Available]	[Not Available]	[Not Available]	[Not Applicable]	[Not Available]	NO
9883C38F-87BF-4421-BFC0-1B1001F8159C	TCGA-G2-AA3F	TCGA-G2-AA3F-D71340	C72DF01F-E6DA-497E-BD93-20A799528BA7	42087	cisplatin	[Not Available]	Chemotherapy	5	NO	54	Partial Response	[Not Available]	[Not Available]	[Not Available]	[Not Available]	[Not Available]	[Not Available]	[Not Available]	[Not Available]	[Not Available]	[Not Available]	[Not Available]	[Not Available]	[Not Available]	[Not Applicable]	[Not Available]	NO
4D323B18-CE5A-4516-862D-7ED1FDF1F008	TCGA-GC-A3YS	TCGA-GC-A3YS-D64044	FFFA5369-7D67-40A5-A120-A4CD5588F4B7	41876	Gemzar	[Not Available]	Chemotherapy	73	NO	146	Complete Response	[Not Available]	[Not Available]	[Not Available]	[Not Available]	[Not Available]	[Not Available]	[Not Available]	[Not Available]	[Not Available]	[Not Available]	[Not Available]	[Not Available]	[Not Available]	[Not Applicable]	[Not Available]	NO
4D323B18-CE5A-4516-862D-7ED1FDF1F008	TCGA-GC-A3YS	TCGA-GC-A3YS-D64046	F4260A3B-FA17-4169-8CF2-0CBDDD5FE2AF	41876	Cisplatin	[Not Available]	Chemotherapy	73	NO	106	Complete Response	[Not Available]	[Not Available]	[Not Available]	[Not Available]	[Not Available]	[Not Available]	[Not Available]	[Not Available]	[Not Available]	[Not Available]	[Not Available]	[Not Available]	[Not Available]	[Not Applicable]	[Not Available]	NO
4D323B18-CE5A-4516-862D-7ED1FDF1F008	TCGA-GC-A3YS	TCGA-GC-A3YS-D64047	2E38DC3B-C361-45E6-B640-4FF41CEC51DD	41876	Carboplatin	[Not Available]	Chemotherapy	106	NO	146	Complete Response	[Not Available]	[Not Available]	[Not Available]	[Not Available]	[Not Available]	[Not Available]	[Not Available]	[Not Available]	[Not Available]	[Not Available]	[Not Available]	[Not Available]	[Not Available]	[Not Applicable]	[Not Available]	NO
5D54C742-5A8E-4C40-8D62-95E75E210AB8	TCGA-GD-A2C5	TCGA-GD-A2C5-D21668	E55E5EFA-886B-459C-BACD-30859695AE33	40956	[Not Available]	[Not Available]	Chemotherapy	111	NO	325	[Not Available]	[Not Available]	[Not Available]	[Not Available]	[Not Available]	[Not Available]	[Not Available]	[Not Available]	[Not Available]	[Not Available]	[Not Available]	[Not Available]	[Not Available]	PROGRESSION	[Not Applicable]	[Not Available]	[Not Available]
5D54C742-5A8E-4C40-8D62-95E75E210AB8	TCGA-GD-A2C5	TCGA-GD-A2C5-D31662	934CEF5B-A32A-4796-90C2-2EB0E33593C0	41037	Gemcitabine	[Not Available]	Chemotherapy	327	YES	[Not Available]	[Unknown]	[Not Available]	[Not Available]	[Not Available]	[Not Available]	[Not Available]	[Not Available]	[Not Available]	[Not Available]	[Not Available]	[Not Available]	[Not Available]	[Not Available]	[Not Available]	[Not Applicable]	[Not Available]	NO
5D54C742-5A8E-4C40-8D62-95E75E210AB8	TCGA-GD-A2C5	TCGA-GD-A2C5-D34374	BFB231DE-4113-4AE6-98CF-863E2E907185	41134	Cisplatin	[Not Available]	Chemotherapy	327	YES	[Not Available]	[Not Available]	[Not Available]	[Not Available]	[Not Available]	[Not Available]	[Not Available]	[Not Available]	[Not Available]	[Not Available]	[Not Available]	[Not Available]	[Not Available]	[Not Available]	[Not Available]	[Not Applicable]	[Not Available]	NO
5D54C742-5A8E-4C40-8D62-95E75E210AB8	TCGA-GD-A2C5	TCGA-GD-A2C5-D34375	C6AAC7EF-6287-4CDF-8C36-55E7DEAB91F1	41134	fosaprepitant	[Not Available]	[Not Available]	327	YES	[Not Available]	[Not Available]	[Not Available]	[Not Available]	[Not Available]	[Not Available]	[Not Available]	[Not Available]	[Not Available]	[Not Available]	[Not Available]	[Not Available]	[Not Available]	[Not Available]	[Not Available]	[Not Applicable]	[Not Available]	NO
2A41B7D4-132F-4FB6-87B5-487C445379C7	TCGA-GD-A3OS	TCGA-GD-A3OS-D33555	5BF7C585-9318-4F70-B0B9-AFE400CEDF99	41095	Cisplatin	[Not Available]	Chemotherapy	58	NO	156	[Unknown]	[Not Available]	[Not Available]	[Not Available]	[Not Available]	[Not Available]	[Not Available]	[Not Available]	[Not Available]	[Not Available]	[Not Available]	[Not Available]	[Not Available]	[Not Available]	[Not Applicable]	[Not Available]	NO
2A41B7D4-132F-4FB6-87B5-487C445379C7	TCGA-GD-A3OS	TCGA-GD-A3OS-D33556	DCA7681A-7E25-43B0-958E-02E18C6D3A9C	41095	Gemcitabine	[Not Available]	Chemotherapy	58	NO	156	[Unknown]	[Not Available]	[Not Available]	[Not Available]	[Not Available]	[Not Available]	[Not Available]	[Not Available]	[Not Available]	[Not Available]	[Not Available]	[Not Available]	[Not Available]	[Not Available]	[Not Applicable]	[Not Available]	NO
2A41B7D4-132F-4FB6-87B5-487C445379C7	TCGA-GD-A3OS	TCGA-GD-A3OS-D42522	ACBC4B23-5E53-4C87-B64E-6EB9D530A59F	41387	Docetaxel	[Not Available]	Chemotherapy	499	NO	549	Clinical Progressive Disease	[Not Available]	[Not Available]	[Not Available]	[Not Available]	[Not Available]	[Not Available]	[Not Available]	[Not Available]	[Not Available]	[Not Available]	[Not Available]	[Not Available]	[Not Available]	[Not Applicable]	[Not Available]	NO
0691B8C5-6244-407C-8601-FA1BDA01FF2A	TCGA-GU-A42R	TCGA-GU-A42R-D66344	37B5BF80-1114-4AC1-A162-AEA65A922BFD	41922	Carboplatin	[Not Available]	Chemotherapy	105	NO	344	Clinical Progressive Disease	[Not Available]	[Not Available]	[Not Available]	[Not Available]	[Not Available]	[Not Available]	[Not Available]	[Not Available]	[Not Available]	[Not Available]	[Not Available]	[Not Available]	[Not Available]	[Not Applicable]	[Not Available]	NO
0691B8C5-6244-407C-8601-FA1BDA01FF2A	TCGA-GU-A42R	TCGA-GU-A42R-D66345	AC9DC3F1-BB17-4D91-B956-0AB30EF5F8AD	41922	Gemcitabine	[Not Available]	Chemotherapy	105	NO	344	Clinical Progressive Disease	[Not Available]	[Not Available]	[Not Available]	[Not Available]	[Not Available]	[Not Available]	[Not Available]	[Not Available]	[Not Available]	[Not Available]	[Not Available]	[Not Available]	[Not Available]	[Not Applicable]	[Not Available]	NO
3D644EAF-82FC-4BC7-93B7-3E600E8C6511	TCGA-GV-A3JW	TCGA-GV-A3JW-D41958	468BA57F-D035-4485-AACC-4B98C6DA1D64	41372	Carboplatin	[Not Available]	Chemotherapy	291	NO	321	Partial Response	[Not Available]	[Not Available]	[Not Available]	[Not Available]	[Not Available]	[Not Available]	[Not Available]	[Not Available]	[Not Available]	[Not Available]	[Not Available]	[Not Available]	[Not Available]	[Not Applicable]	[Not Available]	NO
3D644EAF-82FC-4BC7-93B7-3E600E8C6511	TCGA-GV-A3JW	TCGA-GV-A3JW-D41960	2D58D7E3-0704-4B8C-9F30-70D128D38753	41372	Gemzar	[Not Available]	Chemotherapy	291	NO	321	Partial Response	[Not Available]	[Not Available]	[Not Available]	[Not Available]	[Not Available]	[Not Available]	[Not Available]	[Not Available]	[Not Available]	[Not Available]	[Not Available]	[Not Available]	[Not Available]	[Not Applicable]	[Not Available]	NO
9CC92795-7A24-4875-87F0-3EFCCBFCC970	TCGA-GV-A3JZ	TCGA-GV-A3JZ-D41963	65B99415-8F16-4D70-A4AE-11936DC426D0	41372	[Not Available]	Chemotherapy	Chemotherapy	529	NO	589	Stable Disease	[Not Available]	[Not Available]	[Not Available]	[Not Available]	[Not Available]	[Not Available]	[Not Available]	[Not Available]	[Not Available]	[Not Available]	[Not Available]	[Not Available]	[Not Available]	[Not Applicable]	[Not Available]	YES
47990D5E-A0E1-4752-86F5-4F5B84E219DF	TCGA-GV-A3QF	TCGA-GV-A3QF-D34428	C3084EB0-5C6B-4C02-8C48-9A1153E1241B	41135	Carboplatin	[Not Available]	Chemotherapy	197	NO	246	Stable Disease	[Not Available]	[Not Available]	[Not Available]	[Not Available]	[Not Available]	[Not Available]	[Not Available]	[Not Available]	[Not Available]	[Not Available]	[Not Available]	[Not Available]	[Not Available]	[Not Applicable]	[Not Available]	NO
47990D5E-A0E1-4752-86F5-4F5B84E219DF	TCGA-GV-A3QF	TCGA-GV-A3QF-D34429	9B75FBD1-AA78-46F4-A764-2940950BAF52	41135	Gemcitabine	[Not Available]	Chemotherapy	197	NO	261	Stable Disease	[Not Available]	[Not Available]	[Not Available]	[Not Available]	[Not Available]	[Not Available]	[Not Available]	[Not Available]	[Not Available]	[Not Available]	[Not Available]	[Not Available]	[Not Available]	[Not Applicable]	[Not Available]	NO
33BC6A7C-9844-41E3-96B3-1E34BB3FEDD5	TCGA-GV-A3QH	TCGA-GV-A3QH-D34426	9CF70C19-B60F-494B-948B-D1E6355C2A91	41135	CDDP	[Not Available]	Chemotherapy	135	NO	170	Clinical Progressive Disease	[Not Available]	[Not Available]	[Not Available]	[Not Available]	[Not Available]	[Not Available]	[Not Available]	[Not Available]	[Not Available]	[Not Available]	[Not Available]	[Not Available]	[Not Available]	[Not Applicable]	[Not Available]	NO
33BC6A7C-9844-41E3-96B3-1E34BB3FEDD5	TCGA-GV-A3QH	TCGA-GV-A3QH-D34427	31442F55-E1D1-40C8-B27E-2AF7845AC2BF	41135	Gemcitabine	[Not Available]	Chemotherapy	135	NO	170	Clinical Progressive Disease	[Not Available]	[Not Available]	[Not Available]	[Not Available]	[Not Available]	[Not Available]	[Not Available]	[Not Available]	[Not Available]	[Not Available]	[Not Available]	[Not Available]	[Not Available]	[Not Applicable]	[Not Available]	NO
06F936E9-5A90-40D3-B91A-713F2B4E6E11	TCGA-GV-A3QI	TCGA-GV-A3QI-D68565	94144F45-DE4A-4761-ACAA-075FEFF890D8	41969	Gemcitabine	[Not Available]	Chemotherapy	771	NO	895	Clinical Progressive Disease	[Not Available]	[Not Available]	[Not Available]	[Not Available]	[Not Available]	[Not Available]	[Not Available]	[Not Available]	[Not Available]	[Not Available]	[Not Available]	[Not Available]	[Not Available]	[Not Applicable]	[Not Available]	NO
9EE8E704-C61D-413D-B69D-257EF829FDAE	TCGA-GV-A3QK	TCGA-GV-A3QK-D35602	C74D30C4-190A-42DE-9532-944A0DAD0793	41185	Cisplatin	[Not Available]	Chemotherapy	126	YES	[Not Available]	[Not Applicable]	[Not Available]	[Not Available]	[Not Available]	[Not Available]	[Not Available]	[Not Available]	[Not Available]	[Not Available]	[Not Available]	[Not Available]	[Not Available]	[Not Available]	[Not Available]	[Not Applicable]	[Not Available]	NO
9EE8E704-C61D-413D-B69D-257EF829FDAE	TCGA-GV-A3QK	TCGA-GV-A3QK-D35603	21762143-7F76-4C09-B8A0-708E0368877E	41185	Gemcitabine	[Not Available]	Chemotherapy	126	YES	[Not Available]	[Not Applicable]	[Not Available]	[Not Available]	[Not Available]	[Not Available]	[Not Available]	[Not Available]	[Not Available]	[Not Available]	[Not Available]	[Not Available]	[Not Available]	[Not Available]	[Not Available]	[Not Applicable]	[Not Available]	NO
AA6142AF-BAD7-493C-98A0-FD070DE39073	TCGA-GV-A40E	TCGA-GV-A40E-D46771	80544398-4595-44E5-9650-9587BA3A39A8	41526	Cisplatin	[Not Available]	Chemotherapy	56	NO	98	Clinical Progressive Disease	[Not Available]	[Not Available]	[Not Available]	[Not Available]	[Not Available]	[Not Available]	[Not Available]	[Not Available]	[Not Available]	[Not Available]	[Not Available]	[Not Available]	[Not Available]	[Not Applicable]	[Not Available]	NO
AA6142AF-BAD7-493C-98A0-FD070DE39073	TCGA-GV-A40E	TCGA-GV-A40E-D46772	33632558-830A-43A8-90A6-7E36DF5AE959	41526	Gemzar	[Not Available]	Chemotherapy	56	NO	98	Clinical Progressive Disease	[Not Available]	[Not Available]	[Not Available]	[Not Available]	[Not Available]	[Not Available]	[Not Available]	[Not Available]	[Not Available]	[Not Available]	[Not Available]	[Not Available]	[Not Available]	[Not Applicable]	[Not Available]	NO
353C5FCC-9C6A-4AC6-99DC-FB4573B2AE6C	TCGA-HQ-A2OE	TCGA-HQ-A2OE-D34458	3754F06A-C313-4AE5-80B9-06DB74337512	41184	Cisplatin	[Not Available]	Chemotherapy	56	NO	131	[Not Available]	[Not Available]	[Not Available]	[Not Available]	[Not Available]	[Not Available]	[Not Available]	[Not Available]	[Not Available]	[Not Available]	[Not Available]	[Not Available]	[Not Available]	[Not Available]	[Not Applicable]	[Not Available]	[Not Available]
353C5FCC-9C6A-4AC6-99DC-FB4573B2AE6C	TCGA-HQ-A2OE	TCGA-HQ-A2OE-D34465	513FCD32-09D2-4E51-B3A5-26F80E568B31	41184	Gemcitabine	[Not Available]	Chemotherapy	56	NO	131	[Not Available]	[Not Available]	[Not Available]	[Not Available]	[Not Available]	[Not Available]	[Not Available]	[Not Available]	[Not Available]	[Not Available]	[Not Available]	[Not Available]	[Not Available]	[Not Available]	[Not Applicable]	[Not Available]	[Not Available]
661D7B4A-A2B2-4251-B464-292421665948	TCGA-K4-A6MB	TCGA-K4-A6MB-D64000	0ACB6707-63B4-4FDD-AAAC-70511B8F5519	41877	[Unknown]	[Not Available]	[Not Available]	[Not Available]	NO	[Not Available]	[Not Available]	[Not Available]	[Not Available]	[Not Available]	[Not Available]	[Not Available]	[Not Available]	[Not Available]	[Not Available]	[Not Available]	[Not Available]	[Not Available]	[Not Available]	[Not Available]	[Not Applicable]	[Not Available]	NO
AA14FFB4-A715-4636-8251-73D019DDDD8C	TCGA-K4-A83P	TCGA-K4-A83P-D70489	1BE668A8-CB1C-4D9C-A2B8-0993CA43A4D9	42053	carboplatinum	[Not Available]	Chemotherapy	[Not Available]	[Not Available]	[Not Available]	Clinical Progressive Disease	[Not Available]	[Not Available]	[Not Available]	[Not Available]	[Not Available]	[Not Available]	[Not Available]	[Not Available]	[Not Available]	[Not Available]	[Not Available]	[Not Available]	[Not Available]	[Not Applicable]	[Not Available]	NO
AA14FFB4-A715-4636-8251-73D019DDDD8C	TCGA-K4-A83P	TCGA-K4-A83P-D70495	D954A0C1-B175-485D-837F-4B0E004DB01A	42053	gemcitabine	[Not Available]	Chemotherapy	[Not Available]	[Not Available]	[Not Available]	Clinical Progressive Disease	[Not Available]	[Not Available]	[Not Available]	[Not Available]	[Not Available]	[Not Available]	[Not Available]	[Not Available]	[Not Available]	[Not Available]	[Not Available]	[Not Available]	[Not Available]	[Not Applicable]	[Not Available]	NO
383BF27A-9216-492E-B4BD-2B4EEF8278DE	TCGA-K4-AAQO	TCGA-K4-AAQO-D64606	2ABB2BC6-099E-4E45-9270-AD1FE8B8D172	41887	gemcitabine	[Not Available]	[Not Available]	120	NO	181	Partial Response	[Not Available]	[Not Available]	[Not Available]	[Not Available]	[Not Available]	[Not Available]	[Not Available]	[Not Available]	[Not Available]	[Not Available]	[Not Available]	[Not Available]	[Not Available]	[Not Applicable]	[Not Available]	NO
383BF27A-9216-492E-B4BD-2B4EEF8278DE	TCGA-K4-AAQO	TCGA-K4-AAQO-D64607	132A555E-0765-4E61-A452-ACC71978BE5E	41887	cisplatin	[Not Available]	[Not Available]	120	NO	181	Partial Response	[Not Available]	[Not Available]	[Not Available]	[Not Available]	[Not Available]	[Not Available]	[Not Available]	[Not Available]	[Not Available]	[Not Available]	[Not Available]	[Not Available]	[Not Available]	[Not Applicable]	[Not Available]	NO
D7AF7E2C-F742-46ED-814B-1967D7E8C2D2	TCGA-KQ-A41P	TCGA-KQ-A41P-D72534	D447E690-1351-4ED4-9FF8-FFBCDB320B4F	42198	Carboplatin	[Not Available]	Chemotherapy	189	NO	331	Partial Response	[Not Available]	[Not Available]	[Not Available]	[Not Available]	[Not Available]	[Not Available]	[Not Available]	[Not Available]	[Not Available]	[Not Available]	[Not Available]	[Not Available]	[Not Available]	[Not Applicable]	[Not Available]	NO
D7AF7E2C-F742-46ED-814B-1967D7E8C2D2	TCGA-KQ-A41P	TCGA-KQ-A41P-D72535	15643365-9F58-4E83-AF6D-8824F59E4EDD	42198	Gemcitabine	[Not Available]	Chemotherapy	189	NO	331	Partial Response	[Not Available]	[Not Available]	[Not Available]	[Not Available]	[Not Available]	[Not Available]	[Not Available]	[Not Available]	[Not Available]	[Not Available]	[Not Available]	[Not Available]	[Not Available]	[Not Applicable]	[Not Available]	NO
EC7FC492-53CC-4B71-A66A-1CEF1ADEBA33	TCGA-LT-A5Z6	TCGA-LT-A5Z6-D43759	92EF1CC6-534C-4021-ADF7-5DF2B386E56F	41428	Gemcitabine	[Not Available]	Chemotherapy	29	NO	166	Complete Response	[Not Available]	[Not Available]	[Not Available]	[Not Available]	[Not Available]	[Not Available]	[Not Available]	[Not Available]	[Not Available]	[Not Available]	[Not Available]	[Not Available]	[Not Available]	[Not Applicable]	[Not Available]	NO
EC7FC492-53CC-4B71-A66A-1CEF1ADEBA33	TCGA-LT-A5Z6	TCGA-LT-A5Z6-D45446	822C656A-0E82-4336-A8C3-5771FBBDC47D	41470	Cisplatin	[Not Available]	Chemotherapy	29	NO	166	Complete Response	[Not Available]	[Not Available]	[Not Available]	[Not Available]	[Not Available]	[Not Available]	[Not Available]	[Not Available]	[Not Available]	[Not Available]	[Not Available]	[Not Available]	[Not Available]	[Not Applicable]	[Not Available]	NO
7D198EE2-D80A-4759-804F-A7EF85971843	TCGA-SY-A9G5	TCGA-SY-A9G5-D66296	B16969E0-B6D0-45A5-BBE2-2BED7B62C63B	41920	gemcitabine	[Not Available]	Chemotherapy	83	NO	145	Complete Response	[Not Available]	[Not Available]	[Not Available]	[Not Available]	[Not Available]	[Not Available]	[Not Available]	[Not Available]	[Not Available]	[Not Available]	[Not Available]	[Not Available]	[Not Available]	[Not Applicable]	[Not Available]	NO
7D198EE2-D80A-4759-804F-A7EF85971843	TCGA-SY-A9G5	TCGA-SY-A9G5-D66297	5099B55A-B4B4-4D54-B510-43CBC090970D	41920	cisplatin	[Not Available]	Chemotherapy	83	NO	145	Complete Response	[Not Available]	[Not Available]	[Not Available]	[Not Available]	[Not Available]	[Not Available]	[Not Available]	[Not Available]	[Not Available]	[Not Available]	[Not Available]	[Not Available]	[Not Available]	[Not Applicable]	[Not Available]	NO
D46F7976-6061-4CA9-8294-6C215703662B	TCGA-UY-A78L	TCGA-UY-A78L-D68687	233EC6CE-DA51-400F-8878-827ECA237236	41983	Gemcitabine	[Not Available]	Chemotherapy	152	NO	232	Clinical Progressive Disease	[Not Available]	[Not Available]	[Not Available]	[Not Available]	[Not Available]	[Not Available]	[Not Available]	[Not Available]	[Not Available]	[Not Available]	[Not Available]	[Not Available]	[Not Available]	[Not Applicable]	[Not Available]	YES
D46F7976-6061-4CA9-8294-6C215703662B	TCGA-UY-A78L	TCGA-UY-A78L-D69856	0E39EA87-108E-4729-AE4A-09934E78A61C	42025	Cisplatnin	[Not Available]	Chemotherapy	152	NO	232	Clinical Progressive Disease	[Not Available]	[Not Available]	[Not Available]	[Not Available]	[Not Available]	[Not Available]	[Not Available]	[Not Available]	[Not Available]	[Not Available]	[Not Available]	[Not Available]	[Not Available]	[Not Applicable]	[Not Available]	YES
FE33E5E0-A54D-481A-897C-E32B4708DA69	TCGA-UY-A8OB	TCGA-UY-A8OB-D70404	69B088FE-1097-4781-BCC0-EF0EA698B9DC	42046	Gemcitabine	[Not Available]	Chemotherapy	[Not Available]	NO	[Not Available]	Complete Response	[Not Available]	[Not Available]	[Not Available]	[Not Available]	[Not Available]	[Not Available]	[Not Available]	[Not Available]	[Not Available]	[Not Available]	[Not Available]	[Not Available]	[Not Available]	[Not Applicable]	[Not Available]	NO
FE33E5E0-A54D-481A-897C-E32B4708DA69	TCGA-UY-A8OB	TCGA-UY-A8OB-D71221	75DB2664-316D-409E-BF69-FB0D747D9638	42086	Cisplatin	[Not Available]	Chemotherapy	[Not Available]	NO	[Not Available]	Complete Response	[Not Available]	[Not Available]	[Not Available]	[Not Available]	[Not Available]	[Not Available]	[Not Available]	[Not Available]	[Not Available]	[Not Available]	[Not Available]	[Not Available]	[Not Available]	[Not Applicable]	[Not Available]	NO
EED3908F-F1BD-4254-BCA8-BC1A7427E95C	TCGA-XF-A8HI	TCGA-XF-A8HI-D56265	A25AFABE-9CE2-4884-8B35-F3B678CF3ECE	41711	[Not Available]	[Not Available]	Chemotherapy	161	NO	544	Clinical Progressive Disease	[Not Available]	[Not Available]	[Not Available]	[Not Available]	[Not Available]	[Not Available]	[Not Available]	[Not Available]	[Not Available]	[Not Available]	[Not Available]	[Not Available]	[Not Available]	[Not Applicable]	[Not Available]	NO
B838A4DB-EF0A-4D88-A220-BF57E31E0B3C	TCGA-XF-A9SH	TCGA-XF-A9SH-D60614	7C8A6B39-2A32-46E1-AADF-5A6241BDE19F	41806	Halichondrin B	[Not Available]	Chemotherapy	625	NO	996	Stable Disease	[Not Available]	[Not Available]	[Not Available]	[Not Available]	[Not Available]	[Not Available]	[Not Available]	[Not Available]	[Not Available]	[Not Available]	[Not Available]	[Not Available]	[Not Available]	[Not Applicable]	[Not Available]	YES
B838A4DB-EF0A-4D88-A220-BF57E31E0B3C	TCGA-XF-A9SH	TCGA-XF-A9SH-D60615	5E4B3CA0-F30A-4AB4-92B0-21CE18C5F673	41806	Docetaxel	[Not Available]	Chemotherapy	1633	NO	1680	Clinical Progressive Disease	[Not Available]	[Not Available]	[Not Available]	[Not Available]	[Not Available]	[Not Available]	[Not Available]	[Not Available]	[Not Available]	[Not Available]	[Not Available]	[Not Available]	[Not Available]	[Not Applicable]	[Not Available]	YES
B838A4DB-EF0A-4D88-A220-BF57E31E0B3C	TCGA-XF-A9SH	TCGA-XF-A9SH-D60616	E6E517CD-69CD-47B1-A37C-3E391358760C	41806	Ifosfamide	[Not Available]	Chemotherapy	1759	NO	1782	Clinical Progressive Disease	[Not Available]	[Not Available]	[Not Available]	[Not Available]	[Not Available]	[Not Available]	[Not Available]	[Not Available]	[Not Available]	[Not Available]	[Not Available]	[Not Available]	[Not Available]	[Not Applicable]	[Not Available]	NO
B838A4DB-EF0A-4D88-A220-BF57E31E0B3C	TCGA-XF-A9SH	TCGA-XF-A9SH-D60617	69B4DD39-6085-4AD4-AF71-2BAD0CC5C38C	41806	Doxorubicin	[Not Available]	Chemotherapy	1759	NO	1782	Clinical Progressive Disease	[Not Available]	[Not Available]	[Not Available]	[Not Available]	[Not Available]	[Not Available]	[Not Available]	[Not Available]	[Not Available]	[Not Available]	[Not Available]	[Not Available]	[Not Available]	[Not Applicable]	[Not Available]	NO
B838A4DB-EF0A-4D88-A220-BF57E31E0B3C	TCGA-XF-A9SH	TCGA-XF-A9SH-D60618	DF017D1D-16C0-43F6-94AB-B00A20C21B55	41806	Mesna	[Not Available]	Ancillary	1759	NO	1782	Clinical Progressive Disease	[Not Available]	[Not Available]	[Not Available]	[Not Available]	[Not Available]	[Not Available]	[Not Available]	[Not Available]	[Not Available]	[Not Available]	[Not Available]	[Not Available]	[Not Available]	[Not Applicable]	[Not Available]	NO
03F588D6-832E-47D8-A9C4-AF6640A1A635	TCGA-XF-A9SK	TCGA-XF-A9SK-D56757	CA01F02D-27E1-4691-84DB-C85358D13EDE	41694	BCG, Intravesicular	[Not Available]	Immunotherapy	[Not Available]	NO	-368	Partial Response	[Not Available]	[Not Available]	[Not Available]	[Not Available]	[Not Available]	[Not Available]	[Not Available]	[Not Available]	[Not Available]	[Not Available]	[Not Available]	[Not Available]	[Not Available]	[Not Applicable]	[Not Available]	NO
03F588D6-832E-47D8-A9C4-AF6640A1A635	TCGA-XF-A9SK	TCGA-XF-A9SK-D59547	AFD80131-BB45-4B48-8FDA-D8DD17DB58E5	41876	Gemzar	[Not Available]	Chemotherapy	142	NO	304	Partial Response	[Not Available]	[Not Available]	[Not Available]	[Not Available]	[Not Available]	[Not Available]	[Not Available]	[Not Available]	[Not Available]	[Not Available]	[Not Available]	[Not Available]	[Not Available]	[Not Applicable]	[Not Available]	NO
03F588D6-832E-47D8-A9C4-AF6640A1A635	TCGA-XF-A9SK	TCGA-XF-A9SK-D59548	C5CAB0B3-D160-40EC-B953-DC062772B140	41876	Platinol	[Not Available]	Chemotherapy	142	NO	304	Partial Response	[Not Available]	[Not Available]	[Not Available]	[Not Available]	[Not Available]	[Not Available]	[Not Available]	[Not Available]	[Not Available]	[Not Available]	[Not Available]	[Not Available]	[Not Available]	[Not Applicable]	[Not Available]	NO
42BCF1A7-2F3A-4ED8-A41D-CDD67E65B928	TCGA-XF-A9SU	TCGA-XF-A9SU-D59904	BFE57565-B6DD-447B-81D7-F7D6FA898FCE	41806	Gemcitabine	[Not Available]	Chemotherapy	137	NO	137	Clinical Progressive Disease	[Not Available]	[Not Available]	[Not Available]	[Not Available]	[Not Available]	[Not Available]	[Not Available]	[Not Available]	[Not Available]	[Not Available]	[Not Available]	[Not Available]	[Not Available]	[Not Applicable]	[Not Available]	NO
42BCF1A7-2F3A-4ED8-A41D-CDD67E65B928	TCGA-XF-A9SU	TCGA-XF-A9SU-D59905	D6E029D5-9B39-43B5-A982-1DBEA353A1EE	41806	Cisplatin	[Not Available]	Chemotherapy	137	NO	137	Clinical Progressive Disease	[Not Available]	[Not Available]	[Not Available]	[Not Available]	[Not Available]	[Not Available]	[Not Available]	[Not Available]	[Not Available]	[Not Available]	[Not Available]	[Not Available]	[Not Available]	[Not Applicable]	[Not Available]	NO
CDFD86DB-15E2-4D38-A717-2207E8DE2D8F	TCGA-XF-A9SV	TCGA-XF-A9SV-D56790	596F516C-004B-4C0B-B076-4D3E4BAB175D	41690	BCG	[Not Available]	Immunotherapy	0	NO	0	Clinical Progressive Disease	[Not Available]	[Not Available]	[Not Available]	[Not Available]	[Not Available]	[Not Available]	[Not Available]	[Not Available]	[Not Available]	[Not Available]	[Not Available]	[Not Available]	[Not Available]	[Not Applicable]	[Not Available]	NO
CDFD86DB-15E2-4D38-A717-2207E8DE2D8F	TCGA-XF-A9SV	TCGA-XF-A9SV-D60792	DD1352CC-3227-4F0F-A511-88FD346D3CEF	41825	gemcitabine	[Not Available]	Chemotherapy	174	NO	208	Clinical Progressive Disease	[Not Available]	[Not Available]	[Not Available]	[Not Available]	[Not Available]	[Not Available]	[Not Available]	[Not Available]	[Not Available]	[Not Available]	[Not Available]	[Not Available]	[Not Available]	[Not Applicable]	[Not Available]	NO
CDFD86DB-15E2-4D38-A717-2207E8DE2D8F	TCGA-XF-A9SV	TCGA-XF-A9SV-D60793	20BA299F-7C25-4BC2-BB4F-565932294B6A	41825	Cisplatin	[Not Available]	Chemotherapy	174	NO	208	Clinical Progressive Disease	[Not Available]	[Not Available]	[Not Available]	[Not Available]	[Not Available]	[Not Available]	[Not Available]	[Not Available]	[Not Available]	[Not Available]	[Not Available]	[Not Available]	[Not Available]	[Not Applicable]	[Not Available]	NO
CDFD86DB-15E2-4D38-A717-2207E8DE2D8F	TCGA-XF-A9SV	TCGA-XF-A9SV-D60794	D5A60CFA-05F5-4600-BA8F-F5B8C3108D20	41825	SAHA/Vorinostat	[Not Available]	Chemotherapy	258	NO	342	Clinical Progressive Disease	[Not Available]	[Not Available]	[Not Available]	[Not Available]	[Not Available]	[Not Available]	[Not Available]	[Not Available]	[Not Available]	[Not Available]	[Not Available]	[Not Available]	[Not Available]	[Not Applicable]	[Not Available]	YES
A648D9BF-CF37-41FC-9515-E8F5AC85FCD4	TCGA-XF-A9SX	TCGA-XF-A9SX-D61323	33DFE922-C183-4518-A06C-6CB9DD506E92	41825	Gemcitabine	[Not Available]	Chemotherapy	136	NO	348	Clinical Progressive Disease	[Not Available]	[Not Available]	[Not Available]	[Not Available]	[Not Available]	[Not Available]	[Not Available]	[Not Available]	[Not Available]	[Not Available]	[Not Available]	[Not Available]	[Not Available]	[Not Applicable]	[Not Available]	NO
A648D9BF-CF37-41FC-9515-E8F5AC85FCD4	TCGA-XF-A9SX	TCGA-XF-A9SX-D61325	2B62B01D-0739-459F-A8CF-09AB969D0727	41825	Platinum	[Not Available]	Chemotherapy	136	NO	348	Clinical Progressive Disease	[Not Available]	[Not Available]	[Not Available]	[Not Available]	[Not Available]	[Not Available]	[Not Available]	[Not Available]	[Not Available]	[Not Available]	[Not Available]	[Not Available]	[Not Available]	[Not Applicable]	[Not Available]	NO
8A83F744-8469-41EF-A4CD-E983F849383F	TCGA-XF-A9SY	TCGA-XF-A9SY-D61329	9B51FD68-FAD7-4443-99BA-9C30ABC2158A	41825	Carboplatin	[Not Available]	Chemotherapy	199	NO	256	Clinical Progressive Disease	[Not Available]	[Not Available]	[Not Available]	[Not Available]	[Not Available]	[Not Available]	[Not Available]	[Not Available]	[Not Available]	[Not Available]	[Not Available]	[Not Available]	[Not Available]	[Not Applicable]	[Not Available]	NO
8A83F744-8469-41EF-A4CD-E983F849383F	TCGA-XF-A9SY	TCGA-XF-A9SY-D61330	FF865837-071F-4A5F-A0FE-293C5CD41B14	41825	Gemcitabine	[Not Available]	Chemotherapy	199	NO	256	Clinical Progressive Disease	[Not Available]	[Not Available]	[Not Available]	[Not Available]	[Not Available]	[Not Available]	[Not Available]	[Not Available]	[Not Available]	[Not Available]	[Not Available]	[Not Available]	[Not Available]	[Not Applicable]	[Not Available]	NO
DC321B92-7275-48C9-ADEB-7670DB3195EF	TCGA-XF-A9SZ	TCGA-XF-A9SZ-D61362	B5C1A628-866C-470D-BA8A-0F7C97FCC91D	41817	Gemcitabine	[Not Available]	Chemotherapy	97	NO	169	Complete Response	[Not Available]	[Not Available]	[Not Available]	[Not Available]	[Not Available]	[Not Available]	[Not Available]	[Not Available]	[Not Available]	[Not Available]	[Not Available]	[Not Available]	[Not Available]	[Not Applicable]	[Not Available]	NO
DC321B92-7275-48C9-ADEB-7670DB3195EF	TCGA-XF-A9SZ	TCGA-XF-A9SZ-D61363	4AF3BF48-56AA-4F54-B844-FEE9CA96906F	41817	Cisplatin	[Not Available]	Chemotherapy	97	NO	169	Complete Response	[Not Available]	[Not Available]	[Not Available]	[Not Available]	[Not Available]	[Not Available]	[Not Available]	[Not Available]	[Not Available]	[Not Available]	[Not Available]	[Not Available]	[Not Available]	[Not Applicable]	[Not Available]	NO
F9A03EAA-A228-429C-99C5-8E877379DB0F	TCGA-XF-A9T4	TCGA-XF-A9T4-D61598	8569E177-53CE-4F0A-A13B-A91033FBCA52	41821	Cisplatin	[Not Available]	Chemotherapy	158	NO	281	Partial Response	[Not Available]	[Not Available]	[Not Available]	[Not Available]	[Not Available]	[Not Available]	[Not Available]	[Not Available]	[Not Available]	[Not Available]	[Not Available]	[Not Available]	[Not Available]	[Not Applicable]	[Not Available]	NO
F9A03EAA-A228-429C-99C5-8E877379DB0F	TCGA-XF-A9T4	TCGA-XF-A9T4-D61599	37732A8A-3221-43E0-9005-D6DD476681B4	41821	Gemcitabine	[Not Available]	Chemotherapy	158	NO	281	Partial Response	[Not Available]	[Not Available]	[Not Available]	[Not Available]	[Not Available]	[Not Available]	[Not Available]	[Not Available]	[Not Available]	[Not Available]	[Not Available]	[Not Available]	[Not Available]	[Not Applicable]	[Not Available]	NO
F9A03EAA-A228-429C-99C5-8E877379DB0F	TCGA-XF-A9T4	TCGA-XF-A9T4-D61600	C7B176F7-AE11-4554-9D9E-BE4ACD7E4D05	41821	Ifosfamide	[Not Available]	Chemotherapy	402	NO	436	Clinical Progressive Disease	[Not Available]	[Not Available]	[Not Available]	[Not Available]	[Not Available]	[Not Available]	[Not Available]	[Not Available]	[Not Available]	[Not Available]	[Not Available]	[Not Available]	[Not Available]	[Not Applicable]	[Not Available]	NO
F9A03EAA-A228-429C-99C5-8E877379DB0F	TCGA-XF-A9T4	TCGA-XF-A9T4-D61601	4202EF5B-25B9-4985-A80C-D178F51C37CE	41821	Paclitaxel	[Not Available]	Chemotherapy	402	NO	436	Clinical Progressive Disease	[Not Available]	[Not Available]	[Not Available]	[Not Available]	[Not Available]	[Not Available]	[Not Available]	[Not Available]	[Not Available]	[Not Available]	[Not Available]	[Not Available]	[Not Available]	[Not Applicable]	[Not Available]	NO
F9A03EAA-A228-429C-99C5-8E877379DB0F	TCGA-XF-A9T4	TCGA-XF-A9T4-D61602	566FD975-165D-48C5-B55E-F799C2467205	41821	Cisplatin	[Not Available]	Chemotherapy	402	NO	436	Clinical Progressive Disease	[Not Available]	[Not Available]	[Not Available]	[Not Available]	[Not Available]	[Not Available]	[Not Available]	[Not Available]	[Not Available]	[Not Available]	[Not Available]	[Not Available]	[Not Available]	[Not Applicable]	[Not Available]	NO
F9A7AB94-70DF-4194-8102-66021D01DADD	TCGA-XF-A9T5	TCGA-XF-A9T5-D61658	5A0BF7D9-C1D3-40C8-A743-08C9DC439BFD	41822	Gemcitabine	[Not Available]	Chemotherapy	687	NO	757	Complete Response	[Not Available]	[Not Available]	[Not Available]	[Not Available]	[Not Available]	[Not Available]	[Not Available]	[Not Available]	[Not Available]	[Not Available]	[Not Available]	[Not Available]	[Not Available]	[Not Applicable]	[Not Available]	NO
F9A7AB94-70DF-4194-8102-66021D01DADD	TCGA-XF-A9T5	TCGA-XF-A9T5-D61661	4CD8075E-9FC3-4BC0-854E-7E1757A94428	41822	Cisplatin	[Not Available]	Chemotherapy	687	NO	757	Complete Response	[Not Available]	[Not Available]	[Not Available]	[Not Available]	[Not Available]	[Not Available]	[Not Available]	[Not Available]	[Not Available]	[Not Available]	[Not Available]	[Not Available]	[Not Available]	[Not Applicable]	[Not Available]	NO
C8388AC0-975D-4F1E-8324-8CABDC75738D	TCGA-XF-AAME	TCGA-XF-AAME-D62017	F30604A8-2DC5-41A4-94B1-ECCF7B8E8D50	41831	Carboplatin	[Not Available]	Chemotherapy	2569	NO	2569	Clinical Progressive Disease	[Not Available]	[Not Available]	[Not Available]	[Not Available]	[Not Available]	[Not Available]	[Not Available]	[Not Available]	[Not Available]	[Not Available]	[Not Available]	[Not Available]	[Not Available]	[Not Applicable]	[Not Available]	NO
C8388AC0-975D-4F1E-8324-8CABDC75738D	TCGA-XF-AAME	TCGA-XF-AAME-D62018	5C2FA8E7-E9CB-4A48-96B8-95A7693E491C	41831	Gemcitabine	[Not Available]	Chemotherapy	2500	NO	2543	Partial Response	[Not Available]	[Not Available]	[Not Available]	[Not Available]	[Not Available]	[Not Available]	[Not Available]	[Not Available]	[Not Available]	[Not Available]	[Not Available]	[Not Available]	[Not Available]	[Not Applicable]	[Not Available]	NO
C8388AC0-975D-4F1E-8324-8CABDC75738D	TCGA-XF-AAME	TCGA-XF-AAME-D62019	74172342-04F3-4F20-A105-7C8E9E7332EF	41831	Cisplatin	[Not Available]	Chemotherapy	2500	NO	2543	Partial Response	[Not Available]	[Not Available]	[Not Available]	[Not Available]	[Not Available]	[Not Available]	[Not Available]	[Not Available]	[Not Available]	[Not Available]	[Not Available]	[Not Available]	[Not Available]	[Not Applicable]	[Not Available]	NO
93FBE302-A2E0-4CF4-A638-312786F547C2	TCGA-XF-AAMF	TCGA-XF-AAMF-D62164	34818ACA-D38D-4BCB-AEB2-E0EE140B02F9	41832	Gemcitabine	[Not Available]	Chemotherapy	161	NO	274	Clinical Progressive Disease	[Not Available]	[Not Available]	[Not Available]	[Not Available]	[Not Available]	[Not Available]	[Not Available]	[Not Available]	[Not Available]	[Not Available]	[Not Available]	[Not Available]	[Not Available]	[Not Applicable]	[Not Available]	NO
93FBE302-A2E0-4CF4-A638-312786F547C2	TCGA-XF-AAMF	TCGA-XF-AAMF-D62165	B24DCE72-D14C-46B8-BDA3-F31C0BFC76E0	41832	Carboplatin	[Not Available]	Chemotherapy	161	NO	274	Clinical Progressive Disease	[Not Available]	[Not Available]	[Not Available]	[Not Available]	[Not Available]	[Not Available]	[Not Available]	[Not Available]	[Not Available]	[Not Available]	[Not Available]	[Not Available]	[Not Available]	[Not Applicable]	[Not Available]	NO
390A29FE-2CFD-43C4-A247-69E692763E17	TCGA-XF-AAMG	TCGA-XF-AAMG-D61740	0EFF6E6D-4AC0-42E3-BBAC-B0E7F4EA0976	41841	Cisplatin	[Not Available]	Chemotherapy	74	NO	151	Complete Response	[Not Available]	[Not Available]	[Not Available]	[Not Available]	[Not Available]	[Not Available]	[Not Available]	[Not Available]	[Not Available]	[Not Available]	[Not Available]	[Not Available]	[Not Available]	[Not Applicable]	[Not Available]	NO
390A29FE-2CFD-43C4-A247-69E692763E17	TCGA-XF-AAMG	TCGA-XF-AAMG-D61739	8B357F3E-0BE3-4DFF-86E8-14A7AB8F41DA	41841	Gemcitabine	[Not Available]	Chemotherapy	74	NO	151	Complete Response	[Not Available]	[Not Available]	[Not Available]	[Not Available]	[Not Available]	[Not Available]	[Not Available]	[Not Available]	[Not Available]	[Not Available]	[Not Available]	[Not Available]	[Not Available]	[Not Applicable]	[Not Available]	NO
8F10E006-531A-49AC-B51B-DF3FDCB20929	TCGA-XF-AAMJ	TCGA-XF-AAMJ-D62171	D68B731D-FAF0-437A-957F-045178B96A76	41832	Gemcitabine	[Not Available]	Chemotherapy	82	NO	143	Complete Response	[Not Available]	[Not Available]	[Not Available]	[Not Available]	[Not Available]	[Not Available]	[Not Available]	[Not Available]	[Not Available]	[Not Available]	[Not Available]	[Not Available]	[Not Available]	[Not Applicable]	[Not Available]	NO
8F10E006-531A-49AC-B51B-DF3FDCB20929	TCGA-XF-AAMJ	TCGA-XF-AAMJ-D62172	CDEADBEB-7461-4531-8F71-3CADA30D810F	41832	platinum	[Not Available]	Chemotherapy	82	NO	143	Complete Response	[Not Available]	[Not Available]	[Not Available]	[Not Available]	[Not Available]	[Not Available]	[Not Available]	[Not Available]	[Not Available]	[Not Available]	[Not Available]	[Not Available]	[Not Available]	[Not Applicable]	[Not Available]	NO
818F5A45-4DEB-49E4-9A73-55EF4269DE4C	TCGA-XF-AAMR	TCGA-XF-AAMR-D62176	DC0734AB-1A00-4F51-B45A-79BBC93ECFD4	41833	Cisplatin	[Not Available]	Chemotherapy	119	NO	192	Complete Response	[Not Available]	[Not Available]	[Not Available]	[Not Available]	[Not Available]	[Not Available]	[Not Available]	[Not Available]	[Not Available]	[Not Available]	[Not Available]	[Not Available]	[Not Available]	[Not Applicable]	[Not Available]	NO
818F5A45-4DEB-49E4-9A73-55EF4269DE4C	TCGA-XF-AAMR	TCGA-XF-AAMR-D62177	9D981374-EAE9-42D6-A165-E82DAB559C5C	41833	Gemcitabine	[Not Available]	Chemotherapy	119	NO	192	Complete Response	[Not Available]	[Not Available]	[Not Available]	[Not Available]	[Not Available]	[Not Available]	[Not Available]	[Not Available]	[Not Available]	[Not Available]	[Not Available]	[Not Available]	[Not Available]	[Not Applicable]	[Not Available]	NO
9D2B19EB-BD61-490E-982B-FADF2C4AADF7	TCGA-XF-AAMY	TCGA-XF-AAMY-D62220	A1380301-5B3D-4542-A8FE-04A142DA42A0	41835	Gemzar	[Not Available]	Chemotherapy	669	NO	853	Complete Response	[Not Available]	[Not Available]	[Not Available]	[Not Available]	[Not Available]	[Not Available]	[Not Available]	[Not Available]	[Not Available]	[Not Available]	[Not Available]	[Not Available]	[Not Available]	[Not Applicable]	[Not Available]	NO
9D2B19EB-BD61-490E-982B-FADF2C4AADF7	TCGA-XF-AAMY	TCGA-XF-AAMY-D62221	A03EFBED-7200-459C-BD63-8118F79AA905	41835	Carboplatin	[Not Available]	Chemotherapy	671	NO	853	Complete Response	[Not Available]	[Not Available]	[Not Available]	[Not Available]	[Not Available]	[Not Available]	[Not Available]	[Not Available]	[Not Available]	[Not Available]	[Not Available]	[Not Available]	[Not Available]	[Not Applicable]	[Not Available]	NO
ED36D054-53C4-465C-BD84-6EC5227097BF	TCGA-XF-AAMZ	TCGA-XF-AAMZ-D62345	FEC38DE9-1E37-4277-B128-DE87B74E792C	41835	BCG	[Not Available]	Immunotherapy	0	NO	0	Clinical Progressive Disease	[Not Available]	[Not Available]	[Not Available]	[Not Available]	[Not Available]	[Not Available]	[Not Available]	[Not Available]	[Not Available]	[Not Available]	[Not Available]	[Not Available]	[Not Available]	[Not Applicable]	[Not Available]	NO
E7E95597-EF88-4442-8C01-8D633822E7B5	TCGA-XF-AAN0	TCGA-XF-AAN0-D62515	31A1CF90-2836-422A-A78F-40F78E13C639	41839	Cisplatin	[Not Available]	Chemotherapy	53	NO	53	[Unknown]	[Not Available]	[Not Available]	[Not Available]	[Not Available]	[Not Available]	[Not Available]	[Not Available]	[Not Available]	[Not Available]	[Not Available]	[Not Available]	[Not Available]	[Not Available]	[Not Applicable]	[Not Available]	NO
E7E95597-EF88-4442-8C01-8D633822E7B5	TCGA-XF-AAN0	TCGA-XF-AAN0-D62516	00007185-662F-4AF9-B90F-B73DEDEAE8A7	41839	Pacitaxol	[Not Available]	Chemotherapy	53	NO	175	Complete Response	[Not Available]	[Not Available]	[Not Available]	[Not Available]	[Not Available]	[Not Available]	[Not Available]	[Not Available]	[Not Available]	[Not Available]	[Not Available]	[Not Available]	[Not Available]	[Not Applicable]	[Not Available]	NO
E7E95597-EF88-4442-8C01-8D633822E7B5	TCGA-XF-AAN0	TCGA-XF-AAN0-D62517	93A46A11-39E8-4593-AE3F-4AB50B3E623D	41839	Gemzar	[Not Available]	Chemotherapy	53	NO	175	Complete Response	[Not Available]	[Not Available]	[Not Available]	[Not Available]	[Not Available]	[Not Available]	[Not Available]	[Not Available]	[Not Available]	[Not Available]	[Not Available]	[Not Available]	[Not Available]	[Not Applicable]	[Not Available]	NO
E7E95597-EF88-4442-8C01-8D633822E7B5	TCGA-XF-AAN0	TCGA-XF-AAN0-D62518	6C3388FA-B1D4-4315-BE94-CC4E39FAB53E	41839	Halichondrin	Anti-tubulin agent	Chemotherapy	614	NO	866	Partial Response	[Not Available]	[Not Available]	[Not Available]	[Not Available]	[Not Available]	[Not Available]	[Not Available]	[Not Available]	[Not Available]	[Not Available]	[Not Available]	[Not Available]	[Not Available]	[Not Applicable]	[Not Available]	YES
E7E95597-EF88-4442-8C01-8D633822E7B5	TCGA-XF-AAN0	TCGA-XF-AAN0-D62519	B7F6E64F-1BB2-4388-AABF-F62AB860C455	41839	Ifosfamide	[Not Available]	Chemotherapy	898	NO	1052	Partial Response	[Not Available]	[Not Available]	[Not Available]	[Not Available]	[Not Available]	[Not Available]	[Not Available]	[Not Available]	[Not Available]	[Not Available]	[Not Available]	[Not Available]	[Not Available]	[Not Applicable]	[Not Available]	NO
E7E95597-EF88-4442-8C01-8D633822E7B5	TCGA-XF-AAN0	TCGA-XF-AAN0-D62520	535127D6-B422-4608-A7D1-1B0ED7D63611	41839	Taxol	[Not Available]	Chemotherapy	898	NO	1052	Partial Response	[Not Available]	[Not Available]	[Not Available]	[Not Available]	[Not Available]	[Not Available]	[Not Available]	[Not Available]	[Not Available]	[Not Available]	[Not Available]	[Not Available]	[Not Available]	[Not Applicable]	[Not Available]	NO
E7E95597-EF88-4442-8C01-8D633822E7B5	TCGA-XF-AAN0	TCGA-XF-AAN0-D62521	60FD150C-836A-4098-905F-CB879F56DF75	41839	Cisplatin	[Not Available]	Chemotherapy	898	NO	1052	Partial Response	[Not Available]	[Not Available]	[Not Available]	[Not Available]	[Not Available]	[Not Available]	[Not Available]	[Not Available]	[Not Available]	[Not Available]	[Not Available]	[Not Available]	[Not Available]	[Not Applicable]	[Not Available]	NO
E7E95597-EF88-4442-8C01-8D633822E7B5	TCGA-XF-AAN0	TCGA-XF-AAN0-D62522	BA0FAC90-B83B-4B17-9C03-35C0198A3273	41839	Adriamycin (doxorubicin)	[Not Available]	Chemotherapy	1094	NO	1136	Partial Response	[Not Available]	[Not Available]	[Not Available]	[Not Available]	[Not Available]	[Not Available]	[Not Available]	[Not Available]	[Not Available]	[Not Available]	[Not Available]	[Not Available]	[Not Available]	[Not Applicable]	[Not Available]	NO
E7E95597-EF88-4442-8C01-8D633822E7B5	TCGA-XF-AAN0	TCGA-XF-AAN0-D62523	BB3FECDF-1F45-42B9-BC18-242AB337CFE0	41839	Gemcitabine	[Not Available]	Chemotherapy	1094	NO	1136	Partial Response	[Not Available]	[Not Available]	[Not Available]	[Not Available]	[Not Available]	[Not Available]	[Not Available]	[Not Available]	[Not Available]	[Not Available]	[Not Available]	[Not Available]	[Not Available]	[Not Applicable]	[Not Available]	NO
E7E95597-EF88-4442-8C01-8D633822E7B5	TCGA-XF-AAN0	TCGA-XF-AAN0-D62524	F0FF819C-FA2C-4E7B-A1CA-8CD498BD3371	41839	Adriamycin (doxorubicin)	[Not Available]	Chemotherapy	1265	NO	1318	Partial Response	[Not Available]	[Not Available]	[Not Available]	[Not Available]	[Not Available]	[Not Available]	[Not Available]	[Not Available]	[Not Available]	[Not Available]	[Not Available]	[Not Available]	[Not Available]	[Not Applicable]	[Not Available]	NO
E7E95597-EF88-4442-8C01-8D633822E7B5	TCGA-XF-AAN0	TCGA-XF-AAN0-D62525	2A7E98EA-34FF-45BB-BB07-D816EF52D85B	41839	Gemcitabine	[Not Available]	Chemotherapy	1265	NO	1318	Partial Response	[Not Available]	[Not Available]	[Not Available]	[Not Available]	[Not Available]	[Not Available]	[Not Available]	[Not Available]	[Not Available]	[Not Available]	[Not Available]	[Not Available]	[Not Available]	[Not Applicable]	[Not Available]	NO
E7E95597-EF88-4442-8C01-8D633822E7B5	TCGA-XF-AAN0	TCGA-XF-AAN0-D62526	D1BB434A-F94E-4706-A788-71D092772679	41839	Gemcitabine	[Not Available]	Chemotherapy	1423	NO	1486	Partial Response	[Not Available]	[Not Available]	[Not Available]	[Not Available]	[Not Available]	[Not Available]	[Not Available]	[Not Available]	[Not Available]	[Not Available]	[Not Available]	[Not Available]	[Not Available]	[Not Applicable]	[Not Available]	NO
E7E95597-EF88-4442-8C01-8D633822E7B5	TCGA-XF-AAN0	TCGA-XF-AAN0-D62527	4E2AD69A-535F-4040-B362-1FE4451470F1	41839	Adriamycin (doxorubicin)	[Not Available]	Chemotherapy	1465	NO	1486	Partial Response	[Not Available]	[Not Available]	[Not Available]	[Not Available]	[Not Available]	[Not Available]	[Not Available]	[Not Available]	[Not Available]	[Not Available]	[Not Available]	[Not Available]	[Not Available]	[Not Applicable]	[Not Available]	NO
E7E95597-EF88-4442-8C01-8D633822E7B5	TCGA-XF-AAN0	TCGA-XF-AAN0-D62528	BF52CAD0-17AF-465D-B6B0-3E4368D6A4FD	41839	Gemcitabine	[Not Available]	Chemotherapy	1598	NO	1598	Clinical Progressive Disease	[Not Available]	[Not Available]	[Not Available]	[Not Available]	[Not Available]	[Not Available]	[Not Available]	[Not Available]	[Not Available]	[Not Available]	[Not Available]	[Not Available]	[Not Available]	[Not Applicable]	[Not Available]	NO
E7E95597-EF88-4442-8C01-8D633822E7B5	TCGA-XF-AAN0	TCGA-XF-AAN0-D62529	226B95EA-5675-4BA5-A592-3FD8A86E53C5	41839	Adriamycin (doxorubicin)	[Not Available]	Chemotherapy	1598	NO	1598	Clinical Progressive Disease	[Not Available]	[Not Available]	[Not Available]	[Not Available]	[Not Available]	[Not Available]	[Not Available]	[Not Available]	[Not Available]	[Not Available]	[Not Available]	[Not Available]	[Not Available]	[Not Applicable]	[Not Available]	NO
E7E95597-EF88-4442-8C01-8D633822E7B5	TCGA-XF-AAN0	TCGA-XF-AAN0-D62530	1E22652B-7F6C-469D-BFC7-4AE593AAEEA0	41839	Temsirolimus	mTOR inhibitor	Chemotherapy	1703	NO	1703	[Unknown]	[Not Available]	[Not Available]	[Not Available]	[Not Available]	[Not Available]	[Not Available]	[Not Available]	[Not Available]	[Not Available]	[Not Available]	[Not Available]	[Not Available]	[Not Available]	[Not Applicable]	[Not Available]	YES
E7E95597-EF88-4442-8C01-8D633822E7B5	TCGA-XF-AAN0	TCGA-XF-AAN0-D62531	6B5260D5-8811-491D-A355-746EC69DD098	41839	Vinorelbine	anti-mitotic, vinca alkaloid	Chemotherapy	1703	NO	1703	[Unknown]	[Not Available]	[Not Available]	[Not Available]	[Not Available]	[Not Available]	[Not Available]	[Not Available]	[Not Available]	[Not Available]	[Not Available]	[Not Available]	[Not Available]	[Not Available]	[Not Applicable]	[Not Available]	YES
5378F375-AA04-4ECA-BC35-190B3EFB52BC	TCGA-XF-AAN1	TCGA-XF-AAN1-D62347	A9E44A74-1D24-42CF-B7E4-45E5EE58D785	41836	BCG	[Not Available]	Immunotherapy	0	NO	0	Partial Response	[Not Available]	[Not Available]	[Not Available]	[Not Available]	[Not Available]	[Not Available]	[Not Available]	[Not Available]	[Not Available]	[Not Available]	[Not Available]	[Not Available]	[Not Available]	[Not Applicable]	[Not Available]	NO
5378F375-AA04-4ECA-BC35-190B3EFB52BC	TCGA-XF-AAN1	TCGA-XF-AAN1-D62348	31A09893-A09C-4BE3-A64A-11D2D283BACC	41836	BCG	[Not Available]	Immunotherapy	0	NO	0	Clinical Progressive Disease	[Not Available]	[Not Available]	[Not Available]	[Not Available]	[Not Available]	[Not Available]	[Not Available]	[Not Available]	[Not Available]	[Not Available]	[Not Available]	[Not Available]	[Not Available]	[Not Applicable]	[Not Available]	NO
24AD2168-B25A-4DE8-A021-DFE1C74FCC6E	TCGA-XF-AAN3	TCGA-XF-AAN3-D62344	D4FB8933-FBBE-4CAB-A174-BC166465ECC7	41840	Cisplatin	[Not Available]	Chemotherapy	121	NO	142	Complete Response	[Not Available]	[Not Available]	[Not Available]	[Not Available]	[Not Available]	[Not Available]	[Not Available]	[Not Available]	[Not Available]	[Not Available]	[Not Available]	[Not Available]	[Not Available]	[Not Applicable]	[Not Available]	NO
24AD2168-B25A-4DE8-A021-DFE1C74FCC6E	TCGA-XF-AAN3	TCGA-XF-AAN3-D62538	DEB2649C-47A3-4709-A79E-3DBDCEEF801D	41840	Gemcitabine	[Not Available]	Chemotherapy	121	NO	142	Complete Response	[Not Available]	[Not Available]	[Not Available]	[Not Available]	[Not Available]	[Not Available]	[Not Available]	[Not Available]	[Not Available]	[Not Available]	[Not Available]	[Not Available]	[Not Available]	[Not Applicable]	[Not Available]	NO
C1591625-E794-4155-8AE4-B74D6264659F	TCGA-XF-AAN5	TCGA-XF-AAN5-D62542	DD5FBE8B-3A35-44F8-8014-02334A3FACCA	41840	Cisplatin	[Not Available]	Chemotherapy	127	NO	211	Complete Response	[Not Available]	[Not Available]	[Not Available]	[Not Available]	[Not Available]	[Not Available]	[Not Available]	[Not Available]	[Not Available]	[Not Available]	[Not Available]	[Not Available]	[Not Available]	[Not Applicable]	[Not Available]	NO
C1591625-E794-4155-8AE4-B74D6264659F	TCGA-XF-AAN5	TCGA-XF-AAN5-D62543	9A823C6E-A86F-4A1C-A542-03795247A7A9	41840	Gemcitabine	[Not Available]	Chemotherapy	127	NO	211	Complete Response	[Not Available]	[Not Available]	[Not Available]	[Not Available]	[Not Available]	[Not Available]	[Not Available]	[Not Available]	[Not Available]	[Not Available]	[Not Available]	[Not Available]	[Not Available]	[Not Applicable]	[Not Available]	NO
9D7FBDEB-EA3D-4E07-8527-23C5997D77CF	TCGA-XF-AAN7	TCGA-XF-AAN7-D62544	85C213D0-980A-474E-872A-1C13921AF1F4	41841	Cisplatin	[Not Available]	Chemotherapy	162	NO	200	Partial Response	[Not Available]	[Not Available]	[Not Available]	[Not Available]	[Not Available]	[Not Available]	[Not Available]	[Not Available]	[Not Available]	[Not Available]	[Not Available]	[Not Available]	[Not Available]	[Not Applicable]	[Not Available]	NO
9D7FBDEB-EA3D-4E07-8527-23C5997D77CF	TCGA-XF-AAN7	TCGA-XF-AAN7-D62545	9182B031-3872-486A-B137-38E2A151FF89	41841	Gemcitabine	[Not Available]	Chemotherapy	162	NO	200	Partial Response	[Not Available]	[Not Available]	[Not Available]	[Not Available]	[Not Available]	[Not Available]	[Not Available]	[Not Available]	[Not Available]	[Not Available]	[Not Available]	[Not Available]	[Not Available]	[Not Applicable]	[Not Available]	NO
9D7FBDEB-EA3D-4E07-8527-23C5997D77CF	TCGA-XF-AAN7	TCGA-XF-AAN7-D62546	F3AB0FF8-2D1F-47EB-83FA-09CF13D375EF	41841	Ifosfamide	[Not Available]	Chemotherapy	351	NO	374	Clinical Progressive Disease	[Not Available]	[Not Available]	[Not Available]	[Not Available]	[Not Available]	[Not Available]	[Not Available]	[Not Available]	[Not Available]	[Not Available]	[Not Available]	[Not Available]	[Not Available]	[Not Applicable]	[Not Available]	NO
9D7FBDEB-EA3D-4E07-8527-23C5997D77CF	TCGA-XF-AAN7	TCGA-XF-AAN7-D62547	76A9D3F2-9A8E-4A07-8BA5-45DAC66F7D5A	41841	Paclitaxel	[Not Available]	Chemotherapy	0	NO	9	Stable Disease	[Not Available]	[Not Available]	[Not Available]	[Not Available]	[Not Available]	[Not Available]	[Not Available]	[Not Available]	[Not Available]	[Not Available]	[Not Available]	[Not Available]	[Not Available]	[Not Applicable]	[Not Available]	NO
9D7FBDEB-EA3D-4E07-8527-23C5997D77CF	TCGA-XF-AAN7	TCGA-XF-AAN7-D62548	CF060018-E3F7-45BA-8407-8CF590D28DD6	41841	Cisplatin	[Not Available]	Chemotherapy	0	NO	9	Clinical Progressive Disease	[Not Available]	[Not Available]	[Not Available]	[Not Available]	[Not Available]	[Not Available]	[Not Available]	[Not Available]	[Not Available]	[Not Available]	[Not Available]	[Not Available]	[Not Available]	[Not Applicable]	[Not Available]	NO
9D7FBDEB-EA3D-4E07-8527-23C5997D77CF	TCGA-XF-AAN7	TCGA-XF-AAN7-D62549	0DBB730F-938A-4675-A8DE-8575ACA21C6A	41841	Docetaxel +/- Zactima	Blinded: Zactima or Placebo. Zactima is a kinase inhibitor	Chemotherapy	399	NO	442	Clinical Progressive Disease	[Not Available]	[Not Available]	[Not Available]	[Not Available]	[Not Available]	[Not Available]	[Not Available]	[Not Available]	[Not Available]	[Not Available]	[Not Available]	[Not Available]	[Not Available]	[Not Applicable]	[Not Available]	YES
95520295-90D3-4B4E-86B6-4BD856723315	TCGA-YC-A89H	TCGA-YC-A89H-D66948	9F434C9E-E3D8-4C44-85B2-098F5CAB7AC7	41954	cisplatin	[Not Available]	Chemotherapy	35	NO	83	Complete Response	[Not Available]	[Not Available]	[Not Available]	[Not Available]	[Not Available]	[Not Available]	[Not Available]	[Not Available]	[Not Available]	[Not Available]	[Not Available]	[Not Available]	[Not Available]	[Not Applicable]	[Not Available]	NO
95520295-90D3-4B4E-86B6-4BD856723315	TCGA-YC-A89H	TCGA-YC-A89H-D66947	8485E45C-7B44-420A-892F-E94F0B86A2A5	41954	Gemzar	[Not Available]	Chemotherapy	35	NO	83	Complete Response	[Not Available]	[Not Available]	[Not Available]	[Not Available]	[Not Available]	[Not Available]	[Not Available]	[Not Available]	[Not Available]	[Not Available]	[Not Available]	[Not Available]	[Not Available]	[Not Applicable]	[Not Available]	NO
661967E5-94B3-4F98-9402-6AB137893C16	TCGA-YF-AA3L	TCGA-YF-AA3L-D59724	B810C98A-9764-437A-BFDA-A4CB6A37EEF9	41782	Cisplatin	[Not Available]	Chemotherapy	215	YES	[Not Available]	[Not Applicable]	[Not Available]	[Not Available]	[Not Available]	[Not Available]	[Not Available]	[Not Available]	[Not Available]	[Not Available]	[Not Available]	[Not Available]	[Not Available]	[Not Available]	[Not Available]	[Not Applicable]	[Not Available]	NO
661967E5-94B3-4F98-9402-6AB137893C16	TCGA-YF-AA3L	TCGA-YF-AA3L-D59725	4AF60913-699B-42B6-B918-1930F7671B04	41782	Gemcitabine	[Not Available]	Chemotherapy	214	YES	[Not Available]	[Not Applicable]	[Not Available]	[Not Available]	[Not Available]	[Not Available]	[Not Available]	[Not Available]	[Not Available]	[Not Available]	[Not Available]	[Not Available]	[Not Available]	[Not Available]	[Not Available]	[Not Applicable]	[Not Available]	NO
CCD65BC8-82EF-453E-B4BC-A005CC2262D5	TCGA-ZF-AA4V	TCGA-ZF-AA4V-D72083	ED9CC992-A9F2-41F2-9711-1747A3A1F37E	42104	Gemcitabine and Cisplatin	[Not Available]	Chemotherapy	202	NO	265	Complete Response	[Not Available]	[Not Available]	[Not Available]	[Not Available]	[Not Available]	[Not Available]	[Not Available]	[Not Available]	[Not Available]	[Not Available]	[Not Available]	[Not Available]	[Not Available]	[Not Applicable]	[Not Available]	NO
1029514B-A32C-4C43-A440-A5BA2709F717	TCGA-ZF-AA51	TCGA-ZF-AA51-D72091	785199D4-90BF-40CE-AEAB-A5EA5953AAA3	42104	Gemcitabine	[Not Available]	Chemotherapy	69	NO	148	Complete Response	[Not Available]	[Not Available]	[Not Available]	[Not Available]	[Not Available]	[Not Available]	[Not Available]	[Not Available]	[Not Available]	[Not Available]	[Not Available]	[Not Available]	[Not Available]	[Not Applicable]	[Not Available]	NO
1029514B-A32C-4C43-A440-A5BA2709F717	TCGA-ZF-AA51	TCGA-ZF-AA51-D72092	097FAF51-5B92-4A4C-940C-73BE0DA86F74	42104	Cisplatin	[Not Available]	Chemotherapy	69	NO	148	Complete Response	[Not Available]	[Not Available]	[Not Available]	[Not Available]	[Not Available]	[Not Available]	[Not Available]	[Not Available]	[Not Available]	[Not Available]	[Not Available]	[Not Available]	[Not Available]	[Not Applicable]	[Not Available]	NO
92C6856A-B26F-4512-BBB1-8A8AFF4636AB	TCGA-ZF-AA53	TCGA-ZF-AA53-D72088	C1E16CF1-0677-4402-B05C-6A1FC943E0D5	42104	Gemcitabine	[Not Available]	Chemotherapy	68	NO	166	Complete Response	[Not Available]	[Not Available]	[Not Available]	[Not Available]	[Not Available]	[Not Available]	[Not Available]	[Not Available]	[Not Available]	[Not Available]	[Not Available]	[Not Available]	[Not Available]	[Not Applicable]	[Not Available]	NO
92C6856A-B26F-4512-BBB1-8A8AFF4636AB	TCGA-ZF-AA53	TCGA-ZF-AA53-D72089	348A86EE-A088-45D5-BF2B-ABE4D6526C42	42104	Cisplatin	[Not Available]	Chemotherapy	68	NO	166	Complete Response	[Not Available]	[Not Available]	[Not Available]	[Not Available]	[Not Available]	[Not Available]	[Not Available]	[Not Available]	[Not Available]	[Not Available]	[Not Available]	[Not Available]	[Not Available]	[Not Applicable]	[Not Available]	NO
0DA6502C-058D-47F5-9996-8AA1D511D7E4	TCGA-ZF-AA58	TCGA-ZF-AA58-D72102	0DAABAAD-5EF1-47DF-9196-94BAEB18E3D5	42107	Gemcitabine	[Not Available]	Chemotherapy	166	NO	[Not Available]	Complete Response	[Not Available]	[Not Available]	[Not Available]	[Not Available]	[Not Available]	[Not Available]	[Not Available]	[Not Available]	[Not Available]	[Not Available]	[Not Available]	[Not Available]	[Not Available]	[Not Applicable]	[Not Available]	NO
0DA6502C-058D-47F5-9996-8AA1D511D7E4	TCGA-ZF-AA58	TCGA-ZF-AA58-D72103	907B197A-9F12-421F-986E-019634FFD53B	42107	Cisplatin	[Not Available]	Chemotherapy	166	NO	[Not Available]	Complete Response	[Not Available]	[Not Available]	[Not Available]	[Not Available]	[Not Available]	[Not Available]	[Not Available]	[Not Available]	[Not Available]	[Not Available]	[Not Available]	[Not Available]	[Not Available]	[Not Applicable]	[Not Available]	NO
04477379-6C51-45D9-B9B9-D05D53B53945	TCGA-ZF-AA5H	TCGA-ZF-AA5H-D72105	9182BB2E-2590-4004-A0E1-0F826DC256B8	42107	Gemcitabine	[Not Available]	Chemotherapy	135	NO	177	Clinical Progressive Disease	[Not Available]	[Not Available]	[Not Available]	[Not Available]	[Not Available]	[Not Available]	[Not Available]	[Not Available]	[Not Available]	[Not Available]	[Not Available]	[Not Available]	[Not Available]	[Not Applicable]	[Not Available]	NO
04477379-6C51-45D9-B9B9-D05D53B53945	TCGA-ZF-AA5H	TCGA-ZF-AA5H-D72106	CAB786E1-619B-4568-A424-698490997C7B	42107	Cisplatin	[Not Available]	Chemotherapy	135	NO	177	Clinical Progressive Disease	[Not Available]	[Not Available]	[Not Available]	[Not Available]	[Not Available]	[Not Available]	[Not Available]	[Not Available]	[Not Available]	[Not Available]	[Not Available]	[Not Available]	[Not Available]	[Not Applicable]	[Not Available]	NO

## Sheet: KIRC
bcr_patient_uuid	bcr_patient_barcode	bcr_drug_barcode	bcr_drug_uuid	form_completion_date	pharmaceutical_therapy_drug_name	clinical_trial_drug_classification	pharmaceutical_therapy_type	pharmaceutical_tx_started_days_to	pharmaceutical_tx_ongoing_indicator	pharmaceutical_tx_ended_days_to	treatment_best_response	days_to_stem_cell_transplantation	pharm_regimen	pharm_regimen_other	pharma_adjuvant_cycles_count	pharma_type_other	pharmaceutical_tx_dose_units	pharmaceutical_tx_total_dose_units	prescribed_dose	regimen_number	route_of_administration	stem_cell_transplantation	stem_cell_transplantation_type	therapy_regimen	therapy_regimen_other	total_dose	tx_on_clinical_trial
bcr_patient_uuid	bcr_patient_barcode	bcr_drug_barcode	bcr_drug_uuid	form_completion_date	drug_name	clinical_trail_drug_classification	therapy_type	days_to_drug_therapy_start	therapy_ongoing	days_to_drug_therapy_end	measure_of_response	days_to_stem_cell_transplantation	pharm_regimen	pharm_regimen_other	number_cycles	therapy_type_notes	prescribed_dose_units	total_dose_units	prescribed_dose	regimen_number	route_of_administration	stem_cell_transplantation	stem_cell_transplantation_type	regimen_indication	regimen_indication_notes	total_dose	tx_on_clinical_trial
CDE_ID:	CDE_ID:2003301	CDE_ID:	CDE_ID:	CDE_ID:	CDE_ID:2975232	CDE_ID:3378323	CDE_ID:2793530	CDE_ID:3392465	CDE_ID:3103479	CDE_ID:3392470	CDE_ID:2857291	CDE_ID:3414613	CDE_ID:3366758	CDE_ID:3366930	CDE_ID:62590	CDE_ID:2001762	CDE_ID:3065815	CDE_ID:3088785	CDE_ID:2184728	CDE_ID:2744948	CDE_ID:2003586	CDE_ID:3090688	CDE_ID:2730901	CDE_ID:2793511	CDE_ID:2793516	CDE_ID:1515	CDE_ID:3925111
8ee720b5-6f3a-4921-85ab-70e75c0835b0	TCGA-A3-3317	TCGA-A3-3317-D1484	7e3935a4-8f96-406a-a319-7377608652fa	40311	Sorafenib	[Not Available]	Targeted Molecular therapy	605	NO	886	[Not Available]	[Not Available]	[Not Available]	[Not Available]	[Not Available]	[Not Available]	mg	[Not Available]	800	[Not Available]	PO	[Not Available]	[Not Available]	RECURRENCE	[Not Applicable]	[Not Available]	[Not Available]
8ee720b5-6f3a-4921-85ab-70e75c0835b0	TCGA-A3-3317	TCGA-A3-3317-D1485	e64308cc-327e-4629-94e4-c6c056787f2b	40311	Interferon Alpha	[Not Available]	Immunotherapy	605	NO	886	[Not Available]	[Not Available]	[Not Available]	[Not Available]	[Not Available]	[Not Available]	m[iU]	[Not Available]	0.5	[Not Available]	SC	[Not Available]	[Not Available]	RECURRENCE	[Not Applicable]	[Not Available]	[Not Available]
3372a7d2-79cb-4cf0-9a7e-fe1a6b205daa	TCGA-A3-3347	TCGA-A3-3347-D4931	c055dcd8-9968-40c8-9107-059cf2adea95	40433	Perifosine	[Not Available]	Targeted Molecular therapy	1097	NO	[Not Available]	[Not Available]	[Not Available]	[Not Available]	[Not Available]	[Not Available]	[Not Available]	[Not Available]	[Not Available]	[Not Available]	2	PO	[Not Available]	[Not Available]	PROGRESSION	[Not Applicable]	[Not Available]	[Not Available]
3372a7d2-79cb-4cf0-9a7e-fe1a6b205daa	TCGA-A3-3347	TCGA-A3-3347-D4930	2610bbd4-b2a1-4e02-bf42-3b575f94f763	40433	Sorafenib	[Not Available]	Targeted Molecular therapy	[Not Available]	NO	[Not Available]	[Not Available]	[Not Available]	[Not Available]	[Not Available]	[Not Available]	[Not Available]	[Not Available]	[Not Available]	[Not Available]	1	PO	[Not Available]	[Not Available]	ADJUVANT	[Not Applicable]	[Not Available]	[Not Available]
c5265ca6-2cb5-406d-a635-c4c783561107	TCGA-AK-3426	TCGA-AK-3426-D4313	3ebcad24-5a0f-4565-9401-f3ebf8fefad7	40492	Interferon	[Not Available]	Immunotherapy	465	NO	522	[Not Available]	[Not Available]	[Not Available]	[Not Available]	[Not Available]	[Not Available]	[Not Available]	[Not Available]	3	1	SC	[Not Available]	[Not Available]	RECURRENCE	[Not Applicable]	[Not Available]	[Not Available]
b2feca3f-8602-4a30-92bf-958ab2a2bd5d	TCGA-AK-3436	TCGA-AK-3436-D4346	200c01cf-2051-46d4-a755-4b291b488e77	40494	Sutent	[Not Available]	Chemotherapy	76	YES	[Not Available]	[Not Available]	[Not Available]	[Not Available]	[Not Available]	[Not Available]	[Not Available]	mg	[Not Available]	37.5	1	PO	[Not Available]	[Not Available]	ADJUVANT	[Not Applicable]	[Not Available]	[Not Available]
b2feca3f-8602-4a30-92bf-958ab2a2bd5d	TCGA-AK-3436	TCGA-AK-3436-D66269	E1720391-E83A-499D-8AA3-FBDFC1EB92D3	41919	Sutent	[Not Available]	Chemotherapy	1194	YES	[Not Available]	[Discrepancy]	[Not Available]	[Not Available]	[Not Available]	[Not Available]	[Not Available]	[Not Available]	[Not Available]	[Not Available]	[Not Available]	[Not Available]	[Not Available]	[Not Available]	[Not Available]	[Not Applicable]	[Not Available]	NO
fd5728e0-e495-45f5-aac8-c0856510c8aa	TCGA-AK-3453	TCGA-AK-3453-D4355	c4d89674-4155-4d65-8c93-6a0a92e587be	40494	[Not Available]	[Not Available]	Chemotherapy	[Not Available]	[Not Available]	[Not Available]	[Not Available]	[Not Available]	[Not Available]	[Not Available]	[Not Available]	[Not Available]	[Not Available]	[Not Available]	[Not Available]	1	[Not Available]	[Not Available]	[Not Available]	ADJUVANT	[Not Applicable]	[Not Available]	[Not Available]
75801b19-6569-4345-8134-82344a412c21	TCGA-B0-4718	TCGA-B0-4718-D71492	CD80DE57-91F5-4915-970A-63855FA51F49	42089	Pazopanib	[Not Available]	Chemotherapy	99	NO	1231	Clinical Progressive Disease	[Not Available]	[Not Available]	[Not Available]	[Not Available]	[Not Available]	[Not Available]	[Not Available]	[Not Available]	[Not Available]	[Not Available]	[Not Available]	[Not Available]	[Not Available]	[Not Applicable]	[Not Available]	NO
75801b19-6569-4345-8134-82344a412c21	TCGA-B0-4718	TCGA-B0-4718-D71493	2FDAAE91-FC6E-47C8-B600-0C2719CD0119	42089	Bevacizumab	[Not Available]	Chemotherapy	1363	NO	1685	Clinical Progressive Disease	[Not Available]	[Not Available]	[Not Available]	[Not Available]	[Not Available]	[Not Available]	[Not Available]	[Not Available]	[Not Available]	[Not Available]	[Not Available]	[Not Available]	[Not Available]	[Not Applicable]	[Not Available]	YES
31e9d2fc-79fa-49db-adac-7afb9609f915	TCGA-B0-4837	TCGA-B0-4837-D31227	f44ccd53-1fa1-47aa-9344-0a6c8dff1cf2	41024	Tyrosine kinase inhibitor	[Not Available]	Immunotherapy	1217	NO	[Not Available]	Clinical Progressive Disease	[Not Available]	[Not Available]	[Not Available]	[Not Available]	[Not Available]	[Not Available]	[Not Available]	[Not Available]	[Not Available]	[Not Available]	[Not Available]	[Not Available]	[Not Available]	[Not Applicable]	[Not Available]	NO
77d8c2cf-6b27-417b-9d43-14c95e6f9b85	TCGA-B0-4841	TCGA-B0-4841-D31237	af206997-7393-4f9e-a9d0-6dee745c7585	41024	INF	[Not Available]	Immunotherapy	47	NO	108	Clinical Progressive Disease	[Not Available]	[Not Available]	[Not Available]	[Not Available]	[Not Available]	[Not Available]	[Not Available]	[Not Available]	[Not Available]	[Not Available]	[Not Available]	[Not Available]	[Not Available]	[Not Applicable]	[Not Available]	NO
4ee14e95-09d8-4512-b358-3e0e7cb74c9a	TCGA-B0-4844	TCGA-B0-4844-D30999	e5d040d0-8f40-42dc-afa0-a5318868d569	41019	IL-2	[Not Available]	Chemotherapy	60	NO	[Not Available]	Clinical Progressive Disease	[Not Available]	[Not Available]	[Not Available]	[Not Available]	[Not Available]	[Not Available]	[Not Available]	[Not Available]	[Not Available]	[Not Available]	[Not Available]	[Not Available]	[Not Available]	[Not Applicable]	[Not Available]	NO
4ee14e95-09d8-4512-b358-3e0e7cb74c9a	TCGA-B0-4844	TCGA-B0-4844-D31001	c3a07cf7-d164-4b2a-8fdb-c8dde5243f59	41019	Thalidomide	[Not Available]	Chemotherapy	60	NO	[Not Available]	Clinical Progressive Disease	[Not Available]	[Not Available]	[Not Available]	[Not Available]	[Not Available]	[Not Available]	[Not Available]	[Not Available]	[Not Available]	[Not Available]	[Not Available]	[Not Available]	[Not Available]	[Not Applicable]	[Not Available]	NO
8aaa4e25-5c12-4ace-96dc-91aaa0c4457c	TCGA-B0-5094	TCGA-B0-5094-D31511	e973d23d-8bec-4f9b-99c0-e10fbb0d6468	41033	TORISEL	[Not Available]	Chemotherapy	124	NO	228	Clinical Progressive Disease	[Not Available]	[Not Available]	[Not Available]	[Not Available]	[Not Available]	[Not Available]	[Not Available]	[Not Available]	[Not Available]	[Not Available]	[Not Available]	[Not Available]	[Not Available]	[Not Applicable]	[Not Available]	NO
6b1ff32f-75a4-44aa-9da4-b6872e179c9f	TCGA-B0-5107	TCGA-B0-5107-D31607	1e2025bb-698c-4a31-9302-fe90f67db312	41036	SUTENT	[Not Available]	Chemotherapy	11	NO	[Not Available]	Clinical Progressive Disease	[Not Available]	[Not Available]	[Not Available]	[Not Available]	[Not Available]	[Not Available]	[Not Available]	[Not Available]	[Not Available]	[Not Available]	[Not Available]	[Not Available]	[Not Available]	[Not Applicable]	[Not Available]	NO
46bc69a9-0090-4809-92b8-8cb741d9007d	TCGA-B0-5115	TCGA-B0-5115-D31669	4394ed12-bf7a-429b-99c5-191808378871	41037	Pazopanib	[Not Available]	Chemotherapy	197	NO	197	[Not Applicable]	[Not Available]	[Not Available]	[Not Available]	[Not Available]	[Not Available]	[Not Available]	[Not Available]	[Not Available]	[Not Available]	[Not Available]	[Not Available]	[Not Available]	[Not Available]	[Not Applicable]	[Not Available]	NO
46bc69a9-0090-4809-92b8-8cb741d9007d	TCGA-B0-5115	TCGA-B0-5115-D31670	cbb89ea4-88a3-4965-8468-5462ed62b9fe	41037	Afinitor	[Not Available]	Chemotherapy	501	YES	[Not Available]	[Not Applicable]	[Not Available]	[Not Available]	[Not Available]	[Not Available]	[Not Available]	[Not Available]	[Not Available]	[Not Available]	[Not Available]	[Not Available]	[Not Available]	[Not Available]	[Not Available]	[Not Applicable]	[Not Available]	NO
11111b58-c7df-4291-ad8a-4baec9ff7d1f	TCGA-B0-5694	TCGA-B0-5694-D31875	4ac87a38-e1a6-4778-8a93-48f6dc837641	41039	Pazopanib	[Not Available]	Chemotherapy	441	NO	469	Clinical Progressive Disease	[Not Available]	[Not Available]	[Not Available]	[Not Available]	[Not Available]	[Not Available]	[Not Available]	[Not Available]	[Not Available]	[Not Available]	[Not Available]	[Not Available]	[Not Available]	[Not Applicable]	[Not Available]	NO
8f8a632d-7fbd-4c86-b909-afb7edb9ad28	TCGA-B0-5701	TCGA-B0-5701-D72539	5ED37448-8F4C-4B40-BA79-879C0E7025EC	42198	Interleukin-2	[Not Available]	Immunotherapy	366	NO	727	Complete Response	[Not Available]	[Not Available]	[Not Available]	[Not Available]	[Not Available]	[Not Available]	[Not Available]	[Not Available]	[Not Available]	[Not Available]	[Not Available]	[Not Available]	[Not Available]	[Not Applicable]	[Not Available]	NO
514af471-31d2-43fa-88dc-8639a5e97181	TCGA-B0-5712	TCGA-B0-5712-D31971	fcf69248-81ae-4ab6-a197-b2b486da9e71	41043	Zometa	[Not Available]	[Not Available]	177	NO	[Not Available]	Stable Disease	[Not Available]	[Not Available]	[Not Available]	[Not Available]	[Not Available]	[Not Available]	[Not Available]	[Not Available]	[Not Available]	[Not Available]	[Not Available]	[Not Available]	[Not Available]	[Not Applicable]	[Not Available]	NO
73cb1350-7590-4f79-bb86-3f395466652e	TCGA-B2-5639	TCGA-B2-5639-D15087	a9334672-bbcb-4c0e-bc83-8e6e7dfdaedf	40766	Torisel	[Not Available]	Chemotherapy	74	NO	158	[Not Available]	[Not Available]	[Not Available]	[Not Available]	11	[Not Available]	mg	mg	25	1	IV	[Not Available]	[Not Available]	ADJUVANT	[Not Applicable]	275	[Not Available]
73cb1350-7590-4f79-bb86-3f395466652e	TCGA-B2-5639	TCGA-B2-5639-D15321	036f3dd6-adad-435e-a474-903e289d323f	40772	Votrient	[Not Available]	Chemotherapy	177	YES	[Not Available]	[Not Available]	[Not Available]	[Not Available]	[Not Available]	241	[Not Available]	mg	[Not Available]	200	2	PO	[Not Available]	[Not Available]	PROGRESSION	[Not Applicable]	[Not Available]	[Not Available]
dfa9513d-4e09-405b-a80f-2987ec5c5263	TCGA-B8-4143	TCGA-B8-4143-D3365	a34a2429-50ce-49f6-af1a-62f0687ea43e	40498	Interleukin-2	[Not Available]	Immunotherapy	133	NO	388	[Not Available]	[Not Available]	[Not Available]	[Not Available]	3	[Not Available]	[Not Available]	[Not Available]	[Not Available]	1	IV	[Not Available]	[Not Available]	OTHER, SPECIFY IN NOTES	Metastatic disease at diagnosis	[Not Available]	[Not Available]
a22d5ba2-5f11-49e9-911a-ec03b785fae5	TCGA-B8-4153	TCGA-B8-4153-D12424	39f4d6f0-b29e-47cf-b96c-70750f2ab203	40695	Pazopanib	[Not Available]	Chemotherapy	238	YES	[Not Available]	[Not Available]	[Not Available]	[Not Available]	[Not Available]	1	[Not Available]	mg/day	[Not Available]	800	1	PO	[Not Available]	[Not Available]	PROGRESSION	[Not Applicable]	[Not Available]	[Not Available]
d62d39f9-c896-4758-a785-e236f0154f14	TCGA-B8-5162	TCGA-B8-5162-D17689	bce01735-34e1-4c81-bb08-874717ffcb86	40840	Sutent	[Not Available]	Chemotherapy	-58	NO	-28	[Not Available]	[Not Available]	[Not Available]	[Not Available]	1	[Not Available]	mg/day	[Not Available]	50	1	PO	[Not Available]	[Not Available]	OTHER, SPECIFY IN NOTES	Neoadjuvant	[Not Available]	[Not Available]
d9f1bb02-4cb0-4f7c-8f34-ff5f301c6b2c	TCGA-BP-4161	TCGA-BP-4161-D9811	48e716eb-d25e-434b-b899-55440e1e28b6	40633	Sunitinib	[Not Available]	Targeted Molecular therapy	2752	[Not Available]	[Not Available]	[Not Available]	[Not Available]	[Not Available]	[Not Available]	[Not Available]	[Not Available]	[Not Available]	[Not Available]	[Not Available]	1	PO	[Not Available]	[Not Available]	PROGRESSION	[Not Applicable]	[Not Available]	[Not Available]
3c1b6de7-c45f-4d86-be4b-a72ca7ca7cf9	TCGA-BP-4165	TCGA-BP-4165-D10780	9ef73876-67af-469e-90f8-430d1e6ff672	40659	Sunitinib	[Not Available]	Targeted Molecular therapy	2594	YES	[Not Available]	[Not Available]	[Not Available]	[Not Available]	[Not Available]	19	[Not Available]	[Not Available]	[Not Available]	[Not Available]	1	PO	[Not Available]	[Not Available]	PROGRESSION	[Not Applicable]	[Not Available]	[Not Available]
3f05a719-e81e-4f0c-a5c1-f1733b7aba11	TCGA-BP-4169	TCGA-BP-4169-D10866	eaa5273c-1fee-4fa9-9065-80dff2764426	40661	Interferon	[Not Available]	Immunotherapy	36	NO	78	[Not Available]	[Not Available]	[Not Available]	[Not Available]	[Not Available]	[Not Available]	[Not Available]	[Not Available]	[Not Available]	1	SC	[Not Available]	[Not Available]	OTHER, SPECIFY IN NOTES	Metastasis	[Not Available]	[Not Available]
3f05a719-e81e-4f0c-a5c1-f1733b7aba11	TCGA-BP-4169	TCGA-BP-4169-D10867	bf4d4656-1142-462e-b4e5-aeb06fe70832	40661	Axitinib	[Not Available]	Targeted Molecular therapy	127	NO	253	[Not Available]	[Not Available]	[Not Available]	[Not Available]	6	[Not Available]	[Not Available]	[Not Available]	[Not Available]	2	PO	[Not Available]	[Not Available]	PROGRESSION	[Not Applicable]	[Not Available]	[Not Available]
6ccabcd0-8f30-4828-851f-0ac7cee1a33f	TCGA-BP-4329	TCGA-BP-4329-D10883	45ddd952-faa4-459a-8e61-5ee2fbd2a071	40661	Interferon	[Not Available]	Immunotherapy	190	NO	510	[Not Available]	[Not Available]	[Not Available]	[Not Available]	[Not Available]	[Not Available]	[Not Available]	[Not Available]	9000000	1	SC	[Not Available]	[Not Available]	OTHER, SPECIFY IN NOTES	Metastasis	[Not Available]	[Not Available]
6ccabcd0-8f30-4828-851f-0ac7cee1a33f	TCGA-BP-4329	TCGA-BP-4329-D10884	9bf6d9f2-4e1f-450d-938a-99f2ca551f6d	40661	Temsirolimus	[Not Available]	Targeted Molecular therapy	204	NO	510	[Not Available]	[Not Available]	[Not Available]	[Not Available]	[Not Available]	[Not Available]	mg	[Not Available]	15	1	IV	[Not Available]	[Not Available]	OTHER, SPECIFY IN NOTES	Metastasis	[Not Available]	[Not Available]
e5eca191-f585-490d-81e3-9cced1047093	TCGA-BP-4334	TCGA-BP-4334-D10945	f1c101cf-ebc1-4e9f-b1d7-9e232a6703e1	40665	Interferon	[Not Available]	Immunotherapy	520	NO	[Not Available]	[Not Available]	[Not Available]	[Not Available]	[Not Available]	[Not Available]	[Not Available]	[Not Available]	[Not Available]	6000000	1	SC	[Not Available]	[Not Available]	PROGRESSION	[Not Applicable]	[Not Available]	[Not Available]
ed97aeee-2a5b-4361-ab4f-f53c3fc5f532	TCGA-BP-4335	TCGA-BP-4335-D10965	bb6c5138-3ac8-4e82-954f-554ed8e41733	40665	Interferon	[Not Available]	Immunotherapy	42	NO	134	[Not Available]	[Not Available]	[Not Available]	[Not Available]	4	[Not Available]	mg/kg	[Not Available]	4.5	1	SC	[Not Available]	[Not Available]	OTHER, SPECIFY IN NOTES	Metastasis	[Not Available]	[Not Available]
4978eb8d-4a38-470b-9a00-6dd3aada1aa9	TCGA-BP-4338	TCGA-BP-4338-D11015	187ebffd-f320-4e65-9abe-4622eb4d4edf	40665	Sorafenib	[Not Available]	Targeted Molecular therapy	2460	NO	2572	[Not Available]	[Not Available]	[Not Available]	[Not Available]	4	[Not Available]	mg	[Not Available]	400	2	PO	[Not Available]	[Not Available]	PROGRESSION	[Not Applicable]	[Not Available]	[Not Available]
4978eb8d-4a38-470b-9a00-6dd3aada1aa9	TCGA-BP-4338	TCGA-BP-4338-D11006	7b83d49a-3f0b-40ec-a14a-4e0f51023c24	40665	Sunitinib	[Not Available]	Targeted Molecular therapy	1765	NO	2450	[Not Available]	[Not Available]	[Not Available]	[Not Available]	17	[Not Available]	mg	[Not Available]	50	1	PO	[Not Available]	[Not Available]	OTHER, SPECIFY IN NOTES	Metastasis	[Not Available]	[Not Available]
4978eb8d-4a38-470b-9a00-6dd3aada1aa9	TCGA-BP-4338	TCGA-BP-4338-D11017	cb7f3030-e7de-4294-a627-6f083cd7db48	40665	Everolimus	[Not Available]	Chemotherapy	2586	YES	[Not Available]	[Not Available]	[Not Available]	[Not Available]	[Not Available]	9	[Not Available]	mg	[Not Available]	10	3	PO	[Not Available]	[Not Available]	PROGRESSION	[Not Applicable]	[Not Available]	[Not Available]
037c691e-6320-451b-9276-78459f1b705c	TCGA-BP-4352	TCGA-BP-4352-D11087	00ba7bc0-941c-421e-b252-a4520dfff776	40666	Sunitinib	[Not Available]	Targeted Molecular therapy	35	NO	59	[Not Available]	[Not Available]	[Not Available]	[Not Available]	[Not Available]	[Not Available]	[Not Available]	[Not Available]	[Not Available]	1	PO	[Not Available]	[Not Available]	PALLIATIVE	[Not Applicable]	[Not Available]	[Not Available]
d9208e7b-0b47-43ff-a4e8-d4e591e286c4	TCGA-BP-4354	TCGA-BP-4354-D9704	f671bce4-3fdd-4ead-a4d1-9c18c9202c37	40632	Temsirolimus	[Not Available]	Targeted Molecular therapy	721	YES	[Not Available]	[Not Available]	[Not Available]	[Not Available]	[Not Available]	[Not Available]	[Not Available]	[Not Available]	[Not Available]	[Not Available]	5	IV	[Not Available]	[Not Available]	OTHER, SPECIFY IN NOTES	Patient cannot tolerate sorafenib	[Not Available]	[Not Available]
d9208e7b-0b47-43ff-a4e8-d4e591e286c4	TCGA-BP-4354	TCGA-BP-4354-D9699	6c38b574-14e5-4695-abe8-f6cb849dbbbf	40632	Sunitinib	[Not Available]	Targeted Molecular therapy	10	NO	454	[Not Available]	[Not Available]	[Not Available]	[Not Available]	11	[Not Available]	mg	[Not Available]	25	1	PO	[Not Available]	[Not Available]	OTHER, SPECIFY IN NOTES	NeoAdjuvant	[Not Available]	[Not Available]
d9208e7b-0b47-43ff-a4e8-d4e591e286c4	TCGA-BP-4354	TCGA-BP-4354-D9703	bba9708b-8ae0-4cf6-b829-34d791507114	40632	Sorafenib	[Not Available]	Targeted Molecular therapy	595	NO	[Not Available]	[Not Available]	[Not Available]	[Not Available]	[Not Available]	[Not Available]	[Not Available]	mg	[Not Available]	200	4	PO	[Not Available]	[Not Available]	ADJUVANT	[Not Applicable]	[Not Available]	[Not Available]
d9208e7b-0b47-43ff-a4e8-d4e591e286c4	TCGA-BP-4354	TCGA-BP-4354-D9700	f7b86ebd-d7e6-48f7-9409-d19f3255f60e	40632	Sunitinib	[Not Available]	Targeted Molecular therapy	490	NO	525	[Not Available]	[Not Available]	[Not Available]	[Not Available]	3	[Not Available]	mg	[Not Available]	25	2	PO	[Not Available]	[Not Available]	ADJUVANT	[Not Applicable]	[Not Available]	[Not Available]
d9208e7b-0b47-43ff-a4e8-d4e591e286c4	TCGA-BP-4354	TCGA-BP-4354-D9701	3672a244-cace-4004-87c5-a99ea6db94db	40632	Sorafenib	[Not Available]	Targeted Molecular therapy	583	NO	589	[Not Available]	[Not Available]	[Not Available]	[Not Available]	1	[Not Available]	mg	[Not Available]	400	3	PO	[Not Available]	[Not Available]	PROGRESSION	[Not Applicable]	[Not Available]	[Not Available]
d9208e7b-0b47-43ff-a4e8-d4e591e286c4	TCGA-BP-4354	TCGA-BP-4354-D9749	6c5d6738-1a45-445e-93cb-7724d8401079	40633	Gefitinib	[Not Available]	Targeted Molecular therapy	10	NO	454	[Not Available]	[Not Available]	[Not Available]	[Not Available]	11	[Not Available]	[Not Available]	[Not Available]	[Not Available]	1	PO	[Not Available]	[Not Available]	OTHER, SPECIFY IN NOTES	Neoadjuvant	[Not Available]	[Not Available]
c3cc716b-1b9c-4e73-9a40-f1f891a17c2d	TCGA-BP-4770	TCGA-BP-4770-D11188	52c3f62f-beeb-4f58-b4e1-a829236a5240	40667	Interferon	[Not Available]	Immunotherapy	211	NO	[Not Available]	[Not Available]	[Not Available]	[Not Available]	[Not Available]	[Not Available]	[Not Available]	[Not Available]	[Not Available]	5000000	1	SC	[Not Available]	[Not Available]	OTHER, SPECIFY IN NOTES	metastasis	[Not Available]	[Not Available]
500636a5-d42b-469f-98e2-fdd4dddc61a0	TCGA-BP-4787	TCGA-BP-4787-D11361	0fdec60b-14c1-443d-a7c6-b4f0f34159d0	40672	Sorafenib	[Not Available]	Targeted Molecular therapy	361	NO	388	[Not Available]	[Not Available]	[Not Available]	[Not Available]	1	[Not Available]	mg	[Not Available]	400	2	PO	[Not Available]	[Not Available]	PROGRESSION	[Not Applicable]	[Not Available]	[Not Available]
500636a5-d42b-469f-98e2-fdd4dddc61a0	TCGA-BP-4787	TCGA-BP-4787-D11362	4edfe557-3699-45c5-8a0f-a1c831dbc79a	40672	Temsirolimus	[Not Available]	Chemotherapy	412	NO	440	[Not Available]	[Not Available]	[Not Available]	[Not Available]	[Not Available]	[Not Available]	mg	[Not Available]	25	3	IV	[Not Available]	[Not Available]	PROGRESSION	[Not Applicable]	[Not Available]	[Not Available]
500636a5-d42b-469f-98e2-fdd4dddc61a0	TCGA-BP-4787	TCGA-BP-4787-D11359	6cde261d-db81-44f3-885d-a1202bb65401	40672	Sunitinib	[Not Available]	Targeted Molecular therapy	53	NO	333	[Not Available]	[Not Available]	[Not Available]	[Not Available]	7	[Not Available]	mg	[Not Available]	50	1	PO	[Not Available]	[Not Available]	OTHER, SPECIFY IN NOTES	Metastasis	[Not Available]	[Not Available]
b81998f2-b3ff-4976-bc1c-8d38a68efa1d	TCGA-BP-4804	TCGA-BP-4804-D21225	fd535393-6afe-4ffb-bfd6-cb135562af1b	40946	Sunitinib	[Not Available]	Targeted Molecular therapy	1373	YES	[Not Available]	[Not Available]	[Not Available]	[Not Available]	[Not Available]	[Not Available]	[Not Available]	mg	[Not Available]	37.5	2	PO	[Not Available]	[Not Available]	OTHER, SPECIFY IN NOTES	Dose reduction	[Not Available]	[Not Available]
b81998f2-b3ff-4976-bc1c-8d38a68efa1d	TCGA-BP-4804	TCGA-BP-4804-D21224	fa5ad7b2-aefb-4f88-b687-342abbb3c338	40946	Sunitinib	[Not Available]	Targeted Molecular therapy	1289	NO	1359	[Not Available]	[Not Available]	[Not Available]	[Not Available]	2	[Not Available]	mg	[Not Available]	50	1	PO	[Not Available]	[Not Available]	PROGRESSION	[Not Applicable]	[Not Available]	[Not Available]
d6625c4d-cd1c-4c62-8100-e8b2a49ce3ad	TCGA-BP-4974	TCGA-BP-4974-D9813	0ed85dba-57c4-4f24-b5c3-33cae30dc8de	40633	Sunitinib	[Not Available]	Targeted Molecular therapy	56	NO	58	[Not Available]	[Not Available]	[Not Available]	[Not Available]	1	[Not Available]	[Not Available]	[Not Available]	[Not Available]	1	PO	[Not Available]	[Not Available]	PROGRESSION	[Not Applicable]	[Not Available]	[Not Available]
d6625c4d-cd1c-4c62-8100-e8b2a49ce3ad	TCGA-BP-4974	TCGA-BP-4974-D9815	7439b55d-69e9-4010-bcb3-b051ac46c94d	40633	Sunitinib	[Not Available]	Targeted Molecular therapy	75	NO	155	[Not Available]	[Not Available]	[Not Available]	[Not Available]	[Not Available]	[Not Available]	mg	[Not Available]	50	2	PO	[Not Available]	[Not Available]	OTHER, SPECIFY IN NOTES	Re-started treatment	[Not Available]	[Not Available]
d6625c4d-cd1c-4c62-8100-e8b2a49ce3ad	TCGA-BP-4974	TCGA-BP-4974-D9816	deb54796-0c89-40a5-a469-0ba39580ca2e	40633	Sorafenib	[Not Available]	Targeted Molecular therapy	178	NO	[Not Available]	[Not Available]	[Not Available]	[Not Available]	[Not Available]	[Not Available]	[Not Available]	[Not Available]	[Not Available]	[Not Available]	3	PO	[Not Available]	[Not Available]	OTHER, SPECIFY IN NOTES	[Unknown]	[Not Available]	[Not Available]
d6625c4d-cd1c-4c62-8100-e8b2a49ce3ad	TCGA-BP-4974	TCGA-BP-4974-D9814	0c9ca688-dbc5-4768-a966-40b9c23f8d80	40633	Gefitinib	[Not Available]	Targeted Molecular therapy	56	NO	59	[Not Available]	[Not Available]	[Not Available]	[Not Available]	1	[Not Available]	[Not Available]	[Not Available]	[Not Available]	1	PO	[Not Available]	[Not Available]	PROGRESSION	[Not Applicable]	[Not Available]	[Not Available]
c285ada3-fd49-46a5-882f-b6c352572e2a	TCGA-BP-4985	TCGA-BP-4985-D11103	45bfa7b8-f1d7-46e6-ab48-70cfc7b66d4f	40665	Sunitinib	[Not Available]	Targeted Molecular therapy	307	NO	728	[Not Available]	[Not Available]	[Not Available]	[Not Available]	9	[Not Available]	mg	[Not Available]	50	1	PO	[Not Available]	[Not Available]	PROGRESSION	[Not Applicable]	[Not Available]	[Not Available]
57070e5b-0eb5-44b7-abb3-3007fa34543a	TCGA-BP-5009	TCGA-BP-5009-D9680	62753c86-2bba-4018-ba2b-f1bde4e757c3	40632	Everolimus	[Not Available]	Chemotherapy	609	NO	1023	[Not Available]	[Not Available]	[Not Available]	[Not Available]	5	[Not Available]	mg	[Not Available]	10	2	PO	[Not Available]	[Not Available]	PROGRESSION	[Not Applicable]	[Not Available]	[Not Available]
57070e5b-0eb5-44b7-abb3-3007fa34543a	TCGA-BP-5009	TCGA-BP-5009-D9683	acadf3e7-76af-4657-bcb0-f8ff07e5d8c2	40632	Pazopanib	[Not Available]	Targeted Molecular therapy	1029	NO	[Not Available]	[Not Available]	[Not Available]	[Not Available]	[Not Available]	[Not Available]	[Not Available]	[Not Available]	[Not Available]	[Not Available]	4	PO	[Not Available]	[Not Available]	OTHER, SPECIFY IN NOTES	[Not Available]	[Not Available]	[Not Available]
57070e5b-0eb5-44b7-abb3-3007fa34543a	TCGA-BP-5009	TCGA-BP-5009-D9678	6e619ac0-1fae-4043-8203-45902fb4ce6f	40632	Sunitinib	[Not Available]	Chemotherapy	338	NO	577	[Not Available]	[Not Available]	[Not Available]	[Not Available]	6	[Not Available]	mg	[Not Available]	50	1	PO	[Not Available]	[Not Available]	OTHER, SPECIFY IN NOTES	recurrent AND metastatic	[Not Available]	[Not Available]
57070e5b-0eb5-44b7-abb3-3007fa34543a	TCGA-BP-5009	TCGA-BP-5009-D9681	418f9d32-3c0b-417a-a008-81977b4be13d	40632	Bevacizumab	[Not Available]	Chemotherapy	765	NO	765	[Not Available]	[Not Available]	[Not Available]	[Not Available]	1	[Not Available]	mg	[Not Available]	800	3	IV	[Not Available]	[Not Available]	PROGRESSION	[Not Applicable]	[Not Available]	[Not Available]
6e9e5e05-2bf8-4724-8e31-241f517289de	TCGA-BP-5178	TCGA-BP-5178-D9760	6165a14b-241a-45c4-bbe9-6e5191d3e232	40633	Sorafenib	[Not Available]	Targeted Molecular therapy	407	NO	772	[Not Available]	[Not Available]	[Not Available]	[Not Available]	[Not Available]	[Not Available]	[Not Available]	[Not Available]	[Not Available]	1	PO	[Not Available]	[Not Available]	PROGRESSION	[Not Applicable]	[Not Available]	[Not Available]
23c7555b-7a37-415d-bda8-3588078a0c2e	TCGA-BP-5189	TCGA-BP-5189-D9666	9540f223-bc67-458e-8ae1-e8de7f543e1c	40632	Temsirolimus	[Not Available]	Targeted Molecular therapy	661	NO	773	[Not Available]	[Not Available]	[Not Available]	[Not Available]	[Not Available]	[Not Available]	mg	[Not Available]	25	1	IV	[Not Available]	[Not Available]	PROGRESSION	[Not Applicable]	[Not Available]	[Not Available]
23c7555b-7a37-415d-bda8-3588078a0c2e	TCGA-BP-5189	TCGA-BP-5189-D9667	effb694d-5c1a-44b8-a266-0d03ce5354f4	40632	Bevacizumab	[Not Available]	Chemotherapy	794	NO	794	[Not Available]	[Not Available]	[Not Available]	[Not Available]	1	[Not Available]	[Not Available]	[Not Available]	[Not Available]	2	IV	[Not Available]	[Not Available]	PROGRESSION	[Not Applicable]	[Not Available]	[Not Available]
54c9850c-9b67-42ea-a04b-16a88f786dfa	TCGA-BP-5201	TCGA-BP-5201-D9676	51a5697f-1fa8-410c-9d4b-f7596084fd9f	40632	Interleukin-2	[Not Available]	Immunotherapy	469	NO	603	[Not Available]	[Not Available]	[Not Available]	[Not Available]	2	[Not Available]	[Not Available]	[Not Available]	[Not Available]	1	[Not Available]	[Not Available]	[Not Available]	PROGRESSION	[Not Applicable]	[Not Available]	[Not Available]
772e3aed-f211-42a1-9ab2-1c543f581541	TCGA-CJ-4637	TCGA-CJ-4637-D6633	a2b45ec6-a9e8-4e6e-b316-cd86e3db9123	40567	Temsirolimus	[Not Available]	Chemotherapy	47	NO	476	[Not Available]	[Not Available]	[Not Available]	[Not Available]	[Not Available]	[Not Available]	[Not Available]	[Not Available]	[Not Available]	[Not Available]	IV	[Not Available]	[Not Available]	PROGRESSION	[Not Applicable]	[Not Available]	[Not Available]
772e3aed-f211-42a1-9ab2-1c543f581541	TCGA-CJ-4637	TCGA-CJ-4637-D9507	7d759b39-3ca8-4087-84f1-45f030189eac	40626	Bortezomib	[Not Available]	Targeted Molecular therapy	1476	NO	1742	[Not Available]	[Not Available]	[Not Available]	[Not Available]	[Not Available]	[Not Available]	[Not Available]	[Not Available]	[Not Available]	[Not Available]	IV	[Not Available]	[Not Available]	PROGRESSION	[Not Applicable]	[Not Available]	[Not Available]
772e3aed-f211-42a1-9ab2-1c543f581541	TCGA-CJ-4637	TCGA-CJ-4637-D9502	6fe89f3d-273f-4de3-9f20-bd7ed30440a4	40627	Sorafenib	[Not Available]	Targeted Molecular therapy	849	NO	861	[Not Available]	[Not Available]	[Not Available]	[Not Available]	[Not Available]	[Not Available]	[Not Available]	[Not Available]	[Not Available]	[Not Available]	PO	[Not Available]	[Not Available]	PROGRESSION	[Not Applicable]	[Not Available]	[Not Available]
772e3aed-f211-42a1-9ab2-1c543f581541	TCGA-CJ-4637	TCGA-CJ-4637-D9504	54419681-f557-4d4d-8a03-a2dc7482a7d0	40627	Avastin	[Not Available]	Targeted Molecular therapy	1868	NO	1883	[Not Available]	[Not Available]	[Not Available]	[Not Available]	[Not Available]	[Not Available]	[Not Available]	[Not Available]	[Not Available]	[Not Available]	IV	[Not Available]	[Not Available]	PROGRESSION	[Not Applicable]	[Not Available]	[Not Available]
772e3aed-f211-42a1-9ab2-1c543f581541	TCGA-CJ-4637	TCGA-CJ-4637-D9503	43b4785b-3f0f-4184-be86-dacff571cf29	40627	nab-rapamycin	[Not Available]	Targeted Molecular therapy	1213	NO	1468	[Not Available]	[Not Available]	[Not Available]	[Not Available]	[Not Available]	[Not Available]	[Not Available]	[Not Available]	[Not Available]	[Not Available]	PO	[Not Available]	[Not Available]	PROGRESSION	[Not Applicable]	[Not Available]	[Not Available]
772e3aed-f211-42a1-9ab2-1c543f581541	TCGA-CJ-4637	TCGA-CJ-4637-D9505	1ec9011a-b889-47c0-a845-6af51b872a8f	40627	AZD	[Not Available]	Targeted Molecular therapy	1868	NO	1888	[Not Available]	[Not Available]	[Not Available]	[Not Available]	[Not Available]	[Not Available]	[Not Available]	[Not Available]	[Not Available]	[Not Available]	SC	[Not Available]	[Not Available]	PROGRESSION	[Not Applicable]	[Not Available]	[Not Available]
772e3aed-f211-42a1-9ab2-1c543f581541	TCGA-CJ-4637	TCGA-CJ-4637-D9501	94cf2cda-aca4-49a9-b311-bfa9cf70196a	40627	Sutent	[Not Available]	Chemotherapy	512	NO	816	[Not Available]	[Not Available]	[Not Available]	[Not Available]	[Not Available]	[Not Available]	[Not Available]	[Not Available]	[Not Available]	[Not Available]	PO	[Not Available]	[Not Available]	PROGRESSION	[Not Applicable]	[Not Available]	[Not Available]
772e3aed-f211-42a1-9ab2-1c543f581541	TCGA-CJ-4637	TCGA-CJ-4637-D9506	e72b6d1a-b943-4cd7-9915-382face7ca16	40627	Pazopanib	[Not Available]	Targeted Molecular therapy	1962	NO	2053	[Not Available]	[Not Available]	[Not Available]	[Not Available]	[Not Available]	[Not Available]	[Not Available]	[Not Available]	[Not Available]	[Not Available]	PO	[Not Available]	[Not Available]	PROGRESSION	[Not Applicable]	[Not Available]	[Not Available]
772e3aed-f211-42a1-9ab2-1c543f581541	TCGA-CJ-4637	TCGA-CJ-4637-D9499	191125ca-4520-483c-b644-25d9065e0a1c	40627	Roferon-A	[Not Available]	Chemotherapy	51	NO	476	[Not Available]	[Not Available]	[Not Available]	[Not Available]	[Not Available]	[Not Available]	[Not Available]	[Not Available]	[Not Available]	[Not Available]	SC	[Not Available]	[Not Available]	PROGRESSION	[Not Applicable]	[Not Available]	[Not Available]
772e3aed-f211-42a1-9ab2-1c543f581541	TCGA-CJ-4637	TCGA-CJ-4637-D9500	afce5403-0ffb-4b19-82a9-c8132d2d406a	40627	Intron A	[Not Available]	Chemotherapy	484	NO	507	[Not Available]	[Not Available]	[Not Available]	[Not Available]	[Not Available]	[Not Available]	[Not Available]	[Not Available]	[Not Available]	[Not Available]	SC	[Not Available]	[Not Available]	PROGRESSION	[Not Applicable]	[Not Available]	[Not Available]
06197e26-3cb0-4bd0-a6e8-dd9af5047c6a	TCGA-CJ-4638	TCGA-CJ-4638-D6635	a35ff921-80b8-4e3f-8530-b47b5a68224c	40567	GEMICTIABINE	[Not Available]	Chemotherapy	70	NO	160	[Not Available]	[Not Available]	[Not Available]	[Not Available]	5	[Not Available]	[Not Available]	[Not Available]	[Not Available]	[Unknown]	PO	[Not Available]	[Not Available]	PROGRESSION	[Not Applicable]	[Not Available]	[Not Available]
06197e26-3cb0-4bd0-a6e8-dd9af5047c6a	TCGA-CJ-4638	TCGA-CJ-4638-D9421	331065f1-e997-4f48-b80d-594232107917	40625	Avastin	[Not Available]	Chemotherapy	252	NO	281	[Not Available]	[Not Available]	[Not Available]	[Not Available]	[Not Available]	[Not Available]	[Not Available]	[Not Available]	[Not Available]	[Unknown]	PO	[Not Available]	[Not Available]	PROGRESSION	[Not Applicable]	[Not Available]	[Not Available]
06197e26-3cb0-4bd0-a6e8-dd9af5047c6a	TCGA-CJ-4638	TCGA-CJ-4638-D9420	9bc6a537-f896-4571-b090-aa5369b2fdc7	40625	interleukin-2	[Not Available]	Chemotherapy	192	NO	221	[Not Available]	[Not Available]	[Not Available]	[Not Available]	[Not Available]	[Not Available]	[Not Available]	[Not Available]	[Not Available]	[Unknown]	SC	[Not Available]	[Not Available]	PROGRESSION	[Not Applicable]	[Not Available]	[Not Available]
06197e26-3cb0-4bd0-a6e8-dd9af5047c6a	TCGA-CJ-4638	TCGA-CJ-4638-D9419	0f9a0801-21be-4181-af14-88aeee0f9eaa	40625	5-fluorouracil	[Not Available]	Chemotherapy	70	NO	252	[Not Available]	[Not Available]	[Not Available]	[Not Available]	[Not Available]	[Not Available]	[Not Available]	[Not Available]	[Not Available]	[Unknown]	IV	[Not Available]	[Not Available]	PROGRESSION	[Not Applicable]	[Not Available]	[Not Available]
cdfa3c5d-2fe8-4dfd-92c2-a54f39f55f18	TCGA-CJ-4641	TCGA-CJ-4641-D6637	e62a1180-3ebc-4f8b-83bb-351a04aaef97	40567	Oncophage	[Not Available]	Immunotherapy	37	NO	321	[Not Available]	[Not Available]	[Not Available]	[Not Available]	9	[Not Available]	[Not Available]	[Not Available]	[Not Available]	[Unknown]	SC	[Not Available]	[Not Available]	PROGRESSION	[Not Applicable]	[Not Available]	[Not Available]
8fd493c5-1375-4f76-b337-c9a75e3abdbe	TCGA-CJ-4644	TCGA-CJ-4644-D9529	7d5cbe9b-e974-4f19-8878-6a0ba7996e82	40627	Oncophage	[Not Available]	Other, specify in notes	27	NO	229	[Not Available]	[Not Available]	[Not Available]	[Not Available]	[Not Available]	vaccine	[Not Available]	[Not Available]	[Not Available]	1	IM	[Not Available]	[Not Available]	PROGRESSION	[Not Applicable]	[Not Available]	[Not Available]
8fd493c5-1375-4f76-b337-c9a75e3abdbe	TCGA-CJ-4644	TCGA-CJ-4644-D9532	b746fd6f-9a10-4c50-936e-541564bcd151	40627	Tarceva	[Not Available]	Targeted Molecular therapy	229	NO	316	[Not Available]	[Not Available]	[Not Available]	[Not Available]	[Not Available]	[Not Available]	[Not Available]	[Not Available]	[Not Available]	3	PO	[Not Available]	[Not Available]	PROGRESSION	[Not Applicable]	[Not Available]	[Not Available]
8fd493c5-1375-4f76-b337-c9a75e3abdbe	TCGA-CJ-4644	TCGA-CJ-4644-D9530	7171cb82-3852-4fe2-bac7-14c6a3ab38aa	40627	Avastin	[Not Available]	Targeted Molecular therapy	229	NO	316	[Not Available]	[Not Available]	[Not Available]	[Not Available]	[Not Available]	[Not Available]	[Not Available]	[Not Available]	[Not Available]	2	IV	[Not Available]	[Not Available]	PROGRESSION	[Not Applicable]	[Not Available]	[Not Available]
8fd493c5-1375-4f76-b337-c9a75e3abdbe	TCGA-CJ-4644	TCGA-CJ-4644-D10749	48df2010-d4bd-4b71-af35-008ff98b2aea	40658	Intron A	[Not Available]	Immunotherapy	162	NO	222	[Not Available]	[Not Available]	[Not Available]	[Not Available]	1	[Not Available]	[Not Available]	[Not Available]	1,000,000 units	2	SC	[Not Available]	[Not Available]	PROGRESSION	[Not Applicable]	[Not Available]	[Not Available]
8fd493c5-1375-4f76-b337-c9a75e3abdbe	TCGA-CJ-4644	TCGA-CJ-4644-D10750	c9a68985-cd93-423c-87f0-5c0871107e5d	40658	Capecitabine	[Not Available]	Chemotherapy	150	NO	222	[Not Available]	[Not Available]	[Not Available]	[Not Available]	[Not Available]	[Not Available]	g/day	[Not Available]	2.5	2	PO	[Not Available]	[Not Available]	PROGRESSION	[Not Applicable]	[Not Available]	[Not Available]
2309c424-26fa-4cc6-a22a-2dc0f989af59	TCGA-CJ-4868	TCGA-CJ-4868-D6854	42b8804d-3c4c-465e-af76-6758e70bad3c	40571	Proleukin	[Not Available]	Immunotherapy	56	NO	89	[Not Available]	[Not Available]	[Not Available]	[Not Available]	2	[Not Available]	[Not Available]	[Not Available]	[Not Available]	1	IV	[Not Available]	[Not Available]	PROGRESSION	[Not Applicable]	[Not Available]	[Not Available]
2309c424-26fa-4cc6-a22a-2dc0f989af59	TCGA-CJ-4868	TCGA-CJ-4868-D9080	ee8e56ec-9936-46f8-aeb1-a67088026892	40615	Nexavar	[Not Available]	Targeted Molecular therapy	379	NO	534	[Not Available]	[Not Available]	[Not Available]	[Not Available]	1	[Not Available]	[Not Available]	[Not Available]	[Not Available]	4	PO	[Not Available]	[Not Available]	PROGRESSION	[Not Applicable]	[Not Available]	[Not Available]
2309c424-26fa-4cc6-a22a-2dc0f989af59	TCGA-CJ-4868	TCGA-CJ-4868-D9079	0391be00-8514-4e2b-b975-bc795d2fcf45	40615	Gemcitabine	[Not Available]	Chemotherapy	296	NO	365	[Not Available]	[Not Available]	[Not Available]	[Not Available]	3	[Not Available]	[Not Available]	[Not Available]	[Not Available]	3	IV	[Not Available]	[Not Available]	PROGRESSION	[Not Applicable]	[Not Available]	[Not Available]
2309c424-26fa-4cc6-a22a-2dc0f989af59	TCGA-CJ-4868	TCGA-CJ-4868-D9078	47b7c613-8b63-4efc-8097-7f759a60240d	40615	Avastin	[Not Available]	Targeted Molecular therapy	135	NO	282	[Not Available]	[Not Available]	[Not Available]	[Not Available]	10	[Not Available]	[Not Available]	[Not Available]	[Not Available]	2	IV	[Not Available]	[Not Available]	PROGRESSION	[Not Applicable]	[Not Available]	[Not Available]
2309c424-26fa-4cc6-a22a-2dc0f989af59	TCGA-CJ-4868	TCGA-CJ-4868-D9513	11d4be47-87a8-4f0e-9466-a404b93acfb7	40627	Capecitabin	[Not Available]	Chemotherapy	296	NO	365	[Not Available]	[Not Available]	[Not Available]	[Not Available]	[Not Available]	[Not Available]	[Not Available]	[Not Available]	[Not Available]	3	PO	[Not Available]	[Not Available]	PROGRESSION	[Not Applicable]	[Not Available]	[Not Available]
2309c424-26fa-4cc6-a22a-2dc0f989af59	TCGA-CJ-4868	TCGA-CJ-4868-D9517	8ed04635-5953-4258-85d0-a984c7a3ac4c	40627	Tarceva	[Not Available]	Targeted Molecular therapy	114	NO	288	[Not Available]	[Not Available]	[Not Available]	[Not Available]	10	[Not Available]	[Not Available]	[Not Available]	[Not Available]	[Unknown]	PO	[Not Available]	[Not Available]	PROGRESSION	[Not Applicable]	[Not Available]	[Not Available]
06d86d68-0fd5-4c6e-8783-ed732a3291e8	TCGA-CJ-4869	TCGA-CJ-4869-D7278	5b6b47ff-9927-47ce-9709-808915090758	40582	Nexavaar	[Not Available]	Targeted Molecular therapy	767	NO	854	[Not Available]	[Not Available]	[Not Available]	[Not Available]	[Not Available]	Sorafenib	[Not Available]	[Not Available]	[Not Available]	[Not Available]	PO	[Not Available]	[Not Available]	RECURRENCE	[Not Applicable]	[Not Available]	[Not Available]
06d86d68-0fd5-4c6e-8783-ed732a3291e8	TCGA-CJ-4869	TCGA-CJ-4869-D7279	8941a2e3-132e-40a4-85f2-416e15dd6e44	40582	Sutent	[Not Available]	Targeted Molecular therapy	881	NO	1963	[Not Available]	[Not Available]	[Not Available]	[Not Available]	[Not Available]	[Not Available]	[Not Available]	[Not Available]	[Not Available]	[Not Available]	PO	[Not Available]	[Not Available]	RECURRENCE	[Not Applicable]	[Not Available]	[Not Available]
dbe16232-525e-4101-9a39-9d4323b10ee9	TCGA-CJ-4871	TCGA-CJ-4871-D6855	81044ef3-a822-4e52-a82a-895cacf8a4d7	40571	Alpha Interferon	[Not Available]	Immunotherapy	98	YES	[Not Available]	[Not Available]	[Not Available]	[Not Available]	[Not Available]	65	[Not Available]	[Not Available]	[Not Available]	[Not Available]	1	SC	[Not Available]	[Not Available]	PROGRESSION	[Not Applicable]	[Not Available]	[Not Available]
818022ea-123e-438d-9671-542f479028f2	TCGA-CJ-4875	TCGA-CJ-4875-D6857	3575a7d6-f94c-42a0-8cc3-1ab64eaee621	40571	Nexavar	[Not Available]	Targeted Molecular therapy	1083	YES	[Not Available]	[Not Available]	[Not Available]	[Not Available]	[Not Available]	36	[Not Available]	[Not Available]	[Not Available]	[Not Available]	[Not Available]	PO	[Not Available]	[Not Available]	PROGRESSION	[Not Applicable]	[Not Available]	[Not Available]
24c1cf70-bd67-431e-a623-d20f8d3f52b2	TCGA-CJ-4881	TCGA-CJ-4881-D6858	78b17dac-e678-491b-97fa-ab8b7c3bcd57	40571	temsirolimus	[Not Available]	Targeted Molecular therapy	1931	YES	[Not Available]	[Not Available]	[Not Available]	[Not Available]	[Not Available]	[Not Available]	[Not Available]	[Not Available]	[Not Available]	[Not Available]	1	IV	[Not Available]	[Not Available]	RECURRENCE	[Not Applicable]	[Not Available]	[Not Available]
c4bbbcd2-aa18-4b1f-99d4-93279e31d7e7	TCGA-CJ-4887	TCGA-CJ-4887-D6859	9a7f9dd4-d130-46e4-9171-0a24cb30b914	40571	Oncophage	[Not Available]	Immunotherapy	34	NO	124	[Not Available]	[Not Available]	[Not Available]	[Not Available]	[Not Available]	[Not Available]	[Not Available]	[Not Available]	[Not Available]	[Not Available]	IV	[Not Available]	[Not Available]	OTHER, SPECIFY IN NOTES	[Not Available]	[Not Available]	[Not Available]
f2fca062-ca87-4089-916d-49b9ff146797	TCGA-CJ-4888	TCGA-CJ-4888-D6860	f7000bb0-6264-451a-bdf1-3561c7f81464	40571	sutent	[Not Available]	Targeted Molecular therapy	576	NO	1456	[Not Available]	[Not Available]	[Not Available]	[Not Available]	36	[Not Available]	[Not Available]	[Not Available]	[Not Available]	[Not Available]	PO	[Not Available]	[Not Available]	PROGRESSION	[Not Applicable]	[Not Available]	[Not Available]
46d34d0c-b8a2-4ebd-b9a0-5485904ecafa	TCGA-CJ-4890	TCGA-CJ-4890-D6861	388898f3-bb79-4469-aaa0-39327882283c	40571	Interferon	[Not Available]	Immunotherapy	70	NO	211	[Not Available]	[Not Available]	[Not Available]	[Not Available]	4	[Not Available]	[Not Available]	[Not Available]	[Not Available]	[Not Available]	SC	[Not Available]	[Not Available]	PROGRESSION	[Not Applicable]	[Not Available]	[Not Available]
46d34d0c-b8a2-4ebd-b9a0-5485904ecafa	TCGA-CJ-4890	TCGA-CJ-4890-D9959	e38d0bef-e746-47e6-a0bc-762fdc1919be	40637	Nexavar	[Not Available]	Targeted Molecular therapy	1483	NO	1636	[Not Available]	[Not Available]	[Not Available]	[Not Available]	[Not Available]	[Not Available]	[Not Available]	[Not Available]	[Not Available]	[Not Available]	PO	[Not Available]	[Not Available]	PROGRESSION	[Not Applicable]	[Not Available]	[Not Available]
46d34d0c-b8a2-4ebd-b9a0-5485904ecafa	TCGA-CJ-4890	TCGA-CJ-4890-D9953	0978afe3-0801-4e3a-a499-1f9b4aa63be9	40637	Tipifarnib	[Not Available]	Targeted Molecular therapy	263	NO	444	[Not Available]	[Not Available]	[Not Available]	[Not Available]	6	[Not Available]	[Not Available]	[Not Available]	[Not Available]	[Not Available]	PO	[Not Available]	[Not Available]	PROGRESSION	[Not Applicable]	[Not Available]	[Not Available]
46d34d0c-b8a2-4ebd-b9a0-5485904ecafa	TCGA-CJ-4890	TCGA-CJ-4890-D9956	5916d249-20d8-420a-bd3f-ee16a03ca70d	40637	Sutent	[Not Available]	Targeted Molecular therapy	480	NO	1483	[Not Available]	[Not Available]	[Not Available]	[Not Available]	[Not Available]	[Not Available]	[Not Available]	[Not Available]	[Not Available]	[Not Available]	PO	[Not Available]	[Not Available]	PROGRESSION	[Not Applicable]	[Not Available]	[Not Available]
46d34d0c-b8a2-4ebd-b9a0-5485904ecafa	TCGA-CJ-4890	TCGA-CJ-4890-D9952	5442b568-0b8a-4115-8b6d-977e5df77929	40637	Sorafenib	[Not Available]	Targeted Molecular therapy	263	NO	444	[Not Available]	[Not Available]	[Not Available]	[Not Available]	6	[Not Available]	[Not Available]	[Not Available]	[Not Available]	[Not Available]	PO	[Not Available]	[Not Available]	PROGRESSION	[Not Applicable]	[Not Available]	[Not Available]
46d34d0c-b8a2-4ebd-b9a0-5485904ecafa	TCGA-CJ-4890	TCGA-CJ-4890-D9961	e1b40910-8c57-4eda-86a4-5f9508be8fba	40637	Afinitor	[Not Available]	Targeted Molecular therapy	1636	NO	1698	[Not Available]	[Not Available]	[Not Available]	[Not Available]	[Not Available]	[Not Available]	[Not Available]	[Not Available]	[Not Available]	[Not Available]	PO	[Not Available]	[Not Available]	PROGRESSION	[Not Applicable]	[Not Available]	[Not Available]
d1e4f4c0-08cc-4012-9372-9ab987d80dab	TCGA-CJ-4894	TCGA-CJ-4894-D6863	a73eac24-7748-4b45-adba-a6bcf5bdce9c	40571	Interferon	[Not Available]	Immunotherapy	188	NO	240	[Not Available]	[Not Available]	[Not Available]	[Not Available]	3	[Not Available]	[Not Available]	[Not Available]	[Not Available]	[Not Available]	SC	[Not Available]	[Not Available]	RECURRENCE	[Not Applicable]	[Not Available]	[Not Available]
b7994839-77a5-4725-aa58-a9e8c79dbfc2	TCGA-CJ-4895	TCGA-CJ-4895-D6867	9254b0a1-4315-4018-9448-1f18c5680998	40571	Tarceva	[Not Available]	Targeted Molecular therapy	45	NO	228	[Not Available]	[Not Available]	[Not Available]	[Not Available]	[Not Available]	[Not Available]	[Not Available]	[Not Available]	[Not Available]	[Not Available]	PO	[Not Available]	[Not Available]	PROGRESSION	[Not Applicable]	[Not Available]	[Not Available]
b7994839-77a5-4725-aa58-a9e8c79dbfc2	TCGA-CJ-4895	TCGA-CJ-4895-D9290	b59b9c89-24a8-40fc-b23f-e050c4132812	40619	Xeloda	[Not Available]	Chemotherapy	255	NO	740	[Not Available]	[Not Available]	[Not Available]	[Not Available]	[Not Available]	[Not Available]	[Not Available]	[Not Available]	[Not Available]	[Not Available]	PO	[Not Available]	[Not Available]	PROGRESSION	[Not Applicable]	[Not Available]	[Not Available]
b7994839-77a5-4725-aa58-a9e8c79dbfc2	TCGA-CJ-4895	TCGA-CJ-4895-D9286	075290aa-7d9e-4f3b-97ee-e3d43f71dc67	40619	Avastin	[Not Available]	Targeted Molecular therapy	45	NO	559	[Not Available]	[Not Available]	[Not Available]	[Not Available]	[Not Available]	[Not Available]	[Not Available]	[Not Available]	[Not Available]	[Not Available]	IV	[Not Available]	[Not Available]	PROGRESSION	[Not Applicable]	[Not Available]	[Not Available]
b7994839-77a5-4725-aa58-a9e8c79dbfc2	TCGA-CJ-4895	TCGA-CJ-4895-D9288	7c8e6a67-e0f7-400b-9bd9-9acda09df66c	40619	Gemzar	[Not Available]	Chemotherapy	255	NO	740	[Not Available]	[Not Available]	[Not Available]	[Not Available]	[Not Available]	[Not Available]	[Not Available]	[Not Available]	[Not Available]	[Not Available]	IV	[Not Available]	[Not Available]	PROGRESSION	[Not Applicable]	[Not Available]	[Not Available]
33cd8b05-2b9b-40dd-97a2-40d02e27ee90	TCGA-CJ-4900	TCGA-CJ-4900-D6866	4b92ab24-0a69-42aa-8f86-5ed57a8df17e	40572	Tarceva	[Not Available]	Targeted Molecular therapy	-92	NO	0	[Not Available]	[Not Available]	[Not Available]	[Not Available]	3	[Not Available]	[Not Available]	[Not Available]	[Not Available]	[Not Available]	IV|PO	[Not Available]	[Not Available]	OTHER, SPECIFY IN NOTES	Neo-Adjuvant	[Not Available]	[Not Available]
33cd8b05-2b9b-40dd-97a2-40d02e27ee90	TCGA-CJ-4900	TCGA-CJ-4900-D9257	ed2146fb-1aab-4d45-bad3-c656a4aa11b0	40618	Avastin	[Not Available]	Targeted Molecular therapy	-92	NO	0	[Not Available]	[Not Available]	[Not Available]	[Not Available]	3	[Not Available]	[Not Available]	[Not Available]	[Not Available]	[Not Available]	IV	[Not Available]	[Not Available]	OTHER, SPECIFY IN NOTES	Neo-adjuvant	[Not Available]	[Not Available]
ec3b2a30-fcf6-45ef-bd9d-e6089a237c0f	TCGA-CJ-4904	TCGA-CJ-4904-D7281	82b2af25-4930-4748-b53a-cd1ab7fd3097	40582	Nexavar	[Not Available]	Targeted Molecular therapy	295	NO	463	[Not Available]	[Not Available]	[Not Available]	[Not Available]	4	[Not Available]	[Not Available]	[Not Available]	[Not Available]	[Not Available]	PO	[Not Available]	[Not Available]	PROGRESSION	[Not Applicable]	[Not Available]	[Not Available]
f48fc7d5-ca35-4fdf-8150-0ce34f0f6b3e	TCGA-CJ-4913	TCGA-CJ-4913-D7284	c1a1fbd4-8cac-48d7-a3d4-ffe8223e52b9	40582	Sutent	[Not Available]	Targeted Molecular therapy	861	NO	1020	[Not Available]	[Not Available]	[Not Available]	[Not Available]	4	[Not Available]	[Not Available]	[Not Available]	[Not Available]	[Not Available]	PO	[Not Available]	[Not Available]	RECURRENCE	[Not Applicable]	[Not Available]	[Not Available]
267ff78b-bceb-466e-8582-c560fe227ff0	TCGA-CJ-4918	TCGA-CJ-4918-D7290	7cb2bbac-c189-47ae-a6ce-0812f685b88b	40582	Gemcitabine	[Not Available]	Chemotherapy	36	NO	45	[Not Available]	[Not Available]	[Not Available]	[Not Available]	1	[Not Available]	[Not Available]	[Not Available]	[Not Available]	1	IV	[Not Available]	[Not Available]	PROGRESSION	[Not Applicable]	[Not Available]	[Not Available]
25131445-d3cf-46af-b3c5-ca1d1e3561bb	TCGA-CJ-4923	TCGA-CJ-4923-D7292	1b952d0c-b125-40d0-a5ff-1193c55e8313	40582	proleukin (IL-2)	[Not Available]	Immunotherapy	192	NO	379	[Not Available]	[Not Available]	[Not Available]	[Not Available]	6	[Not Available]	[Not Available]	[Not Available]	[Not Available]	[Not Available]	IV	[Not Available]	[Not Available]	PROGRESSION	[Not Applicable]	[Not Available]	[Not Available]
310c31bf-91ce-40b4-99e4-a10242296de9	TCGA-CJ-5676	TCGA-CJ-5676-D10782	7a7b6d14-0d90-436b-9fe0-d65d3bf9a162	40659	pazopanib	[Not Available]	Targeted Molecular therapy	2227	YES	[Not Available]	[Not Available]	[Not Available]	[Not Available]	[Not Available]	[Not Available]	[Not Available]	mg/kg/day	[Not Available]	800	2	PO	[Not Available]	[Not Available]	RECURRENCE	[Not Applicable]	[Not Available]	[Not Available]
310c31bf-91ce-40b4-99e4-a10242296de9	TCGA-CJ-5676	TCGA-CJ-5676-D10768	42bca1a1-845d-44ba-85e9-b6cb7e3fffad	40659	oncophage vaccine	[Not Available]	Other, specify in notes	69	NO	209	[Not Available]	[Not Available]	[Not Available]	[Not Available]	13	Vaccine	[Not Available]	[Not Available]	[Not Available]	1	SC	[Not Available]	[Not Available]	ADJUVANT	[Not Applicable]	[Not Available]	[Not Available]
d2664fde-ce3b-45e6-9a23-4a07980f7bac	TCGA-CJ-5677	TCGA-CJ-5677-D10785	795bcad0-cfa4-4568-9726-bba045ea3853	40659	gemcitabine	[Not Available]	Chemotherapy	70	NO	378	[Not Available]	[Not Available]	[Not Available]	[Not Available]	5	[Not Available]	mg/m2	[Not Available]	600	3	IV	[Not Available]	[Not Available]	PROGRESSION	[Not Applicable]	[Not Available]	[Not Available]
d2664fde-ce3b-45e6-9a23-4a07980f7bac	TCGA-CJ-5677	TCGA-CJ-5677-D10784	fba74882-fb5f-43f2-8edd-945f9ed59003	40659	interferon-alpha	[Not Available]	Immunotherapy	42	NO	70	[Not Available]	[Not Available]	[Not Available]	[Not Available]	2	[Not Available]	[Not Available]	[Not Available]	2	2	SC	[Not Available]	[Not Available]	PROGRESSION	[Not Applicable]	2 million units/day	[Not Available]
d2664fde-ce3b-45e6-9a23-4a07980f7bac	TCGA-CJ-5677	TCGA-CJ-5677-D10783	96ff23fe-4534-42bf-af6f-e7d81301737f	40659	Xeloda	[Not Available]	Chemotherapy	42	NO	70	[Not Available]	[Not Available]	[Not Available]	[Not Available]	2	[Not Available]	g/m2	g/day	1	1	PO	[Not Available]	[Not Available]	PROGRESSION	[Not Applicable]	2	[Not Available]
822cf6c1-dd65-4814-94b1-0c335208ad9b	TCGA-CJ-5678	TCGA-CJ-5678-D10850	e9fb1132-a565-44ed-a4d2-4117f1666ee4	40661	oncophage vaccine	[Not Available]	Other, specify in notes	43	NO	93	[Not Available]	[Not Available]	[Not Available]	[Not Available]	6	[Not Available]	mL	[Not Available]	0.2	1	SC	[Not Available]	[Not Available]	ADJUVANT	[Not Applicable]	[Not Available]	[Not Available]
3fa6c93e-e7fe-402c-9526-c81411aa0920	TCGA-CJ-5679	TCGA-CJ-5679-D10851	02a170ea-b4b2-42e7-840f-cc589ab99671	40661	interferon-alpha	[Not Available]	Immunotherapy	116	NO	274	[Not Available]	[Not Available]	[Not Available]	[Not Available]	[Not Available]	[Not Available]	[Not Available]	[Not Available]	10 million	1	SC	[Not Available]	[Not Available]	PROGRESSION	[Not Applicable]	30 million	[Not Available]
3fa6c93e-e7fe-402c-9526-c81411aa0920	TCGA-CJ-5679	TCGA-CJ-5679-D10852	af2a8ba4-39b6-4e03-ac73-85be416132d1	40661	gemcitabine	[Not Available]	Chemotherapy	274	NO	344	[Not Available]	[Not Available]	[Not Available]	[Not Available]	3	[Not Available]	mg/m2	mg/wk	1000	2	IV	[Not Available]	[Not Available]	PROGRESSION	[Not Applicable]	1970	[Not Available]
3fa6c93e-e7fe-402c-9526-c81411aa0920	TCGA-CJ-5679	TCGA-CJ-5679-D10855	ffd8b92a-6b6b-4cca-bf82-9e943e3237d9	40661	avastin	[Not Available]	Targeted Molecular therapy	344	NO	547	[Not Available]	[Not Available]	[Not Available]	[Not Available]	16	[Not Available]	mg/kg	[Not Available]	10	4	IV	[Not Available]	[Not Available]	PROGRESSION	[Not Applicable]	[Not Available]	[Not Available]
3fa6c93e-e7fe-402c-9526-c81411aa0920	TCGA-CJ-5679	TCGA-CJ-5679-D10856	ea807644-32c7-48bd-b2e8-1cbd56f6b3cf	40661	thalidomide	[Not Available]	Chemotherapy	547	NO	599	[Not Available]	[Not Available]	[Not Available]	[Not Available]	[Not Available]	[Not Available]	mg/day	[Not Available]	100	5	PO	[Not Available]	[Not Available]	PROGRESSION	[Not Applicable]	[Not Available]	[Not Available]
3fa6c93e-e7fe-402c-9526-c81411aa0920	TCGA-CJ-5679	TCGA-CJ-5679-D10853	f4bd6ee0-f8e7-4eba-9a5b-164cd3208007	40662	Xeloda	[Not Available]	Chemotherapy	274	NO	344	[Not Available]	[Not Available]	[Not Available]	[Not Available]	[Not Available]	[Not Available]	[Not Available]	[Not Available]	[Not Available]	3	IV	[Not Available]	[Not Available]	PROGRESSION	[Not Applicable]	[Not Available]	[Not Available]
5db69ebe-38db-4ef3-b825-674b4a6ddaee	TCGA-CJ-5680	TCGA-CJ-5680-D10857	852a6313-ee15-421c-9683-e3b07d970f1d	40661	oncophage vaccine	[Not Available]	Immunotherapy	53	NO	186	[Not Available]	[Not Available]	[Not Available]	[Not Available]	12	[Not Available]	mL	mL	0.2	1	SC	[Not Available]	[Not Available]	ADJUVANT	[Not Applicable]	2.4	[Not Available]
5db69ebe-38db-4ef3-b825-674b4a6ddaee	TCGA-CJ-5680	TCGA-CJ-5680-D10871	67fa6309-b5ad-4f62-a60e-adc3304e2632	40661	IL-2	[Not Available]	Immunotherapy	220	NO	247	[Not Available]	[Not Available]	[Not Available]	[Not Available]	15	[Not Available]	[Not Available]	[Not Available]	49 million	2	IV	[Not Available]	[Not Available]	PROGRESSION	[Not Applicable]	[Not Available]	[Not Available]
5db69ebe-38db-4ef3-b825-674b4a6ddaee	TCGA-CJ-5680	TCGA-CJ-5680-D10874	604063dd-ab5f-4ad4-aa71-072f8af66077	40661	avastin	[Not Available]	Targeted Molecular therapy	275	NO	616	[Not Available]	[Not Available]	[Not Available]	[Not Available]	24	[Not Available]	mg/kg	[Not Available]	10	3	IV	[Not Available]	[Not Available]	PROGRESSION	[Not Applicable]	[Not Available]	[Not Available]
5db69ebe-38db-4ef3-b825-674b4a6ddaee	TCGA-CJ-5680	TCGA-CJ-5680-D12649	a694a74a-e10e-4276-96b5-4d17abfb4681	40699	Tarceva	[Not Available]	Targeted Molecular therapy	466	NO	629	[Not Available]	[Not Available]	[Not Available]	[Not Available]	1	[Not Available]	mg/day	[Not Available]	150	4	PO	[Not Available]	[Not Available]	PROGRESSION	[Not Applicable]	[Not Available]	[Not Available]
2939c03a-6f3f-4f7b-b246-34361baadeb9	TCGA-CJ-5681	TCGA-CJ-5681-D10875	b54c8012-1258-4b9b-8bbb-3899e82aa8e8	40661	IL-2	[Not Available]	Immunotherapy	105	NO	135	[Not Available]	[Not Available]	[Not Available]	[Not Available]	2	[Not Available]	[Not Available]	[Not Available]	[Not Available]	1	IV	[Not Available]	[Not Available]	PROGRESSION	[Not Applicable]	[Not Available]	[Not Available]
2939c03a-6f3f-4f7b-b246-34361baadeb9	TCGA-CJ-5681	TCGA-CJ-5681-D10877	d870b922-3cc1-4273-8cb7-aef6b75eaa13	40661	avastin	[Not Available]	Targeted Molecular therapy	235	NO	318	[Not Available]	[Not Available]	[Not Available]	[Not Available]	4	[Not Available]	mg/kg	[Not Available]	650	3	IV	[Not Available]	[Not Available]	PROGRESSION	[Not Applicable]	[Not Available]	[Not Available]
2939c03a-6f3f-4f7b-b246-34361baadeb9	TCGA-CJ-5681	TCGA-CJ-5681-D10878	24d2fd79-c834-49b6-bb48-616a5f935835	40661	RAD001	[Not Available]	Targeted Molecular therapy	305	NO	365	[Not Available]	[Not Available]	[Not Available]	[Not Available]	[Not Available]	[Not Available]	[Not Available]	[Not Available]	[Not Available]	4	PO	[Not Available]	[Not Available]	PROGRESSION	[Not Applicable]	[Not Available]	[Not Available]
2939c03a-6f3f-4f7b-b246-34361baadeb9	TCGA-CJ-5681	TCGA-CJ-5681-D10876	fd23322f-f22f-47b9-b46b-55f1031aa4a9	40661	gemcitabine	[Not Available]	Chemotherapy	165	NO	235	[Not Available]	[Not Available]	[Not Available]	[Not Available]	3	[Not Available]	mg/kg	[Not Available]	10	2	IV	[Not Available]	[Not Available]	PROGRESSION	[Not Applicable]	[Not Available]	[Not Available]
4c325ee1-9b8e-45d4-a0a7-e47ec1eac402	TCGA-CJ-5682	TCGA-CJ-5682-D10879	6ac833df-b07a-4a38-8395-f41b36572b14	40661	interferon alpha	[Not Available]	Immunotherapy	68	NO	813	[Not Available]	[Not Available]	[Not Available]	[Not Available]	[Not Available]	[Not Available]	[Not Available]	[Not Available]	[Not Available]	1	SC	[Not Available]	[Not Available]	PROGRESSION	[Not Applicable]	[Not Available]	[Not Available]
2890b330-8ba5-4031-bed5-13e9d1d75af9	TCGA-CJ-6028	TCGA-CJ-6028-D14100	a4e4b7e8-5549-4cbe-a05b-ddccae7c87e3	40745	Oncophage	[Not Available]	Other, specify in notes	41	NO	130	[Not Available]	[Not Available]	[Not Available]	[Not Available]	[Not Available]	vaccine	mL	mL	0.4	[Not Available]	SC	[Not Available]	[Not Available]	OTHER, SPECIFY IN NOTES	Treatment of metastatic disease following cytoreductive nephrectomy	3.6	[Not Available]
2890b330-8ba5-4031-bed5-13e9d1d75af9	TCGA-CJ-6028	TCGA-CJ-6028-D14102	d0ce80e2-94c1-40bd-90aa-386450af25c2	40745	Interferon	[Not Available]	Immunotherapy	336	NO	392	[Not Available]	[Not Available]	[Not Available]	[Not Available]	[Not Available]	[Not Available]	[Not Available]	[Not Available]	[Not Available]	[Not Available]	SC	[Not Available]	[Not Available]	PROGRESSION	[Not Applicable]	[Not Available]	[Not Available]
2890b330-8ba5-4031-bed5-13e9d1d75af9	TCGA-CJ-6028	TCGA-CJ-6028-D14113	575516b7-e4d4-44f7-ba47-2853ce7409ee	40745	xeloda	[Not Available]	Chemotherapy	392	NO	903	[Not Available]	[Not Available]	[Not Available]	[Not Available]	2	[Not Available]	mg/m2/day	[Not Available]	1500	[Not Available]	PO	[Not Available]	[Not Available]	PROGRESSION	[Not Applicable]	[Not Available]	[Not Available]
2890b330-8ba5-4031-bed5-13e9d1d75af9	TCGA-CJ-6028	TCGA-CJ-6028-D14115	8cc18e98-54bc-4edb-aed9-fa4d69f9c5bb	40745	Sorafenib	[Not Available]	Targeted Molecular therapy	1033	NO	1625	[Not Available]	[Not Available]	[Not Available]	[Not Available]	[Not Available]	[Not Available]	mg/day	[Not Available]	400	[Not Available]	PO	[Not Available]	[Not Available]	PROGRESSION	[Not Applicable]	[Not Available]	[Not Available]
2890b330-8ba5-4031-bed5-13e9d1d75af9	TCGA-CJ-6028	TCGA-CJ-6028-D14112	efec152d-14e5-41dc-93aa-d91112f20a91	40745	Gemcitabine	[Not Available]	Chemotherapy	392	NO	903	[Not Available]	[Not Available]	[Not Available]	[Not Available]	2	[Not Available]	mg/m2	[Not Available]	600	[Not Available]	PO	[Not Available]	[Not Available]	PROGRESSION	[Not Applicable]	[Not Available]	[Not Available]
2890b330-8ba5-4031-bed5-13e9d1d75af9	TCGA-CJ-6028	TCGA-CJ-6028-D14114	9f0055bf-dd02-48b4-a681-cfa9fd95322c	40745	Sunitinib	[Not Available]	Targeted Molecular therapy	903	NO	1033	[Not Available]	[Not Available]	[Not Available]	[Not Available]	[Not Available]	[Not Available]	[Not Available]	mg/day	[Not Available]	[Not Available]	PO	[Not Available]	[Not Available]	PROGRESSION	[Not Applicable]	50	[Not Available]
4edff57f-4b0e-4770-beac-590da7d7232c	TCGA-CJ-6033	TCGA-CJ-6033-D16327	6c623ee3-2d55-46d5-ae7d-9347dd0a4752	40771	Xeloda	[Not Available]	Chemotherapy	32	NO	74	[Not Available]	[Not Available]	[Not Available]	[Not Available]	2	[Not Available]	mg/day	[Not Available]	2500	[Not Available]	PO	[Not Available]	[Not Available]	OTHER, SPECIFY IN NOTES	Treatment of metastatic disease following cytoreductive nephrectomy	[Not Available]	[Not Available]
4edff57f-4b0e-4770-beac-590da7d7232c	TCGA-CJ-6033	TCGA-CJ-6033-D16328	4f5e45e8-f08e-4def-a405-7c6128d41653	40802	Avastin	[Not Available]	Targeted Molecular therapy	81	NO	144	[Not Available]	[Not Available]	[Not Available]	[Not Available]	[Not Available]	[Not Available]	mg/kg	[Not Available]	10	[Not Available]	IV	[Not Available]	[Not Available]	OTHER, SPECIFY IN NOTES	metistatic disease	[Not Available]	[Not Available]
4edff57f-4b0e-4770-beac-590da7d7232c	TCGA-CJ-6033	TCGA-CJ-6033-D16330	1a8e76f1-de11-4c9b-96d3-71a05c0e2f39	40802	Interferon	[Not Available]	Immunotherapy	144	NO	172	[Not Available]	[Not Available]	[Not Available]	[Not Available]	[Not Available]	[Not Available]	[Not Available]	[Not Available]	500000	[Not Available]	SC	[Not Available]	[Not Available]	PROGRESSION	[Not Applicable]	[Not Available]	[Not Available]
4edff57f-4b0e-4770-beac-590da7d7232c	TCGA-CJ-6033	TCGA-CJ-6033-D16326	361f2192-be38-459e-919f-e7fcd6f19a6b	40802	Gemcitabine	[Not Available]	Chemotherapy	32	NO	74	[Not Available]	[Not Available]	[Not Available]	[Not Available]	2	[Not Available]	mg/m2/day	[Not Available]	600	[Not Available]	IV	[Not Available]	[Not Available]	OTHER, SPECIFY IN NOTES	Treatment of metastatic disease following cytoreductive nephrectomy	[Not Available]	[Not Available]
4edff57f-4b0e-4770-beac-590da7d7232c	TCGA-CJ-6033	TCGA-CJ-6033-D16329	71a0a459-12f4-4fca-bb66-42ce0f871f34	40802	Iressa	[Not Available]	Targeted Molecular therapy	74	NO	144	[Not Available]	[Not Available]	[Not Available]	[Not Available]	[Not Available]	[Not Available]	mg/day	[Not Available]	250	[Not Available]	PO	[Not Available]	[Not Available]	OTHER, SPECIFY IN NOTES	metistatic disease	[Not Available]	[Not Available]
88fc4bc4-32cf-4d92-8c29-20d920b8f719	TCGA-CW-5580	TCGA-CW-5580-D8584	b1ebaccd-72cc-42a8-9286-50085222d185	40603	IFN-Alpha (Intron)	[Not Available]	Immunotherapy	50	NO	57	[Not Available]	[Not Available]	[Not Available]	[Not Available]	[Not Available]	[Not Available]	[Not Available]	[Not Available]	[Not Available]	[Not Available]	[Not Available]	[Not Available]	[Not Available]	[Not Available]	[Not Applicable]	[Not Available]	[Not Available]
0487fc41-386c-4d76-9084-daf959bf5e98	TCGA-CW-5585	TCGA-CW-5585-D8594	9adc6edd-2e8a-41ce-a364-51a4b140feaa	40603	Sutent (Sunitinib)	[Not Available]	Targeted Molecular therapy	2563	[Not Available]	[Not Available]	[Not Available]	[Not Available]	[Not Available]	[Not Available]	[Not Available]	[Not Available]	[Not Available]	[Not Available]	[Not Available]	[Not Available]	[Not Available]	[Not Available]	[Not Available]	[Not Available]	[Not Applicable]	[Not Available]	[Not Available]
9fd9104b-a26d-44c7-bb45-f1edd76d0aa0	TCGA-CW-5590	TCGA-CW-5590-D8614	1ca0a85b-5ae1-4a31-b005-c1fcf6d6520c	40603	Sutent (Sunitinib)	[Not Available]	Other, specify in notes	229	NO	956	[Not Available]	[Not Available]	[Not Available]	[Not Available]	[Not Available]	SU011248	[Not Available]	[Not Available]	[Not Available]	[Not Available]	[Not Available]	[Not Available]	[Not Available]	[Not Available]	[Not Applicable]	[Not Available]	[Not Available]
f1ae0181-74f8-47fd-83be-83a7d01101cc	TCGA-CW-5591	TCGA-CW-5591-D8621	ecc5564d-d0e9-4b6a-9377-90a001040e2c	40603	IL-2 (high dose)	[Not Available]	Immunotherapy	78	[Not Available]	[Not Available]	[Not Available]	[Not Available]	[Not Available]	[Not Available]	[Not Available]	[Not Available]	[Not Available]	[Not Available]	[Not Available]	[Not Available]	[Not Available]	[Not Available]	[Not Available]	[Not Available]	[Not Applicable]	[Not Available]	[Not Available]
5f53ace3-14ca-412a-af6c-98d8996f8177	TCGA-CW-6097	TCGA-CW-6097-D12249	f98c52fa-e5ad-4e18-ba98-dd31d1b92347	40689	Bay-439006	[Not Available]	Other, specify in notes	115	NO	[Not Available]	[Not Available]	[Not Available]	[Not Available]	[Not Available]	[Not Available]	clinical trial	[Not Available]	[Not Available]	[Not Available]	[Not Available]	[Not Available]	[Not Available]	[Not Available]	PROGRESSION	[Not Applicable]	[Not Available]	[Not Available]
d5213422-9447-4f62-b486-3303e3f991fa	TCGA-CZ-4857	TCGA-CZ-4857-D7709	95cecfe0-ba80-4008-866f-7174a86b8bf5	40588	IL-2 Therapy (interleukin)	[Not Available]	Other, specify in notes	228	NO	247	[Not Available]	[Not Available]	[Not Available]	[Not Available]	1	Biological Therapy	[iU]/kg	[iU]/kg	[Not Available]	[Not Available]	IV	[Not Available]	[Not Available]	[Not Available]	[Not Applicable]	1177	[Not Available]
f06bdea2-4528-4a14-9cea-280af6b4c702	TCGA-CZ-4858	TCGA-CZ-4858-D7716	6e51f78f-a493-4217-a249-35ddd5602891	40588	Interleukin 2-high dose	[Not Available]	Other, specify in notes	1694	NO	1715	[Not Available]	[Not Available]	[Not Available]	[Not Available]	2	Biological Therapy	[iU]/kg	[iU]/kg	600	[Not Available]	IV	[Not Available]	[Not Available]	PROGRESSION	[Not Applicable]	1360	[Not Available]
6949efc1-4f71-4141-b129-a54b4bde5d2f	TCGA-CZ-4860	TCGA-CZ-4860-D7726	b9f157fa-713b-4fb9-b671-f5f15b0f1bac	40588	sorafenib	[Not Available]	Targeted Molecular therapy	53	NO	132	[Not Available]	[Not Available]	[Not Available]	[Not Available]	[Not Available]	[Not Available]	[Not Available]	[Not Available]	[Not Available]	[Not Available]	PO	[Not Available]	[Not Available]	PROGRESSION	[Not Applicable]	[Not Available]	[Not Available]
226ce515-c12c-4195-bb5d-d6df2e135ff6	TCGA-CZ-4861	TCGA-CZ-4861-D20605	689f0d94-bd0a-4fc4-a67a-046aa3514ef9	40926	Sorafenib - Nexavar	[Not Available]	Targeted Molecular therapy	-43	NO	32	[Not Available]	[Not Available]	[Not Available]	[Not Available]	1	[Not Available]	[Not Available]	[Not Available]	[Not Available]	[Not Available]	PO	[Not Available]	[Not Available]	OTHER, SPECIFY IN NOTES	neoadjuvant	[Not Available]	[Not Available]
f2801b21-5444-4cc3-a642-c60c6d82cd3d	TCGA-CZ-5454	TCGA-CZ-5454-D8994	e9789b15-22f2-4464-98f1-4cf7ecbe2e15	40612	sutent (sunitinib)	[Not Available]	Targeted Molecular therapy	37	NO	324	[Not Available]	[Not Available]	[Not Available]	[Not Available]	7	[Not Available]	mg/day	mg	37.5	[Not Available]	PO	[Not Available]	[Not Available]	PROGRESSION	[Not Applicable]	8925	[Not Available]
467bf226-a646-4217-bce6-8d0f11c756eb	TCGA-CZ-5456	TCGA-CZ-5456-D9019	164714d6-5bec-464c-885c-4d81682616cd	40613	Pazopanib	[Not Available]	Targeted Molecular therapy	1124	NO	1286	[Not Available]	[Not Available]	[Not Available]	[Not Available]	4	[Not Available]	mg	[Not Available]	800	[Not Available]	PO	[Not Available]	[Not Available]	PROGRESSION	[Not Applicable]	[Not Available]	[Not Available]
a7ddd737-714d-423f-8fb5-5a932d014487	TCGA-CZ-5460	TCGA-CZ-5460-D9029	f2fe44fb-e4b3-4b41-8fbd-6c99c5b15dfa	40613	interleukin-2	[Not Available]	Other, specify in notes	174	NO	298	[Not Available]	[Not Available]	[Not Available]	[Not Available]	2	Biological Therapy	[iU]/kg	[iU]/kg	600000	[Not Available]	IV	[Not Available]	[Not Available]	PROGRESSION	[Not Applicable]	2138	[Not Available]
393abcf7-1155-4b32-85ca-cd44d259e4b4	TCGA-CZ-5461	TCGA-CZ-5461-D9042	ad2f500b-aa23-44fe-86c6-2c45706d2065	40613	sunitinib (sutent)	[Not Available]	Targeted Molecular therapy	45	NO	278	[Not Available]	[Not Available]	[Not Available]	[Not Available]	5	[Not Available]	mg/day	mg	50	[Not Available]	PO	[Not Available]	[Not Available]	PROGRESSION	[Not Applicable]	7000	[Not Available]
e0127e51-43ba-4536-bc9d-004591f9c627	TCGA-CZ-5462	TCGA-CZ-5462-D9045	71a635c2-508f-4151-b41c-0542821055e0	40613	sunitinib	[Not Available]	Chemotherapy	15	NO	127	[Not Available]	[Not Available]	[Not Available]	[Not Available]	[Not Available]	[Not Available]	mg/day	[Not Available]	50	[Not Available]	PO	[Not Available]	[Not Available]	PROGRESSION	[Not Applicable]	[Not Available]	[Not Available]
6b79d20c-d5bc-4580-837e-b36dfd0c199c	TCGA-CZ-5464	TCGA-CZ-5464-D9059	a7793c40-e76c-4b4e-92da-e30f7a1c58b2	40613	sunitinib	[Not Available]	Targeted Molecular therapy	52	NO	571	[Not Available]	[Not Available]	[Not Available]	[Not Available]	[Not Available]	[Not Available]	mg/day	[Not Available]	50	[Not Available]	PO	[Not Available]	[Not Available]	PROGRESSION	[Not Applicable]	[Not Available]	[Not Available]
6b79d20c-d5bc-4580-837e-b36dfd0c199c	TCGA-CZ-5464	TCGA-CZ-5464-D19220	27449df9-bfc7-40cf-a102-4e3024f8b6b0	40883	Pazopanib	[Not Available]	Targeted Molecular therapy	1407	NO	1730	[Not Available]	[Not Available]	[Not Available]	[Not Available]	[Not Available]	[Not Available]	mg	[Not Available]	800	[Not Available]	PO	[Not Available]	[Not Available]	PROGRESSION	[Not Applicable]	[Not Available]	[Not Available]
6205c2d8-d431-4c4c-8ac6-ee407170e833	TCGA-CZ-5469	TCGA-CZ-5469-D9073	51e67e71-cb66-4363-b6fb-7c6cb7037aed	40613	sunitinib	[Not Available]	Targeted Molecular therapy	223	NO	597	[Not Available]	[Not Available]	[Not Available]	[Not Available]	[Not Available]	[Not Available]	mg/day	[Not Available]	37.5	[Not Available]	PO	[Not Available]	[Not Available]	PROGRESSION	[Not Applicable]	[Not Available]	[Not Available]
f6d28a1d-6691-4ac1-8afb-ab0e7dcef867	TCGA-DV-5565	TCGA-DV-5565-D13877	aff45daf-b926-4e59-80ac-70ba3f35d908	40742	ZD6474	[Not Available]	Targeted Molecular therapy	1189	YES	[Not Available]	[Not Available]	[Not Available]	[Not Available]	[Not Available]	6	[Not Available]	mg	[Not Available]	200	1	PO	[Not Available]	[Not Available]	RECURRENCE	[Not Applicable]	[Not Available]	[Not Available]
EF2D7EF5-CDFC-48C9-B3FE-6EAF3BE1106D	TCGA-DV-A4VX	TCGA-DV-A4VX-D39044	7880BC8A-7E1D-42DB-A721-6B336D67A093	41611	Sunitinib	[Not Available]	Targeted Molecular therapy	56	NO	482	Stable Disease	[Not Available]	[Not Available]	[Not Available]	[Not Available]	[Not Available]	[Not Available]	[Not Available]	[Not Available]	[Not Available]	[Not Available]	[Not Available]	[Not Available]	[Not Available]	[Not Applicable]	[Not Available]	YES
EF2D7EF5-CDFC-48C9-B3FE-6EAF3BE1106D	TCGA-DV-A4VX	TCGA-DV-A4VX-D39045	0E637E76-7F7E-442D-B3DE-F1737B52A179	41611	Sorafenib	[Not Available]	Targeted Molecular therapy	482	NO	1503	Clinical Progressive Disease	[Not Available]	[Not Available]	[Not Available]	[Not Available]	[Not Available]	[Not Available]	[Not Available]	[Not Available]	[Not Available]	[Not Available]	[Not Available]	[Not Available]	[Not Available]	[Not Applicable]	[Not Available]	YES
3F0A2571-C088-4735-8152-61F6FD60AC63	TCGA-G6-A5PC	TCGA-G6-A5PC-D44703	5DC3019B-3C23-44EF-9AE9-FF381CF2320F	41450	Sutent	[Not Available]	Targeted Molecular therapy	62	NO	208	Clinical Progressive Disease	[Not Available]	[Not Available]	[Not Available]	[Not Available]	[Not Available]	[Not Available]	[Not Available]	[Not Available]	[Not Available]	[Not Available]	[Not Available]	[Not Available]	[Not Available]	[Not Applicable]	[Not Available]	NO
28011111-4A01-4CDC-8D6B-7223FB2C501B	TCGA-G6-A8L6	TCGA-G6-A8L6-D58227	8CA2D5C3-74D7-46B8-BA9B-52BEB3D62017	41731	Avastin	[Not Available]	Immunotherapy	276	YES	[Not Available]	[Not Applicable]	[Not Available]	[Not Available]	[Not Available]	[Not Available]	[Not Available]	[Not Available]	[Not Available]	[Not Available]	[Not Available]	[Not Available]	[Not Available]	[Not Available]	[Not Available]	[Not Applicable]	[Not Available]	NO
28011111-4A01-4CDC-8D6B-7223FB2C501B	TCGA-G6-A8L6	TCGA-G6-A8L6-D58225	2D08B0B9-FCAE-43BE-92B4-1D58B09E5E00	41732	Sutent	[Not Available]	Chemotherapy	73	NO	211	Stable Disease	[Not Available]	[Not Available]	[Not Available]	[Not Available]	[Not Available]	[Not Available]	[Not Available]	[Not Available]	[Not Available]	[Not Available]	[Not Available]	[Not Available]	[Not Available]	[Not Applicable]	[Not Available]	NO
28011111-4A01-4CDC-8D6B-7223FB2C501B	TCGA-G6-A8L6	TCGA-G6-A8L6-D58226	55CA8E78-C80B-4957-8A71-16D55025F6D7	41732	Axitnib	[Not Available]	Chemotherapy	252	NO	272	Stable Disease	[Not Available]	[Not Available]	[Not Available]	[Not Available]	[Not Available]	[Not Available]	[Not Available]	[Not Available]	[Not Available]	[Not Available]	[Not Available]	[Not Available]	[Not Available]	[Not Applicable]	[Not Available]	NO

## Sheet: LGG
bcr_patient_uuid	bcr_patient_barcode	bcr_drug_barcode	bcr_drug_uuid	form_completion_date	pharmaceutical_therapy_drug_name	clinical_trial_drug_classification	pharmaceutical_therapy_type	pharmaceutical_tx_started_days_to	pharmaceutical_tx_ongoing_indicator	pharmaceutical_tx_ended_days_to	treatment_best_response	days_to_stem_cell_transplantation	pharm_regimen	pharm_regimen_other	pharma_adjuvant_cycles_count	pharma_type_other	pharmaceutical_tx_dose_units	pharmaceutical_tx_total_dose_units	prescribed_dose	regimen_number	route_of_administration	stem_cell_transplantation	stem_cell_transplantation_type	therapy_regimen	therapy_regimen_other	total_dose	tx_on_clinical_trial
bcr_patient_uuid	bcr_patient_barcode	bcr_drug_barcode	bcr_drug_uuid	form_completion_date	drug_name	clinical_trail_drug_classification	therapy_type	days_to_drug_therapy_start	therapy_ongoing	days_to_drug_therapy_end	measure_of_response	days_to_stem_cell_transplantation	pharm_regimen	pharm_regimen_other	number_cycles	therapy_type_notes	prescribed_dose_units	total_dose_units	prescribed_dose	regimen_number	route_of_administration	stem_cell_transplantation	stem_cell_transplantation_type	regimen_indication	regimen_indication_notes	total_dose	tx_on_clinical_trial
CDE_ID:	CDE_ID:2003301	CDE_ID:	CDE_ID:	CDE_ID:	CDE_ID:2975232	CDE_ID:3378323	CDE_ID:2793530	CDE_ID:3392465	CDE_ID:3103479	CDE_ID:3392470	CDE_ID:2857291	CDE_ID:3414613	CDE_ID:3366758	CDE_ID:3366930	CDE_ID:62590	CDE_ID:2001762	CDE_ID:3065815	CDE_ID:3088785	CDE_ID:2184728	CDE_ID:2744948	CDE_ID:2003586	CDE_ID:3090688	CDE_ID:2730901	CDE_ID:2793511	CDE_ID:2793516	CDE_ID:1515	CDE_ID:3925111
fc222f23-b3b2-4ac0-bc61-e8e8fa5cc160	TCGA-CS-4941	TCGA-CS-4941-D19325	5fa9ba75-3196-4fba-a773-77e500473c2f	40885	Temodar	[Not Available]	Chemotherapy	[Not Available]	NO	[Not Available]	[Not Available]	[Not Available]	[Not Available]	[Not Available]	[Not Available]	[Not Available]	mg	mg	[Not Available]	1	PO	[Not Available]	[Not Available]	ADJUVANT	[Not Applicable]	[Not Available]	[Not Available]
230f5fa7-aa36-41ea-b40b-08f520767bd5	TCGA-CS-4942	TCGA-CS-4942-D17619	c4d4f444-f628-43f4-8983-ff68f99b4bb0	40835	Avastin	[Not Available]	Chemotherapy	1241	NO	1260	[Not Available]	[Not Available]	[Not Available]	[Not Available]	6	[Not Available]	mg	mg	800	[Not Available]	IV	[Not Available]	[Not Available]	PROGRESSION	[Not Applicable]	4800	[Not Available]
952dfd5d-e65a-4307-b6a9-2ed2b0d2d9ce	TCGA-CS-4943	TCGA-CS-4943-D10215	442c5dd3-d3e9-4c63-8979-b2db1ad4b768	40645	Temodar	[Not Available]	Chemotherapy	408	YES	[Not Available]	[Not Available]	[Not Available]	[Not Available]	[Not Available]	[Not Available]	[Not Available]	[Not Available]	[Not Available]	[Not Available]	[Not Available]	PO	[Not Available]	[Not Available]	ADJUVANT	[Not Applicable]	[Not Available]	[Not Available]
c6cf2b8e-40ed-4c9f-8419-d868bd5afe11	TCGA-CS-5390	TCGA-CS-5390-D15570	db6ba6a3-3a44-4ecb-919e-282d78f1412a	40780	Temodar	[Not Available]	Chemotherapy	886	[Not Available]	[Not Available]	[Not Available]	[Not Available]	[Not Available]	[Not Available]	[Not Available]	[Not Available]	mg	[Not Available]	300	1	PO	[Not Available]	[Not Available]	ADJUVANT	[Not Applicable]	[Not Available]	[Not Available]
e8d3d888-e5fc-4469-ad0b-2c1df6e04790	TCGA-CS-5393	TCGA-CS-5393-D15814	a037675e-cddc-4cdd-ab75-9221e715ca61	40773	Temodar	[Not Available]	Chemotherapy	[Not Available]	NO	[Not Available]	[Not Available]	[Not Available]	[Not Available]	[Not Available]	5	[Not Available]	mg	mg	140	[Not Available]	PO	[Not Available]	[Not Available]	ADJUVANT	[Not Applicable]	[Not Available]	[Not Available]
f86fa219-34e9-4812-8edf-2b66d7219779	TCGA-CS-5395	TCGA-CS-5395-D10076	f6605382-bfa1-4648-bbe1-4da6295aa7a8	40615	Bevacizumab	[Not Available]	Chemotherapy	411	NO	579	[Not Available]	[Not Available]	[Not Available]	[Not Available]	11	[Not Available]	mg	mg	980	[Not Available]	IV	[Not Available]	[Not Available]	PROGRESSION	[Not Applicable]	10780	[Not Available]
f86fa219-34e9-4812-8edf-2b66d7219779	TCGA-CS-5395	TCGA-CS-5395-D19845	135a69bd-6cdb-45f9-b1d7-f698b8fea52a	40906	Temodar	[Not Available]	Chemotherapy	259	NO	[Not Available]	[Not Available]	[Not Available]	[Not Available]	[Not Available]	[Not Available]	[Not Available]	mg	mg	100	1	PO	[Not Available]	[Not Available]	ADJUVANT	[Not Applicable]	[Not Available]	[Not Available]
b6c2c9bd-625b-4a98-830c-49c344f6cb5f	TCGA-CS-5396	TCGA-CS-5396-D15818	7b80fb67-5c9f-4889-bab8-a973e53717f1	40787	Temodar	[Not Available]	Chemotherapy	39	YES	[Not Available]	[Not Available]	[Not Available]	[Not Available]	[Not Available]	[Not Available]	[Not Available]	mg	mg	360	1	PO	[Not Available]	[Not Available]	ADJUVANT	[Not Applicable]	[Not Available]	[Not Available]
bdfade49-9059-4665-beea-c55117ba6564	TCGA-CS-5397	TCGA-CS-5397-D17569	884d36f1-3c32-4867-8f9f-9f0421d6362b	40809	Temodar	[Not Available]	Chemotherapy	8	NO	[Not Available]	[Not Available]	[Not Available]	[Not Available]	[Not Available]	[Not Available]	[Not Available]	mg	mg	[Not Available]	1	PO	[Not Available]	[Not Available]	ADJUVANT	[Not Applicable]	[Not Available]	[Not Available]
9ee6e821-3af2-42d7-9d14-f0ca455f338c	TCGA-CS-6186	TCGA-CS-6186-D18645	0799781a-105d-437e-afb2-6381b42c5e39	40865	Temodar	[Not Available]	Chemotherapy	146	NO	188	[Not Available]	[Not Available]	[Not Available]	[Not Available]	[Not Available]	[Not Available]	mg	mg	100	1	PO	[Not Available]	[Not Available]	ADJUVANT	[Not Applicable]	[Not Available]	[Not Available]
9ee6e821-3af2-42d7-9d14-f0ca455f338c	TCGA-CS-6186	TCGA-CS-6186-D18648	dd8b100d-1cdd-436e-af4e-d2b268c97f3c	40865	Avastin	[Not Available]	Chemotherapy	444	NO	512	[Not Available]	[Not Available]	[Not Available]	[Not Available]	8	[Not Available]	mg	mg	840	2	IV	[Not Available]	[Not Available]	RECURRENCE	[Not Applicable]	6720	[Not Available]
3f70c3e3-0131-466f-92aa-0a63ab3d4258	TCGA-CS-6188	TCGA-CS-6188-D17678	0d299bff-323c-4529-b028-86571ff11176	40809	Temodar	[Not Available]	Chemotherapy	71	NO	716	[Not Available]	[Not Available]	[Not Available]	[Not Available]	[Not Available]	[Not Available]	mg	mg	400	1	PO	[Not Available]	[Not Available]	ADJUVANT	[Not Applicable]	[Not Available]	[Not Available]
42fe260f-520b-4fac-8c09-d2b31aed59fb	TCGA-CS-6290	TCGA-CS-6290-D17566	4b47d8fe-0c26-4476-9676-c2bcc77004ec	40829	Temodar	[Not Available]	Chemotherapy	[Not Available]	NO	504	[Not Available]	[Not Available]	[Not Available]	[Not Available]	12	[Not Available]	mg	mg	400	1	PO	[Not Available]	[Not Available]	ADJUVANT	[Not Applicable]	[Not Available]	[Not Available]
c16d9f69-26f9-4ec7-b2d5-ff9f7dacfe0f	TCGA-CS-6665	TCGA-CS-6665-D17574	c3b5ee73-099a-47c3-abb8-c0dcca5e0033	40829	Temodar	[Not Available]	Chemotherapy	6	YES	[Not Available]	[Not Available]	[Not Available]	[Not Available]	[Not Available]	[Not Available]	[Not Available]	mg	mg	250	1	PO	[Not Available]	[Not Available]	ADJUVANT	[Not Applicable]	[Not Available]	[Not Available]
8cba230b-46db-4d35-8123-3879eba32402	TCGA-CS-6666	TCGA-CS-6666-D17578	e4bada7d-4627-43bb-9c13-8188395833ad	40810	Temodar	[Not Available]	Chemotherapy	32	YES	[Not Available]	[Not Available]	[Not Available]	[Not Available]	[Not Available]	[Not Available]	[Not Available]	mg	mg	[Not Available]	1	PO	[Not Available]	[Not Available]	ADJUVANT	[Not Applicable]	[Not Available]	[Not Available]
a5d3f3fb-6541-419d-b47e-720d438f1bff	TCGA-CS-6668	TCGA-CS-6668-D17586	ae31a013-3c31-42fe-9b59-da0d0280a6fc	40810	Temodar	[Not Available]	Chemotherapy	27	YES	[Not Available]	[Not Available]	[Not Available]	[Not Available]	[Not Available]	[Not Available]	[Not Available]	mg	mg	[Not Available]	1	PO	[Not Available]	[Not Available]	ADJUVANT	[Not Applicable]	[Not Available]	[Not Available]
dc5bdd21-b23f-400e-bbe2-4c98a517fc9e	TCGA-CS-6669	TCGA-CS-6669-D17590	3f8e0599-a4ec-47cd-8894-5db97c17437c	40810	Temodar	[Not Available]	Chemotherapy	30	YES	[Not Available]	[Not Available]	[Not Available]	[Not Available]	[Not Available]	[Not Available]	[Not Available]	mg	mg	[Not Available]	1	PO	[Not Available]	[Not Available]	ADJUVANT	[Not Applicable]	[Not Available]	[Not Available]
60b30a95-3e4c-413a-9de6-16a5bca163c4	TCGA-CS-6670	TCGA-CS-6670-D19946	99349bbe-c046-49b0-a59f-b228a4426aae	40913	Temodar	[Not Available]	Chemotherapy	68	NO	201	[Not Available]	[Not Available]	[Not Available]	[Not Available]	[Not Available]	[Not Available]	mg	mg	160	4	PO	[Not Available]	[Not Available]	ADJUVANT	[Not Applicable]	[Not Available]	[Not Available]
60b30a95-3e4c-413a-9de6-16a5bca163c4	TCGA-CS-6670	TCGA-CS-6670-D19945	ac52a959-5315-4264-9d65-a69cafb15e1a	40913	Vinblastine	[Not Available]	Chemotherapy	-49	NO	-30	[Not Available]	[Not Available]	[Not Available]	[Not Available]	2	[Not Available]	mg	mg	2	3	IV	[Not Available]	[Not Available]	OTHER, SPECIFY IN NOTES	Neo-Adjuvant	4	[Not Available]
60b30a95-3e4c-413a-9de6-16a5bca163c4	TCGA-CS-6670	TCGA-CS-6670-D19944	25b4ae45-fb44-43d8-8cf3-95b10f64f46c	40913	Avastin	[Not Available]	Chemotherapy	-325	NO	-227	[Not Available]	[Not Available]	[Not Available]	[Not Available]	5	[Not Available]	mg	mg	1000	2	IV	[Not Available]	[Not Available]	OTHER, SPECIFY IN NOTES	Neo-Adjuvant	5000	[Not Available]
b7cd3b44-ef6a-4207-a44f-14f5b3b56ed4	TCGA-DB-5270	TCGA-DB-5270-D14213	8ec0b3e1-0428-4a80-97a0-39638ce7d944	40746	BCNU	[Not Available]	Chemotherapy	761	NO	917	[Not Available]	[Not Available]	[Not Available]	[Not Available]	3	[Not Available]	mg/m2	mg	200	1	IV	[Not Available]	[Not Available]	RECURRENCE	[Not Applicable]	1080	[Not Available]
ae2db022-eb4f-4b65-89b6-9fd4439ddeef	TCGA-DB-5273	TCGA-DB-5273-D14441	550b69bc-23b1-44c5-be57-7ecb3c5808a7	2011-7-00	Temodar	[Not Available]	Chemotherapy	74	NO	302	[Not Available]	[Not Available]	[Not Available]	[Not Available]	6	[Not Available]	mg/m2	mg	200	1	PO	[Not Available]	[Not Available]	ADJUVANT	[Not Applicable]	12450	[Not Available]
ae2db022-eb4f-4b65-89b6-9fd4439ddeef	TCGA-DB-5273	TCGA-DB-5273-D14250	0639f52e-b0e8-4d1f-b84f-1f89647234c7	40746	Temodar	[Not Available]	Chemotherapy	17	NO	74	[Not Available]	[Not Available]	[Not Available]	[Not Available]	6	[Not Available]	mg/m2	mg	75	1	PO	[Not Available]	[Not Available]	ADJUVANT	[Not Applicable]	6720	[Not Available]
0b54cda4-7568-481e-b0c6-2c5c6de0026c	TCGA-DB-5274	TCGA-DB-5274-D14422	9f32c049-4894-4377-a066-ae609c40a0ef	40746	Temodar	[Not Available]	Chemotherapy	98	NO	270	[Not Available]	[Not Available]	[Not Available]	[Not Available]	6	[Not Available]	mg/m2	mg	200	1	PO	[Not Available]	[Not Available]	ADJUVANT	[Not Applicable]	10800	[Not Available]
0b54cda4-7568-481e-b0c6-2c5c6de0026c	TCGA-DB-5274	TCGA-DB-5274-D14421	c7e43fb6-4054-47f5-b360-9c8c0357383e	40746	Temodar	[Not Available]	Chemotherapy	52	NO	98	[Not Available]	[Not Available]	[Not Available]	[Not Available]	6	[Not Available]	mg/m2	mg	75	1	PO	[Not Available]	[Not Available]	ADJUVANT	[Not Applicable]	5670	[Not Available]
bbfb5399-8d43-4b75-bf90-23ec142697d7	TCGA-DB-5275	TCGA-DB-5275-D14426	e91c5836-1333-44d8-960e-24db52d231d9	40746	Temodar	[Not Available]	Chemotherapy	72	NO	129	[Not Available]	[Not Available]	[Not Available]	[Not Available]	6	[Not Available]	mg/m2	mg	75	1	PO	[Not Available]	[Not Available]	ADJUVANT	[Not Applicable]	6300	[Not Available]
bbfb5399-8d43-4b75-bf90-23ec142697d7	TCGA-DB-5275	TCGA-DB-5275-D14430	cb6f0480-725d-4ef7-979e-e0f5799383bd	40746	Temodar	[Not Available]	Chemotherapy	129	NO	359	[Not Available]	[Not Available]	[Not Available]	[Not Available]	7	[Not Available]	mg/m2	mg	200	1	PO	[Not Available]	[Not Available]	ADJUVANT	[Not Applicable]	14000	[Not Available]
9d0c1552-00a7-4f0a-a04a-a82e721ee4e3	TCGA-DB-5276	TCGA-DB-5276-D14435	cf5efc36-9230-4008-a50c-1f5d89ca5c64	2011-7-00	Temodar	[Not Available]	Chemotherapy	69	NO	283	[Not Available]	[Not Available]	[Not Available]	[Not Available]	6	[Not Available]	mg/m2	mg	200	1	PO	[Not Available]	[Not Available]	ADJUVANT	[Not Applicable]	9000	[Not Available]
9d0c1552-00a7-4f0a-a04a-a82e721ee4e3	TCGA-DB-5276	TCGA-DB-5276-D14433	d0517edd-ec4b-4404-a060-e8fe19782140	2011-7-00	Temodar	[Not Available]	Chemotherapy	12	NO	69	[Not Available]	[Not Available]	[Not Available]	[Not Available]	6	[Not Available]	mg/m2	mg	75	1	PO	[Not Available]	[Not Available]	ADJUVANT	[Not Applicable]	6510	[Not Available]
9d0c1552-00a7-4f0a-a04a-a82e721ee4e3	TCGA-DB-5276	TCGA-DB-5276-D15525	a0a1954b-de5b-479d-92f5-dcab0a809a1d	40777	Gleevec	[Not Available]	Targeted Molecular therapy	1011	NO	1189	[Not Available]	[Not Available]	[Not Available]	[Not Available]	6	[Not Available]	mg	[Not Available]	600	2	PO	[Not Available]	[Not Available]	PROGRESSION	[Not Applicable]	[Not Available]	[Not Available]
9d0c1552-00a7-4f0a-a04a-a82e721ee4e3	TCGA-DB-5276	TCGA-DB-5276-D15527	9509ff37-b028-4b82-8039-a62706ff87c8	40777	Gleevec	[Not Available]	Targeted Molecular therapy	1196	NO	1342	[Not Available]	[Not Available]	[Not Available]	[Not Available]	5	[Not Available]	mg	[Not Available]	300	2	PO	[Not Available]	[Not Available]	PROGRESSION	[Not Applicable]	[Not Available]	[Not Available]
d05079f2-9883-46e6-ad06-9e561f08d819	TCGA-DB-5277	TCGA-DB-5277-D14420	cbc335aa-955f-443f-b8db-b8466075d2e3	40746	Temodar	[Not Available]	Chemotherapy	91	NO	361	[Not Available]	[Not Available]	[Not Available]	[Not Available]	9	[Not Available]	mg/m2	mg	110	1	PO	[Not Available]	[Not Available]	ADJUVANT	[Not Applicable]	9900	[Not Available]
d05079f2-9883-46e6-ad06-9e561f08d819	TCGA-DB-5277	TCGA-DB-5277-D14419	b8d13d9f-90f4-43c2-b5fc-2f55941c5b20	40746	Temodar	[Not Available]	Chemotherapy	27	NO	61	[Not Available]	[Not Available]	[Not Available]	[Not Available]	5	[Not Available]	mg/m2/day	mg	75	1	PO	[Not Available]	[Not Available]	ADJUVANT	[Not Applicable]	5250	[Not Available]
d05079f2-9883-46e6-ad06-9e561f08d819	TCGA-DB-5277	TCGA-DB-5277-D15524	9adc1973-ccc6-446b-a88e-66582277fa98	40777	Temozolamide	[Not Available]	Chemotherapy	1117	NO	1239	[Not Available]	[Not Available]	[Not Available]	[Not Available]	[Not Available]	[Not Available]	mg	[Not Available]	[Not Available]	2	PO	[Not Available]	[Not Available]	PROGRESSION	[Not Applicable]	[Not Available]	[Not Available]
15a6ad18-a81c-4f5b-80ae-ef56ccf722f9	TCGA-DB-5281	TCGA-DB-5281-D14439	e7a75c37-6dc9-4fce-8b89-f4421fbc89c1	2011-7-00	Temodar	[Not Available]	Chemotherapy	95	NO	276	[Not Available]	[Not Available]	[Not Available]	[Not Available]	6	[Not Available]	mg/m2	mg	200	1	PO	[Not Available]	[Not Available]	ADJUVANT	[Not Applicable]	12000	[Not Available]
15a6ad18-a81c-4f5b-80ae-ef56ccf722f9	TCGA-DB-5281	TCGA-DB-5281-D14437	dbd42c32-58ee-4ce6-a5fa-26fabdb20c19	40746	Temodar	[Not Available]	Chemotherapy	25	NO	95	[Not Available]	[Not Available]	[Not Available]	[Not Available]	6	[Not Available]	mg/m2	mg	75	1	PO	[Not Available]	[Not Available]	ADJUVANT	[Not Applicable]	6300	[Not Available]
FB6437F9-ADE8-4C33-A0D0-CEACB2BF784D	TCGA-DB-A4XB	TCGA-DB-A4XB-D40508	49B0E615-ABFF-4D27-B8E9-50F9544D9EAA	41326	Temodar	[Not Available]	Chemotherapy	28	NO	57	Stable Disease	[Not Available]	[Not Available]	[Not Available]	[Not Available]	[Not Available]	[Not Available]	[Not Available]	[Not Available]	[Not Available]	[Not Available]	[Not Available]	[Not Available]	[Not Available]	[Not Applicable]	[Not Available]	NO
1BFF1E07-4923-43D5-B2D3-CB46B6568EED	TCGA-DB-A4XD	TCGA-DB-A4XD-D40472	031BBEB5-469C-4856-AB64-13746690D8E2	41326	Temodar	[Not Available]	Chemotherapy	24	NO	291	Complete Response	[Not Available]	[Not Available]	[Not Available]	[Not Available]	[Not Available]	[Not Available]	[Not Available]	[Not Available]	[Not Available]	[Not Available]	[Not Available]	[Not Available]	[Not Available]	[Not Applicable]	[Not Available]	NO
40587B69-0F62-4A2A-88CB-1BD711377F19	TCGA-DB-A4XF	TCGA-DB-A4XF-D40479	C06C881C-FE44-474B-84FC-132007A2C22A	41326	Temodar	[Not Available]	Chemotherapy	34	NO	264	Stable Disease	[Not Available]	[Not Available]	[Not Available]	[Not Available]	[Not Available]	[Not Available]	[Not Available]	[Not Available]	[Not Available]	[Not Available]	[Not Available]	[Not Available]	[Not Available]	[Not Applicable]	[Not Available]	NO
7704E4A8-C7AA-4288-B1ED-68C23ABBE924	TCGA-DB-A4XG	TCGA-DB-A4XG-D40491	4D136088-CEE6-415F-B6C4-EE9883EF46A0	41326	Temodar	[Not Available]	Chemotherapy	1732	NO	2067	Stable Disease	[Not Available]	[Not Available]	[Not Available]	[Not Available]	[Not Available]	[Not Available]	[Not Available]	[Not Available]	[Not Available]	[Not Available]	[Not Available]	[Not Available]	[Not Available]	[Not Applicable]	[Not Available]	NO
0536F465-1650-4411-823C-C660BC7F3ADC	TCGA-DB-A64O	TCGA-DB-A64O-D46423	D1E2E600-66EC-46FA-8AFB-930AD71BBE58	41493	Temodar	[Not Available]	Chemotherapy	461	NO	551	Stable Disease	[Not Available]	[Not Available]	[Not Available]	[Not Available]	[Not Available]	[Not Available]	[Not Available]	[Not Available]	[Not Available]	[Not Available]	[Not Available]	[Not Available]	[Not Available]	[Not Applicable]	[Not Available]	NO
12F02422-585D-4068-BBDE-BC279C6A89AB	TCGA-DB-A64P	TCGA-DB-A64P-D46428	E56A1559-9641-454E-9F14-ED00F645D89E	41493	Temodar	[Not Available]	Chemotherapy	36	NO	430	Stable Disease	[Not Available]	[Not Available]	[Not Available]	[Not Available]	[Not Available]	[Not Available]	[Not Available]	[Not Available]	[Not Available]	[Not Available]	[Not Available]	[Not Available]	[Not Available]	[Not Applicable]	[Not Available]	NO
887DEF39-E212-490D-8849-2BC932FCEFF0	TCGA-DB-A64Q	TCGA-DB-A64Q-D46483	016B428B-6EFC-4316-AE5C-9575AB2885A2	41493	Temodar	[Not Available]	Chemotherapy	57	YES	[Not Available]	[Not Applicable]	[Not Available]	[Not Available]	[Not Available]	[Not Available]	[Not Available]	[Not Available]	[Not Available]	[Not Available]	[Not Available]	[Not Available]	[Not Available]	[Not Available]	[Not Available]	[Not Applicable]	[Not Available]	NO
176D89D7-F8F1-4A72-B45A-31CBE1632A30	TCGA-DB-A64V	TCGA-DB-A64V-D46511	DACF8EBF-D304-4805-901B-8D708EBB040A	41493	Temodar	[Not Available]	Chemotherapy	20	NO	330	Stable Disease	[Not Available]	[Not Available]	[Not Available]	[Not Available]	[Not Available]	[Not Available]	[Not Available]	[Not Available]	[Not Available]	[Not Available]	[Not Available]	[Not Available]	[Not Available]	[Not Applicable]	[Not Available]	NO
DF22BC30-96E2-42DE-9A39-2954DB49841D	TCGA-DB-A64W	TCGA-DB-A64W-D46509	07E285BC-D322-4AB9-8083-F1F3F64A2814	41493	Temodar	[Not Available]	Chemotherapy	34	NO	274	Stable Disease	[Not Available]	[Not Available]	[Not Available]	[Not Available]	[Not Available]	[Not Available]	[Not Available]	[Not Available]	[Not Available]	[Not Available]	[Not Available]	[Not Available]	[Not Available]	[Not Applicable]	[Not Available]	NO
9922DE10-9280-44C0-B86F-6D1CA7E55BF2	TCGA-DB-A64X	TCGA-DB-A64X-D46516	640A29D8-5081-47AA-93FE-06A3B488486E	41493	Temodar	[Not Available]	Chemotherapy	53	NO	265	Stable Disease	[Not Available]	[Not Available]	[Not Available]	[Not Available]	[Not Available]	[Not Available]	[Not Available]	[Not Available]	[Not Available]	[Not Available]	[Not Available]	[Not Available]	[Not Available]	[Not Applicable]	[Not Available]	NO
5F853A88-811D-4EB4-914E-D90862C5D2A2	TCGA-DB-A75K	TCGA-DB-A75K-D56207	9F88DDF4-2335-4239-AD47-2B1C42645364	41669	Temozolomide	[Not Available]	Chemotherapy	28	NO	64	Complete Response	[Not Available]	[Not Available]	[Not Available]	[Not Available]	[Not Available]	[Not Available]	[Not Available]	[Not Available]	[Not Available]	[Not Available]	[Not Available]	[Not Available]	[Not Available]	[Not Applicable]	[Not Available]	NO
BA62B5EB-E169-4B41-B949-E004D66E98A1	TCGA-DB-A75L	TCGA-DB-A75L-D56226	4A9963F5-D17C-456A-8750-B7246AC188A0	41669	Temozolomide	[Not Available]	Chemotherapy	25	YES	[Not Available]	[Not Applicable]	[Not Available]	[Not Available]	[Not Available]	[Not Available]	[Not Available]	[Not Available]	[Not Available]	[Not Available]	[Not Available]	[Not Available]	[Not Available]	[Not Available]	[Not Available]	[Not Applicable]	[Not Available]	NO
0709DBCC-0828-4066-AA01-96F059E5FA97	TCGA-DB-A75M	TCGA-DB-A75M-D56231	18A2D014-E215-4CAC-BA38-A9A84289DF04	41669	CDR0000654697	E3FO5	Chemotherapy	47	YES	[Not Available]	[Not Applicable]	[Not Available]	[Not Available]	[Not Available]	[Not Available]	[Not Available]	[Not Available]	[Not Available]	[Not Available]	[Not Available]	[Not Available]	[Not Available]	[Not Available]	[Not Available]	[Not Applicable]	[Not Available]	YES
2c03e8b9-8856-43a7-853d-5ec51a6e5330	TCGA-DH-5140	TCGA-DH-5140-D6486	ee3a53f2-38a0-413a-bede-f2536de84d7e	40529	Temozolomide	[Not Available]	Chemotherapy	54	NO	98	[Not Available]	[Not Available]	[Not Available]	[Not Available]	1	[Not Available]	mg/m2/day	mg/m2	75	1	PO	[Not Available]	[Not Available]	ADJUVANT	[Not Applicable]	3375	[Not Available]
2c03e8b9-8856-43a7-853d-5ec51a6e5330	TCGA-DH-5140	TCGA-DH-5140-D6489	8e430c37-8406-47f8-a618-2744c8b542a1	40529	AT 101	[Not Available]	Targeted Molecular therapy	385	NO	[Not Available]	[Not Available]	[Not Available]	[Not Available]	[Not Available]	2	[Not Available]	[Not Available]	[Not Available]	[Not Available]	5	PO	[Not Available]	[Not Available]	PROGRESSION	[Not Applicable]	[Not Available]	[Not Available]
2c03e8b9-8856-43a7-853d-5ec51a6e5330	TCGA-DH-5140	TCGA-DH-5140-D6487	2528c43a-9af2-43f6-8c9d-e3e5749fdf41	40529	Temozolomide	[Not Available]	Chemotherapy	136	NO	250	[Not Available]	[Not Available]	[Not Available]	[Not Available]	1	[Not Available]	mg/m2/day	mg/kg	200	2	PO	[Not Available]	[Not Available]	ADJUVANT	[Not Applicable]	1000	[Not Available]
2c03e8b9-8856-43a7-853d-5ec51a6e5330	TCGA-DH-5140	TCGA-DH-5140-D6488	fb9a572a-d724-4ef3-9bc4-857e31e85406	40529	BCNU (carmustine)	[Not Available]	Chemotherapy	[Not Available]	NO	342	[Not Available]	[Not Available]	[Not Available]	[Not Available]	2	[Not Available]	[Not Available]	[Not Available]	[Not Available]	3	IV	[Not Available]	[Not Available]	PROGRESSION	[Not Applicable]	[Not Available]	[Not Available]
2cf49bac-dea1-45ff-9e1d-09f5a2ac5215	TCGA-DH-5141	TCGA-DH-5141-D6519	b304c8a9-f632-4a44-8e84-83cc51ce5600	40529	Temozolomide	[Not Available]	Chemotherapy	[Not Available]	[Not Available]	[Not Available]	[Not Available]	[Not Available]	[Not Available]	[Not Available]	[Not Available]	[Not Available]	[Not Available]	[Not Available]	[Not Available]	2	PO	[Not Available]	[Not Available]	ADJUVANT	[Not Applicable]	[Not Available]	[Not Available]
2cf49bac-dea1-45ff-9e1d-09f5a2ac5215	TCGA-DH-5141	TCGA-DH-5141-D6516	d266f15b-21b0-4d1a-9585-36f36703aead	40529	Temozolomide	[Not Available]	Chemotherapy	890	NO	936	[Not Available]	[Not Available]	[Not Available]	[Not Available]	1	[Not Available]	[Not Available]	[Not Available]	[Not Available]	1	PO	[Not Available]	[Not Available]	ADJUVANT	[Not Applicable]	[Not Available]	[Not Available]
5b744051-7355-4e15-b035-0621e709a5d7	TCGA-DH-5142	TCGA-DH-5142-D6544	91998a7d-11c1-427d-b99b-db9ef95ed478	40532	Temozolomide	[Not Available]	Chemotherapy	89	NO	93	[Not Available]	[Not Available]	[Not Available]	[Not Available]	1	[Not Available]	mg/day	mg	360	2	PO	[Not Available]	[Not Available]	ADJUVANT	[Not Applicable]	1800	[Not Available]
5b744051-7355-4e15-b035-0621e709a5d7	TCGA-DH-5142	TCGA-DH-5142-D6543	b983b0e5-76b1-4c94-90ec-c9f65f430202	40532	Temozolomide	[Not Available]	Chemotherapy	21	NO	52	[Not Available]	[Not Available]	[Not Available]	[Not Available]	1	[Not Available]	mg/m2/day	mg/m2	75	1	PO	[Not Available]	[Not Available]	ADJUVANT	[Not Applicable]	2400	[Not Available]
5b744051-7355-4e15-b035-0621e709a5d7	TCGA-DH-5142	TCGA-DH-5142-D6545	9111add0-24dc-4c01-9713-7daf44bd49a3	40532	Temozolomide	[Not Available]	Chemotherapy	117	NO	400	[Not Available]	[Not Available]	[Not Available]	[Not Available]	11	[Not Available]	mg/day	mg	480	3	PO	[Not Available]	[Not Available]	ADJUVANT	[Not Applicable]	5280	[Not Available]
dcd0856d-423a-40d7-8070-4c0988d61416	TCGA-DH-5143	TCGA-DH-5143-D6557	61b753cb-378d-471f-a6fa-1d534eeaa3d3	40529	Temozolomide	[Not Available]	Chemotherapy	123	YES	[Not Available]	[Not Available]	[Not Available]	[Not Available]	[Not Available]	12	[Not Available]	mg/m2/day	mg/m2	200	3	PO	[Not Available]	[Not Available]	ADJUVANT	[Not Applicable]	[Not Available]	[Not Available]
dcd0856d-423a-40d7-8070-4c0988d61416	TCGA-DH-5143	TCGA-DH-5143-D6555	aea492a1-1963-4067-9bee-cd18fbd03c79	40529	Temozolomide	[Not Available]	Chemotherapy	95	NO	99	[Not Available]	[Not Available]	[Not Available]	[Not Available]	1	[Not Available]	mg/day	mg	300	2	PO	[Not Available]	[Not Available]	ADJUVANT	[Not Applicable]	1500	[Not Available]
dcd0856d-423a-40d7-8070-4c0988d61416	TCGA-DH-5143	TCGA-DH-5143-D6554	e0609dd7-caf7-4d71-8d16-a6c8fc349c69	40529	Temozolomide	[Not Available]	Chemotherapy	25	NO	64	[Not Available]	[Not Available]	[Not Available]	[Not Available]	1	[Not Available]	mg/m2/day	mg/m2	75	1	PO	[Not Available]	[Not Available]	ADJUVANT	[Not Applicable]	3000	[Not Available]
CB1E9916-C03F-405A-A797-15823DF09C8E	TCGA-DH-A66B	TCGA-DH-A66B-D46562	9A60312E-9D6E-4C6A-A773-1DD195DBA56E	41495	Temozolomide	[Not Available]	Chemotherapy	25	NO	432	Stable Disease	[Not Available]	[Not Available]	[Not Available]	[Not Available]	[Not Available]	[Not Available]	[Not Available]	[Not Available]	[Not Available]	[Not Available]	[Not Available]	[Not Available]	[Not Available]	[Not Applicable]	[Not Available]	NO
F005FA99-7E4E-4308-B11C-83B25683B1FD	TCGA-DH-A66D	TCGA-DH-A66D-D46564	DEF7727B-93B0-4931-BF66-027EB013CC90	41495	Temozolomide	[Not Available]	Chemotherapy	31	NO	73	Stable Disease	[Not Available]	[Not Available]	[Not Available]	[Not Available]	[Not Available]	[Not Available]	[Not Available]	[Not Available]	[Not Available]	[Not Available]	[Not Available]	[Not Available]	[Not Available]	[Not Applicable]	[Not Available]	NO
DA40E6D3-A2A9-4517-AAA2-AEF6C3892EBF	TCGA-DH-A66G	TCGA-DH-A66G-D64430	E9553E2D-EAF0-48AD-979F-23ECA9666C61	41884	Temodar	[Not Available]	Chemotherapy	41	NO	211	Partial Response	[Not Available]	[Not Available]	[Not Available]	[Not Available]	[Not Available]	[Not Available]	[Not Available]	[Not Available]	[Not Available]	[Not Available]	[Not Available]	[Not Available]	[Not Available]	[Not Applicable]	[Not Available]	NO
B37ABDC8-B9E3-4F1A-B16D-2E59442DB335	TCGA-DH-A7UR	TCGA-DH-A7UR-D60282	7500051C-55B3-465A-8FFA-30EED95ABD8B	41795	Temodar	[Not Available]	Chemotherapy	33	NO	1076	Complete Response	[Not Available]	[Not Available]	[Not Available]	[Not Available]	[Not Available]	[Not Available]	[Not Available]	[Not Available]	[Not Available]	[Not Available]	[Not Available]	[Not Available]	[Not Available]	[Not Applicable]	[Not Available]	NO
B2B57E93-2722-4546-9A0B-20155B86EDEF	TCGA-DH-A7UT	TCGA-DH-A7UT-D60292	AF34A876-4053-4F16-AFEF-058D051E29BA	41796	Temodar	[Not Available]	Chemotherapy	55	NO	97	Stable Disease	[Not Available]	[Not Available]	[Not Available]	[Not Available]	[Not Available]	[Not Available]	[Not Available]	[Not Available]	[Not Available]	[Not Available]	[Not Available]	[Not Available]	[Not Available]	[Not Applicable]	[Not Available]	NO
977118C8-B446-4696-AA6E-9F1A1055E241	TCGA-DH-A7UU	TCGA-DH-A7UU-D60354	6B976447-B1E6-4CC4-A0A5-D25E373C2671	41796	Temodar	[Not Available]	Chemotherapy	41	NO	88	Stable Disease	[Not Available]	[Not Available]	[Not Available]	[Not Available]	[Not Available]	[Not Available]	[Not Available]	[Not Available]	[Not Available]	[Not Available]	[Not Available]	[Not Available]	[Not Available]	[Not Applicable]	[Not Available]	NO
3B19B5D1-13AF-4669-A082-1BD546048185	TCGA-DH-A7UV	TCGA-DH-A7UV-D60356	23F803F1-9471-463E-B2A5-74C49E3A765A	41796	Temodar	[Not Available]	Chemotherapy	20	NO	463	Stable Disease	[Not Available]	[Not Available]	[Not Available]	[Not Available]	[Not Available]	[Not Available]	[Not Available]	[Not Available]	[Not Available]	[Not Available]	[Not Available]	[Not Available]	[Not Available]	[Not Applicable]	[Not Available]	NO
92a7c445-2217-400a-bdcd-df41502416b6	TCGA-DU-5847	TCGA-DU-5847-D14830	55c779f0-e61a-473c-8a89-935f50562c9a	40715	Bevacizumab	[Not Available]	Targeted Molecular therapy	84	NO	265	[Not Available]	[Not Available]	[Not Available]	[Not Available]	6	[Not Available]	mg	[Not Available]	[Not Available]	1	IV	[Not Available]	[Not Available]	ADJUVANT	[Not Applicable]	[Not Available]	[Not Available]
92a7c445-2217-400a-bdcd-df41502416b6	TCGA-DU-5847	TCGA-DU-5847-D14827	3af6c9cd-f9b6-4671-a6fd-6ebfc1699b25	40715	Temozolomide	[Not Available]	Chemotherapy	84	NO	265	[Not Available]	[Not Available]	[Not Available]	[Not Available]	6	[Not Available]	mg/m2	[Not Available]	[Not Available]	1	PO	[Not Available]	[Not Available]	ADJUVANT	[Not Applicable]	[Not Available]	[Not Available]
92a7c445-2217-400a-bdcd-df41502416b6	TCGA-DU-5847	TCGA-DU-5847-D14829	a3b7d452-71cd-4e89-a6ef-48dd6d15b804	40715	Temozolomide	[Not Available]	Chemotherapy	27	NO	89	[Not Available]	[Not Available]	[Not Available]	[Not Available]	1	[Not Available]	mg/m2	[Not Available]	[Not Available]	1	PO	[Not Available]	[Not Available]	ADJUVANT	[Not Applicable]	[Not Available]	[Not Available]
5af8ada5-86b5-4832-8a8e-e975ecca5515	TCGA-DU-5849	TCGA-DU-5849-D14890	265ff908-1f73-4a94-9166-64c735e61e58	40688	Temozolomide	[Not Available]	Chemotherapy	42	NO	226	[Not Available]	[Not Available]	[Not Available]	[Not Available]	6	[Not Available]	mg/m2	mg	[Not Available]	1	PO	[Not Available]	[Not Available]	ADJUVANT	[Not Applicable]	[Not Available]	[Not Available]
55c78413-d102-4113-930e-6d842862fe75	TCGA-DU-5851	TCGA-DU-5851-D15074	1bff07b5-b100-4dc9-be59-bfeabebe8eaa	40763	Temozolomide	[Not Available]	Chemotherapy	51	NO	599	[Not Available]	[Not Available]	[Not Available]	[Not Available]	6	[Not Available]	mg/m2	mg	150	1	PO	[Not Available]	[Not Available]	ADJUVANT	[Not Applicable]	280	[Not Available]
55c78413-d102-4113-930e-6d842862fe75	TCGA-DU-5851	TCGA-DU-5851-D15073	b08d6a07-2ac8-4949-adf8-26d8bab2f154	40763	Temozolomide	[Not Available]	Chemotherapy	22	NO	66	[Not Available]	[Not Available]	[Not Available]	[Not Available]	1	[Not Available]	mg/m2	mg	75	1	PO	[Not Available]	[Not Available]	ADJUVANT	[Not Applicable]	140	[Not Available]
9ed5af0e-c87f-46ff-81e7-9d3041b4034e	TCGA-DU-5852	TCGA-DU-5852-D17046	37497c94-f7b5-4748-9413-bd374ef59b97	40812	Temozolomide	[Not Available]	Chemotherapy	26	NO	52	[Not Available]	[Not Available]	[Not Available]	[Not Available]	1	[Not Available]	mg/m2	mg	[Not Available]	1	PO	[Not Available]	[Not Available]	PROGRESSION	[Not Applicable]	[Not Available]	[Not Available]
2d42dd0e-be3a-46ae-a635-c6f9c52f9fa2	TCGA-DU-5853	TCGA-DU-5853-D16883	dda7fbcd-163a-4afe-b64b-e6d76c7c3552	40806	Temozolomide	[Not Available]	Chemotherapy	28	NO	65	[Not Available]	[Not Available]	[Not Available]	[Not Available]	1	[Not Available]	mg/m2	mg	75	1	PO	[Not Available]	[Not Available]	ADJUVANT	[Not Applicable]	165	[Not Available]
b95afb1a-a1df-4d85-ad34-191928e28a77	TCGA-DU-5854	TCGA-DU-5854-D14895	3457f389-62db-4528-b1fb-9a1470be12f7	40688	Temozolomide	[Not Available]	Chemotherapy	45	NO	90	[Not Available]	[Not Available]	[Not Available]	[Not Available]	1	[Not Available]	mg/m2	mg	75	1	PO	[Not Available]	[Not Available]	ADJUVANT	[Not Applicable]	200	[Not Available]
b95afb1a-a1df-4d85-ad34-191928e28a77	TCGA-DU-5854	TCGA-DU-5854-D14896	ae61433b-1ffa-476f-9a1e-4c4301ae7c53	40688	Temozolomide	[Not Available]	Chemotherapy	134	NO	193	[Not Available]	[Not Available]	[Not Available]	[Not Available]	3	[Not Available]	mg/m2	mg	150	1	PO	[Not Available]	[Not Available]	ADJUVANT	[Not Applicable]	400	[Not Available]
b95afb1a-a1df-4d85-ad34-191928e28a77	TCGA-DU-5854	TCGA-DU-5854-D14897	3f5bab65-4c76-47ee-9c6e-ba279e02acc9	40716	Bevacizumab	[Not Available]	Targeted Molecular therapy	292	YES	[Not Available]	[Not Available]	[Not Available]	[Not Available]	[Not Available]	[Not Available]	[Not Available]	mg/kg	mg	10	2	IV	[Not Available]	[Not Available]	PROGRESSION	[Not Applicable]	850	[Not Available]
e326c1dd-2ef8-431b-a657-440aa3f35ff3	TCGA-DU-5855	TCGA-DU-5855-D14805	0917cb19-d74a-4fb8-8750-5709eec75033	40688	Temozolomide	[Not Available]	Chemotherapy	41	NO	70	[Not Available]	[Not Available]	[Not Available]	[Not Available]	1	[Not Available]	mg/m2	mg	75	1	PO	[Not Available]	[Not Available]	ADJUVANT	[Not Applicable]	140	[Not Available]
e326c1dd-2ef8-431b-a657-440aa3f35ff3	TCGA-DU-5855	TCGA-DU-5855-D14806	8fda500e-bf37-490b-816b-b3bac86f6197	40688	Temozolomide	[Not Available]	Chemotherapy	118	YES	[Not Available]	[Not Available]	[Not Available]	[Not Available]	[Not Available]	4	[Not Available]	mg/m2	mg	200	1	PO	[Not Available]	[Not Available]	ADJUVANT	[Not Applicable]	270	[Not Available]
eb42625e-fbbb-4bee-bbe9-315b3ca2138a	TCGA-DU-5870	TCGA-DU-5870-D14733	ea48cccb-3567-41ba-868f-0f3ffa507732	40751	Temozolomide	[Not Available]	Chemotherapy	4536	NO	4901	[Not Available]	[Not Available]	[Not Available]	[Not Available]	12	[Not Available]	mg/m2	mg	150	1	PO	[Not Available]	[Not Available]	PROGRESSION	[Not Applicable]	230	[Not Available]
eb42625e-fbbb-4bee-bbe9-315b3ca2138a	TCGA-DU-5870	TCGA-DU-5870-D14723	d81e218d-faf8-4926-9cbb-bc8f97033156	40751	Temozolomide	[Not Available]	Chemotherapy	4500	NO	4543	[Not Available]	[Not Available]	[Not Available]	[Not Available]	1	[Not Available]	mg/m2	mg	75	1	PO	[Not Available]	[Not Available]	PROGRESSION	[Not Applicable]	[Not Available]	[Not Available]
ddfd76dc-15d6-4efc-85ea-31674161ebf3	TCGA-DU-5871	TCGA-DU-5871-D14695	23026c9a-3af3-475a-a74f-4a6ca91d1c66	40715	Temozolomide	[Not Available]	Chemotherapy	14	NO	57	[Not Available]	[Not Available]	[Not Available]	[Not Available]	1	[Not Available]	mg/m2	mg	75	1	PO	[Not Available]	[Not Available]	ADJUVANT	[Not Applicable]	160	[Not Available]
ddfd76dc-15d6-4efc-85ea-31674161ebf3	TCGA-DU-5871	TCGA-DU-5871-D14696	9ea9bdb9-1ae6-4eb4-8b30-74581a481d49	40715	Temozolomide	[Not Available]	Chemotherapy	71	NO	222	[Not Available]	[Not Available]	[Not Available]	[Not Available]	6	[Not Available]	mg/m2	mg	200	1	PO	[Not Available]	[Not Available]	ADJUVANT	[Not Applicable]	450	[Not Available]
48607130-c09a-491d-882f-7d2591d13182	TCGA-DU-5872	TCGA-DU-5872-D14773	2e3322bc-a7d1-49c4-89f3-507124d59aac	40714	Temozolomide	[Not Available]	Chemotherapy	34	NO	73	[Not Available]	[Not Available]	[Not Available]	[Not Available]	1	[Not Available]	mg/m2	mg	75	1	PO	[Not Available]	[Not Available]	ADJUVANT	[Not Applicable]	155	[Not Available]
48607130-c09a-491d-882f-7d2591d13182	TCGA-DU-5872	TCGA-DU-5872-D14776	b3d8b5ea-bd0b-4738-ab53-d7aa88304b35	40714	Temozolomide	[Not Available]	Chemotherapy	540	YES	[Not Available]	[Not Available]	[Not Available]	[Not Available]	[Not Available]	1	[Not Available]	mg/m2	mg	[Not Available]	3	PO	[Not Available]	[Not Available]	PROGRESSION	[Not Applicable]	150	[Not Available]
48607130-c09a-491d-882f-7d2591d13182	TCGA-DU-5872	TCGA-DU-5872-D14774	1772ca68-1a45-4fb5-a6f7-b5708225d9f3	40714	Temozolomide	[Not Available]	Chemotherapy	83	NO	267	[Not Available]	[Not Available]	[Not Available]	[Not Available]	6	[Not Available]	mg/m2	mg	150	1	PO	[Not Available]	[Not Available]	ADJUVANT	[Not Applicable]	310	[Not Available]
48607130-c09a-491d-882f-7d2591d13182	TCGA-DU-5872	TCGA-DU-5872-D14775	212f0ee4-683e-426b-99f3-2ae9beadf05d	40714	Bevacizumab	[Not Available]	Targeted Molecular therapy	328	NO	370	[Not Available]	[Not Available]	[Not Available]	[Not Available]	2	[Not Available]	mg/kg	mg	10	2	IV	[Not Available]	[Not Available]	PROGRESSION	[Not Applicable]	959	[Not Available]
1cc53ade-73c0-492b-a7dc-328269fd0e66	TCGA-DU-5874	TCGA-DU-5874-D14707	93cbb4cb-db7b-465a-a69d-69dbdf14397f	40711	Temozolomide	[Not Available]	Chemotherapy	7	NO	160	[Not Available]	[Not Available]	[Not Available]	[Not Available]	6	[Not Available]	mg/m2	mg/m2	150	1	PO	[Not Available]	[Not Available]	ADJUVANT	[Not Applicable]	300	[Not Available]
fcd9e1c4-bddb-4856-844c-03df48fba499	TCGA-DU-6392	TCGA-DU-6392-D14730	7ad5cb6c-01dc-4d48-bb9c-8745bb0f8a5b	40690	Hydroxyurea	[Not Available]	Chemotherapy	17	NO	78	[Not Available]	[Not Available]	[Not Available]	[Not Available]	1	[Not Available]	[Not Available]	mg	[Not Available]	1	PO	[Not Available]	[Not Available]	ADJUVANT	[Not Applicable]	300	[Not Available]
fcd9e1c4-bddb-4856-844c-03df48fba499	TCGA-DU-6392	TCGA-DU-6392-D14731	6eddaf70-0f2e-433f-b5cd-36b4d14a8b6b	40690	PCV	[Not Available]	Chemotherapy	109	NO	443	[Not Available]	[Not Available]	[Not Available]	[Not Available]	6	[Not Available]	[Not Available]	[Not Available]	[Not Available]	1	PO	[Not Available]	[Not Available]	ADJUVANT	[Not Applicable]	[Not Available]	[Not Available]
1937318f-a1bb-4f48-b8ec-4aadd406e52a	TCGA-DU-6393	TCGA-DU-6393-D14738	9b11fdd3-35d1-4fd6-a51e-567c2ebb9f45	40690	Carmustine BCNU	[Not Available]	Chemotherapy	97	NO	431	[Not Available]	[Not Available]	[Not Available]	[Not Available]	8	[Not Available]	mg/m2	[Not Available]	60	1	IV	[Not Available]	[Not Available]	ADJUVANT	[Not Applicable]	[Not Available]	[Not Available]
42cc9620-98fb-4164-a3b2-28d084ca5a03	TCGA-DU-6394	TCGA-DU-6394-D14777	1d863f0f-4a4c-4b5b-b142-3679d22bd91c	40690	PCV	[Not Available]	Chemotherapy	459	NO	459	[Not Available]	[Not Available]	[Not Available]	[Not Available]	1	[Not Available]	[Not Available]	[Not Available]	[Not Available]	2	PO	[Not Available]	[Not Available]	PROGRESSION	[Not Applicable]	[Not Available]	[Not Available]
42cc9620-98fb-4164-a3b2-28d084ca5a03	TCGA-DU-6394	TCGA-DU-6394-D14766	da2a97a2-bcd0-47dd-bd02-2f76d3e2fd75	40690	PCV	[Not Available]	Chemotherapy	94	NO	278	[Not Available]	[Not Available]	[Not Available]	[Not Available]	6	[Not Available]	[Not Available]	[Not Available]	[Not Available]	1	PO	[Not Available]	[Not Available]	ADJUVANT	[Not Applicable]	[Not Available]	[Not Available]
42cc9620-98fb-4164-a3b2-28d084ca5a03	TCGA-DU-6394	TCGA-DU-6394-D14778	42abc1ed-a79a-4973-843d-f35f70b1343e	40690	Hydroxyurea	[Not Available]	Chemotherapy	[Not Available]	NO	[Not Available]	[Not Available]	[Not Available]	[Not Available]	[Not Available]	1	[Not Available]	mg/day	mg/day	500	1	PO	[Not Available]	[Not Available]	ADJUVANT	[Not Applicable]	500	[Not Available]
6355cade-7b3a-43a8-9f1f-8e7bc45755a8	TCGA-DU-6395	TCGA-DU-6395-D14947	a3b4d4ea-fc08-47a3-80d6-c96e3f4a6cd1	40569	Tamoxifen	[Not Available]	Chemotherapy	1425	NO	[Not Available]	[Not Available]	[Not Available]	[Not Available]	[Not Available]	[Not Available]	[Not Available]	mg	mg	10	3	PO	[Not Available]	[Not Available]	PROGRESSION	[Not Applicable]	20	[Not Available]
6355cade-7b3a-43a8-9f1f-8e7bc45755a8	TCGA-DU-6395	TCGA-DU-6395-D14944	564bb929-f3d9-49eb-b544-286ac7cf8686	40689	PCV	[Not Available]	Chemotherapy	870	NO	1266	[Not Available]	[Not Available]	[Not Available]	[Not Available]	1	[Not Available]	[Not Available]	[Not Available]	[Not Available]	1	IV	[Not Available]	[Not Available]	PROGRESSION	[Not Applicable]	[Not Available]	[Not Available]
6355cade-7b3a-43a8-9f1f-8e7bc45755a8	TCGA-DU-6395	TCGA-DU-6395-D14946	a6ce591e-8346-45ee-abee-715500c534e3	40689	PCV	[Not Available]	Chemotherapy	1266	NO	1386	[Not Available]	[Not Available]	[Not Available]	[Not Available]	4	[Not Available]	[Not Available]	[Not Available]	[Not Available]	2	IV	[Not Available]	[Not Available]	PROGRESSION	[Not Applicable]	[Not Available]	[Not Available]
152eaa99-05f5-4d30-bfb1-494a9a900e49	TCGA-DU-6396	TCGA-DU-6396-D14935	1084ba3c-b0c8-4f60-ab84-83956e33cb8d	40751	Isotretinoin	[Not Available]	Targeted Molecular therapy	1823	NO	1946	[Not Available]	[Not Available]	[Not Available]	[Not Available]	4	[Not Available]	mg	mg	[Not Available]	5	PO	[Not Available]	[Not Available]	PROGRESSION	[Not Applicable]	[Not Available]	[Not Available]
152eaa99-05f5-4d30-bfb1-494a9a900e49	TCGA-DU-6396	TCGA-DU-6396-D14933	4cd94d5c-66be-4c9b-93ff-f46de4f44b15	40751	Irinotecan	[Not Available]	Chemotherapy	915	NO	1062	[Not Available]	[Not Available]	[Not Available]	[Not Available]	4	[Not Available]	mg/m2	[Not Available]	125	4	IV	[Not Available]	[Not Available]	PROGRESSION	[Not Applicable]	[Not Available]	[Not Available]
152eaa99-05f5-4d30-bfb1-494a9a900e49	TCGA-DU-6396	TCGA-DU-6396-D14932	9a014511-a6fa-415d-94b6-e1b66bd06118	40751	9 Aminocamptothecin	[Not Available]	Chemotherapy	240	NO	636	[Not Available]	[Not Available]	[Not Available]	[Not Available]	18	[Not Available]	mg/m2	mg/m2	1611	3	IV	[Not Available]	[Not Available]	PROGRESSION	[Not Applicable]	1611	[Not Available]
152eaa99-05f5-4d30-bfb1-494a9a900e49	TCGA-DU-6396	TCGA-DU-6396-D14936	406e2b57-e5a0-44cc-b65e-881ee8287f0f	40751	Tamoxifen	[Not Available]	Hormone Therapy	2127	NO	2250	[Not Available]	[Not Available]	[Not Available]	[Not Available]	4	[Not Available]	mg	mg	[Not Available]	6	PO	[Not Available]	[Not Available]	PROGRESSION	[Not Applicable]	160	[Not Available]
152eaa99-05f5-4d30-bfb1-494a9a900e49	TCGA-DU-6396	TCGA-DU-6396-D14939	fa3ee205-f1c2-449a-bb8d-c7be90bb81a2	40751	Capecitabine	[Not Available]	Chemotherapy	2250	NO	2250	[Not Available]	[Not Available]	[Not Available]	[Not Available]	1	[Not Available]	mg/day	mg	[Not Available]	7	PO	[Not Available]	[Not Available]	PROGRESSION	[Not Applicable]	3500	[Not Available]
152eaa99-05f5-4d30-bfb1-494a9a900e49	TCGA-DU-6396	TCGA-DU-6396-D14930	cd5425bf-34a2-4a3d-9fe1-dcf4c872d12a	40751	Bromo deoxyuridine	[Not Available]	Other, specify in notes	28	NO	59	[Not Available]	[Not Available]	[Not Available]	[Not Available]	1	Radiosensitizer	[Not Available]	[Not Available]	[Not Available]	1	IV	[Not Available]	[Not Available]	ADJUVANT	[Not Applicable]	[Not Available]	[Not Available]
152eaa99-05f5-4d30-bfb1-494a9a900e49	TCGA-DU-6396	TCGA-DU-6396-D14931	94427195-4e76-4498-8d14-caa0f65bd8f1	40751	PCV	[Not Available]	Chemotherapy	82	NO	89	[Not Available]	[Not Available]	[Not Available]	[Not Available]	1	[Not Available]	[Not Available]	[Not Available]	[Not Available]	2	IV|PO	[Not Available]	[Not Available]	ADJUVANT	[Not Applicable]	[Not Available]	[Not Available]
152eaa99-05f5-4d30-bfb1-494a9a900e49	TCGA-DU-6396	TCGA-DU-6396-D14934	27e77493-3706-4477-8dde-0f13bb5c3d05	40751	Temozolomide	[Not Available]	Chemotherapy	1762	NO	2188	[Not Available]	[Not Available]	[Not Available]	[Not Available]	7	[Not Available]	mg/m2	mg	150	5	PO	[Not Available]	[Not Available]	PROGRESSION	[Not Applicable]	225	[Not Available]
e695b780-17f4-4e71-9120-7c6bcafaa3a7	TCGA-DU-6397	TCGA-DU-6397-D14797	92151a5e-0c57-4433-a49a-a714f5aa1cd7	40689	Temozolomide	[Not Available]	Chemotherapy	884	NO	1219	[Not Available]	[Not Available]	[Not Available]	[Not Available]	12	[Not Available]	mg/m2	mg	150	1	PO	[Not Available]	[Not Available]	PROGRESSION	[Not Applicable]	325	[Not Available]
97cb8701-7d63-4142-b404-006fbb3ecb0b	TCGA-DU-6401	TCGA-DU-6401-D14755	15e13b5e-7bc1-4492-9706-544b77b7d03c	40694	Sorafenib (Bay 43-9006)	[Not Available]	Chemotherapy	2512	NO	2512	[Not Available]	[Not Available]	[Not Available]	[Not Available]	2	[Not Available]	mg	mg	400	2	PO	[Not Available]	[Not Available]	PROGRESSION	[Not Applicable]	400	[Not Available]
97cb8701-7d63-4142-b404-006fbb3ecb0b	TCGA-DU-6401	TCGA-DU-6401-D14757	455a61e4-9acc-4709-9dad-491b3c3bcc80	40694	Procarbazine	[Not Available]	Chemotherapy	2542	NO	2542	[Not Available]	[Not Available]	[Not Available]	[Not Available]	1	[Not Available]	mg/m2	mg	[Not Available]	3	PO	[Not Available]	[Not Available]	PROGRESSION	[Not Applicable]	[Not Available]	[Not Available]
97cb8701-7d63-4142-b404-006fbb3ecb0b	TCGA-DU-6401	TCGA-DU-6401-D14754	d9b9efc4-14cf-4394-a70b-1117bea8d4d8	40694	Temozolomide	[Not Available]	Chemotherapy	1903	NO	2451	[Not Available]	[Not Available]	[Not Available]	[Not Available]	16	[Not Available]	mg/m2	mg	[Not Available]	1	PO	[Not Available]	[Not Available]	PROGRESSION	[Not Applicable]	[Not Available]	[Not Available]
152f028e-ee29-40e0-8e75-5cafffacbd45	TCGA-DU-6402	TCGA-DU-6402-D14716	3ae81b40-a276-4005-9c64-97ceaaedc041	40694	Temozolomide	[Not Available]	Chemotherapy	117	NO	122	[Not Available]	[Not Available]	[Not Available]	[Not Available]	1	[Not Available]	mg/m2	mg	100	1	PO	[Not Available]	[Not Available]	PROGRESSION	[Not Applicable]	200	[Not Available]
8daa29c0-f652-4130-a004-5183bbe30c63	TCGA-DU-6403	TCGA-DU-6403-D14748	24ea3712-f7e6-417c-a7e2-777e6d70e4f7	40694	BCNU (Carmustine)	[Not Available]	Chemotherapy	104	NO	196	[Not Available]	[Not Available]	[Not Available]	[Not Available]	2	[Not Available]	[Not Available]	[Not Available]	[Not Available]	2	IV	[Not Available]	[Not Available]	ADJUVANT	[Not Applicable]	[Not Available]	[Not Available]
8daa29c0-f652-4130-a004-5183bbe30c63	TCGA-DU-6403	TCGA-DU-6403-D14746	988b4562-6b54-445c-a85a-778d1d4a43a1	40694	Hydroxyurea	[Not Available]	Chemotherapy	43	NO	74	[Not Available]	[Not Available]	[Not Available]	[Not Available]	1	[Not Available]	mg	mg	[Not Available]	1	PO	[Not Available]	[Not Available]	ADJUVANT	[Not Applicable]	[Not Available]	[Not Available]
8daa29c0-f652-4130-a004-5183bbe30c63	TCGA-DU-6403	TCGA-DU-6403-D14747	7ac56d66-1bea-479f-bce7-8039d1d1eb5c	40694	Gliadel Wafer	[Not Available]	Chemotherapy	10	NO	10	[Not Available]	[Not Available]	[Not Available]	[Not Available]	1	[Not Available]	{Wafer}	[Not Available]	1	1	INTUM	[Not Available]	[Not Available]	ADJUVANT	[Not Applicable]	[Not Available]	[Not Available]
c0d47e0f-4918-4e06-9db6-201671b1259c	TCGA-DU-6404	TCGA-DU-6404-D14798	2128710b-2bfd-4200-a650-deb72ee4278c	40694	Carboplatin	[Not Available]	Chemotherapy	3227	NO	3884	[Not Available]	[Not Available]	[Not Available]	[Not Available]	10	[Not Available]	AUC	mg	5	8	IV	[Not Available]	[Not Available]	PROGRESSION	[Not Applicable]	870	[Not Available]
c0d47e0f-4918-4e06-9db6-201671b1259c	TCGA-DU-6404	TCGA-DU-6404-D14789	b3ee688e-79eb-4dd1-a3ee-e73f99ebf877	40694	Bevacizumab	[Not Available]	Targeted Molecular therapy	2731	NO	3060	[Not Available]	[Not Available]	[Not Available]	[Not Available]	26	[Not Available]	mg/kg	mg	10	5	IV	[Not Available]	[Not Available]	PROGRESSION	[Not Applicable]	745	[Not Available]
c0d47e0f-4918-4e06-9db6-201671b1259c	TCGA-DU-6404	TCGA-DU-6404-D14786	c45c5914-3f1a-44ef-8d3d-20ef29f2e583	40694	Irinotecan	[Not Available]	Chemotherapy	1762	NO	1967	[Not Available]	[Not Available]	[Not Available]	[Not Available]	6	[Not Available]	mg/m2	mg	325	3	IV	[Not Available]	[Not Available]	PROGRESSION	[Not Applicable]	600	[Not Available]
c0d47e0f-4918-4e06-9db6-201671b1259c	TCGA-DU-6404	TCGA-DU-6404-D14790	83dc3af5-58c5-423c-b1d7-7d9cdaf28df4	40694	Temozolomide	[Not Available]	Chemotherapy	3154	NO	3185	[Not Available]	[Not Available]	[Not Available]	[Not Available]	2	[Not Available]	mg/m2	mg	100	6	PO	[Not Available]	[Not Available]	PROGRESSION	[Not Applicable]	140	[Not Available]
c0d47e0f-4918-4e06-9db6-201671b1259c	TCGA-DU-6404	TCGA-DU-6404-D14791	8f2f4cd2-4301-4be8-bdf3-ae8741ec4bc5	40694	Bevacizumab	[Not Available]	Targeted Molecular therapy	3154	NO	3185	[Not Available]	[Not Available]	[Not Available]	[Not Available]	2	[Not Available]	mg/kg	mg	10	6	IV	[Not Available]	[Not Available]	PROGRESSION	[Not Applicable]	745	[Not Available]
c0d47e0f-4918-4e06-9db6-201671b1259c	TCGA-DU-6404	TCGA-DU-6404-D14787	8290859f-c748-4d89-8312-4d66fb7a347b	40694	Irinotecan	[Not Available]	Chemotherapy	2360	NO	2714	[Not Available]	[Not Available]	[Not Available]	[Not Available]	12	[Not Available]	mg/m2	mg	125	4	IV	[Not Available]	[Not Available]	PROGRESSION	[Not Applicable]	231	[Not Available]
c0d47e0f-4918-4e06-9db6-201671b1259c	TCGA-DU-6404	TCGA-DU-6404-D14784	16a48912-089b-46f1-a756-6ee83dfce1a8	40694	Temozolomide	[Not Available]	Chemotherapy	171	NO	506	[Not Available]	[Not Available]	[Not Available]	[Not Available]	12	[Not Available]	mg/m2	mg	200	1	PO	[Not Available]	[Not Available]	ADJUVANT	[Not Applicable]	385	[Not Available]
c0d47e0f-4918-4e06-9db6-201671b1259c	TCGA-DU-6404	TCGA-DU-6404-D14785	4b18ce80-40f5-4f5e-99c8-9949a8689e9f	40694	Temozolomide	[Not Available]	Chemotherapy	1602	NO	1632	[Not Available]	[Not Available]	[Not Available]	[Not Available]	12	[Not Available]	mg/m2	mg	200	2	PO	[Not Available]	[Not Available]	PROGRESSION	[Not Applicable]	370	[Not Available]
c0d47e0f-4918-4e06-9db6-201671b1259c	TCGA-DU-6404	TCGA-DU-6404-D14799	18e4081d-6f45-4245-899d-7df6394f7000	40694	Bevacizumab	[Not Available]	Targeted Molecular therapy	3227	NO	3581	[Not Available]	[Not Available]	[Not Available]	[Not Available]	14	[Not Available]	mg/kg	mg	15	8	IV	[Not Available]	[Not Available]	PROGRESSION	[Not Applicable]	1172	[Not Available]
c0d47e0f-4918-4e06-9db6-201671b1259c	TCGA-DU-6404	TCGA-DU-6404-D14788	7e05a613-6102-4584-a478-8610ff8936d5	40694	Bevacizumab	[Not Available]	Targeted Molecular therapy	2360	NO	2714	[Not Available]	[Not Available]	[Not Available]	[Not Available]	12	[Not Available]	mg/kg	mg	10	4	IV	[Not Available]	[Not Available]	PROGRESSION	[Not Applicable]	134	[Not Available]
c0d47e0f-4918-4e06-9db6-201671b1259c	TCGA-DU-6404	TCGA-DU-6404-D14804	4784091c-7545-4001-bb2f-b2d9920e698b	40715	Bevacizumab	[Not Available]	Targeted Molecular therapy	4066	NO	4066	[Not Available]	[Not Available]	[Not Available]	[Not Available]	1	[Not Available]	mg/kg	mg	10	10	IV	[Not Available]	[Not Available]	PROGRESSION	[Not Applicable]	635	[Not Available]
9239a22e-80b1-49a2-b0d5-cbab7e415254	TCGA-DU-6405	TCGA-DU-6405-D14687	27ec47b6-4503-4cfb-938a-0d32d623545e	40715	Temozolomide	[Not Available]	Chemotherapy	165	NO	499	[Not Available]	[Not Available]	[Not Available]	[Not Available]	11	[Not Available]	mg/m2	mg	150	1	PO	[Not Available]	[Not Available]	ADJUVANT	[Not Applicable]	300	[Not Available]
9239a22e-80b1-49a2-b0d5-cbab7e415254	TCGA-DU-6405	TCGA-DU-6405-D14686	b07896a6-e8ed-435f-9d49-ba2acf9186f9	40715	Temozolomide	[Not Available]	Chemotherapy	34	NO	77	[Not Available]	[Not Available]	[Not Available]	[Not Available]	1	[Not Available]	mg/m2	mg	75	1	PO	[Not Available]	[Not Available]	ADJUVANT	[Not Applicable]	140	[Not Available]
9239a22e-80b1-49a2-b0d5-cbab7e415254	TCGA-DU-6405	TCGA-DU-6405-D14688	ef4f3748-8fcf-402a-ac1c-21d617d6ca73	40715	PS-341 Bortrezomib	[Not Available]	Chemotherapy	530	NO	561	[Not Available]	[Not Available]	[Not Available]	[Not Available]	1	[Not Available]	mg/m2	mg	1.25	2	IV	[Not Available]	[Not Available]	PROGRESSION	[Not Applicable]	203	[Not Available]
9239a22e-80b1-49a2-b0d5-cbab7e415254	TCGA-DU-6405	TCGA-DU-6405-D14690	d5d78110-5704-4e12-81e1-1d959f123460	40715	Cilengitide	[Not Available]	Chemotherapy	561	NO	561	[Not Available]	[Not Available]	[Not Available]	[Not Available]	1	[Not Available]	mg/m2	mg	600	3	IV	[Not Available]	[Not Available]	PROGRESSION	[Not Applicable]	1086	[Not Available]
c13a429c-99ea-478c-ae95-fa499b9ea9fa	TCGA-DU-6406	TCGA-DU-6406-D14902	2edd84a0-4c13-456b-8485-48de001ab22e	40695	Temozolomide	[Not Available]	Chemotherapy	97	NO	280	[Not Available]	[Not Available]	[Not Available]	[Not Available]	7	[Not Available]	mg/m2	mg/m2	200	1	PO	[Not Available]	[Not Available]	ADJUVANT	[Not Applicable]	[Not Available]	[Not Available]
c13a429c-99ea-478c-ae95-fa499b9ea9fa	TCGA-DU-6406	TCGA-DU-6406-D14901	0bfe64d1-8cc5-44fc-8cda-42dd1458a08f	40695	Temozolomide	[Not Available]	Chemotherapy	38	NO	66	[Not Available]	[Not Available]	[Not Available]	[Not Available]	1	[Not Available]	mg/m2	[Not Available]	75	1	PO	[Not Available]	[Not Available]	ADJUVANT	[Not Applicable]	[Not Available]	[Not Available]
c13a429c-99ea-478c-ae95-fa499b9ea9fa	TCGA-DU-6406	TCGA-DU-6406-D14903	101eea12-9909-41a3-906e-ee2fcc94ba4f	40695	Isotrectinoin (acccutane)	[Not Available]	Other, specify in notes	158	NO	280	[Not Available]	[Not Available]	[Not Available]	[Not Available]	5	retinoid	[Not Available]	[Not Available]	[Not Available]	1	PO	[Not Available]	[Not Available]	ADJUVANT	[Not Applicable]	[Not Available]	[Not Available]
70939245-41e0-4845-a473-5fef719b9828	TCGA-DU-6407	TCGA-DU-6407-D14953	68261acf-ff6e-43d0-988b-57cd040ec0be	40714	Temozolomide	[Not Available]	Chemotherapy	2473	NO	2516	[Not Available]	[Not Available]	[Not Available]	[Not Available]	1	[Not Available]	mg/m2	mg	75	1	PO	[Not Available]	[Not Available]	PROGRESSION	[Not Applicable]	140	[Not Available]
70939245-41e0-4845-a473-5fef719b9828	TCGA-DU-6407	TCGA-DU-6407-D14954	b946be0f-487d-4707-9e9c-c8564ed98487	40714	Temozolomide	[Not Available]	Chemotherapy	2531	NO	2774	[Not Available]	[Not Available]	[Not Available]	[Not Available]	8	[Not Available]	mg/m2	mg	150	2	PO	[Not Available]	[Not Available]	PROGRESSION	[Not Applicable]	280	[Not Available]
70939245-41e0-4845-a473-5fef719b9828	TCGA-DU-6407	TCGA-DU-6407-D14955	51323f8f-090f-40a1-b44e-7cb7117bd90f	40714	Temozolomide	[Not Available]	Chemotherapy	2835	NO	2853	[Not Available]	[Not Available]	[Not Available]	[Not Available]	1	[Not Available]	mg/m2	mg	150	3	PO	[Not Available]	[Not Available]	PROGRESSION	[Not Applicable]	135	[Not Available]
70939245-41e0-4845-a473-5fef719b9828	TCGA-DU-6407	TCGA-DU-6407-D14956	d0c4833a-a750-4848-84b9-24bb8743c492	40714	Afatinib	[Not Available]	Chemotherapy	2836	NO	2853	[Not Available]	[Not Available]	[Not Available]	[Not Available]	1	[Not Available]	mg/day	mg	50	3	PO	[Not Available]	[Not Available]	PROGRESSION	[Not Applicable]	50	[Not Available]
14375753-a69f-41e0-b910-2bb8e84cc43a	TCGA-DU-6408	TCGA-DU-6408-D14914	4e0b69f2-a12d-42b1-8d9e-118a8d889a24	40714	Capecitabine	[Not Available]	Chemotherapy	2608	NO	[Not Available]	[Not Available]	[Not Available]	[Not Available]	[Not Available]	[Not Available]	[Not Available]	mg/m2	mg	[Not Available]	2	PO	[Not Available]	[Not Available]	PROGRESSION	[Not Applicable]	[Not Available]	[Not Available]
14375753-a69f-41e0-b910-2bb8e84cc43a	TCGA-DU-6408	TCGA-DU-6408-D14910	37c7aca8-52b5-4421-9922-52ea6ab89b0a	40714	Temozolomide	[Not Available]	Chemotherapy	1175	NO	1226	[Not Available]	[Not Available]	[Not Available]	[Not Available]	2	[Not Available]	mg/m2	mg	[Not Available]	1	PO	[Not Available]	[Not Available]	ADJUVANT	[Not Applicable]	[Not Available]	[Not Available]
14375753-a69f-41e0-b910-2bb8e84cc43a	TCGA-DU-6408	TCGA-DU-6408-D14913	bf35364e-fbff-4d21-b3fc-dff1ce09cb5d	40714	Celebrex	[Not Available]	Other, specify in notes	2608	NO	[Not Available]	[Not Available]	[Not Available]	[Not Available]	[Not Available]	[Not Available]	[Not Available]	mg	mg	[Not Available]	2	PO	[Not Available]	[Not Available]	PROGRESSION	[Not Applicable]	[Not Available]	[Not Available]
14375753-a69f-41e0-b910-2bb8e84cc43a	TCGA-DU-6408	TCGA-DU-6408-D14911	8ac55ee4-7db3-4a31-817c-de2a0893a41c	40714	Temozolomide	[Not Available]	Chemotherapy	2608	NO	[Not Available]	[Not Available]	[Not Available]	[Not Available]	[Not Available]	[Not Available]	[Not Available]	mg/m2	mg	[Not Available]	2	PO	[Not Available]	[Not Available]	PROGRESSION	[Not Applicable]	[Not Available]	[Not Available]
467a7e6a-8cba-4ef1-8afd-6c8eaccbc3df	TCGA-DU-6410	TCGA-DU-6410-D15161	86f1b69a-ced9-4edf-9c4e-7b34d0dfbb85	40714	Temozolomide	[Not Available]	Chemotherapy	56	YES	[Not Available]	[Not Available]	[Not Available]	[Not Available]	[Not Available]	7	[Not Available]	mg/m2	mg	200	1	PO	[Not Available]	[Not Available]	ADJUVANT	[Not Applicable]	400	[Not Available]
cd69d509-a652-4257-a8d3-767296bbb4ec	TCGA-DU-6542	TCGA-DU-6542-D18405	cf893d09-aefc-4352-abba-97c4bfc43091	40694	Temozolomide	[Not Available]	Chemotherapy	97	YES	[Not Available]	[Not Available]	[Not Available]	[Not Available]	[Not Available]	6	[Not Available]	mg/m2	mg	200	1	PO	[Not Available]	[Not Available]	ADJUVANT	[Not Applicable]	400	[Not Available]
cd69d509-a652-4257-a8d3-767296bbb4ec	TCGA-DU-6542	TCGA-DU-6542-D18403	bd0dc956-293e-4f72-9177-31732a441d96	40694	Temozolomide	[Not Available]	Chemotherapy	56	NO	95	[Not Available]	[Not Available]	[Not Available]	[Not Available]	1	[Not Available]	mg/m2	mg	75	1	PO	[Not Available]	[Not Available]	ADJUVANT	[Not Applicable]	145	[Not Available]
215e117c-4d76-463c-8f8a-fd6a28d23929	TCGA-DU-7006	TCGA-DU-7006-D17929	723ff33b-8869-4952-80a3-3713520d5eae	40841	Lomustine	[Not Available]	Chemotherapy	90	NO	[Not Available]	[Not Available]	[Not Available]	[Not Available]	[Not Available]	1	[Not Available]	mg/day	mg	200	1	PO	[Not Available]	[Not Available]	ADJUVANT	[Not Applicable]	200	[Not Available]
215e117c-4d76-463c-8f8a-fd6a28d23929	TCGA-DU-7006	TCGA-DU-7006-D17931	316e5e4e-c0f9-4edb-bee5-f09f9f0d5766	40841	Vincristine	[Not Available]	Chemotherapy	90	NO	[Not Available]	[Not Available]	[Not Available]	[Not Available]	[Not Available]	1	[Not Available]	mg	mg	2	1	IV	[Not Available]	[Not Available]	ADJUVANT	[Not Applicable]	2	[Not Available]
215e117c-4d76-463c-8f8a-fd6a28d23929	TCGA-DU-7006	TCGA-DU-7006-D17930	5f4d4b63-37b9-491c-ad99-60cdde292713	40841	Procarbazine	[Not Available]	Chemotherapy	90	NO	[Not Available]	[Not Available]	[Not Available]	[Not Available]	[Not Available]	1	[Not Available]	mg/day	mg	100	1	PO	[Not Available]	[Not Available]	ADJUVANT	[Not Applicable]	100	[Not Available]
427c40f6-d1bd-49f2-b303-a975793b937e	TCGA-DU-7008	TCGA-DU-7008-D17224	34aab7aa-a5d6-4189-941a-00b031ba04c7	40814	Lomustin	[Not Available]	Chemotherapy	86	NO	239	[Not Available]	[Not Available]	[Not Available]	[Not Available]	4	[Not Available]	mg/m2	mg	110	1	PO	[Not Available]	[Not Available]	ADJUVANT	[Not Applicable]	[Not Available]	[Not Available]
427c40f6-d1bd-49f2-b303-a975793b937e	TCGA-DU-7008	TCGA-DU-7008-D17225	ca121445-5755-440b-976f-e7d670875074	40814	Vincristine	[Not Available]	Chemotherapy	86	NO	239	[Not Available]	[Not Available]	[Not Available]	[Not Available]	4	[Not Available]	mg/m2	mg	104	1	IV	[Not Available]	[Not Available]	ADJUVANT	[Not Applicable]	[Not Available]	[Not Available]
427c40f6-d1bd-49f2-b303-a975793b937e	TCGA-DU-7008	TCGA-DU-7008-D17223	0e7bb365-16bc-4962-a159-7fa3b7e6b776	40814	Procarbazine	[Not Available]	Chemotherapy	86	NO	239	[Not Available]	[Not Available]	[Not Available]	[Not Available]	4	[Not Available]	mg/m2	mg	60	1	PO	[Not Available]	[Not Available]	ADJUVANT	[Not Applicable]	[Not Available]	[Not Available]
01c4ca12-ac08-41dd-9e4f-bfb0971688a2	TCGA-DU-7009	TCGA-DU-7009-D17081	44d75b94-99ef-4bf1-8457-05af11d6ea97	40814	Temozolomide	[Not Available]	Chemotherapy	3095	NO	3279	[Not Available]	[Not Available]	[Not Available]	[Not Available]	6	[Not Available]	mg/m2	mg	[Not Available]	1	PO	[Not Available]	[Not Available]	PROGRESSION	[Not Applicable]	[Not Available]	[Not Available]
834e560a-a506-456d-baf2-a206ca058153	TCGA-DU-7010	TCGA-DU-7010-D17063	caa0c4b5-9983-49d8-95a8-efe28a285e84	40814	Temozolomide	[Not Available]	Chemotherapy	70	NO	162	[Not Available]	[Not Available]	[Not Available]	[Not Available]	[Not Available]	[Not Available]	mg/m2	mg	[Not Available]	1	PO	[Not Available]	[Not Available]	ADJUVANT	[Not Applicable]	[Not Available]	[Not Available]
834e560a-a506-456d-baf2-a206ca058153	TCGA-DU-7010	TCGA-DU-7010-D17061	fd9d915c-a824-445d-999e-3173cc38d953	40814	Temozolomide	[Not Available]	Chemotherapy	11	NO	70	[Not Available]	[Not Available]	[Not Available]	[Not Available]	1	[Not Available]	mg/m2	mg	[Not Available]	1	PO	[Not Available]	[Not Available]	ADJUVANT	[Not Applicable]	[Not Available]	[Not Available]
d61b5d20-4d6d-4fdc-afe8-4b100b686eda	TCGA-DU-7013	TCGA-DU-7013-D17094	909faac9-a567-4223-b445-653d75e77445	40812	Temozolomide	[Not Available]	Chemotherapy	101	NO	163	[Not Available]	[Not Available]	[Not Available]	[Not Available]	3	[Not Available]	mg/m2	mg	[Not Available]	1	PO	[Not Available]	[Not Available]	ADJUVANT	[Not Applicable]	[Not Available]	[Not Available]
ec82a00f-3909-4781-8ae2-e54cbc1ac7ac	TCGA-DU-7015	TCGA-DU-7015-D18637	6c6ae3a3-1841-4e11-abd9-db485469e117	40855	Bevacizumab	[Not Available]	Targeted Molecular therapy	930	YES	[Not Available]	[Not Available]	[Not Available]	[Not Available]	[Not Available]	[Not Available]	[Not Available]	mg/kg	mg	[Not Available]	2	IV	[Not Available]	[Not Available]	PROGRESSION	[Not Applicable]	[Not Available]	[Not Available]
ec82a00f-3909-4781-8ae2-e54cbc1ac7ac	TCGA-DU-7015	TCGA-DU-7015-D18634	6d0329fe-9b8c-4443-b156-60a52d35590c	40855	Temozolomide	[Not Available]	Chemotherapy	616	NO	884	[Not Available]	[Not Available]	[Not Available]	[Not Available]	6	[Not Available]	mg/m2	mg	200	1	PO	[Not Available]	[Not Available]	ADJUVANT	[Not Applicable]	440	[Not Available]
ec82a00f-3909-4781-8ae2-e54cbc1ac7ac	TCGA-DU-7015	TCGA-DU-7015-D18635	8163fd2e-6bd9-4728-89fb-b7b1aaf8868d	40855	Irinotecan	[Not Available]	Chemotherapy	930	NO	1460	[Not Available]	[Not Available]	[Not Available]	[Not Available]	17	[Not Available]	mg/kg	mg	[Not Available]	2	IV	[Not Available]	[Not Available]	PROGRESSION	[Not Applicable]	[Not Available]	[Not Available]
f18dab99-26b0-4727-89a9-7f16bd382356	TCGA-DU-7018	TCGA-DU-7018-D17072	0ff38e24-e65f-4420-b997-6be8f0cbe1f4	40809	Temozolomide	[Not Available]	Chemotherapy	635	NO	697	[Not Available]	[Not Available]	[Not Available]	[Not Available]	2	[Not Available]	mg/m2	mg	100	2	PO	[Not Available]	[Not Available]	PROGRESSION	[Not Applicable]	150	[Not Available]
f18dab99-26b0-4727-89a9-7f16bd382356	TCGA-DU-7018	TCGA-DU-7018-D17071	de8a8468-26f5-46ad-8a52-b62f67e846ea	40809	Temozolomide	[Not Available]	Chemotherapy	56	NO	605	[Not Available]	[Not Available]	[Not Available]	[Not Available]	17	[Not Available]	mg/m2	mg	150	1	PO	[Not Available]	[Not Available]	ADJUVANT	[Not Applicable]	330	[Not Available]
1b43ff0c-cf13-4620-b5c7-7abd9129612f	TCGA-DU-7019	TCGA-DU-7019-D17099	407c4659-4e06-40bf-ba0f-7f715113b34f	40812	Temozolomide	[Not Available]	Chemotherapy	101	NO	436	[Not Available]	[Not Available]	[Not Available]	[Not Available]	12	[Not Available]	mg/m2	mg	150	1	PO	[Not Available]	[Not Available]	ADJUVANT	[Not Applicable]	320	[Not Available]
1b43ff0c-cf13-4620-b5c7-7abd9129612f	TCGA-DU-7019	TCGA-DU-7019-D17098	768a76e4-31d4-43bc-85d9-e205b2e3b937	40812	Temozolomide	[Not Available]	Chemotherapy	28	NO	71	[Not Available]	[Not Available]	[Not Available]	[Not Available]	1	[Not Available]	mg/m2	mg	75	1	PO	[Not Available]	[Not Available]	ADJUVANT	[Not Applicable]	160	[Not Available]
145f87a3-5e86-4a87-8e49-b166a2271d02	TCGA-DU-7292	TCGA-DU-7292-D17520	849dca85-f3f7-4138-98cf-26f78f38d3d9	40821	Tomaxifen	[Not Available]	Chemotherapy	176	NO	206	[Not Available]	[Not Available]	[Not Available]	[Not Available]	1	[Not Available]	mg/day	mg	20	1	PO	[Not Available]	[Not Available]	PROGRESSION	[Not Applicable]	20	[Not Available]
145f87a3-5e86-4a87-8e49-b166a2271d02	TCGA-DU-7292	TCGA-DU-7292-D17519	d5d225da-320e-4069-b6ac-2bb4744af8ae	40821	Procarbazine	[Not Available]	Chemotherapy	176	NO	206	[Not Available]	[Not Available]	[Not Available]	[Not Available]	1	[Not Available]	mg/day	mg	100	1	PO	[Not Available]	[Not Available]	PROGRESSION	[Not Applicable]	100	[Not Available]
292cf158-dd47-44a1-912b-73626095a0f7	TCGA-DU-7298	TCGA-DU-7298-D17500	0ce65b73-52ed-4e3c-8c63-059390085216	40827	Temozolomide	[Not Available]	Chemotherapy	207	NO	207	[Not Available]	[Not Available]	[Not Available]	[Not Available]	1	[Not Available]	mg/m2	mg	200	1	PO	[Not Available]	[Not Available]	ADJUVANT	[Not Applicable]	350	[Not Available]
292cf158-dd47-44a1-912b-73626095a0f7	TCGA-DU-7298	TCGA-DU-7298-D17499	cd4abb43-8f0d-4aae-ab32-ff00a06e3023	40828	Temozolomide	[Not Available]	Chemotherapy	41	NO	101	[Not Available]	[Not Available]	[Not Available]	[Not Available]	1	[Not Available]	mg/m2	mg	75	1	PO	[Not Available]	[Not Available]	ADJUVANT	[Not Applicable]	140	[Not Available]
81622da8-9f36-4ea3-b223-d831d8c10f87	TCGA-DU-7299	TCGA-DU-7299-D18396	162e312c-756b-489c-a377-99bb5708bd8a	40855	Temozolomide	[Not Available]	Chemotherapy	945	NO	1157	[Not Available]	[Not Available]	[Not Available]	[Not Available]	7	[Not Available]	mg/m2	mg	75	3	PO	[Not Available]	[Not Available]	PROGRESSION	[Not Applicable]	140	[Not Available]
81622da8-9f36-4ea3-b223-d831d8c10f87	TCGA-DU-7299	TCGA-DU-7299-D18395	6c6d5e51-9acf-4db8-9c19-b46d4f36c3c5	40855	Bevacizumab	[Not Available]	Targeted Molecular therapy	721	NO	1016	[Not Available]	[Not Available]	[Not Available]	[Not Available]	6	[Not Available]	mg/kg	mg	10	2	IV	[Not Available]	[Not Available]	PROGRESSION	[Not Applicable]	911	[Not Available]
81622da8-9f36-4ea3-b223-d831d8c10f87	TCGA-DU-7299	TCGA-DU-7299-D18393	a82d62eb-3489-4687-a17a-a46edf04c965	40855	Irinotecan	[Not Available]	Chemotherapy	721	NO	945	[Not Available]	[Not Available]	[Not Available]	[Not Available]	3	[Not Available]	mg/m2	mg	125	2	IV	[Not Available]	[Not Available]	PROGRESSION	[Not Applicable]	256	[Not Available]
81622da8-9f36-4ea3-b223-d831d8c10f87	TCGA-DU-7299	TCGA-DU-7299-D18392	b7f97f91-d3bd-48ce-a985-648ac665dee8	40855	Temozolomide	[Not Available]	Chemotherapy	91	NO	456	[Not Available]	[Not Available]	[Not Available]	[Not Available]	12	[Not Available]	mg/m2	mg	200	1	PO	[Not Available]	[Not Available]	ADJUVANT	[Not Applicable]	420	[Not Available]
81622da8-9f36-4ea3-b223-d831d8c10f87	TCGA-DU-7299	TCGA-DU-7299-D18391	70d4e8a3-8e0d-4bed-9501-38f2a5cbef65	40855	Temozolomide	[Not Available]	Chemotherapy	28	NO	70	[Not Available]	[Not Available]	[Not Available]	[Not Available]	1	[Not Available]	mg/m2	mg	75	1	PO	[Not Available]	[Not Available]	ADJUVANT	[Not Applicable]	160	[Not Available]
a144e4e4-2877-4340-a2bf-524adbde8bc8	TCGA-DU-7300	TCGA-DU-7300-D17528	5431dd7a-6389-4069-92a3-6a0d5c8df2d2	40821	Temozolomide	[Not Available]	Chemotherapy	337	NO	368	[Not Available]	[Not Available]	[Not Available]	[Not Available]	1	[Not Available]	mg/m2	mg	75	2	PO	[Not Available]	[Not Available]	PROGRESSION	[Not Applicable]	[Not Available]	[Not Available]
a144e4e4-2877-4340-a2bf-524adbde8bc8	TCGA-DU-7300	TCGA-DU-7300-D17529	c0738f83-af43-470c-b1f3-55d91ecb6c80	40821	Temozolomide	[Not Available]	Chemotherapy	[Not Available]	NO	764	[Not Available]	[Not Available]	[Not Available]	[Not Available]	[Not Available]	[Not Available]	mg/m2	mg	[Not Available]	2	PO	[Not Available]	[Not Available]	PROGRESSION	[Not Applicable]	[Not Available]	[Not Available]
a144e4e4-2877-4340-a2bf-524adbde8bc8	TCGA-DU-7300	TCGA-DU-7300-D17531	9fd1c5c0-311e-414e-af6d-45d54346b05f	40821	Bevacizumab	[Not Available]	Targeted Molecular therapy	1086	NO	[Not Available]	[Not Available]	[Not Available]	[Not Available]	[Not Available]	[Not Available]	[Not Available]	mg/kg	mg	[Not Available]	3	IV	[Not Available]	[Not Available]	PROGRESSION	[Not Applicable]	[Not Available]	[Not Available]
a144e4e4-2877-4340-a2bf-524adbde8bc8	TCGA-DU-7300	TCGA-DU-7300-D17530	d2d350cd-bef1-4114-ac7b-7ec3ab44b2f1	40821	Irintotecan	[Not Available]	Chemotherapy	1086	NO	[Not Available]	[Not Available]	[Not Available]	[Not Available]	[Not Available]	[Not Available]	[Not Available]	mg/m2	mg	[Not Available]	3	IV	[Not Available]	[Not Available]	PROGRESSION	[Not Applicable]	[Not Available]	[Not Available]
a144e4e4-2877-4340-a2bf-524adbde8bc8	TCGA-DU-7300	TCGA-DU-7300-D17527	444b1400-212c-4f30-b57b-2d0b8e7b0db3	40821	Temozolomide	[Not Available]	Chemotherapy	3	NO	307	[Not Available]	[Not Available]	[Not Available]	[Not Available]	10	[Not Available]	mg/m2	mg	200	1	PO	[Not Available]	[Not Available]	ADJUVANT	[Not Applicable]	280	[Not Available]
84ae73e4-3b39-4444-9bfb-3fc6057eab32	TCGA-DU-7301	TCGA-DU-7301-D17535	da481593-0d3e-4440-bd59-c93ce95df640	40828	Temozolomide	[Not Available]	Chemotherapy	28	NO	66	[Not Available]	[Not Available]	[Not Available]	[Not Available]	1	[Not Available]	mg/m2	mg	75	1	PO	[Not Available]	[Not Available]	ADJUVANT	[Not Applicable]	160	[Not Available]
84ae73e4-3b39-4444-9bfb-3fc6057eab32	TCGA-DU-7301	TCGA-DU-7301-D17536	0339bf1b-2b0f-4bff-9616-99a7c337c6d4	40828	Temozlomide	[Not Available]	Chemotherapy	65	NO	369	[Not Available]	[Not Available]	[Not Available]	[Not Available]	9	[Not Available]	mg/m2	mg	200	1	PO	[Not Available]	[Not Available]	ADJUVANT	[Not Applicable]	450	[Not Available]
84ae73e4-3b39-4444-9bfb-3fc6057eab32	TCGA-DU-7301	TCGA-DU-7301-D17537	416f8414-2219-49f9-90fb-13a43fb6b5a2	40828	Irinotecan	[Not Available]	Chemotherapy	379	NO	534	[Not Available]	[Not Available]	[Not Available]	[Not Available]	4	[Not Available]	mg/m2	mg	125	2	IV	[Not Available]	[Not Available]	PROGRESSION	[Not Applicable]	280	[Not Available]
84ae73e4-3b39-4444-9bfb-3fc6057eab32	TCGA-DU-7301	TCGA-DU-7301-D17539	ba652ae9-a162-43de-88df-d4fa7bade195	40828	Temozolomide	[Not Available]	Chemotherapy	626	NO	643	[Not Available]	[Not Available]	[Not Available]	[Not Available]	1	[Not Available]	mg/m2	mg	75	3	PO	[Not Available]	[Not Available]	PROGRESSION	[Not Applicable]	160	[Not Available]
84ae73e4-3b39-4444-9bfb-3fc6057eab32	TCGA-DU-7301	TCGA-DU-7301-D17538	42dc258d-7ebc-4fb1-8523-b39d28369a1f	40828	Bevacizumab	[Not Available]	Targeted Molecular therapy	379	NO	629	[Not Available]	[Not Available]	[Not Available]	[Not Available]	7	[Not Available]	mg/kg	mg	10	2	IV	[Not Available]	[Not Available]	PROGRESSION	[Not Applicable]	1058	[Not Available]
5a769292-c3ce-4e18-b821-2bfe0e24978c	TCGA-DU-7302	TCGA-DU-7302-D17546	0cb7bafc-7b49-415e-9c8d-cd09c26933bc	40827	Bevacizumab	[Not Available]	Targeted Molecular therapy	1691	YES	[Not Available]	[Not Available]	[Not Available]	[Not Available]	[Not Available]	7	[Not Available]	mg/kg	mg	10	3	IV	[Not Available]	[Not Available]	PROGRESSION	[Not Applicable]	1020	[Not Available]
5a769292-c3ce-4e18-b821-2bfe0e24978c	TCGA-DU-7302	TCGA-DU-7302-D17545	a3fdb0ab-0826-4b2e-bc73-953b1b75392d	40827	Temozolomide	[Not Available]	Chemotherapy	1382	NO	1686	[Not Available]	[Not Available]	[Not Available]	[Not Available]	10	[Not Available]	mg/m2	mg	75	2	PO	[Not Available]	[Not Available]	PROGRESSION	[Not Applicable]	155	[Not Available]
5a769292-c3ce-4e18-b821-2bfe0e24978c	TCGA-DU-7302	TCGA-DU-7302-D17544	086ba121-af92-44a0-b136-f364d2d61ae8	40827	Temozolomide	[Not Available]	Chemotherapy	14	NO	530	[Not Available]	[Not Available]	[Not Available]	[Not Available]	12	[Not Available]	mg/m2	mg	200	1	PO	[Not Available]	[Not Available]	ADJUVANT	[Not Applicable]	390	[Not Available]
d61710c1-8ac3-44e3-b567-66288a6ab731	TCGA-DU-7304	TCGA-DU-7304-D17507	492b5f3f-0776-4b74-85cf-ffa80d16869d	40820	Bevacizumab	[Not Available]	Targeted Molecular therapy	363	NO	623	[Not Available]	[Not Available]	[Not Available]	[Not Available]	10	[Not Available]	mg/kg	mg	10	2	IV	[Not Available]	[Not Available]	PROGRESSION	[Not Applicable]	759	[Not Available]
d61710c1-8ac3-44e3-b567-66288a6ab731	TCGA-DU-7304	TCGA-DU-7304-D17506	7670b1e3-d6e8-4f91-9f36-9fa51f2bd638	40820	Irinotecan	[Not Available]	Chemotherapy	363	NO	539	[Not Available]	[Not Available]	[Not Available]	[Not Available]	7	[Not Available]	mg/m2	mg	125	2	IV	[Not Available]	[Not Available]	PROGRESSION	[Not Applicable]	241	[Not Available]
d61710c1-8ac3-44e3-b567-66288a6ab731	TCGA-DU-7304	TCGA-DU-7304-D17505	9152384e-f80f-405e-ab67-8634ae067452	40820	Temozolomide	[Not Available]	Chemotherapy	97	NO	318	[Not Available]	[Not Available]	[Not Available]	[Not Available]	8	[Not Available]	mg/m2	mg	150	1	PO	[Not Available]	[Not Available]	ADJUVANT	[Not Applicable]	280	[Not Available]
d61710c1-8ac3-44e3-b567-66288a6ab731	TCGA-DU-7304	TCGA-DU-7304-D17504	87477a13-3bb0-4f08-baab-53f814a9501e	40820	Temozolomide	[Not Available]	Chemotherapy	20	NO	69	[Not Available]	[Not Available]	[Not Available]	[Not Available]	1	[Not Available]	mg/m2	mg	75	1	PO	[Not Available]	[Not Available]	ADJUVANT	[Not Applicable]	150	[Not Available]
c35f36b1-ba3d-4eea-bf5a-c95480202176	TCGA-DU-7306	TCGA-DU-7306-D17493	d7b62d39-291a-455c-bfa1-f56e105a9589	40827	temozolomide	[Not Available]	Chemotherapy	14	NO	59	[Not Available]	[Not Available]	[Not Available]	[Not Available]	1	[Not Available]	mg/m2	mg	75	1	PO	[Not Available]	[Not Available]	ADJUVANT	[Not Applicable]	160	[Not Available]
c35f36b1-ba3d-4eea-bf5a-c95480202176	TCGA-DU-7306	TCGA-DU-7306-D17494	f5e5a76a-cc3a-45ee-b051-c45252fa2d95	40827	Temozolomide	[Not Available]	Chemotherapy	97	NO	250	[Not Available]	[Not Available]	[Not Available]	[Not Available]	6	[Not Available]	mg/m2	mg	150	1	PO	[Not Available]	[Not Available]	ADJUVANT	[Not Applicable]	310	[Not Available]
c35f36b1-ba3d-4eea-bf5a-c95480202176	TCGA-DU-7306	TCGA-DU-7306-D17495	c8f0a2bd-3046-41db-bcb7-3774577ca4ae	40828	Temozolomide	[Not Available]	Chemotherapy	1283	YES	[Not Available]	[Not Available]	[Not Available]	[Not Available]	[Not Available]	[Not Available]	[Not Available]	mg/m2	mg	75	2	PO	[Not Available]	[Not Available]	PROGRESSION	[Not Applicable]	165	[Not Available]
ca427acb-034e-42e2-961a-b9d5dc30b741	TCGA-DU-7309	TCGA-DU-7309-D17511	48a26f12-7ec5-410e-827f-8728eae7a1f5	40820	Temozolomide	[Not Available]	Chemotherapy	41	NO	84	[Not Available]	[Not Available]	[Not Available]	[Not Available]	1	[Not Available]	mg/m2	mg	75	1	PO	[Not Available]	[Not Available]	ADJUVANT	[Not Applicable]	140	[Not Available]
b8df1577-2a75-4eb7-ab27-f2dd76160730	TCGA-DU-8158	TCGA-DU-8158-D33125	6009C075-F6A2-495D-929C-4154C2C079EA	41081	Temozolomide	[Not Available]	Chemotherapy	21	NO	66	[Unknown]	[Not Available]	[Not Available]	[Not Available]	[Not Available]	[Not Available]	[Not Available]	[Not Available]	[Not Available]	[Not Available]	[Not Available]	[Not Available]	[Not Available]	[Not Available]	[Not Applicable]	[Not Available]	NO
b9a3b647-61b3-4d98-90ca-e307ab50984a	TCGA-DU-8161	TCGA-DU-8161-D33115	6F53A1F5-D096-44F4-A3D5-58A2EB152E79	41081	Temozolomide	[Not Available]	Chemotherapy	39	NO	78	Stable Disease	[Not Available]	[Not Available]	[Not Available]	[Not Available]	[Not Available]	[Not Available]	[Not Available]	[Not Available]	[Not Available]	[Not Available]	[Not Available]	[Not Available]	[Not Available]	[Not Applicable]	[Not Available]	NO
b9a3b647-61b3-4d98-90ca-e307ab50984a	TCGA-DU-8161	TCGA-DU-8161-D33116	0576A374-F67E-4078-8448-105A7EC56073	41081	Temozolomide	[Not Available]	Chemotherapy	92	NO	92	Clinical Progressive Disease	[Not Available]	[Not Available]	[Not Available]	[Not Available]	[Not Available]	[Not Available]	[Not Available]	[Not Available]	[Not Available]	[Not Available]	[Not Available]	[Not Available]	[Not Available]	[Not Applicable]	[Not Available]	NO
b9a3b647-61b3-4d98-90ca-e307ab50984a	TCGA-DU-8161	TCGA-DU-8161-D33117	0FC1D028-5E10-4C7E-B6FC-88DD0BA67079	41081	Irinotecan	[Not Available]	Chemotherapy	134	NO	575	Stable Disease	[Not Available]	[Not Available]	[Not Available]	[Not Available]	[Not Available]	[Not Available]	[Not Available]	[Not Available]	[Not Available]	[Not Available]	[Not Available]	[Not Available]	[Not Available]	[Not Applicable]	[Not Available]	NO
b9a3b647-61b3-4d98-90ca-e307ab50984a	TCGA-DU-8161	TCGA-DU-8161-D33118	9D020EFF-C8D2-4473-8610-F7D5053A97EE	41081	Bevacizumab	[Not Available]	Targeted Molecular therapy	162	NO	638	Clinical Progressive Disease	[Not Available]	[Not Available]	[Not Available]	[Not Available]	[Not Available]	[Not Available]	[Not Available]	[Not Available]	[Not Available]	[Not Available]	[Not Available]	[Not Available]	[Not Available]	[Not Applicable]	[Not Available]	NO
6fab9c30-354b-4f99-9b60-6823c12b9b0a	TCGA-DU-8162	TCGA-DU-8162-D33121	FE9B8EF7-4418-4446-9780-E2ECF8FDB8A4	41081	Temozolomide	[Not Available]	Chemotherapy	24	NO	70	Stable Disease	[Not Available]	[Not Available]	[Not Available]	[Not Available]	[Not Available]	[Not Available]	[Not Available]	[Not Available]	[Not Available]	[Not Available]	[Not Available]	[Not Available]	[Not Available]	[Not Applicable]	[Not Available]	YES
6fab9c30-354b-4f99-9b60-6823c12b9b0a	TCGA-DU-8162	TCGA-DU-8162-D33122	B2AD4B1D-3B7E-4C0E-A590-A2E7ACB3F597	41081	Temozolomide	[Not Available]	Chemotherapy	108	YES	[Not Available]	[Not Applicable]	[Not Available]	[Not Available]	[Not Available]	[Not Available]	[Not Available]	[Not Available]	[Not Available]	[Not Available]	[Not Available]	[Not Available]	[Not Available]	[Not Available]	[Not Available]	[Not Applicable]	[Not Available]	NO
c81d4681-c02f-4b33-abe0-b6ad7d61194d	TCGA-DU-8163	TCGA-DU-8163-D33105	0C5880BB-0FC8-4729-BBE3-71E46ED49684	41081	Temozolomide	[Not Available]	Chemotherapy	35	NO	81	Stable Disease	[Not Available]	[Not Available]	[Not Available]	[Not Available]	[Not Available]	[Not Available]	[Not Available]	[Not Available]	[Not Available]	[Not Available]	[Not Available]	[Not Available]	[Not Available]	[Not Applicable]	[Not Available]	NO
c81d4681-c02f-4b33-abe0-b6ad7d61194d	TCGA-DU-8163	TCGA-DU-8163-D33106	6EAD861C-E1F5-40A4-AAD1-120B9DA21E15	41081	Temozolomide	[Not Available]	Chemotherapy	87	YES	[Not Available]	[Not Applicable]	[Not Available]	[Not Available]	[Not Available]	[Not Available]	[Not Available]	[Not Available]	[Not Available]	[Not Available]	[Not Available]	[Not Available]	[Not Available]	[Not Available]	[Not Available]	[Not Applicable]	[Not Available]	NO
c81d4681-c02f-4b33-abe0-b6ad7d61194d	TCGA-DU-8163	TCGA-DU-8163-D44372	62C7526F-002E-45DA-BD51-8D092A894B92	41444	Temozolomide	[Not Available]	Chemotherapy	525	YES	[Not Available]	[Not Applicable]	[Not Available]	[Not Available]	[Not Available]	[Not Available]	[Not Available]	[Not Available]	[Not Available]	[Not Available]	[Not Available]	[Not Available]	[Not Available]	[Not Available]	[Not Available]	[Not Applicable]	[Not Available]	NO
f97a9afe-e54a-4ef0-b458-0c77f938552e	TCGA-DU-8164	TCGA-DU-8164-D33147	D44F7932-9A40-4D47-BBBB-AA99E873F87A	41081	Temozolomide	[Not Available]	Chemotherapy	35	YES	[Not Available]	[Not Applicable]	[Not Available]	[Not Available]	[Not Available]	[Not Available]	[Not Available]	[Not Available]	[Not Available]	[Not Available]	[Not Available]	[Not Available]	[Not Available]	[Not Available]	[Not Available]	[Not Applicable]	[Not Available]	NO
11dffe71-b516-41e8-9987-e0ff5d2356d1	TCGA-DU-8165	TCGA-DU-8165-D33110	145B8B1F-FD1F-4CF3-9540-94D864B5D265	41081	Temozolomide	[Not Available]	Chemotherapy	30	NO	71	Stable Disease	[Not Available]	[Not Available]	[Not Available]	[Not Available]	[Not Available]	[Not Available]	[Not Available]	[Not Available]	[Not Available]	[Not Available]	[Not Available]	[Not Available]	[Not Available]	[Not Applicable]	[Not Available]	NO
11dffe71-b516-41e8-9987-e0ff5d2356d1	TCGA-DU-8165	TCGA-DU-8165-D33111	4859BCE3-A8C5-4D00-BA7C-C4F62A10220E	41081	temozolomide	[Not Available]	Chemotherapy	101	YES	[Not Available]	[Not Applicable]	[Not Available]	[Not Available]	[Not Available]	[Not Available]	[Not Available]	[Not Available]	[Not Available]	[Not Available]	[Not Available]	[Not Available]	[Not Available]	[Not Available]	[Not Available]	[Not Applicable]	[Not Available]	NO
e488f613-f155-4e11-87d4-8c789ea81691	TCGA-DU-8166	TCGA-DU-8166-D44354	03D4FB11-E295-4227-B12E-3021FB09BC50	41444	Temozolomide	[Not Available]	Chemotherapy	62	NO	143	Clinical Progressive Disease	[Not Available]	[Not Available]	[Not Available]	[Not Available]	[Not Available]	[Not Available]	[Not Available]	[Not Available]	[Not Available]	[Not Available]	[Not Available]	[Not Available]	[Not Available]	[Not Applicable]	[Not Available]	NO
e488f613-f155-4e11-87d4-8c789ea81691	TCGA-DU-8166	TCGA-DU-8166-D44355	2F9D24F7-6365-4143-90DF-EE052C74E6F0	41444	Lomustine	[Not Available]	Chemotherapy	237	NO	433	Stable Disease	[Not Available]	[Not Available]	[Not Available]	[Not Available]	[Not Available]	[Not Available]	[Not Available]	[Not Available]	[Not Available]	[Not Available]	[Not Available]	[Not Available]	[Not Available]	[Not Applicable]	[Not Available]	NO
e488f613-f155-4e11-87d4-8c789ea81691	TCGA-DU-8166	TCGA-DU-8166-D44356	A971AAD3-1AD3-494D-8945-35B91A1AF170	41444	Procarbazine	[Not Available]	Chemotherapy	237	NO	433	Stable Disease	[Not Available]	[Not Available]	[Not Available]	[Not Available]	[Not Available]	[Not Available]	[Not Available]	[Not Available]	[Not Available]	[Not Available]	[Not Available]	[Not Available]	[Not Available]	[Not Applicable]	[Not Available]	NO
fc8828ae-484d-4fc8-a168-f8bc58ad65b9	TCGA-DU-8168	TCGA-DU-8168-D33151	A4810C43-5747-4139-B975-76501A8399A3	41081	Temozolomide	[Not Available]	Chemotherapy	25	NO	71	Stable Disease	[Not Available]	[Not Available]	[Not Available]	[Not Available]	[Not Available]	[Not Available]	[Not Available]	[Not Available]	[Not Available]	[Not Available]	[Not Available]	[Not Available]	[Not Available]	[Not Applicable]	[Not Available]	NO
fc8828ae-484d-4fc8-a168-f8bc58ad65b9	TCGA-DU-8168	TCGA-DU-8168-D33152	FC39F971-D16D-40D7-84D1-EF3519EF014F	41081	Temozolomide	[Not Available]	Chemotherapy	106	YES	[Not Available]	[Not Applicable]	[Not Available]	[Not Available]	[Not Available]	[Not Available]	[Not Available]	[Not Available]	[Not Available]	[Not Available]	[Not Available]	[Not Available]	[Not Available]	[Not Available]	[Not Available]	[Not Applicable]	[Not Available]	NO
669605F6-39A1-4F8C-81DC-39430FF5F892	TCGA-DU-A5TP	TCGA-DU-A5TP-D44352	8F23D860-77E3-48FD-B210-A6DD1AF2C924	41444	Temozolomide	[Not Available]	Chemotherapy	32	YES	[Not Available]	[Not Applicable]	[Not Available]	[Not Available]	[Not Available]	[Not Available]	[Not Available]	[Not Available]	[Not Available]	[Not Available]	[Not Available]	[Not Available]	[Not Available]	[Not Available]	[Not Available]	[Not Applicable]	[Not Available]	NO
669605F6-39A1-4F8C-81DC-39430FF5F892	TCGA-DU-A5TP	TCGA-DU-A5TP-D71613	812D527E-CB77-43FC-A1BB-DD6C70B06C24	42090	Temozolomide	[Not Available]	Chemotherapy	123	NO	493	Stable Disease	[Not Available]	[Not Available]	[Not Available]	[Not Available]	[Not Available]	[Not Available]	[Not Available]	[Not Available]	[Not Available]	[Not Available]	[Not Available]	[Not Available]	[Not Available]	[Not Applicable]	[Not Available]	NO
4BD8EBC1-6F6E-44A2-8544-106901A7BAE5	TCGA-DU-A5TR	TCGA-DU-A5TR-D44292	62A543A1-22E3-4C0B-817B-2DF6FADDE48B	41443	Temozolomide	[Not Available]	Chemotherapy	25	YES	[Not Available]	[Not Available]	[Not Available]	[Not Available]	[Not Available]	[Not Available]	[Not Available]	[Not Available]	[Not Available]	[Not Available]	[Not Available]	[Not Available]	[Not Available]	[Not Available]	[Not Available]	[Not Applicable]	[Not Available]	NO
DD163547-43AD-4FE4-873E-83C4C6BE4465	TCGA-DU-A5TS	TCGA-DU-A5TS-D48194	1CDA5AF0-27B3-4B75-AB14-AF4DECFDF770	41527	Temodar	[Not Available]	Chemotherapy	25	NO	415	Stable Disease	[Not Available]	[Not Available]	[Not Available]	[Not Available]	[Not Available]	[Not Available]	[Not Available]	[Not Available]	[Not Available]	[Not Available]	[Not Available]	[Not Available]	[Not Available]	[Not Applicable]	[Not Available]	NO
699D3BA1-94C8-409F-90C3-E7FE2F1CF825	TCGA-DU-A5TT	TCGA-DU-A5TT-D44301	5D04902F-3DD4-47DB-9597-CCDBA403750E	41443	Temozolomide	[Not Available]	Chemotherapy	16	YES	[Not Available]	[Not Applicable]	[Not Available]	[Not Available]	[Not Available]	[Not Available]	[Not Available]	[Not Available]	[Not Available]	[Not Available]	[Not Available]	[Not Available]	[Not Available]	[Not Available]	[Not Available]	[Not Applicable]	[Not Available]	NO
1C095C4A-DF97-402E-902C-FC83BCF8EF88	TCGA-DU-A5TU	TCGA-DU-A5TU-D71324	EA6B1A2E-5E6D-4403-8482-A641A0E2C5B2	42087	Temozolomide	[Not Available]	Chemotherapy	627	YES	[Not Available]	Stable Disease	[Not Available]	[Not Available]	[Not Available]	[Not Available]	[Not Available]	[Not Available]	[Not Available]	[Not Available]	[Not Available]	[Not Available]	[Not Available]	[Not Available]	[Not Available]	[Not Applicable]	[Not Available]	NO
0167CF11-74BE-4701-AB9A-4E057D4BB545	TCGA-DU-A5TY	TCGA-DU-A5TY-D43151	D513EE25-1F99-4AB0-B5E6-1DC3F9A89627	41408	Temozolomide	[Not Available]	Chemotherapy	17	NO	64	Stable Disease	[Not Available]	[Not Available]	[Not Available]	[Not Available]	[Not Available]	[Not Available]	[Not Available]	[Not Available]	[Not Available]	[Not Available]	[Not Available]	[Not Available]	[Not Available]	[Not Applicable]	[Not Available]	NO
0167CF11-74BE-4701-AB9A-4E057D4BB545	TCGA-DU-A5TY	TCGA-DU-A5TY-D43152	AEE678D7-9A1F-42D2-AC2A-2A69B93B504A	41408	Temozolomide	[Not Available]	[Not Available]	79	YES	[Not Available]	Stable Disease	[Not Available]	[Not Available]	[Not Available]	[Not Available]	[Not Available]	[Not Available]	[Not Available]	[Not Available]	[Not Available]	[Not Available]	[Not Available]	[Not Available]	[Not Available]	[Not Applicable]	[Not Available]	NO
0167CF11-74BE-4701-AB9A-4E057D4BB545	TCGA-DU-A5TY	TCGA-DU-A5TY-D71311	ACB8A855-B072-4C9B-8DAC-71E04B4E3D8F	42087	Mibefradil	[Not Available]	Chemotherapy	553	NO	812	Clinical Progressive Disease	[Not Available]	[Not Available]	[Not Available]	[Not Available]	[Not Available]	[Not Available]	[Not Available]	[Not Available]	[Not Available]	[Not Available]	[Not Available]	[Not Available]	[Not Available]	[Not Applicable]	[Not Available]	YES
0167CF11-74BE-4701-AB9A-4E057D4BB545	TCGA-DU-A5TY	TCGA-DU-A5TY-D71314	16FD7E66-71DE-46C1-8137-8438D870707D	42087	Temozolomide	[Not Available]	Chemotherapy	553	NO	812	Clinical Progressive Disease	[Not Available]	[Not Available]	[Not Available]	[Not Available]	[Not Available]	[Not Available]	[Not Available]	[Not Available]	[Not Available]	[Not Available]	[Not Available]	[Not Available]	[Not Available]	[Not Applicable]	[Not Available]	YES
0167CF11-74BE-4701-AB9A-4E057D4BB545	TCGA-DU-A5TY	TCGA-DU-A5TY-D71315	A53ACC9C-1221-4CF3-AAAC-458E728EEEF8	42087	Lomustine	[Not Available]	Chemotherapy	814	NO	855	Clinical Progressive Disease	[Not Available]	[Not Available]	[Not Available]	[Not Available]	[Not Available]	[Not Available]	[Not Available]	[Not Available]	[Not Available]	[Not Available]	[Not Available]	[Not Available]	[Not Available]	[Not Applicable]	[Not Available]	NO
0167CF11-74BE-4701-AB9A-4E057D4BB545	TCGA-DU-A5TY	TCGA-DU-A5TY-D71316	20EC2652-DBC9-4B60-91D0-72DF2238C13E	42087	Procarbazine	[Not Available]	Chemotherapy	814	NO	855	Clinical Progressive Disease	[Not Available]	[Not Available]	[Not Available]	[Not Available]	[Not Available]	[Not Available]	[Not Available]	[Not Available]	[Not Available]	[Not Available]	[Not Available]	[Not Available]	[Not Available]	[Not Applicable]	[Not Available]	NO
0167CF11-74BE-4701-AB9A-4E057D4BB545	TCGA-DU-A5TY	TCGA-DU-A5TY-D71318	77E2D94A-C04E-4377-A483-E5F22FF9E830	42087	bevacizumab	[Not Available]	Targeted Molecular therapy	872	NO	914	Clinical Progressive Disease	[Not Available]	[Not Available]	[Not Available]	[Not Available]	[Not Available]	[Not Available]	[Not Available]	[Not Available]	[Not Available]	[Not Available]	[Not Available]	[Not Available]	[Not Available]	[Not Applicable]	[Not Available]	NO
3BAA0015-885C-487A-9076-236F404FEB3E	TCGA-DU-A6S6	TCGA-DU-A6S6-D50317	87C4496C-1A16-4364-910C-E394CEC958FA	41569	Temozolomide	[Not Available]	Chemotherapy	25	NO	272	Stable Disease	[Not Available]	[Not Available]	[Not Available]	[Not Available]	[Not Available]	[Not Available]	[Not Available]	[Not Available]	[Not Available]	[Not Available]	[Not Available]	[Not Available]	[Not Available]	[Not Applicable]	[Not Available]	NO
3BAA0015-885C-487A-9076-236F404FEB3E	TCGA-DU-A6S6	TCGA-DU-A6S6-D50318	2820AAAD-AA7B-470E-944B-24A751CB3616	41569	Temozolomide	[Not Available]	Chemotherapy	2283	YES	[Not Available]	[Not Applicable]	[Not Available]	[Not Available]	[Not Available]	[Not Available]	[Not Available]	[Not Available]	[Not Available]	[Not Available]	[Not Available]	[Not Available]	[Not Available]	[Not Available]	[Not Available]	[Not Applicable]	[Not Available]	NO
3BAA0015-885C-487A-9076-236F404FEB3E	TCGA-DU-A6S6	TCGA-DU-A6S6-D71618	92B51D0D-4FD1-40A7-84ED-BCAB8709BC97	42090	Temozolomide	[Not Available]	Chemotherapy	2281	NO	2492	Stable Disease	[Not Available]	[Not Available]	[Not Available]	[Not Available]	[Not Available]	[Not Available]	[Not Available]	[Not Available]	[Not Available]	[Not Available]	[Not Available]	[Not Available]	[Not Available]	[Not Applicable]	[Not Available]	NO
A56C2083-33D5-4C98-B85F-3B68A3D80ADD	TCGA-DU-A6S7	TCGA-DU-A6S7-D50314	94B12D32-E713-4FE1-A354-7969289F8195	41569	Temozolomide	[Not Available]	Chemotherapy	23	NO	57	Stable Disease	[Not Available]	[Not Available]	[Not Available]	[Not Available]	[Not Available]	[Not Available]	[Not Available]	[Not Available]	[Not Available]	[Not Available]	[Not Available]	[Not Available]	[Not Available]	[Not Applicable]	[Not Available]	NO
A56C2083-33D5-4C98-B85F-3B68A3D80ADD	TCGA-DU-A6S7	TCGA-DU-A6S7-D50315	B5521E8F-701E-4DC4-B35D-A0B7C318DDD2	41569	Temozolomide	[Not Available]	Chemotherapy	129	YES	[Not Available]	[Not Applicable]	[Not Available]	[Not Available]	[Not Available]	[Not Available]	[Not Available]	[Not Available]	[Not Available]	[Not Available]	[Not Available]	[Not Available]	[Not Available]	[Not Available]	[Not Available]	[Not Applicable]	[Not Available]	NO
A56C2083-33D5-4C98-B85F-3B68A3D80ADD	TCGA-DU-A6S7	TCGA-DU-A6S7-D71616	861014FE-D585-429C-8C4B-933CFB115738	42090	Temozolomide	[Not Available]	Chemotherapy	129	NO	464	Stable Disease	[Not Available]	[Not Available]	[Not Available]	[Not Available]	[Not Available]	[Not Available]	[Not Available]	[Not Available]	[Not Available]	[Not Available]	[Not Available]	[Not Available]	[Not Available]	[Not Applicable]	[Not Available]	NO
9CD3B3C6-2268-4E43-964B-B7A4DAF6FC6F	TCGA-DU-A6S8	TCGA-DU-A6S8-D50231	05FB684B-BCF9-4C5F-9CF7-486F9A4EEA1A	41565	Temozolomide	[Not Available]	Chemotherapy	57	YES	[Not Available]	[Not Applicable]	[Not Available]	[Not Available]	[Not Available]	[Not Available]	[Not Available]	[Not Available]	[Not Available]	[Not Available]	[Not Available]	[Not Available]	[Not Available]	[Not Available]	[Not Available]	[Not Applicable]	[Not Available]	NO
30BF5895-0671-4FB1-A96D-857847FCF7B0	TCGA-DU-A76K	TCGA-DU-A76K-D50343	67766C84-4517-44DE-BCA9-0A2EEA468543	41569	Temozolomide	[Not Available]	Chemotherapy	236	NO	269	Clinical Progressive Disease	[Not Available]	[Not Available]	[Not Available]	[Not Available]	[Not Available]	[Not Available]	[Not Available]	[Not Available]	[Not Available]	[Not Available]	[Not Available]	[Not Available]	[Not Available]	[Not Applicable]	[Not Available]	NO
395798C5-3136-4A30-8557-A67A3ABDECAF	TCGA-DU-A76L	TCGA-DU-A76L-D50323	17E31019-21A1-48CA-8472-48CD1CEAD9B5	41569	Temozolomide	[Not Available]	Chemotherapy	16	NO	57	Stable Disease	[Not Available]	[Not Available]	[Not Available]	[Not Available]	[Not Available]	[Not Available]	[Not Available]	[Not Available]	[Not Available]	[Not Available]	[Not Available]	[Not Available]	[Not Available]	[Not Applicable]	[Not Available]	NO
395798C5-3136-4A30-8557-A67A3ABDECAF	TCGA-DU-A76L	TCGA-DU-A76L-D50324	D3A914AA-DC46-4157-98C9-D4F975FFD86B	41569	Temozolomide	[Not Available]	Chemotherapy	54	NO	406	Clinical Progressive Disease	[Not Available]	[Not Available]	[Not Available]	[Not Available]	[Not Available]	[Not Available]	[Not Available]	[Not Available]	[Not Available]	[Not Available]	[Not Available]	[Not Available]	[Not Available]	[Not Applicable]	[Not Available]	NO
395798C5-3136-4A30-8557-A67A3ABDECAF	TCGA-DU-A76L	TCGA-DU-A76L-D50331	225CBF1C-33B0-428A-9718-F9F4236532BA	41569	Procarbazine	[Not Available]	Chemotherapy	588	NO	617	Clinical Progressive Disease	[Not Available]	[Not Available]	[Not Available]	[Not Available]	[Not Available]	[Not Available]	[Not Available]	[Not Available]	[Not Available]	[Not Available]	[Not Available]	[Not Available]	[Not Available]	[Not Applicable]	[Not Available]	YES
395798C5-3136-4A30-8557-A67A3ABDECAF	TCGA-DU-A76L	TCGA-DU-A76L-D50332	6ACA75BD-AD14-4501-9992-FF1E76A48199	41569	Cilengtide	[Not Available]	Targeted Molecular therapy	651	NO	732	Clinical Progressive Disease	[Not Available]	[Not Available]	[Not Available]	[Not Available]	[Not Available]	[Not Available]	[Not Available]	[Not Available]	[Not Available]	[Not Available]	[Not Available]	[Not Available]	[Not Available]	[Not Applicable]	[Not Available]	YES
C56FA247-AD97-4DCE-A2D3-9BDFC5DC7B1B	TCGA-DU-A76O	TCGA-DU-A76O-D50234	1C804B86-2372-4F40-80DC-03362D801B79	41565	Temozolomide	[Not Available]	Chemotherapy	49	NO	94	Stable Disease	[Not Available]	[Not Available]	[Not Available]	[Not Available]	[Not Available]	[Not Available]	[Not Available]	[Not Available]	[Not Available]	[Not Available]	[Not Available]	[Not Available]	[Not Available]	[Not Applicable]	[Not Available]	NO
C56FA247-AD97-4DCE-A2D3-9BDFC5DC7B1B	TCGA-DU-A76O	TCGA-DU-A76O-D50235	4F9A0EDA-E68B-4E0F-AE64-C0A5AD4F12FD	41565	Temozolomide	[Not Available]	Chemotherapy	115	YES	[Not Available]	[Not Applicable]	[Not Available]	[Not Available]	[Not Available]	[Not Available]	[Not Available]	[Not Available]	[Not Available]	[Not Available]	[Not Available]	[Not Available]	[Not Available]	[Not Available]	[Not Available]	[Not Applicable]	[Not Available]	NO
823F571A-3CFD-465D-95FD-187A398CCF6F	TCGA-DU-A76R	TCGA-DU-A76R-D50337	2B58828D-44A4-445E-AB04-8F22AF55BEE5	41569	Temozolomide	[Not Available]	Chemotherapy	389	NO	394	Clinical Progressive Disease	[Not Available]	[Not Available]	[Not Available]	[Not Available]	[Not Available]	[Not Available]	[Not Available]	[Not Available]	[Not Available]	[Not Available]	[Not Available]	[Not Available]	[Not Available]	[Not Applicable]	[Not Available]	NO
04E6E843-7F31-43DA-B111-280CE2BD1949	TCGA-DU-A7T8	TCGA-DU-A7T8-D54838	B31AF3E2-7AC3-4677-A9D2-FF5D4D0C368B	41631	Temozolomide	[Not Available]	Chemotherapy	147	NO	193	Stable Disease	[Not Available]	[Not Available]	[Not Available]	[Not Available]	[Not Available]	[Not Available]	[Not Available]	[Not Available]	[Not Available]	[Not Available]	[Not Available]	[Not Available]	[Not Available]	[Not Applicable]	[Not Available]	NO
04E6E843-7F31-43DA-B111-280CE2BD1949	TCGA-DU-A7T8	TCGA-DU-A7T8-D54839	BB8C1762-3228-4014-88BF-A3056543F75F	41631	Temozolomide	[Not Available]	Chemotherapy	211	NO	407	Stable Disease	[Not Available]	[Not Available]	[Not Available]	[Not Available]	[Not Available]	[Not Available]	[Not Available]	[Not Available]	[Not Available]	[Not Available]	[Not Available]	[Not Available]	[Not Available]	[Not Applicable]	[Not Available]	NO
04E6E843-7F31-43DA-B111-280CE2BD1949	TCGA-DU-A7T8	TCGA-DU-A7T8-D54840	76C09742-BA08-49FB-85A5-CBFA20A15108	41631	Temozolomide	[Not Available]	Chemotherapy	3061	NO	3215	Clinical Progressive Disease	[Not Available]	[Not Available]	[Not Available]	[Not Available]	[Not Available]	[Not Available]	[Not Available]	[Not Available]	[Not Available]	[Not Available]	[Not Available]	[Not Available]	[Not Available]	[Not Applicable]	[Not Available]	NO
04E6E843-7F31-43DA-B111-280CE2BD1949	TCGA-DU-A7T8	TCGA-DU-A7T8-D71630	D69B0F68-C3EC-47F6-B0DC-522C299B0887	42090	Temozolomide	[Not Available]	Chemotherapy	3865	NO	3901	Clinical Progressive Disease	[Not Available]	[Not Available]	[Not Available]	[Not Available]	[Not Available]	[Not Available]	[Not Available]	[Not Available]	[Not Available]	[Not Available]	[Not Available]	[Not Available]	[Not Available]	[Not Applicable]	[Not Available]	NO
04E6E843-7F31-43DA-B111-280CE2BD1949	TCGA-DU-A7T8	TCGA-DU-A7T8-D71631	BE695CC6-4636-4C29-BDB6-A048860C0217	42090	Lomustine (CCNU)	[Not Available]	Chemotherapy	4001	NO	4194	Clinical Progressive Disease	[Not Available]	[Not Available]	[Not Available]	[Not Available]	[Not Available]	[Not Available]	[Not Available]	[Not Available]	[Not Available]	[Not Available]	[Not Available]	[Not Available]	[Not Available]	[Not Applicable]	[Not Available]	NO
04E6E843-7F31-43DA-B111-280CE2BD1949	TCGA-DU-A7T8	TCGA-DU-A7T8-D71632	60D3734B-23AB-40A3-9D2E-8A85A22BC4A0	42090	bevacizumab	[Not Available]	Targeted Molecular therapy	4001	NO	4194	Clinical Progressive Disease	[Not Available]	[Not Available]	[Not Available]	[Not Available]	[Not Available]	[Not Available]	[Not Available]	[Not Available]	[Not Available]	[Not Available]	[Not Available]	[Not Available]	[Not Available]	[Not Applicable]	[Not Available]	NO
EF12BFB7-4147-407F-84E9-586DBB10D583	TCGA-DU-A7TA	TCGA-DU-A7TA-D54834	DE394888-84AB-408B-9F41-E3BEE9D96E4C	41631	Temozolomide	[Not Available]	Chemotherapy	33	NO	70	Stable Disease	[Not Available]	[Not Available]	[Not Available]	[Not Available]	[Not Available]	[Not Available]	[Not Available]	[Not Available]	[Not Available]	[Not Available]	[Not Available]	[Not Available]	[Not Available]	[Not Applicable]	[Not Available]	NO
EF12BFB7-4147-407F-84E9-586DBB10D583	TCGA-DU-A7TA	TCGA-DU-A7TA-D54835	34144EAA-92D6-45E8-A9A8-A1E143BB9761	41631	Temozolomide	[Not Available]	Chemotherapy	77	NO	413	Stable Disease	[Not Available]	[Not Available]	[Not Available]	[Not Available]	[Not Available]	[Not Available]	[Not Available]	[Not Available]	[Not Available]	[Not Available]	[Not Available]	[Not Available]	[Not Available]	[Not Applicable]	[Not Available]	NO
D3D8987D-0A54-45F8-B9C9-17EC89FA864E	TCGA-DU-A7TB	TCGA-DU-A7TB-D56004	2310184D-B65B-4230-891C-E385DB08D9E4	41662	Temozolomide	[Not Available]	Chemotherapy	20	NO	57	Clinical Progressive Disease	[Not Available]	[Not Available]	[Not Available]	[Not Available]	[Not Available]	[Not Available]	[Not Available]	[Not Available]	[Not Available]	[Not Available]	[Not Available]	[Not Available]	[Not Available]	[Not Applicable]	[Not Available]	NO
D3D8987D-0A54-45F8-B9C9-17EC89FA864E	TCGA-DU-A7TB	TCGA-DU-A7TB-D56005	ACA8EACC-BD7E-464E-9A01-A4C2BF5C9041	41662	Temozolomide	[Not Available]	Chemotherapy	88	NO	127	Stable Disease	[Not Available]	[Not Available]	[Not Available]	[Not Available]	[Not Available]	[Not Available]	[Not Available]	[Not Available]	[Not Available]	[Not Available]	[Not Available]	[Not Available]	[Not Available]	[Not Applicable]	[Not Available]	NO
D3D8987D-0A54-45F8-B9C9-17EC89FA864E	TCGA-DU-A7TB	TCGA-DU-A7TB-D56006	A8CF72D5-C8C6-4786-9DE9-9CCD9F0E687F	41662	Temozolomide	[Not Available]	Chemotherapy	153	NO	518	Stable Disease	[Not Available]	[Not Available]	[Not Available]	[Not Available]	[Not Available]	[Not Available]	[Not Available]	[Not Available]	[Not Available]	[Not Available]	[Not Available]	[Not Available]	[Not Available]	[Not Applicable]	[Not Available]	NO
E349D8AA-BB82-4CE8-B14C-61216289F25B	TCGA-DU-A7TD	TCGA-DU-A7TD-D56313	D9622AE8-7E36-415A-A2B5-745803CEF0C4	41673	Temozolomide	[Not Available]	Chemotherapy	22	NO	63	Stable Disease	[Not Available]	[Not Available]	[Not Available]	[Not Available]	[Not Available]	[Not Available]	[Not Available]	[Not Available]	[Not Available]	[Not Available]	[Not Available]	[Not Available]	[Not Available]	[Not Applicable]	[Not Available]	NO
E349D8AA-BB82-4CE8-B14C-61216289F25B	TCGA-DU-A7TD	TCGA-DU-A7TD-D56314	300D4223-5E66-4FF5-9DAF-1B6E6E9A1870	41673	Temozolomide	[Not Available]	Immunotherapy	77	NO	151	Clinical Progressive Disease	[Not Available]	[Not Available]	[Not Available]	[Not Available]	[Not Available]	[Not Available]	[Not Available]	[Not Available]	[Not Available]	[Not Available]	[Not Available]	[Not Available]	[Not Available]	[Not Applicable]	[Not Available]	NO
62EC50E7-636E-46C6-AFED-66BF217B59C1	TCGA-DU-A7TG	TCGA-DU-A7TG-D56330	861B5CB7-3DED-4E28-AED7-0360F4F277F3	41673	Temozolomide	[Not Available]	Chemotherapy	26	NO	128	[Unknown]	[Not Available]	[Not Available]	[Not Available]	[Not Available]	[Not Available]	[Not Available]	[Not Available]	[Not Available]	[Not Available]	[Not Available]	[Not Available]	[Not Available]	[Not Available]	[Not Applicable]	[Not Available]	NO
0EFAF8F9-177C-4FFB-B03F-F0316ADF5DC1	TCGA-DU-A7TI	TCGA-DU-A7TI-D56400	3DBCD02E-18B5-4232-83A3-CBC38B81A66A	41675	SU101	Targeted Molecular Therapy	[Not Available]	232	NO	567	Stable Disease	[Not Available]	[Not Available]	[Not Available]	[Not Available]	[Not Available]	[Not Available]	[Not Available]	[Not Available]	[Not Available]	[Not Available]	[Not Available]	[Not Available]	[Not Available]	[Not Applicable]	[Not Available]	YES
0EFAF8F9-177C-4FFB-B03F-F0316ADF5DC1	TCGA-DU-A7TI	TCGA-DU-A7TI-D56401	FBC93972-332A-4D0B-B1F9-36513FE8138C	41675	ONYX-015	Targeted Molecular Therapy	[Not Available]	840	NO	840	Stable Disease	[Not Available]	[Not Available]	[Not Available]	[Not Available]	[Not Available]	[Not Available]	[Not Available]	[Not Available]	[Not Available]	[Not Available]	[Not Available]	[Not Available]	[Not Available]	[Not Applicable]	[Not Available]	YES
0EFAF8F9-177C-4FFB-B03F-F0316ADF5DC1	TCGA-DU-A7TI	TCGA-DU-A7TI-D56402	0B8FDF31-EB56-4FB1-8911-0881FCD1E914	41675	Temozolomide	[Not Available]	Chemotherapy	932	NO	1085	Clinical Progressive Disease	[Not Available]	[Not Available]	[Not Available]	[Not Available]	[Not Available]	[Not Available]	[Not Available]	[Not Available]	[Not Available]	[Not Available]	[Not Available]	[Not Available]	[Not Available]	[Not Applicable]	[Not Available]	NO
0EFAF8F9-177C-4FFB-B03F-F0316ADF5DC1	TCGA-DU-A7TI	TCGA-DU-A7TI-D56403	8D714D3D-DD1F-44B6-B734-026BF73E8416	41675	cis-retinoic acid	[Not Available]	Chemotherapy	1115	NO	1154	Clinical Progressive Disease	[Not Available]	[Not Available]	[Not Available]	[Not Available]	[Not Available]	[Not Available]	[Not Available]	[Not Available]	[Not Available]	[Not Available]	[Not Available]	[Not Available]	[Not Available]	[Not Applicable]	[Not Available]	NO
0EFAF8F9-177C-4FFB-B03F-F0316ADF5DC1	TCGA-DU-A7TI	TCGA-DU-A7TI-D56404	F92A10E6-179B-4166-8B5F-6D6EA935DA87	41675	Carmustine (BCNU)	[Not Available]	Chemotherapy	1115	NO	1154	Clinical Progressive Disease	[Not Available]	[Not Available]	[Not Available]	[Not Available]	[Not Available]	[Not Available]	[Not Available]	[Not Available]	[Not Available]	[Not Available]	[Not Available]	[Not Available]	[Not Available]	[Not Applicable]	[Not Available]	NO
837b51d0-e6b7-431b-a5f3-7615bdf12b67	TCGA-E1-5302	TCGA-E1-5302-D7574	2dcf157b-be37-47b2-bf3c-7b00b52229a6	40559	Procarbazine	[Not Available]	Chemotherapy	48	NO	154	[Not Available]	[Not Available]	[Not Available]	[Not Available]	2	[Not Available]	mg/m2	mg	75	1	PO	[Not Available]	[Not Available]	ADJUVANT	[Not Applicable]	7840	[Not Available]
837b51d0-e6b7-431b-a5f3-7615bdf12b67	TCGA-E1-5302	TCGA-E1-5302-D7584	c5b80291-66ea-4e01-815c-852f2e3ca534	40559	CPT-11	[Not Available]	Chemotherapy	1322	NO	1434	[Not Available]	[Not Available]	[Not Available]	[Not Available]	3	[Not Available]	mg/m2	mg	340	7	IV	[Not Available]	[Not Available]	PROGRESSION	[Not Applicable]	5670	[Not Available]
837b51d0-e6b7-431b-a5f3-7615bdf12b67	TCGA-E1-5302	TCGA-E1-5302-D7583	cbc81bae-7c74-4d4e-909e-78de7bec5416	40559	Tamoxifen	[Not Available]	Hormone Therapy	1255	NO	1303	[Not Available]	[Not Available]	[Not Available]	[Not Available]	1	[Not Available]	mg	mg	100	6	PO	[Not Available]	[Not Available]	PROGRESSION	[Not Applicable]	8400	[Not Available]
837b51d0-e6b7-431b-a5f3-7615bdf12b67	TCGA-E1-5302	TCGA-E1-5302-D7575	2d204677-5bb2-41ec-bf6e-f4fa7598a8df	40559	Vincristine	[Not Available]	Chemotherapy	48	NO	154	[Not Available]	[Not Available]	[Not Available]	[Not Available]	2	[Not Available]	mg/m2	mg	1.4	1	IV	[Not Available]	[Not Available]	ADJUVANT	[Not Applicable]	8	[Not Available]
837b51d0-e6b7-431b-a5f3-7615bdf12b67	TCGA-E1-5302	TCGA-E1-5302-D7580	61f57525-7536-466e-baa5-6479ad79ba99	40559	Tamoxifen	[Not Available]	Hormone Therapy	294	NO	433	[Not Available]	[Not Available]	[Not Available]	[Not Available]	5	[Not Available]	mg	mg	100	4	PO	[Not Available]	[Not Available]	ADJUVANT	[Not Applicable]	14000	[Not Available]
837b51d0-e6b7-431b-a5f3-7615bdf12b67	TCGA-E1-5302	TCGA-E1-5302-D7582	d51c21de-9ee1-4f03-9204-7c5eaf5f1647	40559	CCNU	[Not Available]	Chemotherapy	1255	NO	1303	[Not Available]	[Not Available]	[Not Available]	[Not Available]	1	[Not Available]	mg/m2	mg	110	6	PO	[Not Available]	[Not Available]	PROGRESSION	[Not Applicable]	200	[Not Available]
837b51d0-e6b7-431b-a5f3-7615bdf12b67	TCGA-E1-5302	TCGA-E1-5302-D7576	45fdba35-ce60-4fd5-a286-d019d4420eca	40559	CCNU	[Not Available]	Chemotherapy	48	NO	154	[Not Available]	[Not Available]	[Not Available]	[Not Available]	2	[Not Available]	mg/m2	mg	130	1	PO	[Not Available]	[Not Available]	ADJUVANT	[Not Applicable]	480	[Not Available]
837b51d0-e6b7-431b-a5f3-7615bdf12b67	TCGA-E1-5302	TCGA-E1-5302-D7581	f8ac81dc-e450-4733-8d88-27b575fb5e04	40559	Temozolomide	[Not Available]	Chemotherapy	433	NO	643	[Not Available]	[Not Available]	[Not Available]	[Not Available]	6	[Not Available]	mg/m2	mg	200	5	PO	[Not Available]	[Not Available]	ADJUVANT	[Not Applicable]	11100	[Not Available]
837b51d0-e6b7-431b-a5f3-7615bdf12b67	TCGA-E1-5302	TCGA-E1-5302-D7577	9a3dd9aa-87ee-4227-af43-6166975ee44b	40559	Procarbazine	[Not Available]	Chemotherapy	202	NO	294	[Not Available]	[Not Available]	[Not Available]	[Not Available]	2	[Not Available]	mg/m2	mg	75	3	PO	[Not Available]	[Not Available]	ADJUVANT	[Not Applicable]	7840	[Not Available]
837b51d0-e6b7-431b-a5f3-7615bdf12b67	TCGA-E1-5302	TCGA-E1-5302-D7579	89e69533-028b-448e-a26c-763557be3b07	40559	CCNU	[Not Available]	Chemotherapy	202	NO	294	[Not Available]	[Not Available]	[Not Available]	[Not Available]	2	[Not Available]	mg/m2	mg	130	3	PO	[Not Available]	[Not Available]	ADJUVANT	[Not Applicable]	480	[Not Available]
837b51d0-e6b7-431b-a5f3-7615bdf12b67	TCGA-E1-5302	TCGA-E1-5302-D7585	675eb0bf-0fe1-4378-8402-07804245657e	40559	Celebrex	[Not Available]	Other, specify in notes	1322	NO	1434	[Not Available]	[Not Available]	[Not Available]	[Not Available]	3	NSAID	mg	mg	400	7	PO	[Not Available]	[Not Available]	PROGRESSION	[Not Applicable]	100800	[Not Available]
837b51d0-e6b7-431b-a5f3-7615bdf12b67	TCGA-E1-5302	TCGA-E1-5302-D7586	ffda16d4-ddf9-4f0a-aa66-7096203b6965	40559	Temozolomide	[Not Available]	Chemotherapy	1434	NO	1493	[Not Available]	[Not Available]	[Not Available]	[Not Available]	2	[Not Available]	mg/m2	mg	200	8	PO	[Not Available]	[Not Available]	PROGRESSION	[Not Applicable]	3700	[Not Available]
837b51d0-e6b7-431b-a5f3-7615bdf12b67	TCGA-E1-5302	TCGA-E1-5302-D7578	cd15de85-acfa-4ddb-b91d-ce601ea1fec3	40559	Vincristine	[Not Available]	Chemotherapy	202	NO	294	[Not Available]	[Not Available]	[Not Available]	[Not Available]	2	[Not Available]	mg/m2	mg	1.4	3	IV	[Not Available]	[Not Available]	ADJUVANT	[Not Applicable]	8	[Not Available]
44a5c3b4-62a7-407b-b492-7069e1a43a26	TCGA-E1-5303	TCGA-E1-5303-D7457	899ae1b9-557b-4dd0-a562-d761ba723890	40562	Tamoxifen	[Not Available]	Hormone Therapy	202	NO	215	[Not Available]	[Not Available]	[Not Available]	[Not Available]	1	[Not Available]	mg	mg	40	3	PO	[Not Available]	[Not Available]	PROGRESSION	[Not Applicable]	1120	[Not Available]
44a5c3b4-62a7-407b-b492-7069e1a43a26	TCGA-E1-5303	TCGA-E1-5303-D7459	7031c972-5b2d-490d-a80e-b578837a941f	40562	Temozolomide	[Not Available]	Chemotherapy	218	NO	582	[Not Available]	[Not Available]	[Not Available]	[Not Available]	12	[Not Available]	mg/m2	mg	150	1	PO	[Not Available]	[Not Available]	PROGRESSION	[Not Applicable]	19375	[Not Available]
44a5c3b4-62a7-407b-b492-7069e1a43a26	TCGA-E1-5303	TCGA-E1-5303-D7456	834cdac1-d3ad-4199-a1dd-4bba5c989fd1	40562	CCNU	[Not Available]	Chemotherapy	156	NO	190	[Not Available]	[Not Available]	[Not Available]	[Not Available]	1	[Not Available]	mg/m2	mg	110	2	PO	[Not Available]	[Not Available]	PROGRESSION	[Not Applicable]	200	[Not Available]
691d5202-90cc-4e08-83a3-0620a89d3a4b	TCGA-E1-5304	TCGA-E1-5304-D7549	be795a9f-dcdf-4a7d-aa4f-94b92b08bd4b	40563	Temozolomide	[Not Available]	Chemotherapy	95	NO	125	[Not Available]	[Not Available]	[Not Available]	[Not Available]	1	[Not Available]	mg/m2	mg	150	3	PO	[Not Available]	[Not Available]	ADJUVANT	[Not Applicable]	1500	[Not Available]
691d5202-90cc-4e08-83a3-0620a89d3a4b	TCGA-E1-5304	TCGA-E1-5304-D7554	95c00cf2-46a2-4357-9580-f19c65b86363	40563	Temozolomide	[Not Available]	Chemotherapy	249	NO	312	[Not Available]	[Not Available]	[Not Available]	[Not Available]	2	[Not Available]	mg/m2	mg	200	6	PO	[Not Available]	[Not Available]	ADJUVANT	[Not Applicable]	3950	[Not Available]
691d5202-90cc-4e08-83a3-0620a89d3a4b	TCGA-E1-5304	TCGA-E1-5304-D7556	4266f715-faf8-4d2a-b45d-e1437dfe2d72	40563	CCNU	[Not Available]	Chemotherapy	312	NO	398	[Not Available]	[Not Available]	[Not Available]	[Not Available]	2	[Not Available]	mg/m2	mg	110	7	PO	[Not Available]	[Not Available]	ADJUVANT	[Not Applicable]	440	[Not Available]
691d5202-90cc-4e08-83a3-0620a89d3a4b	TCGA-E1-5304	TCGA-E1-5304-D7560	6d9b29fb-5777-4b46-aaaf-703389881871	40563	Temozolomide	[Not Available]	Chemotherapy	995	NO	1113	[Not Available]	[Not Available]	[Not Available]	[Not Available]	4	[Not Available]	mg/m2	mg	200	8	PO	[Not Available]	[Not Available]	PROGRESSION	[Not Applicable]	7700	[Not Available]
691d5202-90cc-4e08-83a3-0620a89d3a4b	TCGA-E1-5304	TCGA-E1-5304-D7563	21d4ba99-933d-45ca-b175-dde2cbeb3208	40563	CPT-11	[Not Available]	Chemotherapy	1128	NO	1166	[Not Available]	[Not Available]	[Not Available]	[Not Available]	1	[Not Available]	mg/m2	mg	125	9	IV	[Not Available]	[Not Available]	PROGRESSION	[Not Applicable]	723	[Not Available]
691d5202-90cc-4e08-83a3-0620a89d3a4b	TCGA-E1-5304	TCGA-E1-5304-D7553	b6b37b85-64d1-4954-bc27-52ef5a91f85f	40563	CCNU	[Not Available]	Chemotherapy	160	NO	249	[Not Available]	[Not Available]	[Not Available]	[Not Available]	2	[Not Available]	mg/m2	mg	110	5	PO	[Not Available]	[Not Available]	ADJUVANT	[Not Applicable]	420	[Not Available]
691d5202-90cc-4e08-83a3-0620a89d3a4b	TCGA-E1-5304	TCGA-E1-5304-D7566	6b8d7114-8189-4922-a268-49d24d41d79e	40563	VP-16	[Not Available]	Chemotherapy	1167	NO	1198	[Not Available]	[Not Available]	[Not Available]	[Not Available]	1	[Not Available]	mg/m2	mg	50	10	PO	[Not Available]	[Not Available]	PROGRESSION	[Not Applicable]	2100	[Not Available]
691d5202-90cc-4e08-83a3-0620a89d3a4b	TCGA-E1-5304	TCGA-E1-5304-D7551	a306ab5e-3ea9-444f-b6e0-4bbff0380335	40563	Temozolomide	[Not Available]	Chemotherapy	125	NO	160	[Not Available]	[Not Available]	[Not Available]	[Not Available]	1	[Not Available]	mg/m2	mg	200	4	PO	[Not Available]	[Not Available]	ADJUVANT	[Not Applicable]	2000	[Not Available]
a0bc5147-d9b4-41fd-8df3-a241d23722e8	TCGA-E1-5305	TCGA-E1-5305-D16186	cc8b2398-6351-496d-bfa5-956192b8589e	40763	CCNU	[Not Available]	Chemotherapy	2280	NO	2331	[Not Available]	[Not Available]	[Not Available]	[Not Available]	1	[Not Available]	mg/m2	mg	110	1	PO	[Not Available]	[Not Available]	[Discrepancy]	[Not Applicable]	220	[Not Available]
a0bc5147-d9b4-41fd-8df3-a241d23722e8	TCGA-E1-5305	TCGA-E1-5305-D16187	5d578bf2-fe1e-4e7f-8523-d97643d02d5f	40764	VP-16	[Not Available]	Chemotherapy	148	NO	593	[Not Available]	[Not Available]	[Not Available]	[Not Available]	12	[Not Available]	mg/m2	mg	50	2	PO	[Not Available]	[Not Available]	PROGRESSION	[Not Applicable]	25200	[Not Available]
a0bc5147-d9b4-41fd-8df3-a241d23722e8	TCGA-E1-5305	TCGA-E1-5305-D16192	5b398d6b-46a5-4af0-bb70-090461da40f1	40764	Topotecan	[Not Available]	Chemotherapy	1861	NO	1994	[Not Available]	[Not Available]	[Not Available]	[Not Available]	6	[Not Available]	mg/m2	mg	200	4	PO	[Not Available]	[Not Available]	PROGRESSION	[Not Applicable]	14400	[Not Available]
a0bc5147-d9b4-41fd-8df3-a241d23722e8	TCGA-E1-5305	TCGA-E1-5305-D16188	9f0d6b1f-f74b-4767-9651-07f383616e6a	40764	Temozolomide	[Not Available]	Chemotherapy	148	NO	593	[Not Available]	[Not Available]	[Not Available]	[Not Available]	12	[Not Available]	mg/m2	mg	150	2	PO	[Not Available]	[Not Available]	PROGRESSION	[Not Applicable]	18600	[Not Available]
a0bc5147-d9b4-41fd-8df3-a241d23722e8	TCGA-E1-5305	TCGA-E1-5305-D16189	3c3689e6-abc3-4764-919c-996ab92275b6	40764	Hydroyurea	[Not Available]	Chemotherapy	1636	NO	1825	[Not Available]	[Not Available]	[Not Available]	[Not Available]	6	[Not Available]	mg	mg	500	3	PO	[Not Available]	[Not Available]	PROGRESSION	[Not Applicable]	84000	[Not Available]
a0bc5147-d9b4-41fd-8df3-a241d23722e8	TCGA-E1-5305	TCGA-E1-5305-D16191	fc80d459-8d13-46dd-bf95-7a1e5482fcb6	40764	Temozolomide	[Not Available]	Chemotherapy	1861	NO	1994	[Not Available]	[Not Available]	[Not Available]	[Not Available]	6	[Not Available]	mg/m2	mg	200	4	PO	[Not Available]	[Not Available]	PROGRESSION	[Not Applicable]	12000	[Not Available]
a0bc5147-d9b4-41fd-8df3-a241d23722e8	TCGA-E1-5305	TCGA-E1-5305-D16190	829f988e-fba1-419d-812d-1e060a1124fd	40764	Gleevec	[Not Available]	Targeted Molecular therapy	1636	NO	1825	[Not Available]	[Not Available]	[Not Available]	[Not Available]	6	[Not Available]	mg	mg	500	3	PO	[Not Available]	[Not Available]	PROGRESSION	[Not Applicable]	84000	[Not Available]
a0bc5147-d9b4-41fd-8df3-a241d23722e8	TCGA-E1-5305	TCGA-E1-5305-D16193	b6d30749-dc7c-4990-8996-85babd3a83e0	40764	CPT-11	[Not Available]	Chemotherapy	1994	NO	2093	[Not Available]	[Not Available]	[Not Available]	[Not Available]	2	[Not Available]	mg/m2	mg	340	5	IV	[Not Available]	[Not Available]	PROGRESSION	[Not Applicable]	5440	[Not Available]
a0bc5147-d9b4-41fd-8df3-a241d23722e8	TCGA-E1-5305	TCGA-E1-5305-D16194	08d7b369-80c0-4476-bd5c-0183cf96984c	40765	Cytoxan	[Not Available]	Chemotherapy	2128	NO	2241	[Not Available]	[Not Available]	[Not Available]	[Not Available]	4	[Not Available]	mg	mg	730	6	PO	[Not Available]	[Not Available]	PROGRESSION	[Not Applicable]	81760	[Not Available]
a0bc5147-d9b4-41fd-8df3-a241d23722e8	TCGA-E1-5305	TCGA-E1-5305-D16195	21b355a2-4ea3-473b-b4ad-f238bd434a78	40766	Avastin	[Not Available]	Targeted Molecular therapy	2128	NO	2241	[Not Available]	[Not Available]	[Not Available]	[Not Available]	4	[Not Available]	mg/kg	mg	10	6	IV	[Not Available]	[Not Available]	PROGRESSION	[Not Applicable]	10192	[Not Available]
a6ee311c-0a7b-4f47-86f1-f2164b128f9c	TCGA-E1-5307	TCGA-E1-5307-D16200	44bf42b3-c194-4c93-9a88-42447409a82f	40767	Temodar	[Not Available]	Chemotherapy	229	NO	260	[Not Available]	[Not Available]	[Not Available]	[Not Available]	1	[Not Available]	mg/m2	mg	150	2	PO	[Not Available]	[Not Available]	ADJUVANT	[Not Applicable]	1250	[Not Available]
a6ee311c-0a7b-4f47-86f1-f2164b128f9c	TCGA-E1-5307	TCGA-E1-5307-D16206	f9c645bb-d341-4d79-9d1a-b1bb3018a1d4	40767	Temodar	[Not Available]	Chemotherapy	1462	NO	1599	[Not Available]	[Not Available]	[Not Available]	[Not Available]	4	[Not Available]	mg/m2	mg	150	8	PO	[Not Available]	[Not Available]	PROGRESSION	[Not Applicable]	4800	[Not Available]
a6ee311c-0a7b-4f47-86f1-f2164b128f9c	TCGA-E1-5307	TCGA-E1-5307-D16204	8ae3fefe-fa9b-4330-a82b-b331c3757014	40767	Temodar	[Not Available]	Chemotherapy	466	NO	560	[Not Available]	[Not Available]	[Not Available]	[Not Available]	3	[Not Available]	mg/m2	mg	150	6	PO	[Not Available]	[Not Available]	ADJUVANT	[Not Applicable]	3750	[Not Available]
a6ee311c-0a7b-4f47-86f1-f2164b128f9c	TCGA-E1-5307	TCGA-E1-5307-D16203	a05e8ef2-3ab3-4592-9849-4c7a8d2225da	40767	CCNU	[Not Available]	Chemotherapy	382	NO	466	[Not Available]	[Not Available]	[Not Available]	[Not Available]	1	[Not Available]	mg/m2	mg	82.5	5	PO	[Not Available]	[Not Available]	ADJUVANT	[Not Applicable]	130	[Not Available]
a6ee311c-0a7b-4f47-86f1-f2164b128f9c	TCGA-E1-5307	TCGA-E1-5307-D16199	f796702a-6646-41d0-8bf5-02c53810a781	40767	CCNu	[Not Available]	Chemotherapy	126	NO	215	[Not Available]	[Not Available]	[Not Available]	[Not Available]	2	[Not Available]	mg/m2	mg	110	1	PO	[Not Available]	[Not Available]	ADJUVANT	[Not Applicable]	300	[Not Available]
a6ee311c-0a7b-4f47-86f1-f2164b128f9c	TCGA-E1-5307	TCGA-E1-5307-D16202	9a84e651-ef5f-4428-9a41-9abe3f200b09	40767	CCNU	[Not Available]	Chemotherapy	313	NO	351	[Not Available]	[Not Available]	[Not Available]	[Not Available]	1	[Not Available]	mg/m2	mg	110	4	PO	[Not Available]	[Not Available]	ADJUVANT	[Not Applicable]	180	[Not Available]
a6ee311c-0a7b-4f47-86f1-f2164b128f9c	TCGA-E1-5307	TCGA-E1-5307-D16201	c8dca0fe-e3b8-4666-9e57-0bf36edf5219	40767	Temodar	[Not Available]	Chemotherapy	260	NO	285	[Not Available]	[Not Available]	[Not Available]	[Not Available]	1	[Not Available]	mg/m2	mg	200	3	PO	[Not Available]	[Not Available]	ADJUVANT	[Not Applicable]	1675	[Not Available]
a6ee311c-0a7b-4f47-86f1-f2164b128f9c	TCGA-E1-5307	TCGA-E1-5307-D16207	66c28e64-827c-4f8c-9f50-10830898b436	40767	Temodar	[Not Available]	Chemotherapy	1599	NO	1720	[Not Available]	[Not Available]	[Not Available]	[Not Available]	4	[Not Available]	mg/m2	mg	175	9	PO	[Not Available]	[Not Available]	PROGRESSION	[Not Applicable]	6000	[Not Available]
a6ee311c-0a7b-4f47-86f1-f2164b128f9c	TCGA-E1-5307	TCGA-E1-5307-D16205	d7f710d5-d665-4d0c-9092-28c16ca3cd47	40767	Celebrex	[Not Available]	Other, specify in notes	560	NO	1453	[Not Available]	[Not Available]	[Not Available]	[Not Available]	41	Antiongiogenic	mg	mg	400	7	PO	[Not Available]	[Not Available]	ADJUVANT	[Not Applicable]	45920	[Not Available]
0061e9ef-df6a-414e-af64-c88f8192e2d3	TCGA-E1-5311	TCGA-E1-5311-D7605	30aab203-831a-45a5-a8bb-a12345ebb0fb	40568	Temozolomide	[Not Available]	Chemotherapy	2615	NO	2799	[Not Available]	[Not Available]	[Not Available]	[Not Available]	6	[Not Available]	mg/m2	mg	200	2	PO	[Not Available]	[Not Available]	PROGRESSION	[Not Applicable]	13200	[Not Available]
0061e9ef-df6a-414e-af64-c88f8192e2d3	TCGA-E1-5311	TCGA-E1-5311-D7611	23ccb473-f54d-4bbd-a42f-5a08ba5eb8e3	40568	Celebrex	[Not Available]	Other, specify in notes	3282	NO	3868	[Not Available]	[Not Available]	[Not Available]	[Not Available]	19	NSAID	mg	mg	400	6	PO	[Not Available]	[Not Available]	PROGRESSION	[Not Applicable]	425600	[Not Available]
0061e9ef-df6a-414e-af64-c88f8192e2d3	TCGA-E1-5311	TCGA-E1-5311-D7604	9c1483be-c582-4e5c-8521-bff2d3373ffa	40568	MAGI131-81c6	[Not Available]	Other, specify in notes	20	NO	20	[Not Available]	[Not Available]	[Not Available]	[Not Available]	1	Brachytherpy	mCi	mCi	40	1	INTUM	[Not Available]	[Not Available]	ADJUVANT	[Not Applicable]	40	[Not Available]
0061e9ef-df6a-414e-af64-c88f8192e2d3	TCGA-E1-5311	TCGA-E1-5311-D7609	093fbbe5-b3b5-4b77-aae3-1290f4970a0a	40568	CCNU	[Not Available]	Chemotherapy	2925	NO	3282	[Not Available]	[Not Available]	[Not Available]	[Not Available]	8	[Not Available]	mg/m2	mg	110	5	PO	[Not Available]	[Not Available]	PROGRESSION	[Not Applicable]	2000	[Not Available]
0061e9ef-df6a-414e-af64-c88f8192e2d3	TCGA-E1-5311	TCGA-E1-5311-D7613	3b12c8ac-446c-48f9-83c7-b47fd1922807	40568	VP-16	[Not Available]	Chemotherapy	3996	NO	4084	[Not Available]	[Not Available]	[Not Available]	[Not Available]	3	[Not Available]	mg/m2	mg	50	8	PO	[Not Available]	[Not Available]	PROGRESSION	[Not Applicable]	6930	[Not Available]
0061e9ef-df6a-414e-af64-c88f8192e2d3	TCGA-E1-5311	TCGA-E1-5311-D7606	d0f8800f-d92b-4fef-9e99-4ed9b6730e9b	40568	Karerltecin	[Not Available]	Chemotherapy	2825	NO	2848	[Not Available]	[Not Available]	[Not Available]	[Not Available]	1	[Not Available]	mg	mg	2.2	3	IV	[Not Available]	[Not Available]	PROGRESSION	[Not Applicable]	11	[Not Available]
0061e9ef-df6a-414e-af64-c88f8192e2d3	TCGA-E1-5311	TCGA-E1-5311-D7612	09853759-bc18-4985-a43b-250c56485528	40568	Cloretazine	[Not Available]	Chemotherapy	3868	NO	3996	[Not Available]	[Not Available]	[Not Available]	[Not Available]	3	[Not Available]	mg/m2	mg	300	7	IV	[Not Available]	[Not Available]	PROGRESSION	[Not Applicable]	2040	[Not Available]
0061e9ef-df6a-414e-af64-c88f8192e2d3	TCGA-E1-5311	TCGA-E1-5311-D7610	ab0c2859-49f7-44b4-95c2-cd241ada23fc	40568	Tamoxifen	[Not Available]	Hormone Therapy	3282	NO	3749	[Not Available]	[Not Available]	[Not Available]	[Not Available]	15	[Not Available]	mg	mg	100	6	PO	[Not Available]	[Not Available]	PROGRESSION	[Not Applicable]	84000	[Not Available]
400b2fa3-baf7-4baa-99b4-88b9f25b5049	TCGA-E1-5318	TCGA-E1-5318-D7629	0b29e6cd-3baa-44d6-8169-0fdb64b67e0e	40569	CCNU	[Not Available]	Chemotherapy	1655	NO	1904	[Not Available]	[Not Available]	[Not Available]	[Not Available]	3	[Not Available]	mg/m2	mg	110	7	PO	[Not Available]	[Not Available]	PROGRESSION	[Not Applicable]	540	[Not Available]
400b2fa3-baf7-4baa-99b4-88b9f25b5049	TCGA-E1-5318	TCGA-E1-5318-D7623	d27f585c-53c0-431f-ab79-d54b772620ce	40569	Gliadel Wafers	[Not Available]	Chemotherapy	1043	NO	1231	[Not Available]	[Not Available]	[Not Available]	[Not Available]	1	[Not Available]	{Wafer}	{Wafer}	8	4	INTUM	[Not Available]	[Not Available]	PROGRESSION	[Not Applicable]	8	[Not Available]
400b2fa3-baf7-4baa-99b4-88b9f25b5049	TCGA-E1-5318	TCGA-E1-5318-D7636	feb703c5-9c8f-4b8f-8353-1131d01355ee	40569	CPT-11	[Not Available]	Chemotherapy	2127	NO	2211	[Not Available]	[Not Available]	[Not Available]	[Not Available]	2	[Not Available]	mg/m2	mg	260	11	IV	[Not Available]	[Not Available]	ADJUVANT	[Not Applicable]	3400	[Not Available]
400b2fa3-baf7-4baa-99b4-88b9f25b5049	TCGA-E1-5318	TCGA-E1-5318-D7635	40ce51f2-557a-411e-b618-642259b5929d	40569	CPT-11	[Not Available]	Chemotherapy	2023	NO	2127	[Not Available]	[Not Available]	[Not Available]	[Not Available]	1	[Not Available]	mg/m2	mg	350	10	IV	[Not Available]	[Not Available]	PROGRESSION	[Not Applicable]	1710	[Not Available]
400b2fa3-baf7-4baa-99b4-88b9f25b5049	TCGA-E1-5318	TCGA-E1-5318-D7630	b198aef2-c997-4ab1-b5a8-b44b8baca604	40569	CCNU	[Not Available]	Chemotherapy	1904	NO	1971	[Not Available]	[Not Available]	[Not Available]	[Not Available]	2	[Not Available]	mg/m2	mg	82.5	8	PO	[Not Available]	[Not Available]	ADJUVANT	[Not Applicable]	280	[Not Available]
400b2fa3-baf7-4baa-99b4-88b9f25b5049	TCGA-E1-5318	TCGA-E1-5318-D7638	7969fe3e-4682-4dee-bff6-7132ab8e916c	40569	Procarbazine	[Not Available]	Chemotherapy	2211	NO	2267	[Not Available]	[Not Available]	[Not Available]	[Not Available]	2	[Not Available]	mg/m2	mg	75	12	PO	[Not Available]	[Not Available]	PROGRESSION	[Not Applicable]	6720	[Not Available]
400b2fa3-baf7-4baa-99b4-88b9f25b5049	TCGA-E1-5318	TCGA-E1-5318-D7645	ead855f0-e402-4be5-b160-3036d37fb8ed	40569	CCNU	[Not Available]	Chemotherapy	2268	NO	2335	[Not Available]	[Not Available]	[Not Available]	[Not Available]	2	[Not Available]	mg/m2	mg	82.5	13	PO	[Not Available]	[Not Available]	PROGRESSION	[Not Applicable]	280	[Not Available]
400b2fa3-baf7-4baa-99b4-88b9f25b5049	TCGA-E1-5318	TCGA-E1-5318-D7620	c339ebe1-aa49-47c8-8088-5428d4e2f3b2	40569	Temazolomide	[Not Available]	Chemotherapy	781	NO	824	[Not Available]	[Not Available]	[Not Available]	[Not Available]	1	[Not Available]	mg/m2	mg	200	2	PO	[Not Available]	[Not Available]	ADJUVANT	[Not Applicable]	1650	[Not Available]
400b2fa3-baf7-4baa-99b4-88b9f25b5049	TCGA-E1-5318	TCGA-E1-5318-D7631	4fbbc709-b41c-4ba8-ac98-21ead1ae43cf	40569	Cytoxan	[Not Available]	Chemotherapy	1980	NO	2043	[Not Available]	[Not Available]	[Not Available]	[Not Available]	2	[Not Available]	mg	mg	100	9	PO	[Not Available]	[Not Available]	ADJUVANT	[Not Applicable]	5600	[Not Available]
400b2fa3-baf7-4baa-99b4-88b9f25b5049	TCGA-E1-5318	TCGA-E1-5318-D7622	74468cb9-fcf4-4b97-a28f-164a5d94f934	40569	Temozolomide	[Not Available]	Chemotherapy	824	NO	1026	[Not Available]	[Not Available]	[Not Available]	[Not Available]	7	[Not Available]	mg/m2	mg	150	3	PO	[Not Available]	[Not Available]	ADJUVANT	[Not Applicable]	8400	[Not Available]
400b2fa3-baf7-4baa-99b4-88b9f25b5049	TCGA-E1-5318	TCGA-E1-5318-D7619	c5a29f35-97d1-47f2-87fb-afa2b3ce97e5	40569	Carboplatin	[Not Available]	Chemotherapy	385	NO	781	[Not Available]	[Not Available]	[Not Available]	[Not Available]	11	[Not Available]	mg/m2	mg	560	1	IV	[Not Available]	[Not Available]	PROGRESSION	[Not Applicable]	6507	[Not Available]
400b2fa3-baf7-4baa-99b4-88b9f25b5049	TCGA-E1-5318	TCGA-E1-5318-D7633	bf3b38cc-7ed0-4a72-a3ff-78ce8f745487	40569	Celebrex	[Not Available]	Other, specify in notes	1980	NO	2043	[Not Available]	[Not Available]	[Not Available]	[Not Available]	2	NSAIDs	mg	mg	400	9	PO	[Not Available]	[Not Available]	PROGRESSION	[Not Applicable]	44800	[Not Available]
400b2fa3-baf7-4baa-99b4-88b9f25b5049	TCGA-E1-5318	TCGA-E1-5318-D7628	ed6e5212-874d-425d-8a55-fc01a6fe7210	40569	VP-16	[Not Available]	Chemotherapy	1590	NO	1652	[Not Available]	[Not Available]	[Not Available]	[Not Available]	2	[Not Available]	mg/m2	mg	50	9	PO	[Not Available]	[Not Available]	PROGRESSION	[Not Applicable]	3000	[Not Available]
400b2fa3-baf7-4baa-99b4-88b9f25b5049	TCGA-E1-5318	TCGA-E1-5318-D7641	f3a68eda-ff46-4f81-a053-350e269044ed	40569	Tamoxiten	[Not Available]	Hormone Therapy	2211	NO	2267	[Not Available]	[Not Available]	[Not Available]	[Not Available]	2	[Not Available]	mg	mg	80	12	PO	[Not Available]	[Not Available]	PROGRESSION	[Not Applicable]	4480	[Not Available]
84569c1a-6baa-4380-ae3c-707df1be4618	TCGA-E1-5319	TCGA-E1-5319-D16174	6d31737d-4921-402e-bc85-10d762ed7932	40773	Temodar	[Not Available]	Chemotherapy	952	NO	1385	[Not Available]	[Not Available]	[Not Available]	[Not Available]	13	[Not Available]	mg/m2	mg	200	1	PO	[Not Available]	[Not Available]	PROGRESSION	[Not Applicable]	26650	[Not Available]
84569c1a-6baa-4380-ae3c-707df1be4618	TCGA-E1-5319	TCGA-E1-5319-D16175	d27d6d3e-f1bc-4afe-80ec-a894e4d73091	40774	Celebrex	[Not Available]	Other, specify in notes	1385	NO	1511	[Not Available]	[Not Available]	[Not Available]	[Not Available]	4	Antiongigenic	mg	mg	800	2	PO	[Not Available]	[Not Available]	ADJUVANT	[Not Applicable]	95200	[Not Available]
84569c1a-6baa-4380-ae3c-707df1be4618	TCGA-E1-5319	TCGA-E1-5319-D16177	04a91ee2-d48f-4bdd-b621-ddab8425a59a	40774	Carboplatin	[Not Available]	Chemotherapy	1933	NO	1993	[Not Available]	[Not Available]	[Not Available]	[Not Available]	2	[Not Available]	mg/m2	mg	450	4	PO	[Not Available]	[Not Available]	PROGRESSION	[Not Applicable]	50400	[Not Available]
84569c1a-6baa-4380-ae3c-707df1be4618	TCGA-E1-5319	TCGA-E1-5319-D16176	b869d193-25b4-4aae-beaa-6f44acda704a	40774	Carboplatin	[Not Available]	Chemotherapy	1826	NO	1933	[Not Available]	[Not Available]	[Not Available]	[Not Available]	3	[Not Available]	mg/m2	mg	560	3	PO	[Not Available]	[Not Available]	PROGRESSION	[Not Applicable]	94920	[Not Available]
84569c1a-6baa-4380-ae3c-707df1be4618	TCGA-E1-5319	TCGA-E1-5319-D16179	d5514219-5b0e-482f-a2af-027c0ba5427b	40777	CCNU	[Not Available]	Chemotherapy	2322	NO	2364	[Not Available]	[Not Available]	[Not Available]	[Not Available]	1	[Not Available]	mg/m2	mg	110	6	PO	[Not Available]	[Not Available]	PROGRESSION	[Not Applicable]	240	[Not Available]
84569c1a-6baa-4380-ae3c-707df1be4618	TCGA-E1-5319	TCGA-E1-5319-D16178	90657aae-3bf5-4ed4-9b0b-9588f876b750	40777	Temodar	[Not Available]	Chemotherapy	2029	NO	2121	[Not Available]	[Not Available]	[Not Available]	[Not Available]	2	[Not Available]	mg/m2	mg	200	5	PO	[Not Available]	[Not Available]	PROGRESSION	[Not Applicable]	4000	[Not Available]
84569c1a-6baa-4380-ae3c-707df1be4618	TCGA-E1-5319	TCGA-E1-5319-D16180	561946e1-a96c-47aa-ae5f-3f1dd8684ea5	40778	CCNU	[Not Available]	Chemotherapy	2364	NO	2433	[Not Available]	[Not Available]	[Not Available]	[Not Available]	1	[Not Available]	mg/m2	mg	82.5	7	PO	[Not Available]	[Not Available]	PROGRESSION	[Not Applicable]	180	[Not Available]
84569c1a-6baa-4380-ae3c-707df1be4618	TCGA-E1-5319	TCGA-E1-5319-D16181	da80b4cc-3bf5-4b0b-8f98-d2fb84c55973	40778	VP-16	[Not Available]	Chemotherapy	2433	NO	2587	[Not Available]	[Not Available]	[Not Available]	[Not Available]	3	[Not Available]	mg/m2	mg	50	8	PO	[Not Available]	[Not Available]	PROGRESSION	[Not Applicable]	6300	[Not Available]
84569c1a-6baa-4380-ae3c-707df1be4618	TCGA-E1-5319	TCGA-E1-5319-D16182	1e479794-aec8-4230-b7e8-f00f75cf7bf9	40779	VP-16	[Not Available]	Chemotherapy	2587	NO	2818	[Not Available]	[Not Available]	[Not Available]	[Not Available]	6	[Not Available]	mg/m2	mg	25	9	PO	[Not Available]	[Not Available]	ADJUVANT	[Not Applicable]	6300	[Not Available]
5ea230a6-77aa-4aa5-867c-09651d481d8b	TCGA-E1-5322	TCGA-E1-5322-D7467	5f1f8156-edae-4626-873b-b85e38a002d4	40570	Gliadel Wafer	[Not Available]	Chemotherapy	1085	NO	1109	[Not Available]	[Not Available]	[Not Available]	[Not Available]	7	[Not Available]	{Wafer}	{Wafer}	8	1	INTUM	[Not Available]	[Not Available]	ADJUVANT	[Not Applicable]	8	[Not Available]
457EC7F6-8612-4641-AAEF-8A7F2C44C30C	TCGA-E1-A7YD	TCGA-E1-A7YD-D61159	3901572E-7813-4FBB-8E34-1C99B7646119	41865	CCNU	[Not Available]	Chemotherapy	111	NO	285	Clinical Progressive Disease	[Not Available]	[Not Available]	[Not Available]	[Not Available]	[Not Available]	[Not Available]	[Not Available]	[Not Available]	[Not Available]	[Not Available]	[Not Available]	[Not Available]	[Not Available]	[Not Applicable]	[Not Available]	NO
457EC7F6-8612-4641-AAEF-8A7F2C44C30C	TCGA-E1-A7YD	TCGA-E1-A7YD-D61160	DDC53550-72CF-4515-9AAB-013E69C0E58E	41865	Temodar	[Not Available]	Chemotherapy	314	YES	[Not Available]	[Unknown]	[Not Available]	[Not Available]	[Not Available]	[Not Available]	[Not Available]	[Not Available]	[Not Available]	[Not Available]	[Not Available]	[Not Available]	[Not Available]	[Not Available]	[Not Available]	[Not Applicable]	[Not Available]	NO
F842F756-CE78-4C99-BCF8-3BCE18A4D9EF	TCGA-E1-A7YE	TCGA-E1-A7YE-D61167	FEC71CDC-DE35-494B-98CD-D6220CBB39BD	41865	CCNU	[Not Available]	Chemotherapy	81	NO	185	Clinical Progressive Disease	[Not Available]	[Not Available]	[Not Available]	[Not Available]	[Not Available]	[Not Available]	[Not Available]	[Not Available]	[Not Available]	[Not Available]	[Not Available]	[Not Available]	[Not Available]	[Not Applicable]	[Not Available]	NO
F842F756-CE78-4C99-BCF8-3BCE18A4D9EF	TCGA-E1-A7YE	TCGA-E1-A7YE-D61171	749626B5-D27B-4310-97E3-98021E6D8405	41865	CCNU	[Not Available]	Chemotherapy	378	NO	468	Clinical Progressive Disease	[Not Available]	[Not Available]	[Not Available]	[Not Available]	[Not Available]	[Not Available]	[Not Available]	[Not Available]	[Not Available]	[Not Available]	[Not Available]	[Not Available]	[Not Available]	[Not Applicable]	[Not Available]	NO
F842F756-CE78-4C99-BCF8-3BCE18A4D9EF	TCGA-E1-A7YE	TCGA-E1-A7YE-D61176	B567E6D2-B15B-4B4B-A61F-3D3DF2F38AE4	41865	Gliadel wafers	[Not Available]	Chemotherapy	237	NO	237	Stable Disease	[Not Available]	[Not Available]	[Not Available]	[Not Available]	[Not Available]	[Not Available]	[Not Available]	[Not Available]	[Not Available]	[Not Available]	[Not Available]	[Not Available]	[Not Available]	[Not Applicable]	[Not Available]	NO
F842F756-CE78-4C99-BCF8-3BCE18A4D9EF	TCGA-E1-A7YE	TCGA-E1-A7YE-D61182	8A4C234D-7FE4-4E07-9CD1-2A9F114D0155	41865	Temodar	[Not Available]	[Not Available]	482	NO	695	Clinical Progressive Disease	[Not Available]	[Not Available]	[Not Available]	[Not Available]	[Not Available]	[Not Available]	[Not Available]	[Not Available]	[Not Available]	[Not Available]	[Not Available]	[Not Available]	[Not Available]	[Not Applicable]	[Not Available]	NO
F842F756-CE78-4C99-BCF8-3BCE18A4D9EF	TCGA-E1-A7YE	TCGA-E1-A7YE-D61183	49132B44-9583-4FFA-B258-1E1AB02D5463	41865	Celebrex	[Not Available]	Ancillary	469	NO	703	Clinical Progressive Disease	[Not Available]	[Not Available]	[Not Available]	[Not Available]	[Not Available]	[Not Available]	[Not Available]	[Not Available]	[Not Available]	[Not Available]	[Not Available]	[Not Available]	[Not Available]	[Not Applicable]	[Not Available]	NO
F842F756-CE78-4C99-BCF8-3BCE18A4D9EF	TCGA-E1-A7YE	TCGA-E1-A7YE-D61185	FC58BB6D-E623-4730-A2E4-6E20F62D0660	41865	Temodar	[Not Available]	Chemotherapy	704	NO	731	Clinical Progressive Disease	[Not Available]	[Not Available]	[Not Available]	[Not Available]	[Not Available]	[Not Available]	[Not Available]	[Not Available]	[Not Available]	[Not Available]	[Not Available]	[Not Available]	[Not Available]	[Not Applicable]	[Not Available]	NO
F842F756-CE78-4C99-BCF8-3BCE18A4D9EF	TCGA-E1-A7YE	TCGA-E1-A7YE-D61186	16DD15B7-73A8-4C14-A3DA-44798CC4F85B	41865	Benzylguanine	[Not Available]	Targeted Molecular therapy	704	NO	731	Clinical Progressive Disease	[Not Available]	[Not Available]	[Not Available]	[Not Available]	[Not Available]	[Not Available]	[Not Available]	[Not Available]	[Not Available]	[Not Available]	[Not Available]	[Not Available]	[Not Available]	[Not Applicable]	[Not Available]	YES
F842F756-CE78-4C99-BCF8-3BCE18A4D9EF	TCGA-E1-A7YE	TCGA-E1-A7YE-D61190	D184A86B-A497-489C-B3A2-942FA29B3C16	41865	Karenitecin	[Not Available]	Chemotherapy	715	NO	787	Clinical Progressive Disease	[Not Available]	[Not Available]	[Not Available]	[Not Available]	[Not Available]	[Not Available]	[Not Available]	[Not Available]	[Not Available]	[Not Available]	[Not Available]	[Not Available]	[Not Available]	[Not Applicable]	[Not Available]	YES
F842F756-CE78-4C99-BCF8-3BCE18A4D9EF	TCGA-E1-A7YE	TCGA-E1-A7YE-D61221	F26BB5B1-A15D-4B38-9446-7F43647D04B8	41865	VP-16	[Not Available]	Chemotherapy	790	NO	845	Clinical Progressive Disease	[Not Available]	[Not Available]	[Not Available]	[Not Available]	[Not Available]	[Not Available]	[Not Available]	[Not Available]	[Not Available]	[Not Available]	[Not Available]	[Not Available]	[Not Available]	[Not Applicable]	[Not Available]	NO
9F469EDB-6B12-4EAB-BD6F-9C10034D4CB7	TCGA-E1-A7YH	TCGA-E1-A7YH-D61224	C3FB6DAF-CC6E-4337-A4D9-428A04D885F1	41865	Temodar	[Not Available]	Chemotherapy	45	NO	87	Stable Disease	[Not Available]	[Not Available]	[Not Available]	[Not Available]	[Not Available]	[Not Available]	[Not Available]	[Not Available]	[Not Available]	[Not Available]	[Not Available]	[Not Available]	[Not Available]	[Not Applicable]	[Not Available]	NO
9F469EDB-6B12-4EAB-BD6F-9C10034D4CB7	TCGA-E1-A7YH	TCGA-E1-A7YH-D61225	5ABFE853-898E-4AE7-B004-84BA9C9F538A	41865	CCNU	[Not Available]	Chemotherapy	117	NO	216	Stable Disease	[Not Available]	[Not Available]	[Not Available]	[Not Available]	[Not Available]	[Not Available]	[Not Available]	[Not Available]	[Not Available]	[Not Available]	[Not Available]	[Not Available]	[Not Available]	[Not Applicable]	[Not Available]	NO
9F469EDB-6B12-4EAB-BD6F-9C10034D4CB7	TCGA-E1-A7YH	TCGA-E1-A7YH-D61226	497713B5-E927-49B8-BCDF-987ED2BD152D	41865	Temodar	[Not Available]	Chemotherapy	222	NO	537	[Unknown]	[Not Available]	[Not Available]	[Not Available]	[Not Available]	[Not Available]	[Not Available]	[Not Available]	[Not Available]	[Not Available]	[Not Available]	[Not Available]	[Not Available]	[Not Available]	[Not Applicable]	[Not Available]	NO
9F469EDB-6B12-4EAB-BD6F-9C10034D4CB7	TCGA-E1-A7YH	TCGA-E1-A7YH-D61228	AED54027-D9B2-47BF-A61C-FE8F7F7A96CD	41865	Temodar	[Not Available]	Chemotherapy	706	NO	752	Clinical Progressive Disease	[Not Available]	[Not Available]	[Not Available]	[Not Available]	[Not Available]	[Not Available]	[Not Available]	[Not Available]	[Not Available]	[Not Available]	[Not Available]	[Not Available]	[Not Available]	[Not Applicable]	[Not Available]	NO
9F469EDB-6B12-4EAB-BD6F-9C10034D4CB7	TCGA-E1-A7YH	TCGA-E1-A7YH-D61231	0E15F21A-0740-4CEA-8117-F322CA019484	41865	Temodar	[Not Available]	Chemotherapy	775	NO	835	Clinical Progressive Disease	[Not Available]	[Not Available]	[Not Available]	[Not Available]	[Not Available]	[Not Available]	[Not Available]	[Not Available]	[Not Available]	[Not Available]	[Not Available]	[Not Available]	[Not Available]	[Not Applicable]	[Not Available]	NO
9F469EDB-6B12-4EAB-BD6F-9C10034D4CB7	TCGA-E1-A7YH	TCGA-E1-A7YH-D61234	4C28D915-D694-4549-BDCD-78BB263BA535	41865	Erlotinib	[Not Available]	Chemotherapy	867	NO	1223	Stable Disease	[Not Available]	[Not Available]	[Not Available]	[Not Available]	[Not Available]	[Not Available]	[Not Available]	[Not Available]	[Not Available]	[Not Available]	[Not Available]	[Not Available]	[Not Available]	[Not Applicable]	[Not Available]	YES
9F469EDB-6B12-4EAB-BD6F-9C10034D4CB7	TCGA-E1-A7YH	TCGA-E1-A7YH-D61235	9D2F071F-A519-4608-8897-8CB965C09A4C	41865	Avastin	[Not Available]	[Not Available]	867	NO	1223	Stable Disease	[Not Available]	[Not Available]	[Not Available]	[Not Available]	[Not Available]	[Not Available]	[Not Available]	[Not Available]	[Not Available]	[Not Available]	[Not Available]	[Not Available]	[Not Available]	[Not Applicable]	[Not Available]	YES
9F469EDB-6B12-4EAB-BD6F-9C10034D4CB7	TCGA-E1-A7YH	TCGA-E1-A7YH-D61236	7CAE29FD-FD85-47BA-B60F-BBE33F7D49FF	41865	Avastin	[Not Available]	[Not Available]	1224	NO	1328	Clinical Progressive Disease	[Not Available]	[Not Available]	[Not Available]	[Not Available]	[Not Available]	[Not Available]	[Not Available]	[Not Available]	[Not Available]	[Not Available]	[Not Available]	[Not Available]	[Not Available]	[Not Applicable]	[Not Available]	NO
9F469EDB-6B12-4EAB-BD6F-9C10034D4CB7	TCGA-E1-A7YH	TCGA-E1-A7YH-D61238	9CEF76EB-E81C-4496-A154-0999F535C7E9	41865	VP-16	[Not Available]	Chemotherapy	1345	NO	1627	Clinical Progressive Disease	[Not Available]	[Not Available]	[Not Available]	[Not Available]	[Not Available]	[Not Available]	[Not Available]	[Not Available]	[Not Available]	[Not Available]	[Not Available]	[Not Available]	[Not Available]	[Not Applicable]	[Not Available]	NO
BC6FBB3C-870D-40B5-983B-7C88705E020D	TCGA-E1-A7YJ	TCGA-E1-A7YJ-D61250	B7766092-014A-4022-B955-64E79DCB5CF6	41866	Temodar	[Not Available]	Chemotherapy	39	NO	84	Stable Disease	[Not Available]	[Not Available]	[Not Available]	[Not Available]	[Not Available]	[Not Available]	[Not Available]	[Not Available]	[Not Available]	[Not Available]	[Not Available]	[Not Available]	[Not Available]	[Not Applicable]	[Not Available]	NO
BC6FBB3C-870D-40B5-983B-7C88705E020D	TCGA-E1-A7YJ	TCGA-E1-A7YJ-D61252	BC5EE672-52C4-4BF2-B34C-19B1F8E3EB2E	41866	CPT-11	[Not Available]	Chemotherapy	96	NO	144	Stable Disease	[Not Available]	[Not Available]	[Not Available]	[Not Available]	[Not Available]	[Not Available]	[Not Available]	[Not Available]	[Not Available]	[Not Available]	[Not Available]	[Not Available]	[Not Available]	[Not Applicable]	[Not Available]	NO
BC6FBB3C-870D-40B5-983B-7C88705E020D	TCGA-E1-A7YJ	TCGA-E1-A7YJ-D61253	54D88AA0-390E-4D3F-ABF4-A143045CF5F6	41866	Avastin	[Not Available]	Immunotherapy	96	NO	504	Clinical Progressive Disease	[Not Available]	[Not Available]	[Not Available]	[Not Available]	[Not Available]	[Not Available]	[Not Available]	[Not Available]	[Not Available]	[Not Available]	[Not Available]	[Not Available]	[Not Available]	[Not Applicable]	[Not Available]	NO
BC6FBB3C-870D-40B5-983B-7C88705E020D	TCGA-E1-A7YJ	TCGA-E1-A7YJ-D61254	E73CAFDA-7537-40C4-96BB-C655A0C45770	41866	Temodar	[Not Available]	Chemotherapy	96	NO	518	Clinical Progressive Disease	[Not Available]	[Not Available]	[Not Available]	[Not Available]	[Not Available]	[Not Available]	[Not Available]	[Not Available]	[Not Available]	[Not Available]	[Not Available]	[Not Available]	[Not Available]	[Not Applicable]	[Not Available]	NO
BC6FBB3C-870D-40B5-983B-7C88705E020D	TCGA-E1-A7YJ	TCGA-E1-A7YJ-D61258	FC1FB192-BAC6-4038-87DE-C3EA5C46495F	41866	MR1-1	[Not Available]	Immunotherapy	537	NO	541	Clinical Progressive Disease	[Not Available]	[Not Available]	[Not Available]	[Not Available]	[Not Available]	[Not Available]	[Not Available]	[Not Available]	[Not Available]	[Not Available]	[Not Available]	[Not Available]	[Not Available]	[Not Applicable]	[Not Available]	YES
BB4A30D5-4EBA-45DB-B05A-BD843044D508	TCGA-E1-A7YK	TCGA-E1-A7YK-D61284	04EACA74-1CCC-4875-BDC6-D7D6849194E7	41866	Temodar	[Not Available]	Chemotherapy	27	NO	68	Stable Disease	[Not Available]	[Not Available]	[Not Available]	[Not Available]	[Not Available]	[Not Available]	[Not Available]	[Not Available]	[Not Available]	[Not Available]	[Not Available]	[Not Available]	[Not Available]	[Not Applicable]	[Not Available]	NO
BB4A30D5-4EBA-45DB-B05A-BD843044D508	TCGA-E1-A7YK	TCGA-E1-A7YK-D61286	21B1EFC1-D066-448B-862F-6CE7E60C5790	41866	Temodar	[Not Available]	Chemotherapy	90	NO	[Not Available]	[Unknown]	[Not Available]	[Not Available]	[Not Available]	[Not Available]	[Not Available]	[Not Available]	[Not Available]	[Not Available]	[Not Available]	[Not Available]	[Not Available]	[Not Available]	[Not Available]	[Not Applicable]	[Not Available]	NO
96D9249E-501C-49E0-9559-01DA978A9CA6	TCGA-E1-A7YL	TCGA-E1-A7YL-D61291	4317867D-7C62-469A-95AA-747361F74413	41866	Temodar	[Not Available]	Chemotherapy	36	NO	78	Clinical Progressive Disease	[Not Available]	[Not Available]	[Not Available]	[Not Available]	[Not Available]	[Not Available]	[Not Available]	[Not Available]	[Not Available]	[Not Available]	[Not Available]	[Not Available]	[Not Available]	[Not Applicable]	[Not Available]	NO
96D9249E-501C-49E0-9559-01DA978A9CA6	TCGA-E1-A7YL	TCGA-E1-A7YL-D61294	C0F27550-D2A5-4841-9DB5-5F2E51B66CB1	41866	Avastin	[Not Available]	Immunotherapy	103	NO	289	Clinical Progressive Disease	[Not Available]	[Not Available]	[Not Available]	[Not Available]	[Not Available]	[Not Available]	[Not Available]	[Not Available]	[Not Available]	[Not Available]	[Not Available]	[Not Available]	[Not Available]	[Not Applicable]	[Not Available]	NO
96D9249E-501C-49E0-9559-01DA978A9CA6	TCGA-E1-A7YL	TCGA-E1-A7YL-D61295	381F4079-84C8-43DF-9231-EB5855F3D737	41866	Carboplatin	[Not Available]	Chemotherapy	103	NO	263	Clinical Progressive Disease	[Not Available]	[Not Available]	[Not Available]	[Not Available]	[Not Available]	[Not Available]	[Not Available]	[Not Available]	[Not Available]	[Not Available]	[Not Available]	[Not Available]	[Not Available]	[Not Applicable]	[Not Available]	NO
96D9249E-501C-49E0-9559-01DA978A9CA6	TCGA-E1-A7YL	TCGA-E1-A7YL-D61296	3FCCA485-3EB4-434A-8384-FEB790C031C9	41866	CPT-11	[Not Available]	Chemotherapy	103	NO	249	Clinical Progressive Disease	[Not Available]	[Not Available]	[Not Available]	[Not Available]	[Not Available]	[Not Available]	[Not Available]	[Not Available]	[Not Available]	[Not Available]	[Not Available]	[Not Available]	[Not Available]	[Not Applicable]	[Not Available]	NO
96D9249E-501C-49E0-9559-01DA978A9CA6	TCGA-E1-A7YL	TCGA-E1-A7YL-D61298	51D62C27-BDAA-41CB-8E94-6D04F00C02D2	41866	Avastin	[Not Available]	Immunotherapy	298	NO	336	Clinical Progressive Disease	[Not Available]	[Not Available]	[Not Available]	[Not Available]	[Not Available]	[Not Available]	[Not Available]	[Not Available]	[Not Available]	[Not Available]	[Not Available]	[Not Available]	[Not Available]	[Not Applicable]	[Not Available]	NO
96D9249E-501C-49E0-9559-01DA978A9CA6	TCGA-E1-A7YL	TCGA-E1-A7YL-D61299	6D0E7573-4BF2-4CFF-A210-88ADE42D77F3	41866	VP-16	[Not Available]	Chemotherapy	298	NO	325	Clinical Progressive Disease	[Not Available]	[Not Available]	[Not Available]	[Not Available]	[Not Available]	[Not Available]	[Not Available]	[Not Available]	[Not Available]	[Not Available]	[Not Available]	[Not Available]	[Not Available]	[Not Applicable]	[Not Available]	NO
4250AC3C-C8B0-46CE-B9C8-7963BC386041	TCGA-E1-A7YM	TCGA-E1-A7YM-D61418	D12571FF-CF1C-4376-8885-5B7847CBE49D	41866	Temodar	[Not Available]	Chemotherapy	27	NO	75	Clinical Progressive Disease	[Not Available]	[Not Available]	[Not Available]	[Not Available]	[Not Available]	[Not Available]	[Not Available]	[Not Available]	[Not Available]	[Not Available]	[Not Available]	[Not Available]	[Not Available]	[Not Applicable]	[Not Available]	NO
4250AC3C-C8B0-46CE-B9C8-7963BC386041	TCGA-E1-A7YM	TCGA-E1-A7YM-D61420	C19BA868-82B4-412A-8743-11B35002A24A	41866	Avastin	[Not Available]	Immunotherapy	90	NO	137	Stable Disease	[Not Available]	[Not Available]	[Not Available]	[Not Available]	[Not Available]	[Not Available]	[Not Available]	[Not Available]	[Not Available]	[Not Available]	[Not Available]	[Not Available]	[Not Available]	[Not Applicable]	[Not Available]	NO
4250AC3C-C8B0-46CE-B9C8-7963BC386041	TCGA-E1-A7YM	TCGA-E1-A7YM-D61421	D5FB8A4A-6DF7-4FF6-8385-7687062849D3	41866	CPT-11	[Not Available]	Chemotherapy	90	NO	137	Stable Disease	[Not Available]	[Not Available]	[Not Available]	[Not Available]	[Not Available]	[Not Available]	[Not Available]	[Not Available]	[Not Available]	[Not Available]	[Not Available]	[Not Available]	[Not Available]	[Not Applicable]	[Not Available]	NO
4250AC3C-C8B0-46CE-B9C8-7963BC386041	TCGA-E1-A7YM	TCGA-E1-A7YM-D61422	63EF275B-6B0B-4476-B394-82070A5BCCB8	41866	Avastin	[Not Available]	Immunotherapy	137	NO	174	Stable Disease	[Not Available]	[Not Available]	[Not Available]	[Not Available]	[Not Available]	[Not Available]	[Not Available]	[Not Available]	[Not Available]	[Not Available]	[Not Available]	[Not Available]	[Not Available]	[Not Applicable]	[Not Available]	NO
4250AC3C-C8B0-46CE-B9C8-7963BC386041	TCGA-E1-A7YM	TCGA-E1-A7YM-D61423	B35CE46A-7BDC-4879-A729-1EAE5D2F1392	41866	VP-16	[Not Available]	Chemotherapy	137	NO	164	Stable Disease	[Not Available]	[Not Available]	[Not Available]	[Not Available]	[Not Available]	[Not Available]	[Not Available]	[Not Available]	[Not Available]	[Not Available]	[Not Available]	[Not Available]	[Not Available]	[Not Applicable]	[Not Available]	NO
4250AC3C-C8B0-46CE-B9C8-7963BC386041	TCGA-E1-A7YM	TCGA-E1-A7YM-D61424	53B68102-4413-48E8-9C09-F96B6B18859E	41866	Avastin	[Not Available]	Immunotherapy	174	NO	497	Clinical Progressive Disease	[Not Available]	[Not Available]	[Not Available]	[Not Available]	[Not Available]	[Not Available]	[Not Available]	[Not Available]	[Not Available]	[Not Available]	[Not Available]	[Not Available]	[Not Available]	[Not Applicable]	[Not Available]	NO
4250AC3C-C8B0-46CE-B9C8-7963BC386041	TCGA-E1-A7YM	TCGA-E1-A7YM-D61426	CB216B91-BE59-4485-99E3-A36277377673	41866	Avastin	[Not Available]	Immunotherapy	501	NO	593	Stable Disease	[Not Available]	[Not Available]	[Not Available]	[Not Available]	[Not Available]	[Not Available]	[Not Available]	[Not Available]	[Not Available]	[Not Available]	[Not Available]	[Not Available]	[Not Available]	[Not Applicable]	[Not Available]	NO
4250AC3C-C8B0-46CE-B9C8-7963BC386041	TCGA-E1-A7YM	TCGA-E1-A7YM-D61427	229207F3-DA7E-413B-A97B-B2FB4D0A291E	41866	Carboplatin	[Not Available]	Chemotherapy	501	NO	593	Stable Disease	[Not Available]	[Not Available]	[Not Available]	[Not Available]	[Not Available]	[Not Available]	[Not Available]	[Not Available]	[Not Available]	[Not Available]	[Not Available]	[Not Available]	[Not Available]	[Not Applicable]	[Not Available]	NO
BCC17E9A-6FE3-44FF-963C-D2D850A431F1	TCGA-E1-A7YN	TCGA-E1-A7YN-D61437	1A1B6155-B8EB-4E11-BA47-F01D0C6670DD	41866	Temodar	[Not Available]	Chemotherapy	35	NO	90	Stable Disease	[Not Available]	[Not Available]	[Not Available]	[Not Available]	[Not Available]	[Not Available]	[Not Available]	[Not Available]	[Not Available]	[Not Available]	[Not Available]	[Not Available]	[Not Available]	[Not Applicable]	[Not Available]	NO
BCC17E9A-6FE3-44FF-963C-D2D850A431F1	TCGA-E1-A7YN	TCGA-E1-A7YN-D61438	74ABFEC7-A861-4AD2-B928-6152BE300B73	41866	Temodar	[Not Available]	Chemotherapy	124	NO	369	Clinical Progressive Disease	[Not Available]	[Not Available]	[Not Available]	[Not Available]	[Not Available]	[Not Available]	[Not Available]	[Not Available]	[Not Available]	[Not Available]	[Not Available]	[Not Available]	[Not Available]	[Not Applicable]	[Not Available]	NO
BCC17E9A-6FE3-44FF-963C-D2D850A431F1	TCGA-E1-A7YN	TCGA-E1-A7YN-D61442	C21303E5-B241-4D5B-875A-8A02CA330EDB	41866	Avastin	[Not Available]	Immunotherapy	429	NO	484	Clinical Progressive Disease	[Not Available]	[Not Available]	[Not Available]	[Not Available]	[Not Available]	[Not Available]	[Not Available]	[Not Available]	[Not Available]	[Not Available]	[Not Available]	[Not Available]	[Not Available]	[Not Applicable]	[Not Available]	NO
BCC17E9A-6FE3-44FF-963C-D2D850A431F1	TCGA-E1-A7YN	TCGA-E1-A7YN-D61444	74A352D0-4BEB-482A-8997-1116C31AD09A	41866	Temodar	[Not Available]	Chemotherapy	429	NO	484	Clinical Progressive Disease	[Not Available]	[Not Available]	[Not Available]	[Not Available]	[Not Available]	[Not Available]	[Not Available]	[Not Available]	[Not Available]	[Not Available]	[Not Available]	[Not Available]	[Not Available]	[Not Applicable]	[Not Available]	NO
BCC17E9A-6FE3-44FF-963C-D2D850A431F1	TCGA-E1-A7YN	TCGA-E1-A7YN-D61450	8ED4B60C-CE8A-4638-830F-83A98961CAFD	41866	Avastin	[Not Available]	Immunotherapy	491	NO	553	Clinical Progressive Disease	[Not Available]	[Not Available]	[Not Available]	[Not Available]	[Not Available]	[Not Available]	[Not Available]	[Not Available]	[Not Available]	[Not Available]	[Not Available]	[Not Available]	[Not Available]	[Not Applicable]	[Not Available]	NO
BCC17E9A-6FE3-44FF-963C-D2D850A431F1	TCGA-E1-A7YN	TCGA-E1-A7YN-D61451	6BAB6C63-2436-4CC9-B2C8-01B94C4FEF9F	41866	CCNU	[Not Available]	Chemotherapy	506	NO	632	Clinical Progressive Disease	[Not Available]	[Not Available]	[Not Available]	[Not Available]	[Not Available]	[Not Available]	[Not Available]	[Not Available]	[Not Available]	[Not Available]	[Not Available]	[Not Available]	[Not Available]	[Not Applicable]	[Not Available]	NO
992452EE-8D9F-406B-9708-7BCB60062743	TCGA-E1-A7YO	TCGA-E1-A7YO-D61453	9D9F9B77-FDFB-420E-B458-FD367D8B7231	41866	I131-81C6	[Not Available]	Immunotherapy	23	NO	23	Stable Disease	[Not Available]	[Not Available]	[Not Available]	[Not Available]	[Not Available]	[Not Available]	[Not Available]	[Not Available]	[Not Available]	[Not Available]	[Not Available]	[Not Available]	[Not Available]	[Not Applicable]	[Not Available]	YES
75DBC8FB-4DB8-4764-824C-ECCF3A223884	TCGA-E1-A7YQ	TCGA-E1-A7YQ-D61539	90634921-7D21-4FA2-A5F5-727E4AACF439	41866	Temodar	[Not Available]	Chemotherapy	346	NO	396	Stable Disease	[Not Available]	[Not Available]	[Not Available]	[Not Available]	[Not Available]	[Not Available]	[Not Available]	[Not Available]	[Not Available]	[Not Available]	[Not Available]	[Not Available]	[Not Available]	[Not Applicable]	[Not Available]	NO
75DBC8FB-4DB8-4764-824C-ECCF3A223884	TCGA-E1-A7YQ	TCGA-E1-A7YQ-D61540	52EA3236-D091-43D8-B6B4-E9F026FFD823	41866	CCNU	[Not Available]	Chemotherapy	429	NO	512	Stable Disease	[Not Available]	[Not Available]	[Not Available]	[Not Available]	[Not Available]	[Not Available]	[Not Available]	[Not Available]	[Not Available]	[Not Available]	[Not Available]	[Not Available]	[Not Available]	[Not Applicable]	[Not Available]	NO
75DBC8FB-4DB8-4764-824C-ECCF3A223884	TCGA-E1-A7YQ	TCGA-E1-A7YQ-D61541	7A823A25-5BF8-44D6-95B4-4EE024A299B2	41866	Temodar	[Not Available]	Chemotherapy	532	NO	559	Clinical Progressive Disease	[Not Available]	[Not Available]	[Not Available]	[Not Available]	[Not Available]	[Not Available]	[Not Available]	[Not Available]	[Not Available]	[Not Available]	[Not Available]	[Not Available]	[Not Available]	[Not Applicable]	[Not Available]	NO
5E2539E0-2088-43DF-AD2A-F854D8BB6D30	TCGA-E1-A7YS	TCGA-E1-A7YS-D61559	2E2BE95F-A48A-4AA6-A723-E3789B943E9F	41866	Temodar	[Not Available]	Chemotherapy	67	NO	106	Stable Disease	[Not Available]	[Not Available]	[Not Available]	[Not Available]	[Not Available]	[Not Available]	[Not Available]	[Not Available]	[Not Available]	[Not Available]	[Not Available]	[Not Available]	[Not Available]	[Not Applicable]	[Not Available]	NO
5E2539E0-2088-43DF-AD2A-F854D8BB6D30	TCGA-E1-A7YS	TCGA-E1-A7YS-D61560	C5132DE8-7AA1-4C48-A553-400452DEB9CB	41866	Temodar	[Not Available]	Chemotherapy	127	NO	365	Stable Disease	[Not Available]	[Not Available]	[Not Available]	[Not Available]	[Not Available]	[Not Available]	[Not Available]	[Not Available]	[Not Available]	[Not Available]	[Not Available]	[Not Available]	[Not Available]	[Not Applicable]	[Not Available]	NO
FC3948FB-DF27-4149-BBFB-04443DFECC19	TCGA-E1-A7YU	TCGA-E1-A7YU-D61577	44D3E63F-E995-4857-8B11-4B9AA355DA5F	41866	I 131 81C6	[Not Available]	Immunotherapy	6	NO	6	[Unknown]	[Not Available]	[Not Available]	[Not Available]	[Not Available]	[Not Available]	[Not Available]	[Not Available]	[Not Available]	[Not Available]	[Not Available]	[Not Available]	[Not Available]	[Not Available]	[Not Applicable]	[Not Available]	YES
23C335F6-5749-4443-8AE8-61CCCBB137CB	TCGA-E1-A7YV	TCGA-E1-A7YV-D61580	7AD57CF9-00E2-4559-B7AD-40FBEAA4326E	41866	Temodar	[Not Available]	Chemotherapy	38	NO	82	Clinical Progressive Disease	[Not Available]	[Not Available]	[Not Available]	[Not Available]	[Not Available]	[Not Available]	[Not Available]	[Not Available]	[Not Available]	[Not Available]	[Not Available]	[Not Available]	[Not Available]	[Not Applicable]	[Not Available]	NO
23C335F6-5749-4443-8AE8-61CCCBB137CB	TCGA-E1-A7YV	TCGA-E1-A7YV-D61581	0506D544-A5D6-4023-BAD1-370DFC75744D	41866	Temodar	[Not Available]	Chemotherapy	70	NO	156	Clinical Progressive Disease	[Not Available]	[Not Available]	[Not Available]	[Not Available]	[Not Available]	[Not Available]	[Not Available]	[Not Available]	[Not Available]	[Not Available]	[Not Available]	[Not Available]	[Not Available]	[Not Applicable]	[Not Available]	NO
23C335F6-5749-4443-8AE8-61CCCBB137CB	TCGA-E1-A7YV	TCGA-E1-A7YV-D61583	4926D47F-2BAD-4C57-B6E8-73C812870A88	41866	Avastin	[Not Available]	Immunotherapy	195	NO	507	Clinical Progressive Disease	[Not Available]	[Not Available]	[Not Available]	[Not Available]	[Not Available]	[Not Available]	[Not Available]	[Not Available]	[Not Available]	[Not Available]	[Not Available]	[Not Available]	[Not Available]	[Not Applicable]	[Not Available]	NO
23C335F6-5749-4443-8AE8-61CCCBB137CB	TCGA-E1-A7YV	TCGA-E1-A7YV-D61585	6D3239C8-3331-4030-847F-FE7FC26AB248	41866	Avastin	[Not Available]	Immunotherapy	507	NO	674	Stable Disease	[Not Available]	[Not Available]	[Not Available]	[Not Available]	[Not Available]	[Not Available]	[Not Available]	[Not Available]	[Not Available]	[Not Available]	[Not Available]	[Not Available]	[Not Available]	[Not Applicable]	[Not Available]	NO
23C335F6-5749-4443-8AE8-61CCCBB137CB	TCGA-E1-A7YV	TCGA-E1-A7YV-D61586	53943E9C-9ABE-4A2C-9110-866DAE738672	41866	Gleevec	[Not Available]	Chemotherapy	507	NO	674	Stable Disease	[Not Available]	[Not Available]	[Not Available]	[Not Available]	[Not Available]	[Not Available]	[Not Available]	[Not Available]	[Not Available]	[Not Available]	[Not Available]	[Not Available]	[Not Available]	[Not Applicable]	[Not Available]	NO
23C335F6-5749-4443-8AE8-61CCCBB137CB	TCGA-E1-A7YV	TCGA-E1-A7YV-D61587	B074897E-18F6-4840-80E1-526B6416343C	41866	Gleevec	[Not Available]	Chemotherapy	678	NO	824	Clinical Progressive Disease	[Not Available]	[Not Available]	[Not Available]	[Not Available]	[Not Available]	[Not Available]	[Not Available]	[Not Available]	[Not Available]	[Not Available]	[Not Available]	[Not Available]	[Not Available]	[Not Applicable]	[Not Available]	NO
23C335F6-5749-4443-8AE8-61CCCBB137CB	TCGA-E1-A7YV	TCGA-E1-A7YV-D61589	0E78805C-5BFF-477A-8883-3F6CED061FCC	41866	Avastin	[Not Available]	Immunotherapy	846	NO	887	Clinical Progressive Disease	[Not Available]	[Not Available]	[Not Available]	[Not Available]	[Not Available]	[Not Available]	[Not Available]	[Not Available]	[Not Available]	[Not Available]	[Not Available]	[Not Available]	[Not Available]	[Not Applicable]	[Not Available]	NO
23C335F6-5749-4443-8AE8-61CCCBB137CB	TCGA-E1-A7YV	TCGA-E1-A7YV-D61590	DE30E03E-61B6-444E-9F9D-1141A44FEBE9	41866	Gleevec	[Not Available]	Chemotherapy	832	NO	887	Clinical Progressive Disease	[Not Available]	[Not Available]	[Not Available]	[Not Available]	[Not Available]	[Not Available]	[Not Available]	[Not Available]	[Not Available]	[Not Available]	[Not Available]	[Not Available]	[Not Available]	[Not Applicable]	[Not Available]	NO
23C335F6-5749-4443-8AE8-61CCCBB137CB	TCGA-E1-A7YV	TCGA-E1-A7YV-D61592	3DB2CB93-6AFA-4E43-9799-B5F624044D7B	41866	Avastin	[Not Available]	Immunotherapy	888	NO	948	Clinical Progressive Disease	[Not Available]	[Not Available]	[Not Available]	[Not Available]	[Not Available]	[Not Available]	[Not Available]	[Not Available]	[Not Available]	[Not Available]	[Not Available]	[Not Available]	[Not Available]	[Not Applicable]	[Not Available]	NO
23C335F6-5749-4443-8AE8-61CCCBB137CB	TCGA-E1-A7YV	TCGA-E1-A7YV-D61593	420D4CD3-B59D-4097-8180-B35DD38C51FA	41866	CPT-11	[Not Available]	Chemotherapy	888	NO	948	Clinical Progressive Disease	[Not Available]	[Not Available]	[Not Available]	[Not Available]	[Not Available]	[Not Available]	[Not Available]	[Not Available]	[Not Available]	[Not Available]	[Not Available]	[Not Available]	[Not Available]	[Not Applicable]	[Not Available]	NO
5EEF573E-6A44-4DC7-8AA7-B136863CE910	TCGA-E1-A7YW	TCGA-E1-A7YW-D61606	C6A6B183-A122-4AC1-B392-64D8EC4ED163	41866	CCNU	[Not Available]	Chemotherapy	711	NO	978	Clinical Progressive Disease	[Not Available]	[Not Available]	[Not Available]	[Not Available]	[Not Available]	[Not Available]	[Not Available]	[Not Available]	[Not Available]	[Not Available]	[Not Available]	[Not Available]	[Not Available]	[Not Applicable]	[Not Available]	NO
5EEF573E-6A44-4DC7-8AA7-B136863CE910	TCGA-E1-A7YW	TCGA-E1-A7YW-D61608	E95A013A-8E18-4D40-8DC6-F34CA45CFE04	41866	Avastin	[Not Available]	Immunotherapy	999	NO	1025	Stable Disease	[Not Available]	[Not Available]	[Not Available]	[Not Available]	[Not Available]	[Not Available]	[Not Available]	[Not Available]	[Not Available]	[Not Available]	[Not Available]	[Not Available]	[Not Available]	[Not Applicable]	[Not Available]	YES
5EEF573E-6A44-4DC7-8AA7-B136863CE910	TCGA-E1-A7YW	TCGA-E1-A7YW-D61609	EF7E27E9-3B2E-43DF-8540-076341AD9835	41866	CPT-11	[Not Available]	Chemotherapy	999	NO	1025	Stable Disease	[Not Available]	[Not Available]	[Not Available]	[Not Available]	[Not Available]	[Not Available]	[Not Available]	[Not Available]	[Not Available]	[Not Available]	[Not Available]	[Not Available]	[Not Available]	[Not Applicable]	[Not Available]	YES
5EEF573E-6A44-4DC7-8AA7-B136863CE910	TCGA-E1-A7YW	TCGA-E1-A7YW-D61610	20DC6FA9-757C-4537-902C-7A29D6290FCF	41866	VP-16	[Not Available]	Chemotherapy	1040	NO	1095	Clinical Progressive Disease	[Not Available]	[Not Available]	[Not Available]	[Not Available]	[Not Available]	[Not Available]	[Not Available]	[Not Available]	[Not Available]	[Not Available]	[Not Available]	[Not Available]	[Not Available]	[Not Applicable]	[Not Available]	NO
5EEF573E-6A44-4DC7-8AA7-B136863CE910	TCGA-E1-A7YW	TCGA-E1-A7YW-D61612	60C2DD63-0669-444B-8104-3CDBD15271F6	41866	Temodar	[Not Available]	Chemotherapy	418	NO	608	Clinical Progressive Disease	[Not Available]	[Not Available]	[Not Available]	[Not Available]	[Not Available]	[Not Available]	[Not Available]	[Not Available]	[Not Available]	[Not Available]	[Not Available]	[Not Available]	[Not Available]	[Not Applicable]	[Not Available]	NO
722C172F-46E6-47A1-82E5-3207278DF89B	TCGA-E1-A7YY	TCGA-E1-A7YY-D61626	4A36C2BC-E737-4A26-912B-61212551557A	41866	Temodar	[Not Available]	Chemotherapy	982	NO	1351	Stable Disease	[Not Available]	[Not Available]	[Not Available]	[Not Available]	[Not Available]	[Not Available]	[Not Available]	[Not Available]	[Not Available]	[Not Available]	[Not Available]	[Not Available]	[Not Available]	[Not Applicable]	[Not Available]	YES
722C172F-46E6-47A1-82E5-3207278DF89B	TCGA-E1-A7YY	TCGA-E1-A7YY-D61629	F865A9A1-5405-4ED7-8982-32BE7D405518	41866	Temodar	[Not Available]	Chemotherapy	2378	NO	2470	Clinical Progressive Disease	[Not Available]	[Not Available]	[Not Available]	[Not Available]	[Not Available]	[Not Available]	[Not Available]	[Not Available]	[Not Available]	[Not Available]	[Not Available]	[Not Available]	[Not Available]	[Not Applicable]	[Not Available]	NO
722C172F-46E6-47A1-82E5-3207278DF89B	TCGA-E1-A7YY	TCGA-E1-A7YY-D61631	B46C8F8D-1DE0-4243-90D2-896143B8DB38	41866	CCNU	[Not Available]	Chemotherapy	2465	NO	2590	Stable Disease	[Not Available]	[Not Available]	[Not Available]	[Not Available]	[Not Available]	[Not Available]	[Not Available]	[Not Available]	[Not Available]	[Not Available]	[Not Available]	[Not Available]	[Not Available]	[Not Applicable]	[Not Available]	NO
722C172F-46E6-47A1-82E5-3207278DF89B	TCGA-E1-A7YY	TCGA-E1-A7YY-D61633	9F5DC724-EF96-4637-8F7A-54D2380DEE17	41866	Temodar	[Not Available]	Chemotherapy	3501	NO	4152	Clinical Progressive Disease	[Not Available]	[Not Available]	[Not Available]	[Not Available]	[Not Available]	[Not Available]	[Not Available]	[Not Available]	[Not Available]	[Not Available]	[Not Available]	[Not Available]	[Not Available]	[Not Applicable]	[Not Available]	NO
722C172F-46E6-47A1-82E5-3207278DF89B	TCGA-E1-A7YY	TCGA-E1-A7YY-D61635	9CDFAC52-BFDF-45CC-9806-B36B7A015161	41866	VP-16	[Not Available]	Chemotherapy	4152	NO	4207	Clinical Progressive Disease	[Not Available]	[Not Available]	[Not Available]	[Not Available]	[Not Available]	[Not Available]	[Not Available]	[Not Available]	[Not Available]	[Not Available]	[Not Available]	[Not Available]	[Not Available]	[Not Applicable]	[Not Available]	NO
722C172F-46E6-47A1-82E5-3207278DF89B	TCGA-E1-A7YY	TCGA-E1-A7YY-D61638	918DD13E-DDC7-4DB8-8A7D-E2C12D364BFB	41866	Avastin	[Not Available]	Immunotherapy	4289	NO	4418	[Unknown]	[Not Available]	[Not Available]	[Not Available]	[Not Available]	[Not Available]	[Not Available]	[Not Available]	[Not Available]	[Not Available]	[Not Available]	[Not Available]	[Not Available]	[Not Available]	[Not Applicable]	[Not Available]	NO
97FFBE14-9070-4A5A-8760-225A88834B40	TCGA-E1-A7Z2	TCGA-E1-A7Z2-D61676	E49A4E1A-2003-4C46-9203-C77957172ECB	41866	Temodar	[Not Available]	Chemotherapy	102	NO	213	Clinical Progressive Disease	[Not Available]	[Not Available]	[Not Available]	[Not Available]	[Not Available]	[Not Available]	[Not Available]	[Not Available]	[Not Available]	[Not Available]	[Not Available]	[Not Available]	[Not Available]	[Not Applicable]	[Not Available]	NO
97FFBE14-9070-4A5A-8760-225A88834B40	TCGA-E1-A7Z2	TCGA-E1-A7Z2-D61679	3BBF97E6-A99D-4729-9DC4-0D5682FAAD0E	41866	Temodar	[Not Available]	Chemotherapy	230	NO	270	Clinical Progressive Disease	[Not Available]	[Not Available]	[Not Available]	[Not Available]	[Not Available]	[Not Available]	[Not Available]	[Not Available]	[Not Available]	[Not Available]	[Not Available]	[Not Available]	[Not Available]	[Not Applicable]	[Not Available]	NO
97FFBE14-9070-4A5A-8760-225A88834B40	TCGA-E1-A7Z2	TCGA-E1-A7Z2-D61684	D7ACEF48-175D-4009-89E8-CBB102479177	41866	Temodar	[Not Available]	Chemotherapy	286	NO	328	Stable Disease	[Not Available]	[Not Available]	[Not Available]	[Not Available]	[Not Available]	[Not Available]	[Not Available]	[Not Available]	[Not Available]	[Not Available]	[Not Available]	[Not Available]	[Not Available]	[Not Applicable]	[Not Available]	NO
97FFBE14-9070-4A5A-8760-225A88834B40	TCGA-E1-A7Z2	TCGA-E1-A7Z2-D61685	577CE699-A162-4B2B-A02B-2DCD62513704	41866	Avastin	[Not Available]	Immunotherapy	293	NO	334	Stable Disease	[Not Available]	[Not Available]	[Not Available]	[Not Available]	[Not Available]	[Not Available]	[Not Available]	[Not Available]	[Not Available]	[Not Available]	[Not Available]	[Not Available]	[Not Available]	[Not Applicable]	[Not Available]	NO
97FFBE14-9070-4A5A-8760-225A88834B40	TCGA-E1-A7Z2	TCGA-E1-A7Z2-D61686	5EF5B9BF-0974-44F1-BB04-29581A402B1A	41866	Temodar	[Not Available]	Chemotherapy	356	NO	383	Stable Disease	[Not Available]	[Not Available]	[Not Available]	[Not Available]	[Not Available]	[Not Available]	[Not Available]	[Not Available]	[Not Available]	[Not Available]	[Not Available]	[Not Available]	[Not Available]	[Not Applicable]	[Not Available]	NO
97FFBE14-9070-4A5A-8760-225A88834B40	TCGA-E1-A7Z2	TCGA-E1-A7Z2-D61687	93A4F821-08F8-4977-82FE-6034DCC8A9D2	41866	Avastin	[Not Available]	Immunotherapy	356	NO	369	Stable Disease	[Not Available]	[Not Available]	[Not Available]	[Not Available]	[Not Available]	[Not Available]	[Not Available]	[Not Available]	[Not Available]	[Not Available]	[Not Available]	[Not Available]	[Not Available]	[Not Applicable]	[Not Available]	NO
3AC41CC6-5DFB-40A1-BD13-5DC7CA2BB6F3	TCGA-E1-A7Z3	TCGA-E1-A7Z3-D61695	AF4DC37C-985A-4BF2-A364-273564BB866F	41869	I131-81C6	[Not Available]	Immunotherapy	1709	NO	1709	Clinical Progressive Disease	[Not Available]	[Not Available]	[Not Available]	[Not Available]	[Not Available]	[Not Available]	[Not Available]	[Not Available]	[Not Available]	[Not Available]	[Not Available]	[Not Available]	[Not Available]	[Not Applicable]	[Not Available]	YES
3AC41CC6-5DFB-40A1-BD13-5DC7CA2BB6F3	TCGA-E1-A7Z3	TCGA-E1-A7Z3-D61698	DDFEF29C-B6DB-49E6-AC99-A2F93816731A	41869	CCNU	[Not Available]	Chemotherapy	1911	NO	1921	Clinical Progressive Disease	[Not Available]	[Not Available]	[Not Available]	[Not Available]	[Not Available]	[Not Available]	[Not Available]	[Not Available]	[Not Available]	[Not Available]	[Not Available]	[Not Available]	[Not Available]	[Not Applicable]	[Not Available]	YES
3AC41CC6-5DFB-40A1-BD13-5DC7CA2BB6F3	TCGA-E1-A7Z3	TCGA-E1-A7Z3-D61699	3A267015-FFC3-4370-860D-AAB135DB3C2B	41869	Procarbazine	[Not Available]	Chemotherapy	1911	NO	1921	Clinical Progressive Disease	[Not Available]	[Not Available]	[Not Available]	[Not Available]	[Not Available]	[Not Available]	[Not Available]	[Not Available]	[Not Available]	[Not Available]	[Not Available]	[Not Available]	[Not Available]	[Not Applicable]	[Not Available]	YES
3AC41CC6-5DFB-40A1-BD13-5DC7CA2BB6F3	TCGA-E1-A7Z3	TCGA-E1-A7Z3-D61700	7C353942-BAB3-43B8-8530-CFCA1CB6318D	41869	Vincristine	[Not Available]	Chemotherapy	1911	NO	1921	Clinical Progressive Disease	[Not Available]	[Not Available]	[Not Available]	[Not Available]	[Not Available]	[Not Available]	[Not Available]	[Not Available]	[Not Available]	[Not Available]	[Not Available]	[Not Available]	[Not Available]	[Not Applicable]	[Not Available]	YES
3AC41CC6-5DFB-40A1-BD13-5DC7CA2BB6F3	TCGA-E1-A7Z3	TCGA-E1-A7Z3-D61702	35FBE083-45A7-43C7-BDC0-0CF019A52F5A	41869	CPT-11	[Not Available]	Chemotherapy	1995	NO	2072	Clinical Progressive Disease	[Not Available]	[Not Available]	[Not Available]	[Not Available]	[Not Available]	[Not Available]	[Not Available]	[Not Available]	[Not Available]	[Not Available]	[Not Available]	[Not Available]	[Not Available]	[Not Applicable]	[Not Available]	YES
975E17C2-B93C-4D45-8A85-786F365E4A93	TCGA-E1-A7Z4	TCGA-E1-A7Z4-D61742	45034EE3-2514-4F2E-BDAC-DA0F43B0E592	41870	Gliadel	[Not Available]	Chemotherapy	883	NO	883	Stable Disease	[Not Available]	[Not Available]	[Not Available]	[Not Available]	[Not Available]	[Not Available]	[Not Available]	[Not Available]	[Not Available]	[Not Available]	[Not Available]	[Not Available]	[Not Available]	[Not Applicable]	[Not Available]	NO
975E17C2-B93C-4D45-8A85-786F365E4A93	TCGA-E1-A7Z4	TCGA-E1-A7Z4-D61744	DAC8BC69-6B96-4C72-8F2A-081329407FC3	41870	Temodar	[Not Available]	Chemotherapy	896	NO	952	Clinical Progressive Disease	[Not Available]	[Not Available]	[Not Available]	[Not Available]	[Not Available]	[Not Available]	[Not Available]	[Not Available]	[Not Available]	[Not Available]	[Not Available]	[Not Available]	[Not Available]	[Not Applicable]	[Not Available]	NO
975E17C2-B93C-4D45-8A85-786F365E4A93	TCGA-E1-A7Z4	TCGA-E1-A7Z4-D61746	C4B86A27-716A-4EB9-9857-868CEBF922A0	41870	CCNU	[Not Available]	Chemotherapy	974	NO	1100	Clinical Progressive Disease	[Not Available]	[Not Available]	[Not Available]	[Not Available]	[Not Available]	[Not Available]	[Not Available]	[Not Available]	[Not Available]	[Not Available]	[Not Available]	[Not Available]	[Not Available]	[Not Applicable]	[Not Available]	NO
975E17C2-B93C-4D45-8A85-786F365E4A93	TCGA-E1-A7Z4	TCGA-E1-A7Z4-D61748	B907B025-FF2B-4F61-8A78-B413C29B8826	41870	Thalidomide	[Not Available]	[Not Available]	1101	NO	1176	Clinical Progressive Disease	[Not Available]	[Not Available]	[Not Available]	[Not Available]	[Not Available]	[Not Available]	[Not Available]	[Not Available]	[Not Available]	[Not Available]	[Not Available]	[Not Available]	[Not Available]	[Not Applicable]	[Not Available]	YES
975E17C2-B93C-4D45-8A85-786F365E4A93	TCGA-E1-A7Z4	TCGA-E1-A7Z4-D61749	C99CD020-7894-4F1F-A627-78E331F26389	41870	Cyclophosphamide	[Not Available]	Chemotherapy	1101	NO	1176	Clinical Progressive Disease	[Not Available]	[Not Available]	[Not Available]	[Not Available]	[Not Available]	[Not Available]	[Not Available]	[Not Available]	[Not Available]	[Not Available]	[Not Available]	[Not Available]	[Not Available]	[Not Applicable]	[Not Available]	YES
975E17C2-B93C-4D45-8A85-786F365E4A93	TCGA-E1-A7Z4	TCGA-E1-A7Z4-D61751	799AA848-1E30-4DC7-8CAA-B6F0AF17B2D8	41870	Karenitecin	[Not Available]	Chemotherapy	1182	NO	1249	Clinical Progressive Disease	[Not Available]	[Not Available]	[Not Available]	[Not Available]	[Not Available]	[Not Available]	[Not Available]	[Not Available]	[Not Available]	[Not Available]	[Not Available]	[Not Available]	[Not Available]	[Not Applicable]	[Not Available]	YES
975E17C2-B93C-4D45-8A85-786F365E4A93	TCGA-E1-A7Z4	TCGA-E1-A7Z4-D61753	9DF62BE0-F268-4DE1-8030-57475AC58C16	41870	Temodar	[Not Available]	Chemotherapy	1266	NO	1834	Stable Disease	[Not Available]	[Not Available]	[Not Available]	[Not Available]	[Not Available]	[Not Available]	[Not Available]	[Not Available]	[Not Available]	[Not Available]	[Not Available]	[Not Available]	[Not Available]	[Not Applicable]	[Not Available]	NO
975E17C2-B93C-4D45-8A85-786F365E4A93	TCGA-E1-A7Z4	TCGA-E1-A7Z4-D61754	0282393A-FCBA-4D4A-AC74-B0D9C5C66032	41870	Tamoxifen	[Not Available]	Hormone Therapy	1266	NO	1834	Stable Disease	[Not Available]	[Not Available]	[Not Available]	[Not Available]	[Not Available]	[Not Available]	[Not Available]	[Not Available]	[Not Available]	[Not Available]	[Not Available]	[Not Available]	[Not Available]	[Not Applicable]	[Not Available]	NO
975E17C2-B93C-4D45-8A85-786F365E4A93	TCGA-E1-A7Z4	TCGA-E1-A7Z4-D61756	A7B85916-1068-405F-B574-5D1E8807337B	41870	Avastin	[Not Available]	Immunotherapy	3545	NO	3888	Stable Disease	[Not Available]	[Not Available]	[Not Available]	[Not Available]	[Not Available]	[Not Available]	[Not Available]	[Not Available]	[Not Available]	[Not Available]	[Not Available]	[Not Available]	[Not Available]	[Not Applicable]	[Not Available]	NO
975E17C2-B93C-4D45-8A85-786F365E4A93	TCGA-E1-A7Z4	TCGA-E1-A7Z4-D61758	0161FE00-CD4D-47E4-879C-208B19B2958B	41870	Avastin	[Not Available]	Immunotherapy	4081	NO	4124	Clinical Progressive Disease	[Not Available]	[Not Available]	[Not Available]	[Not Available]	[Not Available]	[Not Available]	[Not Available]	[Not Available]	[Not Available]	[Not Available]	[Not Available]	[Not Available]	[Not Available]	[Not Applicable]	[Not Available]	NO
975E17C2-B93C-4D45-8A85-786F365E4A93	TCGA-E1-A7Z4	TCGA-E1-A7Z4-D61759	7964078B-3059-4440-8855-5ADA2090CFE0	41870	Temodar	[Not Available]	Chemotherapy	4081	NO	4137	Clinical Progressive Disease	[Not Available]	[Not Available]	[Not Available]	[Not Available]	[Not Available]	[Not Available]	[Not Available]	[Not Available]	[Not Available]	[Not Available]	[Not Available]	[Not Available]	[Not Available]	[Not Applicable]	[Not Available]	NO
975E17C2-B93C-4D45-8A85-786F365E4A93	TCGA-E1-A7Z4	TCGA-E1-A7Z4-D61761	98E606FE-D8E2-423E-A0EF-C9F8D553ED9C	41870	Avastin	[Not Available]	Immunotherapy	4138	NO	4336	Clinical Progressive Disease	[Not Available]	[Not Available]	[Not Available]	[Not Available]	[Not Available]	[Not Available]	[Not Available]	[Not Available]	[Not Available]	[Not Available]	[Not Available]	[Not Available]	[Not Available]	[Not Applicable]	[Not Available]	NO
975E17C2-B93C-4D45-8A85-786F365E4A93	TCGA-E1-A7Z4	TCGA-E1-A7Z4-D61762	5CD187C5-7576-451C-B84D-341B29CC2732	41870	Carboplatin	[Not Available]	Chemotherapy	4138	NO	4308	Clinical Progressive Disease	[Not Available]	[Not Available]	[Not Available]	[Not Available]	[Not Available]	[Not Available]	[Not Available]	[Not Available]	[Not Available]	[Not Available]	[Not Available]	[Not Available]	[Not Available]	[Not Applicable]	[Not Available]	NO
8B10F00F-FDE6-423D-BC36-027931359A5A	TCGA-E1-A7Z6	TCGA-E1-A7Z6-D61768	5E182D11-B082-4B6B-893A-51EA9ABE7041	41870	Temodar	[Not Available]	Chemotherapy	356	NO	705	Stable Disease	[Not Available]	[Not Available]	[Not Available]	[Not Available]	[Not Available]	[Not Available]	[Not Available]	[Not Available]	[Not Available]	[Not Available]	[Not Available]	[Not Available]	[Not Available]	[Not Applicable]	[Not Available]	NO
8B10F00F-FDE6-423D-BC36-027931359A5A	TCGA-E1-A7Z6	TCGA-E1-A7Z6-D61773	E16FBDC2-F705-40B9-AAF1-4597CD3CACF3	41870	Temodar	[Not Available]	Chemotherapy	907	NO	964	Clinical Progressive Disease	[Not Available]	[Not Available]	[Not Available]	[Not Available]	[Not Available]	[Not Available]	[Not Available]	[Not Available]	[Not Available]	[Not Available]	[Not Available]	[Not Available]	[Not Available]	[Not Applicable]	[Not Available]	NO
8B10F00F-FDE6-423D-BC36-027931359A5A	TCGA-E1-A7Z6	TCGA-E1-A7Z6-D61774	86902F7A-58BF-43A9-A43C-9FF453EAC8B3	41870	Avastin	[Not Available]	Immunotherapy	901	NO	966	Clinical Progressive Disease	[Not Available]	[Not Available]	[Not Available]	[Not Available]	[Not Available]	[Not Available]	[Not Available]	[Not Available]	[Not Available]	[Not Available]	[Not Available]	[Not Available]	[Not Available]	[Not Applicable]	[Not Available]	NO
e09f93e1-1649-48fa-9e2e-d13ac6d50b97	TCGA-FG-5962	TCGA-FG-5962-D14111	08349992-366b-42ba-8cb9-e93b7b024923	40745	Temodar	[Not Available]	Chemotherapy	112	NO	258	[Not Available]	[Not Available]	[Not Available]	[Not Available]	6	[Not Available]	mg	mg	320-400	2	PO	[Not Available]	[Not Available]	ADJUVANT	[Not Applicable]	10800	[Not Available]
e09f93e1-1649-48fa-9e2e-d13ac6d50b97	TCGA-FG-5962	TCGA-FG-5962-D14107	310362a0-7d4a-4042-beec-96856efdea8a	40745	Temodar	[Not Available]	Chemotherapy	28	NO	79	[Not Available]	[Not Available]	[Not Available]	[Not Available]	1	[Not Available]	mg	mg	160	1	PO	[Not Available]	[Not Available]	ADJUVANT	[Not Applicable]	6720	[Not Available]
68f550ca-3a33-45e4-b1c9-14f99e543263	TCGA-FG-5963	TCGA-FG-5963-D9984	cfce2c0b-61d3-452b-ba97-2eed34aca74b	40646	Temodar	[Not Available]	Chemotherapy	428	NO	471	[Not Available]	[Not Available]	[Not Available]	[Not Available]	1	[Not Available]	mg	mg	140	1	PO	[Not Available]	[Not Available]	PROGRESSION	[Not Applicable]	5880	[Not Available]
68f550ca-3a33-45e4-b1c9-14f99e543263	TCGA-FG-5963	TCGA-FG-5963-D42999	B2B918A8-6647-4CAA-A5BA-E962B2ED4CD1	41401	Temodar	[Not Available]	Chemotherapy	517	NO	690	Clinical Progressive Disease	[Not Available]	[Not Available]	[Not Available]	[Not Available]	[Not Available]	[Not Available]	[Not Available]	[Not Available]	[Not Available]	[Not Available]	[Not Available]	[Not Available]	[Not Available]	[Not Applicable]	[Not Available]	NO
68f550ca-3a33-45e4-b1c9-14f99e543263	TCGA-FG-5963	TCGA-FG-5963-D43000	CC00B63C-9810-4ADC-A195-77E5574FD002	41401	Avastin	[Not Available]	Chemotherapy	511	NO	727	Clinical Progressive Disease	[Not Available]	[Not Available]	[Not Available]	[Not Available]	[Not Available]	[Not Available]	[Not Available]	[Not Available]	[Not Available]	[Not Available]	[Not Available]	[Not Available]	[Not Available]	[Not Applicable]	[Not Available]	NO
68f550ca-3a33-45e4-b1c9-14f99e543263	TCGA-FG-5963	TCGA-FG-5963-D43015	7A6CD594-2F09-408B-BD86-DA385019EF0D	41402	BCNU	[Not Available]	Chemotherapy	699	NO	700	Clinical Progressive Disease	[Not Available]	[Not Available]	[Not Available]	[Not Available]	[Not Available]	[Not Available]	[Not Available]	[Not Available]	[Not Available]	[Not Available]	[Not Available]	[Not Available]	[Not Available]	[Not Applicable]	[Not Available]	NO
2cfc07f3-a31c-41a2-a9e3-b708d2421a78	TCGA-FG-5965	TCGA-FG-5965-D14155	dfd47724-148f-4d6f-8e91-8eb96911e943	40746	Temodar	[Not Available]	Chemotherapy	790	YES	[Not Available]	[Not Available]	[Not Available]	[Not Available]	[Not Available]	6	[Not Available]	mg	mg	300-320	1	PO	[Not Available]	[Not Available]	PROGRESSION	[Not Applicable]	9500	[Not Available]
dadd7428-9e4d-4652-9469-ab521b88d529	TCGA-FG-6688	TCGA-FG-6688-D14644	3882f392-f750-4236-adc1-8196e3e64b74	40760	Temodar	[Not Available]	Chemotherapy	159	YES	[Not Available]	[Not Available]	[Not Available]	[Not Available]	[Not Available]	3	[Not Available]	mg	mg	345-460	1	PO	[Not Available]	[Not Available]	ADJUVANT	[Not Applicable]	5750	[Not Available]
dadd7428-9e4d-4652-9469-ab521b88d529	TCGA-FG-6688	TCGA-FG-6688-D32792	112A79D4-BB4F-4DDC-B489-5234CE6720FA	41072	Avastin	[Not Available]	Chemotherapy	483	YES	[Not Available]	Stable Disease	[Not Available]	[Not Available]	[Not Available]	[Not Available]	[Not Available]	[Not Available]	[Not Available]	[Not Available]	[Not Available]	[Not Available]	[Not Available]	[Not Available]	[Not Available]	[Not Applicable]	[Not Available]	NO
8d07b1e8-5d1d-4a43-b616-d29dd58ce5fe	TCGA-FG-6689	TCGA-FG-6689-D32856	7EDCB89C-DE05-43F5-BFB5-03D43EB7FA16	41074	Temodar	[Not Available]	Chemotherapy	267	NO	424	Stable Disease	[Not Available]	[Not Available]	[Not Available]	[Not Available]	[Not Available]	[Not Available]	[Not Available]	[Not Available]	[Not Available]	[Not Available]	[Not Available]	[Not Available]	[Not Available]	[Not Applicable]	[Not Available]	NO
e4d9b696-3311-44e7-9191-fde56c080a00	TCGA-FG-6691	TCGA-FG-6691-D63746	3B2BB044-E4EE-47E4-96F2-8D84AB7943C3	41866	Temodar	[Not Available]	Chemotherapy	1135	YES	[Not Available]	[Not Applicable]	[Not Available]	[Not Available]	[Not Available]	[Not Available]	[Not Available]	[Not Available]	[Not Available]	[Not Available]	[Not Available]	[Not Available]	[Not Available]	[Not Available]	[Not Available]	[Not Applicable]	[Not Available]	NO
5f10cd91-1e03-4016-b35a-8629a1a8fcc9	TCGA-FG-6692	TCGA-FG-6692-D32839	CCA2C4C1-27B5-4165-8E5D-3FCAFA02E0A2	41073	Temodar	[Not Available]	Chemotherapy	149	YES	[Not Available]	[Not Applicable]	[Not Available]	[Not Available]	[Not Available]	[Not Available]	[Not Available]	[Not Available]	[Not Available]	[Not Available]	[Not Available]	[Not Available]	[Not Available]	[Not Available]	[Not Available]	[Not Applicable]	[Not Available]	NO
b342e980-8383-4f1b-bf57-4098c37a536c	TCGA-FG-7636	TCGA-FG-7636-D19850	7b3133a0-75ec-4ece-b722-8deb8f2823d2	40906	Temodar	[Not Available]	Chemotherapy	33	NO	84	[Not Available]	[Not Available]	[Not Available]	[Not Available]	1	[Not Available]	mg	mg	150	1	PO	[Not Available]	[Not Available]	ADJUVANT	[Not Applicable]	6300	[Not Available]
1f54d21e-752f-496d-8453-4b9b8738cbce	TCGA-FG-7638	TCGA-FG-7638-D20408	e75a0f71-b3d0-4896-ad35-9d7062cf4fd7	40554	Temodar	[Not Available]	Chemotherapy	37	NO	78	[Not Available]	[Not Available]	[Not Available]	[Not Available]	1	[Not Available]	mg	mg	145	1	PO	[Not Available]	[Not Available]	ADJUVANT	[Not Applicable]	6090	[Not Available]
1f54d21e-752f-496d-8453-4b9b8738cbce	TCGA-FG-7638	TCGA-FG-7638-D43362	E71157DA-8780-4039-A459-78C0B78182C3	41414	Temodar	[Not Available]	Chemotherapy	122	NO	336	Stable Disease	[Not Available]	[Not Available]	[Not Available]	[Not Available]	[Not Available]	[Not Available]	[Not Available]	[Not Available]	[Not Available]	[Not Available]	[Not Available]	[Not Available]	[Not Available]	[Not Applicable]	[Not Available]	NO
1f54d21e-752f-496d-8453-4b9b8738cbce	TCGA-FG-7638	TCGA-FG-7638-D43365	2C840323-3AB9-4788-9A3C-40B8FA3AAD99	41414	Temodar	[Not Available]	Chemotherapy	411	NO	595	Stable Disease	[Not Available]	[Not Available]	[Not Available]	[Not Available]	[Not Available]	[Not Available]	[Not Available]	[Not Available]	[Not Available]	[Not Available]	[Not Available]	[Not Available]	[Not Available]	[Not Applicable]	[Not Available]	NO
1159c88c-39d0-4c03-9c66-36af5340a67a	TCGA-FG-8181	TCGA-FG-8181-D64420	2D62A107-8CCE-489F-92A4-C38E2B1ACA7F	41884	Temodar	[Not Available]	Chemotherapy	64	NO	105	Stable Disease	[Not Available]	[Not Available]	[Not Available]	[Not Available]	[Not Available]	[Not Available]	[Not Available]	[Not Available]	[Not Available]	[Not Available]	[Not Available]	[Not Available]	[Not Available]	[Not Applicable]	[Not Available]	NO
fb3884df-3680-4c5b-8092-981007aeba03	TCGA-FG-8185	TCGA-FG-8185-D32545	CE3F4131-147E-44A0-A306-3F54F2F9BDFE	41060	Temodar	[Not Available]	Chemotherapy	21	NO	70	Stable Disease	[Not Available]	[Not Available]	[Not Available]	[Not Available]	[Not Available]	[Not Available]	[Not Available]	[Not Available]	[Not Available]	[Not Available]	[Not Available]	[Not Available]	[Not Available]	[Not Applicable]	[Not Available]	NO
fb3884df-3680-4c5b-8092-981007aeba03	TCGA-FG-8185	TCGA-FG-8185-D43369	CDCD9C6D-0CD2-4E48-B07E-DBC61F09EE3A	41414	Temodar	[Not Available]	Chemotherapy	97	NO	412	Complete Response	[Not Available]	[Not Available]	[Not Available]	[Not Available]	[Not Available]	[Not Available]	[Not Available]	[Not Available]	[Not Available]	[Not Available]	[Not Available]	[Not Available]	[Not Available]	[Not Applicable]	[Not Available]	NO
5469c0e8-0c58-4870-b897-8fa0704599a7	TCGA-FG-8189	TCGA-FG-8189-D42251	9A6538E8-AB2B-44EF-A0F5-1AA3B71111EF	41379	Temodar	Chemotherapy	Chemotherapy	105	NO	159	Stable Disease	[Not Available]	[Not Available]	[Not Available]	[Not Available]	[Not Available]	[Not Available]	[Not Available]	[Not Available]	[Not Available]	[Not Available]	[Not Available]	[Not Available]	[Not Available]	[Not Applicable]	[Not Available]	YES
5469c0e8-0c58-4870-b897-8fa0704599a7	TCGA-FG-8189	TCGA-FG-8189-D42255	6AD8B764-E9BA-499F-9D06-724575C8DBA0	41379	Temodar	Chemotherapy	Chemotherapy	190	NO	221	Stable Disease	[Not Available]	[Not Available]	[Not Available]	[Not Available]	[Not Available]	[Not Available]	[Not Available]	[Not Available]	[Not Available]	[Not Available]	[Not Available]	[Not Available]	[Not Available]	[Not Applicable]	[Not Available]	YES
029b33b1-7ea9-4b77-a615-7eb0e3ebd5e7	TCGA-FG-8191	TCGA-FG-8191-D32716	3AD13E50-1087-452C-ACA6-CF2E3EFFED20	41080	Temodar	[Not Available]	Chemotherapy	31	NO	76	Stable Disease	[Not Available]	[Not Available]	[Not Available]	[Not Available]	[Not Available]	[Not Available]	[Not Available]	[Not Available]	[Not Available]	[Not Available]	[Not Available]	[Not Available]	[Not Available]	[Not Applicable]	[Not Available]	NO
029b33b1-7ea9-4b77-a615-7eb0e3ebd5e7	TCGA-FG-8191	TCGA-FG-8191-D43400	EE6C5FFC-7ABE-44E6-BBE6-EFC24033B9A9	41414	Temodar	[Not Available]	Chemotherapy	122	NO	448	Stable Disease	[Not Available]	[Not Available]	[Not Available]	[Not Available]	[Not Available]	[Not Available]	[Not Available]	[Not Available]	[Not Available]	[Not Available]	[Not Available]	[Not Available]	[Not Available]	[Not Applicable]	[Not Available]	NO
DCE168B1-D2A9-4409-8437-AB382F6D7D31	TCGA-FG-A4MW	TCGA-FG-A4MW-D39710	2B02C0A0-719B-48E1-A7F1-DEB9BC1C4F78	41304	Temodar	[Not Available]	Chemotherapy	32	NO	71	Stable Disease	[Not Available]	[Not Available]	[Not Available]	[Not Available]	[Not Available]	[Not Available]	[Not Available]	[Not Available]	[Not Available]	[Not Available]	[Not Available]	[Not Available]	[Not Available]	[Not Applicable]	[Not Available]	NO
DCE168B1-D2A9-4409-8437-AB382F6D7D31	TCGA-FG-A4MW	TCGA-FG-A4MW-D39712	5E3E00F7-6C27-42D4-A54F-744510155C02	41304	Temodar	[Not Available]	Chemotherapy	101	NO	105	Stable Disease	[Not Available]	[Not Available]	[Not Available]	[Not Available]	[Not Available]	[Not Available]	[Not Available]	[Not Available]	[Not Available]	[Not Available]	[Not Available]	[Not Available]	[Not Available]	[Not Applicable]	[Not Available]	NO
DCE168B1-D2A9-4409-8437-AB382F6D7D31	TCGA-FG-A4MW	TCGA-FG-A4MW-D61645	9B07A59C-3AF4-4CE4-AB86-37E3F96535BA	41822	Avastin	[Not Available]	[Not Available]	231	NO	379	Clinical Progressive Disease	[Not Available]	[Not Available]	[Not Available]	[Not Available]	[Not Available]	[Not Available]	[Not Available]	[Not Available]	[Not Available]	[Not Available]	[Not Available]	[Not Available]	[Not Available]	[Not Applicable]	[Not Available]	NO
AE4F0714-3B74-46C0-9C1B-F028C7CF2E62	TCGA-FG-A6J3	TCGA-FG-A6J3-D48232	1EB2DA09-3CFC-44F9-B194-06BBE1D6AE9C	41527	Temodar	[Not Available]	Chemotherapy	27	NO	74	Stable Disease	[Not Available]	[Not Available]	[Not Available]	[Not Available]	[Not Available]	[Not Available]	[Not Available]	[Not Available]	[Not Available]	[Not Available]	[Not Available]	[Not Available]	[Not Available]	[Not Applicable]	[Not Available]	NO
AE4F0714-3B74-46C0-9C1B-F028C7CF2E62	TCGA-FG-A6J3	TCGA-FG-A6J3-D48501	9889AC41-FA07-43AF-8AE0-D489D0085685	41533	Temodar	[Not Available]	Chemotherapy	116	YES	[Not Available]	[Not Applicable]	[Not Available]	[Not Available]	[Not Available]	[Not Available]	[Not Available]	[Not Available]	[Not Available]	[Not Available]	[Not Available]	[Not Available]	[Not Available]	[Not Available]	[Not Available]	[Not Applicable]	[Not Available]	NO
C6CEB220-282E-4EEF-8D36-4CE0A625CF7E	TCGA-FG-A70Y	TCGA-FG-A70Y-D57573	C7CBCD44-0546-4E1D-A33A-79E3D22C8167	41715	Temodar	[Not Available]	Chemotherapy	515	NO	554	Stable Disease	[Not Available]	[Not Available]	[Not Available]	[Not Available]	[Not Available]	[Not Available]	[Not Available]	[Not Available]	[Not Available]	[Not Available]	[Not Available]	[Not Available]	[Not Available]	[Not Applicable]	[Not Available]	NO
98E82E98-341A-4BCA-92C0-23C65C1BF94F	TCGA-FG-A70Z	TCGA-FG-A70Z-D52303	BCD4BD78-2CB1-4359-A5B8-C7E9C6ADC425	41610	Temodar	[Not Available]	Chemotherapy	298	NO	328	[Unknown]	[Not Available]	[Not Available]	[Not Available]	[Not Available]	[Not Available]	[Not Available]	[Not Available]	[Not Available]	[Not Available]	[Not Available]	[Not Available]	[Not Available]	[Not Available]	[Not Applicable]	[Not Available]	NO
5B199E7E-CC23-4065-88AD-FDFE3D0683D6	TCGA-FG-A710	TCGA-FG-A710-D52090	05A41623-D7F0-4D8E-BE95-99FD6083FAAE	41605	Temodar	[Not Available]	Chemotherapy	18	NO	218	Stable Disease	[Not Available]	[Not Available]	[Not Available]	[Not Available]	[Not Available]	[Not Available]	[Not Available]	[Not Available]	[Not Available]	[Not Available]	[Not Available]	[Not Available]	[Not Available]	[Not Applicable]	[Not Available]	NO
1F5B6B07-45F5-4DA4-932A-DF9665F6C538	TCGA-FG-A711	TCGA-FG-A711-D52361	7EB7A18F-9270-4C94-BC38-F4AD094E0753	41610	Temodar	[Not Available]	Chemotherapy	350	NO	673	Clinical Progressive Disease	[Not Available]	[Not Available]	[Not Available]	[Not Available]	[Not Available]	[Not Available]	[Not Available]	[Not Available]	[Not Available]	[Not Available]	[Not Available]	[Not Available]	[Not Available]	[Not Applicable]	[Not Available]	NO
1F5B6B07-45F5-4DA4-932A-DF9665F6C538	TCGA-FG-A711	TCGA-FG-A711-D52581	0EF92496-C0FB-4C0D-8737-B98B06D1C2FC	41612	Temodar	[Not Available]	Chemotherapy	733	NO	774	Clinical Progressive Disease	[Not Available]	[Not Available]	[Not Available]	[Not Available]	[Not Available]	[Not Available]	[Not Available]	[Not Available]	[Not Available]	[Not Available]	[Not Available]	[Not Available]	[Not Available]	[Not Applicable]	[Not Available]	NO
1F5B6B07-45F5-4DA4-932A-DF9665F6C538	TCGA-FG-A711	TCGA-FG-A711-D52595	2F01441C-80E1-40F1-B28A-BDDDBEF4AC52	41612	Avastin	[Not Available]	Immunotherapy	1097	YES	[Not Available]	[Not Applicable]	[Not Available]	[Not Available]	[Not Available]	[Not Available]	[Not Available]	[Not Available]	[Not Available]	[Not Available]	[Not Available]	[Not Available]	[Not Available]	[Not Available]	[Not Available]	[Not Applicable]	[Not Available]	NO
1F5B6B07-45F5-4DA4-932A-DF9665F6C538	TCGA-FG-A711	TCGA-FG-A711-D52597	1285B580-A770-4193-9D6E-721FB74D941B	41612	CCNU	[Not Available]	Chemotherapy	1155	NO	1195	Clinical Progressive Disease	[Not Available]	[Not Available]	[Not Available]	[Not Available]	[Not Available]	[Not Available]	[Not Available]	[Not Available]	[Not Available]	[Not Available]	[Not Available]	[Not Available]	[Not Available]	[Not Applicable]	[Not Available]	NO
[truncated: 227 more rows]

## Sheet: LUSC
bcr_patient_uuid	bcr_patient_barcode	bcr_drug_barcode	bcr_drug_uuid	form_completion_date	pharmaceutical_therapy_drug_name	clinical_trial_drug_classification	pharmaceutical_therapy_type	pharmaceutical_tx_started_days_to	pharmaceutical_tx_ongoing_indicator	pharmaceutical_tx_ended_days_to	treatment_best_response	days_to_stem_cell_transplantation	pharm_regimen	pharm_regimen_other	pharma_adjuvant_cycles_count	pharma_type_other	pharmaceutical_tx_dose_units	pharmaceutical_tx_total_dose_units	prescribed_dose	regimen_number	route_of_administration	stem_cell_transplantation	stem_cell_transplantation_type	therapy_regimen	therapy_regimen_other	total_dose	tx_on_clinical_trial
[truncated: 359 more rows]

[truncated: 2 more sheets: SKCM, UVM]
